# Supplementary material for: Investigation of TGFβ1-Induced Long Noncoding RNAs in Endothelial Cells
Source: Hindawi journal article supplement (doi:10.1155/2016/2459687), 2016-01-01
Supplement: f1 [file 2459687.f1.zip]

# Investigation of TGFβ1-induced Long Non-Coding RNAs in Endothelial Cells

Krishna K. Singh,<sup>1,2,3,4</sup> Pratiek N. Matkar,<sup>4,5</sup> Adrian Quan,<sup>2</sup> Laura-Eve Mantella,<sup>2,6</sup>

Hwee Teoh,<sup>2,7</sup> Mohammed Al-Omran<sup>1,3,4,8</sup>, Subodh Verma<sup>2,3,4,6</sup>

<sup>1</sup>*Division of Vascular Surgery, Keenan Research Centre for Biomedical Science at St. Michael's Hospital, Toronto, Ontario, M5B 1W8, Canada*

<sup>2</sup>*Division of Cardiac Surgery, Keenan Research Centre for Biomedical Science at St. Michael's Hospital, Toronto, Ontario, M5B 1W8, Canada*

<sup>3</sup>*Department of Surgery, University of Toronto, Toronto, Ontario, M5T 1P5, Canada*

<sup>4</sup>*Institute of Medical Science, University of Toronto, Toronto, Ontario, M5S 1A8, Canada*

<sup>5</sup>*Division of Cardiology, Keenan Research Centre for Biomedical Science at St. Michael's Hospital, Toronto, Ontario, M5B 1W8, Canada*

<sup>6</sup>*Department of Pharmacology and Toxicology, University of Toronto, Toronto, Ontario, M5S 1A8, Canada*

<sup>7</sup>*Division of Endocrinology & Metabolism, Li Ka Shing Knowledge Institute at St. Michael's Hospital, Toronto, Ontario, M5B 1W8, Canada*

<sup>8</sup>*Department of Surgery, King Saud University and the King Saud University-Li Ka Shing Collaborative Research Program, Riyadh 12372, Kingdom of Saudi Arabia*

Correspondence should be addressed to Subodh Verma; Division of Cardiac Surgery, St. Michael's Hospital, 8<sup>th</sup> Floor, Bond Wing, 30 Bond Street, Toronto, ON, M5B 1W8, Canada, Tel.: 1-416-864-5997; Fax: 1-416-864-5881; e-mail: vermasu@smh.ca

Keywords: lncRNA, endothelial cells, TGFβ1

Supplementary Figure 1

A

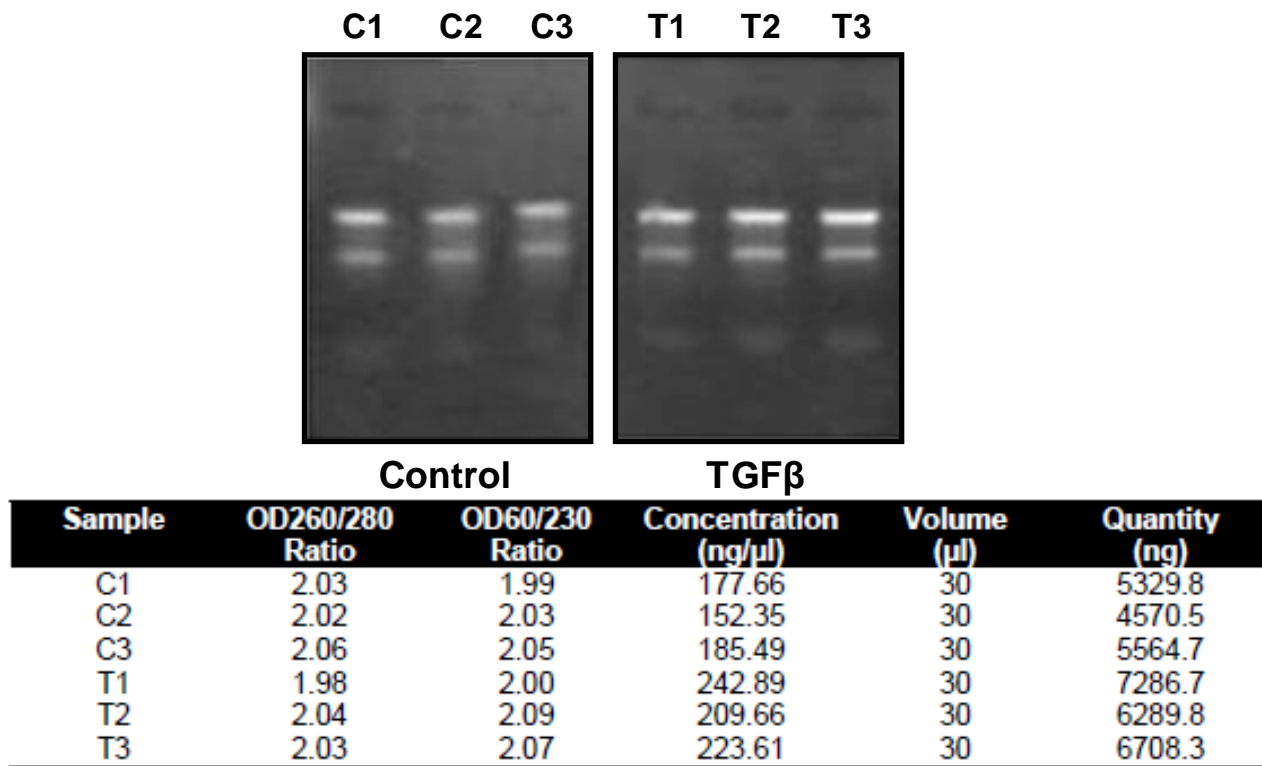

B

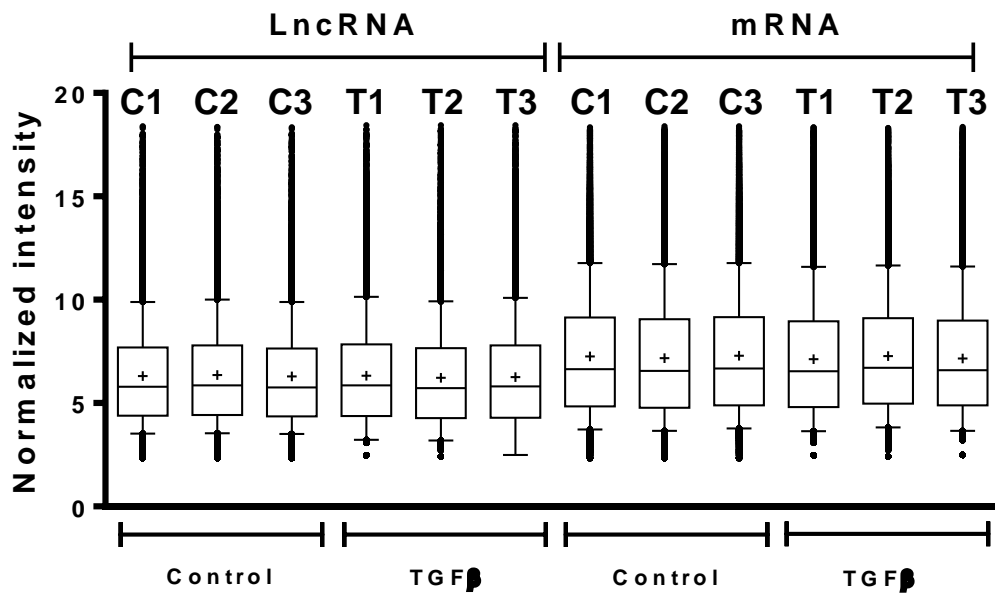

Supplementary Figure 2

A

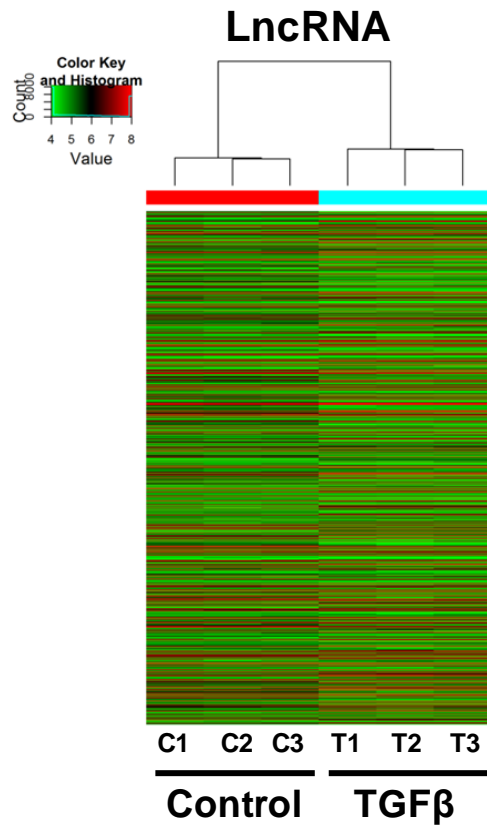

B

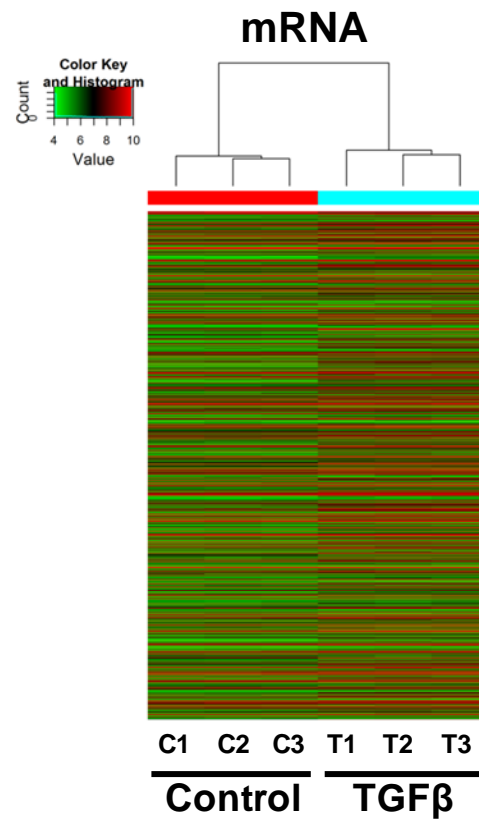

**Supplementary Figure 1. Quality assessment of RNAs, lncRNAs and mRNAs Data. A.**

Image of denaturing agarose gel (1%) used to assess RNA integrity and genomic DNA contamination. The 28s and 18s rRNA bands were clear and intact. The larger rRNA (28s) bands were more intense in comparison to the corresponding lower rRNA (18s) bands. The table shows the absorbance ratio for wavelengths 260nm/280nm and 260nm/230nm, concentration and the quantity of RNA used for array. **B.** Box-and-Whisker plots (10<sup>th</sup>, 90<sup>th</sup> percentile) showing normalized intensity for the 6 study samples to quickly visualize the distribution of our dataset. Mean intensity is denoted with a “+” sign. C1, C2 and C3 represent the control group, and T1, T2 and T3 represent the TGFβ1 (10 ng/mL)-treated group.

**Supplementary Figure 2. Heat map and hierarchical clustering of differences in lncRNA and mRNA expression from HUVECs exposed to TGFβ1 (10 ng/mL) vs. Control. A & B.**

The dendrogram shows the relationships among the expression levels of samples. Hierarchical clustering that was performed based on ‘differentially expressed lncRNAs and mRNAs’, shows a distinguishable lncRNA and mRNA expression profiling among samples.
