# Supplementary material for: Investigation of TGFβ1-Induced Long Noncoding RNAs in Endothelial Cells
Source: Int J Vasc Med. 2016 Apr 10;2016:2459687. doi: 10.1155/2016/2459687 (PMC4842052; doi:10.1155/2016/2459687)
Supplement: Supplementary file 1 — Quality Assessment of RNA Samples and Data Analysis. RNA integrity and genomic DNA contamination were evaluated by denaturing agarose gel electrophoresis. In all of the samples, the intensity of the upper 28S ribosomal RNA band was about twice that of the lower 18S band thereby confirming the integrity of the RNA studied. The absence of smears above the 28S band attests to the purity of the RNA samples. RNA quantity and purity were also assessed with the NanoDrop ND-1000. The combination of optical density (OD) A260/A280 ratios that were close to 2.0 and A260/A230 ratios that exceeded 1.8 further confirmed the purity of the RNA used. The Box Plot is a well accepted means to quickly visualize the distribution of a dataset. Our Box plots (10th, 90th percentile) showed comparable distributions of expression values after normalization. Hierarchical clustering is a widely used method for analysis of gene expression. Cluster analysis groups samples based on their expression levels with dendrograms summarize the arrangement of said clusters. The supplementary tables report the fold change, P value, false discovery rate, annotations, and raw and normalized intensities for differentially expressed and up-/down-regulated lncRNAs and mRNAs in TGFβ1-treated HUVECs relative to control HUVECs. [file 2459687.f1.zip]

Archive with 5 entries (5 files):
- 2459687.pdf
- Supplement Table A-LncRNA_UP_TGFb1-treated_vs_Controlsample.xlsx
- Supplement Table B-LncRNA_DOWN_TGFb1-treated_vs_Controlsample.xlsx
- Supplement Table C-mRNA_UP_TGFb1-treated_vs_Controlsample.xlsx
- Supplement Table D-mRNA_DOWN_TGFb1-treated_vs_Controlsample.xlsx
