# Supplementary material for: Investigation of TGFβ1-Induced Long Noncoding RNAs in Endothelial Cells
Source: Int J Vasc Med. 2016 Apr 10;2016:2459687. doi: 10.1155/2016/2459687 (PMC4842052; doi:10.1155/2016/2459687)
Supplement: Supplementary file 1 — Quality Assessment of RNA Samples and Data Analysis. RNA integrity and genomic DNA contamination were evaluated by denaturing agarose gel electrophoresis. In all of the samples, the intensity of the upper 28S ribosomal RNA band was about twice that of the lower 18S band thereby confirming the integrity of the RNA studied. The absence of smears above the 28S band attests to the purity of the RNA samples. RNA quantity and purity were also assessed with the NanoDrop ND-1000. The combination of optical density (OD) A260/A280 ratios that were close to 2.0 and A260/A230 ratios that exceeded 1.8 further confirmed the purity of the RNA used. The Box Plot is a well accepted means to quickly visualize the distribution of a dataset. Our Box plots (10th, 90th percentile) showed comparable distributions of expression values after normalization. Hierarchical clustering is a widely used method for analysis of gene expression. Cluster analysis groups samples based on their expression levels with dendrograms summarize the arrangement of said clusters. The supplementary tables report the fold change, P value, false discovery rate, annotations, and raw and normalized intensities for differentially expressed and up-/down-regulated lncRNAs and mRNAs in TGFβ1-treated HUVECs relative to control HUVECs. [file 2459687.f1.zip › Supplement Table A-LncRNA_UP_TGFb1-treated_vs_Controlsample.xlsx]

## Sheet: Sheet1
# Fold Change cut-off: 2.0 # P-value cut-off: 0.05 # Condition pairs: TGFb1-treated_vs_Controlsample # Column A: ProbeName it represents probe name. # Column B: P-value, P-value calculated from unpaired t-test. # Column C: FDR, FDR is calculated from Benjamini Hochberg FDR. # Column D: FC (abs), the absolute ratio (no log scale) of normalized intensities between two conditions. # Column E: Regula…
TGFb1-treated_vs_Controlsample 2.0 fold up regulated LncRNAs
	P-value and FDR		Fold change and Regulation		Annotations																		Group--Raw Intensity		Group--Normalized Intensity		Raw Intensity						Normalized Intensity
ProbeName	P-value	FDR	FC (abs)	Regulation	type	seqname	GeneSymbol	source	RNAlength	chrom	strand	txStart	txEnd	Xhyb	Sequence	relationship	Associated_gene_acc	Associated_gene_name	Associated_protein_name	Associated_gene_strand	Associated_gene_start	Associated_gene_end	group-TGFb1-treated(raw)	group-Controlsample(raw)	group-TGFb1-treated(normalized)	group-Controlsample(normalized)	[10, TGFb1-treated](raw)	[11, TGFb1-treated](raw)	[12, TGFb1-treated](raw)	[1, Controlsample](raw)	[2, Controlsample](raw)	[3, Controlsample](raw)	[10, TGFb1-treated](normalized)	[11, TGFb1-treated](normalized)	[12, TGFb1-treated](normalized)	[1, Controlsample](normalized)	[2, Controlsample](normalized)	[3, Controlsample](normalized)
ASHGA5P048339	0.00248174	0.0164011	2.20304	up	noncoding	ENST00000528781	RP11-672A2.6	GENCODE	831	chr11	-	76336505	76337878		AATTTGTTCTGATCCTAAGGTCACTATCCTTAATCCCTCTCCCTGTGGGGTCTTCCCTAT	intergenic							2351.67	1231.24	11.1688	10.0293	2556.36	2482.78	2015.86	1097.55	1273.89	1322.29	11.3707	10.9328	11.2029	9.81517	10.1783	10.0943
ASHGA5P031073	0.00165247	0.0128632	2.30992	up	noncoding	ENST00000567795	CTD-2574D22.4	GENCODE	2270	chr16	-	29930956	29933226		GAGTATGTGTGTGTGTGTGTATTTGCTTGCCAAAATACAATCGTGTTGTATGAAATGTTT	intron sense-overlapping	NM_178863	KCTD13	BTB/POZ domain-containing adapter for CUL3-mediated RhoA degradation protein 1	-	29917656	29937545	63569.5	35666.4	16.1248	14.917	52460	78688.9	59559.8	34877.4	37492.4	34629.4	15.8182	16.3499	16.2064	14.8825	14.9514	14.917
ASHGA5P022787	0.00475977	0.02419	2.12835	up	noncoding	ENST00000562716	RP11-114H24.6	GENCODE	483	chr15	+	78285746	78287631		TACTGTGTCTGTCCCAGGACTCGGAAGTATTACAGTTCCAAAACGTAACTTGAAGGTCAG	natural antisense	NM_015079	TBC1D2B	TBC1 domain family member 2B isoform b	-	78287326	78369994	49.917	40.4722	5.96462	4.87489	49.8275	54.2245	45.6991	39.2336	32.7563	49.4267	6.07345	5.74252	6.0779	4.77297	4.66921	5.18248
ASHGA5P022787	0.00475977	0.02419	2.12835	up	noncoding	ENST00000562716	RP11-114H24.6	GENCODE	483	chr15	+	78285746	78287631		TACTGTGTCTGTCCCAGGACTCGGAAGTATTACAGTTCCAAAACGTAACTTGAAGGTCAG	natural antisense	NM_144572	TBC1D2B	TBC1 domain family member 2B isoform a	-	78287326	78369994	49.917	40.4722	5.96462	4.87489	49.8275	54.2245	45.6991	39.2336	32.7563	49.4267	6.07345	5.74252	6.0779	4.77297	4.66921	5.18248
ASHGA5P053079	0.00908034	0.0364509	2.58416	up	noncoding	ENST00000450436	SEPT7P2	GENCODE	601	chr7	-	45797709	45808584	NR_024271, uc003tnf.4	TTCCAGGATCGCGCATTAGCGGACGCTGGCTACGGGTGGCCGGGCGGGATGTAACCGGCT	intergenic							13.9551	10.4864	4.25837	2.88867	13.5859	17.826	10.4533	9.56006	5.93518	15.964	4.35589	4.29711	4.12209	2.69785	2.52682	3.44134
ASHGA5P039815	0.000439847	0.00646152	3.88366	up	noncoding	uc001edc.1	BC047723	UCSC_knowngene	1208	chr1	+	113499036	113542118	ENST00000435800	GCTCCCTGGTAAGCAAGATTATGCTATAATCTTAAAATAGGCTCACACCTGTAATCCCAG	natural antisense	ENST00000429288	SLC16A1	solute carrier family 16, member 1 (monocarboxylic acid transporter 1) [Source:HGNC Symbol;Acc:10922]	-	113460381	113499635	1562.84	461.47	10.545	8.58756	1342.5	2259.97	1086.06	464.215	373.659	546.535	10.5046	10.793	10.3374	8.53802	8.39707	8.8276
ASHGA5P015237	0.000262645	0.00500246	2.44368	up	noncoding	ENST00000418292	CTA-292E10.6	GENCODE	208	chr22	+	29196691	29235021		CTGGCCAAAGCGCTTGGATGTCCCCCTTTCTCTGTTTATGGAGTTCCTTACTATATAATC	bidirectional	NM_001079539	XBP1	X-box-binding protein 1 isoform XBP1(S)	-	29190547	29196560	1071.27	510.783	10.0424	8.75336	1100.34	1217.02	896.454	520.67	504.943	506.737	10.2116	9.87909	10.0366	8.70888	8.84326	8.70794
ASHGA5P015237	0.000262645	0.00500246	2.44368	up	noncoding	ENST00000418292	CTA-292E10.6	GENCODE	208	chr22	+	29196691	29235021		CTGGCCAAAGCGCTTGGATGTCCCCCTTTCTCTGTTTATGGAGTTCCTTACTATATAATC	bidirectional	NM_005080	XBP1	X-box-binding protein 1 isoform XBP1(U)	-	29190547	29196560	1071.27	510.783	10.0424	8.75336	1100.34	1217.02	896.454	520.67	504.943	506.737	10.2116	9.87909	10.0366	8.70888	8.84326	8.70794
ASHGA5P031704	0.00595276	0.0278138	2.00166	up	noncoding	uc010vft.2	IGH	UCSC_knowngene	91	chr16	+	32077385	32077476	uc002ect.3, uc010vga.2, uc021thc.1, uc021thd.1, uc021thk.1	AGGAGGCTTGGTACAGCCTGGGGGGTCCCTGAGACTCTCCTGTGCAGCCTCTGGATTCAC	intergenic							116.626	86.7674	7.06492	6.06373	125.356	120.955	103.566	91.8996	89.5876	78.8151	7.29373	6.75729	7.14375	6.07047	6.23093	5.8898
ASHGA5P015959	0.000136288	0.00374918	3.39981	up	noncoding	uc002gty.3	USP32P2	UCSC_knowngene	4694	chr17	-	18414575	18445234		GAGATTTAAGAGTTTGGAGAATCTGATGATTATGTGTCTCAGGGATGATCTCCTCGTGGA	intron sense-overlapping	ENST00000392176	FAM106A	family with sequence similarity 106, member A [Source:HGNC Symbol;Acc:25682]	-	18427879	18430160	49.1861	25.0986	5.9202	4.15475	40.3164	63.2837	43.9583	23.3118	25.8428	26.1411	5.79673	5.9375	6.02637	3.95671	4.30338	4.20414
ASHGA5P037778	0.000352345	0.00580255	5.59426	up	noncoding	ENST00000414726	AP000525.10	pseudogene	313	chr22	+	16171459	16172116		TTTGAAGGTGCTGTGATTCAAACTGTCAGCGAGATAAGGCAGCAGATCAAGAAAGCACTC								23.3513	5.12833	4.86301	2.37907	19.7732	36.6573	13.6233	5	5	5.38498	4.86413	5.23899	4.48593	2.34074	2.34646	2.45
ASHGA5P058027	0.031045	0.0803899	2.63272	up	noncoding	TCONS_00025502	XLOC_012315	LincRNAs identified by Cabili et al	491	chr17	+	75262915	75266597		GCTAAAGAAGAATGCAGGCGTACATGGAAACCGCACATCAGGAGCGGATGGCGAAAGACT	intergenic							9.81633	5	3.73988	2.34333	6.09541	8.45321	14.9004	5	5	5	3.30873	3.31458	4.59632	2.34074	2.34646	2.34278
ASHGA5P021481	4.8147e-05	0.00244383	13.82	up	noncoding	ENST00000533179	AC005152.2	GENCODE	460	chr17	-	70086895	70115664		TCTTCATAAGGTTCATCTCAAAGATCTCTCTTTGCATAATGTGTGTGTGGACCTGCCTAC	intergenic							747.319	70.1017	9.5234	5.73471	620.59	806.655	814.713	73.9412	70.484	65.8799	9.39348	9.27862	9.89811	5.73183	5.85673	5.61559
ASHGA5P020228	0.00078733	0.00859725	2.79477	up	noncoding	ENST00000509993	CTC-210G5.1	GENCODE	783	chr5	-	121772453	121804762		AAAGGGCAAAAGATGAGTGCCAGCCCGGCTGGAGGCTGACAGGCTTCCAAGAACCTGAAT	natural antisense	NM_001242935	SNCAIP	synphilin-1 isoform 1A	+	121647819	121799794	26.7848	18.5118	5.15625	3.67352	24.3845	28.8828	27.0872	21.6777	16.3754	17.4822	5.13624	4.92898	5.40353	3.84457	3.58791	3.58809
ASHGA5P020228	0.00078733	0.00859725	2.79477	up	noncoding	ENST00000509993	CTC-210G5.1	GENCODE	783	chr5	-	121772453	121804762		AAAGGGCAAAAGATGAGTGCCAGCCCGGCTGGAGGCTGACAGGCTTCCAAGAACCTGAAT	natural antisense	NM_005460	SNCAIP	synphilin-1 isoform 1	+	121647819	121799794	26.7848	18.5118	5.15625	3.67352	24.3845	28.8828	27.0872	21.6777	16.3754	17.4822	5.13624	4.92898	5.40353	3.84457	3.58791	3.58809
ASHGA5P039732	0.000642869	0.00776802	2.27923	up	noncoding	TCONS_00023008	XLOC_010856	LincRNAs identified by Cabili et al	358	chr14	+	66592482	66593873		CCTTCTTCCCCTCTCTTCATGTTCACAGCATATCTTATTATTGTTAATATTGGAAGTCAA	intergenic							4529.9	2296.46	12.1132	10.9246	4309.79	5389.16	3890.74	2571.65	2345.41	1972.32	12.1205	12.0803	12.1388	11.0424	11.0505	10.681
ASHGA5P031068	0.00202632	0.014522	2.02341	up	noncoding	ENST00000566537	AC009133.15	GENCODE	547	chr16	-	29817816	29819053		AACTCCTTGGCGCACAGAGCGCAGATGTAGGGCCCCTTGCTCTTTGTCTTCTTCTCCAAG	natural antisense	NM_001042539	MAZ	myc-associated zinc finger protein isoform 2	+	29817854	29822504	315.071	200.8	8.35693	7.34014	312.228	356.086	276.901	202.174	210.65	189.576	8.47548	8.166	8.42932	7.27314	7.54527	7.20201
ASHGA5P031068	0.00202632	0.014522	2.02341	up	noncoding	ENST00000566537	AC009133.15	GENCODE	547	chr16	-	29817816	29819053		AACTCCTTGGCGCACAGAGCGCAGATGTAGGGCCCCTTGCTCTTTGTCTTCTTCTCCAAG	natural antisense	NM_002383	MAZ	myc-associated zinc finger protein isoform 1	+	29817854	29822504	315.071	200.8	8.35693	7.34014	312.228	356.086	276.901	202.174	210.65	189.576	8.47548	8.166	8.42932	7.27314	7.54527	7.20201
ASHGA5P032773	4.48238e-05	0.00238725	10.0025	up	noncoding	ENST00000441700	AC091153.4	GENCODE	387	chr17	+	4578673	4600129		GAAAGTGAGAGCCAGAGAGAGACAGAAACAGGGAATGACCATTTACATATGTACACATAG	intronic antisense	NM_014389	PELP1	proline-, glutamic acid- and leucine-rich protein 1	-	4574678	4607632	45.1096	5.28716	5.74897	2.42667	31.4672	69.2936	34.568	5	5.04715	5.81433	5.46875	6.05256	5.72559	2.34074	2.45625	2.48303
ASHGA5P049432	7.26574e-06	0.00124427	3.72557	up	noncoding	ENST00000577064	RP13-580F15.2	GENCODE	575	chr17	-	4385442	4386879		TTAGGTCCAGGTAGGCTGGCCCCTTCCTCCTCTCCCAGGAACCCCAACCTGCTGGGCCCA	intronic antisense	NM_182538	SPNS3	protein spinster homolog 3	+	4337218	4391499	26600.2	8667.91	14.7761	12.8786	26673.3	28237.8	24889.5	9145.71	8682.27	8175.75	14.7787	14.6761	14.8734	12.9042	12.9072	12.8245
ASHGA5P029306	0.00341415	0.0196298	2.09362	up	noncoding	TCONS_00008392	XLOC_003842	LincRNAs identified by Cabili et al	966	chr4	+	190598740	190600367		AATGAAGAAGCCAGAACACATGAACACGAAACCAGCCAACCAACAAACACAAGCAGCATG	intergenic							23.5642	21.1029	4.93865	3.87265	22.0108	31.7496	16.9321	18.4667	20.8995	23.9425	4.9978	5.05316	4.76498	3.58347	3.97039	4.06409
ASHGA5P041875	0.000409934	0.00622722	3.50693	up	noncoding	ENST00000453790	RP11-79N23.1	GENCODE	850	chr6	-	53605546	53611820		TATAGAAACTTAATTACATATAGAAACTAAGTACAGGACTTTGTTTATTGACTATGTATT	intergenic							14.4954	6.62783	4.31383	2.50362	16.2616	16.811	10.4136	7.53621	5	7.34729	4.60181	4.22235	4.11733	2.57355	2.34646	2.59085
ASHGA5P055965	0.00856496	0.035061	2.27118	up	noncoding	ENST00000556705	RP11-85K15.2	GENCODE	580	chr14	-	35432913	35451738		GCTCACTGACAGAATAAAGGTACCTTTTAACTTAGTCAAATCTCTTTTGCATTGTTTTCC	intronic antisense	ENST00000556994	SRP54	signal recognition particle 54kDa [Source:HGNC Symbol;Acc:11301]	+	35451162	35498773	1802.13	926.49	10.805	9.6216	1915.62	1801.3	1689.48	876.223	1091.04	812.206	10.9949	10.455	10.9653	9.49069	9.96341	9.4107
ASHGA5P038499	0.0022456	0.0154378	3.42883	up	noncoding	ENST00000430605	NEGR1-AS1	GENCODE	213	chr1	+	71867529	71873407		GGAAAGCATGTATTTGTTTGCTAAATTGCTCTCTTTCCACCAGTGATATCAATTCTGAAA	intronic antisense	NM_173808	NEGR1	neuronal growth regulator 1 precursor	-	71868624	72748277	190.287	78.7171	7.69054	5.91282	221.124	182.352	167.387	81.6187	85.3883	69.1443	8.01868	7.27757	7.77536	5.88821	6.15498	5.69527
ASHGA5P051484	7.2016e-06	0.00124427	5.5095	up	noncoding	ENST00000431621	BX004987.3	GENCODE	2609	chr1	+	143355261	143379903	ENST00000377477, ENST00000428576, ENST00000431648, ENST00000439302, ENST00000451663, ENST00000583348, NM_001012419, NM_001098805, NR_003366, NR_027995, NR_040113, uc001ejc.3, uc011abu.2	AAAGGGAAACAATATAAGAAAGAAGTTGAAGCAAAACAACTTGAACCAACTATTCAATCA	intergenic							21.2969	5	4.80525	2.34333	17.3994	29.6805	16.8108	5	5	5	4.69637	4.96502	4.75436	2.34074	2.34646	2.34278
ASHGA5P032666	0.000354855	0.00581604	2.5242	up	noncoding	uc002jrt.3	AX747521	UCSC_knowngene	2016	chr17	-	74492855	74494871		TTCCCTCTCCCAGTGGGTCTCCCCAGGTTGTCAGCTCCATTTAGTCATAAGAAGATCTGG	intron sense-overlapping	NM_024599	RHBDF2	inactive rhomboid protein 2 isoform 1	-	74466974	74497509	8688.05	3905.08	13.0579	11.722	9121.44	10432.6	6510.1	3933.15	4181.18	3600.91	13.1877	13.105	12.8809	11.6888	11.8661	11.6112
ASHGA5P037927	0.000212094	0.0045204	2.79202	up	noncoding	ENST00000432130	RP1-56J10.8	GENCODE	249	chr22	+	30994295	31002674		GGCCTGGCTGGTCTGGGGCCAGCGGCACCCACCCTCCCCTCAATTGCCCAACTCCCCCCC	intronic antisense	ENST00000402281	PES1	pescadillo ribosomal biogenesis factor 1 [Source:HGNC Symbol;Acc:8848]	-	30972614	31003070	11393.9	4718.79	13.4663	11.9849	12086.8	11442.9	10652	4854.48	4698.58	4603.3	13.5762	13.2406	13.5819	11.9638	12.0328	11.9582
ASHGA5P037927	0.000212094	0.0045204	2.79202	up	noncoding	ENST00000432130	RP1-56J10.8	GENCODE	249	chr22	+	30994295	31002674		GGCCTGGCTGGTCTGGGGCCAGCGGCACCCACCCTCCCCTCAATTGCCCAACTCCCCCCC	intronic antisense	ENST00000405677	PES1	pescadillo ribosomal biogenesis factor 1 [Source:HGNC Symbol;Acc:8848]	-	30972618	31002975	11393.9	4718.79	13.4663	11.9849	12086.8	11442.9	10652	4854.48	4698.58	4603.3	13.5762	13.2406	13.5819	11.9638	12.0328	11.9582
ASHGA5P054391	0.0193458	0.058596	2.3516	up	noncoding	NR_046284	LOC100128511	RefSeq	529	chr10	+	21463230	21463852		CGACTGTGCGGCCTGGGGAGTGAGCCTCGCGCCACCGCCGCTGCAGGCCGGGGAGCCCAG	bidirectional	NM_001173484	NEBL	nebulette isoform 3	-	21068902	21463116	108.061	71.7964	6.97074	5.73709	115.253	114.233	94.6963	60.7403	95.1777	59.4712	7.18775	6.68444	7.04003	5.4331	6.31616	5.46202
ASHGA5P054391	0.0193458	0.058596	2.3516	up	noncoding	NR_046284	LOC100128511	RefSeq	529	chr10	+	21463230	21463852		CGACTGTGCGGCCTGGGGAGTGAGCCTCGCGCCACCGCCGCTGCAGGCCGGGGAGCCCAG	bidirectional	NM_213569	NEBL	nebulette isoform 2	-	21068902	21463116	108.061	71.7964	6.97074	5.73709	115.253	114.233	94.6963	60.7403	95.1777	59.4712	7.18775	6.68444	7.04003	5.4331	6.31616	5.46202
ASHGA5P043655	0.000463092	0.00662028	7.77275	up	noncoding	ENST00000423781	AC004870.4	GENCODE	706	chr7	+	47009313	47067079		ACCAGTACTGAGTGATGAAGAACATTTTGCTAAGTTGTTCTATCGTGGTCCTTGCTTAAG	intergenic							96.9327	21.0501	6.82273	3.8643	88.242	98.0594	104.497	22.5155	24.1809	16.4539	6.81789	6.49355	7.15674	3.90259	4.20089	3.48942
ASHGA5P000589	0.000113599	0.00345962	7.36616	up	noncoding	DA962001		LincRNAs identified by Khalil et al	556	chr15	-	70827525	70828126		TTCAGTTTTCTCTTCTCTGCTCAGTAAGCTCAGTTTAGCTCTGTGTGTGTGCGTGTGTCT	intergenic							1982.61	321.626	10.9306	8.0497	1685.22	2142.36	2120.23	362.852	305.234	296.793	10.8099	10.7112	11.2707	8.1636	8.09781	7.88768
ASHGA5P043181	0.000171163	0.00410615	9.55988	up	noncoding	ENST00000471553	RP5-1121E10.2	GENCODE	578	chr7	-	89748612	89752204		CACTGAAAGACTCAGAGCCATTTAACCATATAACCACTGCAGAATCTTTAACTTCTTTTT	intergenic							100.253	18.0892	6.86457	3.60757	105.105	113.865	81.7877	16.6169	14.2187	23.432	7.06357	6.68021	6.84992	3.42037	3.36972	4.03263
ASHGA5P031126	3.2961e-05	0.00206074	4.09255	up	noncoding	uc002edq.3	BC041879	UCSC_knowngene	2514	chr16	-	33298267	33319211	uc002edb.3	AAATTTCTTACCCTGGGCCATCTGTCCTGTGTGTCTGTCCTCCTTGTGATCAGTTATTTG	intergenic							3547.81	989.743	11.7608	9.72782	3554.04	3847.28	3242.11	1063.54	927.109	978.58	11.8404	11.5735	11.8685	9.76953	9.74522	9.6687
ASHGA5P015598	5.81557e-05	0.00267901	2.86864	up	noncoding	ENST00000421796	AC004448.5	GENCODE	540	chr17	-	19351427	19364026		ATTCCTGGAGGATGCCAAGACAGGAGGATTGCTTGATGCCAAGACAGGAGGATTGCTTGA	intergenic							428.857	186.562	8.74444	7.22407	420.032	557.569	308.968	196.781	169.445	193.459	8.87834	8.76823	8.58674	7.22916	7.21087	7.23219
ASHGA5P047318	9.99378e-06	0.00132897	10.6839	up	noncoding	ENST00000426922	RP11-478H13.3	GENCODE	406	chr10	+	29095875	29097148		TTGAATTAGTGTTACCCACTAACAGGATGAGGAATTCCCACTCCACAAGCTGACTTTTTT	intergenic							54.9825	7.67202	6.02977	2.61241	44.175	79.8313	40.9413	10.1504	5.86699	6.99864	5.91674	6.23419	5.93838	2.74593	2.52152	2.56977
ASHGA5P045824	0.000242049	0.00478918	6.78244	up	noncoding	ENST00000465736	ANKRD19P	GENCODE	959	chr9	+	95571849	95587136	ENST00000460854, NR_026868, uc004asr.4	CTGAGCAGAAGATGCCAGATCAACATATATGATAGACTAAACAGGACACCTTTAATGAAG	intergenic							65.9897	17.0518	6.28409	3.52229	52.9584	90.6322	54.3786	22.4398	15.4864	13.2291	6.15002	6.39499	6.30726	3.89754	3.50037	3.16895
ASHGA5P055955	0.0210785	0.062125	3.74442	up	noncoding	ENST00000555421	RP11-829H16.3	GENCODE	431	chr14	-	31353670	31354394		GGGAGAATTAAAAAGGTAAAATAAGCAACATTACATGCCTTAAAAAACAGTTTTAAAACC	natural antisense	NM_001135058	COCH	cochlin precursor	+	31343740	31359822	24.3669	12.1892	4.94291	3.03816	18.46	16.671	37.9696	10.338	10.6935	15.5361	4.77036	4.21115	5.8472	2.76171	2.94848	3.4043
ASHGA5P055955	0.0210785	0.062125	3.74442	up	noncoding	ENST00000555421	RP11-829H16.3	GENCODE	431	chr14	-	31353670	31354394		GGGAGAATTAAAAAGGTAAAATAAGCAACATTACATGCCTTAAAAAACAGTTTTAAAACC	natural antisense	NM_004086	COCH	cochlin precursor	+	31343740	31359822	24.3669	12.1892	4.94291	3.03816	18.46	16.671	37.9696	10.338	10.6935	15.5361	4.77036	4.21115	5.8472	2.76171	2.94848	3.4043
ASHGA5P037493	0.000697689	0.00803055	2.89049	up	noncoding	TCONS_00024509	XLOC_011826	LincRNAs identified by Cabili et al	298	chr16	+	88219138	88219657	TCONS_00024508, TCONS_00024510, TCONS_00024904, TCONS_00024905	TGAATATAGTATATGCACACACACACTTATGTGCGCAGACCCACAGACACACACATTCAC	intergenic							72.3224	40.5048	6.4142	4.88289	67.2389	94.4398	55.2886	48.776	39.482	33.2563	6.46925	6.44562	6.32773	5.10338	4.96361	4.58167
ASHGA5P014639	0.0294131	0.0775659	2.06297	up	noncoding	ENST00000412102	LINC00479	GENCODE	2033	chr21	-	43131679	43135935		TGTACCAAATACCACAGATGGAGGCGTGACACAGACTGTCCACTGCAGAGACCATGGACG	intergenic							11.4139	11.2359	3.98805	2.94332	15.5889	10.2282	8.4248	12.3585	12.2414	9.10773	4.54142	3.57518	3.84753	2.98694	3.1398	2.70323
ASHGA5P014919	0.0116402	0.0426095	2.16927	up	noncoding	ENST00000414744	SPAG5-AS1	GENCODE	2141	chr17	+	26925807	26944393		AACCTGTTGAAGAATGGACTTAGAGGAAACCGAAGAAATCCCAAGCCACACCAAACAGGA	intronic antisense	NM_001174103	SGK494	uncharacterized serine/threonine-protein kinase SgK494	-	26934981	26941211	11.568	10.7439	3.99278	2.87557	7.31085	14.5647	12.8286	11.1813	10.2059	10.8446	3.53432	4.03546	4.40855	2.85031	2.89005	2.88635
ASHGA5P014919	0.0116402	0.0426095	2.16927	up	noncoding	ENST00000414744	SPAG5-AS1	GENCODE	2141	chr17	+	26925807	26944393		AACCTGTTGAAGAATGGACTTAGAGGAAACCGAAGAAATCCCAAGCCACACCAAACAGGA	natural antisense	NM_006461	SPAG5	sperm-associated antigen 5	-	26904582	26926056	11.568	10.7439	3.99278	2.87557	7.31085	14.5647	12.8286	11.1813	10.2059	10.8446	3.53432	4.03546	4.40855	2.85031	2.89005	2.88635
ASHGA5P014919	0.0116402	0.0426095	2.16927	up	noncoding	ENST00000414744	SPAG5-AS1	GENCODE	2141	chr17	+	26925807	26944393		AACCTGTTGAAGAATGGACTTAGAGGAAACCGAAGAAATCCCAAGCCACACCAAACAGGA	natural antisense	NM_014680	KIAA0100	UPF0378 protein KIAA0100 precursor	-	26941457	26972177	11.568	10.7439	3.99278	2.87557	7.31085	14.5647	12.8286	11.1813	10.2059	10.8446	3.53432	4.03546	4.40855	2.85031	2.89005	2.88635
ASHGA5P029706	0.000163768	0.00408457	7.05546	up	noncoding	ENST00000556926	RP11-356K23.2	GENCODE	458	chr14	+	89821403	89822915		ACAATTGTAACCCTGTAAAGCTGATGAGATATTAAAACAAGACAAAAACTGAAAACGAAA	intronic antisense	NM_001085471	FOXN3	forkhead box protein N3 isoform 1	-	89622515	90085494	5265.75	864.74	12.3413	9.52255	5218.12	5526.28	5052.85	849.215	997.186	747.82	12.407	12.1154	12.5016	9.43921	9.84883	9.27961
ASHGA5P029706	0.000163768	0.00408457	7.05546	up	noncoding	ENST00000556926	RP11-356K23.2	GENCODE	458	chr14	+	89821403	89822915		ACAATTGTAACCCTGTAAAGCTGATGAGATATTAAAACAAGACAAAAACTGAAAACGAAA	intronic antisense	NM_005197	FOXN3	forkhead box protein N3 isoform 2	-	89622515	89883454	5265.75	864.74	12.3413	9.52255	5218.12	5526.28	5052.85	849.215	997.186	747.82	12.407	12.1154	12.5016	9.43921	9.84883	9.27961
ASHGA5P027893	0.000920141	0.0093324	3.25873	up	noncoding	AK091319R		LincRNAs identified by Khalil et al	2297	chrX	-	102851535	102853832		TGTGCTCCATTTTGAAGATAAAAAGACAGCTGGTCCTGGACCCTAAGTCTGTGGACTCTA	intergenic							196.918	85.3108	7.7377	6.03339	195.116	198.035	197.603	87.9818	74.6507	93.2999	7.84879	7.37632	7.98797	6.00678	5.95064	6.14274
ASHGA5P019315	0.000157108	0.00400268	5.78761	up	noncoding	ENST00000478005	TIPARP-AS1	GENCODE	554	chr3	-	156389652	156391722		GAAGTCAGTAAAACTAGGAGCTAAGAGAGTAATAACAGGATGGAGATGGAGTTTCATGAC	intronic antisense	ENST00000486483	TIPARP	TCDD-inducible poly(ADP-ribose) polymerase [Source:HGNC Symbol;Acc:23696]	+	156391023	156422928	25.2543	6.8166	5.06436	2.53139	26.95	28.913	19.9	5.05899	5	10.3908	5.27154	4.93035	4.99118	2.4203	2.34646	2.8274
ASHGA5P019652	0.000276874	0.00514269	4.55742	up	noncoding	uc003knd.3	FLJ35946	UCSC_knowngene	1861	chr5	-	98105321	98108787		CGAGGCTCAGATTATTTAAATTTTCCACAAATTTCTACGGATTAATTCAATGGCAGCTCA	natural antisense	NM_001012761	RGMB	RGM domain family member B	+	98104998	98132198	18.0566	5.59103	4.6237	2.43549	20.8212	18.1252	15.2234	5.57552	5	6.19755	4.92878	4.31955	4.62278	2.44675	2.34646	2.51325
ASHGA5P056887	0.0306142	0.0796204	2.11034	up	noncoding	TCONS_00010260	XLOC_004725	LincRNAs identified by Cabili et al	818	chr5	-	6705617	6710411		ATCTGTTACACAGGCCTAAAGCAACAACCAGAAGCCTTCCTGGGTGTTTACATTACAGCA	intergenic							30.0905	26.4763	5.28743	4.20996	36.9006	30.1353	23.2354	27.7271	32.2266	19.4751	5.67943	4.98907	5.19379	4.2309	4.64497	3.754
ASHGA5P057224	0.000380486	0.00598505	3.33241	up	noncoding	TCONS_00014761	XLOC_006844	LincRNAs identified by Cabili et al	1184	chr8	+	74791942	74816962		CCCTTCCAAGGGTGCCACCACAGGTAACCATCAGAGAACACACTGCTATTTTCAAATAAA	intergenic							1090.5	390.127	10.0803	8.34377	1091.64	1159.9	1019.97	378.06	398.166	394.156	10.1994	9.8058	10.2358	8.22608	8.48481	8.32043
ASHGA5P036696	9.65874e-05	0.00324692	3.64838	up	noncoding	TCONS_00026503	XLOC_012829	LincRNAs identified by Cabili et al	414	chr18	-	39766365	39805980		AATATCAGCTCCAAATGTCTTGGCCCATCTTTCCGTGTCCCCCTACCCTACACAGCCTCT	intergenic							28820.9	9688.9	14.9076	13.0403	30978.1	28670.7	26814	10339.8	10001.4	8725.47	15.0053	14.704	15.0133	13.0892	13.1142	12.9175
ASHGA5P021297	0.00137279	0.0115858	4.1514	up	noncoding	NR_046413	POLD4	RefSeq	1515	chr11	-	67118235	67121067		TCCTCTCTCGGGGAGGAGCCCCAGCCCCGCGACGAGGAGGAAGCGGAGCTGGAGCTGCTG	exon sense-overlapping	NM_001256870	POLD4	DNA polymerase delta subunit 4 isoform 2	-	67118235	67121067	35.7572	16.7236	5.52607	3.47248	34.6182	42.7613	29.8921	15.8157	11.9713	22.3839	5.59408	5.4443	5.53984	3.34915	3.10479	3.96348
ASHGA5P021297	0.00137279	0.0115858	4.1514	up	noncoding	NR_046413	POLD4	RefSeq	1515	chr11	-	67118235	67121067		TCCTCTCTCGGGGAGGAGCCCCAGCCCCGCGACGAGGAGGAAGCGGAGCTGGAGCTGCTG	exon sense-overlapping	NM_021173	POLD4	DNA polymerase delta subunit 4 isoform 1	-	67118235	67121067	35.7572	16.7236	5.52607	3.47248	34.6182	42.7613	29.8921	15.8157	11.9713	22.3839	5.59408	5.4443	5.53984	3.34915	3.10479	3.96348
ASHGA5P054394	0.0390053	0.0944743	2.50146	up	noncoding	ENST00000443921	PRINS	GENCODE	2195	chr10	+	24536050	24544975		CATTGTATAAAACATTCACTTTAAATGTATACCGAAATGTCCTTTAGGCCGGGCGCAGTG	intron sense-overlapping	NM_001098500	KIAA1217	sickle tail protein homolog isoform 2	+	23983674	24836772	29.4296	20.5524	5.09412	3.77135	23.0764	50.5596	14.6528	20.3331	13.1747	28.1495	5.06184	5.64819	4.57233	3.73937	3.2553	4.31937
ASHGA5P054394	0.0390053	0.0944743	2.50146	up	noncoding	ENST00000443921	PRINS	GENCODE	2195	chr10	+	24536050	24544975		CATTGTATAAAACATTCACTTTAAATGTATACCGAAATGTCCTTTAGGCCGGGCGCAGTG	intron sense-overlapping	NM_001098501	KIAA1217	sickle tail protein homolog isoform 3	+	24497719	24836772	29.4296	20.5524	5.09412	3.77135	23.0764	50.5596	14.6528	20.3331	13.1747	28.1495	5.06184	5.64819	4.57233	3.73937	3.2553	4.31937
ASHGA5P054394	0.0390053	0.0944743	2.50146	up	noncoding	ENST00000443921	PRINS	GENCODE	2195	chr10	+	24536050	24544975		CATTGTATAAAACATTCACTTTAAATGTATACCGAAATGTCCTTTAGGCCGGGCGCAGTG	intron sense-overlapping	NM_019590	KIAA1217	sickle tail protein homolog isoform 1	+	24497719	24836772	29.4296	20.5524	5.09412	3.77135	23.0764	50.5596	14.6528	20.3331	13.1747	28.1495	5.06184	5.64819	4.57233	3.73937	3.2553	4.31937
ASHGA5P051501	0.0349782	0.0874632	2.30106	up	noncoding	ENST00000467933	SRGAP2B	GENCODE	1334	chr1	+	143913614	144094424		TATGGGCCCCATCGGTCGATAGAAAACGGGCGGTGATTGGTAAAGGGGTGGGCTCTACTT	bidirectional	NM_207418	FAM72D	protein FAM72D	-	143896451	143913143	21.106	17.1704	4.76177	3.55947	12.117	22.3506	28.8505	17.8467	17.1379	16.5266	4.20584	4.59062	5.48884	3.52651	3.65728	3.49463
ASHGA5P053097	0.00011374	0.00345962	4.88962	up	noncoding	ENST00000419314	CCT6P3	GENCODE	3702	chr7	+	64498731	64535091		CAGGACTTGTATATGAGTATACATTGGTAAGTGTATTTTCTTCCTGAGGGTAATAGAACT	intergenic							211.449	59.3041	7.76182	5.4721	170.222	321.622	142.505	64.3731	50.9115	62.6277	7.68218	8.03335	7.56993	5.52383	5.35119	5.54128
ASHGA5P053008	0.00913228	0.0366094	2.30315	up	noncoding	ENST00000523790	HOXA-AS4	GENCODE	1129	chr7	+	27208712	27211384		AGCCAACCTAACCCTACCTGCTGTGACCAGGTGGAGGTGTGTGGTGGAAGGGGAAAGCCG	natural antisense	NM_018951	HOXA10	homeobox protein Hox-A10	-	27210209	27213955	115.593	74.5243	7.01253	5.80892	89.837	155.936	101.005	84.6848	84.135	54.7531	6.84151	7.08073	7.11536	5.95105	6.13436	5.34136
ASHGA5P055056	0.000540207	0.00710203	5.41602	up	noncoding	ENST00000528083	RP11-727A23.5	GENCODE	547	chr11	-	82903314	82904705	uc009yvh.3	AACAGAATTCAGGACAACCCTTTATTATTAAGGTGATCACTGGCTCAGTCGGACTGGGGT	bidirectional	NM_182603	ANKRD42	ankyrin repeat domain-containing protein 42	+	82905290	82960013	49.4856	16.7644	5.92373	3.4865	48.8589	63.749	35.8488	16.4166	12.2486	21.628	6.04967	5.9475	5.77404	3.40266	3.14124	3.9156
ASHGA5P045797	0.000157587	0.0040097	2.14698	up	noncoding	NR_049794	LOC100506834	RefSeq	4388	chr9	+	89563612	89616948		CCCTTATTATTTAAATCTCAGCAGAATGTGAAGTTATGTTCCCCCTTTGTATCCATTTTT	intergenic							343.243	205.364	8.47211	7.3698	339.808	400.403	289.516	212.289	192.751	211.052	8.59295	8.328	8.49538	7.34408	7.40621	7.35911
ASHGA5P015709	0.00623908	0.028663	2.18792	up	noncoding	ENST00000422826	H19	GENCODE	1796	chr11	-	2016439	2019027		TTGGCAGACACTGAGTGGGACCTCACTCCTTCCCCATCCACAGAAATGGTGCTACCCAGC	intergenic							2921.47	1531.22	11.4709	10.3413	3199.59	2759.59	2805.21	1599.84	1596.86	1396.96	11.6782	11.0863	11.6481	10.3464	10.5031	10.1744
ASHGA5P030636	0.0011836	0.0106213	2.48856	up	noncoding	uc002auv.1	AX748294	UCSC_knowngene	2433	chr15	+	72908150	72910583		TGCACATGTGCGCACGCACACACACACACAGCAGAAAATCTAGAAATAAACTATTTTAAT	intergenic							192.69	107.574	7.685	6.36969	153.315	263.179	161.577	126.876	106.28	89.5659	7.55442	7.76657	7.73401	6.54651	6.48117	6.08138
ASHGA5P018536	0.00029328	0.00527478	8.98309	up	noncoding	ENST00000454712	RP11-431J24.2	GENCODE	454	chrX	-	16171342	16183244		GGGAAGAGGAGTTGGATTTGGGAAGCAATGCTAAGCAGTGGAATGGACATCGACATAGAG	natural antisense	NM_005314	GRPR	gastrin-releasing peptide receptor	+	16141423	16171641	40.6447	5.6814	5.58696	2.41975	23.6494	64.258	34.0268	5	5	7.04421	5.09452	5.96021	5.70614	2.34074	2.34646	2.57203
ASHGA5P032890	0.000699966	0.00804736	6.76626	up	noncoding	ENST00000583662	RP11-524F11.2	GENCODE	425	chr17	+	17494741	17513799		TAAAATCAATATTGCCGAGGCCTCCGCAGCAGTCAGGCCCTGCCACCGAGCTGTTCGTTA	natural antisense	NM_001267551	PEMT	phosphatidylethanolamine N-methyltransferase isoform 1	-	17408876	17495017	453.769	88.4908	8.84422	6.08586	486.185	389.338	485.785	100.14	85.6054	79.7272	9.0661	8.29317	9.17338	6.19559	6.15776	5.90421
ASHGA5P032890	0.000699966	0.00804736	6.76626	up	noncoding	ENST00000583662	RP11-524F11.2	GENCODE	425	chr17	+	17494741	17513799		TAAAATCAATATTGCCGAGGCCTCCGCAGCAGTCAGGCCCTGCCACCGAGCTGTTCGTTA	natural antisense	NM_001267552	PEMT	phosphatidylethanolamine N-methyltransferase isoform 3	-	17408876	17495017	453.769	88.4908	8.84422	6.08586	486.185	389.338	485.785	100.14	85.6054	79.7272	9.0661	8.29317	9.17338	6.19559	6.15776	5.90421
ASHGA5P032890	0.000699966	0.00804736	6.76626	up	noncoding	ENST00000583662	RP11-524F11.2	GENCODE	425	chr17	+	17494741	17513799		TAAAATCAATATTGCCGAGGCCTCCGCAGCAGTCAGGCCCTGCCACCGAGCTGTTCGTTA	natural antisense	NM_148172	PEMT	phosphatidylethanolamine N-methyltransferase isoform 1	-	17408876	17495017	453.769	88.4908	8.84422	6.08586	486.185	389.338	485.785	100.14	85.6054	79.7272	9.0661	8.29317	9.17338	6.19559	6.15776	5.90421
ASHGA5P019742	0.00249836	0.0164612	3.09666	up	noncoding	uc011ckd.2	NBLA00301	UCSC_knowngene	4252	chr4	+	174451608	174462981	ENST00000514673, ENST00000515310	ACTCCAGAAAGACAAACTGCAGATTGGCCAAGCTGCCTGAAGACCCAGCCCGACAGCGAT	bidirectional	NM_021973	HAND2	heart- and neural crest derivatives-expressed protein 2	-	174447651	174451378	51.3716	28.4644	5.97736	4.34664	65.1566	51.8504	37.1077	30.3291	24.1529	30.9112	6.42654	5.68297	5.82255	4.37571	4.1988	4.46542
ASHGA5P057826	1.3107e-05	0.00149364	5.12284	up	noncoding	TCONS_00022301	XLOC_010670	LincRNAs identified by Cabili et al	798	chr13	-	80629410	80649189		CCATCAAGAGGACATGGTGAGAAGACAGCCATCTGCAAGCCAGAAAGAGCGCTAACCAGA	intergenic							52.3459	18.2371	6.01176	3.65482	44.6131	64.4432	47.9812	20.3402	17.4861	16.8851	5.92835	5.96456	6.14237	3.73994	3.69097	3.53354
ASHGA5P022480	3.05604e-06	0.000948742	6.42836	up	noncoding	ENST00000557784	CTD-2007A10.1	GENCODE	555	chr14	-	88100722	88121638		TAACATGGGCCCTGCCAGCTGCTGCTGCCCCCGAGACAGTAAGACCGACTCCTCCTCTTT	intergenic							7487.26	1376.28	12.8774	10.193	7558.82	8099.17	6803.8	1433.52	1327.55	1367.76	12.9319	12.7479	12.9525	10.1879	10.248	10.1431
ASHGA5P028426	0.0014674	0.0119764	2.67367	up	noncoding	ENST00000434601	LINC00422	GENCODE	1179	chr13	-	21877650	21922860		GCCTACAGCCTAAATTTTCAAAAACAAGTTAATGCCAGAATATAAACTCCGTGAAGTAAC	intergenic							52.0831	33.3644	6.02255	4.60372	49.4356	52.4997	54.314	33.1849	32.7731	34.1354	6.06306	5.69859	6.30599	4.51737	4.6706	4.6232
ASHGA5P055039	0.000270796	0.00510359	2.16295	up	noncoding	ENST00000526984	RP11-672A2.2	GENCODE	573	chr11	-	76414317	76415523		TGTATAAGGTGAGAATACCAGGAGGCTGGCATTCCATTCCTCCCTTTACTACTGTGCCTT	intergenic							450.482	259.618	8.83489	7.72189	411.622	520.438	419.386	271.85	233.591	273.412	8.84615	8.67256	8.98596	7.71397	7.69687	7.75485
ASHGA5P040738	0.00478333	0.0242416	2.15942	up	noncoding	ENST00000507521	CTC-329D1.2	GENCODE	549	chr5	-	139750475	139780952		TGAACTGGTAGAAAGAAGCAGAGAGTTATCAAAGTTTACCTCTGCCAACCTCCCAGATGC	natural antisense	NM_001258426	SLC4A9	anion exchange protein 4 isoform 3	+	139739786	139754722	218.066	137.593	7.86955	6.75891	240.034	224.167	189.997	131.846	142.062	138.87	8.13171	7.54411	7.93284	6.61205	6.93112	6.73355
ASHGA5P040738	0.00478333	0.0242416	2.15942	up	noncoding	ENST00000507521	CTC-329D1.2	GENCODE	549	chr5	-	139750475	139780952		TGAACTGGTAGAAAGAAGCAGAGAGTTATCAAAGTTTACCTCTGCCAACCTCCCAGATGC	natural antisense	NM_001258427	SLC4A9	anion exchange protein 4 isoform 4	+	139739786	139754722	218.066	137.593	7.86955	6.75891	240.034	224.167	189.997	131.846	142.062	138.87	8.13171	7.54411	7.93284	6.61205	6.93112	6.73355
ASHGA5P040738	0.00478333	0.0242416	2.15942	up	noncoding	ENST00000507521	CTC-329D1.2	GENCODE	549	chr5	-	139750475	139780952		TGAACTGGTAGAAAGAAGCAGAGAGTTATCAAAGTTTACCTCTGCCAACCTCCCAGATGC	natural antisense	NM_001258428	SLC4A9	anion exchange protein 4 isoform 1	+	139739786	139754722	218.066	137.593	7.86955	6.75891	240.034	224.167	189.997	131.846	142.062	138.87	8.13171	7.54411	7.93284	6.61205	6.93112	6.73355
ASHGA5P040738	0.00478333	0.0242416	2.15942	up	noncoding	ENST00000507521	CTC-329D1.2	GENCODE	549	chr5	-	139750475	139780952		TGAACTGGTAGAAAGAAGCAGAGAGTTATCAAAGTTTACCTCTGCCAACCTCCCAGATGC	natural antisense	NM_031467	SLC4A9	anion exchange protein 4 isoform 2	+	139739786	139754722	218.066	137.593	7.86955	6.75891	240.034	224.167	189.997	131.846	142.062	138.87	8.13171	7.54411	7.93284	6.61205	6.93112	6.73355
ASHGA5P058217	0.0491558	0.111158	2.24929	up	noncoding	TCONS_00028249	XLOC_013591	LincRNAs identified by Cabili et al	564	chr20	+	58896459	58899668		TTTCAGGAACTGCTGAAGAAAATCACCAGAAAATCATACTGGTAGCCTTCAAGTGGCCAT	intergenic							13.3221	11.171	4.09568	2.92621	19.8778	14.0076	6.08081	11.8692	10.659	10.9848	4.87007	3.98356	3.43341	2.9332	2.94426	2.90115
ASHGA5P056322	0.00397365	0.0216001	2.60198	up	noncoding	TCONS_00002468	XLOC_001009	LincRNAs identified by Cabili et al	317	chr1	-	148933290	148951501		ACTGCCAAAGAGTCTTGGAGCCTCCCTTCTGCTCCCAGAGGCTTTTCTTGCTCATGTCTC	intergenic							1811.74	805.713	10.8119	9.43226	1905.49	1726.11	1803.62	831.458	834.921	750.761	10.9879	10.3882	11.0596	9.40916	9.59969	9.28794
ASHGA5P041981	0.00032203	0.00550906	3.77515	up	noncoding	DA195606		LincRNAs identified by Khalil et al	564	chr14	+	51741818	51742382		TTAAGTTACTTGGGTTTGGCAGCTCAGTCTGTGTGTGTTAGGGTGTGTTCTTATATCATT	intergenic							508.52	168.4	8.9855	7.06897	386.716	614.867	523.977	178.56	163.343	163.296	8.76491	8.90105	9.29055	7.07592	7.15651	6.97448
ASHGA5P044396	8.62175e-05	0.00310983	3.52652	up	noncoding	ENST00000521148	RP11-100L22.2	GENCODE	496	chr8	-	93711977	93777806	ENST00000521230	GGGTGAAGAGCCCCCAATTATTTATAAAGTGTTTGCTGCCTCATTTATGAAAATAAATAG	intergenic							1220.51	411.352	10.241	8.42278	1254.41	1433.61	973.515	403.653	366.846	463.558	10.4082	10.1453	10.1695	8.32419	8.37372	8.57044
ASHGA5P054666	0.00643954	0.029298	2.66368	up	noncoding	ENST00000436715	H19	GENCODE	861	chr11	-	2016668	2017801		GCGAGAGGAGCTGAGTGGGACCTCACTCCTTCCCCATCCACAGAAATGGTGCTACCCAGC	intergenic							1936.5	832.512	10.8904	9.47701	2244.44	1736.79	1828.28	866.749	877.568	753.219	11.2009	10.3984	11.072	9.47243	9.66489	9.2937
ASHGA5P020274	0.0122249	0.0439019	3.82966	up	noncoding	ENST00000510718	IMPA1P	pseudogene	842	chr8	-	82517803	82539184		TTAAACATTTTAAGATTTCCTTTTGTAGCTGTTTCGATTGGCCTTGTTGTAAATAAGAAG								405.524	129.618	8.56477	6.62755	201.281	632.065	383.225	157.364	144.028	87.4624	7.88986	8.93459	8.86985	6.88694	6.94928	6.04643
ASHGA5P020511	0.00141807	0.0117738	3.82468	up	noncoding	ENST00000514992	AC005562.2	pseudogene	481	chr17	+	28927882	28942998	ENST00000579301	CCAGGCGCATGAAATCTTTAACATGTATATTGAAAAGTCTGATTCAGTTACAATCAGTGT								15.219	5	4.27867	2.34333	9.73282	25.0503	10.8738	5	5	5	3.91432	4.74801	4.17367	2.34074	2.34646	2.34278
ASHGA5P048789	0.00246901	0.0163334	3.43459	up	noncoding	ENST00000443076	RP5-1166H10.2	GENCODE	454	chr1	+	31198566	31199211		TATAAACCACCCAGGGTCACACAAGGGCCATCCACGGTGACCAGCGGTGAGAAACGCAAT	intergenic							15.5202	7.87194	4.40148	2.62135	10.9819	16.6973	18.8814	9.37607	6.6258	7.61396	4.07437	4.21404	4.91604	2.68475	2.57276	2.60654
ASHGA5P026800	8.93111e-06	0.00130923	8.81421	up	noncoding	ENST00000424313	AP000997.1	GENCODE	479	chr11	+	115498782	115500461		GCTTCCCTTGCTCCTGAACTTGAGCCTCTGATTCCCTCTCCTGTTGGAGGCTTTAACACG	intergenic							12577.4	1655.89	13.5952	10.4554	12288.7	15570.2	9873.4	1838.86	1623.89	1504.94	13.6116	13.7117	13.4624	10.5471	10.5286	10.2904
ASHGA5P021301	0.00027093	0.00510359	2.62504	up	noncoding	ENST00000529777	RP11-689N19.3	GENCODE	407	chr11	-	76835716	76837201		AATAGAACAGGCTTTCAATTTTCTTTTAAAACCCCTGATTAAAATTGAGATTTTCAAAAC	natural antisense	NM_004055	CAPN5	calpain-5	+	76777991	76837198	13.9811	10.5211	4.24488	2.85255	11.2783	19.5368	11.1283	10.5785	9.2924	11.6925	4.10975	4.41809	4.20681	2.78615	2.77706	2.99443
ASHGA5P047574	0.00557242	0.0266497	2.6327	up	noncoding	uc001kfc.1	AK130076	UCSC_knowngene	1770	chr10	+	89706924	89708694		CAGGGGTGTGTGTGTGTAGTTAAAGATCAATTTAACTTAAAAGGTCTTGGTTAGAGAATA	intron sense-overlapping	NM_000314	PTEN	phosphatidylinositol 3,4,5-trisphosphate 3-phosphatase and dual-specificity protein phosphatase PTEN	+	89623194	89728532	28787.9	12787	14.8569	13.4603	20865.6	40567.7	24930.4	12652.9	12839.2	12868.9	14.4041	15.284	14.8825	13.3931	13.4645	13.5234
ASHGA5P027639	0.00134031	0.0114318	2.29208	up	noncoding	ENST00000544939	RP11-173P15.5	GENCODE	569	chr12	-	121159309	121161442		CTGTGAAAATCTTTCTTTTATTACTGTCTCATGTGGCAAAATAACATTTTATACAAATAA	natural antisense	NM_001080533	UNC119B	protein unc-119 homolog B	+	121147830	121161443	1680.89	848.253	10.7038	9.50712	1622.74	1845.18	1574.75	813.678	903.152	827.929	10.7632	10.4896	10.8585	9.37759	9.70716	9.43661
ASHGA5P034129	2.06754e-05	0.00171085	18.0326	up	noncoding	ENST00000562262	CTC-457E21.1	GENCODE	3355	chr19	-	22703796	22710751		GGACAAGTGGCTGTTTCTGTGACATATTTATTTTTACTGGCGTTTCATGTTGCTTAAAAA	intergenic							1057.14	76.0555	10.0356	5.86305	1061.32	1085.28	1024.82	75.1096	76.8109	76.2459	10.1572	9.70662	10.243	5.75668	5.99414	5.83833
ASHGA5P030886	0.0316756	0.0814812	2.31685	up	noncoding	ENST00000562485	RP11-20I23.8	GENCODE	9768	chr16	-	2604068	2616295		TCTCCATTTTTGGCATAACTAAGGCCGAAATCTGAATATCGTGCAGTTAAGGAAGTGTAA	natural antisense	NM_001261816	PDPK1	3-phosphoinositide-dependent protein kinase 1 isoform 3	+	2587964	2653191	22.3588	18.7409	4.87423	3.66207	27.3108	24.8864	14.8791	15.439	25.3759	15.4078	5.28829	4.73916	4.59525	3.31678	4.27827	3.39116
ASHGA5P030886	0.0316756	0.0814812	2.31685	up	noncoding	ENST00000562485	RP11-20I23.8	GENCODE	9768	chr16	-	2604068	2616295		TCTCCATTTTTGGCATAACTAAGGCCGAAATCTGAATATCGTGCAGTTAAGGAAGTGTAA	natural antisense	NM_002613	PDPK1	3-phosphoinositide-dependent protein kinase 1 isoform 1	+	2587964	2653191	22.3588	18.7409	4.87423	3.66207	27.3108	24.8864	14.8791	15.439	25.3759	15.4078	5.28829	4.73916	4.59525	3.31678	4.27827	3.39116
ASHGA5P030886	0.0316756	0.0814812	2.31685	up	noncoding	ENST00000562485	RP11-20I23.8	GENCODE	9768	chr16	-	2604068	2616295		TCTCCATTTTTGGCATAACTAAGGCCGAAATCTGAATATCGTGCAGTTAAGGAAGTGTAA	natural antisense	NM_031268	PDPK1	3-phosphoinositide-dependent protein kinase 1 isoform 2	+	2587964	2653191	22.3588	18.7409	4.87423	3.66207	27.3108	24.8864	14.8791	15.439	25.3759	15.4078	5.28829	4.73916	4.59525	3.31678	4.27827	3.39116
ASHGA5P029963	0.000243364	0.00479569	2.43853	up	noncoding	ENST00000561902	RP11-265N6.2	GENCODE	542	chr15	-	42859228	42862192		ATTTCCCACCTGAGAAATGGTTAATTCACTTATATTAATAAATTGTCATGGCTATTTTTT	natural antisense	NM_001130447	HAUS2	HAUS augmin-like complex subunit 2 isoform 2	+	42841010	42862190	53.2853	36.8548	6.04217	4.75616	50.5456	61.696	47.6144	36.9021	38.1686	35.4937	6.08886	5.90601	6.13165	4.67575	4.91069	4.68203
ASHGA5P029963	0.000243364	0.00479569	2.43853	up	noncoding	ENST00000561902	RP11-265N6.2	GENCODE	542	chr15	-	42859228	42862192		ATTTCCCACCTGAGAAATGGTTAATTCACTTATATTAATAAATTGTCATGGCTATTTTTT	natural antisense	NM_018097	HAUS2	HAUS augmin-like complex subunit 2 isoform 1	+	42841010	42862190	53.2853	36.8548	6.04217	4.75616	50.5456	61.696	47.6144	36.9021	38.1686	35.4937	6.08886	5.90601	6.13165	4.67575	4.91069	4.68203
ASHGA5P018013	0.00081683	0.00878092	2.06535	up	noncoding	ENST00000448371	RP11-157P1.4	GENCODE	307	chr20	-	60880487	60881452		TCCCAGGAAACCCTGAGCTCACAGCACCCACGCACACCCCGAATGGCTATGGAAGCTGCA	intronic antisense	NM_007002	ADRM1	proteasomal ubiquitin receptor ADRM1 precursor	+	60878026	60883918	327.997	197.44	8.36072	7.31434	282.612	471.184	230.196	205.667	191.246	195.407	8.35011	8.55087	8.18118	7.29828	7.39604	7.24869
ASHGA5P018013	0.00081683	0.00878092	2.06535	up	noncoding	ENST00000448371	RP11-157P1.4	GENCODE	307	chr20	-	60880487	60881452		TCCCAGGAAACCCTGAGCTCACAGCACCCACGCACACCCCGAATGGCTATGGAAGCTGCA	intronic antisense	NM_175573	ADRM1	proteasomal ubiquitin receptor ADRM1 precursor	+	60878026	60883918	327.997	197.44	8.36072	7.31434	282.612	471.184	230.196	205.667	191.246	195.407	8.35011	8.55087	8.18118	7.29828	7.39604	7.24869
ASHGA5P056037	0.000921895	0.00934331	2.3351	up	noncoding	NR_038170	FUT8	RefSeq	4262	chr14	+	65879447	66210839		CGTTATCTCCGGCCGACCCGAGCAGCCGGTTCCCTCCTCTCCAGGCCCCCTCCCCATCCC	exon sense-overlapping	NM_004480	FUT8	alpha-(1,6)-fucosyltransferase isoform b	+	65877309	66210839	10629.9	5251.77	13.3606	12.1371	11417.8	10376	10096	5553.3	4780.47	5421.53	13.4871	13.0969	13.4976	12.166	12.0501	12.1951
ASHGA5P056037	0.000921895	0.00934331	2.3351	up	noncoding	NR_038170	FUT8	RefSeq	4262	chr14	+	65879447	66210839		CGTTATCTCCGGCCGACCCGAGCAGCCGGTTCCCTCCTCTCCAGGCCCCCTCCCCATCCC	exon sense-overlapping	NM_178155	FUT8	alpha-(1,6)-fucosyltransferase isoform a	+	65877309	66210839	10629.9	5251.77	13.3606	12.1371	11417.8	10376	10096	5553.3	4780.47	5421.53	13.4871	13.0969	13.4976	12.166	12.0501	12.1951
ASHGA5P056037	0.000921895	0.00934331	2.3351	up	noncoding	NR_038170	FUT8	RefSeq	4262	chr14	+	65879447	66210839		CGTTATCTCCGGCCGACCCGAGCAGCCGGTTCCCTCCTCTCCAGGCCCCCTCCCCATCCC	exon sense-overlapping	NM_178156	FUT8	alpha-(1,6)-fucosyltransferase isoform a	+	65877309	66210839	10629.9	5251.77	13.3606	12.1371	11417.8	10376	10096	5553.3	4780.47	5421.53	13.4871	13.0969	13.4976	12.166	12.0501	12.1951
ASHGA5P022713	1.46896e-05	0.00154704	7.39473	up	noncoding	ENST00000561327	CTD-2335A18.1	GENCODE	957	chr15	+	89905717	89938562	ENST00000560008, uc002bnv.2	CCCCTTCCCGTTACTCCCCTGCTGGTGCCTCCCTCCTTGGCGCGCTTCCCACCTGCGATC	intergenic							134556	27782.5	17.4595	14.573	134318	156915	112434	28730.5	26015.5	28601.5	17.4848	17.6132	17.2805	14.5931	14.4587	14.6672
ASHGA5P029465	0.000818524	0.00878499	2.98162	up	noncoding	ENST00000557368	CTD-2201G16.1	GENCODE	207	chr14	+	23884547	23884895		CTCCTCAGCATTCCTGCACTCCTGCACTGCCTCCTCCACTTCAGTCTGGAGCTGGGACAG	natural antisense	NM_000257	MYH7	myosin-7	-	23881946	23904870	3730.57	1456.04	11.8337	10.2577	3521.67	4393.75	3276.31	1581.17	1607.51	1179.44	11.8279	11.7868	11.8866	10.3263	10.514	9.93261
ASHGA5P037751	0.000555728	0.00720982	8.26667	up	noncoding	TCONS_00024847	XLOC_011730	LincRNAs identified by Cabili et al	337	chr16	+	54881150	54888858		AACCAACCATTCCATCCGTATGAAGAGCGTAAGTCCTAGATTTGCGTCGTGATGTCATCT	intergenic							106.618	19.4089	6.77974	3.73244	67.0897	186.629	66.1363	23.4745	15.0443	19.7079	6.46652	7.30688	6.56583	3.96693	3.45751	3.77287
ASHGA5P050598	0.000819609	0.00878902	10.0078	up	noncoding	ENST00000452037	AC104655.3	GENCODE	515	chr2	+	105760580	105761370		CTCTGGGCAGAGGCCACGCGGGGACGGAGGAGGCAGAGAGGACGGGCTGTGATGGAGAAA	intergenic							89.3303	14.7891	6.62506	3.30201	74.6268	137.272	56.092	15.4224	19.498	9.44676	6.60817	6.91936	6.34765	3.31521	3.86179	2.72904
ASHGA5P025695	0.000161506	0.00405306	13.5357	up	noncoding	NR_027076	LOC283761	RefSeq	1197	chr15	-	90048160	90067265		CTTGTGACAGGAGCGCCCAGTTCATGGAGGCTGCTGCTGTCACTAATCTGTTTCCATCTT	intergenic							107.543	13.7977	6.96614	3.20744	105.911	102.351	114.367	17.2961	13.0603	11.0368	7.07546	6.5471	7.27586	3.47607	3.24017	2.90608
ASHGA5P018202	0.00248528	0.0164135	10.9299	up	noncoding	ENST00000450581	RP11-14C22.3	GENCODE	486	chr10	+	30944417	30946464		GGGAAGGAGTTTCTATTTCAACAATAAAAACTTAAGCTTCATTGGATTCCCATGTCAAAG	intergenic							102.267	15.7675	6.84209	3.39188	103.452	137.15	66.1993	18.1899	23.4047	5.70784	7.04167	6.91771	6.5669	3.5548	4.1464	2.47444
ASHGA5P021723	2.78104e-06	0.000945923	4.28405	up	noncoding	ENST00000539233	C11orf95	GENCODE	351	chr11	-	63531311	63533434	ENST00000433688, ENST00000445014	GGGCCTGGGGAGGAGGCTGAAGGAGTCCCTGCAGAACTGGTTCCGGGCCGAGTGTCTCAT	exon sense-overlapping	NM_001144936	C11orf95	uncharacterized protein C11orf95	-	63527363	63536113	110.433	40.0673	6.9802	4.88122	97.0621	138.446	95.7899	42.3799	35.7626	42.0592	6.95456	6.93112	7.05492	4.8864	4.81027	4.947
ASHGA5P016210	0.0282795	0.0756501	2.01035	up	noncoding	uc001acl.1	BC033949	UCSC_knowngene	971	chr1	+	995116	1001833		CCTTTTGAAGGTGGTTTCACCCCAACATCAGCAGGGTGGAGGCGGAGAAGCTGTTCCTAT	intergenic							11.5178	10.6765	3.89278	2.88533	7.02452	19.6118	7.91695	9.35517	10.3058	12.3685	3.48341	4.42349	3.77145	2.68335	2.90281	3.06984
ASHGA5P057486	0.00181211	0.0135678	2.99876	up	noncoding	TCONS_00018278	XLOC_008554	LincRNAs identified by Cabili et al	521	chr10	+	91613563	91674712		ACGAGAAAAGGTTGCTAACTTTGGAGGAAGCCAGCTGCCATGTCACAAAAAGATTCAGGA	intergenic							41.5619	25	5.69914	4.11478	36.2715	55.1578	33.2564	23.4935	19.2753	32.2312	5.65739	5.76443	5.67562	3.9681	3.84248	4.53376
ASHGA5P019853	0.00025459	0.00491559	8.00889	up	noncoding	ENST00000504129	CTC-498J12.3	GENCODE	946	chr5	-	68408938	68432221		CCATCATACTTCCATGAAATTAGAAAAAAGTTACCTACATAGGCAGAGAATTCAACTGTG	natural antisense	NM_022902	SLC30A5	zinc transporter 5 isoform 1	+	68389775	68426899	101.798	21.4419	6.88674	3.88514	93.0326	115.294	97.0685	25.355	22.971	15.9997	6.89224	6.69876	7.06924	4.09224	4.11843	3.44475
ASHGA5P030719	0.021667	0.0632549	7.0344	up	noncoding	ENST00000559989	RP11-561C5.3	GENCODE	7790	chr15	+	85739674	85757136	NR_033738	CTATAAAGACTATGACATCACAGGAAAATACAGTAAATACTTTTTAAAAGAATATAAAAG	intergenic							86.1256	13.5736	6.00139	3.18696	29.1371	205.718	23.5215	15.7878	7.4511	17.4819	5.36974	7.42599	5.20844	3.34589	2.62709	3.58791
ASHGA5P054306	0.0269426	0.0732073	2.22051	up	noncoding	ENST00000458044	RP11-443B7.1	GENCODE	359	chr1	-	235097122	235098873		AGGAATCAGATTGGAAAGAGTATGAGTTTGTACTTATGAAATAAAACTTTTATCTCTCTA	intergenic							43.6796	33.9409	5.76418	4.61329	57.2995	41.3788	32.3603	29.0183	41.4876	31.3167	6.25239	5.39915	5.64101	4.30654	5.04431	4.48902
ASHGA5P058249	0.000365443	0.00586507	3.46549	up	noncoding	TCONS_00028561	XLOC_013552	LincRNAs identified by Cabili et al	3706	chr20	+	47099590	47104748		AGAGCAGCATTGGCTCCTCCCCAGGTCTCCAGCTCCACCATCATCAAACTTGAATGGCAG	intergenic							5721.55	1933.96	12.4705	10.6775	6078.14	5712.59	5373.92	2069.52	1920.83	1811.53	12.6138	12.1769	12.6209	10.7141	10.7669	10.5514
ASHGA5P038092	0.000272772	0.0051113	5.61709	up	noncoding	ENST00000435368	AC023481.1	GENCODE	938	chr3	-	8406392	8408078		GAATTAATTGAATGAATGCATGGATGCAGAGTTGGATGGAGGAATGGATACATGATGGTA	intergenic							28.8261	8.65786	5.1703	2.68048	18.6162	43.1441	24.718	7.9979	9.06161	8.91407	4.78004	5.45576	5.27511	2.60005	2.75285	2.68854
ASHGA5P019056	0.000425246	0.0063374	5.78247	up	noncoding	ENST00000491962	RP11-34P13.13	GENCODE	278	chr1	-	165888	168767	ENST00000417964, ENST00000428504, ENST00000433986, ENST00000446912, ENST00000447412, ENST00000466557, ENST00000568048, NR_029401, uc002fqr.2	AGAAAATATGACATGAACTTATGAATTCAACAGGTGAAGATTTACAACTTGATAAATCAA	intergenic							48.0927	15.3257	5.87812	3.34643	45.5597	64.4379	34.2805	20.8406	11.5514	13.5853	5.95441	5.9641	5.71586	3.78047	3.05539	3.20344
ASHGA5P020258	0.00283931	0.0175786	2.24956	up	noncoding	ENST00000510550	RP11-90J7.3	GENCODE	595	chr10	+	80166300	80310614		CCGTGTTCAGAAAAAGTTTGCCAACTCCTGCTCTAGATTGATGGTTACAAAGTCTGACAG	intergenic							349.892	201.115	8.51105	7.3414	356.658	355.493	337.524	204.644	195.596	203.106	8.66532	8.16413	8.70369	7.29179	7.42736	7.30507
ASHGA5P032949	0.00305609	0.0183667	3.39819	up	noncoding	ENST00000581673	RP11-381P6.1	GENCODE	621	chr17	+	20867034	20883551		TTGGTTTCAGGAGGAAAGGAAGATAAACCCCTGTGTTTAAGCTGCCGTGTTAAATGGGAG	intergenic							70.6261	34.9535	6.41933	4.65456	66.7813	70.9787	74.1183	28.0913	34.9485	41.8207	6.46031	6.08456	6.71312	4.25263	4.7736	4.93747
ASHGA5P057543	0.00673615	0.030082	2.25893	up	noncoding	TCONS_00018649	XLOC_009000	LincRNAs identified by Cabili et al	1048	chr10	-	133730127	133733387		GCGTGAGGTCCCTACACTGTGTCATCCTACCCGCCTGAGGTCCCTACAAACACTGTCATT	intergenic							366.633	209.195	8.56704	7.3914	399.576	382.159	318.165	228.926	223.743	174.917	8.80834	8.26967	8.62312	7.45601	7.63874	7.07946
ASHGA5P031486	2.0371e-05	0.00170952	9.75278	up	noncoding	ENST00000572086	LINC00514	GENCODE	361	chr16	+	3042820	3050390		CTGATGCTGTCCCTGTTCCACTAGCCTGTCCCTAGCTCCTCTCCAATCTCTGTCCTGCAG	intergenic							15820.5	1937.61	13.9612	10.6753	15635	19058.5	12768	2018.06	2109.9	1684.86	13.9763	14.0449	13.8623	10.675	10.9025	10.4485
ASHGA5P043068	0.000493516	0.00679768	4.43086	up	noncoding	ENST00000441295	RP11-153N17.1	GENCODE	738	chr7	-	52232930	52260609		GGGCTGCTGCTGAAGAAGAAAGATTTGCTAAATTTTAATAGTTATTCTCACCTTCTTATG	intergenic							354.918	101.457	8.43909	6.2915	224.21	533.922	306.623	107.468	88.8571	108.046	8.03889	8.7044	8.57396	6.29805	6.21761	6.35884
ASHGA5P034167	4.68595e-05	0.00242218	2.45688	up	noncoding	ENST00000433059	AC002398.5	GENCODE	2167	chr19	-	36279777	36288787		GCTCCCAGGAGTAACTCCTGCCTTGGTGCCTCCCCAAAAGGAAATAGAATGATAAAGTGC	intergenic							926.059	440.248	9.82699	8.53017	842.537	1113.14	822.505	452.672	436.012	432.061	9.81816	9.74626	9.91655	8.50338	8.62347	8.46365
ASHGA5P022921	0.00780834	0.0330562	2.33115	up	noncoding	ENST00000565566	ABCC6P1	pseudogene	1170	chr16	+	18582597	18604038		CCTGCGCGGGGTCTGGAACCAGACAGAGCCTGAACCTGCCGCCACCAGCCTGCTGAGCCT								329.513	184.91	8.4293	7.20826	358.809	321.858	307.871	167.052	202.142	185.536	8.67256	8.03464	8.58071	6.97824	7.47999	7.16656
ASHGA5P031998	0.00816466	0.0340606	2.04617	up	noncoding	ENST00000562405	RP11-830F9.5	GENCODE	532	chr16	+	88947445	88950327		ACGCTCTGAGCTCCAGGCTTCCTGGCAGACCAGCCCGTGTTTTCCTACAAAGTGAAAAAG	intronic antisense	NM_005187	CBFA2T3	protein CBFA2T3 isoform 1	-	88941262	89043504	178.016	122.334	7.60984	6.57692	174.069	183.348	176.631	136.987	125.22	104.794	7.70845	7.28395	7.83713	6.67335	6.7377	6.31972
ASHGA5P031998	0.00816466	0.0340606	2.04617	up	noncoding	ENST00000562405	RP11-830F9.5	GENCODE	532	chr16	+	88947445	88950327		ACGCTCTGAGCTCCAGGCTTCCTGGCAGACCAGCCCGTGTTTTCCTACAAAGTGAAAAAG	intronic antisense	NM_175931	CBFA2T3	protein CBFA2T3 isoform 2	-	88941262	89007608	178.016	122.334	7.60984	6.57692	174.069	183.348	176.631	136.987	125.22	104.794	7.70845	7.28395	7.83713	6.67335	6.7377	6.31972
ASHGA5P027133	0.000749934	0.00836782	4.08666	up	noncoding	ENST00000545226	RP11-877E17.2	GENCODE	531	chr12	-	26105940	26111975	ENST00000502069, uc001rgu.1	AGCTGGATAAAGTATTTATAGAAGATAGAGGACCTGTGGTGGCTCATGCCTGTAATCCAA	natural antisense	NM_001164748	RASSF8	ras association domain-containing protein 8 isoform a	+	26111963	26225807	7713.07	2161.26	12.859	10.8281	7012.16	10760.2	5366.83	2133.89	1703.05	2646.84	12.8178	13.1423	12.6168	10.7591	10.5983	11.1268
ASHGA5P027133	0.000749934	0.00836782	4.08666	up	noncoding	ENST00000545226	RP11-877E17.2	GENCODE	531	chr12	-	26105940	26111975	ENST00000502069, uc001rgu.1	AGCTGGATAAAGTATTTATAGAAGATAGAGGACCTGTGGTGGCTCATGCCTGTAATCCAA	natural antisense	NM_007211	RASSF8	ras association domain-containing protein 8 isoform b	+	26111963	26232825	7713.07	2161.26	12.859	10.8281	7012.16	10760.2	5366.83	2133.89	1703.05	2646.84	12.8178	13.1423	12.6168	10.7591	10.5983	11.1268
ASHGA5P031414	0.0496701	0.112097	2.11987	up	noncoding	ENST00000554623	RP11-566K11.4	GENCODE	985	chr16	-	89986234	89989070		AGAGGAAGAAAATGCCCAGCAGGATGGTGAGGGTGACAGCGCCTTTAAGGCCAAAGCCCT	intronic antisense	NM_001197181	TUBB3	tubulin beta-3 chain isoform 2	+	89988416	90002505	10.677	9.97332	3.90655	2.82258	12.7546	7.59727	11.679	11.5496	6.65965	11.7107	4.27197	3.17032	4.27737	2.8961	2.57472	2.99691
ASHGA5P031414	0.0496701	0.112097	2.11987	up	noncoding	ENST00000554623	RP11-566K11.4	GENCODE	985	chr16	-	89986234	89989070		AGAGGAAGAAAATGCCCAGCAGGATGGTGAGGGTGACAGCGCCTTTAAGGCCAAAGCCCT	natural antisense	NM_002386	MC1R	melanocyte-stimulating hormone receptor	+	89984286	89987385	10.677	9.97332	3.90655	2.82258	12.7546	7.59727	11.679	11.5496	6.65965	11.7107	4.27197	3.17032	4.27737	2.8961	2.57472	2.99691
ASHGA5P051490	1.44382e-05	0.00154055	2.38007	up	noncoding	ENST00000432361	BX004987.4	GENCODE	1338	chr1	-	143382244	143467632		ACAGGAGTGGGTAGGCGAGGCTGGTGGCCCTGGGCCCGGAGTCTGCAGGCCGCGCTCCTG	intergenic							66.9554	45.0822	6.31624	5.06524	56.3331	87.723	56.8101	47.1397	43.448	44.6589	6.22899	6.35534	6.3644	5.05007	5.11048	5.03517
ASHGA5P030830	0.000298769	0.00529609	2.96136	up	noncoding	TCONS_00008437	XLOC_003883	LincRNAs identified by Cabili et al	248	chr4	-	12471481	12611001		TCTTACGGCAAAAAGGTAAGAGAACTTGGCTGGGCACAGTGGATCACTCATGTGATTCAA	intergenic							152.054	75.1875	7.38982	5.82356	137.502	193.092	125.567	73.7864	62.1161	89.66	7.41422	7.34729	7.40796	5.72854	5.65884	6.08331
ASHGA5P052178	0.000539072	0.00709524	2.98759	up	noncoding	ENST00000507505	RP11-43F13.1	GENCODE	1009	chr5	-	1599235	1634117	uc003jcp.4	GCATCATTTCAAAAGTCCAAGAAGGGAAGGTAAGAATTTCAGAAGTGAAAGTTATCATGA	intergenic							12.562	6.03113	4.07992	2.50093	9.32071	18.6203	9.74482	5.46937	7.14667	5.47737	3.85063	4.35404	4.03508	2.44034	2.60598	2.45648
ASHGA5P008348	6.76743e-05	0.00286004	2.00581	up	noncoding	NR_033818	IKBKB	RefSeq	4187	chr8	+	42128819	42190171		TGGTGCCCCTCCTCTGCGCTTAGATACCTTCATGAAAACAGAATCATCCATCGGGATCTA	exon sense-overlapping	NM_001190720	IKBKB	inhibitor of nuclear factor kappa-B kinase subunit beta isoform 2	+	42128819	42190171	5197.85	2942.2	12.3056	11.3014	4614.77	6637.22	4341.56	3144.96	2805.07	2876.58	12.2275	12.4113	12.2779	11.3347	11.3054	11.2642
ASHGA5P008348	6.76743e-05	0.00286004	2.00581	up	noncoding	NR_033818	IKBKB	RefSeq	4187	chr8	+	42128819	42190171		TGGTGCCCCTCCTCTGCGCTTAGATACCTTCATGAAAACAGAATCATCCATCGGGATCTA	exon sense-overlapping	NM_001242778	IKBKB	inhibitor of nuclear factor kappa-B kinase subunit beta isoform 5	+	42128819	42190171	5197.85	2942.2	12.3056	11.3014	4614.77	6637.22	4341.56	3144.96	2805.07	2876.58	12.2275	12.4113	12.2779	11.3347	11.3054	11.2642
ASHGA5P008348	6.76743e-05	0.00286004	2.00581	up	noncoding	NR_033818	IKBKB	RefSeq	4187	chr8	+	42128819	42190171		TGGTGCCCCTCCTCTGCGCTTAGATACCTTCATGAAAACAGAATCATCCATCGGGATCTA	exon sense-overlapping	NM_001556	IKBKB	inhibitor of nuclear factor kappa-B kinase subunit beta isoform 1	+	42128819	42190171	5197.85	2942.2	12.3056	11.3014	4614.77	6637.22	4341.56	3144.96	2805.07	2876.58	12.2275	12.4113	12.2779	11.3347	11.3054	11.2642
ASHGA5P021697	0.000422254	0.00631891	7.62578	up	noncoding	ENST00000538550	RP11-21A7A.2	GENCODE	553	chr11	+	63827895	63870985		TGACCTGGGGCAAGGTGAGGAAGCAGGCAGTGGGCGAGAAGATGGATTCCTTTTTGGACA	intronic antisense	NM_014067	MACROD1	O-acetyl-ADP-ribose deacetylase MACROD1	-	63766029	63933585	141.25	26.5866	7.17248	4.24159	112.465	235.728	75.5555	28.8987	27.3129	23.5483	7.15915	7.61514	6.74315	4.30093	4.38376	4.04008
ASHGA5P052200	2.00513e-05	0.00170952	2.78491	up	noncoding	NR_027253	LOC285696	RefSeq	3316	chr5	-	17130136	17217531		CTCCTCCGGCGCAGACCCTCCCCTCTCCCCTCCAGCCTGGACACGCCCGCCTCCCCTTGA	bidirectional	NM_006317	BASP1	brain acid soluble protein 1	+	17217749	17276943	95387.1	49331.8	16.8648	15.3871	101063	98032.6	87065.6	52094	49411.4	46489.9	16.9547	16.7741	16.8655	15.4592	15.3511	15.3511
ASHGA5P016979	0.0078744	0.0332715	2.79618	up	noncoding	ENST00000436200	RP4-717I23.3	GENCODE	492	chr1	-	93776836	93802994	ENST00000411670, ENST00000413606, ENST00000429859, ENST00000432741, ENST00000440778, ENST00000446528, ENST00000450843, ENST00000451302, NR_034089, uc021opy.1	TGCAAGCTATAAAATAGTGCTTTCACTTAGAAAAGGCGCGGTGGCTCATGCCTCTAATAG	intergenic							2857.13	1151.42	11.3826	9.89917	2411.43	4302.1	1857.85	1181.57	778.341	1494.34	11.2914	11.7589	11.0976	9.92401	9.49227	10.2812
ASHGA5P028929	0.000168713	0.00410257	3.49615	up	noncoding	TCONS_00010505	XLOC_005024	LincRNAs identified by Cabili et al	745	chr5	-	139531023	139532171		TTAGCAAGTGCTTTTCCCACACTTGAGACTGCCTCTCTCCTCTCTAAGTCCTGGATTTTA	intergenic							1854.84	617.591	10.849	9.04328	1896.7	2033.33	1634.5	633.709	632.298	586.765	10.9829	10.6403	10.9239	9.00773	9.19634	8.92577
ASHGA5P054715	0.000872096	0.00908907	5.0555	up	noncoding	TCONS_00006770	XLOC_003405	LincRNAs identified by Cabili et al	487	chr3	-	197363225	197364301	TCONS_00006377	TCAGTTACTGAGAAGAGAAAGAAAATGTCTTCTGAAAGAGGTGAACTCAGTCATTACCAA	intergenic							1947.2	457.218	10.9055	8.56767	1620.77	2155.25	2065.56	439.295	545.199	387.16	10.7612	10.717	11.2384	8.45225	8.96059	8.29017
ASHGA5P058288	0.00304411	0.0183279	3.07525	up	noncoding	TCONS_00029279	XLOC_014063	LincRNAs identified by Cabili et al	220	chr21	-	35339557	35340977		AAAGAGCCCTTTTGAGAGACACAGAAATGGAAAGCACGTATTAAGGATGTGGAGCTACCC	intergenic							16.311	10.3333	4.49026	2.86956	14.6383	18.6295	15.665	8.86384	7.24435	14.8918	4.45763	4.35493	4.65821	2.65366	2.61274	3.34228
ASHGA5P052567	0.0352635	0.0878799	2.58677	up	noncoding	ENST00000487130	LINC00518	GENCODE	999	chr6	-	10429780	10435107	ENST00000479822	GAAGAGGGAGAGTCCTCAGAGAGTCCTCTCTCTCGGCATGGACACAAAAGAAAAGCCATG	intergenic							15.1472	11.1454	4.36608	2.99493	11.564	13.4448	20.433	14.5054	13.8174	5.11345	4.13962	3.93105	5.02757	3.22074	3.32841	2.43563
ASHGA5P040604	0.00092861	0.00935929	5.50817	up	noncoding	ENST00000522464	CTD-2374C24.1	GENCODE	789	chr5	-	104308987	104582065		CTTTCTGCTGAAAGAGATCAGTGTGCTTTCTGTTTCCTGAACTCAACCTTGGGAAAAATA	intergenic							404.008	98.4899	8.70097	6.2394	422.473	405.203	384.348	94.6985	119.046	81.7251	8.88405	8.3438	8.87507	6.11639	6.65985	5.94194
ASHGA5P047749	0.020956	0.0618567	2.14622	up	noncoding	ENST00000425266	RP11-564D11.3	GENCODE	468	chr10	+	124647948	124657485	NR_027282	CAGCCTGTTTGCTCCTACTTGGAATAGATTCTTTCTAAAAATATGGAACTGATAGAAAAG	intergenic							628.258	351.612	9.24834	8.14654	453.593	849.022	582.159	439.772	364.129	250.935	8.97627	9.34763	9.42112	8.45498	8.36483	7.61982
ASHGA5P057206	0.00636819	0.0290756	2.2431	up	noncoding	TCONS_00014603	XLOC_006704	LincRNAs identified by Cabili et al	610	chr8	+	9014344	9016127		AAATCCAAATGTCTGGGATGTTTCTCTTGCATGCCTCTGGAATCAAATGACTCTGATACT	intergenic							377.283	215.873	8.61096	7.44547	404.493	371.135	356.22	232.888	221.293	193.437	8.82372	8.2294	8.77976	7.48337	7.62154	7.23151
ASHGA5P015407	2.00939e-05	0.00170952	3.05215	up	noncoding	ENST00000420006	SNHG11	GENCODE	720	chr20	+	37075352	37079500		CCTCCTCATGGCCAGGCCATCCAGTGGCCATCCTCCGTGTCCTCCCGCCTCCTCCTGGTG	intergenic							5039.12	1910.97	12.2741	10.6643	4976.19	5591.71	4549.45	1953.14	1826.97	1952.79	12.3308	12.1411	12.3506	10.6332	10.6942	10.6656
ASHGA5P032268	8.92158e-06	0.00130923	4.66466	up	noncoding	ENST00000583364	AC015818.3	GENCODE	563	chr17	-	20425404	20427762	ENST00000444070, ENST00000445433, ENST00000579363, ENST00000579679, ENST00000579946, ENST00000581247, ENST00000582261, ENST00000584151, ENST00000584833, ENST00000585017, uc002gxc.1	TGAACTAATTGACACCTACCACCGCTTGCTGGAGGTTGAGGACGCCCAGTGAGTGTGCAC	intergenic							110.703	36.6562	6.96419	4.74242	90.5208	148.116	93.4711	40.9011	34.2891	34.7783	6.85011	7.01741	7.02506	4.8335	4.74307	4.65069
ASHGA5P023362	0.000901289	0.00923938	4.09378	up	noncoding	ENST00000579301	AC005562.2	GENCODE	570	chr17	+	28927813	28942998	ENST00000514992	CCAGGCGCATGAAATCTTTAACATTACAGGTATATTGAAAAGTCTGATTCAGTTACAATC	intergenic							201.554	68.6753	7.72675	5.69332	140.938	282.908	180.817	74.2315	76.4574	55.3369	7.44809	7.86667	7.86551	5.73723	5.98569	5.35704
ASHGA5P055699	0.00350293	0.019931	3.41148	up	noncoding	ENST00000544727	RP11-983C2.2	GENCODE	482	chr12	-	127355011	127359211	NR_033970	AAGACAGCACCGGGTTTCACACTGGCAAGGCAGGAGGCTGTGTGCTGCCAGAACGACCAG	intergenic							15.5712	7.61404	4.382	2.6116	9.70188	18.5096	18.5022	7.23339	8.54642	7.06231	3.9101	4.34754	4.88835	2.55493	2.70644	2.57344
ASHGA5P057251	3.80956e-05	0.00218922	3.02239	up	noncoding	TCONS_00014987	XLOC_007067	LincRNAs identified by Cabili et al	240	chr8	-	41041412	41042272		AAGCTGCCTGCTGCTGCCACAGGTCAACACCGTCACCACTCAACTGATATCTTACTGCTT	intergenic							17601.8	6791.46	14.1288	12.5331	16143.2	20015.4	16646.7	6846.89	6421.16	7106.34	14.0182	14.1144	14.2537	12.4943	12.4871	12.6177
ASHGA5P032889	0.0020971	0.0148149	2.46802	up	noncoding	ENST00000582325	RP11-524F11.1	GENCODE	795	chr17	+	17410664	17411622		ACATGCATGTGTTTGTGCACACAGAGGAGAGGGGGGAGCCAGGTGTGTTGGGAACCCTAA	intronic antisense	NM_001267551	PEMT	phosphatidylethanolamine N-methyltransferase isoform 1	-	17408876	17495017	30.4048	22.3415	5.27139	3.96803	24.1671	43.0278	24.0195	19.7012	24.6323	22.6912	5.1248	5.45224	5.23712	3.68793	4.23075	3.98542
ASHGA5P032889	0.0020971	0.0148149	2.46802	up	noncoding	ENST00000582325	RP11-524F11.1	GENCODE	795	chr17	+	17410664	17411622		ACATGCATGTGTTTGTGCACACAGAGGAGAGGGGGGAGCCAGGTGTGTTGGGAACCCTAA	intronic antisense	NM_001267552	PEMT	phosphatidylethanolamine N-methyltransferase isoform 3	-	17408876	17495017	30.4048	22.3415	5.27139	3.96803	24.1671	43.0278	24.0195	19.7012	24.6323	22.6912	5.1248	5.45224	5.23712	3.68793	4.23075	3.98542
ASHGA5P032889	0.0020971	0.0148149	2.46802	up	noncoding	ENST00000582325	RP11-524F11.1	GENCODE	795	chr17	+	17410664	17411622		ACATGCATGTGTTTGTGCACACAGAGGAGAGGGGGGAGCCAGGTGTGTTGGGAACCCTAA	intronic antisense	NM_007169	PEMT	phosphatidylethanolamine N-methyltransferase isoform 2	-	17408876	17485745	30.4048	22.3415	5.27139	3.96803	24.1671	43.0278	24.0195	19.7012	24.6323	22.6912	5.1248	5.45224	5.23712	3.68793	4.23075	3.98542
ASHGA5P032889	0.0020971	0.0148149	2.46802	up	noncoding	ENST00000582325	RP11-524F11.1	GENCODE	795	chr17	+	17410664	17411622		ACATGCATGTGTTTGTGCACACAGAGGAGAGGGGGGAGCCAGGTGTGTTGGGAACCCTAA	intronic antisense	NM_148172	PEMT	phosphatidylethanolamine N-methyltransferase isoform 1	-	17408876	17495017	30.4048	22.3415	5.27139	3.96803	24.1671	43.0278	24.0195	19.7012	24.6323	22.6912	5.1248	5.45224	5.23712	3.68793	4.23075	3.98542
ASHGA5P032889	0.0020971	0.0148149	2.46802	up	noncoding	ENST00000582325	RP11-524F11.1	GENCODE	795	chr17	+	17410664	17411622		ACATGCATGTGTTTGTGCACACAGAGGAGAGGGGGGAGCCAGGTGTGTTGGGAACCCTAA	intronic antisense	NM_148173	PEMT	phosphatidylethanolamine N-methyltransferase isoform 2	-	17408876	17480779	30.4048	22.3415	5.27139	3.96803	24.1671	43.0278	24.0195	19.7012	24.6323	22.6912	5.1248	5.45224	5.23712	3.68793	4.23075	3.98542
ASHGA5P023029	0.00693428	0.030654	2.45656	up	noncoding	ENST00000568048	FAM157C	GENCODE	474	chr16	+	90195030	90204332	ENST00000417964	TTCAACTCTGAGAAATGGAATCATCGTATCGCTGATCTACGTAAACAAACTGAAGAATTG	intergenic							173.688	92.6256	7.45554	6.1589	122.926	290.817	107.322	92.8085	99.791	85.2775	7.26795	7.90497	7.19371	6.08632	6.38584	6.00455
ASHGA5P018588	0.00451854	0.0234735	2.05529	up	noncoding	ENST00000455327	RP1-40E16.3	GENCODE	335	chr6	-	3051334	3053987		TGGCTGGAGGGACACCTGGCCTGGGTGGAGCCCACTCCTCAGCACCCACCTCACTTCTGG	intergenic							416.863	256.707	8.7425	7.70316	430.095	422.163	398.33	284.89	239.695	245.535	8.90504	8.40197	8.92048	7.7881	7.73401	7.58736
ASHGA5P051833	0.00018918	0.00431716	7.86339	up	noncoding	NR_047574	TMEM44-AS1	RefSeq	1429	chr3	+	194304996	194311561	NR_047573, NR_047575	GCCCAGTTTGTTAGTGATTTACTGATAATAACTGAATCGAGTACTAATACTTGGCGATTT	intronic antisense	NM_001011655	TMEM44	transmembrane protein 44 isoform b	-	194308401	194354150	286.556	51.7753	8.2389	5.26375	284.306	307.752	267.61	53.7546	59.3226	42.2486	8.35684	7.97568	8.38419	5.25146	5.58562	4.95418
ASHGA5P051833	0.00018918	0.00431716	7.86339	up	noncoding	NR_047574	TMEM44-AS1	RefSeq	1429	chr3	+	194304996	194311561	NR_047573, NR_047575	GCCCAGTTTGTTAGTGATTTACTGATAATAACTGAATCGAGTACTAATACTTGGCGATTT	intronic antisense	NM_001166305	TMEM44	transmembrane protein 44 isoform c	-	194308401	194354150	286.556	51.7753	8.2389	5.26375	284.306	307.752	267.61	53.7546	59.3226	42.2486	8.35684	7.97568	8.38419	5.25146	5.58562	4.95418
ASHGA5P051833	0.00018918	0.00431716	7.86339	up	noncoding	NR_047574	TMEM44-AS1	RefSeq	1429	chr3	+	194304996	194311561	NR_047573, NR_047575	GCCCAGTTTGTTAGTGATTTACTGATAATAACTGAATCGAGTACTAATACTTGGCGATTT	intronic antisense	NM_001166306	TMEM44	transmembrane protein 44 isoform d	-	194308401	194354150	286.556	51.7753	8.2389	5.26375	284.306	307.752	267.61	53.7546	59.3226	42.2486	8.35684	7.97568	8.38419	5.25146	5.58562	4.95418
ASHGA5P051833	0.00018918	0.00431716	7.86339	up	noncoding	NR_047574	TMEM44-AS1	RefSeq	1429	chr3	+	194304996	194311561	NR_047573, NR_047575	GCCCAGTTTGTTAGTGATTTACTGATAATAACTGAATCGAGTACTAATACTTGGCGATTT	intronic antisense	NM_138399	TMEM44	transmembrane protein 44 isoform a	-	194308401	194354150	286.556	51.7753	8.2389	5.26375	284.306	307.752	267.61	53.7546	59.3226	42.2486	8.35684	7.97568	8.38419	5.25146	5.58562	4.95418
ASHGA5P022034	0.000786645	0.00859725	5.54158	up	noncoding	ENST00000547626	RP11-493L12.2	GENCODE	420	chr12	-	47599680	47603157	ENST00000547851, ENST00000550426	TTGGGATTACAGCAGGCTGAGGAATTACCAAGGAGGCAGGAGGTGGAGCAAAACACACCA	intronic antisense	ENST00000546455	PCED1B	PC-esterase domain containing 1B [Source:HGNC Symbol;Acc:28255]	+	47473385	47630443	67.8512	19.2957	6.20933	3.73903	47.0262	116.171	40.3561	18.2664	18.2212	21.3994	5.99736	6.70945	5.92117	3.56142	3.75566	3.90001
ASHGA5P047399	0.000303165	0.00531659	3.40982	up	noncoding	uc010qgc.2	LOC642826	UCSC_knowngene	805	chr10	+	48185855	48186660		AATGGTACCCTGCCCCGCTTTTTCTCAATCAAGCTGTCAGATTTTATGCAGCCCGATATT	intergenic							2482.7	828.026	11.2444	9.47473	2518.23	2570.02	2359.84	818.917	850.077	815.085	11.3507	10.9837	11.3988	9.38552	9.62367	9.41501
ASHGA5P050971	0.000215404	0.00455656	26.8647	up	noncoding	uc002xem.1	AX746620	UCSC_knowngene	2068	chr20	+	34498421	34501231		TTAATTCTAGCTACAAAAGACAAGGAAAAGAATAAAGAGAAGAAATTCAAGGAGTTTGTG	exon sense-overlapping	NM_016436	PHF20	PHD finger protein 20	+	34359922	34538288	535.411	28.8685	9.07182	4.32418	552.834	549.583	503.816	19.9351	36.7345	29.9358	9.23968	8.74778	9.22799	3.7067	4.85352	4.41231
ASHGA5P047572	2.83383e-06	0.000945923	4.17093	up	noncoding	TCONS_00014179	XLOC_006188	LincRNAs identified by Cabili et al	233	chr7	+	99597001	99605862	TCONS_00013555	CCCCACCTGCAGAGTCAAGTCCCTCCTCCCACCTCAGCACTGCTAGAAAAGAGCTTCAGG	intergenic							19278.9	5478.99	14.2589	12.1985	18384.9	23341.2	16110.5	5813.52	5207.58	5415.89	14.2132	14.3611	14.2024	12.231	12.1715	12.1931
ASHGA5P014576	0.00104531	0.00988842	2.2929	up	noncoding	ENST00000411491	DPY19L2P2	GENCODE	3433	chr7	-	102815719	102920752		TGAATCATCCACATTACGAAGATGCAGACTTGAGGCCTGGTTGCAGCATGCTTGAAATCT	intergenic							117.203	76.1606	7.05832	5.86115	100.779	143.316	107.514	82.8032	79.3585	66.32	7.00363	6.9751	7.19623	5.91373	6.04177	5.62794
ASHGA5P027688	0.000278917	0.00516745	3.40408	up	noncoding	ENST00000541797	RP11-749H20.1	GENCODE	462	chr12	-	128278071	128305728		CTACCTCTTCTCTCTCTACTTGAAATTCAAGCAAGACCTTGGAGAATACAGGTGGAGCTG	intergenic							536.852	195.595	9.05563	7.28837	440.027	674.509	496.019	227.804	188.453	170.527	8.93606	9.02728	9.20356	7.4483	7.37481	7.042
ASHGA5P053610	0.00837398	0.0346029	2.02663	up	noncoding	ENST00000442850	AC084125.4	GENCODE	428	chr8	+	145663057	145665354		TTCTCTGTCCAGTTCCGGGAAAGCACTGGCCGTCCTGCCTGCCTGTGGCTGTTCCTGCTA	natural antisense	NM_013432	TONSL	tonsoku-like protein	-	145654162	145669812	1056.69	606.938	10.0324	9.01335	1130.62	1040.43	999.037	662.683	595.163	562.967	10.2509	9.6395	10.2069	9.06838	9.10505	8.8666
ASHGA5P058237	0.00243706	0.0162312	2.13001	up	noncoding	TCONS_00028435	XLOC_013788	LincRNAs identified by Cabili et al	663	chr20	-	48779906	48782695		ACGGGCATGCAGGGCTCCTGGATGCTGTGCTGAAAACACCACGTACAGAAGCCAGTCTAA	intergenic							9.14969	8.0695	3.73507	2.64421	9.15062	9.41983	8.87862	10.7134	6.15582	7.33924	3.82928	3.46049	3.91545	2.79971	2.54278	2.59014
ASHGA5P020628	0.000185742	0.00428839	2.01859	up	noncoding	ENST00000517726	EVX1-AS	GENCODE	480	chr7	-	27281047	27286848		GTAGTAAATCATCTCTCACTCTCTCCTCCAAATGACTGATGGCCTTAAGTTTTCCACAGC	intronic antisense	NM_001989	EVX1	homeobox even-skipped homolog protein 1	+	27282163	27286192	1188	685.777	10.2074	9.19408	1053.72	1408.88	1101.4	728.825	633.942	694.563	10.1483	10.117	10.357	9.21096	9.20071	9.17057
ASHGA5P044729	3.50206e-05	0.00211704	10.3577	up	noncoding	TCONS_00001270	XLOC_000556	LincRNAs identified by Cabili et al	611	chr1	+	212840986	212848586		CTTCCTTAGAAATCCTACTGTCTGCAGCTGGGAATGAATGGAATGAAGGTCAAGGATGAA	intergenic							46.72	5.97835	5.80121	2.42858	37.6118	70.8966	31.6515	7.93504	5	5	5.70563	6.08375	5.61425	2.5965	2.34646	2.34278
ASHGA5P017314	0.000185678	0.00428839	3.16235	up	noncoding	NR_037669	GGCT	RefSeq	1051	chr7	-	30536236	30544457		CCGCCTGCAGGCAAGAAGGGGTTAAAAGTGGAATGTATGTTGTAATAGAAGTTAAAGTTG	exon sense-overlapping	NM_001199815	GGCT	gamma-glutamylcyclotransferase isoform 2	-	30536236	30544457	5970.56	2162.14	12.5049	10.8439	5016.85	7981.95	4912.88	2426.67	1947.15	2112.6	12.3421	12.7133	12.4593	10.9643	10.7897	10.7777
ASHGA5P017314	0.000185678	0.00428839	3.16235	up	noncoding	NR_037669	GGCT	RefSeq	1051	chr7	-	30536236	30544457		CCGCCTGCAGGCAAGAAGGGGTTAAAAGTGGAATGTATGTTGTAATAGAAGTTAAAGTTG	exon sense-overlapping	NM_001199816	GGCT	gamma-glutamylcyclotransferase isoform 3	-	30536236	30544457	5970.56	2162.14	12.5049	10.8439	5016.85	7981.95	4912.88	2426.67	1947.15	2112.6	12.3421	12.7133	12.4593	10.9643	10.7897	10.7777
ASHGA5P017314	0.000185678	0.00428839	3.16235	up	noncoding	NR_037669	GGCT	RefSeq	1051	chr7	-	30536236	30544457		CCGCCTGCAGGCAAGAAGGGGTTAAAAGTGGAATGTATGTTGTAATAGAAGTTAAAGTTG	exon sense-overlapping	NM_001199817	GGCT	gamma-glutamylcyclotransferase isoform 4	-	30536236	30544457	5970.56	2162.14	12.5049	10.8439	5016.85	7981.95	4912.88	2426.67	1947.15	2112.6	12.3421	12.7133	12.4593	10.9643	10.7897	10.7777
ASHGA5P017314	0.000185678	0.00428839	3.16235	up	noncoding	NR_037669	GGCT	RefSeq	1051	chr7	-	30536236	30544457		CCGCCTGCAGGCAAGAAGGGGTTAAAAGTGGAATGTATGTTGTAATAGAAGTTAAAGTTG	exon sense-overlapping	NM_024051	GGCT	gamma-glutamylcyclotransferase isoform 1	-	30536236	30544457	5970.56	2162.14	12.5049	10.8439	5016.85	7981.95	4912.88	2426.67	1947.15	2112.6	12.3421	12.7133	12.4593	10.9643	10.7897	10.7777
ASHGA5P032964	0.00290388	0.0178214	2.07038	up	noncoding	NR_028336	FAM27L	RefSeq	609	chr17	+	21825369	21826499		TCTAGGTCTGGCTGAATGTCTTCAAAAAAGATCACTTCCCAGTCCATCAGGGAGACAGTT	intergenic							70.9963	55.2628	6.41782	5.36793	61.5621	78.686	72.7408	60.3822	55.1133	50.2929	6.3493	6.21639	6.68777	5.42357	5.4708	5.20942
ASHGA5P032181	1.0086e-05	0.00132897	8.1085	up	noncoding	ENST00000582915	RP11-597M12.1	GENCODE	335	chr17	-	12893465	12893927		AAAGGAACAAACAAAACCTGCACCACCAGCATCACCACACGGACTGGAGATCACAATTTT	natural antisense	NM_014859	ARHGAP44	rho GTPase-activating protein 44	+	12692828	12894960	895.545	137.202	9.77461	6.75517	790.083	1101.05	795.507	144.375	141.438	125.792	9.72345	9.73373	9.86664	6.75744	6.92502	6.58306
ASHGA5P050774	0.0135193	0.0466778	2.26529	up	noncoding	ENST00000431770	RP5-1033H22.2	GENCODE	722	chr1	+	94057755	94060341		ATTCTGGACGGTGAGTGGGGAGCCACACCAAGGAATTGGCTGGGTGGAAGGTCTGATTGA	natural antisense	NM_001261408	BCAR3	breast cancer anti-estrogen resistance protein 3 isoform 1	-	94027342	94312706	10.4438	8.12293	3.85039	2.6707	6.42308	13.7053	11.2031	5.78169	10.3123	8.27484	3.37597	3.95904	4.21617	2.4602	2.90363	2.64826
ASHGA5P050774	0.0135193	0.0466778	2.26529	up	noncoding	ENST00000431770	RP5-1033H22.2	GENCODE	722	chr1	+	94057755	94060341		ATTCTGGACGGTGAGTGGGGAGCCACACCAAGGAATTGGCTGGGTGGAAGGTCTGATTGA	natural antisense	NM_001261409	BCAR3	breast cancer anti-estrogen resistance protein 3 isoform 1	-	94027342	94146926	10.4438	8.12293	3.85039	2.6707	6.42308	13.7053	11.2031	5.78169	10.3123	8.27484	3.37597	3.95904	4.21617	2.4602	2.90363	2.64826
ASHGA5P050774	0.0135193	0.0466778	2.26529	up	noncoding	ENST00000431770	RP5-1033H22.2	GENCODE	722	chr1	+	94057755	94060341		ATTCTGGACGGTGAGTGGGGAGCCACACCAAGGAATTGGCTGGGTGGAAGGTCTGATTGA	natural antisense	NM_001261410	BCAR3	breast cancer anti-estrogen resistance protein 3 isoform 2	-	94027342	94079702	10.4438	8.12293	3.85039	2.6707	6.42308	13.7053	11.2031	5.78169	10.3123	8.27484	3.37597	3.95904	4.21617	2.4602	2.90363	2.64826
ASHGA5P050774	0.0135193	0.0466778	2.26529	up	noncoding	ENST00000431770	RP5-1033H22.2	GENCODE	722	chr1	+	94057755	94060341		ATTCTGGACGGTGAGTGGGGAGCCACACCAAGGAATTGGCTGGGTGGAAGGTCTGATTGA	natural antisense	NM_003567	BCAR3	breast cancer anti-estrogen resistance protein 3 isoform 1	-	94027342	94147394	10.4438	8.12293	3.85039	2.6707	6.42308	13.7053	11.2031	5.78169	10.3123	8.27484	3.37597	3.95904	4.21617	2.4602	2.90363	2.64826
ASHGA5P023108	0.00244979	0.0162818	2.55357	up	noncoding	ENST00000570084	RP11-586K12.10	GENCODE	426	chr16	+	32676973	32677854	ENST00000565847, ENST00000568730	CAGTAAACAGGTACTTTGTATTCTCAAATTGCACCTGCTTACCCTGGCCCCCTCAAAATG	intergenic							815.458	382.119	9.65241	8.2999	853.998	850.325	742.051	417.78	396.46	332.118	9.84008	9.35121	9.76595	8.37174	8.47744	8.05051
ASHGA5P037288	0.00366546	0.0205078	2.4228	up	noncoding	NR_038974	LOC100288432	RefSeq	474	chr21	-	34637936	34638565		CAATGGAAGACAACTCAAGACCACACCAAGTTTGTATTAAAAAAGTACTGTTGTGTTACT	intronic antisense	ENST00000433395	AP000295.9	Uncharacterized protein [Source:UniProtKB/TrEMBL;Acc:H0YHV4]	+	34619078	34655517	133.769	81.9544	7.24737	5.9707	137.764	141.324	122.218	74.366	90.9345	80.5627	7.41839	6.95757	7.36616	5.74026	6.25365	5.91818
ASHGA5P037288	0.00366546	0.0205078	2.4228	up	noncoding	NR_038974	LOC100288432	RefSeq	474	chr21	-	34637936	34638565		CAATGGAAGACAACTCAAGACCACACCAAGTTTGTATTAAAAAAGTACTGTTGTGTTACT	natural antisense	ENST00000404220	IFNAR2	interferon (alpha, beta and omega) receptor 2 [Source:HGNC Symbol;Acc:5433]	+	34602213	34637969	133.769	81.9544	7.24737	5.9707	137.764	141.324	122.218	74.366	90.9345	80.5627	7.41839	6.95757	7.36616	5.74026	6.25365	5.91818
ASHGA5P049899	8.75189e-05	0.00311909	3.45803	up	noncoding	TCONS_00002569	XLOC_001174	LincRNAs identified by Cabili et al	1030	chr1	-	207096851	207097961	TCONS_00001785	AGACAGAGCATAGAGTGCGCACACACACACTCATAGCCACACACCACGCAGTGACACACA	intergenic							127.89	55.6963	7.17131	5.38136	113.873	158.416	111.381	58.1822	58.6481	50.2586	7.1743	7.09881	7.24081	5.37026	5.56591	5.2079
ASHGA5P033289	0.00580667	0.0273358	2.46053	up	noncoding	TCONS_00028426	XLOC_013778	LincRNAs identified by Cabili et al	6563	chr20	-	47100208	47107082		CAAGTTTAAGGGTCGTGGAGTTGGAGATTTGGCGAGAAGTTAAGGCTGCTGTTCTAGTTT	intergenic							11137.9	5320.89	13.429	12.13	11264.3	11589.8	10559.5	5129.8	6743.86	4089.02	13.4636	13.2563	13.567	12.0473	12.5526	11.7901
ASHGA5P022541	0.00469443	0.0239699	2.66767	up	noncoding	uc002bhg.4	AGSK1	UCSC_knowngene	2590	chr15	-	82764077	82798352	ENST00000560405, ENST00000562938, NR_027024, NR_033351, NR_033353, NR_038843, uc002bhh.4, uc002bht.4, uc002bkb.3, uc010blv.3, uc010bmd.3, uc010bmf.3, uc010bml.3, uc010bmv.2, uc010upi.1	GAGCCGCACGGAGATGGAGGAGGACATCTGGACAGTGAGCAGGAGGCGCTTCGGCCCATG	intergenic							12.0009	8.59425	4.0928	2.67721	10.5666	12.4477	12.9886	10.1096	10.6731	5	4.02349	3.83174	4.42316	2.74258	2.94628	2.34278
ASHGA5P045438	0.000688135	0.00797184	2.56927	up	noncoding	TCONS_00015178	XLOC_007231	LincRNAs identified by Cabili et al	1332	chr8	-	134420232	134421667		AAGAACCTCTGGATCACTAAGAATTTCATTGAATCCAGGCATTCCAGCCATTCCAGACAT	intergenic							258.112	135.954	8.09604	6.73469	243.104	295.167	236.064	152.886	135.28	119.696	8.1504	7.9255	8.21223	6.84083	6.85632	6.50691
ASHGA5P057509	0.0433863	0.101757	2.03701	up	noncoding	TCONS_00018403	XLOC_008688	LincRNAs identified by Cabili et al	327	chr10	-	2543966	2544356	TCONS_00018401, TCONS_00018402, TCONS_00018866, TCONS_00018867	GAGGAAACCGCGCTTTGTTGTTGAGGTGAGCCGGGTGCGCGACCACGAGGAAGGATGGCG	intergenic							8.94657	7.95332	3.6567	2.63025	6.03008	8.5147	12.2949	8.8979	8.69298	6.26907	3.29486	3.32491	4.35033	2.65559	2.71757	2.51758
ASHGA5P052459	0.000973661	0.00961649	3.35386	up	noncoding	ENST00000523269	MIR143HG	GENCODE	411	chr5	+	148786440	148801189	ENST00000524265	GGAGGGCCAGCAGCAGGCAGCCCGGAGACAGAACTGTGAGCCCACCCCACCTCCACCCTT	intergenic							1679.43	583.318	10.7007	8.95483	1744.17	1684.18	1609.92	637.317	586.885	525.752	10.8578	10.3469	10.8972	9.01656	9.0806	8.76734
ASHGA5P047569	1.94652e-06	0.000868385	4.74306	up	noncoding	TCONS_00014180	XLOC_006188	LincRNAs identified by Cabili et al	313	chr7	+	99597122	99609247		CATGCCCGGCCCTCCCTTTCTTTTGTGTCTTTGGATTTGTCTTTGTGGAGAGGGTACCAG	intergenic							11988.1	2927.4	13.5417	11.2959	11591.3	13607.7	10765.3	3018.39	2937.84	2825.96	13.5102	13.5075	13.6075	11.2762	11.3772	11.2344
ASHGA5P027426	0.000707633	0.00810612	6.92243	up	noncoding	ENST00000552998	RP11-320P7.1	GENCODE	629	chr12	-	70612911	70615642		GGTAAATGTTCTACTGGTATTTTAAATAATTCTAAAATAAAGTCATTATTTTTCTTTGCA	intergenic							84.4514	21.1152	6.65126	3.85998	90.7038	80.9667	81.6838	16.8324	20.9323	25.581	6.85524	6.25113	6.8474	3.43776	3.97337	4.16881
ASHGA5P018029	0.041669	0.0989902	2.14948	up	noncoding	ENST00000448513	RP11-395B7.4	GENCODE	372	chr7	-	100657605	100660882		TCACTGGGCTGCGGCTGGGAAAAGTGAGACCCAGACGCTCCATCTCAGCTTCCCCATGTG	natural antisense	NM_001164462	MUC12	mucin-12 precursor	+	100612903	100662230	698.497	393.036	9.42532	8.32133	795.916	606.628	692.946	436.296	456.101	286.713	9.73586	8.88224	9.65787	8.44099	8.6912	7.83181
ASHGA5P053081	2.69873e-05	0.00189817	18.3315	up	noncoding	ENST00000459691	EPS15P1	GENCODE	2071	chr7	+	46820970	46823041		GAGAGAAGAGACCTGACAGATTATCTATACTCTTCATATGTTAAAAGACCATTTCCTGTA	intergenic							400.954	31.2733	8.69164	4.49539	394.575	420.461	387.826	33.6396	33.0304	27.1497	8.79289	8.39662	8.88541	4.54005	4.68262	4.26349
ASHGA5P048052	1.2113e-07	0.000410062	4.85542	up	noncoding	TCONS_00017230	XLOC_008047	LincRNAs identified by Cabili et al	355	chrX	+	113214043	113220920		ACATTTTGTTTCTTTCTTGGTTCTCCTACTGCCCACCCTTTCCCCTTGAAATACTGGAGT	intergenic							7894.07	1921.87	12.9492	10.6696	7853.2	8936.72	6892.29	2009.33	1784.77	1971.51	12.9792	12.8958	12.9728	10.6677	10.663	10.6782
ASHGA5P015929	0.00230687	0.0157311	2.80912	up	noncoding	ENST00000424938	ZNF833P	pseudogene	1494	chr19	+	11793360	11797005		TTCCAAAAGAAATCTAAGAAGTCATATGGTAGAGAGAGTCTGAAGGTAAGGAAGATGGTC								14.4204	9.73983	4.30468	2.81456	13.3292	18.6206	11.3113	10.2175	5.36403	13.6379	4.32973	4.35419	4.23011	2.75136	2.48231	3.21001
ASHGA5P031539	0.00521053	0.0255837	2.5882	up	noncoding	ENST00000572811	RP11-490O6.2	GENCODE	2597	chr16	+	11835765	11838362		AAACTTCGAGGGCATTAAGGCAATATGGTGTTATGCCACAAACAGAAGGCACAGCTAACG	natural antisense	NM_015914	TXNDC11	thioredoxin domain-containing protein 11	-	11772942	11836648	12.0464	7.99926	4.00535	2.6334	9.06575	18.7639	8.30937	8.4578	10.54	5	3.81901	4.36716	3.82989	2.62765	2.92978	2.34278
ASHGA5P047146	0.000353914	0.00581604	6.6652	up	noncoding	NR_033847	FLJ37035	RefSeq	2527	chr10	-	127393858	127408062		CAGACTCGGGCAAAATGTTCATATTCTATACGTGAAATGGAATGGTAACTTGATTTTTCA	bidirectional	NM_001202438	C10orf137	erythroid differentiation-related factor 1 isoform 1	+	127408083	127452712	32.6165	7.86425	5.34428	2.60763	21.7601	47.531	28.5584	7.66409	5	10.9287	4.98205	5.57745	5.47334	2.58072	2.34646	2.89572
ASHGA5P047146	0.000353914	0.00581604	6.6652	up	noncoding	NR_033847	FLJ37035	RefSeq	2527	chr10	-	127393858	127408062		CAGACTCGGGCAAAATGTTCATATTCTATACGTGAAATGGAATGGTAACTTGATTTTTCA	bidirectional	NM_015608	C10orf137	erythroid differentiation-related factor 1 isoform 2	+	127408083	127452712	32.6165	7.86425	5.34428	2.60763	21.7601	47.531	28.5584	7.66409	5	10.9287	4.98205	5.57745	5.47334	2.58072	2.34646	2.89572
ASHGA5P033990	0.000134487	0.00374623	3.68581	up	noncoding	ENST00000456623	RP4-669L17.10	GENCODE	1158	chr1	+	324514	326852	ENST00000457006, NR_028322, NR_028324, NR_028326, NR_028327, NR_039983, uc001aam.4, uc002khh.3	TGTACAGTTCTAGCACTGGTTGGAGAACAGCCTCTGCAGGCCCCTCCCTTGCCTCCCAGG	intergenic							11366.3	3534.93	13.4676	11.5856	12102.4	11211.1	10785.3	3653.57	3475.93	3475.29	13.5819	13.2092	13.6116	11.5745	11.6183	11.5639
ASHGA5P056649	0.00129806	0.0112517	3.45294	up	noncoding	TCONS_00006910	XLOC_002727	LincRNAs identified by Cabili et al	559	chr3	+	88387572	88431938		TAGAGTGTGGTGAAATGGCCCAAGGAGAAGAGTACAAAGCAACATAATGGCAGAGATGAT	intergenic							13.8022	5.22584	4.16877	2.38094	11.9902	21.4453	7.97124	5.67752	5	5	4.1911	4.53701	3.7782	2.45359	2.34646	2.34278
ASHGA5P054397	0.0174699	0.054978	2.53393	up	noncoding	ENST00000413288	RP13-16H11.1	GENCODE	413	chr10	+	26938260	26942040	NR_026793	GCATTCACAGGGAGAGGAGTGGAAGACCTTCTGGTGTGGGCTGGGCAGCAATTCACTTGA	intergenic							100.233	60.8795	6.84184	5.50046	77.4666	91.5536	131.678	67.4706	47.6115	67.5564	6.65251	6.40826	7.46474	5.59465	5.24981	5.65693
ASHGA5P015926	0.0026534	0.0169511	2.59539	up	noncoding	ENST00000424921	AP001055.6	GENCODE	475	chr21	-	45578897	45579959		GAGCGGAGGCGGCTGTGCCCAGGACTGCAATGGCCTCCCACACTACCTCACTACCCTGGT	intergenic							520.924	245.556	9.0164	7.64045	617.174	551.297	394.3	246.343	249.585	240.74	9.38763	8.75258	8.909	7.56508	7.7992	7.55708
ASHGA5P015960	0.0386425	0.0938812	3.56351	up	noncoding	ENST00000425214	CCDC144B	GENCODE	576	chr17	-	18494172	18507053	ENST00000433419, NM_014695, NR_023380, NR_036647	TTTATGAGAATTTTATGTTGCTGATGAACAACTTAGAATGGAGTATAAAGATTGATTGCA	intergenic							46.4732	19.5567	5.56591	3.73261	45.5264	80.0436	13.8496	20.0304	24.5386	14.1009	5.95285	6.23904	4.50584	3.71431	4.22352	3.26001
ASHGA5P047956	0.00206627	0.0147119	2.52832	up	noncoding	TCONS_00013475	XLOC_006123	LincRNAs identified by Cabili et al	2028	chr7	+	63831931	63836925		ATCGTGATAGTCATGTGATATAAATTTCATGTGATATAAATCTTTGCCAAGCACCTGTGA	intergenic							128.344	75.6783	7.1902	5.85202	131.281	139.057	114.696	74.8178	83.5215	68.6956	7.35597	6.93586	7.27875	5.75093	6.12294	5.68219
ASHGA5P025634	0.0054627	0.0263285	2.04509	up	noncoding	NR_023312	CIRBP	RefSeq	3312	chr19	+	1269266	1274809		CGACTCAGTGGAAGCGGGGAGAGGTGGTGAGAGATGACCCCTGTTGAGGATTTCATTGGT	exon sense-overlapping	NM_001280	CIRBP	cold-inducible RNA-binding protein	+	1269266	1273171	30.2201	25.7355	5.2232	4.19103	20.7668	46.8183	23.0753	27.8184	22.6933	26.6949	4.92571	5.55757	5.18631	4.23597	4.09941	4.23771
ASHGA5P038796	0.000529055	0.00703064	2.0955	up	noncoding	uc003cri.3	BC067356	UCSC_knowngene	1261	chr3	+	47455557	47457107		AAATCCCAAGAATCCTATGATCCCCATCCCCTCTACCTGCTGAATGGAGTAGAACTTGAT	natural antisense	NM_012235	SCAP	sterol regulatory element-binding protein cleavage-activating protein	-	47455183	47517445	5569.08	3027.73	12.4157	11.3484	5807.08	6030.86	4869.29	3272.89	3003.58	2806.7	12.5451	12.2585	12.4434	11.4086	11.4146	11.2218
ASHGA5P033166	0.00123193	0.0109533	2.87476	up	noncoding	ENST00000572193	RP5-867C24.5	GENCODE	673	chr17	+	45247191	45248415		CTTCATTACCAAAGTGCATCTAACTATGGAGACACAAATTTTTTCTCTCTCTCTCTTTCC	natural antisense	NM_001114091	CDC27	cell division cycle protein 27 homolog isoform 1	-	45195310	45266665	701.479	295.167	9.44374	7.9203	649.411	718.902	736.123	297.866	268.712	318.923	9.46093	9.11938	9.7509	7.85748	7.90847	7.99494
ASHGA5P033166	0.00123193	0.0109533	2.87476	up	noncoding	ENST00000572193	RP5-867C24.5	GENCODE	673	chr17	+	45247191	45248415		CTTCATTACCAAAGTGCATCTAACTATGGAGACACAAATTTTTTCTCTCTCTCTCTTTCC	natural antisense	NM_001256	CDC27	cell division cycle protein 27 homolog isoform 2	-	45195310	45266665	701.479	295.167	9.44374	7.9203	649.411	718.902	736.123	297.866	268.712	318.923	9.46093	9.11938	9.7509	7.85748	7.90847	7.99494
ASHGA5P035864	3.79065e-05	0.00218922	11.985	up	noncoding	ENST00000409590	AC007131.1	GENCODE	2036	chr2	+	59444842	59506535		CCTAATGTGTTAAATGAAGATAATGCCTATCTCACTGTTTTGTGTGTGTGTGTGTGAAAA	intergenic							21819.5	2216.07	14.4592	10.8761	18466.1	23995.8	22996.7	2331.98	2320.32	1995.91	14.2204	14.4189	14.7383	10.8986	11.035	10.6946
ASHGA5P035907	0.00020157	0.00442675	3.5623	up	noncoding	TCONS_00026943	XLOC_013004	LincRNAs identified by Cabili et al	211	chr19	+	20845799	20857891		GGTGTAATTTGTCCAGAGAATCTCAACTGAGAATAAATTCCAGAGAAGGAGGAGAAAGAA	intergenic							12.8827	5	4.17614	2.34333	14.4512	13.7257	10.4714	5	5	5	4.4415	3.96137	4.12554	2.34074	2.34646	2.34278
ASHGA5P014683	0.000724818	0.00820116	20.1041	up	noncoding	ENST00000412431	CTB-89H12.4	GENCODE	3088	chr5	-	148872948	148880816	uc003lqu.3	ACATTTTTCTTTTTTTATTTGAAAACTACTTTAGCAATAATTAATTCCATGATTATCACA	exon sense-overlapping	NM_001025105	CSNK1A1	casein kinase I isoform alpha isoform 1	-	148874844	148931007	7265.94	459.035	12.8161	8.48671	5995.44	8812.26	6990.11	541.185	586.541	249.379	12.5845	12.8743	12.9895	8.76876	9.07935	7.61201
ASHGA5P014683	0.000724818	0.00820116	20.1041	up	noncoding	ENST00000412431	CTB-89H12.4	GENCODE	3088	chr5	-	148872948	148880816	uc003lqu.3	ACATTTTTCTTTTTTTATTTGAAAACTACTTTAGCAATAATTAATTCCATGATTATCACA	exon sense-overlapping	NM_001892	CSNK1A1	casein kinase I isoform alpha isoform 2	-	148874844	148931007	7265.94	459.035	12.8161	8.48671	5995.44	8812.26	6990.11	541.185	586.541	249.379	12.5845	12.8743	12.9895	8.76876	9.07935	7.61201
ASHGA5P022762	0.00041011	0.00622722	3.34696	up	noncoding	ENST00000562349	CTC-420A11.2	GENCODE	714	chr16	+	61952224	61974601		ATGATACTCTGATCGAATTATACTCTGCTCCTTGCCCCATCTAATATTTATTTGCACATT	intronic antisense	NM_001796	CDH8	cadherin-8 preproprotein	-	61685914	62070739	2055.85	706.155	10.9832	9.24031	2190.08	2139.99	1837.46	717.055	726.143	675.268	11.1651	10.709	11.0754	9.18911	9.39677	9.13504
ASHGA5P052037	2.86712e-05	0.00194038	8.12501	up	noncoding	uc003iai.3	BC041964	UCSC_knowngene	4098	chr4	+	113106436	113110534		ACTAATATCCTGAAATAAAACTGGTAATTTATTTGGTTCATGGTATAAAGAATTAGATTG	exon sense-overlapping	NM_152400	C4orf32	uncharacterized protein C4orf32	+	113066552	113110237	2553.85	370.721	11.2825	8.26012	2488.15	2821.76	2351.66	380.626	393.948	337.59	11.3328	11.1195	11.3952	8.23633	8.46955	8.07447
ASHGA5P035587	0.0148838	0.0496655	2.33137	up	noncoding	ENST00000455896	AC009955.8	GENCODE	271	chr2	-	220489780	220491415		CCAAGCCACAAACAAAATTTTTAACTGAAAGAGATGAACTGTCCTCCTAAGTCTCACATG	bidirectional	NM_005070	SLC4A3	anion exchange protein 3 isoform 1	+	220492291	220506702	94.9037	64.2052	6.80487	5.58369	107.511	90.2534	86.9466	50.8628	65.9507	75.8019	7.09498	6.39014	6.92948	5.1687	5.75303	5.82934
ASHGA5P035587	0.0148838	0.0496655	2.33137	up	noncoding	ENST00000455896	AC009955.8	GENCODE	271	chr2	-	220489780	220491415		CCAAGCCACAAACAAAATTTTTAACTGAAAGAGATGAACTGTCCTCCTAAGTCTCACATG	bidirectional	NM_201574	SLC4A3	anion exchange protein 3 isoform 2	+	220492291	220506702	94.9037	64.2052	6.80487	5.58369	107.511	90.2534	86.9466	50.8628	65.9507	75.8019	7.09498	6.39014	6.92948	5.1687	5.75303	5.82934
ASHGA5P019892	4.53593e-05	0.00238852	21.9575	up	noncoding	ENST00000504766	FAM92A1P2	pseudogene	877	chr4	+	183958919	183960291		GACATGTTATTCAAAGGCAGACACAGAATTACAAAGAGCTGCAATGGATGCAACCCGAAC								143.452	10.2616	7.32142	2.86478	119.18	178.214	132.961	15.0166	9.48438	6.28366	7.23172	7.2538	7.47875	3.27626	2.79932	2.51878
ASHGA5P040285	3.00714e-05	0.00199806	4.39769	up	noncoding	TCONS_00022761	XLOC_011044	LincRNAs identified by Cabili et al	725	chr14	-	61108285	61109382		AGACACCTCCTGTCTCCTTCTTCGCTTCCTGGGGTCTTGGCTTTGGTTTTCGGACCCAAA	intergenic							5250.97	1367.75	12.3154	10.1786	4684.5	6912.57	4155.85	1487.43	1316.91	1298.92	12.2455	12.4841	12.2165	10.2358	10.2329	10.0671
ASHGA5P017598	0.00174105	0.0132081	2.63765	up	noncoding	uc003qmb.3	BC043173	UCSC_knowngene	1475	chr6	+	147708803	147711603		GCTACTTGTCTATGTTATTATGTGGTATTTGTTCTCTTGGATTGAAATTTATGCCCACAG	exon sense-overlapping	NM_001127715	STXBP5	syntaxin-binding protein 5 isoform b	+	147525493	147711612	176.235	95.1168	7.58655	6.1873	151.136	216.7	160.868	102.102	105.314	77.9344	7.53669	7.4929	7.73006	6.22333	6.46786	5.8707
ASHGA5P017598	0.00174105	0.0132081	2.63765	up	noncoding	uc003qmb.3	BC043173	UCSC_knowngene	1475	chr6	+	147708803	147711603		GCTACTTGTCTATGTTATTATGTGGTATTTGTTCTCTTGGATTGAAATTTATGCCCACAG	exon sense-overlapping	NM_139244	STXBP5	syntaxin-binding protein 5 isoform a	+	147525493	147711612	176.235	95.1168	7.58655	6.1873	151.136	216.7	160.868	102.102	105.314	77.9344	7.53669	7.4929	7.73006	6.22333	6.46786	5.8707
ASHGA5P033594	0.00357488	0.0201622	4.65911	up	noncoding	ENST00000435793	RP11-261C10.3	GENCODE	774	chr1	-	243260175	243265035		GCCAGGAGCATTTTACAAGTCATGTTACAGACATTGTTTAAACATAGTCTGTATTTACCA	intergenic							102.257	36.5026	6.89507	4.67502	105.018	114.281	87.4735	41.7285	44.7918	22.9875	7.0621	6.68542	6.9377	4.86334	5.15464	4.00707
ASHGA5P016977	0.000182775	0.00426269	7.62475	up	noncoding	ENST00000436174	AC027612.3	GENCODE	1145	chr2	-	91874127	91900136	uc009wkv.1	TTCAAGGGATGGTGATATGGATGATAGTCGAGACACAGCCGCTGTCGCTGCCATCTGGCG	intergenic							165.489	32.957	7.49815	4.56746	163.83	201.817	130.82	29.6148	39.9818	29.2746	7.63836	7.39964	7.45644	4.33993	4.98205	4.38039
ASHGA5P015548	0.00162598	0.0127578	2.53288	up	noncoding	ENST00000421275	RP11-148G20.1	GENCODE	196	chr3	+	48701208	48706607		GAAGACCAGGAGACGGGAGCTGGAGTGCAGTGGCTGTTCACAAGCGTGAAAGCAAAGATT	intronic antisense	ENST00000341520	NCKIPSD	NCK interacting protein with SH3 domain [Source:HGNC Symbol;Acc:15486]	-	48701363	48723334	54.8458	35.8182	6.04335	4.70257	38.1756	72.7575	53.6044	40.7033	31.5941	35.1573	5.72724	6.11823	6.28458	4.82573	4.61505	4.66694
ASHGA5P007359	3.73047e-05	0.00218549	2.99466	up	noncoding	ENST00000331787	TTTY14	GENCODE	515	chrY	-	21094584	21239302		TTCGAATCCCAGCTTGGTGGCATGCATGTTTAGTCCCAGCTACACAGCAGGGAGGCTGAG	intron sense-overlapping	NM_013230	CD24	signal transducer CD24 precursor	-	21152525	21154705	2137.53	813.045	11.0219	9.43947	2075.62	2717.24	1619.72	821.936	719.383	897.817	11.0969	11.0638	10.9048	9.39239	9.3813	9.54474
ASHGA5P056937	0.00405887	0.0219083	2.14222	up	noncoding	TCONS_00010747	XLOC_004478	LincRNAs identified by Cabili et al	657	chr5	+	95179751	95183829		TGGGTTTGAGGTAAGAAGATGATGGTCATGGATTTTGCAGTACATCTCTGTGCCTCTCAA	intergenic							50.8042	40.2456	5.9824	4.8833	56.329	50.8892	45.1943	44.0692	34.1628	42.505	6.22884	5.65596	6.0624	4.94924	4.73618	4.96448
ASHGA5P017482	0.0188462	0.0577437	2.73807	up	noncoding	ENST00000442213	AC093642.5	GENCODE	752	chr2	+	243030846	243101633		ATGACACAAATACTCAAACTGATCCATATGAATTCCTCTTATTAAGAAAAATAAAGCATC	intergenic							18.4414	13.0701	4.6155	3.16233	19.3191	23.7998	12.2053	13.7576	18.5281	6.92458	4.8282	4.67848	4.33981	3.13958	3.78371	2.56372
ASHGA5P043409	0.00108429	0.010106	3.65736	up	noncoding	ENST00000488041	RP4-798C17.6	GENCODE	558	chr7	-	144008975	144053274	ENST00000498693	AGTATGCAAATACCTATGGAGATACATAAGGAAAGGCCCCGGCCTGGTTAAGGAAAAGGA	intronic antisense	NM_001001802	OR2A42	olfactory receptor 2A1/2A42	+	144015217	144016150	45.7233	22.6395	5.84368	3.97288	39.9809	52.9918	44.1973	27.1651	23.3995	17.3539	5.78324	5.71377	6.03404	4.19781	4.14575	3.57507
ASHGA5P043409	0.00108429	0.010106	3.65736	up	noncoding	ENST00000488041	RP4-798C17.6	GENCODE	558	chr7	-	144008975	144053274	ENST00000498693	AGTATGCAAATACCTATGGAGATACATAAGGAAAGGCCCCGGCCTGGTTAAGGAAAAGGA	intronic antisense	NM_001005287	OR2A1	olfactory receptor 2A1/2A42	+	144015217	144016150	45.7233	22.6395	5.84368	3.97288	39.9809	52.9918	44.1973	27.1651	23.3995	17.3539	5.78324	5.71377	6.03404	4.19781	4.14575	3.57507
ASHGA5P043409	0.00108429	0.010106	3.65736	up	noncoding	ENST00000488041	RP4-798C17.6	GENCODE	558	chr7	-	144008975	144053274	ENST00000498693	AGTATGCAAATACCTATGGAGATACATAAGGAAAGGCCCCGGCCTGGTTAAGGAAAAGGA	intronic antisense	NM_005435	ARHGEF5	rho guanine nucleotide exchange factor 5	+	144052488	144077725	45.7233	22.6395	5.84368	3.97288	39.9809	52.9918	44.1973	27.1651	23.3995	17.3539	5.78324	5.71377	6.03404	4.19781	4.14575	3.57507
ASHGA5P035242	0.00288319	0.0177442	3.87308	up	noncoding	TCONS_00016565	XLOC_007326	LincRNAs identified by Cabili et al	1451	chr9	+	33730334	33749410		TTCTTTTAATAGTGTGCACAGGGTTGACGGGAAACACACACACACTGTGCAGAACCATTC	intergenic							16.7893	5.72974	4.41335	2.45987	9.2521	26.3647	14.7511	5	6.46518	5.72403	3.8421	4.81447	4.58348	2.34074	2.56289	2.47597
ASHGA5P014838	0.0278217	0.0749242	2.43031	up	noncoding	ENST00000413897	BX571672.2	GENCODE	1109	chr1	-	143186761	143196803	ENST00000420598, ENST00000448844, ENST00000451663	ACTACTTGACTGAGATGGGGCCGGACTGTGTAGAATAAATAATTAGAGAAACAAAGAGAA	intergenic							16.1803	13.0741	4.45464	3.1735	12.6028	21.1426	14.7956	7.21368	18.9648	13.0439	4.25841	4.5181	4.5874	2.55382	3.81992	3.14675
ASHGA5P057538	0.00117902	0.010615	2.80461	up	noncoding	TCONS_00018622	XLOC_008975	LincRNAs identified by Cabili et al	618	chr10	-	124130696	124133962		TCAGAGAGAGTGGCAAGTGCCTACAACAGAAGTATGTGTTGAATGATGAATGCCACAGTC	intergenic							16.5244	12.0583	4.5141	3.0263	17.8748	17.063	14.6354	13.3926	12.5067	10.2756	4.72931	4.24246	4.57052	3.09499	3.17209	2.81181
ASHGA5P045525	0.00057538	0.00736921	4.70841	up	noncoding	ENST00000420546	RP13-100B2.4	GENCODE	429	chr9	-	136333981	136335880		TTGCTTAAGACGCACACAGAACACAGAGGAACAAACAAGGAGGAAAGGGCGCCACACACA	natural antisense	NM_001135775	CACFD1	calcium channel flower homolog isoform b	+	136325086	136335909	28.7614	11.438	5.23128	2.99604	29.8632	33.9287	22.4925	14.5465	12.5911	7.17632	5.40057	5.13941	5.15386	3.22633	3.18156	2.58023
ASHGA5P045525	0.00057538	0.00736921	4.70841	up	noncoding	ENST00000420546	RP13-100B2.4	GENCODE	429	chr9	-	136333981	136335880		TTGCTTAAGACGCACACAGAACACAGAGGAACAAACAAGGAGGAAAGGGCGCCACACACA	natural antisense	NM_001242369	CACFD1	calcium channel flower homolog isoform c	+	136325086	136335909	28.7614	11.438	5.23128	2.99604	29.8632	33.9287	22.4925	14.5465	12.5911	7.17632	5.40057	5.13941	5.15386	3.22633	3.18156	2.58023
ASHGA5P045525	0.00057538	0.00736921	4.70841	up	noncoding	ENST00000420546	RP13-100B2.4	GENCODE	429	chr9	-	136333981	136335880		TTGCTTAAGACGCACACAGAACACAGAGGAACAAACAAGGAGGAAAGGGCGCCACACACA	natural antisense	NM_001242370	CACFD1	calcium channel flower homolog isoform d	+	136325086	136335909	28.7614	11.438	5.23128	2.99604	29.8632	33.9287	22.4925	14.5465	12.5911	7.17632	5.40057	5.13941	5.15386	3.22633	3.18156	2.58023
ASHGA5P045525	0.00057538	0.00736921	4.70841	up	noncoding	ENST00000420546	RP13-100B2.4	GENCODE	429	chr9	-	136333981	136335880		TTGCTTAAGACGCACACAGAACACAGAGGAACAAACAAGGAGGAAAGGGCGCCACACACA	natural antisense	NM_017586	CACFD1	calcium channel flower homolog isoform a	+	136325086	136335909	28.7614	11.438	5.23128	2.99604	29.8632	33.9287	22.4925	14.5465	12.5911	7.17632	5.40057	5.13941	5.15386	3.22633	3.18156	2.58023
ASHGA5P031365	0.000157904	0.0040116	3.50572	up	noncoding	ENST00000568458	RP11-558A11.3	GENCODE	469	chr16	-	84376069	84377013		AGTCCCAAAAGCCTTGCTTCCTTCCTTTCTCCTGGATAACCCACCTCTGCCTGCCACAGA	intergenic							3540.7	1160.13	11.7419	9.93217	3235.17	4390.39	2996.55	1356.56	1136.37	987.459	11.6985	11.7854	11.7417	10.1042	10.0111	9.68126
ASHGA5P047389	0.000365715	0.00586507	7.61977	up	noncoding	uc001alp.1	AK125078	UCSC_knowngene	847	chr1	-	5621768	5728315	ENST00000413887	GAGCTGGCCGTGAGCCGCTGGTGCAGGGGAGGGAGACGGCTGTGAGACGCTGGAGTGCAG	intergenic							46.593	10.0401	5.73347	2.80372	33.9744	78.4471	27.3576	12.3676	7.83429	9.91846	5.57146	6.21153	5.41742	2.98831	2.65221	2.77064
ASHGA5P018872	0.000329134	0.00557828	3.86988	up	noncoding	ENST00000458645	AC073871.2	GENCODE	738	chr7	-	156376853	156433286		CTAGACGCAGGTGACCAGCATCATGTCCCACCGGGTCCCCTGCAGTCCCAGTGCACCTGC	exon sense-overlapping	ENST00000333319	C7orf13	chromosome 7 open reading frame 13 [Source:HGNC Symbol;Acc:17126]	-	156431056	156433348	410.327	139.087	8.72096	6.76867	440.191	424.16	366.631	155.762	119.583	141.915	8.93664	8.40979	8.81647	6.87172	6.66586	6.76844
ASHGA5P018872	0.000329134	0.00557828	3.86988	up	noncoding	ENST00000458645	AC073871.2	GENCODE	738	chr7	-	156376853	156433286		CTAGACGCAGGTGACCAGCATCATGTCCCACCGGGTCCCCTGCAGTCCCAGTGCACCTGC	intronic antisense	ENST00000404282	RNF32	ring finger protein 32 [Source:HGNC Symbol;Acc:17118]	+	156432974	156451243	410.327	139.087	8.72096	6.76867	440.191	424.16	366.631	155.762	119.583	141.915	8.93664	8.40979	8.81647	6.87172	6.66586	6.76844
ASHGA5P023100	0.000636715	0.00772611	2.24003	up	noncoding	ENST00000569859	RP11-67H24.2	GENCODE	601	chr16	+	32820876	32835966	ENST00000564165	CCTGCCCAAGATGCTGTCATCTATATGATCTCAGTATTTTAAAAATCAGCTTCCAGCCCA	intergenic							117.868	78.3108	7.06717	5.90365	112.975	146.525	94.1045	72.311	80.7297	81.8916	7.16487	7.0026	7.03403	5.69716	6.06962	5.94418
ASHGA5P053551	0.0110339	0.0410932	2.34773	up	noncoding	ENST00000518639	RP11-158K1.3	GENCODE	2355	chr8	+	125500750	125503884		AAATACTTTAATAGTATTGTTATATAGTGTATTGGCTAATTCCAGTGGATCCTCATCTCT	exon sense-overlapping	NM_007218	RNF139	E3 ubiquitin-protein ligase RNF139	+	125487007	125500859	715.053	365.756	9.46451	8.23324	799.088	688.577	657.495	362.379	423.197	311.691	9.74167	9.06144	9.59042	8.15978	8.57903	7.96091
ASHGA5P053551	0.0110339	0.0410932	2.34773	up	noncoding	ENST00000518639	RP11-158K1.3	GENCODE	2355	chr8	+	125500750	125503884		AAATACTTTAATAGTATTGTTATATAGTGTATTGGCTAATTCCAGTGGATCCTCATCTCT	natural antisense	NM_001146160	TATDN1	putative deoxyribonuclease TATDN1 isoform b	-	125500734	125551329	715.053	365.756	9.46451	8.23324	799.088	688.577	657.495	362.379	423.197	311.691	9.74167	9.06144	9.59042	8.15978	8.57903	7.96091
ASHGA5P053551	0.0110339	0.0410932	2.34773	up	noncoding	ENST00000518639	RP11-158K1.3	GENCODE	2355	chr8	+	125500750	125503884		AAATACTTTAATAGTATTGTTATATAGTGTATTGGCTAATTCCAGTGGATCCTCATCTCT	natural antisense	NM_032026	TATDN1	putative deoxyribonuclease TATDN1 isoform a	-	125500734	125551329	715.053	365.756	9.46451	8.23324	799.088	688.577	657.495	362.379	423.197	311.691	9.74167	9.06144	9.59042	8.15978	8.57903	7.96091
ASHGA5P048845	0.0481638	0.109594	8.7392	up	noncoding	ENST00000544685	RP11-752G15.6	GENCODE	594	chr15	+	83419315	83423689	ENST00000558687	TTGCAGTATAGCCACTGAAGTAATCTAAAAGAGGTGAGTGTGGCACTTAACCTCTCCTGG	intergenic							512.309	116.753	9.01097	5.88347	524.441	545.548	466.937	153.65	17.4281	179.181	9.17095	8.7356	9.12635	6.85092	3.68257	7.1169
ASHGA5P023785	0.00332086	0.0193037	2.05932	up	noncoding	HMlincRNA420-	HMlincRNA420	LincRNAs identified by Khalil et al	5457	chr5	-	92312320	92317777		CCCCAACCTCCCTGGTAACCATCATTGTAATATTGCTCATATAGCATTTGAGTTTTCTTC	intergenic							704.777	404.422	9.42304	8.38088	617.75	912.783	583.798	471.561	409.562	332.142	9.38886	9.45626	9.42401	8.56307	8.52875	8.05082
ASHGA5P051267	0.00541118	0.0261968	2.21224	up	noncoding	ENST00000566814	CTA-445C9.14	GENCODE	2032	chr22	+	26908502	26910534		TGATGAAAAGATTCAAGAGGCAATTGTTGGAATGTAAAAAGAGCACGGGACTTGGAGTCA	bidirectional	NM_001008697	TFIP11	tuftelin-interacting protein 11	-	26887893	26908437	25.473	20.4184	4.98065	3.83514	19.9187	40.2461	16.2541	21.829	20.5996	18.8266	4.87241	5.36192	4.70763	3.85661	3.9473	3.70153
ASHGA5P051267	0.00541118	0.0261968	2.21224	up	noncoding	ENST00000566814	CTA-445C9.14	GENCODE	2032	chr22	+	26908502	26910534		TGATGAAAAGATTCAAGAGGCAATTGTTGGAATGTAAAAAGAGCACGGGACTTGGAGTCA	bidirectional	NM_012143	TFIP11	tuftelin-interacting protein 11	-	26887893	26908437	25.473	20.4184	4.98065	3.83514	19.9187	40.2461	16.2541	21.829	20.5996	18.8266	4.87241	5.36192	4.70763	3.85661	3.9473	3.70153
ASHGA5P021647	0.00328699	0.0191918	2.21613	up	noncoding	NR_045667	ACSF3	RefSeq	2413	chr16	+	89202955	89222171		AAGGTCTGTTTCAGTGATCGCAAGTTGCCCTGGAGCCCTCTGAACCTTCTGAGTCGCCCT	exon sense-overlapping	NM_001127214	ACSF3	acyl-CoA synthetase family member 3, mitochondrial precursor	+	89160216	89222171	408.835	235.058	8.71686	7.56881	411.841	412.129	402.537	263.335	210.51	231.328	8.84711	8.36888	8.93459	7.66571	7.54391	7.49683
ASHGA5P021647	0.00328699	0.0191918	2.21613	up	noncoding	NR_045667	ACSF3	RefSeq	2413	chr16	+	89202955	89222171		AAGGTCTGTTTCAGTGATCGCAAGTTGCCCTGGAGCCCTCTGAACCTTCTGAGTCGCCCT	exon sense-overlapping	NM_001243279	ACSF3	acyl-CoA synthetase family member 3, mitochondrial precursor	+	89160216	89222171	408.835	235.058	8.71686	7.56881	411.841	412.129	402.537	263.335	210.51	231.328	8.84711	8.36888	8.93459	7.66571	7.54391	7.49683
ASHGA5P021647	0.00328699	0.0191918	2.21613	up	noncoding	NR_045667	ACSF3	RefSeq	2413	chr16	+	89202955	89222171		AAGGTCTGTTTCAGTGATCGCAAGTTGCCCTGGAGCCCTCTGAACCTTCTGAGTCGCCCT	exon sense-overlapping	NM_174917	ACSF3	acyl-CoA synthetase family member 3, mitochondrial precursor	+	89160216	89222171	408.835	235.058	8.71686	7.56881	411.841	412.129	402.537	263.335	210.51	231.328	8.84711	8.36888	8.93459	7.66571	7.54391	7.49683
ASHGA5P050886	0.0347269	0.0870117	2.05228	up	noncoding	ENST00000426962	AC093642.3	GENCODE	430	chr2	+	242913428	242914075		GGGAGGGGGCATTTCAACCTGTTAATTTCTCAAATTATGTAGTCATTCAAAAAGAAATAG	intergenic							29.1755	26.566	5.26454	4.22731	33.4364	25.0403	29.0499	21.3982	28.9975	29.3024	5.54857	4.74722	5.49784	3.82244	4.47764	4.38187
ASHGA5P032266	5.99294e-05	0.00270648	3.12018	up	noncoding	ENST00000584759	KRT16P3	GENCODE	681	chr17	-	20404825	20405600	ENST00000577750, ENST00000578023	CTGCCCTGGAGTTGGCTTAGCTCTCAGACCCCTTCTCACCTCCTCTTCTCTCTCCCACAG	intergenic							22861.9	8798.23	14.5407	12.8991	24527.4	23589.2	20469.1	9142.76	9156.8	8095.13	14.6396	14.3874	14.5952	12.9026	12.985	12.8097
ASHGA5P037761	8.39744e-05	0.00309699	4.29536	up	noncoding	ENST00000414483	LL22NC03-121E8.4	GENCODE	498	chr22	-	48535277	48536818		CATCTTCCTCAGACTCCAGCAGGCCCTCCACTCCTAGCACACAGGCCGGATTGAATCTTC	intergenic							5699.35	1526.63	12.4399	10.3372	6032.75	6685.34	4379.95	1655.09	1546.61	1378.18	12.604	12.4234	12.2924	10.3969	10.4593	10.1553
ASHGA5P033349	0.000113206	0.00345962	3.42669	up	noncoding	ENST00000583712	RP11-449L23.3	GENCODE	1562	chr17	+	71515984	71517546		AGACTGGGCTGCTCCCTCTGAGCATCTAGAAACTTCCCCAGAAGCAGAAGCTTCAGGCAG	intronic antisense	NM_001144952	SDK2	protein sidekick-2 precursor	-	71330522	71640227	4661.53	1569	12.1576	10.3808	4952.28	4954.23	4078.09	1620.58	1567.45	1518.96	12.3224	11.9574	12.1931	10.3647	10.4744	10.3034
ASHGA5P055648	3.04779e-05	0.00199963	2.36531	up	noncoding	uc009vov.2	CROCCP2	UCSC_knowngene	1968	chr1	-	16944750	16957604	ENST00000362058, ENST00000412962, ENST00000421700, uc001aze.3, uc001azf.3, uc001azg.1	ACTCCACGCTCGCTTGCCCTGATTCTCTCCGCCCTGCACTTTTGCCAGCTGAAGGTCCAG	intergenic							2797.22	1348.04	11.3988	10.1568	2718.08	3289.01	2384.56	1463.41	1289.27	1291.44	11.4453	11.3347	11.4165	10.2161	10.1948	10.0595
ASHGA5P000038	5.40467e-05	0.00260732	7.07427	up	noncoding	AK022427R		LincRNAs identified by Khalil et al	2554	chr5	+	82323780	82326924		TTATTAATTACATTGAACAGTAGTGTGTACAATAAATATCTTGGATATTTACGAAGCTTT	intergenic							29.9445	5.83045	5.26025	2.43767	22.2829	40.8773	26.6732	5	7.49134	5	5.01569	5.38248	5.38259	2.34074	2.6295	2.34278
ASHGA5P033442	0.0120999	0.043588	2.44668	up	noncoding	ENST00000493812	LGALS8-AS1	GENCODE	1430	chr1	-	236686370	236687800		CTGTAAACACACCAGCCAGAAATACAAATAAAGTTAAACAAAGTCATGTCAGCCACTTGG	intronic antisense	NM_201545	LGALS8	galectin-8 isoform a	+	236681513	236716279	85.6323	56.4086	6.66737	5.37654	89.2678	89.6823	77.9467	41.7268	63.5756	63.9235	6.83363	6.38195	6.78652	4.86309	5.69699	5.56954
ASHGA5P033442	0.0120999	0.043588	2.44668	up	noncoding	ENST00000493812	LGALS8-AS1	GENCODE	1430	chr1	-	236686370	236687800		CTGTAAACACACCAGCCAGAAATACAAATAAAGTTAAACAAAGTCATGTCAGCCACTTGG	natural antisense	NM_006499	LGALS8	galectin-8 isoform a	+	236686738	236716279	85.6323	56.4086	6.66737	5.37654	89.2678	89.6823	77.9467	41.7268	63.5756	63.9235	6.83363	6.38195	6.78652	4.86309	5.69699	5.56954
ASHGA5P033442	0.0120999	0.043588	2.44668	up	noncoding	ENST00000493812	LGALS8-AS1	GENCODE	1430	chr1	-	236686370	236687800		CTGTAAACACACCAGCCAGAAATACAAATAAAGTTAAACAAAGTCATGTCAGCCACTTGG	natural antisense	NM_201543	LGALS8	galectin-8 isoform b	+	236686738	236716279	85.6323	56.4086	6.66737	5.37654	89.2678	89.6823	77.9467	41.7268	63.5756	63.9235	6.83363	6.38195	6.78652	4.86309	5.69699	5.56954
ASHGA5P033442	0.0120999	0.043588	2.44668	up	noncoding	ENST00000493812	LGALS8-AS1	GENCODE	1430	chr1	-	236686370	236687800		CTGTAAACACACCAGCCAGAAATACAAATAAAGTTAAACAAAGTCATGTCAGCCACTTGG	natural antisense	NM_201544	LGALS8	galectin-8 isoform b	+	236687026	236716279	85.6323	56.4086	6.66737	5.37654	89.2678	89.6823	77.9467	41.7268	63.5756	63.9235	6.83363	6.38195	6.78652	4.86309	5.69699	5.56954
ASHGA5P029524	0.00734688	0.0317719	2.41838	up	noncoding	ENST00000554328	RP11-111A21.1	GENCODE	582	chr14	+	39944043	39982984	ENST00000555555	AAAGTGGAACGTGGAAAAAACAGAGTAAAACTAGTTTGAGAATAAAATCTTAGGTTGTAA	intergenic							216.765	123.012	7.85622	6.58218	250.636	212.964	186.695	109.213	131.804	128.02	8.18717	7.4698	7.91167	6.32065	6.81494	6.61094
ASHGA5P049928	0.045739	0.105651	2.58702	up	noncoding	ENST00000585150	RP11-806L2.2	GENCODE	2106	chr18	+	650228	652843		AAGACCAATAGGTTCTGTATAGTCTTTTTTTAAATTGTGGTAAAATACACATGGCATTAA	exon sense-overlapping	NM_014410	CLUL1	clusterin-like protein 1 precursor	+	596997	650293	15.842	11.8766	4.38676	3.01547	9.15768	17.6805	20.6877	9.36985	17.1704	9.08939	3.83029	4.28658	5.04341	2.68407	3.66064	2.70171
ASHGA5P049928	0.045739	0.105651	2.58702	up	noncoding	ENST00000585150	RP11-806L2.2	GENCODE	2106	chr18	+	650228	652843		AAGACCAATAGGTTCTGTATAGTCTTTTTTTAAATTGTGGTAAAATACACATGGCATTAA	exon sense-overlapping	NM_199167	CLUL1	clusterin-like protein 1 precursor	+	616699	650293	15.842	11.8766	4.38676	3.01547	9.15768	17.6805	20.6877	9.36985	17.1704	9.08939	3.83029	4.28658	5.04341	2.68407	3.66064	2.70171
ASHGA5P049928	0.045739	0.105651	2.58702	up	noncoding	ENST00000585150	RP11-806L2.2	GENCODE	2106	chr18	+	650228	652843		AAGACCAATAGGTTCTGTATAGTCTTTTTTTAAATTGTGGTAAAATACACATGGCATTAA	intronic antisense	NM_001012716	C18orf56	putative uncharacterized protein C18orf56	-	649619	658340	15.842	11.8766	4.38676	3.01547	9.15768	17.6805	20.6877	9.36985	17.1704	9.08939	3.83029	4.28658	5.04341	2.68407	3.66064	2.70171
ASHGA5P040420	0.0346775	0.0869101	2.6723	up	noncoding	uc003jms.1	AK000840	UCSC_knowngene	1916	chr5	-	42155934	42175356		AATGCATACATTGTATCAGAAATTATCTCCCATATTGATGAGTCTTCCATGGGCATCTAA	intergenic							677.9	274.167	9.22275	7.80466	910.929	854.949	267.823	289.27	242.067	291.165	9.92592	9.35731	8.38502	7.81184	7.74924	7.85292
ASHGA5P018232	0.000564706	0.0073	4.78437	up	noncoding	ENST00000450980	RP11-672F9.1	GENCODE	425	chr10	+	38536849	38622083		TTGGTAGGAGAATTGCCCTGGTGGAAAATATTCCTGAAGGCCTTAACTATTCAGAAAATG	intergenic							52.492	19.7908	6.03172	3.77339	54.0978	54.2837	49.0944	20.457	22.5403	16.375	6.17562	5.74474	6.17479	3.74941	4.08734	3.48341
ASHGA5P032902	0.00428949	0.0227413	2.05842	up	noncoding	ENST00000584769	KRT17P2	GENCODE	826	chr17	+	18331485	18333938		AGATCTGTTCAGAACTCTGGTGTGGGCTCAGCCACCCCCATCCGATGACCTGACTACTCT	intergenic							130.109	93.2708	7.21504	6.1735	129.558	134.934	125.834	97.1411	95.0179	87.6533	7.33906	6.89545	7.4106	6.15616	6.31392	6.05041
ASHGA5P017783	0.000344277	0.00570723	2.85908	up	noncoding	ENST00000445682	GUSBP11	GENCODE	3350	chr22	-	23980673	24059543	ENST00000421064, ENST00000422506, ENST00000451837, uc002zxk.4, uc002zxl.4, uc002zxm.3	TTTATCCCTTTATCTGTGCATGAACAGTGCAGGCCAAGGCCCCCTGCCCATGGAGGTGTG	natural antisense	NM_153615	RGL4	ral-GDS-related protein precursor	+	24033047	24041363	576.839	247.861	9.17028	7.65473	598.849	621.662	510.006	254.173	234.531	254.879	9.34869	8.91503	9.24711	7.61374	7.70428	7.64617
ASHGA5P051531	0.00247808	0.0163824	2.32655	up	noncoding	ENST00000430014	AL592284.1	GENCODE	2073	chr1	-	144456137	144521291	ENST00000426301, ENST00000440084	GTGAGGGGTGTGCGCGCTTGAGCCGGAGCGGGGCTCGCCCCTCGTCGACTCCCGCCGCCC	natural antisense	ENST00000538264	AL592284.2	Uncharacterized protein [Source:UniProtKB/TrEMBL;Acc:F5H305]	+	144339737	144521058	30.8198	24.8312	5.32874	4.11055	28.0324	37.417	27.0101	27.166	18.4069	28.9207	5.32176	5.26507	5.3994	4.19799	3.77233	4.36133
ASHGA5P058806	0.0049666	0.0248166	2.83345	up	noncoding	uc.115-	uc.115	UCR	219	chr3	-	19034157	19034376		CCCTCCTTCTCTGAGTTCAGCAACTAATTATATTTTTAAATAATGGCTACCATTGAACAC	intergenic							459.401	207.303	8.87132	7.36876	462.121	461.525	454.557	231.803	226.481	163.623	8.99921	8.52354	9.09121	7.47485	7.6535	6.97794
ASHGA5P056798	0.000101217	0.00331894	5.70829	up	noncoding	TCONS_00008738	XLOC_003422	LincRNAs identified by Cabili et al	992	chr4	+	1548980	1550300	TCONS_00008739	CCTGGCCCAGGCCAGCAAAGACAATCGCCGGATGTCTGAGTACCCCCTCTCCTTCCAAAA	intergenic							22794.4	4850.01	14.5309	12.0178	24813	22244.8	21325.5	5053.87	5263.23	4232.93	14.6672	14.2742	14.6513	12.0177	12.1894	11.8464
ASHGA5P055976	2.47916e-05	0.00184244	20.3595	up	noncoding	NR_038280	LOC100506963	RefSeq	1084	chr1	-	24086871	24104787		AGGTGCCAGAGTTCGTATATGACTCCAGTCCTGGCGCTGGATGCTGCTGCTGTTCCAGCT	natural antisense	NM_003198	TCEB3	transcription elongation factor B polypeptide 3	+	24069855	24088549	1994.78	125.24	10.9513	6.60363	1861.54	2056.39	2066.42	149.08	109.764	116.875	10.9558	10.6579	11.2401	6.80465	6.53438	6.47185
ASHGA5P023261	0.00219012	0.0151989	2.69491	up	noncoding	ENST00000576476	RP1-302G2.5	GENCODE	682	chr6	+	44184698	44185835		ATTGGTGGGGGCACTGACTCACTGGCCCTGCCATGCCCACGCCACTGCTCCCGCTGCTGC	intergenic							642.578	288.587	9.31889	7.88865	667.746	628.122	631.866	302.72	283.733	279.309	9.49695	8.92767	9.53206	7.88463	7.991	7.79033
ASHGA5P023102	0.00960746	0.0376059	2.32773	up	noncoding	ENST00000569922	LA16c-390E6.5	GENCODE	289	chr16	+	1495343	1496365		TTGCTCTAACAGGGACACTGAAGGCTCTGTCTCACGCACACGGGCACAGGCACGCAGGTG	natural antisense	NM_001114331	CLCN7	H(+)/Cl(-) exchange transporter 7 isoform b	-	1494933	1525085	112.513	73.4202	7.02441	5.80549	115.93	104.33	117.278	79.0138	77.22	64.0267	7.19623	6.56935	7.30766	5.84295	6.00127	5.57225
ASHGA5P023102	0.00960746	0.0376059	2.32773	up	noncoding	ENST00000569922	LA16c-390E6.5	GENCODE	289	chr16	+	1495343	1496365		TTGCTCTAACAGGGACACTGAAGGCTCTGTCTCACGCACACGGGCACAGGCACGCAGGTG	natural antisense	NM_001287	CLCN7	H(+)/Cl(-) exchange transporter 7 isoform a	-	1494933	1525085	112.513	73.4202	7.02441	5.80549	115.93	104.33	117.278	79.0138	77.22	64.0267	7.19623	6.56935	7.30766	5.84295	6.00127	5.57225
ASHGA5P043520	0.00138029	0.0116169	5.4339	up	noncoding	ENST00000425837	AC004160.4	GENCODE	563	chr7	+	11446581	11453705		GTTGGTATTTGACCCAGTGGACCTCAGATGCATGGAGAGTCAACATTTGTCATGTTTTTG	natural antisense	NM_015204	THSD7A	thrombospondin type-1 domain-containing protein 7A precursor	-	11410061	11871824	75.5496	24.2996	6.51074	4.06875	69.897	72.8427	83.9089	23.3293	18.2971	31.2725	6.52692	6.12159	6.8837	3.95761	3.76228	4.48636
ASHGA5P022381	0.00265099	0.0169511	2.52129	up	noncoding	ENST00000555797	CTD-3006G17.2	GENCODE	411	chr14	-	27791284	28314492		TCTCATTAAGGTTTTGGTATGAAGATGATGCTGGTCTCATAGATGATGATGCTGGTCTCA	intergenic							30.9356	21.4042	5.23714	3.90297	23.926	49.0321	19.8487	21.9702	18.9084	23.334	5.11263	5.61045	4.98833	3.86703	3.81463	4.02725
ASHGA5P046196	5.7933e-05	0.00267825	5.80503	up	noncoding	ENST00000433646	RP11-236P24.3	GENCODE	615	chrX	-	53122891	53124040		TATATCTACTACGTCTCAAAAAGTGGGACAGAGACAGAGATGGGAGAGGGGATGCAAAGA	intergenic							31.1968	10.1775	5.35082	2.81352	26.3177	36.6876	30.5851	12.4038	8.48061	9.64821	5.24181	5.23989	5.57076	2.99186	2.70192	2.74677
ASHGA5P020537	0.000957423	0.00951113	3.5758	up	noncoding	ENST00000515467	SDHAP3	pseudogene	747	chr5	-	1572336	1593404		CTGGGAAGGTCAGTGTGGGTCACCCTGGGATATAGACCCGTAATCGACAAAACTTTGAAC								516.162	175.043	8.94215	7.10389	431.183	786.947	330.357	178.048	138.912	208.171	8.90813	9.2465	8.67182	7.07215	6.8973	7.3422
ASHGA5P018440	0.00733337	0.0317317	2.06969	up	noncoding	ENST00000453584	DCUN1D2-AS2	GENCODE	319	chr13	+	114129704	114130450		ACCACAGACGAGCCTCCTCTTCCCTCCGGTGAGGCATGGACAATCAGACTTCTGGGCCAG	intronic antisense	NM_001014283	DCUN1D2	DCN1-like protein 2	-	114110133	114145023	2779.48	1546.53	11.402	10.3526	2916.26	2739.48	2682.7	1594.51	1687.09	1358	11.5418	11.0774	11.5869	10.3409	10.5841	10.1328
ASHGA5P050180	0.000554438	0.00719783	5.72037	up	noncoding	uc002ods.1	AX746638	UCSC_knowngene	2671	chr19	-	36803968	36806639		CAATGACTATTTAATAACTATTAAATGTTTCATTTCAGCTACACCTCTATGGTATTTTTT	intergenic							62.6799	19.5057	6.2622	3.74609	69.0008	64.0773	54.9614	22.161	21.1857	15.1705	6.50794	5.95718	6.32149	3.87865	3.99118	3.36845
ASHGA5P034898	0.00436374	0.0229931	2.79874	up	noncoding	ENST00000419083	MYCNOS	GENCODE	770	chr2	-	16080019	16081845		TTGAAAGAAGAGGGGCGCCCCCCTTGTTTGAAAATAAATAAATAAATAAGTGCGAGCTAC	intronic antisense	NM_005378	MYCN	N-myc proto-oncogene protein	+	16080682	16087129	31.8139	21.7829	5.38265	3.89787	33.6413	32.8989	28.9016	20.4409	16.8417	28.066	5.55713	5.09903	5.4918	3.74825	3.62968	4.31569
ASHGA5P029948	0.000955563	0.00950447	3.78418	up	noncoding	ENST00000526635	CTD-2339L15.1	GENCODE	419	chr15	-	40979920	40987296	ENST00000533146, NR_040058	AGACGGGAGCTCGAGAGCTTGATCCTGCGCGAGTTTACAGACTGCCCTCTTCCCTTTTTG	natural antisense	ENST00000527860	RAD51	RAD51 homolog (S. cerevisiae) [Source:HGNC Symbol;Acc:9817]	+	40986971	41011084	964.815	305.134	9.89559	7.97561	1073.53	918.27	902.645	331.443	281.6	302.358	10.1732	9.46565	10.0479	8.0293	7.9796	7.91793
ASHGA5P000454	0.00223228	0.01538	2.63827	up	noncoding	chr5:3790400-3802175+	chr5:3790400-3802175	LincRNAs identified by Khalil et al	11775	chr5	+	3737400	3749175		AAGATACTTCTAAGGTGTGAGGCCACAGCTCTGAGGCTCCTGGGTGTCATCACCTTCTTG	intergenic							150.512	83.6409	7.40245	6.00286	153.386	149.2	148.95	83.724	74.1543	93.0443	7.55502	7.02644	7.6259	5.9313	5.93883	6.13845
ASHGA5P016564	2.73113e-07	0.000460862	5.72701	up	noncoding	ENST00000431722	RP5-1185I7.1	GENCODE	564	chr7	+	77619700	77624259		TTTGAAAACTCCGTTCCTCCCCTTCACCTCCACCTGATTATTCATGTCGTGAAGAAACTG	intergenic							16199.6	3304.72	14.0029	11.4851	16515.5	18547.2	13536.1	3545.39	3106.91	3261.85	14.0561	13.9967	13.9558	11.5295	11.4685	11.4572
ASHGA5P017271	0.00289754	0.0178047	2.22336	up	noncoding	NR_004431	GHRLOS	RefSeq	1725	chr3	+	10327437	10335133	NR_024144	AAAGCTTTGGGAGAGTTGGGGCCTTCCATTCCCTCCAGTAAATACTTGTTTTTCTTCCAC	natural antisense	NM_001134941	GHRL	appetite-regulating hormone isoform 2 preproprotein	-	10327433	10332419	289.569	171.468	8.24415	7.09141	279.489	334.356	254.863	182.818	185.591	145.995	8.33599	8.07887	8.31759	7.11166	7.35258	6.80998
ASHGA5P017271	0.00289754	0.0178047	2.22336	up	noncoding	NR_004431	GHRLOS	RefSeq	1725	chr3	+	10327437	10335133	NR_024144	AAAGCTTTGGGAGAGTTGGGGCCTTCCATTCCCTCCAGTAAATACTTGTTTTTCTTCCAC	natural antisense	NM_001134944	GHRL	appetite-regulating hormone isoform 3 preproprotein	-	10327433	10334631	289.569	171.468	8.24415	7.09141	279.489	334.356	254.863	182.818	185.591	145.995	8.33599	8.07887	8.31759	7.11166	7.35258	6.80998
ASHGA5P017271	0.00289754	0.0178047	2.22336	up	noncoding	NR_004431	GHRLOS	RefSeq	1725	chr3	+	10327437	10335133	NR_024144	AAAGCTTTGGGAGAGTTGGGGCCTTCCATTCCCTCCAGTAAATACTTGTTTTTCTTCCAC	natural antisense	NM_001134945	GHRL	appetite-regulating hormone isoform 4 preproprotein	-	10327433	10334631	289.569	171.468	8.24415	7.09141	279.489	334.356	254.863	182.818	185.591	145.995	8.33599	8.07887	8.31759	7.11166	7.35258	6.80998
ASHGA5P017271	0.00289754	0.0178047	2.22336	up	noncoding	NR_004431	GHRLOS	RefSeq	1725	chr3	+	10327437	10335133	NR_024144	AAAGCTTTGGGAGAGTTGGGGCCTTCCATTCCCTCCAGTAAATACTTGTTTTTCTTCCAC	natural antisense	NM_001134946	GHRL	appetite-regulating hormone isoform 5 preproprotein	-	10327433	10334631	289.569	171.468	8.24415	7.09141	279.489	334.356	254.863	182.818	185.591	145.995	8.33599	8.07887	8.31759	7.11166	7.35258	6.80998
ASHGA5P017271	0.00289754	0.0178047	2.22336	up	noncoding	NR_004431	GHRLOS	RefSeq	1725	chr3	+	10327437	10335133	NR_024144	AAAGCTTTGGGAGAGTTGGGGCCTTCCATTCCCTCCAGTAAATACTTGTTTTTCTTCCAC	natural antisense	NM_016362	GHRL	appetite-regulating hormone isoform 1 preproprotein	-	10327433	10332419	289.569	171.468	8.24415	7.09141	279.489	334.356	254.863	182.818	185.591	145.995	8.33599	8.07887	8.31759	7.11166	7.35258	6.80998
ASHGA5P015319	0.00255101	0.0166411	3.08831	up	noncoding	ENST00000419237	MIAT	GENCODE	574	chr22	+	27053552	27062002		CGGACCCGAGAGAGCAGCAAGTTCCTGGGACAGAGGAGACAGAAGGGAATTTCCAGGTTC	intergenic							14.4764	8.19008	4.32869	2.70188	16.0793	15.903	11.4469	5.39198	6.55246	12.6258	4.58582	4.15108	4.24918	2.43607	2.5688	3.10076
ASHGA5P035667	0.00239141	0.0160781	5.02425	up	noncoding	ENST00000400768	AC114730.8	GENCODE	472	chr2	-	242674129	242674913		CTCAGGGCCCGGAGGGGAAGGGCAGGGAGCCGCTGGCTGCGCGCCTGGAAGTGGCCAAGG	natural antisense	NM_152783	D2HGDH	D-2-hydroxyglutarate dehydrogenase, mitochondrial precursor	+	242674029	242708231	25.5214	8.00932	4.97217	2.64326	14.7899	40.8165	20.9579	13.0122	6.01575	5	4.47211	5.38055	5.06383	3.05339	2.5336	2.34278
ASHGA5P046033	0.00188031	0.0138796	3.76315	up	noncoding	ENST00000446184	RP11-473E2.3	GENCODE	280	chr9	+	137444583	137445743		AAACATGTGAGGACAGCGATGGTTTTGCAGTTTCTGGCGCCGCCCGCAACACAACTCCAG	intergenic							29.6188	15.351	5.28824	3.3763	32.7901	27.0856	28.9808	18.721	14.5211	12.811	5.52328	4.84645	5.49498	3.60615	3.40297	3.11978
ASHGA5P032962	0.0011452	0.0103926	6.33082	up	noncoding	ENST00000578881	RP11-1109M24.5	GENCODE	1514	chr17	+	21793030	21814029		AATCCCTAAGGATCCAAAAGGATCTGCAGGATGCCTCAGGCCTGCCTAGTCATCGTAGGG	intergenic							325.542	70.9215	8.41004	5.74764	360.971	285.405	330.25	69.3618	82.0392	61.3635	8.6816	7.87728	8.67123	5.63761	6.09581	5.50951
ASHGA5P023082	0.00848064	0.0348748	2.491	up	noncoding	ENST00000569249	RP11-830F9.5	GENCODE	578	chr16	+	88947862	88950334		GAGTAAGGGGGCTCCAGGACTGAAGCCGCAGAGGCCACTCCCACAGGTCACCAGAAACTA	natural antisense	NM_005187	CBFA2T3	protein CBFA2T3 isoform 1	-	88941262	89043504	30.5824	23.4592	5.31873	4.00201	26.191	37.1392	28.417	19.7607	18.5775	32.0393	5.23383	5.25547	5.4669	3.69291	3.78912	4.52399
ASHGA5P023082	0.00848064	0.0348748	2.491	up	noncoding	ENST00000569249	RP11-830F9.5	GENCODE	578	chr16	+	88947862	88950334		GAGTAAGGGGGCTCCAGGACTGAAGCCGCAGAGGCCACTCCCACAGGTCACCAGAAACTA	natural antisense	NM_175931	CBFA2T3	protein CBFA2T3 isoform 2	-	88941262	89007608	30.5824	23.4592	5.31873	4.00201	26.191	37.1392	28.417	19.7607	18.5775	32.0393	5.23383	5.25547	5.4669	3.69291	3.78912	4.52399
ASHGA5P023470	0.000296939	0.00528044	3.70356	up	noncoding	uc010cqf.3	USP32P2	UCSC_knowngene	3540	chr17	-	18414575	18432061		CACAGGCAAGGTGAACAAATAGAAGCTGAGGGTGAAGGACCTACAGCTGTCACCTTCATC	intron sense-overlapping	ENST00000392176	FAM106A	family with sequence similarity 106, member A [Source:HGNC Symbol;Acc:25682]	-	18427879	18430160	14.0794	5.26088	4.27215	2.38324	10.3685	17.6567	14.2129	5.78264	5	5	3.9968	4.28429	4.53538	2.46048	2.34646	2.34278
ASHGA5P019415	0.00144661	0.0118855	4.49904	up	noncoding	ENST00000483163	AC008888.7	GENCODE	277	chr19	+	49141327	49183482		TCCTCGAAGGGGAGTCTCAGCGACCATGGGGGACACCATCCACTCCGTCAAGGGATTCTG	intronic antisense	NM_145807	NTN5	netrin-5 precursor	-	49164663	49176264	57.3995	20.3467	5.99909	3.82948	33.8764	96.9186	41.4034	20.3953	21.3158	19.3291	5.56724	6.47753	5.95251	3.74403	4.00232	3.74208
ASHGA5P019415	0.00144661	0.0118855	4.49904	up	noncoding	ENST00000483163	AC008888.7	GENCODE	277	chr19	+	49141327	49183482		TCCTCGAAGGGGAGTCTCAGCGACCATGGGGGACACCATCCACTCCGTCAAGGGATTCTG	natural antisense	NM_001217	CA11	carbonic anhydrase-related protein 11 precursor	-	49141271	49149451	57.3995	20.3467	5.99909	3.82948	33.8764	96.9186	41.4034	20.3953	21.3158	19.3291	5.56724	6.47753	5.95251	3.74403	4.00232	3.74208
ASHGA5P022312	0.000992485	0.00971652	2.88454	up	noncoding	NR_029434	FLJ31306	RefSeq	2498	chr14	-	58732082	58764855		TTACAACCCCCATACTGTACCAGGCAAGGTACCAGCATCAAGATGATTTATGGTAATAAG	intronic antisense	NM_002788	PSMA3	proteasome subunit alpha type-3 isoform 1	+	58711522	58738727	606.57	258.237	9.24104	7.7127	605.69	669.726	544.294	235.89	279.873	258.949	9.368	9.01885	9.33626	7.49879	7.96983	7.66946
ASHGA5P022312	0.000992485	0.00971652	2.88454	up	noncoding	NR_029434	FLJ31306	RefSeq	2498	chr14	-	58732082	58764855		TTACAACCCCCATACTGTACCAGGCAAGGTACCAGCATCAAGATGATTTATGGTAATAAG	intronic antisense	NM_152132	PSMA3	proteasome subunit alpha type-3 isoform 2	+	58711522	58738727	606.57	258.237	9.24104	7.7127	605.69	669.726	544.294	235.89	279.873	258.949	9.368	9.01885	9.33626	7.49879	7.96983	7.66946
ASHGA5P013052	0.00141849	0.0117738	2.06834	up	noncoding	uc002zkv.3	AK056135	UCSC_knowngene	575	chr22	-	16187164	16193004	ENST00000383038, ENST00000413768, ENST00000547779, ENST00000548107, ENST00000551881, ENST00000553153, uc001vvk.1, uc001vvl.4, uc001vvr.1, uc001vvs.1, uc001vvv.1, uc002zks.4	AGGTCTCCGCGGTTCATCTGTGTTGCTCTAAATGACACTGCTTCATTATTTTGATGGCTG	intergenic							672.313	383.338	9.35659	8.30812	564.016	881.105	571.817	446.735	367.987	335.292	9.26436	9.40749	9.39793	8.48218	8.377	8.06517
ASHGA5P048981	0.00253609	0.0165823	2.17384	up	noncoding	ENST00000568106	LA16c-358B7.3	GENCODE	3107	chr16	-	1369255	1372828	ENST00000567829	CATTTAGAAGTTCCTGTATTCCTAATAGGATCTGTGCCAGAGACAAAAACACAAGACGGG	natural antisense	NM_003345	UBE2I	SUMO-conjugating enzyme UBC9	+	1359627	1377019	108.086	74.9682	6.94995	5.82971	97.9141	136.138	90.2065	85.1627	78.6727	61.0691	6.96594	6.90732	6.97659	5.95849	6.02844	5.50219
ASHGA5P048981	0.00253609	0.0165823	2.17384	up	noncoding	ENST00000568106	LA16c-358B7.3	GENCODE	3107	chr16	-	1369255	1372828	ENST00000567829	CATTTAGAAGTTCCTGTATTCCTAATAGGATCTGTGCCAGAGACAAAAACACAAGACGGG	natural antisense	NM_194259	UBE2I	SUMO-conjugating enzyme UBC9	+	1359627	1377019	108.086	74.9682	6.94995	5.82971	97.9141	136.138	90.2065	85.1627	78.6727	61.0691	6.96594	6.90732	6.97659	5.95849	6.02844	5.50219
ASHGA5P048981	0.00253609	0.0165823	2.17384	up	noncoding	ENST00000568106	LA16c-358B7.3	GENCODE	3107	chr16	-	1369255	1372828	ENST00000567829	CATTTAGAAGTTCCTGTATTCCTAATAGGATCTGTGCCAGAGACAAAAACACAAGACGGG	natural antisense	NM_194260	UBE2I	SUMO-conjugating enzyme UBC9	+	1359153	1377019	108.086	74.9682	6.94995	5.82971	97.9141	136.138	90.2065	85.1627	78.6727	61.0691	6.96594	6.90732	6.97659	5.95849	6.02844	5.50219
ASHGA5P048981	0.00253609	0.0165823	2.17384	up	noncoding	ENST00000568106	LA16c-358B7.3	GENCODE	3107	chr16	-	1369255	1372828	ENST00000567829	CATTTAGAAGTTCCTGTATTCCTAATAGGATCTGTGCCAGAGACAAAAACACAAGACGGG	natural antisense	NM_194261	UBE2I	SUMO-conjugating enzyme UBC9	+	1359153	1377019	108.086	74.9682	6.94995	5.82971	97.9141	136.138	90.2065	85.1627	78.6727	61.0691	6.96594	6.90732	6.97659	5.95849	6.02844	5.50219
ASHGA5P028080	5.50219e-05	0.0026301	28.2352	up	noncoding	ENST00000557452	RP11-74M13.4	GENCODE	3942	chr12	+	57216768	57268052		GTGTAAAATGTGGTAGTGATACCTATATTTCTGCATCATGATATACTTGTCTAGGGATGC	intergenic							7131.06	312.054	12.7953	7.97592	7171.17	7917	6305	349.59	359.663	226.909	12.8446	12.7013	12.8401	8.11329	8.34584	7.46864
ASHGA5P058586	0.00160358	0.0126646	8.47769	up	noncoding	uc010mtf.1	AK310471	UCSC_knowngene	1081	chr9	-	104356035	104357303		AAATTAAAAGGCTGGGCAGGAGGAGCAGAAGTTGAGGTTTGCGTTCAGCATTTACGACAT	exon sense-overlapping	NM_147180	PPP3R2	calcineurin subunit B type 2	-	104353896	104357283	109.228	18.6425	6.73772	3.65405	69.8456	204.944	52.8934	24.8676	14.3862	16.6735	6.52507	7.41955	6.26854	4.0611	3.38944	3.51161
ASHGA5P058586	0.00160358	0.0126646	8.47769	up	noncoding	uc010mtf.1	AK310471	UCSC_knowngene	1081	chr9	-	104356035	104357303		AAATTAAAAGGCTGGGCAGGAGGAGCAGAAGTTGAGGTTTGCGTTCAGCATTTACGACAT	intron sense-overlapping	NM_133445	GRIN3A	glutamate [NMDA] receptor subunit 3A precursor	-	104331633	104500862	109.228	18.6425	6.73772	3.65405	69.8456	204.944	52.8934	24.8676	14.3862	16.6735	6.52507	7.41955	6.26854	4.0611	3.38944	3.51161
ASHGA5P015057	1.78621e-05	0.00170548	4.94626	up	noncoding	ENST00000416100	AC102953.6	GENCODE	242	chr7	-	1548290	1549063		TGCAAACAAGATGTCCTCACGAGGCACAGAGACACAGAGAGAAGACGGCCACATGGAGTC	intergenic							18.5927	5	4.64966	2.34333	19.4706	22.1772	14.1303	5	5	5	4.83965	4.57944	4.52991	2.34074	2.34646	2.34278
ASHGA5P031105	0.000890773	0.00917491	2.06144	up	noncoding	TCONS_00006092	XLOC_002701	LincRNAs identified by Cabili et al	466	chr3	+	71835019	71835668		TTTATGCCCACATCTGTTCCCGACCCTCTCCTCTGATTTTCCTCACATGTATTTCCTCCC	intergenic							1397.52	790.884	10.4403	9.39667	1382.57	1601.57	1208.41	921.738	671.877	779.036	10.5477	10.2803	10.4929	9.56117	9.27901	9.34981
ASHGA5P058424	0.00286995	0.0176939	2.1839	up	noncoding	uc003jxc.4	GUSBP3	UCSC_knowngene	1316	chr5	-	68921200	69006272	uc010iyh.1	TGGGCCAGTGGCTGTCATTACATATGAGAACTCAAGCTCCATGAGGAGATGTTTCATTGT	intergenic							18.3116	16.6873	4.63198	3.50508	20.2318	20.8491	13.8538	17.3682	13.7064	18.9875	4.88962	4.49976	4.50657	3.48327	3.31678	3.71518
ASHGA5P057372	0.00119893	0.0107278	3.57587	up	noncoding	TCONS_00016406	XLOC_007777	LincRNAs identified by Cabili et al	698	chr9	-	94246564	94249578		TTTCTCTCTCTCTGATCCAAAATGACTGCTGCATCAGTAAACACTTGGGAGTGAAGCAGG	intergenic							1603.45	532.919	10.6359	8.79758	1366.03	1823.86	1620.46	646.6	523.643	428.515	10.5266	10.4737	10.9074	9.0372	8.90429	8.45125
ASHGA5P022991	0.000868398	0.00907762	4.82389	up	noncoding	ENST00000567227	CTD-2009A10.1	GENCODE	532	chr16	+	73577839	73592421		ACCTAGGAAGCCCACTGAATAACAGGTTTTTTCAAGAGAGAAAGAAAGAAAACAGATCCC	intergenic							20.3935	6.65898	4.78486	2.51466	23.6634	20.067	17.4501	5	9.97693	5	5.09548	4.4515	4.80761	2.34074	2.86047	2.34278
ASHGA5P048659	0.000515757	0.00696476	6.98186	up	noncoding	ENST00000510176	RP11-23P13.4	GENCODE	585	chr15	-	42117296	42120134		CATCCCAGGGTTAACAAACAATTGTGTTTATTGACAAGTTCATACATCAGTACAAACGGG	natural antisense	NM_001128608	MAPKBP1	mitogen-activated protein kinase-binding protein 1 isoform b	+	42066631	42120053	147.614	32.8817	7.37154	4.56793	164.734	145.409	132.698	28.7033	38.8797	31.062	7.64593	6.99384	7.47485	4.2901	4.93788	4.4758
ASHGA5P048659	0.000515757	0.00696476	6.98186	up	noncoding	ENST00000510176	RP11-23P13.4	GENCODE	585	chr15	-	42117296	42120134		CATCCCAGGGTTAACAAACAATTGTGTTTATTGACAAGTTCATACATCAGTACAAACGGG	natural antisense	NM_001265611	MAPKBP1	mitogen-activated protein kinase-binding protein 1 isoform c	+	42066631	42120053	147.614	32.8817	7.37154	4.56793	164.734	145.409	132.698	28.7033	38.8797	31.062	7.64593	6.99384	7.47485	4.2901	4.93788	4.4758
ASHGA5P048659	0.000515757	0.00696476	6.98186	up	noncoding	ENST00000510176	RP11-23P13.4	GENCODE	585	chr15	-	42117296	42120134		CATCCCAGGGTTAACAAACAATTGTGTTTATTGACAAGTTCATACATCAGTACAAACGGG	natural antisense	NM_014994	MAPKBP1	mitogen-activated protein kinase-binding protein 1 isoform a	+	42066631	42120053	147.614	32.8817	7.37154	4.56793	164.734	145.409	132.698	28.7033	38.8797	31.062	7.64593	6.99384	7.47485	4.2901	4.93788	4.4758
ASHGA5P051232	8.10265e-07	0.000756825	3.78914	up	noncoding	ENST00000491562	PI4KAP2	GENCODE	209	chr22	-	21846264	21868512	ENST00000476537	GCTGGCTGCTGCTCACATGGTGTCTGGGCCCTTGGCACTCTGGTGAGGCGCAGGGGAGGG	intergenic							5912.45	1823.24	12.5182	10.5963	5591.81	6925.05	5220.5	1863.6	1665.24	1940.87	12.5027	12.4882	12.5637	10.5692	10.566	10.6537
ASHGA5P047633	0.0104863	0.0398017	2.44921	up	noncoding	ENST00000443919	RP11-316M21.7	GENCODE	578	chr10	+	101949792	101950504		TATATCCCTGAGTAACGGCAGATAAGGATTTAAGGTTGAGGATATTCCCCAAATGCTCTT	intronic antisense	NM_001278	CHUK	inhibitor of nuclear factor kappa-B kinase subunit alpha	-	101948123	101989344	16.8883	14.0991	4.51096	3.21864	14.845	22.5584	13.2615	19.474	8.52633	14.297	4.4764	4.60441	4.45206	3.6709	2.70471	3.2803
ASHGA5P022939	0.0105266	0.0399134	29.9097	up	noncoding	ENST00000565893	PWRN1	GENCODE	818	chr15	+	24738283	24758291		ATCTCCCAAGGTTTCAAATAATTCATCAGTGAATTCTTCTCAACCTGGTCAATCATGTGA	intergenic							2626.16	68.3571	10.5953	5.69279	2375.32	5216.86	286.302	74.6783	61.0061	69.387	11.2744	12.0319	8.47965	5.74768	5.63122	5.69946
ASHGA5P043263	0.000528541	0.00703064	2.52147	up	noncoding	NR_024586	LOC100216545	RefSeq	3615	chr7	-	104650988	104654588		TTTAAGAATTTTCTTCCCCCATCCCCTCACAAAGATTATTTGAGTAAATTACACCCCAAC	bidirectional	NM_018682	MLL5	histone-lysine N-methyltransferase MLL5	+	104654636	104754532	5816.17	2677.61	12.4859	11.1516	5966.9	6310.83	5170.79	2788.08	2849.64	2395.12	12.5803	12.3315	12.5458	11.1556	11.3328	10.9664
ASHGA5P043263	0.000528541	0.00703064	2.52147	up	noncoding	NR_024586	LOC100216545	RefSeq	3615	chr7	-	104650988	104654588		TTTAAGAATTTTCTTCCCCCATCCCCTCACAAAGATTATTTGAGTAAATTACACCCCAAC	bidirectional	NM_182931	MLL5	histone-lysine N-methyltransferase MLL5	+	104654636	104754532	5816.17	2677.61	12.4859	11.1516	5966.9	6310.83	5170.79	2788.08	2849.64	2395.12	12.5803	12.3315	12.5458	11.1556	11.3328	10.9664
ASHGA5P039063	0.0121358	0.043664	2.54385	up	noncoding	ENST00000490153	SLC9A9-AS2	GENCODE	327	chr3	+	143100179	143101003		TCAGATTTTCATCCAGGTCCACGCCAACTCTGTTAAACAAAACCAAAAACTGGTCAATCC	natural antisense	NM_173653	SLC9A9	sodium/hydrogen exchanger 9	-	142984063	143567373	37.8235	24.7059	5.4718	4.12478	21.6872	62.3114	29.472	25.7702	27.3084	21.039	4.97755	5.91787	5.51998	4.11591	4.38323	3.87521
ASHGA5P017250	0.000878187	0.00909886	2.38368	up	noncoding	ENST00000439360	RP4-756H11.3	GENCODE	508	chr7	+	66119537	66134285		TGTGACGACGACTGACAACTAACCCTCTCTGGTTTTACTTTCTATCACCTCTTAGGCAGA	intergenic							216.688	124.774	7.86187	6.60868	207.442	235.059	207.564	130.528	122.762	121.031	7.92833	7.61061	8.04666	6.59581	6.70684	6.52339
ASHGA5P027168	0.00017589	0.00416039	2.61089	up	noncoding	NR_038927	DDX11-AS1	RefSeq	2031	chr12	-	31173696	31226781		CTGCTGTGTACACAGGAGAAATAATCACTCCACACCCGACTGAACATTTTCTAACCTTAT	natural antisense	NM_001257144	DDX11	probable ATP-dependent RNA helicase DDX11 isoform 3	+	31226778	31257725	136.961	74.3687	7.2131	5.82856	109.063	198.037	103.781	80.5495	72.7734	69.7831	7.11589	7.37649	7.14691	5.86927	5.90921	5.70719
ASHGA5P027168	0.00017589	0.00416039	2.61089	up	noncoding	NR_038927	DDX11-AS1	RefSeq	2031	chr12	-	31173696	31226781		CTGCTGTGTACACAGGAGAAATAATCACTCCACACCCGACTGAACATTTTCTAACCTTAT	natural antisense	NM_001257145	DDX11	probable ATP-dependent RNA helicase DDX11 isoform 4	+	31226778	31257725	136.961	74.3687	7.2131	5.82856	109.063	198.037	103.781	80.5495	72.7734	69.7831	7.11589	7.37649	7.14691	5.86927	5.90921	5.70719
ASHGA5P027168	0.00017589	0.00416039	2.61089	up	noncoding	NR_038927	DDX11-AS1	RefSeq	2031	chr12	-	31173696	31226781		CTGCTGTGTACACAGGAGAAATAATCACTCCACACCCGACTGAACATTTTCTAACCTTAT	natural antisense	NM_004399	DDX11	probable ATP-dependent RNA helicase DDX11 isoform 2	+	31226778	31257725	136.961	74.3687	7.2131	5.82856	109.063	198.037	103.781	80.5495	72.7734	69.7831	7.11589	7.37649	7.14691	5.86927	5.90921	5.70719
ASHGA5P027168	0.00017589	0.00416039	2.61089	up	noncoding	NR_038927	DDX11-AS1	RefSeq	2031	chr12	-	31173696	31226781		CTGCTGTGTACACAGGAGAAATAATCACTCCACACCCGACTGAACATTTTCTAACCTTAT	natural antisense	NM_030653	DDX11	probable ATP-dependent RNA helicase DDX11 isoform 1	+	31226778	31257725	136.961	74.3687	7.2131	5.82856	109.063	198.037	103.781	80.5495	72.7734	69.7831	7.11589	7.37649	7.14691	5.86927	5.90921	5.70719
ASHGA5P027168	0.00017589	0.00416039	2.61089	up	noncoding	NR_038927	DDX11-AS1	RefSeq	2031	chr12	-	31173696	31226781		CTGCTGTGTACACAGGAGAAATAATCACTCCACACCCGACTGAACATTTTCTAACCTTAT	natural antisense	NM_152438	DDX11	probable ATP-dependent RNA helicase DDX11 isoform 3	+	31226778	31257725	136.961	74.3687	7.2131	5.82856	109.063	198.037	103.781	80.5495	72.7734	69.7831	7.11589	7.37649	7.14691	5.86927	5.90921	5.70719
ASHGA5P052137	9.64519e-05	0.00324692	2.40648	up	noncoding	ENST00000511728	RP11-471J12.1	GENCODE	583	chr4	+	174451612	174458616	ENST00000502896, ENST00000509866, uc003itj.3	TACTGCTTCTCCTCTCTCCCCCAACTCCCTCCCACAAATGAAGTTTTCTCTTCTGAATTC	bidirectional	NM_021973	HAND2	heart- and neural crest derivatives-expressed protein 2	-	174447651	174451378	103262	62409.7	16.9962	15.7293	107414	115507	86865.3	65472.7	61039.4	60716.8	17.076	17.0572	16.8555	15.7938	15.6583	15.7359
ASHGA5P015587	4.32417e-05	0.00237204	3.00024	up	noncoding	ENST00000421686	RP11-146D12.2	GENCODE	1791	chr9	+	42410362	42474269	ENST00000417703	ACTCTTAGACTGTGATGGAGCTGGACTGTGTAGAACAAATAACTAGAGAAACAAAGAGAA	exon sense-overlapping	NM_001012419	ANKRD20A3	ankyrin repeat domain-containing protein 20A3	+	42368302	42411863	56.2706	31.8185	6.11275	4.52767	51.6231	66.0146	51.174	33.927	31.154	30.3745	6.11723	5.99377	6.22724	4.55397	4.59362	4.43542
ASHGA5P015587	4.32417e-05	0.00237204	3.00024	up	noncoding	ENST00000421686	RP11-146D12.2	GENCODE	1791	chr9	+	42410362	42474269	ENST00000417703	ACTCTTAGACTGTGATGGAGCTGGACTGTGTAGAACAAATAACTAGAGAAACAAAGAGAA	exon sense-overlapping	NM_001012421	ANKRD20A2	ankyrin repeat domain-containing protein 20A2	+	42368302	42411410	56.2706	31.8185	6.11275	4.52767	51.6231	66.0146	51.174	33.927	31.154	30.3745	6.11723	5.99377	6.22724	4.55397	4.59362	4.43542
ASHGA5P016903	0.000234836	0.00474686	7.83781	up	noncoding	ENST00000435524	RP5-1132H15.1	GENCODE	377	chr7	-	65584589	65593711		ATTCAGAAAGATGTGGAACCTGCAGATATGGAGGGCCAACTGCATTTATTTTTTAAAATC	intronic antisense	NM_001040647	CRCP	DNA-directed RNA polymerase III subunit RPC9 isoform b	+	65579804	65619553	58.5927	13.6153	6.16146	3.19101	57.3355	69.0093	49.4333	16.9131	14.4499	9.48288	6.25332	6.04889	6.18217	3.4446	3.39608	2.73237
ASHGA5P016903	0.000234836	0.00474686	7.83781	up	noncoding	ENST00000435524	RP5-1132H15.1	GENCODE	377	chr7	-	65584589	65593711		ATTCAGAAAGATGTGGAACCTGCAGATATGGAGGGCCAACTGCATTTATTTTTTAAAATC	intronic antisense	NM_001040648	CRCP	DNA-directed RNA polymerase III subunit RPC9 isoform c	+	65579804	65619553	58.5927	13.6153	6.16146	3.19101	57.3355	69.0093	49.4333	16.9131	14.4499	9.48288	6.25332	6.04889	6.18217	3.4446	3.39608	2.73237
ASHGA5P016903	0.000234836	0.00474686	7.83781	up	noncoding	ENST00000435524	RP5-1132H15.1	GENCODE	377	chr7	-	65584589	65593711		ATTCAGAAAGATGTGGAACCTGCAGATATGGAGGGCCAACTGCATTTATTTTTTAAAATC	intronic antisense	NM_001142414	CRCP	DNA-directed RNA polymerase III subunit RPC9 isoform d	+	65579804	65619553	58.5927	13.6153	6.16146	3.19101	57.3355	69.0093	49.4333	16.9131	14.4499	9.48288	6.25332	6.04889	6.18217	3.4446	3.39608	2.73237
ASHGA5P016903	0.000234836	0.00474686	7.83781	up	noncoding	ENST00000435524	RP5-1132H15.1	GENCODE	377	chr7	-	65584589	65593711		ATTCAGAAAGATGTGGAACCTGCAGATATGGAGGGCCAACTGCATTTATTTTTTAAAATC	intronic antisense	NM_014478	CRCP	DNA-directed RNA polymerase III subunit RPC9 isoform a	+	65579804	65619553	58.5927	13.6153	6.16146	3.19101	57.3355	69.0093	49.4333	16.9131	14.4499	9.48288	6.25332	6.04889	6.18217	3.4446	3.39608	2.73237
ASHGA5P030658	0.00718348	0.0313129	2.10243	up	noncoding	ENST00000564683	CTD-2026K11.2	GENCODE	572	chr15	+	75928479	75931580		TTATAAAAACTTGAGGCCAAACTCTCCATCATCTGTACACAGCTTAACCACGGCCAGGAG	natural antisense	NM_018285	IMP3	U3 small nucleolar ribonucleoprotein protein IMP3	-	75931425	75932664	1092.47	605.416	10.0834	9.01131	1170.36	1075.44	1031.6	598.194	622.966	595.087	10.3044	9.6933	10.2524	8.91601	9.17338	8.94454
ASHGA5P044359	9.97506e-06	0.00132897	12.3855	up	noncoding	TCONS_00002272	XLOC_000647	LincRNAs identified by Cabili et al	1073	chr1	+	247496211	247556671		ACTGTTCACCTTTTGAGGCACAAAACGGGCTGTTTATGCTGCTGCTGCATTTAGCTCAAA	intergenic							3700.36	354.565	11.8222	8.19163	3550.05	3910.15	3640.88	393.063	314.85	355.782	11.8383	11.6014	12.027	8.27904	8.14766	8.1482
ASHGA5P034977	3.65522e-06	0.000982542	4.94006	up	noncoding	TCONS_00004741	XLOC_001414	LincRNAs identified by Cabili et al	539	chr2	+	31055131	31058199		GGAACTTCTGTTCTTACCCCTGTCCTTCCCTTCACCTTTTATAGTTACTAAATGCAATGT	intergenic							6062.17	1426.63	12.5441	10.2395	5481.59	7682.8	5022.11	1548.31	1304.9	1426.69	12.4799	12.6587	12.4936	10.298	10.2111	10.2095
ASHGA5P058621	0.0021375	0.0150075	2.97927	up	noncoding	uc011crh.2	SMA4	UCSC_knowngene	1773	chr5	+	69170990	70092800		CTGTAAAACCAGCCTTAGACTATTTTTCAAACAGATGGTGATTGCTCACACCAAAGCCTT	intron sense-overlapping	NM_000344	SMN1	survival motor neuron protein isoform d	+	69345349	69373418	34.0802	20.5609	5.41251	3.83756	22.0168	46.8621	33.3616	21.0364	17.9408	22.7055	4.99863	5.55873	5.68018	3.79515	3.73099	3.98654
ASHGA5P058621	0.0021375	0.0150075	2.97927	up	noncoding	uc011crh.2	SMA4	UCSC_knowngene	1773	chr5	+	69170990	70092800		CTGTAAAACCAGCCTTAGACTATTTTTCAAACAGATGGTGATTGCTCACACCAAAGCCTT	intron sense-overlapping	NM_001178087	SERF1B	small EDRK-rich factor 1 isoform 1	+	69321077	69328523	34.0802	20.5609	5.41251	3.83756	22.0168	46.8621	33.3616	21.0364	17.9408	22.7055	4.99863	5.55873	5.68018	3.79515	3.73099	3.98654
ASHGA5P058621	0.0021375	0.0150075	2.97927	up	noncoding	uc011crh.2	SMA4	UCSC_knowngene	1773	chr5	+	69170990	70092800		CTGTAAAACCAGCCTTAGACTATTTTTCAAACAGATGGTGATTGCTCACACCAAAGCCTT	intron sense-overlapping	NM_017411	SMN2	survival motor neuron protein isoform d	+	69345349	69373422	34.0802	20.5609	5.41251	3.83756	22.0168	46.8621	33.3616	21.0364	17.9408	22.7055	4.99863	5.55873	5.68018	3.79515	3.73099	3.98654
ASHGA5P058621	0.0021375	0.0150075	2.97927	up	noncoding	uc011crh.2	SMA4	UCSC_knowngene	1773	chr5	+	69170990	70092800		CTGTAAAACCAGCCTTAGACTATTTTTCAAACAGATGGTGATTGCTCACACCAAAGCCTT	intron sense-overlapping	NM_021967	SERF1A	small EDRK-rich factor 1 isoform 1	+	69321071	69338940	34.0802	20.5609	5.41251	3.83756	22.0168	46.8621	33.3616	21.0364	17.9408	22.7055	4.99863	5.55873	5.68018	3.79515	3.73099	3.98654
ASHGA5P058621	0.0021375	0.0150075	2.97927	up	noncoding	uc011crh.2	SMA4	UCSC_knowngene	1773	chr5	+	69170990	70092800		CTGTAAAACCAGCCTTAGACTATTTTTCAAACAGATGGTGATTGCTCACACCAAAGCCTT	intron sense-overlapping	NM_022874	SMN1	survival motor neuron protein isoform b	+	69345349	69373418	34.0802	20.5609	5.41251	3.83756	22.0168	46.8621	33.3616	21.0364	17.9408	22.7055	4.99863	5.55873	5.68018	3.79515	3.73099	3.98654
ASHGA5P058621	0.0021375	0.0150075	2.97927	up	noncoding	uc011crh.2	SMA4	UCSC_knowngene	1773	chr5	+	69170990	70092800		CTGTAAAACCAGCCTTAGACTATTTTTCAAACAGATGGTGATTGCTCACACCAAAGCCTT	intron sense-overlapping	NM_022875	SMN2	survival motor neuron protein isoform a	+	69345349	69373422	34.0802	20.5609	5.41251	3.83756	22.0168	46.8621	33.3616	21.0364	17.9408	22.7055	4.99863	5.55873	5.68018	3.79515	3.73099	3.98654
ASHGA5P058621	0.0021375	0.0150075	2.97927	up	noncoding	uc011crh.2	SMA4	UCSC_knowngene	1773	chr5	+	69170990	70092800		CTGTAAAACCAGCCTTAGACTATTTTTCAAACAGATGGTGATTGCTCACACCAAAGCCTT	intron sense-overlapping	NM_022876	SMN2	survival motor neuron protein isoform b	+	69345349	69373422	34.0802	20.5609	5.41251	3.83756	22.0168	46.8621	33.3616	21.0364	17.9408	22.7055	4.99863	5.55873	5.68018	3.79515	3.73099	3.98654
ASHGA5P058621	0.0021375	0.0150075	2.97927	up	noncoding	uc011crh.2	SMA4	UCSC_knowngene	1773	chr5	+	69170990	70092800		CTGTAAAACCAGCCTTAGACTATTTTTCAAACAGATGGTGATTGCTCACACCAAAGCCTT	intron sense-overlapping	NM_022877	SMN2	survival motor neuron protein isoform c	+	69345349	69373422	34.0802	20.5609	5.41251	3.83756	22.0168	46.8621	33.3616	21.0364	17.9408	22.7055	4.99863	5.55873	5.68018	3.79515	3.73099	3.98654
ASHGA5P058621	0.0021375	0.0150075	2.97927	up	noncoding	uc011crh.2	SMA4	UCSC_knowngene	1773	chr5	+	69170990	70092800		CTGTAAAACCAGCCTTAGACTATTTTTCAAACAGATGGTGATTGCTCACACCAAAGCCTT	intron sense-overlapping	NM_022968	SERF1A	small EDRK-rich factor 1 isoform 2	+	69321071	69328525	34.0802	20.5609	5.41251	3.83756	22.0168	46.8621	33.3616	21.0364	17.9408	22.7055	4.99863	5.55873	5.68018	3.79515	3.73099	3.98654
ASHGA5P058621	0.0021375	0.0150075	2.97927	up	noncoding	uc011crh.2	SMA4	UCSC_knowngene	1773	chr5	+	69170990	70092800		CTGTAAAACCAGCCTTAGACTATTTTTCAAACAGATGGTGATTGCTCACACCAAAGCCTT	intron sense-overlapping	NM_022978	SERF1B	small EDRK-rich factor 1 isoform 2	+	69321077	69338934	34.0802	20.5609	5.41251	3.83756	22.0168	46.8621	33.3616	21.0364	17.9408	22.7055	4.99863	5.55873	5.68018	3.79515	3.73099	3.98654
ASHGA5P027138	0.0299393	0.0785014	2.47681	up	noncoding	ENST00000535914	RP11-283G6.3	GENCODE	436	chr12	-	26278087	26279017		TGGTACCCGTTTGAGACCGGATTAAGGAGGGAGGCTTTGGAGGTGCCAGCGGTAGTAAAC	intronic antisense	ENST00000538142	SSPN	sarcospan [Source:HGNC Symbol;Acc:11322]	+	26274923	26383947	12.5401	9.3597	4.05398	2.7455	6.56423	14.396	16.6601	9.89201	7.16359	11.0235	3.40266	4.01771	4.74159	2.72363	2.60747	2.90541
ASHGA5P035988	0.00240654	0.0161096	2.67714	up	noncoding	ENST00000443770	ANKRD36BP2	GENCODE	503	chr2	+	89065459	89073085		CATCTTCTGATTACCAGATTGAGTTTCTGCATGTGTGTGTGTATCTCTGATTAAAAATGA	intergenic							3452.89	1488.91	11.7131	10.2924	2814.93	4168.78	3374.95	1491.5	1707.86	1267.38	11.4973	11.7105	11.9315	10.2405	10.6025	10.0342
ASHGA5P021263	0.000905754	0.00924245	2.55948	up	noncoding	ENST00000528982	AP006621.8	GENCODE	464	chr11	-	823655	824645		GCATCACCAGGTGCGCACCCTCATTGAGCCGGGCGGGCAGGTGCTCCAGGATGTGATCTT	natural antisense	NM_020376	PNPLA2	patatin-like phospholipase domain-containing protein 2	+	818900	825571	23.805	17.5541	4.94883	3.59298	18.8682	33.5712	18.9756	15.9828	16.972	19.7074	4.79902	5.12492	4.92256	3.36404	3.64215	3.77275
ASHGA5P031169	0.00105565	0.00994723	2.04092	up	noncoding	ENST00000562178	RP11-467J12.4	GENCODE	464	chr16	-	53069601	53086785		AGCTACTTCACTGCAGGCTGGTGCCCTGGTGAAGGTGAATCAGTCAGAGGAGTGCTGACT	intergenic							40.1661	34.5027	5.66535	4.63613	37.076	50.5345	32.8877	39.2752	27.5367	36.6962	5.68656	5.64747	5.66202	4.77525	4.39572	4.73742
ASHGA5P031574	0.00044833	0.00649762	4.25579	up	noncoding	ENST00000565802	RP11-626G11.1	GENCODE	704	chr16	+	19077312	19078016		TGAAAGCTCCCTTCTCCCAGTTCCAGCCCCCTGATGTTGCCAATATTAAACGTTGTATAT	intergenic							20253.9	5556.98	14.3083	12.2188	20432.4	26794.2	13535.2	5817.94	5711.48	5141.52	14.3696	14.6007	13.9544	12.2325	12.3079	12.1161
ASHGA5P050594	0.00192406	0.0141022	2.337	up	noncoding	ENST00000451400	AC013402.2	GENCODE	3778	chr2	+	105049724	105137290		CACACACACACAGCACAGATTTTTTTGATTATGTAGATTTCTTTTCCTACTGCAGTTTCA	intergenic							157.764	96.178	7.42499	6.20033	127.052	209.401	136.838	112.007	97.9707	78.5565	7.31219	7.44764	7.51515	6.35899	6.35786	5.88415
ASHGA5P048159	0.00239315	0.0160781	2.81682	up	noncoding	TCONS_00017457	XLOC_008058	LincRNAs identified by Cabili et al	548	chrX	+	119125486	119126833	TCONS_00017237	AGTGTAAATAAAGTTCCATTCCTTCTAACAATGGTATCCTTTAGAGAACACTTCTGTGTG	intergenic							57.73	33.9478	6.09422	4.60015	50.9686	82.1	40.1213	32.5602	26.4579	42.8253	6.09847	6.27077	5.91342	4.48687	4.33795	4.97565
ASHGA5P036062	0.000389776	0.00605786	2.82211	up	noncoding	TCONS_00016344	XLOC_007725	LincRNAs identified by Cabili et al	1872	chr9	-	72009221	72013753		GAACTAGGAAGGAGATAAATCACATGACTTCTGAGTTCCCTCCCATGCTAAATATATGTA	intergenic							20310.2	8468.93	14.3512	12.8544	21746.9	19738.3	19445.3	8765.3	7852.59	8788.89	14.4707	14.0924	14.4905	12.8478	12.7849	12.9306
ASHGA5P020457	0.0474907	0.108438	2.26772	up	noncoding	ENST00000513880	CTD-2089N3.2	GENCODE	225	chr5	-	50265050	50265801		AAATGGAGAAACCAGGGCAACGTGGCCCCGGGATTGGCTGCACCACGCAGCTGTTGTCCA	intergenic							13.9202	11.5891	4.21638	3.03513	18.0689	15.8336	7.85815	14.0726	15.2842	5.41041	4.74307	4.14457	3.76149	3.17157	3.48178	2.45205
ASHGA5P055588	2.83839e-05	0.00194038	6.57557	up	noncoding	ENST00000397112	GOLGA2B	GENCODE	2632	chr12	-	100550189	100567437	ENST00000548404	GCCTGACCATGCCTCCTTTCCCTTTCAGCTTTCTCATAGACCAATGGGCTTGGAGCATTA	intergenic							12150.1	2172.38	13.5635	10.8464	12345	13803.2	10302	2322.14	2317.04	1877.98	13.6185	13.5394	13.5325	10.8926	11.0345	10.612
ASHGA5P043809	0.0154399	0.0507841	2.23943	up	noncoding	ENST00000376482	AC073842.19	GENCODE	342	chr7	+	99728586	99738062		TTTGGGCTCACACCATTGATACTGCTGATCCTGATGACCAATGCCAATTTGTGTTCTGCA	intergenic							82.0716	58.506	6.60483	5.4417	88.2056	87.4737	70.5354	49.3758	74.2399	51.9024	6.81731	6.35065	6.64654	5.1228	5.94038	5.26192
ASHGA5P051838	0.00100047	0.00974621	3.71763	up	noncoding	ENST00000425425	SDHAP2	GENCODE	525	chr3	+	195384963	195391159		ATTGCACACCTTATATGGGAGGGTAAGGCTGCCCCCCGTCCACCTGAGACAGGACACATA	intron sense-overlapping	ENST00000381954	MUC20	mucin 20, cell surface associated [Source:HGNC Symbol;Acc:23282]	+	195343315	195460421	2474.69	755.484	11.2307	9.33632	2712.72	2293.11	2418.24	732.742	770.771	762.938	11.4421	10.8174	11.4326	9.21984	9.47781	9.31129
ASHGA5P047748	4.89698e-05	0.00246023	3.43333	up	noncoding	TCONS_00013620	XLOC_006283	LincRNAs identified by Cabili et al	256	chr7	+	144854105	144857237		AACTCTCAAGCTGTCCCTGCTGCTCTGGAGGCAAGATGTCACTGAGGTGACTGTTGCCCA	intergenic							2521.84	834.658	11.2649	9.48533	2641.05	2775.06	2149.4	872.748	798.495	832.731	11.4128	11.0941	11.2879	9.48401	9.52631	9.44566
ASHGA5P041031	0.00653904	0.029541	2.55166	up	noncoding	NR_038848	LOC643401	RefSeq	1120	chr5	+	27472398	27496508		AATAATATTTATGTCATACCTTATGAAGTTAAAATAAAATATAACGAATGAGGGGCTTAA	intergenic							10.6635	5.59251	3.80225	2.45081	7.95476	17.8309	6.20472	5	5.97668	5.80084	3.64949	4.298	3.45927	2.34074	2.52983	2.48187
ASHGA5P053413	0.021265	0.0624596	2.35527	up	noncoding	ENST00000519314	RP11-513O17.2	GENCODE	562	chr8	+	58055247	58113647		AGCGGGCGTTAGAAGTTGCTGGCAGTCAGAGGCAGGGGAGCTGTCACTCGCGGCGAGCCG	intergenic							22.7291	18.8856	4.89329	3.65739	17.2935	31.636	19.258	24.89	19.7419	12.0248	4.68712	5.04782	4.94492	4.06336	3.87966	3.02916
ASHGA5P040343	0.00436518	0.0229931	2.4987	up	noncoding	TCONS_00021786	XLOC_010384	LincRNAs identified by Cabili et al	2120	chr13	+	47402275	47407401		AAAGTGGCTGAAACATCAGCATCGGGTGGTGGCAATGCCTTGAGGGATATCTTATCATAT	natural antisense	NM_000621	HTR2A	5-hydroxytryptamine receptor 2A isoform 1	-	47405676	47471211	24.4315	19.1995	5.03795	3.71677	23.5623	25.2243	24.5079	16.7396	17.5322	23.3268	5.08941	4.75969	5.26474	3.42995	3.69394	4.02642
ASHGA5P040343	0.00436518	0.0229931	2.4987	up	noncoding	TCONS_00021786	XLOC_010384	LincRNAs identified by Cabili et al	2120	chr13	+	47402275	47407401		AAAGTGGCTGAAACATCAGCATCGGGTGGTGGCAATGCCTTGAGGGATATCTTATCATAT	natural antisense	NM_001165947	HTR2A	5-hydroxytryptamine receptor 2A isoform 2	-	47405676	47471211	24.4315	19.1995	5.03795	3.71677	23.5623	25.2243	24.5079	16.7396	17.5322	23.3268	5.08941	4.75969	5.26474	3.42995	3.69394	4.02642
ASHGA5P052419	0.00624558	0.0286783	2.33981	up	noncoding	ENST00000520928	CTB-131B5.4	GENCODE	648	chr5	-	139484886	139486067		CACAATACAATTGAATTTATATGCATTTCAAAATAGACTCCATTTGATTTACCGTGTAAA	intergenic							31.0653	24.4406	5.336	4.10961	37.0425	31.0174	25.1359	27.8669	24.85	20.605	5.68502	5.02426	5.29872	4.23899	4.24542	3.84441
ASHGA5P037064	0.00333469	0.0193572	2.73561	up	noncoding	TCONS_00025662	XLOC_012488	LincRNAs identified by Cabili et al	1046	chr17	-	42723424	42725050		AAGGCATATGAGTGGACCGTAAGGTATATGGCACGTTCACTGATAAAACATCCCCTACTC	intergenic							22.438	16.2405	4.88691	3.43505	19.2166	30.0378	18.0598	17.9041	11.1317	19.6856	4.82203	4.98382	4.85487	3.53033	3.00323	3.77157
ASHGA5P044802	0.000112244	0.00345962	18.3614	up	noncoding	ENST00000528139	RP11-1134I14.8	GENCODE	2491	chr8	+	48102394	48104885		CCTTTTGTGATGTAGTGTGGTTCTCATTTTAAACCTTGGAAGGTGAAAATGTACAAACTA	intergenic							466.909	35.2383	8.87833	4.67972	573.376	429.607	397.744	38.1949	36.9033	30.6166	9.29022	8.42621	8.91856	4.73005	4.86033	4.4488
ASHGA5P018928	0.000619614	0.00763144	3.73746	up	noncoding	NR_036510	UROD	RefSeq	1458	chr1	+	45477804	45481341		AAGCGAATGGGTTGGGCCTCCAGCGTAGCATACTGACACCTACCCCCACCCCCACCTGAT	exon sense-overlapping	NM_000374	UROD	uroporphyrinogen decarboxylase	+	45477804	45481341	4610.01	1428.99	12.1447	10.2426	4940.02	4397.75	4492.25	1583.29	1388.01	1315.68	12.3187	11.7875	12.328	10.3295	10.3122	10.0863
ASHGA5P034130	0.0110235	0.0410702	3.02703	up	noncoding	uc002nqv.3	BC030765	UCSC_knowngene	1112	chr19	-	22798358	22806773	TCONS_00026955	AACTGAACAATACACATGCAGCGTAAGAATGTTGTCGCTGCCACCAGCCACTTACAGATA	intergenic							14.7508	8.79536	4.31851	2.72061	10.051	14.277	19.9243	8.70514	10.716	6.96493	3.95671	4.00629	4.99253	2.64519	2.94996	2.56667
ASHGA5P022071	1.37187e-05	0.00152133	14.2378	up	noncoding	ENST00000548443	CTD-2314B22.2	pseudogene	597	chr14	-	19832616	19857070	ENST00000553214	AACCACGTAAGATTTTTTCAGAGTACCTTCAAGTTTAAATCTAAGAGTGATATTCATTTG								59.142	5	6.17498	2.34333	48.3698	67.2223	61.8338	5	5	5	6.03611	6.01536	6.47347	2.34074	2.34646	2.34278
ASHGA5P057357	0.0116946	0.0427378	3.62389	up	noncoding	TCONS_00016312	XLOC_007680	LincRNAs identified by Cabili et al	410	chr9	-	36313543	36315318		TATCAGAAAGCAATTTATAGATTAGCCACTGCGCCCAGCCGACACTTCTGTCTTGAAAGC	intergenic							1459.09	483.977	10.4892	8.63164	1626.02	1221.34	1529.91	488.463	611.861	351.607	10.7645	9.88435	10.8187	8.61845	9.14769	8.12878
ASHGA5P037587	0.000144526	0.00386725	6.65341	up	noncoding	ENST00000447720	LINC00281	GENCODE	3215	chr22	-	21655278	21679331	ENST00000436681, ENST00000440673, ENST00000451257	CACCGTACACGACATCACTAACGAGGACGCCACACACGACATCGCTAACGAGGATACTGT	intergenic							55.1487	14.707	6.04637	3.31228	38.734	75.2271	51.4849	15.4824	11.9536	16.6851	5.74503	6.16002	6.23406	3.32144	3.10189	3.5135
ASHGA5P033585	2.05531e-05	0.00170952	10.2957	up	noncoding	TCONS_00028623	XLOC_013658	LincRNAs identified by Cabili et al	652	chr20	-	12915531	12916654		GATGGTGGTGAGATGGGTGAGAAGGAACCAAGGGCGGAGGGAGACAAGGGCTGTTGCAGG	intergenic							56.4883	8.83356	6.07864	2.71468	53.8876	76.2881	39.2892	9.87562	10.2758	6.34922	6.17206	6.17757	5.88631	2.72201	2.89924	2.52279
ASHGA5P058052	0.0136965	0.0470724	2.0464	up	noncoding	TCONS_00025785	XLOC_012594	LincRNAs identified by Cabili et al	477	chr17	-	80340700	80341524		ATGCAGGACCGCAGGCTGCAGGCTCCCATTTGGCAGAAAGGACTTTTGCTGAAATCCCCA	intergenic							13.3978	13.3479	4.21557	3.18248	11.2119	17.1422	11.8393	9.72083	15.2633	15.0597	4.10021	4.24851	4.298	2.71028	3.47934	3.35781
ASHGA5P049019	1.62446e-05	0.0016084	2.32589	up	noncoding	ENST00000562807	ERVK13-1	GENCODE	594	chr16	-	2713082	2721462	ENST00000566343, NR_040023	TGTGAGAAGCCCCCTTCCCAGTGAACTTTCCCTTGTGTGCCCGCGTGGACAGCCAACAGG	intergenic							3754.29	1861.68	11.8442	10.6264	3668.74	4381.39	3212.73	1948.8	1817.78	1818.46	11.8947	11.7825	11.8554	10.6302	10.6886	10.5604
ASHGA5P057217	0.0261518	0.0716618	2.77099	up	noncoding	TCONS_00014720	XLOC_006810	LincRNAs identified by Cabili et al	206	chr8	+	59129760	59131635		CATCTACAAGGTTTCAGAGAGGCTCCATCTGATTGTGGATATTTTGCAAATGAATGGATT	intergenic							47.7654	30.3294	5.8893	4.4189	55.5984	36.1071	51.5907	34.9403	34.6608	21.3873	6.21272	5.21896	6.23622	4.59776	4.75969	3.89925
ASHGA5P048634	0.000106594	0.00339562	3.69498	up	noncoding	ENST00000499797	RP11-325N19.3	GENCODE	2730	chr15	+	40213242	40217100		GGCTGGAAGCGTGGGAGGCCGGAGGATCAGTGACTGGCTGTCGTGGACATGCTCGCTACA	bidirectional	NM_007223	GPR176	probable G-protein coupled receptor 176	-	40092930	40213093	39.6671	19.5371	5.64928	3.76372	31.5916	48.6411	38.7686	21.6784	18.0151	18.9178	5.47533	5.60293	5.86959	3.84471	3.73755	3.70889
ASHGA5P015609	1.22937e-06	0.000781006	9.63921	up	noncoding	ENST00000421889	MBL1P	GENCODE	642	chr10	+	81691466	81710092		AATCACCAGGCAAGAAGAGGATTGGAGGAATGCCTTTGTCCCCCTTCAATCCCGGGGGTC	natural antisense	NM_003019	SFTPD	pulmonary surfactant-associated protein D precursor	-	81697495	81708861	6265.61	758.368	12.608	9.33905	6376.76	7043.52	5376.54	772.501	672.194	830.41	12.6823	12.5196	12.622	9.29681	9.28001	9.44032
ASHGA5P014878	0.00332874	0.0193324	2.26784	up	noncoding	ENST00000414282	SNHG7	GENCODE	2357	chr9	-	139615817	139622636		TGGAATAAAGAGTAACAAACCCCCTTGGAGGACTCTCCTGCCGGGATGTCCATGTCCGCC	natural antisense	NM_152421	FAM69B	protein FAM69B	+	139607023	139619170	591.029	315.178	9.20721	8.02589	638.545	597.271	537.272	338.879	309.448	297.208	9.43695	8.8624	9.32229	8.06805	8.11956	7.89007
ASHGA5P041173	0.00165095	0.0128608	3.40137	up	noncoding	TCONS_00021223	XLOC_009911	LincRNAs identified by Cabili et al	541	chr12	+	121342904	121345743		AAGTGAATCTGGAGCTTAGATGGAGAGAGAAGAGAGAGATTAATTGAGGCCCCAGGTACT	intergenic							14.9831	6.55424	4.28236	2.51624	13.3828	22.8594	8.70717	5	8.136	6.52674	4.33478	4.62278	3.8895	2.34074	2.67239	2.5356
ASHGA5P055489	0.000712472	0.00814264	3.73985	up	noncoding	TCONS_00029007	XLOC_013931	LincRNAs identified by Cabili et al	1493	chr21	+	37477279	37481023		TGTGTGTGTGCATGAATGATCACAAATAACCCTACCTGCGGTGTTGTTCATGTGGATGGT	intergenic							2965.54	873.467	11.4566	9.55363	2025.18	4218.12	2653.31	895.698	834.557	890.147	11.0656	11.7334	11.5708	9.52554	9.59883	9.53651
ASHGA5P026335	0.00141996	0.0117738	5.61207	up	noncoding	CR749501		LincRNAs identified by Khalil et al	4374	chr5	+	80201444	80205745		TTAAAGCCAAGAGATAGAAAACCAAAAGATATTCAAATAATTCAAAAGAATCCAGGAAAG	intergenic							28.7973	7.4306	5.09903	2.6105	25.4779	46.4802	14.4339	6.59106	5.08398	10.6167	5.19403	5.54953	4.55353	2.51521	2.45914	2.85715
ASHGA5P048139	0.0204212	0.0608904	2.01043	up	noncoding	ENST00000501817	AP001258.4	GENCODE	2110	chr11	-	58897605	58910228		CTGTCATCAAAAACTCTGTTGGAATGGATTTTAAAATTTCTTAATAAAAGATGAAACATG	natural antisense	ENST00000528737	FAM111A	family with sequence similarity 111, member A [Source:HGNC Symbol;Acc:24725]	+	58910220	58922512	1231.42	723.183	10.2664	9.25886	1311.32	1233.87	1149.07	693.823	864.572	611.155	10.4744	9.90005	10.4247	9.14067	9.64654	8.98936
ASHGA5P016908	0.00872296	0.0355323	4.7662	up	noncoding	ENST00000435585	BX571672.5	GENCODE	336	chr1	-	143216055	143226395	ENST00000344693, ENST00000429521, ENST00000446530, ENST00000456937, ENST00000580195	GCAATCACAGCTAATTTTAAAACATGCACTCTGACAGAAAAGACATCTGAGAAACAAAAC	intergenic							74.5703	28.0607	6.47382	4.22098	66.8453	90.9197	65.946	33.3006	36.3628	14.5187	6.46112	6.3991	6.56125	4.52334	4.83717	3.30245
ASHGA5P056505	0.000202066	0.00442675	2.18463	up	noncoding	TCONS_00005052	XLOC_001933	LincRNAs identified by Cabili et al	410	chr2	-	739587	740177	TCONS_00005053	CCCTCGCCAGGCTCTAACCCAAGATCCTCGCTGCCTCTCCAGCTTTCCTGGTGCCCGCAG	intergenic							1052.05	559.899	10.0176	8.89023	1004.16	1228.61	923.379	626.705	522.851	530.142	10.0759	9.89366	10.0833	8.98909	8.90159	8.78
ASHGA5P056312	0.000476652	0.00670168	2.60883	up	noncoding	TCONS_00002231	XLOC_000565	LincRNAs identified by Cabili et al	791	chr1	+	219092181	219098186		GGTAGCGTAACAACACGAGTGTCTCAGCTCCCCACTTCTCTCCTTTCTCCTGGAAATTCC	intergenic							1939.31	859.329	10.9147	9.53126	1873.42	2073.17	1871.33	892.395	832.084	853.509	10.964	10.6716	11.1084	9.51975	9.59273	9.48131
ASHGA5P015697	0.000346259	0.00573044	2.65699	up	noncoding	ENST00000422716	BX571672.5	GENCODE	602	chr1	-	143213236	143240439	ENST00000424820	AGTCACTGAACTTGAGCTATTTGGTGTTGATGTTGGAATTTCTGATGAATCTGCAGTCAG	intergenic							11.6674	8.12065	4.05307	2.64328	11.2211	12.6645	11.1166	10.4419	6.11552	7.80455	4.10159	3.8526	4.20502	2.77028	2.5403	2.61925
ASHGA5P042644	0.000576187	0.00736921	2.05071	up	noncoding	TCONS_00019400	XLOC_009223	LincRNAs identified by Cabili et al	263	chr11	+	77350819	77352358		GGTTATGATGTTCTGATCTGGCCACCCCGTCCCCATCTCCTGGGACTGTTCACATCTCAG	intergenic							2032.18	1150.43	10.9755	9.93934	1980.18	2231.84	1884.5	1193.92	1096.04	1161.31	11.0368	10.7748	11.1148	9.94093	9.96855	9.90852
ASHGA5P029237	0.00294293	0.0179938	2.24823	up	noncoding	ENST00000556207	RP11-270M14.4	GENCODE	358	chr14	-	76280844	76303554		AAGACCTAAGGGCAGGGAAAATCTCCCAGTATCGGATGAGACCTTAATAAACCCTACAAG	intronic antisense	NM_015072	TTLL5	tubulin polyglutamylase TTLL5	+	76127550	76421425	3864.98	1976.41	11.8814	10.7126	3362.6	4037.12	4195.21	2039.69	1909.95	1979.58	11.7539	11.6551	12.2352	10.6938	10.7591	10.685
ASHGA5P058368	6.25732e-06	0.00116829	7.08833	up	noncoding	uc002bnv.2	LOC254559	UCSC_knowngene	4113	chr15	+	89911329	89941718	ENST00000561327	CCCCGACCAGTTACTCCCCTGCTGGTGCCTCCCTCCTTGGCGCGCTTCCCACCTGCGATC	intergenic							55575.7	9990.94	15.9145	13.0891	57128.8	62670.3	46928.2	10762.8	8776.5	10433.5	15.9439	15.9565	15.8432	13.1542	12.9242	13.1888
ASHGA5P014903	4.91496e-05	0.00246299	12.9625	up	noncoding	ENST00000414600	AC005152.2	GENCODE	742	chr17	-	70086599	70137921		ATATTTTGAGGTTCATCTCAAAGATCTCTCTTTGCATAATGTGTGTGTGGACCTGCCTAC	intronic antisense	NM_000346	SOX9	transcription factor SOX-9	+	70117160	70122560	855.529	84.3223	9.71208	6.0158	689.661	947.075	929.851	94.2432	77.9001	80.8236	9.54228	9.50006	10.0939	6.10903	6.01547	5.92291
ASHGA5P052946	0.00113771	0.0103636	3.20141	up	noncoding	ENST00000497320	AC093627.9	GENCODE	429	chr7	-	148327	149466		CTGCGCAAGCGCAGAGTGAAGGGCCGGGAACAGTGGAGGGTGCGAGGAAGACAATGGGGG	intergenic							29.1989	17.4368	5.2569	3.57819	23.3671	34.7092	29.5202	15.6865	15.9173	20.7067	5.07969	5.1686	5.52239	3.33835	3.54315	3.85306
ASHGA5P023359	3.74178e-06	0.000982542	13.5617	up	noncoding	ENST00000579258	LRRC37A11P	pseudogene	3698	chr17	+	37183529	37201600		CATTGGTGAAGATGTATGGAAAGCATACAGTTGGACTGAGAAACTATTCTCAATGAAAAT								127.36	15.6848	7.17841	3.41695	112.687	147.366	122.026	17.2006	14.2291	15.6246	7.16145	7.01081	7.36298	3.46854	3.37141	3.41091
ASHGA5P053432	0.000155146	0.00398884	7.60939	up	noncoding	ENST00000518524	CTD-2571E19.1	pseudogene	679	chr8	+	63023082	63023761		CCCATTACTGGTATGTAGATCAGAGAAAATACAGTTCATGTCCTCATGGAAGATATGGCT								84.7638	18.5088	6.60085	3.67307	62.578	118.564	73.1488	16.5245	21.4277	17.5742	6.37245	6.73463	6.69547	3.41253	4.00973	3.59694
ASHGA5P029275	0.0121297	0.0436552	2.75003	up	noncoding	ENST00000556144	RP11-226P1.2	GENCODE	383	chr14	-	82200955	82209482		GAAAAATCTCCCAAGTTATGTTCATAGGCTTAGCAGAATAAAGGTAAGGCTTACTAGTTA	intergenic							7185.54	2776.11	12.6724	11.213	6517.1	11301.7	3737.79	2725.31	2739.62	2863.4	12.7185	13.2231	12.0757	11.1202	11.2649	11.2538
ASHGA5P047115	0.000512901	0.00696089	3.10959	up	noncoding	TCONS_00013653	XLOC_006309	LincRNAs identified by Cabili et al	1044	chr7	+	156696054	156714884		GAAAAACTCCTCTGCTGCTTCTTCCTCTGATTTCACATTCGGTAAACCTGCAAGTGCACA	intergenic							1484.41	558.983	10.5224	8.88564	1380.06	1722.64	1350.54	610.444	589.87	476.637	10.544	10.3853	10.6379	8.94871	9.09364	8.61458
ASHGA5P057873	0.00126975	0.011147	3.58837	up	noncoding	TCONS_00022885	XLOC_011138	LincRNAs identified by Cabili et al	2110	chr14	-	102414634	102419663	TCONS_00022884	TCCTCTCTTAATACTGCATCTTCAGAATTAAAACTGTGGTGGGCCAGGCTCCTTTTGGTG	intergenic							178.253	72.8042	7.59227	5.74894	157.486	231.069	146.203	64.1794	57.1616	97.0716	7.58662	7.58619	7.604	5.51871	5.52353	6.20459
ASHGA5P023215	0.000223514	0.00463884	5.25334	up	noncoding	ENST00000574041	RP11-1055B8.3	GENCODE	566	chr17	-	79353397	79359046	ENST00000572301	GAAGCTCATGGGGAGTGAAGGGACAGGATGGAGCGGGAGCGGCGCCAAAGCACGGGGAGA	intergenic							34.9043	12.5089	5.47616	3.08293	28.0599	46.2373	30.4156	14.5756	13.3834	9.56761	5.32235	5.54261	5.56352	3.22964	3.27985	2.73929
ASHGA5P057095	0.00410481	0.0220518	2.15405	up	noncoding	TCONS_00013058	XLOC_006210	LincRNAs identified by Cabili et al	505	chr7	+	112258125	112260698		TTATCTTCTTCAGCAAGTTCTTCTTTCAGTTCTGTAATCCCAACAATTTGGGAGGCCAAG	intergenic							47.6454	36.0085	5.82578	4.71873	45.1518	68.9538	28.8305	34.9201	33.5123	39.593	5.94209	6.04778	5.48746	4.59675	4.70562	4.85381
ASHGA5P031503	0.000359976	0.00585415	2.67558	up	noncoding	ENST00000571433	RP11-461A8.2	GENCODE	566	chr16	+	3666090	3667361		CCACTGCTGCCTTTGTGTGATTTTGCTCTATATGTTCTGCTAGACAAATTTAAGGGAGGT	intergenic							2892.06	1225.45	11.447	10.0272	2686.71	3445.3	2544.17	1251.15	1328.86	1096.34	11.4326	11.4027	11.5057	10.007	10.2493	9.82515
ASHGA5P042054	0.0115418	0.0423754	2.98594	up	noncoding	TCONS_00021007	XLOC_010268	LincRNAs identified by Cabili et al	752	chr12	-	131895170	131896691		TACCATGACAAAGAGTTAAGACAATCTCATTAGAAGACAGAGGAGGTGGGGCTGGACCAT	intergenic							15.4564	9.87727	4.3679	2.78972	9.60481	15.9361	20.8284	10.7472	10.2748	8.60981	3.896	4.15375	5.05396	2.80243	2.8988	2.66791
ASHGA5P049852	0.000854107	0.00897587	2.33338	up	noncoding	NR_028133	EXOC7	RefSeq	4828	chr17	-	74077085	74099652		CGCACCCAGCGAGGAGATGGGGTTGGGGGCTAGGCCGTGGGGTTGGGACGCAGTGGTCTC	exon sense-overlapping	NM_001013839	EXOC7	exocyst complex component 7 isoform 1	-	74077085	74099868	198.818	118.145	7.74387	6.52145	201.151	215.507	179.797	118.712	109.456	126.266	7.88912	7.485	7.85748	6.44545	6.5302	6.58869
ASHGA5P049852	0.000854107	0.00897587	2.33338	up	noncoding	NR_028133	EXOC7	RefSeq	4828	chr17	-	74077085	74099652		CGCACCCAGCGAGGAGATGGGGTTGGGGGCTAGGCCGTGGGGTTGGGACGCAGTGGTCTC	exon sense-overlapping	NM_001145297	EXOC7	exocyst complex component 7 isoform 4	-	74077085	74099868	198.818	118.145	7.74387	6.52145	201.151	215.507	179.797	118.712	109.456	126.266	7.88912	7.485	7.85748	6.44545	6.5302	6.58869
ASHGA5P049852	0.000854107	0.00897587	2.33338	up	noncoding	NR_028133	EXOC7	RefSeq	4828	chr17	-	74077085	74099652		CGCACCCAGCGAGGAGATGGGGTTGGGGGCTAGGCCGTGGGGTTGGGACGCAGTGGTCTC	exon sense-overlapping	NM_001145298	EXOC7	exocyst complex component 7 isoform 5	-	74077085	74099868	198.818	118.145	7.74387	6.52145	201.151	215.507	179.797	118.712	109.456	126.266	7.88912	7.485	7.85748	6.44545	6.5302	6.58869
ASHGA5P049852	0.000854107	0.00897587	2.33338	up	noncoding	NR_028133	EXOC7	RefSeq	4828	chr17	-	74077085	74099652		CGCACCCAGCGAGGAGATGGGGTTGGGGGCTAGGCCGTGGGGTTGGGACGCAGTGGTCTC	exon sense-overlapping	NM_001145299	EXOC7	exocyst complex component 7 isoform 6	-	74077085	74099868	198.818	118.145	7.74387	6.52145	201.151	215.507	179.797	118.712	109.456	126.266	7.88912	7.485	7.85748	6.44545	6.5302	6.58869
ASHGA5P049852	0.000854107	0.00897587	2.33338	up	noncoding	NR_028133	EXOC7	RefSeq	4828	chr17	-	74077085	74099652		CGCACCCAGCGAGGAGATGGGGTTGGGGGCTAGGCCGTGGGGTTGGGACGCAGTGGTCTC	exon sense-overlapping	NM_015219	EXOC7	exocyst complex component 7 isoform 2	-	74077085	74099868	198.818	118.145	7.74387	6.52145	201.151	215.507	179.797	118.712	109.456	126.266	7.88912	7.485	7.85748	6.44545	6.5302	6.58869
ASHGA5P049852	0.000854107	0.00897587	2.33338	up	noncoding	NR_028133	EXOC7	RefSeq	4828	chr17	-	74077085	74099652		CGCACCCAGCGAGGAGATGGGGTTGGGGGCTAGGCCGTGGGGTTGGGACGCAGTGGTCTC	natural antisense	NM_180990	ZACN	zinc-activated ligand-gated ion channel precursor	+	74075262	74078885	198.818	118.145	7.74387	6.52145	201.151	215.507	179.797	118.712	109.456	126.266	7.88912	7.485	7.85748	6.44545	6.5302	6.58869
ASHGA5P049220	0.000619052	0.00762929	3.73558	up	noncoding	ENST00000571523	RP11-44F14.11	GENCODE	2929	chr16	-	53524951	53527880		GGAACACCCAAAAATATTTTTAAATATATCACCTTAATAGACATTTCTTTTAGATAACTC	exon sense-overlapping	NM_001012398	AKTIP	AKT-interacting protein	-	53525191	53537170	750.059	245.159	9.53607	7.63474	732.363	786.586	731.229	238.766	264.587	232.125	9.6208	9.24609	9.74131	7.51639	7.88577	7.50206
ASHGA5P049220	0.000619052	0.00762929	3.73558	up	noncoding	ENST00000571523	RP11-44F14.11	GENCODE	2929	chr16	-	53524951	53527880		GGAACACCCAAAAATATTTTTAAATATATCACCTTAATAGACATTTCTTTTAGATAACTC	exon sense-overlapping	NM_022476	AKTIP	AKT-interacting protein	-	53525191	53537170	750.059	245.159	9.53607	7.63474	732.363	786.586	731.229	238.766	264.587	232.125	9.6208	9.24609	9.74131	7.51639	7.88577	7.50206
ASHGA5P049220	0.000619052	0.00762929	3.73558	up	noncoding	ENST00000571523	RP11-44F14.11	GENCODE	2929	chr16	-	53524951	53527880		GGAACACCCAAAAATATTTTTAAATATATCACCTTAATAGACATTTCTTTTAGATAACTC	natural antisense	NM_005611	RBL2	retinoblastoma-like protein 2	+	53468350	53525560	750.059	245.159	9.53607	7.63474	732.363	786.586	731.229	238.766	264.587	232.125	9.6208	9.24609	9.74131	7.51639	7.88577	7.50206
ASHGA5P048594	0.0240978	0.0679722	2.0005	up	noncoding	ENST00000566138	ULK4P3	GENCODE	533	chr15	+	30395924	30406231		GCATTTTCAGGTAGGATCATAAAGGACTTATCGAACATGTAGACTGTCTGTATACAGATA	intergenic							10.4313	9.63254	3.83202	2.83167	6.89751	15.4444	8.95208	5.56909	10.2468	13.0817	3.46036	4.11152	3.9242	2.44634	2.8964	3.15226
ASHGA5P055790	0.000293578	0.00527478	11.0005	up	noncoding	uc001veb.2	DLEU2	UCSC_knowngene	722	chr13	-	50623324	50656139	ENST00000449579	TTTTACCAAGGTAAAGATCAAATTTTATAAATTTACTTGTTTGTTTATACAAGGAAAAAT	bidirectional	ENST00000378180	DLEU1	deleted in lymphocytic leukemia 1 (non-protein coding) [Source:HGNC Symbol;Acc:13747]	+	50656306	50679433	178.676	25.5354	7.61549	4.156	177.744	191.868	166.418	23.0571	32.7673	20.7817	7.73604	7.34019	7.77024	3.93906	4.6703	3.85863
ASHGA5P021393	0.00096595	0.00956003	2.26227	up	noncoding	ENST00000531617	CTD-2514K5.2	GENCODE	536	chr17	-	72208812	72209447		TTGTCACAGGCCCTGTGGACTTAAAAAGAGAAATAAGACGCCGTCCCTGCCCTCGGGAGC	bidirectional	NM_032646	TTYH2	protein tweety homolog 2 isoform 1	+	72209695	72258157	254.561	150.907	8.07894	6.90117	255.207	272.983	235.494	159.139	144.66	148.921	8.2119	7.81576	8.20917	6.90523	6.95535	6.84294
ASHGA5P050150	2.56833e-05	0.00184601	9.01559	up	noncoding	ENST00000472297	RP11-255H23.2	pseudogene	1931	chr19	+	23973573	24016116		CCCTAACTAGATATAAGAGGATGCACAGAAGAAAGAAACTCTACAAATGTGAAGAATGTG								37.0105	5	5.51575	2.34333	26.5252	54.4861	30.0201	5	5	5	5.25116	5.74996	5.54613	2.34074	2.34646	2.34278
ASHGA5P046967	7.81484e-06	0.00130428	11.1602	up	noncoding	ENST00000477192	RP11-773D16.1	GENCODE	800	chr10	-	81564240	81585538		GGCTGTGGGTTGTGCCCTTCACTCCTTGCCCTCCTCCATTCCCTGTCCTGATCTGAACTC	intergenic							47487	5498.02	15.6828	12.2025	47769.7	54889.4	39801.8	5774.59	6000.38	4719.09	15.666	15.7486	15.6337	12.2212	12.3877	11.9986
ASHGA5P032467	0.00080363	0.00868644	12.0617	up	noncoding	uc021tyo.1	AX747150	UCSC_knowngene	2331	chr17	-	43590733	43593064		GATCTCCCACTTTGCTCATGTAGAGAGTGAAATATAGATTAGGGCACAAGATGAACTGTA	intronic antisense	ENST00000253803	AC091132.2	Uncharacterized protein [Source:UniProtKB/TrEMBL;Acc:H7BXE8]	+	43580625	43611631	8002.58	689.19	12.7952	9.20283	5219.84	14049.8	4738.11	719.976	706.973	640.622	12.4078	13.5647	12.4131	9.19352	9.35529	9.05968
ASHGA5P015513	1.92502e-05	0.00170952	4.61124	up	noncoding	ENST00000420968	ZDHHC8P1	GENCODE	1736	chr22	-	23733563	23744759		GGCTGATCAGAACCCCTTCCGAGACCCTGCTCAGCTGGCCCAGCCCCTGCCCCTGTGTTA	intergenic							6110.88	1546.96	12.5675	10.3623	6356.39	6523.86	5452.39	1594.79	1483.88	1562.21	12.6772	12.3857	12.6394	10.3416	10.4014	10.3439
ASHGA5P047423	0.023257	0.0663032	2.3402	up	noncoding	AK123317		LincRNAs identified by Khalil et al	2689	chr2	+	62378431	62381119		CCTCTAGCACAATCATTTTCTGTTCCTGATGGAACAATGAGAAGGGTGGGGGATGAAAAT	intergenic							34.4718	26.1756	5.44894	4.22231	26.3465	30.3113	46.7577	26.1308	26.6048	25.7913	5.24254	4.99616	6.10813	4.13839	4.34608	4.18246
ASHGA5P018102	0.000321263	0.0055017	5.63834	up	noncoding	ENST00000449463	RP3-390M24.1	GENCODE	387	chr6	-	79314183	79315753		GTGATCTAATAATTTAAGAAAGAAGTGATTATGCTGTTGAAATCGTGAAGATTTTACAGG	intergenic							114.529	32.1658	7.01986	4.52459	93.0775	143.577	106.932	35.605	35.6941	25.1983	6.89261	6.97905	7.18792	4.62248	4.80708	4.1442
ASHGA5P054429	0.00270273	0.017104	2.17653	up	noncoding	uc001jab.4	ZNF37BP	UCSC_knowngene	10239	chr10	-	43008960	43048256		AGAAAGGTCTGTAAGTTATCTATTTCGGCTTTATTTAAAAGATGGGATGGGGTGGGGTGG	intergenic							72.0422	52.9588	6.43063	5.3086	58.8199	82.2753	75.0315	50.3237	52.1467	56.4061	6.28733	6.27255	6.73201	5.15348	5.38783	5.38449
ASHGA5P057159	0.0263136	0.0719749	3.36053	up	noncoding	TCONS_00013857	XLOC_006488	LincRNAs identified by Cabili et al	593	chr7	-	67997951	67998711		TATTTGGAAGGAGGAAGGAGTGCACAGACACAGAACAGCAGACCCCAGGCTGATGCGGAT	intergenic							26.6614	12.2732	4.81181	3.06312	12.2381	54.3209	13.4251	14.6955	13.2182	8.90577	4.22021	5.7459	4.46931	3.24064	3.2608	2.68791
ASHGA5P038225	0.0063295	0.0289554	2.74586	up	noncoding	TCONS_00015369	XLOC_006934	LincRNAs identified by Cabili et al	2043	chr8	+	135768683	135779490	TCONS_00014865, TCONS_00015367, TCONS_00015368, TCONS_00015370	ATTCTGGAGAAGAACATGGCAGTATACTCAGTCACATTCCAGTCGCACAGCCTGTGATTT	intergenic							11.3297	6.06137	3.93327	2.47602	6.54415	16.1262	11.3189	6.10203	7.08208	5	3.39902	4.16965	4.23115	2.48373	2.60155	2.34278
ASHGA5P034102	0.01599	0.0518962	2.35317	up	noncoding	ENST00000451054	RP11-465B22.3	GENCODE	565	chr1	+	999897	1001821	ENST00000412397, ENST00000433695	CGGTGTAGCAGGAAGAGCCCATTGATGGGGAAGGTGGGGGCGGTTGTGCACCTCAAGCAG	intergenic							30.9352	23.7608	5.30608	4.07147	21.8924	30.7569	40.1562	24.1617	23.6334	23.4872	4.98979	5.01388	5.91456	4.0148	4.16351	4.0361
ASHGA5P020530	0.000156953	0.00400268	5.44694	up	noncoding	ENST00000515319	RP11-325D5.3	GENCODE	905	chrX	-	2405022	2407012		GGACGAGCAGGTTGCTGCCAGAGAGCCTGCTTCCTGCTGCCTGCCGAAATTTCACTTTGC	exon sense-overlapping	NM_001171135	ZBED1	zinc finger BED domain-containing protein 1	-	2404454	2418580	2442.12	521.96	11.2224	8.77699	2494.17	2428.68	2403.52	553.342	440.079	572.46	11.3372	10.9048	11.4253	8.80082	8.64126	8.88887
ASHGA5P020530	0.000156953	0.00400268	5.44694	up	noncoding	ENST00000515319	RP11-325D5.3	GENCODE	905	chrX	-	2405022	2407012		GGACGAGCAGGTTGCTGCCAGAGAGCCTGCTTCCTGCTGCCTGCCGAAATTTCACTTTGC	exon sense-overlapping	NM_001171136	ZBED1	zinc finger BED domain-containing protein 1	-	2404454	2419008	2442.12	521.96	11.2224	8.77699	2494.17	2428.68	2403.52	553.342	440.079	572.46	11.3372	10.9048	11.4253	8.80082	8.64126	8.88887
ASHGA5P020530	0.000156953	0.00400268	5.44694	up	noncoding	ENST00000515319	RP11-325D5.3	GENCODE	905	chrX	-	2405022	2407012		GGACGAGCAGGTTGCTGCCAGAGAGCCTGCTTCCTGCTGCCTGCCGAAATTTCACTTTGC	exon sense-overlapping	NM_004729	ZBED1	zinc finger BED domain-containing protein 1	-	2404454	2419008	2442.12	521.96	11.2224	8.77699	2494.17	2428.68	2403.52	553.342	440.079	572.46	11.3372	10.9048	11.4253	8.80082	8.64126	8.88887
ASHGA5P020530	0.000156953	0.00400268	5.44694	up	noncoding	ENST00000515319	RP11-325D5.3	GENCODE	905	chrX	-	2405022	2407012		GGACGAGCAGGTTGCTGCCAGAGAGCCTGCTTCCTGCTGCCTGCCGAAATTTCACTTTGC	intron sense-overlapping	NM_145177	DHRSX	dehydrogenase/reductase SDR family member on chromosome X precursor	-	2137554	2419015	2442.12	521.96	11.2224	8.77699	2494.17	2428.68	2403.52	553.342	440.079	572.46	11.3372	10.9048	11.4253	8.80082	8.64126	8.88887
ASHGA5P015895	6.17207e-06	0.00116829	3.56153	up	noncoding	NR_047517	HOTAIR	RefSeq	2370	chr12	-	54356091	54368740	ENST00000424518	GAAGGAAAGCCCTCCAGCCTCCAGGCCCTGCCTTCTGCCTGCACATTCTGCCCTGATTTC	intronic antisense	NM_014212	HOXC11	homeobox protein Hox-C11	+	54366909	54370203	9311.78	3024.85	13.1794	11.3469	9444.27	10195.3	8295.76	3200.95	2926.45	2947.13	13.2345	13.0707	13.233	11.3682	11.3687	11.3039
ASHGA5P034136	0.00479594	0.0242782	2.68354	up	noncoding	NR_027301	LOC148189	RefSeq	2085	chr19	-	28281400	28284848		CATGATGTTTTCTACTTATATTTTATTCAAAAATTTTATACTTTAAGTTCTTACCTTTAG	intergenic							148.918	80.4076	7.34822	5.92408	112.455	197.788	136.511	91.7477	89.5586	59.9166	7.15891	7.37455	7.51119	6.06718	6.23052	5.47455
ASHGA5P021173	0.00158547	0.0125803	2.24931	up	noncoding	ENST00000526897	RP11-802E16.3	GENCODE	791	chr11	+	67819559	67821161		CAGGAAGACGGACATTTCATATATATGGATTTCACAGCTACACTCGATCCACGCCCCACA	natural antisense	NM_001277	CHKA	choline kinase alpha isoform a	-	67820325	67888858	236.496	142.092	7.97791	6.80843	249.291	255.373	204.825	137.768	142.917	145.591	8.18166	7.72348	8.0286	6.68395	6.93754	6.8038
ASHGA5P021173	0.00158547	0.0125803	2.24931	up	noncoding	ENST00000526897	RP11-802E16.3	GENCODE	791	chr11	+	67819559	67821161		CAGGAAGACGGACATTTCATATATATGGATTTCACAGCTACACTCGATCCACGCCCCACA	natural antisense	NM_212469	CHKA	choline kinase alpha isoform b	-	67820325	67888858	236.496	142.092	7.97791	6.80843	249.291	255.373	204.825	137.768	142.917	145.591	8.18166	7.72348	8.0286	6.68395	6.93754	6.8038
ASHGA5P037471	0.000796204	0.00865218	2.03681	up	noncoding	TCONS_00024499	XLOC_011816	LincRNAs identified by Cabili et al	1375	chr16	+	86773463	86775053		AGTCATCGGCATCACAGCAAAACAAAAACACACACACAACAGAAGAAACCACGCTGGTGA	intergenic							101.196	74.7707	6.86407	5.83776	84.8015	123.91	94.8749	75.8696	75.808	72.6343	6.76716	6.7832	7.04184	5.77366	5.9747	5.76491
ASHGA5P047524	0.00414358	0.0221651	2.8973	up	noncoding	ENST00000434097	RP13-39P12.3	GENCODE	759	chr10	+	79542623	79551665		AGAGACGAGTTTGTAAGAATGCCAAAGTCACCTTCCCCATTGTGGGAGGAAAATGCCAAA	natural antisense	NM_004747	DLG5	disks large homolog 5	-	79550548	79686348	422.344	186.403	8.75585	7.22114	463.543	396.273	407.216	183.334	203.714	172.161	9.00444	8.3141	8.949	7.11633	7.49268	7.05441
ASHGA5P050569	0.000952593	0.00948931	2.22889	up	noncoding	ENST00000471661	AC008268.2	GENCODE	1569	chr2	+	96455401	96463594	ENST00000417140, ENST00000428300, ENST00000458519	ACAAGGGTCAGATGAAGATGGTCCAGAAGGCCGCCCAGGCAGTAAGGCCCGCCCTCCATT	intergenic							27.2726	23.1999	5.18018	4.02385	25.4216	30.0028	26.3936	25.3243	19.7535	24.5218	5.1913	4.98168	5.36756	4.08939	3.88058	4.10159
ASHGA5P040087	0.000923704	0.00934331	2.35802	up	noncoding	TCONS_00023087	XLOC_010981	LincRNAs identified by Cabili et al	554	chr14	-	27307504	27311919	TCONS_00022690	TCTTTTACAAGCATTTACTTTACCAACTGGGAGCTCAGTACCCTCCCCTGTGAAAAACAC	intergenic							3144.3	1529.72	11.5839	10.3463	3197.33	3204.96	3030.6	1588.59	1415.81	1584.75	11.6767	11.3076	11.7674	10.3358	10.3426	10.3606
ASHGA5P029555	0.00258663	0.0167929	2.04231	up	noncoding	ENST00000425648	AL163953.3	GENCODE	553	chr14	+	53836098	53992960		GTTAGATAAACTGGTTGTTGAAACTCCCTGGGCCACTGAGTTTTCTTATTTCTTTTTTTT	intergenic							96.0112	72.5146	6.81747	5.78727	93.316	102.119	92.5989	70.6569	70.6135	76.2734	6.89691	6.54389	7.01162	5.66363	5.85935	5.83883
ASHGA5P040140	0.00896932	0.0361083	2.01957	up	noncoding	ENST00000436680	BX571672.1	GENCODE	552	chr1	+	143119060	143206097	ENST00000432361, uc011mfm.2	CCAGAAATACAGTTCTGCTGCATAGTGAAAAAAGGCCAATTTAGATTCTTTTTCATAGAG	intergenic							18.0813	17.4385	4.59364	3.57959	13.3264	24.051	16.8665	16.2147	20.1141	15.9866	4.3296	4.69195	4.75937	3.3847	3.91114	3.44294
ASHGA5P049263	0.0249379	0.0694663	2.41587	up	noncoding	NR_036684	CES2	RefSeq	4193	chr16	+	66968373	66978994		GCCGCCCAAGGTGGGCTCCTAGAAGCACAGAAAGGGTCGGGCTGGGGGACACCACGGCAA	exon sense-overlapping	NM_003869	CES2	cocaine esterase isoform 1	+	66968346	66978994	15.3708	12.634	4.36922	3.09667	10.9493	21.1612	14.0018	8.95571	18.1171	10.8291	4.06976	4.51979	4.5181	2.65892	3.74685	2.88425
ASHGA5P049263	0.0249379	0.0694663	2.41587	up	noncoding	NR_036684	CES2	RefSeq	4193	chr16	+	66968373	66978994		GCCGCCCAAGGTGGGCTCCTAGAAGCACAGAAAGGGTCGGGCTGGGGGACACCACGGCAA	exon sense-overlapping	NM_198061	CES2	cocaine esterase isoform 2	+	66968346	66978994	15.3708	12.634	4.36922	3.09667	10.9493	21.1612	14.0018	8.95571	18.1171	10.8291	4.06976	4.51979	4.5181	2.65892	3.74685	2.88425
ASHGA5P054444	0.00717779	0.0313019	2.48662	up	noncoding	ENST00000416851	BMS1P1	GENCODE	7989	chr10	-	46744224	46762776		ATAATCAAGGGTAAGTCTGCTTTTTTTCTATTTTTAATAAAAAGATATATTACAGAAGAT	intergenic							15.0631	12.0736	4.36247	3.04828	11.0617	18.237	15.8905	14.5017	13.249	8.47022	4.08363	4.3272	4.67658	3.22028	3.26445	2.66012
ASHGA5P031158	0.00222414	0.0153423	3.00481	up	noncoding	ENST00000569940	RP11-401P9.1	GENCODE	1146	chr16	-	50585734	50587851		AATAATACTAGTTGGATGAGCCACTGTGTCTCCAGCCACTTAGTTGACAGGCCACGTAAA	intronic antisense	NM_033119	NKD1	protein naked cuticle homolog 1	+	50582240	50674771	976.98	387.355	9.90889	8.32161	1064.44	1005.6	860.907	375.452	435.02	351.595	10.1621	9.58618	9.97836	8.21574	8.62051	8.12858
ASHGA5P002846	0.0115243	0.0423641	2.16387	up	noncoding	ENST00000262870	FER1L4	GENCODE	2923	chr20	-	34146506	34166852	NR_024377	AGTTCCGGCAGCCTGCAGTGCTGGTCCTGCAGGATCCCTGGAGTTGCAGCTACCAGACAT	intergenic							18.1854	16.7892	4.63377	3.52015	21.3652	16.5167	16.6742	19.5779	16.257	14.5328	4.95909	4.19969	4.74252	3.67877	3.57742	3.30427
ASHGA5P025359	0.00191402	0.0140443	2.53034	up	noncoding	NR_002785	GNAS-AS1	RefSeq	1158	chr20	-	57393972	57425958		TTGGAAACGAATTGGTCCCTGTCTGCTTCCAAGGGTCCCTGGAACCTTCTGCAGCTGTGC	intronic antisense	NM_016592	GNAS	protein ALEX NESP55	+	57414794	57486250	348.618	179.493	8.50471	7.16538	341.271	362.707	341.877	199.081	175.703	163.694	8.59979	8.19378	8.72056	7.24944	7.26728	6.9794
ASHGA5P029046	0.00173885	0.0132054	3.07194	up	noncoding	TCONS_00010340	XLOC_004829	LincRNAs identified by Cabili et al	1165	chr5	-	55745620	55749277		GAGTGTGTGTGTGTATTTATATTGTTGAGCAGGGATAAAAATATCAGAGGAATATGTACC	intergenic							30771.2	11943.3	14.9824	13.3633	23447	41392.3	27474.2	11687.6	12763.1	11379	14.5842	15.3069	15.0562	13.284	13.4532	13.3526
ASHGA5P056009	0.000215229	0.00455656	9.22619	up	noncoding	NR_029435	FLJ31306	RefSeq	2457	chr14	-	58732082	58764855		TAAAGAAAAGCAAATAGAATCTTATCAGATAAGTGCTTTTATAAGTCTAAATATATTCTT	intronic antisense	NM_002788	PSMA3	proteasome subunit alpha type-3 isoform 1	+	58711522	58738727	80.0226	13.9815	6.45858	3.25285	46.6217	127.282	66.1644	15.1101	13.5583	13.2763	5.98652	6.82272	6.56651	3.28589	3.29992	3.17273
ASHGA5P056009	0.000215229	0.00455656	9.22619	up	noncoding	NR_029435	FLJ31306	RefSeq	2457	chr14	-	58732082	58764855		TAAAGAAAAGCAAATAGAATCTTATCAGATAAGTGCTTTTATAAGTCTAAATATATTCTT	intronic antisense	NM_152132	PSMA3	proteasome subunit alpha type-3 isoform 2	+	58711522	58738727	80.0226	13.9815	6.45858	3.25285	46.6217	127.282	66.1644	15.1101	13.5583	13.2763	5.98652	6.82272	6.56651	3.28589	3.29992	3.17273
ASHGA5P048743	0.00551823	0.0264676	2.09602	up	noncoding	ENST00000560622	RP11-265M18.2	GENCODE	465	chr15	-	63883312	63892938		ATAAGGAACACATCTTGCTTTCAGCATGTGAGAGGAACAAAAGCATTGATGTAAATGTGC	intronic antisense	NM_203373	FBXL22	F-box/LRR-repeat protein 22	+	63889551	63894620	515.744	301.755	9.02148	7.95383	532.347	541.617	473.267	287.473	326.512	291.281	9.19703	8.72453	9.14287	7.80106	8.20599	7.85445
ASHGA5P048743	0.00551823	0.0264676	2.09602	up	noncoding	ENST00000560622	RP11-265M18.2	GENCODE	465	chr15	-	63883312	63892938		ATAAGGAACACATCTTGCTTTCAGCATGTGAGAGGAACAAAAGCATTGATGTAAATGTGC	natural antisense	NM_001256702	USP3	ubiquitin carboxyl-terminal hydrolase 3 isoform 2	+	63796709	63886839	515.744	301.755	9.02148	7.95383	532.347	541.617	473.267	287.473	326.512	291.281	9.19703	8.72453	9.14287	7.80106	8.20599	7.85445
ASHGA5P048743	0.00551823	0.0264676	2.09602	up	noncoding	ENST00000560622	RP11-265M18.2	GENCODE	465	chr15	-	63883312	63892938		ATAAGGAACACATCTTGCTTTCAGCATGTGAGAGGAACAAAAGCATTGATGTAAATGTGC	natural antisense	NM_006537	USP3	ubiquitin carboxyl-terminal hydrolase 3 isoform 1	+	63796709	63886839	515.744	301.755	9.02148	7.95383	532.347	541.617	473.267	287.473	326.512	291.281	9.19703	8.72453	9.14287	7.80106	8.20599	7.85445
ASHGA5P035659	0.0225344	0.0649673	2.53684	up	noncoding	ENST00000414896	AC005104.3	GENCODE	442	chr2	-	242290754	242292519		CCCATCAGAAAATTACTCAAAAAGGGAGTATTTAAAGGAAACTCAAATCAGGAGAACCCG	natural antisense	NM_001008491	SEPT2	septin-2	+	242254722	242293441	108.59	67.9898	6.95318	5.61015	92.068	135.919	97.7821	93.4352	69.9561	40.5782	6.87603	6.90523	7.07829	6.09581	5.84284	4.8918
ASHGA5P035659	0.0225344	0.0649673	2.53684	up	noncoding	ENST00000414896	AC005104.3	GENCODE	442	chr2	-	242290754	242292519		CCCATCAGAAAATTACTCAAAAAGGGAGTATTTAAAGGAAACTCAAATCAGGAGAACCCG	natural antisense	NM_001008492	SEPT2	septin-2	+	242255280	242293441	108.59	67.9898	6.95318	5.61015	92.068	135.919	97.7821	93.4352	69.9561	40.5782	6.87603	6.90523	7.07829	6.09581	5.84284	4.8918
ASHGA5P035659	0.0225344	0.0649673	2.53684	up	noncoding	ENST00000414896	AC005104.3	GENCODE	442	chr2	-	242290754	242292519		CCCATCAGAAAATTACTCAAAAAGGGAGTATTTAAAGGAAACTCAAATCAGGAGAACCCG	natural antisense	NM_004404	SEPT2	septin-2	+	242255280	242293441	108.59	67.9898	6.95318	5.61015	92.068	135.919	97.7821	93.4352	69.9561	40.5782	6.87603	6.90523	7.07829	6.09581	5.84284	4.8918
ASHGA5P035659	0.0225344	0.0649673	2.53684	up	noncoding	ENST00000414896	AC005104.3	GENCODE	442	chr2	-	242290754	242292519		CCCATCAGAAAATTACTCAAAAAGGGAGTATTTAAAGGAAACTCAAATCAGGAGAACCCG	natural antisense	NM_006155	SEPT2	septin-2	+	242254722	242293441	108.59	67.9898	6.95318	5.61015	92.068	135.919	97.7821	93.4352	69.9561	40.5782	6.87603	6.90523	7.07829	6.09581	5.84284	4.8918
ASHGA5P025769	0.00033263	0.00560857	8.16797	up	noncoding	NR_034104	LOC79015	RefSeq	1157	chr20	-	43285091	43300380		TGGGAAGAAGAACTCTTGATGGCCTGCTTCCCATCCTCCATCCTGGAAGACTGATCTGAA	intergenic							7469.12	1071.58	12.8518	9.82185	8636.79	6967.43	6803.15	1185.7	1196.07	832.962	13.1037	12.5004	12.9514	9.93261	10.0869	9.44608
ASHGA5P056968	0.000282417	0.00517802	4.50289	up	noncoding	TCONS_00011673	XLOC_005155	LincRNAs identified by Cabili et al	352	chr6	+	7427119	7453013		ACTGTTTGCGGTGCCATTCCATATAAAGTGAAGGATAACGGCTACAGCATTTTTTGTTAG	intergenic							22.6177	8.58912	4.8849	2.71405	17.105	31.5464	19.2016	6.29241	10.9854	8.48956	4.66931	5.04441	4.94097	2.49628	2.98468	2.66118
ASHGA5P054636	0.00028253	0.00517802	2.8882	up	noncoding	uc010qvl.1	Z49985	UCSC_knowngene	488	chr11	-	214624	215112		TCTATGGTCACACGAGGGGCATTTTCCTTGTTGTAAGTGTAGTCTAAACCAGTAGGAAGG	exon sense-overlapping	NM_001017524	SIRT3	NAD-dependent protein deacetylase sirtuin-3, mitochondrial isoform b	-	215029	236362	837.877	344.346	9.69092	8.16075	840.516	914.533	758.58	336.322	332.133	364.583	9.81557	9.45855	9.79865	8.05508	8.23313	8.19405
ASHGA5P054636	0.00028253	0.00517802	2.8882	up	noncoding	uc010qvl.1	Z49985	UCSC_knowngene	488	chr11	-	214624	215112		TCTATGGTCACACGAGGGGCATTTTCCTTGTTGTAAGTGTAGTCTAAACCAGTAGGAAGG	exon sense-overlapping	NM_012239	SIRT3	NAD-dependent protein deacetylase sirtuin-3, mitochondrial isoform a	-	215029	236362	837.877	344.346	9.69092	8.16075	840.516	914.533	758.58	336.322	332.133	364.583	9.81557	9.45855	9.79865	8.05508	8.23313	8.19405
ASHGA5P054636	0.00028253	0.00517802	2.8882	up	noncoding	uc010qvl.1	Z49985	UCSC_knowngene	488	chr11	-	214624	215112		TCTATGGTCACACGAGGGGCATTTTCCTTGTTGTAAGTGTAGTCTAAACCAGTAGGAAGG	natural antisense	NM_021932	RIC8A	synembryn-A	+	208529	215110	837.877	344.346	9.69092	8.16075	840.516	914.533	758.58	336.322	332.133	364.583	9.81557	9.45855	9.79865	8.05508	8.23313	8.19405
ASHGA5P027261	0.00786723	0.0332626	2.24776	up	noncoding	ENST00000550644	RP11-133N21.10	GENCODE	570	chr12	-	49970622	49971288		AGGATTTTAAATCAAGGGAGAGACAGACACCAGTAAAACCCGAGCACATTCTTCCTTGAG	intronic antisense	ENST00000551063	PRPF40B	PRP40 pre-mRNA processing factor 40 homolog B (S. cerevisiae) [Source:HGNC Symbol;Acc:25031]	+	49962154	50024408	27.0867	22.5217	5.13058	3.96209	25.139	36.1371	19.9841	26.3521	24.5446	16.6686	5.17573	5.2197	4.9963	4.15196	4.22412	3.5102
ASHGA5P048939	0.00259754	0.0168055	2.68499	up	noncoding	TCONS_00025565	XLOC_012393	LincRNAs identified by Cabili et al	2051	chr17	-	13679959	13682238		ATATTTGTCCCCTTCCTTTCCACAGTCATCCTCTCAGCTCTTAATCTGGGTGTCTGGTTA	intergenic							3457.15	1399.96	11.6362	10.2113	2881.73	5239.6	2250.13	1541.61	1303.93	1354.33	11.5266	12.0381	11.3438	10.2935	10.2092	10.1311
ASHGA5P044084	0.000726394	0.00820116	2.90289	up	noncoding	ENST00000515608	CTD-2541M15.1	GENCODE	2147	chr8	-	6475995	6506328		CACACACAACACACACACACATTTATGATAATGCTTGTTCTTAACCAAAAACTGAGATCT	natural antisense	NM_024596	MCPH1	microcephalin isoform 1	+	6264112	6501140	377.039	163.277	8.54593	7.00844	307.876	540.152	283.089	195.844	154.066	139.921	8.46073	8.71813	8.45893	7.22135	7.05931	6.74465
ASHGA5P030668	0.00581676	0.0273663	2.95403	up	noncoding	NR_045123	LOC253044	RefSeq	1735	chr15	+	77934105	77941581		CAATGTAAATGTGTTTTAATAGCCACACACACGGTCATATAAATGGGAATGTTCTAGGTA	intronic antisense	ENST00000559893	LINGO1	leucine rich repeat and Ig domain containing 1 [Source:HGNC Symbol;Acc:21205]	-	77908063	77988837	13.6281	7.16329	4.13613	2.57344	13.6451	20.469	6.77022	8.07468	7.96206	5.45313	4.36182	4.4758	3.57076	2.6046	2.66067	2.45505
ASHGA5P030668	0.00581676	0.0273663	2.95403	up	noncoding	NR_045123	LOC253044	RefSeq	1735	chr15	+	77934105	77941581		CAATGTAAATGTGTTTTAATAGCCACACACACGGTCATATAAATGGGAATGTTCTAGGTA	intronic antisense	ENST00000561030	LINGO1	leucine rich repeat and Ig domain containing 1 [Source:HGNC Symbol;Acc:21205]	-	77906011	77988490	13.6281	7.16329	4.13613	2.57344	13.6451	20.469	6.77022	8.07468	7.96206	5.45313	4.36182	4.4758	3.57076	2.6046	2.66067	2.45505
ASHGA5P030668	0.00581676	0.0273663	2.95403	up	noncoding	NR_045123	LOC253044	RefSeq	1735	chr15	+	77934105	77941581		CAATGTAAATGTGTTTTAATAGCCACACACACGGTCATATAAATGGGAATGTTCTAGGTA	intronic antisense	ENST00000561686	LINGO1	leucine rich repeat and Ig domain containing 1 [Source:HGNC Symbol;Acc:21205]	-	77907694	78079356	13.6281	7.16329	4.13613	2.57344	13.6451	20.469	6.77022	8.07468	7.96206	5.45313	4.36182	4.4758	3.57076	2.6046	2.66067	2.45505
ASHGA5P030668	0.00581676	0.0273663	2.95403	up	noncoding	NR_045123	LOC253044	RefSeq	1735	chr15	+	77934105	77941581		CAATGTAAATGTGTTTTAATAGCCACACACACGGTCATATAAATGGGAATGTTCTAGGTA	intronic antisense	ENST00000562933	LINGO1	leucine rich repeat and Ig domain containing 1 [Source:HGNC Symbol;Acc:21205]	-	77908195	78112674	13.6281	7.16329	4.13613	2.57344	13.6451	20.469	6.77022	8.07468	7.96206	5.45313	4.36182	4.4758	3.57076	2.6046	2.66067	2.45505
ASHGA5P030668	0.00581676	0.0273663	2.95403	up	noncoding	NR_045123	LOC253044	RefSeq	1735	chr15	+	77934105	77941581		CAATGTAAATGTGTTTTAATAGCCACACACACGGTCATATAAATGGGAATGTTCTAGGTA	intronic antisense	ENST00000563316	LINGO1	leucine rich repeat and Ig domain containing 1 [Source:HGNC Symbol;Acc:21205]	-	77908218	78113213	13.6281	7.16329	4.13613	2.57344	13.6451	20.469	6.77022	8.07468	7.96206	5.45313	4.36182	4.4758	3.57076	2.6046	2.66067	2.45505
ASHGA5P030668	0.00581676	0.0273663	2.95403	up	noncoding	NR_045123	LOC253044	RefSeq	1735	chr15	+	77934105	77941581		CAATGTAAATGTGTTTTAATAGCCACACACACGGTCATATAAATGGGAATGTTCTAGGTA	intronic antisense	ENST00000564472	LINGO1	leucine rich repeat and Ig domain containing 1 [Source:HGNC Symbol;Acc:21205]	-	77908123	78013093	13.6281	7.16329	4.13613	2.57344	13.6451	20.469	6.77022	8.07468	7.96206	5.45313	4.36182	4.4758	3.57076	2.6046	2.66067	2.45505
ASHGA5P030668	0.00581676	0.0273663	2.95403	up	noncoding	NR_045123	LOC253044	RefSeq	1735	chr15	+	77934105	77941581		CAATGTAAATGTGTTTTAATAGCCACACACACGGTCATATAAATGGGAATGTTCTAGGTA	intronic antisense	ENST00000566711	LINGO1	leucine rich repeat and Ig domain containing 1 [Source:HGNC Symbol;Acc:21205]	-	77908014	78111794	13.6281	7.16329	4.13613	2.57344	13.6451	20.469	6.77022	8.07468	7.96206	5.45313	4.36182	4.4758	3.57076	2.6046	2.66067	2.45505
ASHGA5P030668	0.00581676	0.0273663	2.95403	up	noncoding	NR_045123	LOC253044	RefSeq	1735	chr15	+	77934105	77941581		CAATGTAAATGTGTTTTAATAGCCACACACACGGTCATATAAATGGGAATGTTCTAGGTA	intronic antisense	ENST00000567726	LINGO1	leucine rich repeat and Ig domain containing 1 [Source:HGNC Symbol;Acc:21205]	-	77907854	77999849	13.6281	7.16329	4.13613	2.57344	13.6451	20.469	6.77022	8.07468	7.96206	5.45313	4.36182	4.4758	3.57076	2.6046	2.66067	2.45505
ASHGA5P030668	0.00581676	0.0273663	2.95403	up	noncoding	NR_045123	LOC253044	RefSeq	1735	chr15	+	77934105	77941581		CAATGTAAATGTGTTTTAATAGCCACACACACGGTCATATAAATGGGAATGTTCTAGGTA	intronic antisense	ENST00000570216	LINGO1	leucine rich repeat and Ig domain containing 1 [Source:HGNC Symbol;Acc:21205]	-	77908174	78113242	13.6281	7.16329	4.13613	2.57344	13.6451	20.469	6.77022	8.07468	7.96206	5.45313	4.36182	4.4758	3.57076	2.6046	2.66067	2.45505
ASHGA5P048785	0.00011781	0.00352041	3.53725	up	noncoding	NR_040066	LOXL1-AS1	RefSeq	2501	chr15	-	74209808	74220127	NR_040067	GTACCAGCCCAGGCGTGGGTCTCCGCCATGGGCCTGCGCCGCCTCGGGACCGGGGTCAGG	natural antisense	NM_005576	LOXL1	lysyl oxidase homolog 1 preproprotein	+	74218788	74244478	90.6759	40.8599	6.73725	4.91462	86.1177	102.421	83.4893	44.0042	40.9084	37.667	6.78474	6.54806	6.87894	4.947	5.02079	4.77607
ASHGA5P058061	0.00166636	0.0129143	3.19677	up	noncoding	TCONS_00025982	XLOC_012315	LincRNAs identified by Cabili et al	1742	chr17	+	75251162	75255415		TCTCAGTTGGCACCTGGCCAGGCACCACTCCAAACCGTCTCCTTGGAAAAGCAACTTCAG	intergenic							89.4403	44.0173	6.67316	4.99654	76.0614	123.814	68.4454	54.9652	44.0091	33.0776	6.63194	6.78092	6.60661	5.2867	5.1285	4.57441
ASHGA5P056527	0.00613791	0.0283823	6.16927	up	noncoding	TCONS_00005314	XLOC_002461	LincRNAs identified by Cabili et al	791	chr2	-	201979496	201980387		AAACTCTTGGATCAGAATCTCCCAGTCAGAGACCAGCATATCAGCATTTCTCATCTTGCC	intergenic							2097.47	341.015	10.7668	8.14167	2131.5	3408.8	752.12	366.691	318.927	337.426	11.1274	11.3854	9.7875	8.18194	8.16964	8.07342
ASHGA5P058540	6.51047e-05	0.00281178	33.24	up	noncoding	uc010bow.2	DNM1P46	UCSC_knowngene	699	chr15	-	100340121	100347132	ENST00000561463, ENST00000571780	AAGAAATAGACACTCCTGGAGGAGTCGGCAGAGCAGGCAGACCAAGGAGTTCATCTTCTC	bidirectional	ENST00000559714	CTD-2054N24.2	Uncharacterized protein [Source:UniProtKB/TrEMBL;Acc:H0YK47]	+	100347227	100417353	340.275	15.7091	8.46563	3.41078	285.095	368.492	367.238	13.3214	19.3743	14.4314	8.36121	8.21688	8.81879	3.08691	3.85179	3.29365
ASHGA5P058540	6.51047e-05	0.00281178	33.24	up	noncoding	uc010bow.2	DNM1P46	UCSC_knowngene	699	chr15	-	100340121	100347132	ENST00000561463, ENST00000571780	AAGAAATAGACACTCCTGGAGGAGTCGGCAGAGCAGGCAGACCAAGGAGTTCATCTTCTC	bidirectional	ENST00000560059	CTD-2054N24.2	Uncharacterized protein [Source:UniProtKB/TrEMBL;Acc:H0YK47]	+	100347263	100379270	340.275	15.7091	8.46563	3.41078	285.095	368.492	367.238	13.3214	19.3743	14.4314	8.36121	8.21688	8.81879	3.08691	3.85179	3.29365
ASHGA5P041789	0.00371686	0.0206787	3.2857	up	noncoding	ENST00000477984	LINC00336	GENCODE	2107	chr6	-	33553882	33561115		TCTTCAACTCCGACTCCAGGAAACCTGAGAGCCAGAGAGATGGCAAGGGACAGGGAGATG	natural antisense	ENST00000374458	GGNBP1	gametogenetin binding protein 1 (pseudogene) [Source:HGNC Symbol;Acc:19427]	+	33551514	33556803	15.7574	8.70393	4.41775	2.70155	10.92	17.1774	19.175	8.24039	6.94618	10.9252	4.06486	4.25067	4.93774	2.61558	2.59381	2.89527
ASHGA5P048550	9.293e-05	0.00321081	2.72491	up	noncoding	ENST00000412518	AL928742.12	GENCODE	357	chr14	-	106064223	106066376		GGTCCCCCAGAGCTGGACGTGTGCGTGGAGGAGGCCGAGGGCGAGGCGCCGTGGACGTGG	intergenic							261.157	128.659	8.10353	6.65732	223.436	313.924	246.11	134.126	123.702	128.15	8.03464	8.00262	8.27332	6.63966	6.72008	6.61221
ASHGA5P004477	0.0281046	0.075325	2.61535	up	noncoding	NR_047560	IKZF3	RefSeq	9644	chr17	-	37913967	38020441	NR_047559	GGGGACACTGGTACTGGTTGGGGATGGGTCGAGCTTTCCCATCTCGGCATAAGACTGCAA	exon sense-overlapping	NM_001257408	IKZF3	zinc finger protein Aiolos isoform 7	-	37913967	38020441	46.2081	27.0126	5.63199	4.24499	22.6613	86.3509	29.6121	33.578	20.831	26.6289	5.0377	6.33224	5.52604	4.53576	3.96508	4.23412
ASHGA5P004477	0.0281046	0.075325	2.61535	up	noncoding	NR_047560	IKZF3	RefSeq	9644	chr17	-	37913967	38020441	NR_047559	GGGGACACTGGTACTGGTTGGGGATGGGTCGAGCTTTCCCATCTCGGCATAAGACTGCAA	exon sense-overlapping	NM_001257409	IKZF3	zinc finger protein Aiolos isoform 8	-	37913967	38020441	46.2081	27.0126	5.63199	4.24499	22.6613	86.3509	29.6121	33.578	20.831	26.6289	5.0377	6.33224	5.52604	4.53576	3.96508	4.23412
ASHGA5P004477	0.0281046	0.075325	2.61535	up	noncoding	NR_047560	IKZF3	RefSeq	9644	chr17	-	37913967	38020441	NR_047559	GGGGACACTGGTACTGGTTGGGGATGGGTCGAGCTTTCCCATCTCGGCATAAGACTGCAA	exon sense-overlapping	NM_001257410	IKZF3	zinc finger protein Aiolos isoform 9	-	37913967	38020441	46.2081	27.0126	5.63199	4.24499	22.6613	86.3509	29.6121	33.578	20.831	26.6289	5.0377	6.33224	5.52604	4.53576	3.96508	4.23412
ASHGA5P004477	0.0281046	0.075325	2.61535	up	noncoding	NR_047560	IKZF3	RefSeq	9644	chr17	-	37913967	38020441	NR_047559	GGGGACACTGGTACTGGTTGGGGATGGGTCGAGCTTTCCCATCTCGGCATAAGACTGCAA	exon sense-overlapping	NM_001257411	IKZF3	zinc finger protein Aiolos isoform 10	-	37913967	38020441	46.2081	27.0126	5.63199	4.24499	22.6613	86.3509	29.6121	33.578	20.831	26.6289	5.0377	6.33224	5.52604	4.53576	3.96508	4.23412
ASHGA5P004477	0.0281046	0.075325	2.61535	up	noncoding	NR_047560	IKZF3	RefSeq	9644	chr17	-	37913967	38020441	NR_047559	GGGGACACTGGTACTGGTTGGGGATGGGTCGAGCTTTCCCATCTCGGCATAAGACTGCAA	exon sense-overlapping	NM_001257412	IKZF3	zinc finger protein Aiolos isoform 11	-	37913967	38020441	46.2081	27.0126	5.63199	4.24499	22.6613	86.3509	29.6121	33.578	20.831	26.6289	5.0377	6.33224	5.52604	4.53576	3.96508	4.23412
ASHGA5P004477	0.0281046	0.075325	2.61535	up	noncoding	NR_047560	IKZF3	RefSeq	9644	chr17	-	37913967	38020441	NR_047559	GGGGACACTGGTACTGGTTGGGGATGGGTCGAGCTTTCCCATCTCGGCATAAGACTGCAA	exon sense-overlapping	NM_001257413	IKZF3	zinc finger protein Aiolos isoform 12	-	37913967	38020441	46.2081	27.0126	5.63199	4.24499	22.6613	86.3509	29.6121	33.578	20.831	26.6289	5.0377	6.33224	5.52604	4.53576	3.96508	4.23412
ASHGA5P004477	0.0281046	0.075325	2.61535	up	noncoding	NR_047560	IKZF3	RefSeq	9644	chr17	-	37913967	38020441	NR_047559	GGGGACACTGGTACTGGTTGGGGATGGGTCGAGCTTTCCCATCTCGGCATAAGACTGCAA	exon sense-overlapping	NM_001257414	IKZF3	zinc finger protein Aiolos isoform 13	-	37913967	38020441	46.2081	27.0126	5.63199	4.24499	22.6613	86.3509	29.6121	33.578	20.831	26.6289	5.0377	6.33224	5.52604	4.53576	3.96508	4.23412
ASHGA5P004477	0.0281046	0.075325	2.61535	up	noncoding	NR_047560	IKZF3	RefSeq	9644	chr17	-	37913967	38020441	NR_047559	GGGGACACTGGTACTGGTTGGGGATGGGTCGAGCTTTCCCATCTCGGCATAAGACTGCAA	exon sense-overlapping	NM_012481	IKZF3	zinc finger protein Aiolos isoform 1	-	37913967	38020441	46.2081	27.0126	5.63199	4.24499	22.6613	86.3509	29.6121	33.578	20.831	26.6289	5.0377	6.33224	5.52604	4.53576	3.96508	4.23412
ASHGA5P004477	0.0281046	0.075325	2.61535	up	noncoding	NR_047560	IKZF3	RefSeq	9644	chr17	-	37913967	38020441	NR_047559	GGGGACACTGGTACTGGTTGGGGATGGGTCGAGCTTTCCCATCTCGGCATAAGACTGCAA	exon sense-overlapping	NM_183228	IKZF3	zinc finger protein Aiolos isoform 2	-	37913967	38020441	46.2081	27.0126	5.63199	4.24499	22.6613	86.3509	29.6121	33.578	20.831	26.6289	5.0377	6.33224	5.52604	4.53576	3.96508	4.23412
ASHGA5P004477	0.0281046	0.075325	2.61535	up	noncoding	NR_047560	IKZF3	RefSeq	9644	chr17	-	37913967	38020441	NR_047559	GGGGACACTGGTACTGGTTGGGGATGGGTCGAGCTTTCCCATCTCGGCATAAGACTGCAA	exon sense-overlapping	NM_183229	IKZF3	zinc finger protein Aiolos isoform 3	-	37913967	38020441	46.2081	27.0126	5.63199	4.24499	22.6613	86.3509	29.6121	33.578	20.831	26.6289	5.0377	6.33224	5.52604	4.53576	3.96508	4.23412
ASHGA5P004477	0.0281046	0.075325	2.61535	up	noncoding	NR_047560	IKZF3	RefSeq	9644	chr17	-	37913967	38020441	NR_047559	GGGGACACTGGTACTGGTTGGGGATGGGTCGAGCTTTCCCATCTCGGCATAAGACTGCAA	exon sense-overlapping	NM_183230	IKZF3	zinc finger protein Aiolos isoform 4	-	37913967	38020441	46.2081	27.0126	5.63199	4.24499	22.6613	86.3509	29.6121	33.578	20.831	26.6289	5.0377	6.33224	5.52604	4.53576	3.96508	4.23412
ASHGA5P004477	0.0281046	0.075325	2.61535	up	noncoding	NR_047560	IKZF3	RefSeq	9644	chr17	-	37913967	38020441	NR_047559	GGGGACACTGGTACTGGTTGGGGATGGGTCGAGCTTTCCCATCTCGGCATAAGACTGCAA	exon sense-overlapping	NM_183231	IKZF3	zinc finger protein Aiolos isoform 5	-	37913967	38020441	46.2081	27.0126	5.63199	4.24499	22.6613	86.3509	29.6121	33.578	20.831	26.6289	5.0377	6.33224	5.52604	4.53576	3.96508	4.23412
ASHGA5P004477	0.0281046	0.075325	2.61535	up	noncoding	NR_047560	IKZF3	RefSeq	9644	chr17	-	37913967	38020441	NR_047559	GGGGACACTGGTACTGGTTGGGGATGGGTCGAGCTTTCCCATCTCGGCATAAGACTGCAA	exon sense-overlapping	NM_183232	IKZF3	zinc finger protein Aiolos isoform 6	-	37913967	38020441	46.2081	27.0126	5.63199	4.24499	22.6613	86.3509	29.6121	33.578	20.831	26.6289	5.0377	6.33224	5.52604	4.53576	3.96508	4.23412
ASHGA5P044503	0.000425411	0.0063374	4.56419	up	noncoding	ENST00000522383	RP11-539E17.5	GENCODE	777	chr8	-	124193877	124195028		TGAAATCTATGAACTCTGAGGGGAGTGACCACGTGTTCTTTCCAGATCAGATCGTGATCT	natural antisense	NM_032899	FAM83A	protein FAM83A isoform a	+	124194751	124221207	27.7484	11.5432	5.16074	2.97038	31.1557	33.1764	18.9131	13.9139	11.4001	9.3157	5.45424	5.10963	4.91835	3.15632	3.03552	2.7193
ASHGA5P044503	0.000425411	0.0063374	4.56419	up	noncoding	ENST00000522383	RP11-539E17.5	GENCODE	777	chr8	-	124193877	124195028		TGAAATCTATGAACTCTGAGGGGAGTGACCACGTGTTCTTTCCAGATCAGATCGTGATCT	natural antisense	NM_207006	FAM83A	protein FAM83A isoform b	+	124194751	124222318	27.7484	11.5432	5.16074	2.97038	31.1557	33.1764	18.9131	13.9139	11.4001	9.3157	5.45424	5.10963	4.91835	3.15632	3.03552	2.7193
ASHGA5P037077	0.000438652	0.00645956	2.66156	up	noncoding	TCONS_00025234	XLOC_012507	LincRNAs identified by Cabili et al	521	chr17	-	47556109	47566925		AATTCTCCTAGTAACACCCTGTCTTCCACTGTCCCCAGTCCTCTGAGTGTGGCTGGGCAC	intergenic							2166.12	934.166	11.0592	9.64697	2203.21	2384.31	1910.84	1005.91	951.702	844.891	11.1728	10.8748	11.13	9.69524	9.78078	9.46488
ASHGA5P020000	0.0442294	0.103169	3.6151	up	noncoding	ENST00000506504	RP11-1079K10.4	GENCODE	963	chr17	+	47481442	47482559		GGAGGCCACACGTGGATAAAAAAGTAGATGGATGTGAGAAGAATGAAAGAGTTTCATTTG	natural antisense	NM_002634	PHB	prohibitin	-	47481419	47492242	18.5501	6.72775	4.33319	2.47915	5.08152	33.3648	17.204	10.1833	5	5	3.09643	5.11548	4.78764	2.7482	2.34646	2.34278
ASHGA5P057055	0.00108705	0.0101149	2.75078	up	noncoding	TCONS_00012345	XLOC_005899	LincRNAs identified by Cabili et al	335	chr6	-	159796863	159804337		AAGGAATGATGATCTTCTACTGGACAACAGAACCAGGCCTCCTGACTGCCCCTCCCTGCG	intergenic							5624.65	2369.08	12.4398	10.9799	6012.69	5448.8	5412.46	2369.12	2309.41	2428.71	12.5933	12.0997	12.6262	10.9199	11.0299	10.99
ASHGA5P046498	7.08113e-05	0.00289327	4.43376	up	noncoding	TCONS_00001430	XLOC_000746	LincRNAs identified by Cabili et al	2904	chr1	-	25589070	25593390		AGGAGTTAGATCACTTATCCGTCTCTCCCTGGCCCACCCTTCTCTGTCACATGGCTTCTT	intron sense-overlapping	ENST00000561867	C1orf63	chromosome 1 open reading frame 63 [Source:HGNC Symbol;Acc:25234]	-	25573166	25664591	6906.85	1826.29	12.7475	10.5989	7177.99	6961	6581.54	1936.38	1715.78	1826.71	12.8478	12.4978	12.8967	10.6203	10.6097	10.5668
ASHGA5P046498	7.08113e-05	0.00289327	4.43376	up	noncoding	TCONS_00001430	XLOC_000746	LincRNAs identified by Cabili et al	2904	chr1	-	25589070	25593390		AGGAGTTAGATCACTTATCCGTCTCTCCCTGGCCCACCCTTCTCTGTCACATGGCTTCTT	intron sense-overlapping	ENST00000568701	C1orf63	chromosome 1 open reading frame 63 [Source:HGNC Symbol;Acc:25234]	-	25573067	25594406	6906.85	1826.29	12.7475	10.5989	7177.99	6961	6581.54	1936.38	1715.78	1826.71	12.8478	12.4978	12.8967	10.6203	10.6097	10.5668
ASHGA5P046498	7.08113e-05	0.00289327	4.43376	up	noncoding	TCONS_00001430	XLOC_000746	LincRNAs identified by Cabili et al	2904	chr1	-	25589070	25593390		AGGAGTTAGATCACTTATCCGTCTCTCCCTGGCCCACCCTTCTCTGTCACATGGCTTCTT	intron sense-overlapping	ENST00000568996	C1orf63	chromosome 1 open reading frame 63 [Source:HGNC Symbol;Acc:25234]	-	25573185	25664704	6906.85	1826.29	12.7475	10.5989	7177.99	6961	6581.54	1936.38	1715.78	1826.71	12.8478	12.4978	12.8967	10.6203	10.6097	10.5668
ASHGA5P053841	9.07399e-07	0.000756825	9.08231	up	noncoding	NR_033374	LOC100289019	RefSeq	3842	chr9	-	130873449	130881013	ENST00000536815	ATCCCTGCATGCCTCCGTTCTCTGCATCCCTCCACCCCAGTATCCCTGCACCTCTTCATC	intergenic							51863.2	7315.5	15.809	12.6259	54709.7	56933.2	43946.7	7825.94	7389.51	6731.05	15.88	15.7983	15.7486	12.6669	12.6839	12.5269
ASHGA5P049854	1.06576e-06	0.000772872	3.9072	up	noncoding	NR_033357	PRCD	RefSeq	2081	chr17	+	74523667	74541458		CCCCAGTGCGGTCATCCCACCCAGAACTTCGCTCTGCCCCTGCCCATTCTAGGACAGCCG	exon sense-overlapping	NM_001077620	PRCD	progressive rod-cone degeneration protein precursor	+	74536120	74541458	6788.15	2037.83	12.7223	10.7561	6814.85	7601.24	5948.36	2138.47	1901.72	2073.31	12.7757	12.6433	12.7479	10.7617	10.7522	10.7544
ASHGA5P049854	1.06576e-06	0.000772872	3.9072	up	noncoding	NR_033357	PRCD	RefSeq	2081	chr17	+	74523667	74541458		CCCCAGTGCGGTCATCCCACCCAGAACTTCGCTCTGCCCCTGCCCATTCTAGGACAGCCG	natural antisense	NM_134268	CYGB	cytoglobin	-	74523429	74533987	6788.15	2037.83	12.7223	10.7561	6814.85	7601.24	5948.36	2138.47	1901.72	2073.31	12.7757	12.6433	12.7479	10.7617	10.7522	10.7544
ASHGA5P050784	0.000129271	0.00366839	14.3471	up	noncoding	NR_046452	IDH1-AS1	RefSeq	491	chr2	+	209119956	209120918		CAAAAACATGAAAATAAAGAGTATTTTATATTGTGATTTGTAGGACAATAGCATGCTTGT	intronic antisense	ENST00000417583	IDH1	isocitrate dehydrogenase 1 (NADP+), soluble [Source:HGNC Symbol;Acc:5382]	-	209113285	209120522	59.3397	5	6.18601	2.34333	70.4035	51.394	56.2215	5	5	5	6.53716	5.66932	6.35156	2.34074	2.34646	2.34278
ASHGA5P050784	0.000129271	0.00366839	14.3471	up	noncoding	NR_046452	IDH1-AS1	RefSeq	491	chr2	+	209119956	209120918		CAAAAACATGAAAATAAAGAGTATTTTATATTGTGATTTGTAGGACAATAGCATGCTTGT	intronic antisense	ENST00000451391	IDH1	isocitrate dehydrogenase 1 (NADP+), soluble [Source:HGNC Symbol;Acc:5382]	-	209113320	209130798	59.3397	5	6.18601	2.34333	70.4035	51.394	56.2215	5	5	5	6.53716	5.66932	6.35156	2.34074	2.34646	2.34278
ASHGA5P030759	0.0324417	0.0828137	2.01767	up	noncoding	ENST00000557804	AC068831.10	GENCODE	2159	chr15	+	91565850	91579841		CAAGTAGATCAGAATGTCCAACCTTACTAGAGAAGAAAAGTGGAATCATTGGCTATATTT	bidirectional	NM_018668	VPS33B	vacuolar protein sorting-associated protein 33B	-	91541773	91565833	162.959	115.12	7.48998	6.47729	192.108	149.472	147.297	107.461	137.956	99.9427	7.82878	7.02884	7.61232	6.29768	6.88694	6.24724
ASHGA5P040997	0.000822141	0.00880438	2.97845	up	noncoding	ENST00000513283	CTC-305H11.1	GENCODE	249	chr5	+	13175957	13179684		GCCAAATCCACATTTTTGTGACACTCCTGACAAACTGCTGCTGTATTAAAGAAATAAATT	intergenic							36.6551	22.7501	5.56241	3.98785	33.8422	43.1393	32.9837	27.0063	22.8677	18.3765	5.56612	5.45534	5.66578	4.18801	4.11015	3.66538
ASHGA5P031454	0.000378121	0.0059765	14.4677	up	noncoding	TCONS_00015989	XLOC_007368	LincRNAs identified by Cabili et al	218	chr9	+	47162726	47164029		TGAGGAAGGGAGTTGGGGCTGAAGTTGGAGGAGGAGGGCAGCTCTAAACCACCTATTCCT	intergenic							241.512	22.7426	7.83906	3.98429	180.912	422.272	121.353	27.6331	22.2443	18.3503	7.75796	8.40342	7.35579	4.22604	4.06425	3.66259
ASHGA5P026578	0.0154181	0.0507427	2.03557	up	noncoding	ENST00000567925	RP11-554A11.7	GENCODE	622	chr11	+	68870960	68876562		CATCTGTGAAGAGCCGGCTCCTGCTATTATTATTGTTAATCAGTATTAGTATTAGCATTA	intergenic							44.4577	37.9052	5.81205	4.78662	38.7409	48.4203	46.212	31.1488	44.1295	38.4371	5.74544	5.59817	6.09254	4.42026	5.1335	4.80609
ASHGA5P031924	9.65851e-06	0.00132897	2.19597	up	noncoding	ENST00000530512	RP11-77K12.4	GENCODE	573	chr16	+	75509793	75529305		CCGCGCGCCGGCCGGCAACCCTCGGCGCTGCCCGGTGCAGCCCGCCCGAGCGCACACAAT	natural antisense	NM_021615	CHST6	carbohydrate sulfotransferase 6 precursor	-	75507021	75528926	12.8618	12.021	4.15832	3.02346	11.2433	16.4559	10.8861	12.9965	10.8474	12.2189	4.10438	4.19512	4.17546	3.05232	2.96409	3.05396
ASHGA5P034540	6.65509e-05	0.00282546	13.3174	up	noncoding	ENST00000570714	CTD-2542C24.1	GENCODE	3048	chr19	+	20997934	21005077		GTCTCCAGAACCAACACTCTTGAATACAACAATAAAACCCCTCTTCAAACAAACAAAAAA	intergenic							1908.31	178.134	10.8838	7.14855	2019.09	1953.21	1752.64	184.409	194.523	155.471	11.0615	10.5704	11.0194	7.12572	7.41778	6.90217
ASHGA5P054738	0.000262116	0.00500205	5.66943	up	noncoding	uc009vjc.1	WASH7P	UCSC_knowngene	717	chr1	-	16857	17751	uc009vir.3, uc009vit.3, uc009viu.3, uc009viw.2, uc009vje.2	GCCTCTGTAGGTAGAAGAAGTATGTCTTCCTGGACCCCCTGGCTGGTGCTGTAACAAAGA	intergenic							2602.42	527.272	11.3065	8.80328	2800.88	2444.86	2561.53	548.744	526.285	506.786	11.493	10.9128	11.5137	8.78825	8.91341	8.70819
ASHGA5P020909	0.00103087	0.00987449	2.79051	up	noncoding	ENST00000521863	LINC00599	GENCODE	545	chr8	-	9760676	9761720		GGGAGCTGCGGAGAAAGGCCTCTCTCTCCGTGTTCACAGCGGACCTTGATTTAAATGTCC	intergenic							61.3976	36.7298	6.22482	4.74429	51.7104	70.0086	62.4738	34.571	33.3499	42.2685	6.11916	6.06558	6.48971	4.58011	4.69771	4.95506
ASHGA5P016494	0.00115635	0.0104608	4.63201	up	noncoding	ENST00000430913	HTR2A-AS1	GENCODE	428	chr13	+	47426286	47430434		CGGTAGCATGAAAACGAAGAGTGCTCTGGACAGTGGGTGGAGAAGATTCAAGTACATCTT	intronic antisense	NM_000621	HTR2A	5-hydroxytryptamine receptor 2A isoform 1	-	47405676	47471211	19.2653	6.57565	4.71089	2.49925	16.2583	18.5227	23.0149	5.77859	5	8.94837	4.60156	4.34883	5.18229	2.4598	2.34646	2.6915
ASHGA5P016494	0.00115635	0.0104608	4.63201	up	noncoding	ENST00000430913	HTR2A-AS1	GENCODE	428	chr13	+	47426286	47430434		CGGTAGCATGAAAACGAAGAGTGCTCTGGACAGTGGGTGGAGAAGATTCAAGTACATCTT	intronic antisense	NM_001165947	HTR2A	5-hydroxytryptamine receptor 2A isoform 2	-	47405676	47471211	19.2653	6.57565	4.71089	2.49925	16.2583	18.5227	23.0149	5.77859	5	8.94837	4.60156	4.34883	5.18229	2.4598	2.34646	2.6915
ASHGA5P023040	2.75466e-05	0.00190529	2.43271	up	noncoding	ENST00000568389	RP11-345M22.2	GENCODE	506	chr16	-	79787282	79804198		AAAGAGAGCTGAGATATATGCAGCCCCAGGTGCCTCCTTCTAATTCATCTTCACCATTGT	intergenic							662.056	321.719	9.33995	8.05739	632.585	835.608	517.976	336.686	311.302	317.168	9.42045	9.32634	9.27306	8.05667	8.12902	7.98648
ASHGA5P021333	0.000798742	0.00865218	4.82694	up	noncoding	NR_015383	LOC340357	RefSeq	772	chr8	-	12623570	12668910	ENST00000530228	ACATAGGTGATGAACGATGTGTACTTGAAAACAGTACACTCTTGCACAGCTGTCCCTGGA	intergenic							21.7515	7.57201	4.87799	2.60688	25.0305	19.302	20.922	6.98555	6.2195	9.51098	5.17101	4.40139	5.06156	2.53943	2.54631	2.73489
ASHGA5P018989	0.0009505	0.00948354	2.43163	up	noncoding	ENST00000463449	TIPARP-AS1	GENCODE	735	chr3	-	156389710	156390659		CTGCTCCAGAAAAGAGTAATAACAGGATGGAGATGGAGTTTCATGACAAAAATGAAGGTG	bidirectional	ENST00000486483	TIPARP	TCDD-inducible poly(ADP-ribose) polymerase [Source:HGNC Symbol;Acc:23696]	+	156391023	156422928	158.577	93.764	7.46313	6.1812	158.641	176.303	140.787	87.095	91.6856	102.511	7.59719	7.23919	7.55301	5.99307	6.26463	6.2859
ASHGA5P000232	0.000338262	0.00567438	2.42229	up	noncoding	chr12:60293850-60330425+	chr12:60293850-60330425	LincRNAs identified by Khalil et al	36575	chr12	+	62007583	62044158		TACTTTATCTTCCCTCTTTATAAAACAGCCCCATCCCCTGAAGAGCTTGAATGAAAACTC	intergenic							1569.17	749.543	10.6017	9.32528	1553.54	1745.98	1408	760.274	746.245	742.111	10.6997	10.4056	10.6997	9.27585	9.43346	9.26652
ASHGA5P027254	0.000757446	0.00843298	2.91905	up	noncoding	ENST00000550468	RP11-161H23.5	GENCODE	674	chr12	-	49658938	49667089		CAATTTACGGCAATAGACATTTACAGAACAAAAATAAGACAGTTCCAAGACAAAGGAGTG	natural antisense	NM_032704	TUBA1C	tubulin alpha-1C chain	+	49658864	49667113	184.966	89.473	7.64719	6.1017	197.345	206.748	150.805	101.696	88.3195	78.4031	7.86667	7.43286	7.64205	6.21715	6.20698	5.88096
ASHGA5P035692	0.00041472	0.00624903	2.82358	up	noncoding	ENST00000444416	AC073479.1	GENCODE	2695	chr2	+	6122109	6125029		CTTTCCTTCCCCCCATCCCTTGAACAAACATGATTTTTAAATTCCCCTCATCATTTTTAG	intergenic							14606.4	5915.25	13.8168	12.3192	13614.9	19337.4	10866.8	6302.33	5893.56	5549.85	13.7663	14.0672	13.6169	12.3554	12.364	12.2384
ASHGA5P034965	7.47627e-05	0.00296732	11.6823	up	noncoding	TCONS_00004726	XLOC_001406	LincRNAs identified by Cabili et al	2136	chr2	+	27938797	27962232		GTATGCTACTGTTTAAGAAAGACAAGTATTCATCTGTGTGTGCGTGTGTTTGCTTATATA	intergenic							3430.02	342.88	11.6948	8.14853	2624.35	4020.05	3645.65	376.805	346.397	305.436	11.4041	11.6509	12.0293	8.22131	8.28997	7.93431
ASHGA5P039552	1.84095e-05	0.00170548	48.7493	up	noncoding	ENST00000505632	RP11-148B6.2	GENCODE	740	chr4	-	113614202	113627966		TTCATGAGGCCATAATGCATTGTTTTGTGCTCAAATTTTGCATTGTATTTAAAGCATTCA	intergenic							5648.18	145.183	12.4468	6.83949	6078.16	5506.02	5360.37	147.525	162.4	125.625	12.6144	12.1115	12.6144	6.79006	7.14716	6.58127
ASHGA5P046867	5.11049e-05	0.00251099	5.57505	up	noncoding	ENST00000430284	RP11-508M1.7	GENCODE	709	chr10	-	48988120	48998766	ENST00000453853, NR_046091	ATGGCTTAATTGGCTAGCAAGCGAATTTTCCCAGATGAAAGCAATGTTGGGTTAGGGGAC	intergenic							367.124	88.4648	8.55945	6.08046	349.622	446.182	305.568	81.6635	78.8845	104.846	8.63363	8.477	8.56771	5.88925	6.03209	6.32004
ASHGA5P018331	9.0552e-05	0.00316755	6.4821	up	noncoding	ENST00000452184	RP11-262H14.1	GENCODE	457	chr9	+	66457899	66470542		ATGAGAAGTTTAAAAAATAAAATTTAAAGAGAGAAAAGGCTTTGGTATCAGGATGATTCT	intergenic							26.7635	5.02921	5.06677	2.37031	19.7625	41.3461	19.1819	5.08762	5	5	4.86334	5.39833	4.93865	2.42168	2.34646	2.34278
ASHGA5P027913	0.000603698	0.00752372	2.08423	up	noncoding	TCONS_00012046	XLOC_005578	LincRNAs identified by Cabili et al	228	chr6	-	2272910	2273285		TGGTTCATTCTTGCATAAGATCTGCACCTGGTCCTTGGGCTCCATCCATGCATGTTTTTA	intergenic							543.662	314.283	9.07935	8.01983	483.481	655.467	492.038	334.527	317.261	291.062	9.05749	8.98886	9.1917	8.04639	8.16074	7.85237
ASHGA5P030372	0.00200665	0.0144335	2.15817	up	noncoding	TCONS_00008682	XLOC_004198	LincRNAs identified by Cabili et al	1224	chr4	-	184254594	184271991		TGTGGCTGCCACTGGCCCCCAGCCTGGGAATCTGCTGTGGCCTCTGGGCCTCGCACATGC	intergenic							2784.88	1474.76	11.3971	10.2872	3051.42	2918.87	2384.37	1518.27	1538.69	1367.31	11.6053	11.1699	11.4159	10.268	10.4518	10.142
ASHGA5P026432	0.0206872	0.0614223	2.24314	up	noncoding	H29236		LincRNAs identified by Khalil et al	525	chr1	+	59222540	59223054		TGGATGGGCTGAGGTGATGAAAGAGGTAACTTTGATATGAACTATGCCTCAATAAGTGGG	intergenic							16.6388	13.8462	4.38811	3.2226	9.80491	27.706	12.4055	12.6497	12.1675	16.7215	3.92384	4.87754	4.36296	3.01891	3.13106	3.51782
ASHGA5P055612	6.65692e-05	0.00282546	3.02989	up	noncoding	TCONS_00003611	XLOC_001406	LincRNAs identified by Cabili et al	1425	chr2	+	27938768	27977766		CTGGGCTGGTCCTCCCGGATCCACTCCTCTCCCACACTCCCTCACCTCCCCCCTCCCTCC	intergenic							47449	19636.4	15.6801	14.0808	49205.3	52802.9	40338.9	20893	17602.1	20414.1	15.7165	15.6829	15.641	14.1459	13.9026	14.194
ASHGA5P048056	0.000601587	0.00750802	3.26448	up	noncoding	ENST00000526225	CTD-2210P24.3	GENCODE	166	chr11	-	45772656	45773124		CTCTTCCTCCACCTCTGCCACAGGGCTCCAGCTTCCCTCTGGGGGCACCACTGTTCTTAG	intergenic							3540.79	1209.36	11.7122	10.0054	3360.45	4789.98	2471.95	1254.75	1294.88	1078.46	11.751	11.9165	11.4691	10.0126	10.2	9.8035
ASHGA5P015887	0.00760923	0.032542	3.59778	up	noncoding	ENST00000424436	RP4-742C19.12	GENCODE	592	chr22	+	39487638	39488860		AAGTTGCAGGAGGCCAGGAGCCAGGAGGGGAAACCACTCAGTTTGCAAAACGTCGCTTCC	intergenic							41.3022	20.0031	5.60014	3.75304	25.8949	67.7163	30.2952	26.4624	20.0446	13.5025	5.21796	6.02521	5.55726	4.15791	3.90534	3.19586
ASHGA5P046079	0.0282992	0.0756824	2.13138	up	noncoding	uc011mfm.2	BC012753	UCSC_knowngene	1339	chrUn_gl000214	+	30380	68054	ENST00000432361, ENST00000436680	GAAACACAGTTCTGCTGCATAGTGAAAAAAGGCCAATTTAGATTCTTTTTCATAGAGAGA	intergenic							23.4335	21.6842	4.97251	3.88072	19.9076	27.3475	23.0455	20.3773	28.8259	15.8496	4.87193	4.86092	5.18468	3.74305	4.46793	3.4312
ASHGA5P028234	2.03855e-05	0.00170952	42.3924	up	noncoding	TCONS_00009369	XLOC_004312	LincRNAs identified by Cabili et al	548	chr5	+	21107539	21154785		ATTGTTAAGGCAATTATCCGTGTTGAAGAGAAACACGTCGCTGCTGCTTGCTTGATGTGG	intergenic							741.007	24.6089	9.51592	4.11019	724.961	789.181	708.877	28.5808	26.0688	19.1772	9.60596	9.24973	9.69209	4.28229	4.31633	3.73195
ASHGA5P028126	0.0455434	0.105373	4.14514	up	noncoding	ENST00000544710	RP11-611O2.1	GENCODE	374	chr12	+	69221897	69222333		GTGATGTATGGAGATAAAGTTCTGAAAGAAGAATAGAAAGCTTTTTAAAAATAGTATTCT	intron sense-overlapping	NM_002392	MDM2	E3 ubiquitin-protein ligase Mdm2 isoform MDM2	+	69201970	69239320	66.3321	23.8108	5.95811	3.90668	28.0482	139.319	31.6295	27.8131	10.276	33.3433	5.32207	6.93903	5.61322	4.23552	2.89934	4.58519
ASHGA5P053281	0.0178318	0.0556543	2.1113	up	noncoding	ENST00000450063	AC006159.3	GENCODE	469	chr7	-	116211013	116213798		TATTATTCAAGTAAGAAAAATATGTATATCAAACATCCATGGTAGTCCTTGCTAAAATTT	intergenic							149.356	102.537	7.38647	6.30834	166.894	134.82	146.353	108.921	109.118	89.572	7.65951	6.89438	7.60552	6.31856	6.5249	6.08157
ASHGA5P038026	0.000942699	0.0094481	2.93877	up	noncoding	ENST00000431327	EFCAB6-AS1	GENCODE	1997	chr22	+	43912133	43932485		ATGTAAAATGTTGAATAAACAAGATGTAACTGGGCCGGGTGTGTTGGGTCACACCTGATC	natural antisense	NM_022785	EFCAB6	EF-hand calcium-binding domain-containing protein 6 isoform a	-	43924623	44208217	135.187	67.2476	7.20127	5.64605	120.845	191.775	92.9393	68.1	52.8271	80.8157	7.24767	7.33929	7.01683	5.60816	5.40768	5.92233
ASHGA5P038026	0.000942699	0.0094481	2.93877	up	noncoding	ENST00000431327	EFCAB6-AS1	GENCODE	1997	chr22	+	43912133	43932485		ATGTAAAATGTTGAATAAACAAGATGTAACTGGGCCGGGTGTGTTGGGTCACACCTGATC	natural antisense	NM_198856	EFCAB6	EF-hand calcium-binding domain-containing protein 6 isoform b	-	43924623	44208217	135.187	67.2476	7.20127	5.64605	120.845	191.775	92.9393	68.1	52.8271	80.8157	7.24767	7.33929	7.01683	5.60816	5.40768	5.92233
ASHGA5P025920	0.0062018	0.028577	2.17432	up	noncoding	NR_046340	C9orf173	RefSeq	964	chr9	+	140145712	140147935		AGAGCAAAAGGCACCTGGCAAGAGATGCCCTGGCCCCAACACCTACAATATCCTTCCTGG	exon sense-overlapping	NM_001004353	C9orf173	uncharacterized protein C9orf173 isoform c	+	140145712	140147935	336.051	200.505	8.4391	7.31853	353.889	388.653	265.611	234.571	205.882	161.062	8.65381	8.29041	8.37308	7.49046	7.51017	6.95498
ASHGA5P025920	0.0062018	0.028577	2.17432	up	noncoding	NR_046340	C9orf173	RefSeq	964	chr9	+	140145712	140147935		AGAGCAAAAGGCACCTGGCAAGAGATGCCCTGGCCCCAACACCTACAATATCCTTCCTGG	exon sense-overlapping	NM_001256699	C9orf173	uncharacterized protein C9orf173 isoform a	+	140145712	140147935	336.051	200.505	8.4391	7.31853	353.889	388.653	265.611	234.571	205.882	161.062	8.65381	8.29041	8.37308	7.49046	7.51017	6.95498
ASHGA5P025920	0.0062018	0.028577	2.17432	up	noncoding	NR_046340	C9orf173	RefSeq	964	chr9	+	140145712	140147935		AGAGCAAAAGGCACCTGGCAAGAGATGCCCTGGCCCCAACACCTACAATATCCTTCCTGG	exon sense-overlapping	NM_001256700	C9orf173	uncharacterized protein C9orf173 isoform b	+	140145712	140147935	336.051	200.505	8.4391	7.31853	353.889	388.653	265.611	234.571	205.882	161.062	8.65381	8.29041	8.37308	7.49046	7.51017	6.95498
ASHGA5P025920	0.0062018	0.028577	2.17432	up	noncoding	NR_046340	C9orf173	RefSeq	964	chr9	+	140145712	140147935		AGAGCAAAAGGCACCTGGCAAGAGATGCCCTGGCCCCAACACCTACAATATCCTTCCTGG	exon sense-overlapping	NM_001256701	C9orf173	uncharacterized protein C9orf173 isoform d	+	140145712	140147935	336.051	200.505	8.4391	7.31853	353.889	388.653	265.611	234.571	205.882	161.062	8.65381	8.29041	8.37308	7.49046	7.51017	6.95498
ASHGA5P023055	0.00319596	0.018856	2.40242	up	noncoding	ENST00000568730	RP11-56L13.1	GENCODE	425	chr16	-	32274228	32275108	ENST00000565847, ENST00000570084	CAGTAAACAGGTACTTTGTATTCTCAAATTGCATCTGCTTACCCTGGCCCCCTCAAAATG	intergenic							813.76	403.115	9.65166	8.38717	857.288	813.787	770.206	436.482	401.622	371.241	9.84461	9.2899	9.82046	8.44211	8.49867	8.22072
ASHGA5P055690	0.0208183	0.061635	2.98712	up	noncoding	NR_034132	LOC400084	RefSeq	2092	chr12	-	126443233	126467920		GGGAAATGGGGTAAGTTACACAATCGATACAGCTCCGTCATCGTGGTTTAATTACTTTTC	intergenic							423.602	184.914	8.74891	7.17015	485.682	358.175	426.948	193.888	233.319	127.536	9.06432	8.17467	9.00773	7.20823	7.69583	6.60639
ASHGA5P033514	0.00451816	0.0234735	4.88232	up	noncoding	uc002kol.1	AX747048	UCSC_knowngene	1961	chr18	-	10244400	10247598		ACTACATCGCTCCTGTTAAACAGCCAAAATGAAGCAGAAAAATAGCTCCACCTCACTTCT	intergenic							287.112	80.719	8.22205	5.93449	352.776	228.921	279.639	88.5939	91.9273	61.6357	8.65023	7.57327	8.44266	6.01866	6.2693	5.5155
ASHGA5P040208	0.0253623	0.0702756	2.33897	up	noncoding	uc003ipy.1	AK094909	UCSC_knowngene	2055	chr4	+	159191529	159198693		ATGTTTTGATGGATATACAGCATTTCAATATATCAAAGTCATAATTGCCCTAATCCTTTC	intergenic							26.4188	21.9056	5.11471	3.88884	33.5183	25.0223	20.7158	20.9417	15.4045	29.3707	5.55197	4.7464	5.04576	3.78789	3.49331	4.38531
ASHGA5P028015	0.00092703	0.00935773	2.67874	up	noncoding	ENST00000551089	RP11-641A6.2	GENCODE	563	chr12	+	52995250	53007389		TTGATCTAAGTGGGTGCCAAGGACAGAGCTGTGTCTTCTCCTCCCCTTTGGCTTCCCCCA	natural antisense	NM_001146225	KRT72	keratin, type II cytoskeletal 72 isoform 1	-	52979372	52995322	3346.29	1439.64	11.6743	10.2528	3410.59	3378.35	3249.93	1605.61	1311.79	1401.51	11.7786	11.3722	11.8722	10.3525	10.2249	10.1809
ASHGA5P028015	0.00092703	0.00935773	2.67874	up	noncoding	ENST00000551089	RP11-641A6.2	GENCODE	563	chr12	+	52995250	53007389		TTGATCTAAGTGGGTGCCAAGGACAGAGCTGTGTCTTCTCCTCCCCTTTGGCTTCCCCCA	natural antisense	NM_001146226	KRT72	keratin, type II cytoskeletal 72 isoform 2	-	52979372	52995322	3346.29	1439.64	11.6743	10.2528	3410.59	3378.35	3249.93	1605.61	1311.79	1401.51	11.7786	11.3722	11.8722	10.3525	10.2249	10.1809
ASHGA5P028015	0.00092703	0.00935773	2.67874	up	noncoding	ENST00000551089	RP11-641A6.2	GENCODE	563	chr12	+	52995250	53007389		TTGATCTAAGTGGGTGCCAAGGACAGAGCTGTGTCTTCTCCTCCCCTTTGGCTTCCCCCA	natural antisense	NM_080747	KRT72	keratin, type II cytoskeletal 72 isoform 1	-	52979372	52995322	3346.29	1439.64	11.6743	10.2528	3410.59	3378.35	3249.93	1605.61	1311.79	1401.51	11.7786	11.3722	11.8722	10.3525	10.2249	10.1809
ASHGA5P028015	0.00092703	0.00935773	2.67874	up	noncoding	ENST00000551089	RP11-641A6.2	GENCODE	563	chr12	+	52995250	53007389		TTGATCTAAGTGGGTGCCAAGGACAGAGCTGTGTCTTCTCCTCCCCTTTGGCTTCCCCCA	natural antisense	NM_175068	KRT73	keratin, type II cytoskeletal 73	-	53001353	53012343	3346.29	1439.64	11.6743	10.2528	3410.59	3378.35	3249.93	1605.61	1311.79	1401.51	11.7786	11.3722	11.8722	10.3525	10.2249	10.1809
ASHGA5P021749	0.000865093	0.00905775	2.2419	up	noncoding	ENST00000539808	RP11-152F13.3	GENCODE	918	chr15	-	82765560	82798244		CTGGCAGCATGACTCAGACTGCATGACAGTGGCCGGACACCCCCTGGGATGGCTCAAAGG	intergenic							26.8455	22.7285	5.15898	3.99426	26.5232	29.0065	25.0068	25.6124	19.7469	22.8261	5.25083	4.93514	5.29096	4.10744	3.88013	3.9952
ASHGA5P037376	7.45592e-05	0.00296732	6.88502	up	noncoding	TCONS_00024467	XLOC_011789	LincRNAs identified by Cabili et al	3301	chr16	+	74299393	74302955		GAAAATGGCTCCTGGTGTGCAGAACTCCATGATAAATGTGCCCCCTCTAGTTCTTTATTG	intergenic							24834	4398.31	14.6661	11.8826	27268.5	23573.8	23659.7	4444.6	4778.61	3971.73	14.8234	14.3845	14.7904	11.8477	12.0492	11.751
ASHGA5P030904	0.0185751	0.0572126	2.01192	up	noncoding	ENST00000576943	RP11-473M20.15	GENCODE	650	chr16	-	3160512	3162490		TTTTGTGGAAAGATTGTGTTATTTGAAATTTCAAAGCGAGCACTGCAGTTGTCCTCACAG	bidirectional	NM_001042428	ZNF205	zinc finger protein 205	+	3162562	3170518	13.3035	13.561	4.21301	3.20444	10.9257	13.0019	15.983	14.7921	14.101	11.7897	4.0661	3.88791	4.68502	3.25159	3.35705	3.00467
ASHGA5P030904	0.0185751	0.0572126	2.01192	up	noncoding	ENST00000576943	RP11-473M20.15	GENCODE	650	chr16	-	3160512	3162490		TTTTGTGGAAAGATTGTGTTATTTGAAATTTCAAAGCGAGCACTGCAGTTGTCCTCACAG	bidirectional	NM_003456	ZNF205	zinc finger protein 205	+	3162562	3170518	13.3035	13.561	4.21301	3.20444	10.9257	13.0019	15.983	14.7921	14.101	11.7897	4.0661	3.88791	4.68502	3.25159	3.35705	3.00467
ASHGA5P031287	0.000443319	0.0064768	7.45922	up	noncoding	ENST00000568137	AC009120.4	GENCODE	966	chr16	-	74226290	74249420		CACCTCGCTATAGGGACAAGAAAGGAAGAGAGAGAGAGAACATTTCTGAAGTAATAGTGA	intergenic							37.3496	7.18211	5.44436	2.54534	28.9893	62.242	20.8176	9.22141	7.32493	5	5.36316	5.9169	5.05303	2.6752	2.61803	2.34278
ASHGA5P045920	0.00104173	0.00988842	2.7353	up	noncoding	ENST00000442008	RP11-116G8.5	GENCODE	595	chr10	-	5566938	5567705		AAACAGGGAGAAGGCCTCCTTGAATTCTGTGACCTGCTCCTCAGTCAGCTGGTCGGCCAT	natural antisense	NM_005185	CALML3	calmodulin-like protein 3	+	5566923	5568225	187.996	96.6783	7.67076	6.21906	189.914	215.056	159.019	99.3905	105.771	84.8738	7.81576	7.482	7.71451	6.18626	6.47427	5.99665
ASHGA5P019368	0.000456093	0.00657561	3.47588	up	noncoding	ENST00000480208	AC159540.2	GENCODE	592	chr2	+	98086677	98100408	TCONS_00004852	GCTACATCAGTCCAATGTGAATAACAAAATGAAGAATATCAGGATGATTCGAGACCAGGA	intergenic							89.275	40.7072	6.69558	4.8982	92.6204	107.012	68.1929	46.6071	41.5742	33.9403	6.8844	6.6007	6.60165	5.03305	5.04676	4.6148
ASHGA5P022597	0.00115335	0.0104431	3.73987	up	noncoding	ENST00000559366	RP11-752G15.6	GENCODE	674	chr15	+	83419335	83425958		GAACATGGCCTTGAGATGTTTTCTTCTAAATAAATGAGAAAGATGTTTCAACAAAGGCTC	natural antisense	ENST00000334574	FSD2	fibronectin type III and SPRY domain containing 2 [Source:HGNC Symbol;Acc:18024]	-	83424113	83474821	1278.08	410.389	10.3184	8.41546	1380.83	1304	1149.43	369.916	460.909	400.344	10.5454	9.98438	10.4255	8.19405	8.71012	8.34221
ASHGA5P048882	0.0152922	0.0504718	2.36109	up	noncoding	TCONS_00025082	XLOC_012044	LincRNAs identified by Cabili et al	840	chr16	-	86254428	86260403		CCCATTGCAGGTGCAGGTGGAGACGGAACCCTAGACACTGCTCATCCCAATCAGGCCCTT	intergenic							22.0669	18.3998	4.87212	3.63267	15.6945	25.2974	25.2088	17.4543	14.1819	23.5631	4.55085	4.76313	5.30238	3.49176	3.36551	4.04073
ASHGA5P028972	0.00517579	0.0254868	3.12767	up	noncoding	uc001vvq.1	BC016035	UCSC_knowngene	1169	chr14	-	19856360	19925333	uc021rnj.1	CATATATGCAACTATGACAGGAGGTACTAAAAGCCTTAGATAAGCATGGTGTATCTTTTT	intergenic							521.01	209.836	9.03209	7.38701	567.299	518.062	477.668	203.816	254.508	171.183	9.27468	8.66746	9.15414	7.28497	7.82912	7.04692
ASHGA5P037425	4.14126e-05	0.00233644	27.5186	up	noncoding	ENST00000433344	AJ006995.3	GENCODE	572	chr21	+	29327239	29357614		GGGAACAATTTATCTATGTTAAAAAGATGTGTGTGTGTGAATGGATGTATATACGTGTGC	intergenic							12699.1	536.165	13.6075	8.82512	8878.87	16495.6	12722.9	589.11	529.916	489.47	13.1462	13.8171	13.8591	8.89455	8.92532	8.65551
ASHGA5P043672	0.00766481	0.0326987	2.69331	up	noncoding	ENST00000458615	RP11-436F9.1	GENCODE	679	chr7	+	54398389	54417542		GAACAGCACTCCAGGACAGTAAATCATGAAATGGGAATAAAGCCTGTAATTTTAATTAAC	intergenic							29.508	19.7364	5.17581	3.74643	25.6231	45.5375	17.3634	26.1367	15.6526	17.4199	5.20347	5.52416	4.79981	4.13905	3.51798	3.58226
ASHGA5P036066	0.000489818	0.0067797	2.59513	up	noncoding	ENST00000562665	RP11-1223D19.1	GENCODE	814	chr2	+	110992311	111023767	ENST00000563035, ENST00000568756, NR_027145	CAAAATGAGAAGAAAAAGTCCCTTTCCCTTCATGCCTCTACTTCCTGCTGTATTCTCAAA	intergenic							1999.1	890.436	10.9534	9.57755	1943.94	2203.73	1849.64	918.848	922.438	830.021	11.0148	10.756	11.0893	9.5563	9.73635	9.43999
ASHGA5P048066	3.35446e-05	0.00207744	5.68239	up	noncoding	ENST00000532022	RP11-390K5.3	GENCODE	332	chr11	-	47144654	47152352		TTGGAAGCTTTTACAATAAAGATTTAATTCATCTGATGAAATGAGTTTAAGATGAAAACA	intronic antisense	NM_001003676	C11orf49	UPF0705 protein C11orf49 isoform 1	+	46958250	47183798	22.6324	5.72825	4.92028	2.41378	24.0298	25.7669	18.1006	7.18475	5	5	5.11777	4.78529	4.85777	2.5521	2.34646	2.34278
ASHGA5P048066	3.35446e-05	0.00207744	5.68239	up	noncoding	ENST00000532022	RP11-390K5.3	GENCODE	332	chr11	-	47144654	47152352		TTGGAAGCTTTTACAATAAAGATTTAATTCATCTGATGAAATGAGTTTAAGATGAAAACA	intronic antisense	NM_001003677	C11orf49	UPF0705 protein C11orf49 isoform 2	+	46958250	47183798	22.6324	5.72825	4.92028	2.41378	24.0298	25.7669	18.1006	7.18475	5	5	5.11777	4.78529	4.85777	2.5521	2.34646	2.34278
ASHGA5P048066	3.35446e-05	0.00207744	5.68239	up	noncoding	ENST00000532022	RP11-390K5.3	GENCODE	332	chr11	-	47144654	47152352		TTGGAAGCTTTTACAATAAAGATTTAATTCATCTGATGAAATGAGTTTAAGATGAAAACA	intronic antisense	NM_001003678	C11orf49	UPF0705 protein C11orf49 isoform 4	+	46958250	47185931	22.6324	5.72825	4.92028	2.41378	24.0298	25.7669	18.1006	7.18475	5	5	5.11777	4.78529	4.85777	2.5521	2.34646	2.34278
ASHGA5P048066	3.35446e-05	0.00207744	5.68239	up	noncoding	ENST00000532022	RP11-390K5.3	GENCODE	332	chr11	-	47144654	47152352		TTGGAAGCTTTTACAATAAAGATTTAATTCATCTGATGAAATGAGTTTAAGATGAAAACA	intronic antisense	NM_024113	C11orf49	UPF0705 protein C11orf49 isoform 3	+	46958250	47183798	22.6324	5.72825	4.92028	2.41378	24.0298	25.7669	18.1006	7.18475	5	5	5.11777	4.78529	4.85777	2.5521	2.34646	2.34278
ASHGA5P023234	3.00611e-05	0.00199806	33.8254	up	noncoding	ENST00000575193	ANKRD36BP2	pseudogene	1245	chr2	+	89082228	89104917		ATATTACTCATTGATCAACATGAAATGAAGTGCAAAGGAAAGATTTTGTCAACTAAAAAA								2214.86	85.3804	11.088	6.00797	2081.2	2608.85	1954.52	100.912	92.8153	62.4134	11.1005	11.0025	11.161	6.20499	6.2824	5.53652
ASHGA5P016319	0.00174857	0.0132498	2.58033	up	noncoding	ENST00000429250	RP11-90J7.3	GENCODE	607	chr10	+	80008496	80310446	uc010qlp.2	GCTCTCCAAGAAAAAGTTTGCCAACTCCTGCTCTAGATTGATGGTTACAAAGTCTGACAG	intergenic							389.63	194.35	8.65401	7.28646	362.825	408.293	397.771	209.477	193.189	180.384	8.68812	8.35477	8.91916	7.32462	7.40856	7.12619
ASHGA5P052231	0.000490215	0.0067797	2.1484	up	noncoding	ENST00000508913	AC025171.1	GENCODE	2311	chr5	+	43042234	43045370		GCTTTTCCAGGTCACCCCTCGCTGCCAGGCTCTCTTCCCGGTCCAGAGCCCACAGGATCC	natural antisense	ENST00000314890	ANXA2R	annexin A2 receptor [Source:HGNC Symbol;Acc:33463]	-	43039334	43043272	1362.03	742.371	10.412	9.30869	1335.78	1493.58	1256.73	785.845	676.925	764.342	10.4944	10.2016	10.5399	9.32186	9.28844	9.31579
ASHGA5P027676	0.00148332	0.0120824	2.98986	up	noncoding	ENST00000545853	RP11-407A16.3	GENCODE	456	chr12	-	127094579	127174806		GAGAAGAAAAAGGCCTCCTGCCTCCTCTTCTTTCACCAGACACTGTGGGCCCACAATTCC	intergenic							2286.17	877.936	11.1328	9.55269	2374.91	2270.28	2213.32	981.903	885.199	766.705	11.2739	10.7995	11.3249	9.65582	9.68091	9.32133
ASHGA5P035314	0.000633473	0.00770887	2.59661	up	noncoding	ENST00000436488	AC140481.8	GENCODE	525	chr2	-	131507267	131513408		AATGTCCTTAGTTAAGCTCTCACCCTGCATGACTGTTTTCCTCAGAAGAAGGCACTAGTG	intronic antisense	NM_152698	FAM123C	APC membrane recruitment protein 3	+	131513076	131525707	1135.12	510.924	10.1312	8.7546	1235.89	1244.45	925.026	517.59	488.199	526.982	10.3912	9.9152	10.0873	8.69975	8.79368	8.77036
ASHGA5P035314	0.000633473	0.00770887	2.59661	up	noncoding	ENST00000436488	AC140481.8	GENCODE	525	chr2	-	131507267	131513408		AATGTCCTTAGTTAAGCTCTCACCCTGCATGACTGTTTTCCTCAGAAGAAGGCACTAGTG	natural antisense	NM_001105193	FAM123C	APC membrane recruitment protein 3	+	131513223	131525707	1135.12	510.924	10.1312	8.7546	1235.89	1244.45	925.026	517.59	488.199	526.982	10.3912	9.9152	10.0873	8.69975	8.79368	8.77036
ASHGA5P022238	1.33376e-06	0.000795975	9.57008	up	noncoding	ENST00000553214	RP11-146E13.2	pseudogene	674	chr14	+	19718325	19742798	ENST00000548443	TTTCAACCACGTAAGTTTCAGAGTACCTTCAAGTTTAAATCTAAGAGTGATATTCATTTG								39.9267	5.0924	5.63552	2.37699	34.4048	54.9817	30.3935	5	5	5.2772	5.58443	5.75972	5.56243	2.34074	2.34646	2.44378
ASHGA5P054139	0.000124936	0.00358719	8.86356	up	noncoding	ENST00000438602	RP11-308D16.4	GENCODE	582	chrX	+	136075645	136103789		CCCCTAATTACATAATTTTAAGCATATATATAAAAATGTAAAATCTCATTGTCTGGCCTC	intergenic							225.414	37.4208	7.9148	4.76691	220.274	246.202	209.767	39.2506	42.2333	30.7785	8.01371	7.67144	8.05925	4.77437	5.06776	4.45861
ASHGA5P040365	0.0115646	0.0424216	6.17119	up	noncoding	ENST00000511029	CTD-2306M5.1	GENCODE	565	chr5	-	25404841	25422964		CACTTGCAGTGGAGATGATTCCATTGTAAAATGTTTCTTCATTCCCAATAGCACAATATA	intergenic							58.3862	13.0084	5.79465	3.1691	25.0758	122.19	27.8931	7.05636	13.4129	18.5561	5.17296	6.76832	5.44268	2.5442	3.28318	3.67994
ASHGA5P043305	0.000674828	0.00789665	4.5307	up	noncoding	TCONS_00019593	XLOC_009395	LincRNAs identified by Cabili et al	266	chr11	-	23825999	23829778		AGGAATGTAGGAAGGAAGGACATCAGGCTCTGAACATCCATCCATGTAAAACATTGAATA	intergenic							21.6875	8.50264	4.85997	2.68024	18.1868	27.1714	19.7044	13.3491	7.15879	5	4.75154	4.85125	4.97712	3.09084	2.60709	2.34278
ASHGA5P048542	0.000514934	0.00696476	4.30419	up	noncoding	TCONS_00027438	XLOC_013429	LincRNAs identified by Cabili et al	2615	chr19	-	58916678	58919843		GTTTGCGGCAGTGGGATCATTGGGCGGTGGGCGGTGTGGAGGAGTCTCCGCTGGTCCGCA	exon sense-overlapping	ENST00000444227	AC012313.1	Hepatocellular carcinoma-associated antigen HCA25a; Uncharacterized protein [Source:UniProtKB/TrEMBL;Acc:Q8NHH4]	-	58915622	58918663	205.483	65.9081	7.72511	5.61937	168.843	310.772	136.835	82.7689	57.7544	57.201	7.67293	7.98774	7.51467	5.91294	5.53984	5.40533
ASHGA5P021464	0.000416408	0.00626011	5.15258	up	noncoding	ENST00000532866	RP11-50B3.4	GENCODE	362	chr11	-	126078505	126078922		CCCATGCTAAAAATAGTCAAACAACAAAGATCATGTAACAACCCATGTAATCAGTTTGGT	intron sense-overlapping	NM_001144827	RPUSD4	RNA pseudouridylate synthase domain-containing protein 4 isoform b	-	126071988	126081587	21.0568	5.98519	4.82562	2.46033	25.1078	19.9821	18.0805	6.99624	5	5.95932	5.17473	4.44577	4.85636	2.54027	2.34646	2.49424
ASHGA5P021464	0.000416408	0.00626011	5.15258	up	noncoding	ENST00000532866	RP11-50B3.4	GENCODE	362	chr11	-	126078505	126078922		CCCATGCTAAAAATAGTCAAACAACAAAGATCATGTAACAACCCATGTAATCAGTTTGGT	intron sense-overlapping	NM_032795	RPUSD4	RNA pseudouridylate synthase domain-containing protein 4 isoform a	-	126071988	126081587	21.0568	5.98519	4.82562	2.46033	25.1078	19.9821	18.0805	6.99624	5	5.95932	5.17473	4.44577	4.85636	2.54027	2.34646	2.49424
ASHGA5P028320	0.00768123	0.0327221	2.00391	up	noncoding	ENST00000542314	RP1-278C19.3	GENCODE	707	chr12	+	120639129	120648322		CAAACTTTATTGGCATAAATCACAGGAATTGAAATGGGAAAAGCCAGCTTGGAAGTTTAC	natural antisense	NM_001080855	PXN	paxillin isoform 2	-	120648241	120703574	720.987	427.12	9.47242	8.4696	773.033	764.628	625.301	470.89	447.12	363.348	9.69257	9.20989	9.51481	8.55981	8.66265	8.18636
ASHGA5P028320	0.00768123	0.0327221	2.00391	up	noncoding	ENST00000542314	RP1-278C19.3	GENCODE	707	chr12	+	120639129	120648322		CAAACTTTATTGGCATAAATCACAGGAATTGAAATGGGAAAAGCCAGCTTGGAAGTTTAC	natural antisense	NM_001243756	PXN	paxillin isoform 3	-	120648241	120703574	720.987	427.12	9.47242	8.4696	773.033	764.628	625.301	470.89	447.12	363.348	9.69257	9.20989	9.51481	8.55981	8.66265	8.18636
ASHGA5P028320	0.00768123	0.0327221	2.00391	up	noncoding	ENST00000542314	RP1-278C19.3	GENCODE	707	chr12	+	120639129	120648322		CAAACTTTATTGGCATAAATCACAGGAATTGAAATGGGAAAAGCCAGCTTGGAAGTTTAC	natural antisense	NM_002859	PXN	paxillin isoform 1	-	120648241	120703574	720.987	427.12	9.47242	8.4696	773.033	764.628	625.301	470.89	447.12	363.348	9.69257	9.20989	9.51481	8.55981	8.66265	8.18636
ASHGA5P028320	0.00768123	0.0327221	2.00391	up	noncoding	ENST00000542314	RP1-278C19.3	GENCODE	707	chr12	+	120639129	120648322		CAAACTTTATTGGCATAAATCACAGGAATTGAAATGGGAAAAGCCAGCTTGGAAGTTTAC	natural antisense	NM_025157	PXN	paxillin isoform 4	-	120648241	120687964	720.987	427.12	9.47242	8.4696	773.033	764.628	625.301	470.89	447.12	363.348	9.69257	9.20989	9.51481	8.55981	8.66265	8.18636
ASHGA5P021654	0.00013106	0.00369461	4.20432	up	noncoding	ENST00000537361	HNF1A-AS1	GENCODE	659	chr12	-	121406415	121418709		AGAGAGCTCACTCAGCCAGCTGCTCCCTCTACCTGGAAACCTCCATTTGTCAAGCTGCTG	intronic antisense	NM_000545	HNF1A	hepatocyte nuclear factor 1-alpha	+	121416548	121440314	3906.29	1066.76	11.9043	9.8324	4208.04	4146.91	3363.92	1120.47	1100.52	979.306	12.0855	11.7003	11.927	9.84974	9.97681	9.67066
ASHGA5P042009	0.0105864	0.0400399	3.7382	up	noncoding	AL042013		LincRNAs identified by Khalil et al	824	chr14	+	60649741	60650565		GGAGGGAAGAACCAGCTCCACGAGCACTAGTAACTAGATGAGCTACATGAGCACTAGACA	intergenic							18.9432	8.14793	4.55331	2.65097	8.47787	27.2248	21.1268	7.35979	9.13504	7.94895	3.73115	4.85393	5.07486	2.56259	2.76068	2.62964
ASHGA5P053095	0.0111691	0.0414948	2.27149	up	noncoding	ENST00000456806	RP11-3N2.13	pseudogene	2252	chr7	+	63529271	63539697		CTGACTAATCAAAAGAGAATTCACCCTGGAGAGAATCCCTACAAATCTGAAGAATGTAAC								16.0154	13.7012	4.39194	3.2083	13.8583	23.8006	10.3873	13.7173	16.5248	10.8614	4.38276	4.67864	4.11443	3.13467	3.60244	2.8878
ASHGA5P027498	0.0362179	0.0895736	2.78311	up	noncoding	TCONS_00012358	XLOC_005917	LincRNAs identified by Cabili et al	400	chr6	-	166253091	166253578		TGGGGATGGCAGTGATGAGGATGGAGCAATTTAGAGAAATAGAGAGAGCCCTTGAACCAG	intergenic							19.6859	13.5727	4.67913	3.20243	16.8281	12.868	29.3615	13.761	12.4192	14.5379	4.64831	3.87478	5.51429	3.14002	3.1625	3.30477
ASHGA5P018865	0.0047097	0.024028	2.30313	up	noncoding	ENST00000458509	AC004041.2	GENCODE	407	chr5	-	131973739	131991846		ACATCAGAGGAATTTCTCCACATATTCAGAACGTCCTAAAAGCTCCACAAAATCTTCATC	natural antisense	NM_005732	RAD50	DNA repair protein RAD50	+	131892615	131980313	610.53	319.907	9.24863	8.04503	591.617	624.971	615.001	316.145	347.181	296.397	9.33418	8.92181	9.48989	7.95361	8.29511	7.88638
ASHGA5P043290	0.000239821	0.00477649	8.14051	up	noncoding	ENST00000413968	AC002066.1	GENCODE	1140	chr7	-	116047190	116139600		CATTTTAAAATAGTCATATATTCATATAGTAGAATAAAAAACTTGATAGTAGTTATCAAA	natural antisense	ENST00000222693	CAV2	caveolin 2 [Source:HGNC Symbol;Acc:1528]	+	116139443	116148595	31.5566	5	5.36845	2.34333	28.3212	29.6962	36.6525	5	5	5	5.33396	4.96569	5.80569	2.34074	2.34646	2.34278
ASHGA5P017185	0.00524385	0.0256933	2.52933	up	noncoding	uc002rde.2	FLJ12334	UCSC_knowngene	2387	chr2	+	20068614	20077296		ATGTGGTCAACCAGATCTCCTTGATTGCACGGTCAACCCCGCTCCTGTCTGTCAGGCTCA	intergenic							360.026	184.185	8.54354	7.20478	397.665	329.696	352.716	199.23	167.226	186.099	8.80231	8.0616	8.7667	7.25059	7.19163	7.17211
ASHGA5P035894	0.000364298	0.00586507	5.2729	up	noncoding	ENST00000433396	AC007392.3	GENCODE	682	chr2	+	66801161	66922637		CCAGGAATTAGAAAAAATAAACTGCTATTTCCGTGAGTTCCCCCTCTGTGAGCCATTTAG	intergenic							13963.5	3128.3	13.7829	11.3843	15111.6	13053.6	13725.3	3208.63	3450.69	2725.6	13.9313	13.4355	13.982	11.3722	11.6067	11.1741
ASHGA5P018146	0.0042417	0.0225773	2.43183	up	noncoding	ENST00000449955	AC093734.13	GENCODE	2224	chr7	-	1583449	1585885		CGCCCCACGGGCCCCGACAGAGGAGCAGGCCATGAGGCAGGCAGGAGCCGCGTATCTGGG	exon sense-overlapping	NM_001097620	TMEM184A	transmembrane protein 184A	-	1581870	1596066	37.8328	28.1583	5.59991	4.31787	33.9401	45.4973	34.0609	26.212	34.2199	24.043	5.56984	5.5227	5.70719	4.14403	4.73931	4.07026
ASHGA5P021650	7.36719e-05	0.00296101	12.2131	up	noncoding	ENST00000537170	RP11-21A7A.2	GENCODE	650	chr11	+	63803441	63871125		CGCTGCGCAGGTGAGGAAGCAGGCAGTGGGCGAGAAGATGGATTCCTTTTTGGACAGACA	intronic antisense	NM_014067	MACROD1	O-acetyl-ADP-ribose deacetylase MACROD1	-	63766029	63933585	62.1415	7.32188	6.15556	2.5452	57.0099	93.0696	36.3452	9.37224	5	7.59342	6.24565	6.42887	5.79216	2.68434	2.34646	2.60481
ASHGA5P031695	0.0316302	0.0814156	2.51953	up	noncoding	ENST00000563678	KIAA0664L3	pseudogene	1303	chr16	+	31714488	31719902		TTCCTAAGCAATTCGCAGGGGAGCTGCTCTGCCAGATCTGACTGCCTTTTACAGAACATT								45.8802	31.2142	5.81397	4.48081	36.3278	37.1466	64.1662	26.6984	29.8003	37.1439	5.65991	5.25557	6.52643	4.17046	4.51918	4.75279
ASHGA5P058207	0.0009075	0.00925068	5.84067	up	noncoding	TCONS_00028193	XLOC_013543	LincRNAs identified by Cabili et al	3722	chr20	+	46523132	46527679		ATGACCCTCACACTAGAACAGCAGCAGCAGCACAGGGAGGAGCTGCTGCTGTTCAAGACT	intergenic							33.1572	10.4877	5.43813	2.892	31.3648	33.9295	34.1774	9.58082	14.1391	7.74324	5.46323	5.13953	5.71164	2.69969	3.36143	2.61487
ASHGA5P018352	0.00180446	0.0135327	2.32187	up	noncoding	ENST00000452431	PCBP1-AS1	GENCODE	542	chr2	-	70223934	70315686	ENST00000415742, ENST00000421843, ENST00000458686, uc002sgb.1	CGGAGAAATGAGGAAGACAAACATAAAGATGAAGTGCTTAATTCAAGGTCACACAATGTC	natural antisense	NM_006196	PCBP1	poly(rC)-binding protein 1	+	70314584	70316334	60.5311	42.7312	6.19515	4.97987	47.0263	74.0481	60.5188	39.6698	41.0206	47.5032	5.99751	6.14359	6.44436	4.78959	5.02539	5.12462
ASHGA5P055512	4.48503e-05	0.00238725	6.01113	up	noncoding	ENST00000540875	RP11-221N13.4	GENCODE	545	chr12	+	66038113	66057079		GACCTTAGGTTAATATTTCATTTGGGTCAAGAAAAGAATATGTAGGAGAGCTATGTTGCT	intergenic							276.913	64.4401	8.1926	5.60496	284.451	300.698	245.588	70.3326	62.2726	60.715	8.35806	7.94979	8.26995	5.65739	5.66363	5.49387
ASHGA5P050663	0.000150135	0.00397134	3.39705	up	noncoding	ENST00000415574	AC093838.4	pseudogene	3023	chr2	+	132250385	132278255	ENST00000438378, uc010zax.1, uc010zay.1, uc010zaz.1	CTCCCCCCGCACTCCTGCCTCGCCATTTCCCCTCCCTGGCCGGCCGGCCGGCCTTCTTCG								79466.4	31553.7	16.52	14.7558	81975.2	93093.9	63330	35214.9	29033.2	30413	16.5785	16.6562	16.3255	14.8935	14.6288	14.745
ASHGA5P049092	1.44755e-06	0.000817472	9.37988	up	noncoding	TCONS_00023573	XLOC_011397	LincRNAs identified by Cabili et al	2770	chr15	-	22541417	22545668		TCCAGCTGCGACATGTGCTTCCTTCCCTTGGCCTGAGTCCTGCTTTCCTGTGATTGAGAA	intergenic							12470.5	1556.95	13.599	10.3694	13178.7	13486.8	10745.8	1693.79	1402.2	1574.87	13.709	13.4833	13.6047	10.4266	10.3276	10.354
ASHGA5P042087	6.42522e-05	0.00280617	26.7948	up	noncoding	ENST00000572284	RP3-509I19.6	GENCODE	509	chr6	-	139200035	139200544		CAACTAAAAAACTGCAATCTGGTTCCACTACATCCTAACTATTACAGTATAGTTTGCTCT	intronic antisense	NM_001077706	ECT2L	epithelial cell-transforming sequence 2 oncogene-like	+	139117247	139225207	11690.2	519.512	13.5013	8.75737	10172.5	12561.1	12337.1	568.938	592.784	396.814	13.3297	13.3658	13.8083	8.84148	9.09877	8.33187
ASHGA5P042087	6.42522e-05	0.00280617	26.7948	up	noncoding	ENST00000572284	RP3-509I19.6	GENCODE	509	chr6	-	139200035	139200544		CAACTAAAAAACTGCAATCTGGTTCCACTACATCCTAACTATTACAGTATAGTTTGCTCT	intronic antisense	NM_001195037	ECT2L	epithelial cell-transforming sequence 2 oncogene-like	+	139117247	139225207	11690.2	519.512	13.5013	8.75737	10172.5	12561.1	12337.1	568.938	592.784	396.814	13.3297	13.3658	13.8083	8.84148	9.09877	8.33187
ASHGA5P051864	0.000588315	0.00743187	2.14101	up	noncoding	NR_036512	LOC100129917	RefSeq	617	chr4	-	773936	775636	ENST00000503405, ENST00000503571, NR_036511	CTCTGCAGAGGCGCTGGAGCTGGGTCAGTCCGCCGCTCACCCCGCGGCCGCACCTTCCCG	intergenic							62.0311	47.4496	6.24006	5.14177	59.6585	71.2747	55.1601	44.929	47.0036	50.4162	6.30589	6.08924	6.32505	4.9792	5.23189	5.21422
ASHGA5P040430	0.00145131	0.0119043	3.36383	up	noncoding	ENST00000503452	RP11-53O19.1	GENCODE	738	chr5	-	44745001	44808879		AATTTTTTATATATAATTGACAAAATGAAGAAACTTAACACCATCCTAGATTTTAGCTGC	bidirectional	NM_016640	MRPS30	28S ribosomal protein S30, mitochondrial	+	44809026	44815618	174.222	74.814	7.58221	5.8321	190.463	174.851	157.352	80.2721	79.5138	64.656	7.81802	7.22851	7.7001	5.86412	6.04548	5.58671
ASHGA5P018243	0.00873578	0.035568	2.03913	up	noncoding	ENST00000451141	MIAT	GENCODE	568	chr22	+	27053243	27061913		CTGGGCGCGGGTCCACAGAACGAGGGGAAAGGGTCACTGTGGATCAAGCCAGGCTCCTCT	intergenic							7.21266	5.29387	3.41364	2.38569	5.82387	7.49765	8.31645	5.8816	5	5	3.25608	3.15374	3.83109	2.46781	2.34646	2.34278
ASHGA5P016533	0.00258927	0.0167962	3.81136	up	noncoding	ENST00000431401	RP1-290I10.5	GENCODE	256	chr6	-	10474732	10478735		CTCCCATCAGAGTTCAAACATTGAATTAGTTGTGCAATGGAAGGAGTATTACCAGGACCC	intergenic							21.5437	10.0784	4.79277	2.86246	23.2037	28.8458	12.5814	11.758	12.5145	5.96258	5.06992	4.92633	4.38206	2.91983	3.17327	2.49429
ASHGA5P027279	2.43046e-05	0.00183393	8.71621	up	noncoding	ENST00000548666	RP3-405J10.2	pseudogene	354	chr12	-	50611444	50612126		CATAAACTGTGCCCATTGTGTGCCCAATGACAAGGCTTATTAAGAAATTCATCATAGGCC								22700.1	3164.25	14.5207	11.397	21097.8	27053.4	19949.1	3067.17	2695.28	3730.31	14.4169	14.6055	14.5398	11.2968	11.2407	11.6536
ASHGA5P056753	0.000624468	0.00767204	3.42306	up	noncoding	TCONS_00008367	XLOC_003822	LincRNAs identified by Cabili et al	420	chr4	+	187653483	187659015		TCTCTTAATGGGTCTCTGCGGATGTAATTAAGAATCTTGAGATCATCCTGGATTATTTGG	intergenic							19.9933	11.743	4.76548	2.99019	17.63	22.9819	19.3679	12.3054	8.80856	14.1151	4.71278	4.62934	4.9543	2.98123	2.72765	3.26169
ASHGA5P028534	0.0294028	0.0775594	2.34333	up	noncoding	ENST00000566370	LINC00563	GENCODE	1400	chr13	-	46870579	46871979		TCCTCTGAGGTTTCTGCTGAGTCATATGCAGGCTCCATCTGATGTAGAGATTCAGTAGAA	intergenic							95.1823	64.5708	6.80699	5.57843	107.507	84.8136	93.2267	72.7888	75.6239	45.2997	7.09478	6.3054	7.02079	5.70563	5.97181	5.05785
ASHGA5P015333	5.06311e-05	0.00249907	2.73371	up	noncoding	uc010fif.2	ANKRD36B	UCSC_knowngene	1342	chr2	-	98167751	98206428		ACATGGTACAAATATTGAAGAATGCAGCAAGTGTCTCCTCAGAAACAACGAGCTGAGAAG	exon sense-overlapping	NM_025190	ANKRD36B	ankyrin repeat domain-containing protein 36B	-	98121260	98206428	542.386	244.37	9.0808	7.62994	515.074	629.519	482.566	258.611	216.204	258.296	9.1449	8.9312	9.1663	7.63751	7.5864	7.66591
ASHGA5P044075	3.50439e-05	0.00211704	8.49135	up	noncoding	NR_026817	LOC148696	RefSeq	4241	chr1	+	207991723	207995941		ATACCCATCTCCCTAGCATTCTTCCCTCTAAATAAAAAGTTTTGGGAGCCCTGAGCTCTT	natural antisense	ENST00000415882	C1orf132	chromosome 1 open reading frame 132 [Source:HGNC Symbol;Acc:32018]	-	207990581	208042495	28125	4060.67	14.8492	11.7632	27222.7	33934.1	23218	4362.52	4477.68	3341.82	14.8182	14.9747	14.7547	11.8272	11.963	11.4994
ASHGA5P014580	0.000478999	0.00670939	3.29656	up	noncoding	ENST00000411525	LINC00422	GENCODE	664	chr13	-	21899763	21922860		ATTCTTCCTAGATGATGCCGTCTGCCACGGGTCCCTTCCTCTCTCCAGCTGTCTGGAATG	intergenic							2231.49	780.379	11.1029	9.38197	2301.26	2277.84	2115.37	830.423	777.348	733.367	11.239	10.8049	11.2649	9.40558	9.49107	9.24925
ASHGA5P038280	0.00695905	0.0306878	2.09894	up	noncoding	uc003djn.3	BC041347	UCSC_knowngene	3689	chr3	-	58148275	58156345		TACTCTTTACTTTGTTCACCCATTGGGGAGTTCAGTTTGTTTTTAAACATTGGGAGATGG	natural antisense	NM_001164317	FLNB	filamin-B isoform 1	+	57994126	58157982	39443.8	23346.2	15.3822	14.3126	41974.9	40163	36193.6	26219.3	26930.6	16888.7	15.439	15.2611	15.4465	14.4968	14.5291	13.9118
ASHGA5P038280	0.00695905	0.0306878	2.09894	up	noncoding	uc003djn.3	BC041347	UCSC_knowngene	3689	chr3	-	58148275	58156345		TACTCTTTACTTTGTTCACCCATTGGGGAGTTCAGTTTGTTTTTAAACATTGGGAGATGG	natural antisense	NM_001164318	FLNB	filamin-B isoform 3	+	57994126	58157982	39443.8	23346.2	15.3822	14.3126	41974.9	40163	36193.6	26219.3	26930.6	16888.7	15.439	15.2611	15.4465	14.4968	14.5291	13.9118
ASHGA5P038280	0.00695905	0.0306878	2.09894	up	noncoding	uc003djn.3	BC041347	UCSC_knowngene	3689	chr3	-	58148275	58156345		TACTCTTTACTTTGTTCACCCATTGGGGAGTTCAGTTTGTTTTTAAACATTGGGAGATGG	natural antisense	NM_001164319	FLNB	filamin-B isoform 4	+	57994126	58157982	39443.8	23346.2	15.3822	14.3126	41974.9	40163	36193.6	26219.3	26930.6	16888.7	15.439	15.2611	15.4465	14.4968	14.5291	13.9118
ASHGA5P038280	0.00695905	0.0306878	2.09894	up	noncoding	uc003djn.3	BC041347	UCSC_knowngene	3689	chr3	-	58148275	58156345		TACTCTTTACTTTGTTCACCCATTGGGGAGTTCAGTTTGTTTTTAAACATTGGGAGATGG	natural antisense	NM_001457	FLNB	filamin-B isoform 2	+	57994126	58157982	39443.8	23346.2	15.3822	14.3126	41974.9	40163	36193.6	26219.3	26930.6	16888.7	15.439	15.2611	15.4465	14.4968	14.5291	13.9118
ASHGA5P036011	0.00105665	0.00994723	5.00101	up	noncoding	TCONS_00027066	XLOC_013108	LincRNAs identified by Cabili et al	1048	chr19	+	48824597	48826461		TAGGGAGCTGTGATGGGCGGGGCTGAGACCTGTGAGGAGAGTGAGTGGGAAGAACTTCGA	intergenic							152.569	42.4332	7.27675	4.95453	112.756	257.942	87.01	52.3696	37.1983	37.7316	7.16259	7.73732	6.93033	5.21225	4.87255	4.7788
ASHGA5P048109	8.55974e-05	0.00310983	2.93983	up	noncoding	uc021qjc.1	AB231739	UCSC_knowngene	289	chr11	-	56569551	56569840	ENST00000378368	CCTGTCCTCTCCCTGGCATATGCAGATACCCATATTAATAAATGTTTACTTTTTATCTTG	intergenic							13084.1	5190.59	13.675	12.1193	12205.9	15356	11690.4	5187.97	5645.4	4738.41	13.5967	13.6951	13.7333	12.0577	12.2914	12.0088
ASHGA5P016875	0.000131133	0.00369461	11.9223	up	noncoding	ENST00000435300	RP11-206L10.10	GENCODE	402	chr1	-	745488	753092		CTGTCTCAAGGAGGTATCTTAAATAGTGAAGATGGAGAAATAGTCAATAATGAAGAGCAT	intergenic							160.064	21.7057	7.47385	3.89826	162.562	179.559	138.071	27.3996	21.4742	16.2434	7.62903	7.2635	7.52902	4.21037	4.01312	3.47129
ASHGA5P029905	0.000371451	0.00593115	2.24033	up	noncoding	ENST00000454486	RP11-632K20.7	pseudogene	1483	chr15	-	32815226	32829127	ENST00000399971	TGTGTCCCCGCCCAGCTGCCGTGTCCCCGCCCAGCTGCCGTGTTCCCGCCCAACTGGGCC								12250.6	6272.16	13.5633	12.3996	12078.7	14515.6	10157.4	6209.82	5560.5	7046.17	13.5734	13.6075	13.5091	12.33	12.271	12.5978
ASHGA5P053734	0.00076088	0.00845641	2.00191	up	noncoding	uc001gsy.3	AK022030	UCSC_knowngene	3604	chr1	+	193057300	193060904		ACAAGCAAATTCATTCCAAGAAGTGAATATAGTAGTAAAACATAAAGACTATTGCAATAA	exon sense-overlapping	NM_001042369	TROVE2	60 kDa SS-A/Ro ribonucleoprotein isoform 1	+	193029003	193060906	11727.7	6681.04	13.4985	12.4971	12196.8	13915.6	9070.59	7298.64	6811.24	5933.23	13.5933	13.5509	13.3513	12.5772	12.5741	12.3401
ASHGA5P053734	0.00076088	0.00845641	2.00191	up	noncoding	uc001gsy.3	AK022030	UCSC_knowngene	3604	chr1	+	193057300	193060904		ACAAGCAAATTCATTCCAAGAAGTGAATATAGTAGTAAAACATAAAGACTATTGCAATAA	exon sense-overlapping	NM_001042370	TROVE2	60 kDa SS-A/Ro ribonucleoprotein isoform 3	+	193029003	193060906	11727.7	6681.04	13.4985	12.4971	12196.8	13915.6	9070.59	7298.64	6811.24	5933.23	13.5933	13.5509	13.3513	12.5772	12.5741	12.3401
ASHGA5P053734	0.00076088	0.00845641	2.00191	up	noncoding	uc001gsy.3	AK022030	UCSC_knowngene	3604	chr1	+	193057300	193060904		ACAAGCAAATTCATTCCAAGAAGTGAATATAGTAGTAAAACATAAAGACTATTGCAATAA	exon sense-overlapping	NM_001173525	TROVE2	60 kDa SS-A/Ro ribonucleoprotein isoform 4	+	193029003	193060906	11727.7	6681.04	13.4985	12.4971	12196.8	13915.6	9070.59	7298.64	6811.24	5933.23	13.5933	13.5509	13.3513	12.5772	12.5741	12.3401
ASHGA5P054980	0.0300504	0.0786719	3.03559	up	noncoding	ENST00000430109	RP4-758J18.10	GENCODE	510	chr1	-	1365918	1369953		TTGCCTAAAAAAGGAAGCAGCAGGCTGAGGCTGAGGAGCTGGCGGCAGGAACAAGGGAGA	bidirectional	NM_022834	VWA1	von Willebrand factor A domain-containing protein 1 isoform 1 precursor	+	1370902	1378262	57.5609	28.0382	5.92098	4.319	21.6405	96.1325	54.9095	33.0955	23.6466	27.3724	4.97466	6.46824	6.32004	4.51371	4.1651	4.27819
ASHGA5P054980	0.0300504	0.0786719	3.03559	up	noncoding	ENST00000430109	RP4-758J18.10	GENCODE	510	chr1	-	1365918	1369953		TTGCCTAAAAAAGGAAGCAGCAGGCTGAGGCTGAGGAGCTGGCGGCAGGAACAAGGGAGA	bidirectional	NM_199121	VWA1	von Willebrand factor A domain-containing protein 1 isoform 2 precursor	+	1370902	1378262	57.5609	28.0382	5.92098	4.319	21.6405	96.1325	54.9095	33.0955	23.6466	27.3724	4.97466	6.46824	6.32004	4.51371	4.1651	4.27819
ASHGA5P038157	0.00799065	0.0335969	3.4436	up	noncoding	ENST00000422374	RP11-466L17.1	GENCODE	4063	chr1	+	56046709	56200675		AATCCCTTCACCCTCTCTCCATCTTTGTAAAAATTCTCCTCATTAAATTATTGTTCAGTG	intergenic							5494.91	1687.99	12.2637	10.4798	4178.32	9278.89	3027.53	1950.3	1555.29	1558.38	12.0776	12.9476	11.766	10.6313	10.4662	10.342
ASHGA5P033728	0.0127809	0.0449959	2.4557	up	noncoding	TCONS_00016487	XLOC_007865	LincRNAs identified by Cabili et al	1809	chr9	-	132100957	132102959		TACACAGTGACACGTGTGTACATACAGCCCCATACTCACCCTGACACGTAGGTACACACT	intergenic							513.57	260.411	9.01225	7.71611	585.148	464.262	491.301	290.159	278.849	212.225	9.3169	8.53073	9.18911	7.81624	7.96401	7.36807
ASHGA5P022943	0.0171105	0.054176	2.333	up	noncoding	ENST00000566054	RP11-65J21.1	GENCODE	518	chr16	-	14456965	14464123		GAAGCACCATGCAGCATAAACACCCTTGAGATCATCCAAGTAGTGGCGAGTATCGGCAGC	intergenic							12.3207	9.9266	4.06383	2.84164	7.62083	16.7709	12.5704	7.06263	12.8276	9.88958	3.59024	4.22037	4.38086	2.54439	3.2123	2.76824
ASHGA5P007456	0.0031187	0.018567	2.65597	up	noncoding	uc002tjq.4	LOC654433	UCSC_knowngene	2328	chr2	+	113993106	114024580		ATGGCGAAGGGCCAGGGCCCCACACCTTCCGCCTGACAGCCAGCCAAGCTCTTCAGTCCC	intronic antisense	NM_013953	PAX8	paired box protein Pax-8 isoform PAX8D	-	113973573	114036498	169.444	91.771	7.54659	6.13735	183.856	173.292	151.184	100.514	97.1654	77.6335	7.77775	7.21611	7.64593	6.2001	6.34623	5.86573
ASHGA5P007456	0.0031187	0.018567	2.65597	up	noncoding	uc002tjq.4	LOC654433	UCSC_knowngene	2328	chr2	+	113993106	114024580		ATGGCGAAGGGCCAGGGCCCCACACCTTCCGCCTGACAGCCAGCCAAGCTCTTCAGTCCC	intronic antisense	NM_013992	PAX8	paired box protein Pax-8 isoform PAX8E	-	113973573	114036498	169.444	91.771	7.54659	6.13735	183.856	173.292	151.184	100.514	97.1654	77.6335	7.77775	7.21611	7.64593	6.2001	6.34623	5.86573
ASHGA5P007456	0.0031187	0.018567	2.65597	up	noncoding	uc002tjq.4	LOC654433	UCSC_knowngene	2328	chr2	+	113993106	114024580		ATGGCGAAGGGCCAGGGCCCCACACCTTCCGCCTGACAGCCAGCCAAGCTCTTCAGTCCC	natural antisense	NM_003466	PAX8	paired box protein Pax-8 isoform PAX8A	-	113973573	114036498	169.444	91.771	7.54659	6.13735	183.856	173.292	151.184	100.514	97.1654	77.6335	7.77775	7.21611	7.64593	6.2001	6.34623	5.86573
ASHGA5P007456	0.0031187	0.018567	2.65597	up	noncoding	uc002tjq.4	LOC654433	UCSC_knowngene	2328	chr2	+	113993106	114024580		ATGGCGAAGGGCCAGGGCCCCACACCTTCCGCCTGACAGCCAGCCAAGCTCTTCAGTCCC	natural antisense	NM_013952	PAX8	paired box protein Pax-8 isoform PAX8C	-	113973573	114036498	169.444	91.771	7.54659	6.13735	183.856	173.292	151.184	100.514	97.1654	77.6335	7.77775	7.21611	7.64593	6.2001	6.34623	5.86573
ASHGA5P021008	0.0379552	0.0925226	2.18517	up	noncoding	ENST00000523317	RP11-513H8.1	GENCODE	426	chr8	-	135224107	135332690		GTCACACACGATGGGAGAATTGAAGCTCATGAATAAACAAGTTGTCCTCGCCAAAATTCC	intergenic							14.8872	13.9264	4.34917	3.22143	12.0313	12.7445	19.8858	16.2538	10.3623	15.1632	4.19637	3.86116	4.98998	3.38846	2.9085	3.36732
ASHGA5P043734	0.00708259	0.0310474	3.4914	up	noncoding	uc003uce.3	AL831977	UCSC_knowngene	5003	chr7	+	74800776	74806099	uc003ubp.3	TATATACTTGAATTAAAAATATATGGTGGCTCAAATGTGCCCGCGTGTATGGCAGACGGT	intergenic							24.1742	13.3641	4.95114	3.14734	14.8911	33.0435	24.5878	18.8494	12.0033	9.23958	4.48118	5.10427	5.26798	3.61834	3.11077	2.71291
ASHGA5P052952	0.000207397	0.00448913	4.32141	up	noncoding	ENST00000524978	AC093734.11	GENCODE	380	chr7	+	1609869	1615607		AATTAAACAAGACGTGCAAAGCAAGTGGTTCACGAGGTAGTGTGGGGGTGTAGGGATGGG	intronic antisense	ENST00000252329	PSMG3	proteasome (prosome, macropain) assembly chaperone 3 [Source:HGNC Symbol;Acc:22420]	-	1607248	1610641	519.259	152.873	9.02568	6.91418	498.045	588.867	470.865	134.414	154.089	170.117	9.098	8.84326	9.13579	6.64391	7.05963	7.039
ASHGA5P022008	0.00722224	0.0313915	4.91417	up	noncoding	ENST00000547009	RP11-762I7.4	GENCODE	529	chr12	-	56155333	56156412		TTAAAAGTTTGTGTGAGCCACTGTGCCCTTGTTTGAACTCTTGCTTATCTGTCCTTCTGT	intron sense-overlapping	NM_033082	SARNP	SAP domain-containing ribonucleoprotein	-	56151053	56211540	1571.95	379.105	10.5742	8.27722	1858.21	1147.61	1710.03	403.045	441.562	292.708	10.9522	9.78704	10.9833	8.32285	8.64649	7.8623
ASHGA5P035403	0.00312392	0.0185868	3.37731	up	noncoding	BQ447228		LincRNAs identified by Khalil et al	403	chr12	+	38450353	38450755		TCAAGCTCAACAAAGGAAGAAAGAAAGTAAAGTAAAAGGTCAGCTTCCAAAGCGGTGGAG	intergenic							14.8719	7.23823	4.29821	2.54233	8.87122	20.5862	15.1582	7.61806	5	9.09663	3.79336	4.48331	4.61795	2.57818	2.34646	2.70235
ASHGA5P033501	0.00841287	0.0347126	2.56919	up	noncoding	ENST00000577327	RP11-91I8.3	GENCODE	491	chr18	-	6728819	6729861		TAAACTTGATTTCCTTTTGGGTCAGGTAATCCCCTTTTACAGCAAGGGAACGCTTCCCTC	natural antisense	ENST00000383472	ARHGAP28	Rho GTPase activating protein 28 [Source:HGNC Symbol;Acc:25509]	+	6729716	6912154	94.2667	58.1753	6.79726	5.43595	99.5098	86.873	96.4174	67.5501	59.9836	46.9923	6.98799	6.34169	7.0621	5.59656	5.60293	5.10835
ASHGA5P033501	0.00841287	0.0347126	2.56919	up	noncoding	ENST00000577327	RP11-91I8.3	GENCODE	491	chr18	-	6728819	6729861		TAAACTTGATTTCCTTTTGGGTCAGGTAATCCCCTTTTACAGCAAGGGAACGCTTCCCTC	natural antisense	ENST00000400091	ARHGAP28	Rho GTPase activating protein 28 [Source:HGNC Symbol;Acc:25509]	+	6729820	6898718	94.2667	58.1753	6.79726	5.43595	99.5098	86.873	96.4174	67.5501	59.9836	46.9923	6.98799	6.34169	7.0621	5.59656	5.60293	5.10835
ASHGA5P014993	0.000802455	0.00868327	3.2481	up	noncoding	ENST00000415503	AC006547.13	GENCODE	508	chr22	-	20050502	20053600		AGAGTTTTATTATCAGGAGCTCACATTCAGGAGCAGGTCTGCTTGTCAAGAGTCCAAGCA	natural antisense	NM_152906	C22orf25	uncharacterized protein C22orf25	+	20008630	20053447	152.26	69.0325	7.40501	5.70541	152.319	177.358	127.104	71.8527	77.1341	58.1106	7.54609	7.24614	7.4228	5.68724	5.99954	5.42946
ASHGA5P027988	5.00967e-05	0.00248515	22.7124	up	noncoding	ENST00000440688	RP5-1028L10.2	GENCODE	508	chr1	-	110720264	110721341		TGTGTCATCCTGCATGAACTGTTTGTGTAAAGGGGTGTGTGTGTGTACACACATGTGCAA	intronic antisense	NM_001010898	SLC6A17	sodium-dependent neutral amino acid transporter SLC6A17	+	110693131	110744823	1737.36	98.6249	10.7426	6.23721	1409.15	1957.23	1845.68	112.925	103.903	79.0463	10.5692	10.5743	11.0843	6.37072	6.44747	5.89343
ASHGA5P027098	0.000992669	0.00971652	3.47207	up	noncoding	BQ638596		LincRNAs identified by Khalil et al	619	chr8	-	110193209	110194971		ATGCCTAGGAAGAACAGAGAGGGGAAGAAATATCTTGACATTTGTTCCCCACTTCTTGAC	intergenic							13.166	5.90302	4.21993	2.42414	13.71	12.5187	13.2693	7.70907	5	5	4.36812	3.83834	4.45334	2.58316	2.34646	2.34278
ASHGA5P058633	0.00906312	0.036404	3.44765	up	noncoding	uc011lrd.2	KGFLP1	UCSC_knowngene	3612	chr9	+	46687565	46748386		GCATTAAACTAAAAACCTTAATAAGCTGTATCTGTTTCATATGCTTTTAATTTTAAAGGA	intergenic							79.4077	38.583	6.57304	4.78743	82.7839	72.0782	83.361	32.0652	51.5319	32.1519	6.738	6.1051	6.87603	4.46043	5.37193	4.52991
ASHGA5P030129	2.03217e-05	0.00170952	25.811	up	noncoding	ENST00000557800	RP11-138H8.6	GENCODE	755	chr15	-	71141221	71142109		AATAACATTAACATAATTACTTATTTTCTTTGTATTACAATGTGTAAAAATGATTCAAAG	intron sense-overlapping	NM_018357	LARP6	la-related protein 6 isoform 1	-	71123888	71146498	137.322	7.17749	7.26836	2.57844	158.933	141.059	111.974	7.77905	8.56959	5.18382	7.59999	6.95582	7.24925	2.58784	2.70831	2.43918
ASHGA5P049547	0.00423289	0.0225548	5.26456	up	noncoding	ENST00000577750	KRT16P1	GENCODE	681	chr17	+	18345434	18346209	ENST00000578023, ENST00000584759	TCTCCCACAGTCTTCACCTCCTCTTCGTCCTCTTCGAGCCGTCAGACCTGGCCCATCCTC	intergenic							13163.4	2658.9	13.5372	11.1408	12206.8	20999.5	6283.96	2782.17	2850.29	2344.24	13.5976	14.1849	12.8289	11.1502	11.3342	10.9382
ASHGA5P021811	0.0464951	0.106854	3.18917	up	noncoding	ENST00000541383	RP11-173P15.3	GENCODE	575	chr12	-	121134926	121137304		TCTCCCATACATTCCCTATGGTGGTAAAGGAGAAGACATTCAAGCAGAGAACCCCAAATC	natural antisense	NM_014730	MLEC	malectin precursor	+	121124948	121139667	59.6472	27.5189	5.96061	4.28742	101.973	55.6978	21.2706	31.6562	28.2614	22.639	7.02176	5.77741	5.08265	4.44357	4.43744	3.98127
ASHGA5P046097	6.58673e-05	0.00281998	3.33519	up	noncoding	ENST00000424415	RP11-706O15.5	GENCODE	2194	chrX	-	3809478	3820041		CTCAGTACATCTTAATAAGGAATTAATGCCCCCCAACTTGCCTTACAAGTCATATATTAA	intergenic							3314.37	1132.87	11.6537	9.91596	3415.35	3691.8	2835.96	1182.78	964.995	1250.85	11.7825	11.5112	11.6675	9.92678	9.80231	10.0188
ASHGA5P015134	0.0111036	0.0413295	2.15615	up	noncoding	ENST00000417089	H19	GENCODE	1444	chr11	-	2016463	2018255		ACGAGGGTGACCAGGTCTCCAGCTGGGGTGGACGTGCCCACCAGCTGCCGAAGGCCAAGA	intergenic							13.2672	12.6492	4.20832	3.09986	16.6699	11.9693	11.1626	13.3662	12.3029	12.2784	4.63419	3.77908	4.21168	3.09245	3.14722	3.05992
ASHGA5P045456	0.00654342	0.0295458	6.72978	up	noncoding	TCONS_00000891	XLOC_000144	LincRNAs identified by Cabili et al	236	chr1	+	37235455	37238931		ATTGTGGAAGGCGGAAGGGCGAGAGAGGCTGGGTGACACCTCTTCTGTAAGGAGCTTAAC	intergenic							83.9056	20.1209	6.4395	3.68894	54.2469	151.136	46.3339	25.5005	9.64202	25.2201	6.17865	7.04334	6.0965	4.10088	2.82046	4.14548
ASHGA5P022473	0.0331734	0.0840496	2.23324	up	noncoding	ENST00000557551	RP11-1017G21.4	GENCODE	566	chr14	-	102502651	102510740		ATCTTATCCGAACCACCGCAAAGCTTTATCCTTCTGATACAAAATGAAGTCTTACAAAGT	natural antisense	NM_001376	DYNC1H1	cytoplasmic dynein 1 heavy chain 1	+	102430864	102517135	16.8425	15.5466	4.50583	3.34669	12.5129	21.5057	16.5091	11.2352	12.679	22.7256	4.24867	4.53981	4.72902	2.85779	3.19371	3.98857
ASHGA5P023591	0.00243334	0.0162119	3.4106	up	noncoding	ENST00000585190	RP11-567L7.5	GENCODE	215	chr17	-	57477848	57480664		CCCAGAATGGCCAATACTGATGCAAGAAAATATTTCAATTCTCAACCTGATTAATGTACT	natural antisense	NM_001005404	YPEL2	protein yippee-like 2	+	57409052	57479095	1351.02	470.71	10.3772	8.60717	1090.28	1584.54	1378.22	473.568	560.06	378.501	10.1979	10.2707	10.663	8.57007	8.9988	8.25264
ASHGA5P022965	0.00098037	0.00965093	3.72736	up	noncoding	ENST00000566607	RP11-491F9.6	GENCODE	309	chr16	+	49370593	49371256		ATGAGGGGATGAATCTCAGTTGCACTCAGTTGTTGCCCCCCTCGAACCTCCCTTGAGCCT	intergenic							5509.08	1715.61	12.4074	10.5093	6022.15	5095.18	5409.9	1856.11	1721.32	1569.39	12.5968	12.0003	12.6252	10.5649	10.6137	10.3493
ASHGA5P023162	0.000141418	0.00382058	5.14282	up	noncoding	ENST00000571901	RP11-156P1.3	GENCODE	808	chr17	-	45076065	45144835		TTGGACAGATGATGCCAGTTAATTACTTTGAATGGGTCTGTCACACGCAGCCCAACTCAA	intronic antisense	ENST00000439730	GOSR2	golgi SNAP receptor complex member 2 [Source:HGNC Symbol;Acc:4431]	+	45000498	45105003	431.904	110.993	8.78861	6.42605	454.797	453.238	387.677	125.596	105.456	101.928	8.98092	8.49977	8.88513	6.53204	6.4697	6.2764
ASHGA5P026548	0.0113261	0.0419044	2.28182	up	noncoding	AK094629R		LincRNAs identified by Khalil et al	2028	chr6	+	161411345	161413374		TCAAAACGTGCGTTTCACCTATCAAAGCTCAACTAAATGAGGTTTAAGAAATCTGCACAT	exon sense-overlapping	ENST00000348824	MAP3K4	mitogen-activated protein kinase kinase kinase 4 [Source:HGNC Symbol;Acc:6856]	+	161412845	161538414	25.4142	21.2152	5.08477	3.89459	26.3512	22.0282	27.8632	22.637	20.8846	20.124	5.24291	4.57007	5.44132	3.91021	3.96906	3.80448
ASHGA5P026548	0.0113261	0.0419044	2.28182	up	noncoding	AK094629R		LincRNAs identified by Khalil et al	2028	chr6	+	161411345	161413374		TCAAAACGTGCGTTTCACCTATCAAAGCTCAACTAAATGAGGTTTAAGAAATCTGCACAT	exon sense-overlapping	ENST00000366919	MAP3K4	mitogen-activated protein kinase kinase kinase 4 [Source:HGNC Symbol;Acc:6856]	+	161412758	161538417	25.4142	21.2152	5.08477	3.89459	26.3512	22.0282	27.8632	22.637	20.8846	20.124	5.24291	4.57007	5.44132	3.91021	3.96906	3.80448
ASHGA5P026548	0.0113261	0.0419044	2.28182	up	noncoding	AK094629R		LincRNAs identified by Khalil et al	2028	chr6	+	161411345	161413374		TCAAAACGTGCGTTTCACCTATCAAAGCTCAACTAAATGAGGTTTAAGAAATCTGCACAT	exon sense-overlapping	ENST00000366920	MAP3K4	mitogen-activated protein kinase kinase kinase 4 [Source:HGNC Symbol;Acc:6856]	+	161412845	161538414	25.4142	21.2152	5.08477	3.89459	26.3512	22.0282	27.8632	22.637	20.8846	20.124	5.24291	4.57007	5.44132	3.91021	3.96906	3.80448
ASHGA5P026548	0.0113261	0.0419044	2.28182	up	noncoding	AK094629R		LincRNAs identified by Khalil et al	2028	chr6	+	161411345	161413374		TCAAAACGTGCGTTTCACCTATCAAAGCTCAACTAAATGAGGTTTAAGAAATCTGCACAT	exon sense-overlapping	ENST00000392142	MAP3K4	mitogen-activated protein kinase kinase kinase 4 [Source:HGNC Symbol;Acc:6856]	+	161412815	161538417	25.4142	21.2152	5.08477	3.89459	26.3512	22.0282	27.8632	22.637	20.8846	20.124	5.24291	4.57007	5.44132	3.91021	3.96906	3.80448
ASHGA5P026548	0.0113261	0.0419044	2.28182	up	noncoding	AK094629R		LincRNAs identified by Khalil et al	2028	chr6	+	161411345	161413374		TCAAAACGTGCGTTTCACCTATCAAAGCTCAACTAAATGAGGTTTAAGAAATCTGCACAT	exon sense-overlapping	NM_005922	MAP3K4	mitogen-activated protein kinase kinase kinase 4 isoform a	+	161412821	161538417	25.4142	21.2152	5.08477	3.89459	26.3512	22.0282	27.8632	22.637	20.8846	20.124	5.24291	4.57007	5.44132	3.91021	3.96906	3.80448
ASHGA5P026548	0.0113261	0.0419044	2.28182	up	noncoding	AK094629R		LincRNAs identified by Khalil et al	2028	chr6	+	161411345	161413374		TCAAAACGTGCGTTTCACCTATCAAAGCTCAACTAAATGAGGTTTAAGAAATCTGCACAT	exon sense-overlapping	NM_006724	MAP3K4	mitogen-activated protein kinase kinase kinase 4 isoform b	+	161412821	161538417	25.4142	21.2152	5.08477	3.89459	26.3512	22.0282	27.8632	22.637	20.8846	20.124	5.24291	4.57007	5.44132	3.91021	3.96906	3.80448
ASHGA5P039297	0.000219037	0.00460867	5.48226	up	noncoding	TCONS_00024147	XLOC_011515	LincRNAs identified by Cabili et al	684	chr15	-	68775546	68777423	TCONS_00023714, TCONS_00024148	GCCTGCCTCTCCTGCCCTGTGGTGTTGCTGTCCTCATATGACCCTTCAGTCCCCCGACAT	intergenic							128438	35327.8	17.3622	14.9074	120668	159389	105258	36364.7	29750.6	39868.2	17.26	17.6477	17.1788	14.9376	14.6732	15.1114
ASHGA5P042193	0.000239291	0.00477468	5.45847	up	noncoding	ENST00000457833	XXyac-YX65C7_A.3	GENCODE	654	chr6	-	169686628	169687571		AATACAATATCAACTTCTGGGATGCATTCTTAAAGAAAGCGGTCTGCCCTCTCCCCTCTG	intergenic							7235.4	1554.79	12.8131	10.3646	8084.94	6808.31	6812.96	1688.53	1556.87	1418.96	13.027	12.4574	12.955	10.4232	10.4668	10.204
ASHGA5P039831	0.00521546	0.0255914	9.91843	up	noncoding	ENST00000515691	RP11-168E17.1	GENCODE	541	chr4	+	12225074	12249731		GCATCTCCCTTTATCATCATCCTATTTTAAAGAGTAACACTGACTCGCAAACAATTTAGT	intergenic							4246.99	405.357	11.7103	8.40018	3324.82	8038.87	1377.29	431.008	385.335	399.728	11.7401	12.73	10.6608	8.41949	8.44048	8.34057
ASHGA5P045261	2.19836e-05	0.00176998	25.7287	up	noncoding	uc011lrg.1	LOC441426	UCSC_knowngene	1423	chr9	-	69379291	69380714		GACAGCATTCCTGAGACTTTTTAAGTACTTTGTGTGTGTGTGATGGTCTAATAATCATAG	intergenic							9293.36	424.9	13.149	8.46365	7122.1	11716.2	9041.78	470.323	437.421	366.955	12.8358	13.2686	13.3424	8.5579	8.62937	8.20367
ASHGA5P019409	6.54498e-05	0.00281434	6.53497	up	noncoding	ENST00000482378	TMEM198B	GENCODE	2162	chr12	+	56224684	56230030	NR_036477	TGGCAGGATGGCTACTGCTGCTTCAAGACAGTGACGTTTCTCTCCGGTCAGCTGTCAGGA	natural antisense	NM_002429	MMP19	matrix metalloproteinase-19 isoform rasi-1 preproprotein	-	56229213	56236735	232.575	51.3843	7.95683	5.24865	219.8	257.813	220.112	57.8131	41.2856	55.0543	8.00993	7.73647	8.12408	5.359	5.0364	5.35054
ASHGA5P008493	9.86676e-05	0.00326582	3.03232	up	noncoding	ENST00000343738	PKD1P6	pseudogene	4769	chr16	-	15219098	15248421		GGGCCCACCAAGGGAGGCTGGCGGGTGTGCGCTGAACTTTGGGCCCCGCGGGAGCAGCAC								94.7606	47.5802	6.74525	5.14483	71.5778	134.913	77.7908	51.7207	43.5894	47.4306	6.55732	6.89524	6.7832	5.19576	5.11577	5.12296
ASHGA5P055594	0.000175973	0.00416039	2.63274	up	noncoding	ENST00000550185	RP11-626I20.3	GENCODE	3059	chr12	+	103941571	103953593		GACTGGGATTTTTTTAAAGCTCTCTTCCCTTCCCCACCTTGAGTGTACAATGGAGAGTGC	intergenic							7414.13	3270.79	12.86	11.4634	7163.44	8034.57	7044.38	3504.54	3297.7	3010.13	12.8436	12.7273	13.009	11.5064	11.5461	11.3378
ASHGA5P056651	0.000507776	0.00690618	9.7148	up	noncoding	TCONS_00006917	XLOC_002730	LincRNAs identified by Cabili et al	308	chr3	+	96336526	96337039		CCTCTACCTATAAATCTTCCCACTAATTTCTATCGCCTATACTTTATTTGGGTAAATGGT	intergenic							2700.27	328.78	11.3604	8.08023	2351.35	2457.59	3291.87	373.764	332.507	280.07	11.2636	10.9199	11.8977	8.20948	8.2341	7.79712
ASHGA5P010611	0.0040916	0.0220103	2.11476	up	noncoding	ENST00000444410	PCBP1-AS1	GENCODE	555	chr2	-	70259360	70314147	ENST00000366234, ENST00000435880	TGCGGAGCGGAGGAAGACAAACATAAAGATGAAGTGCTTAATTCAAGGTCACACAATGTC	bidirectional	NM_006196	PCBP1	poly(rC)-binding protein 1	+	70314584	70316334	56.0774	44.1925	6.08741	5.00692	44.1442	73.4281	50.6597	47.7596	33.4938	51.3241	5.91533	6.13283	6.21407	5.06992	4.70471	5.24612
ASHGA5P035341	4.1523e-05	0.00233644	2.6059	up	noncoding	ENST00000546678	RP11-570L15.2	GENCODE	506	chr2	-	144053154	144329674		TTGTTCTCAGCTTCCTTCTCCCCTGACATTCTCAGTACCTCTCTATTCATGAAATCCTAC	intronic antisense	NM_018460	ARHGAP15	rho GTPase-activating protein 15	+	143886898	144525921	5439.13	2388.13	12.3754	10.9936	5065.25	6758.05	4494.08	2489.28	2428.64	2246.46	12.3518	12.4454	12.3289	11.006	11.0936	10.8812
ASHGA5P047059	0.000745211	0.00833875	2.69303	up	noncoding	uc001kwr.3	BC040734	UCSC_knowngene	1553	chr10	-	104958488	105036751		ACTTGGAGAAGCAGGAGGCGCTGGGAATTGCTGGGGCTCATCGTTAGGGCACTAAAGCAT	intronic antisense	NM_001143909	LOC729020	rcRPE protein	+	105005643	105007773	39.4598	25.8202	5.62171	4.19248	32.8177	54.4446	31.1171	30.6527	25.0208	21.7873	5.52428	5.74829	5.59255	4.39491	4.2556	3.92693
ASHGA5P021474	0.000123305	0.00358719	4.932	up	noncoding	ENST00000533009	RP1-65P5.3	GENCODE	150	chr11	-	32118688	32126637	ENST00000517509, ENST00000520432, NR_024458, uc001vac.3, uc010tfr.2	TGGAGGTTTCATATACACCACTTACAGTTTTCAGCTCCTCAGTAGTGACAAAGCCATCCC	natural antisense	NM_002901	RCN1	reticulocalbin-1 precursor	+	32112476	32127272	466.913	123.076	8.88756	6.58539	502.794	485.677	412.269	128.316	113.307	127.605	9.11102	8.58792	8.96374	6.56673	6.58202	6.60741
ASHGA5P051593	0.000222194	0.00463057	5.38808	up	noncoding	ENST00000482617	RP11-6B4.1	GENCODE	596	chr3	+	81043018	81144798		CCGACTACAGAAGAAAGGAACAAATTAAATCCATTAATCAAGCATATCTCTGCTAAACAG	intergenic							59.5765	19.4991	6.19135	3.76158	67.4107	60.0856	51.2331	21.2626	19.5442	17.6903	6.47347	5.87175	6.22884	3.81124	3.86555	3.60796
ASHGA5P048040	0.00645657	0.0293417	2.41984	up	noncoding	ENST00000501541	RP11-613D13.8	GENCODE	2045	chr11	-	43965336	43968756		TCAGGAGCCTCACAGACATATCCAGGTAAAAAGATCGTTAAATAAATGCCTTCAGCCATC	natural antisense	NM_001145033	C11orf96	uncharacterized protein C11orf96	+	43964105	43965433	124.407	77.1836	7.15223	5.87731	132.06	126.27	114.891	72.9139	89.3268	69.3102	7.36254	6.81214	7.282	5.70863	6.22566	5.69765
ASHGA5P030464	1.62523e-05	0.0016084	3.48535	up	noncoding	ENST00000567002	RP11-64K12.10	GENCODE	1594	chr15	+	40666598	40668192		GAATCCTACTCTGGCTCCTTGCTCTGCGCTGTAAAAAACAAATAAAAGGGCCACTTGAGA	intergenic							1174.28	400.803	10.1839	8.38264	1100.81	1423.86	998.161	455.492	361.564	385.354	10.212	10.1337	10.2062	8.51352	8.35408	8.28031
ASHGA5P029115	0.018788	0.0576469	2.11423	up	noncoding	ENST00000557160	RP11-831F12.2	GENCODE	568	chr14	-	50174384	50175510		ATAATAGTTCAAAAATAACCAGCTGGGCGCAGTGGCTCAGCCAGCATTTTGTAATCCCAG	intronic antisense	NM_172193	KLHDC1	kelch domain-containing protein 1	+	50159822	50219870	303.546	185.241	8.23871	7.15858	267.456	452.414	190.768	193.865	125.102	236.755	8.27931	8.49841	7.93842	7.20784	6.73585	7.53204
ASHGA5P032925	0.00117267	0.0105702	3.05077	up	noncoding	ENST00000577087	RP11-311F12.1	GENCODE	3370	chr17	+	19622371	19625741		AAATAATAACAACGGGGCATTTCTTGAGATCTCTAGGGAACATGTCCCCCTCTTGCCCAT	intergenic							269.379	119.938	8.15619	6.54702	285.093	266.815	256.231	125.915	118.046	115.853	8.36094	7.78279	8.32483	6.53606	6.64686	6.45813
ASHGA5P035383	0.00618588	0.0285438	2.21256	up	noncoding	TCONS_00004466	XLOC_002344	LincRNAs identified by Cabili et al	426	chr2	-	145281130	145282228		AGCCTTAGTGAGATTGACAGTCGCGTGGAGGAGGCTTTTCCAGGCACAGCCTTTCTCATG	intergenic							42.3082	33.2404	5.74326	4.59755	35.044	43.7805	48.1	32.913	34.1477	32.6605	5.61006	5.47319	6.14654	4.50335	4.73489	4.55441
ASHGA5P042981	0.00052712	0.00702851	2.41765	up	noncoding	uc003tbk.4	AL137445	UCSC_knowngene	1422	chr7	-	30617110	30625588		AACGTAGTAAGTTTATGTTTTTAAGGTCTGCCCCTCCCTTCTTGCATTATATCATAAACT	intergenic							29792.6	14881.6	14.9704	13.6968	32743.7	28935.8	27698.3	15334.7	14453.8	14856.4	15.1146	14.7248	15.0717	13.698	13.659	13.7333
ASHGA5P021413	0.00336645	0.0194596	2.15506	up	noncoding	NR_027635	SPATA5L1	RefSeq	2610	chr15	+	45694518	45713616		AAGGAGCTGAAAAAATGAAGAGAGTTTCAAGAAGTTTTTAACCGAAGTGTCATGATTATT	exon sense-overlapping	NM_024063	SPATA5L1	spermatogenesis-associated protein 5-like protein 1	+	45694518	45713616	1449.51	782.133	10.4891	9.38142	1423.49	1616.67	1308.36	821.209	857.086	668.105	10.5824	10.294	10.5911	9.39016	9.6339	9.12019
ASHGA5P022567	0.000388493	0.0060482	2.28321	up	noncoding	ENST00000558909	RP13-98N21.2	pseudogene	5114	chr15	+	82888223	82924290		AGTACATCACCAGGTTCCTTGATTGTAGGGCTCTGTGCCCCCTCCCACCTCTCCTCCTCT								8454.27	4288.23	13.0461	11.855	9116.18	8613.9	7632.74	4382.57	4270.85	4211.27	13.1864	12.8377	13.1142	11.8309	11.8967	11.8375
ASHGA5P013624	0.000140707	0.0038162	2.81268	up	noncoding	ENST00000395215	RP11-24M17.5	GENCODE	1184	chr15	+	76067893	76075544		GTCGGTGGGGCTGAGCCCCCATCCCCGGCACCCCCAGCAGTGACCTCTGTGGTGGAGCAG	intergenic							1452.56	600.996	10.4924	9.00047	1422.5	1614.5	1320.68	618.152	579.829	605.008	10.5806	10.2925	10.6042	8.96811	9.06091	8.9724
ASHGA5P025677	0.00398632	0.021651	4.1795	up	noncoding	NR_024582	JPX	RefSeq	1696	chrX	+	73164158	73290217		CTTGTGATCTATTGTTCACTGTTGGCATATAGAAACACTACTGATGCCTCAGAGATGACC	intergenic							34.9221	15.3631	5.42802	3.3647	34.4758	48.9369	21.3535	11.6161	20.3981	14.0752	5.58748	5.60846	5.08814	2.90439	3.93287	3.25682
ASHGA5P045454	0.0317102	0.0815359	2.24299	up	noncoding	ENST00000545631	MIR600HG	GENCODE	1665	chr9	-	125871779	125873444		ATGGACTGCCCTTCCCCTCTGAGGCAATTATTACATGTAGGACTCTGAACTTTAAACCTT	intergenic							5113.32	2742.98	12.2844	11.119	4926.06	6225.96	4187.95	3498.64	1485.91	3244.39	12.3154	12.3069	12.231	11.5035	10.402	11.4515
ASHGA5P032103	0.00168605	0.0129991	2.35585	up	noncoding	uc002fxw.1	AX748345	UCSC_knowngene	1890	chr17	-	4384323	4389747		TTTTCCTATCAGCTCCTCGTGGCTTTCTTGGCCGCCCAAAGCTGTTCACGTGAACGTGCC	natural antisense	NM_182538	SPNS3	protein spinster homolog 3	+	4337218	4391499	816.885	409.351	9.65274	8.41649	869.005	839.69	741.961	440.669	364.303	423.082	9.86027	9.33242	9.76553	8.4573	8.36544	8.42674
ASHGA5P028437	0.000970991	0.00959493	2.06096	up	noncoding	ENST00000420140	LINC00357	GENCODE	1059	chr13	-	25511013	25512491	ENST00000415121, ENST00000426585, ENST00000443554	TCTGCTTCCACTTACTTTATTTTTGAAGACACTAATTGCTACACTGAATAAAACCTTAAT	intergenic							44.8851	37.2632	5.80664	4.76333	47.2255	54.203	33.2269	42.6094	33.5451	35.635	6.00348	5.74193	5.67453	4.89542	4.70714	4.68742
ASHGA5P018538	0.000458646	0.00659984	5.30477	up	noncoding	NR_026963	TTC28-AS1	RefSeq	5125	chr22	+	28315363	28398667		CAAATAGTACTTCAAGAGCACAGTCTTATGTAAGTAAACACTGGGATGCCGGAGCTCAGG	natural antisense	NM_001145418	TTC28	tetratricopeptide repeat protein 28	-	28374001	29075853	43.761	14.5842	5.69505	3.28776	31.4765	69.4189	30.3876	18.1429	11.7728	13.8369	5.46908	6.05429	5.56177	3.55139	3.08188	3.23
ASHGA5P021163	0.000545075	0.00714219	4.56922	up	noncoding	ENST00000526695	CTD-2516F10.2	GENCODE	557	chr11	-	7462645	7487061		ATGTGTGAGTGACCGAGCTGAAGAAGCCCCCGTCTTCCAGCGCATGTTATTCCCATGACA	intronic antisense	NM_175733	SYT9	synaptotagmin-9	+	7273180	7490276	1579.5	411.261	10.6142	8.42221	1739.8	1534.31	1464.4	408.094	432.986	392.704	10.855	10.2278	10.7597	8.33914	8.61368	8.31382
ASHGA5P037015	7.27588e-05	0.00294232	3.4379	up	noncoding	ENST00000413983	RP11-410N8.3	GENCODE	469	chr20	+	31148894	31161690		ATAAAGCCTTTCACCCCTAGCCTGCTCCTGTCTCAACCTCAACCTCCAGAGAACATCCAT	intronic antisense	NM_001256798	C20orf112	uncharacterized protein C20orf112 isoform 1	-	31030861	31172875	3965.33	1298.09	11.8876	10.1061	3579.29	5308.77	3007.91	1342.96	1299.32	1251.98	11.8514	12.0605	11.751	10.0939	10.2045	10.02
ASHGA5P054641	0.000154564	0.00398469	2.08778	up	noncoding	ENST00000524824	RP11-326C3.12	GENCODE	587	chr11	+	327309	330122	ENST00000534483	TCCAGTCCCCTCCCCACCCTATCCTGGAGCTTGTCAAGGCCACCAGAGACCTGCTCCCTG	intergenic							59558.1	37077.4	16.0428	14.9808	62940.4	65890.6	49843.1	39389.1	36359.2	35483.8	16.1522	16.0322	15.9439	15.0717	14.917	14.9537
ASHGA5P026296	0.000392884	0.00609729	3.46228	up	noncoding	ENST00000524444	RP4-541C22.4	GENCODE	568	chr11	+	33730980	33731568		CACTTTTCCAGTGGAAGATAACAAAGCCCATATAAAATTTAAAGACAGAGGAAAAACTCG	natural antisense	NM_000611	CD59	CD59 glycoprotein preproprotein	-	33724555	33758025	630.706	223.933	9.29192	7.5002	600.494	680.679	610.946	220.375	233.988	217.436	9.35232	9.04362	9.47983	7.4004	7.69948	7.40072
ASHGA5P026296	0.000392884	0.00609729	3.46228	up	noncoding	ENST00000524444	RP4-541C22.4	GENCODE	568	chr11	+	33730980	33731568		CACTTTTCCAGTGGAAGATAACAAAGCCCATATAAAATTTAAAGACAGAGGAAAAACTCG	natural antisense	NM_001127223	CD59	CD59 glycoprotein preproprotein	-	33724555	33744273	630.706	223.933	9.29192	7.5002	600.494	680.679	610.946	220.375	233.988	217.436	9.35232	9.04362	9.47983	7.4004	7.69948	7.40072
ASHGA5P026296	0.000392884	0.00609729	3.46228	up	noncoding	ENST00000524444	RP4-541C22.4	GENCODE	568	chr11	+	33730980	33731568		CACTTTTCCAGTGGAAGATAACAAAGCCCATATAAAATTTAAAGACAGAGGAAAAACTCG	natural antisense	NM_001127225	CD59	CD59 glycoprotein preproprotein	-	33724555	33744273	630.706	223.933	9.29192	7.5002	600.494	680.679	610.946	220.375	233.988	217.436	9.35232	9.04362	9.47983	7.4004	7.69948	7.40072
ASHGA5P026296	0.000392884	0.00609729	3.46228	up	noncoding	ENST00000524444	RP4-541C22.4	GENCODE	568	chr11	+	33730980	33731568		CACTTTTCCAGTGGAAGATAACAAAGCCCATATAAAATTTAAAGACAGAGGAAAAACTCG	natural antisense	NM_001127226	CD59	CD59 glycoprotein preproprotein	-	33724555	33744273	630.706	223.933	9.29192	7.5002	600.494	680.679	610.946	220.375	233.988	217.436	9.35232	9.04362	9.47983	7.4004	7.69948	7.40072
ASHGA5P026296	0.000392884	0.00609729	3.46228	up	noncoding	ENST00000524444	RP4-541C22.4	GENCODE	568	chr11	+	33730980	33731568		CACTTTTCCAGTGGAAGATAACAAAGCCCATATAAAATTTAAAGACAGAGGAAAAACTCG	natural antisense	NM_001127227	CD59	CD59 glycoprotein preproprotein	-	33724555	33744498	630.706	223.933	9.29192	7.5002	600.494	680.679	610.946	220.375	233.988	217.436	9.35232	9.04362	9.47983	7.4004	7.69948	7.40072
ASHGA5P026296	0.000392884	0.00609729	3.46228	up	noncoding	ENST00000524444	RP4-541C22.4	GENCODE	568	chr11	+	33730980	33731568		CACTTTTCCAGTGGAAGATAACAAAGCCCATATAAAATTTAAAGACAGAGGAAAAACTCG	natural antisense	NM_203329	CD59	CD59 glycoprotein preproprotein	-	33724555	33758025	630.706	223.933	9.29192	7.5002	600.494	680.679	610.946	220.375	233.988	217.436	9.35232	9.04362	9.47983	7.4004	7.69948	7.40072
ASHGA5P026296	0.000392884	0.00609729	3.46228	up	noncoding	ENST00000524444	RP4-541C22.4	GENCODE	568	chr11	+	33730980	33731568		CACTTTTCCAGTGGAAGATAACAAAGCCCATATAAAATTTAAAGACAGAGGAAAAACTCG	natural antisense	NM_203330	CD59	CD59 glycoprotein preproprotein	-	33724555	33758025	630.706	223.933	9.29192	7.5002	600.494	680.679	610.946	220.375	233.988	217.436	9.35232	9.04362	9.47983	7.4004	7.69948	7.40072
ASHGA5P026296	0.000392884	0.00609729	3.46228	up	noncoding	ENST00000524444	RP4-541C22.4	GENCODE	568	chr11	+	33730980	33731568		CACTTTTCCAGTGGAAGATAACAAAGCCCATATAAAATTTAAAGACAGAGGAAAAACTCG	natural antisense	NM_203331	CD59	CD59 glycoprotein preproprotein	-	33724555	33758025	630.706	223.933	9.29192	7.5002	600.494	680.679	610.946	220.375	233.988	217.436	9.35232	9.04362	9.47983	7.4004	7.69948	7.40072
ASHGA5P051665	0.000240803	0.00477649	5.39709	up	noncoding	ENST00000504808	RP11-77P16.4	GENCODE	545	chr3	+	129831494	129838359		TTATCGGGGACACTCATTAAAAATGTGAGTCTGCTCCAGATGGACTCTCTCTCTTTCTGC	intergenic							151.554	42.8304	7.41145	4.97927	149.101	159.312	146.249	47.6752	43.9611	36.8547	7.52499	7.10479	7.60457	5.06748	5.12725	4.74307
ASHGA5P014936	0.00384988	0.0211227	2.56543	up	noncoding	ENST00000414927	RP11-307B6.3	GENCODE	494	chr1	+	201862969	201869106		AGACAGGGAGGGGCTGCTGATGCTGGTAGAGACAGAGCTGAGGCCACAGTCCTACCCTCT	natural antisense	NM_012134	LMOD1	leiomodin-1	-	201865583	201915716	105.609	60.606	6.87339	5.51419	66.7581	143.568	106.5	63.7058	61.2256	56.8867	6.45938	6.97866	7.18214	5.50824	5.6368	5.39754
ASHGA5P027224	0.00541777	0.0261968	4.07609	up	noncoding	ENST00000550426	RP11-493L12.2	GENCODE	683	chr12	-	47599680	47609983	ENST00000547626, ENST00000547851, ENST00000551898, uc001rpo.1	AGGAGGCAGGAGGTGGAGCAAAACACACCAAGCCTGGTGCCAATCATTGACAATATTATG	intronic antisense	ENST00000546455	PCED1B	PC-esterase domain containing 1B [Source:HGNC Symbol;Acc:28255]	+	47473385	47630443	83.9384	30.4838	6.46095	4.43376	58.8287	146.874	46.112	33.9086	35.1549	22.388	6.28753	7.00591	6.0894	4.55321	4.78401	3.96405
ASHGA5P056653	0.0122093	0.0438618	3.16447	up	noncoding	TCONS_00006919	XLOC_002730	LincRNAs identified by Cabili et al	393	chr3	+	96336528	96337035		TAAATTTAAACTGTTCTTAGGTAGCTCGTCTGGTTTCGGGGGCCTTAGCTTTGGTTCTCT	intergenic							3325.53	1231.97	11.6542	9.99222	2885.17	3154.64	3936.76	1345.67	1506.56	843.685	11.5279	11.2805	12.1542	10.0952	10.4185	9.463
ASHGA5P057970	0.000399669	0.0061541	3.68698	up	noncoding	TCONS_00024490	XLOC_011810	LincRNAs identified by Cabili et al	462	chr16	+	86052352	86061287		TAAGAGGAAGCAGCAATGCTCTGTGTAAAGACACTCCACACACACACTCAGGAAATGGAA	intergenic							157.559	60.508	7.39317	5.51073	117.857	232.579	122.242	55.2867	65.9291	60.3084	7.21721	7.59537	7.36694	5.29496	5.75278	5.48446
ASHGA5P029399	9.96754e-05	0.00328262	105.832	up	noncoding	uc021rnj.1	BC016035	UCSC_knowngene	1170	chr14	+	19650031	19719035	ENST00000553214	TTGATTGTTAGGGAAGTATAACTTAAAAGTTTATAAAGTTTCACATACTTCTCTTTATAT	intergenic							2105.97	28.8449	11.018	4.2924	2253.55	2155.54	1908.83	27.4821	41.0791	17.9734	11.2081	10.7174	11.1286	4.21657	5.02819	3.63243
ASHGA5P040524	0.0120725	0.0435133	4.70776	up	noncoding	ENST00000503007	CTD-2201I18.1	GENCODE	956	chr5	-	79348196	79378227		GACAGACTAGCTAGAAGGGCTTTCTGATTCCAGAACAATACTAAGTTTCCTGAAGTAAAG	intronic antisense	NM_003248	THBS4	thrombospondin-4 precursor	+	79331169	79379107	214.891	63.2958	7.79024	5.5552	155.598	164.369	324.704	69.0605	74.346	46.4809	7.57034	7.14716	8.65321	5.63051	5.94319	5.09188
ASHGA5P042975	0.000177071	0.00418133	4.61482	up	noncoding	ENST00000434399	AC005154.6	GENCODE	1217	chr7	-	30555924	30602441	uc003tbd.3	TTTAAGTGTATGTCTCTAAGAAAATTTAATAATTGATTAAATATTGTTGAATAGACTGAA	intergenic							17.6896	5	4.5496	2.34333	18.516	23.242	11.3108	5	5	5	4.77408	4.6447	4.23003	2.34074	2.34646	2.34278
ASHGA5P027897	0.00773344	0.0328762	2.3963	up	noncoding	ENST00000538640	RP11-1060J15.7	GENCODE	427	chr12	+	27857500	27861296		GAAAATATTTTATATACTGAAGTGTAAGCTTACGAAAATTTCAGAGAACCTAGTATAAAT	intergenic							77.9016	52.3741	6.5428	5.28199	83.7687	78.8187	71.1173	52.626	61.5143	42.9821	6.75238	6.21848	6.65754	5.2199	5.64501	4.98106
ASHGA5P016745	0.00671784	0.0300207	3.35786	up	noncoding	ENST00000433695	RP11-465B22.3	GENCODE	540	chr1	+	999874	1001654		TGATGGGGAAGGTGGGGGCGGTTGTGCACCTCAAGCAGGTAGCTGAAGCAGAGAGAGAAG	intergenic							20.2546	12.0427	4.7784	3.03086	22.458	16.3141	21.9918	12.9309	13.5571	9.64027	5.02691	4.1835	5.1248	3.04675	3.29977	2.74606
ASHGA5P031626	0.000167626	0.00410257	3.75178	up	noncoding	ENST00000566108	CTD-2540M10.1	GENCODE	293	chr16	+	24621586	24652278		AACAATTTAATACAAAAACACAAGCAGGTTCCCCTCCTCTCCTTTGCCTTTGGTCTGGCT	intergenic							8682.02	2729.83	13.0863	11.1787	9025.57	8562.94	8457.56	2950.67	2640.74	2598.07	13.1743	12.8257	13.2589	11.2407	11.2036	11.0919
ASHGA5P046974	0.00910976	0.0365392	2.23661	up	noncoding	ENST00000432108	RP11-219F10.1	GENCODE	309	chr10	-	85671409	85672678		TGTTTTGAAGGGGCTGGAAGTCTTTTCTGTCACCACCTTTACCTACCTGTCATCTGTGAA	intergenic							494.85	275.255	8.96734	7.80603	495.825	482.679	506.045	300.568	289.098	236.1	9.08928	8.57997	9.23278	7.87364	8.01674	7.52771
ASHGA5P015065	0.00754944	0.0323578	2.3566	up	noncoding	uc001vdx.3	DLEU2	UCSC_knowngene	1406	chr13	-	50618047	50656139	ENST00000416253	ATCCAGGAAGTAGCAAGAAATGTGGATAATTACTGTACCTTCCTCATGGAAAAAGTTTTA	bidirectional	ENST00000378180	DLEU1	deleted in lymphocytic leukemia 1 (non-protein coding) [Source:HGNC Symbol;Acc:13747]	+	50656306	50679433	2430.93	1196.64	11.2172	9.98053	2327.45	2605.83	2359.5	1251.11	1417.81	920.991	11.2523	11.0012	11.3982	10.0065	10.3464	9.58871
ASHGA5P015143	0.00021664	0.00456913	6.24714	up	noncoding	ENST00000417244	MLLT4-AS1	GENCODE	182	chr6	-	168225708	168226140		GTTGTAACAAAAAGCGTTTATCTTTGAAACACTAAGACAATTAAAGAATTCTGTCATCCC	intergenic							25.1364	5	4.98652	2.34333	25.607	35.1435	14.6588	5	5	5	5.20288	5.18395	4.57274	2.34074	2.34646	2.34278
ASHGA5P022859	0.00409516	0.0220235	2.13346	up	noncoding	ENST00000564165	RP11-19N8.4	GENCODE	685	chr16	-	33057849	33106752		TTCTGAAGGGCTGTCCTGAGACCATGTTATCTCTACCTGCATTCTGGAATCAGGGAGAAA	intergenic							251.755	158.131	8.06373	6.97053	254.352	271.75	229.161	170.77	165.731	137.892	8.20763	7.80742	8.17614	7.00874	7.17929	6.72357
ASHGA5P048492	0.00251224	0.0165081	2.2281	up	noncoding	ENST00000501918	RP11-334E6.10	GENCODE	507	chr11	-	119206958	119208019		TGGGAGTGACAGGGGAAAGAGCAGAAATCCGGTTATCCCTCCTGAGACTCCCAGTGAGCT	natural antisense	NM_032015	RNF26	RING finger protein 26	+	119205209	119208024	352.499	204.515	8.52012	7.3643	343.923	362.644	350.931	207.773	192.201	213.572	8.60816	8.19307	8.75912	7.31382	7.4017	7.37739
ASHGA5P043616	0.00204203	0.0145851	3.37824	up	noncoding	ENST00000449644	AC018647.3	GENCODE	1651	chr7	+	35756083	35774497		CTAGCGAAAGCACTGAGAATAGAGTGTGATATCTCCTATTAAAAAACACATACGTATACA	intergenic							16.1912	8.60713	4.40314	2.64687	15.5291	23.4014	9.64312	10.4888	5	10.3326	4.53701	4.6528	4.0196	2.77512	2.34646	2.81902
ASHGA5P042824	0.00266883	0.0169932	4.60532	up	noncoding	TCONS_00019778	XLOC_009577	LincRNAs identified by Cabili et al	7833	chr11	-	119478389	119489008		AGAGACACACACTTGACTCACAGCAATCGATGAGAAGCAGGGATCGCCATTTACATAAGA	intergenic							17.8864	5	4.54663	2.34333	10.2001	21.4536	22.0054	5	5	5	3.97665	4.53738	5.12586	2.34074	2.34646	2.34278
ASHGA5P007971	0.000171264	0.00410615	3.58851	up	noncoding	ENST00000398377	GOLGA2P2Y	GENCODE	1060	chrY	-	26356113	26360978	NR_001555, uc004fwv.3	CTGAAGCTTGGAGAACCTGGAAGCTACCAGCCAGCAGAAACAGCAGCTAAAGCCCAGTTG	intergenic							14.4239	6.56505	4.30924	2.46585	14.204	17.96	11.1078	9.69516	5	5	4.41676	4.30729	4.20365	2.70831	2.34646	2.34278
ASHGA5P048571	0.00111512	0.0102288	2.15614	up	noncoding	ENST00000560810	WHAMMP3	GENCODE	2944	chr15	-	23197977	23207968		TAACTTATTTTTCTTTTTTCTATGAAAATAAGATGGAAGATCTTCCAGAACAAGAAAAAA	intergenic							169.017	106.529	7.47279	6.36434	142.041	252.658	112.353	109.66	98.4636	111.463	7.45709	7.70646	7.25482	6.3258	6.36514	6.40208
ASHGA5P055818	0.00972916	0.0378952	2.63127	up	noncoding	NR_038991	RBM26-AS1	RefSeq	2484	chr13	+	79980443	79998468		AATTCGGAAATGATTTTGAAAATTGTGTTGGTTTTTAATGTAAGTTTATATGTCAGCTTT	bidirectional	NM_022118	RBM26	RNA-binding protein 26	-	79894099	79979923	1173.17	532.241	10.1885	8.79272	1270.4	1190.8	1058.3	513.582	658.529	424.612	10.43	9.84293	10.2925	8.68861	9.25583	8.43372
ASHGA5P038572	0.036626	0.0902656	3.41018	up	noncoding	ENST00000421034	RP11-71G7.1	GENCODE	326	chr3	-	176344066	176352245		AGCAACCAAATAAAGATGATTGAGTGAATGGCTAAAGAAATAAATATGTTCGAATCTGTA	intergenic							22.3258	12.3352	4.84371	3.07387	31.6165	21.261	14.0998	6.27181	21.6057	9.12813	5.47694	4.52675	4.52745	2.49507	4.02139	2.70514
ASHGA5P054777	0.0115651	0.0424216	2.02778	up	noncoding	ENST00000425496	RP4-669L17.10	GENCODE	2661	chr1	+	324755	328453	ENST00000426316, ENST00000512765, NR_024368, NR_024497, NR_026999, NR_028322, NR_028324, NR_028326, NR_028327, NR_037596, NR_039983, uc002khh.3	TATAAATCCCAAAATATTGAATTTTGGAATATTTCCACCATTATGTAAATATTTTGATAG	intergenic							3248.06	1859.71	11.6306	10.6107	3514.51	3208.09	3021.59	1641.6	2164.35	1773.2	11.8216	11.3088	11.7614	10.3832	10.9313	10.5175
ASHGA5P037123	9.65909e-05	0.00324692	2.48574	up	noncoding	ENST00000442780	RP11-560A15.4	GENCODE	377	chr20	+	55680796	55682184		AGATGGTTCAAGGGTTGTGTGTGTTTCCTCTGCCTGCTGTAATAAATTACTACAAACTAA	intergenic							1471.2	683.253	10.505	9.19132	1487.77	1750.22	1175.6	742.774	644.737	662.249	10.6495	10.4123	10.4532	9.23968	9.22389	9.11038
ASHGA5P041397	1.89418e-05	0.00170952	4.83831	up	noncoding	TCONS_00021939	XLOC_010533	LincRNAs identified by Cabili et al	457	chr13	-	23550009	23551904		GGTACCTGCTGCCCTGCCTGGAACCCACCTCCTTAAGAATCCTGACTGCCCCACAGGAAC	intergenic							15655.1	3732.83	13.9335	11.659	14320.3	20100.3	12544.8	3897.78	3636.71	3664	13.8392	14.1238	13.8375	11.6713	11.6743	11.6313
ASHGA5P037858	5.47493e-05	0.00262344	3.15843	up	noncoding	ENST00000432032	AP000355.2	GENCODE	480	chr22	+	24912475	24914354		GTCAGCCTGCACTTGTCTCTCTTGTCCTCATTCTTGACTAAATTTCAGTTGAATTTCTTC	intron sense-overlapping	NM_016327	UPB1	beta-ureidopropionase	+	24891250	24922553	2414.43	866.572	11.1996	9.54036	2485.22	2807	1951.05	947.507	837.462	814.746	11.3299	11.1117	11.1571	9.60097	9.60596	9.41417
ASHGA5P028541	0.000397013	0.00613417	4.60379	up	noncoding	TCONS_00009844	XLOC_004257	LincRNAs identified by Cabili et al	548	chr5	+	2940841	2965533		CTGACTCAATGCAAAAGGCGAAAACACCAATTTAGTTGTTGCTGCGGCTGCTTTTCATGC	intergenic							25.3881	10.1927	5.04255	2.83973	19.7007	35.1609	21.3027	14.1873	8.92928	7.46144	4.85824	5.18428	5.08514	3.18384	2.73816	2.5972
ASHGA5P045074	0.00158628	0.0125817	2.37871	up	noncoding	ENST00000529247	RP11-661A12.7	GENCODE	431	chr8	+	144661805	144662840		ATCTTGTTGAAAGCTGCGATATCGACACTCTGCACCTGAGGAGAGGCGGAGGGTGACGGT	natural antisense	NM_001130053	EEF1D	elongation factor 1-delta isoform 1	-	144661866	144679845	222.484	128.095	7.89878	6.64861	224.512	239.23	203.71	136.501	130.733	117.052	8.04187	7.6325	8.02198	6.66716	6.8038	6.47486
ASHGA5P045074	0.00158628	0.0125817	2.37871	up	noncoding	ENST00000529247	RP11-661A12.7	GENCODE	431	chr8	+	144661805	144662840		ATCTTGTTGAAAGCTGCGATATCGACACTCTGCACCTGAGGAGAGGCGGAGGGTGACGGT	natural antisense	NM_001130055	EEF1D	elongation factor 1-delta isoform 2	-	144661866	144679845	222.484	128.095	7.89878	6.64861	224.512	239.23	203.71	136.501	130.733	117.052	8.04187	7.6325	8.02198	6.66716	6.8038	6.47486
ASHGA5P045074	0.00158628	0.0125817	2.37871	up	noncoding	ENST00000529247	RP11-661A12.7	GENCODE	431	chr8	+	144661805	144662840		ATCTTGTTGAAAGCTGCGATATCGACACTCTGCACCTGAGGAGAGGCGGAGGGTGACGGT	natural antisense	NM_001130056	EEF1D	elongation factor 1-delta isoform 4	-	144661866	144679845	222.484	128.095	7.89878	6.64861	224.512	239.23	203.71	136.501	130.733	117.052	8.04187	7.6325	8.02198	6.66716	6.8038	6.47486
ASHGA5P045074	0.00158628	0.0125817	2.37871	up	noncoding	ENST00000529247	RP11-661A12.7	GENCODE	431	chr8	+	144661805	144662840		ATCTTGTTGAAAGCTGCGATATCGACACTCTGCACCTGAGGAGAGGCGGAGGGTGACGGT	natural antisense	NM_001130057	EEF1D	elongation factor 1-delta isoform 2	-	144661866	144679558	222.484	128.095	7.89878	6.64861	224.512	239.23	203.71	136.501	130.733	117.052	8.04187	7.6325	8.02198	6.66716	6.8038	6.47486
ASHGA5P045074	0.00158628	0.0125817	2.37871	up	noncoding	ENST00000529247	RP11-661A12.7	GENCODE	431	chr8	+	144661805	144662840		ATCTTGTTGAAAGCTGCGATATCGACACTCTGCACCTGAGGAGAGGCGGAGGGTGACGGT	natural antisense	NM_001195203	EEF1D	elongation factor 1-delta isoform 5	-	144661866	144679845	222.484	128.095	7.89878	6.64861	224.512	239.23	203.71	136.501	130.733	117.052	8.04187	7.6325	8.02198	6.66716	6.8038	6.47486
ASHGA5P045074	0.00158628	0.0125817	2.37871	up	noncoding	ENST00000529247	RP11-661A12.7	GENCODE	431	chr8	+	144661805	144662840		ATCTTGTTGAAAGCTGCGATATCGACACTCTGCACCTGAGGAGAGGCGGAGGGTGACGGT	natural antisense	NM_001960	EEF1D	elongation factor 1-delta isoform 2	-	144661866	144679845	222.484	128.095	7.89878	6.64861	224.512	239.23	203.71	136.501	130.733	117.052	8.04187	7.6325	8.02198	6.66716	6.8038	6.47486
ASHGA5P045074	0.00158628	0.0125817	2.37871	up	noncoding	ENST00000529247	RP11-661A12.7	GENCODE	431	chr8	+	144661805	144662840		ATCTTGTTGAAAGCTGCGATATCGACACTCTGCACCTGAGGAGAGGCGGAGGGTGACGGT	natural antisense	NM_032378	EEF1D	elongation factor 1-delta isoform 1	-	144661866	144679845	222.484	128.095	7.89878	6.64861	224.512	239.23	203.71	136.501	130.733	117.052	8.04187	7.6325	8.02198	6.66716	6.8038	6.47486
ASHGA5P014681	0.00492659	0.0246818	2.76404	up	noncoding	ENST00000412420	RP1-23K20.2	GENCODE	294	chrX	-	130150442	130192120		GCCAACTCAGTGAGAAAGCAATCATCTGCAAGCCGGGAAGAGAGCCCTCATCAGAACTCA	bidirectional	NM_144967	ARHGAP36	rho GTPase-activating protein 36 precursor	+	130192215	130223857	42.7706	27.4894	5.76068	4.2939	49.7627	38.475	40.0742	27.5481	29.6873	25.2327	6.07118	5.29846	5.91238	4.22113	4.51415	4.1464
ASHGA5P056817	0.00592639	0.0277495	2.59176	up	noncoding	TCONS_00008982	XLOC_003839	LincRNAs identified by Cabili et al	232	chr4	+	190198382	190198838	TCONS_00008385, TCONS_00008387, TCONS_00008983	ACATCGTAGGTGACAGGCTCTCATAGTCACCATCATCAAGGGAATCTTGTGCATGTTACA	intergenic							21.751	16.7021	4.87006	3.49613	22.0401	25.0068	18.2061	19.1654	19.0687	11.8723	5.0003	4.74545	4.86444	3.64655	3.82759	3.01424
ASHGA5P040724	0.00138574	0.0116428	2.82965	up	noncoding	ENST00000504539	RP11-256P1.1	GENCODE	411	chr5	-	137682715	137685330		ACTCTGGGTAAGCCCAATATGTGAAAATTCAAATAGTCAAAACAGCTAAAGTGGAGGGAG	natural antisense	NM_001135647	FAM53C	protein FAM53C	+	137673223	137685418	109.854	58.6982	6.96194	5.46131	88.2854	139.131	102.147	52.5732	67.1053	56.4161	6.81885	6.93701	7.12995	5.21839	5.78077	5.38478
ASHGA5P040724	0.00138574	0.0116428	2.82965	up	noncoding	ENST00000504539	RP11-256P1.1	GENCODE	411	chr5	-	137682715	137685330		ACTCTGGGTAAGCCCAATATGTGAAAATTCAAATAGTCAAAACAGCTAAAGTGGAGGGAG	natural antisense	NM_016605	FAM53C	protein FAM53C	+	137673703	137685418	109.854	58.6982	6.96194	5.46131	88.2854	139.131	102.147	52.5732	67.1053	56.4161	6.81885	6.93701	7.12995	5.21839	5.78077	5.38478
ASHGA5P023650	0.0022044	0.0152381	2.81676	up	noncoding	HMlincRNA1294+	HMlincRNA1294	LincRNAs identified by Khalil et al	9350	chr2	+	72079817	72089167		TAGTGTATCTTGTTTTATAAAGATATTGGGGCAGTGTGCCCGCTCCCTGCTAAGAGCTCT	intergenic							230.346	112.688	7.94684	6.4528	244.305	229.769	216.963	119.645	117.34	101.079	8.15672	7.57869	8.10511	6.45829	6.63642	6.2637
ASHGA5P046070	0.000752532	0.0083873	3.4337	up	noncoding	uc022bqt.1	JA040723	UCSC_knowngene	806	chrM	-	8366	14149		TTTAATATTTTTAGTTGGGTGATGAGGAATAGTGTAAGGAGTATGGGGGTAATTATGGTG	intergenic							510.578	187.811	8.98299	7.20322	401.535	657.759	472.442	175.585	150.17	237.678	8.81574	8.99256	9.14067	7.05322	7.01901	7.53745
ASHGA5P044577	0.00560447	0.0267639	2.14873	up	noncoding	ENST00000530600	RP11-661A12.5	GENCODE	498	chr8	-	144624142	144631899		ATGTGCAGTGCGCTGCCCTTCCGAACACCGGTGTGCACAGCAGGCGGTTTAGGTGACTCT	intergenic							19.8372	18.5069	4.75741	3.65393	19.5404	21.492	18.4792	17.5429	15.1394	22.8385	4.8459	4.5395	4.88684	3.49912	3.46641	3.99627
ASHGA5P057212	1.96309e-05	0.00170952	4.09729	up	noncoding	TCONS_00014653	XLOC_006743	LincRNAs identified by Cabili et al	376	chr8	+	23316672	23336893		AAAGCCAGACTAGTAAGTCAACATTCAGACATACAAGACGGAGATCACCATGCGAACCCA	intergenic							68.8936	28.2638	6.37498	4.34031	67.5853	80.5127	58.5828	28.0414	26.3698	30.3803	6.47733	6.24599	6.40163	4.25022	4.33437	4.43636
ASHGA5P045567	0.00012381	0.00358719	3.72297	up	noncoding	TCONS_00001785	XLOC_001174	LincRNAs identified by Cabili et al	626	chr1	-	207097099	207097924		TAGAGTGTGCACACACACACTCATAGCCACACACCACGCAGTGACACACACTCATAACTA	intergenic							129.148	52.3447	7.18192	5.28546	113.634	161.97	111.838	56.9147	55.0634	45.056	7.17132	7.12654	7.24789	5.33719	5.46935	5.04986
ASHGA5P049614	0.0127435	0.0449363	5.76846	up	noncoding	ENST00000582184	RP11-640N20.1	pseudogene	217	chr17	-	30330128	30330345	ENST00000335221, ENST00000584248, NM_182641	CAAAATTCTGGAAGAAATGCATGAAGAAATCCGACACATGGACATAACTGAAGACCTGAC								48.1072	14.2747	5.72872	3.20053	24.5772	85.1028	34.6416	14.6126	5	23.2115	5.14659	6.31172	5.72785	3.23347	2.34646	4.02166
ASHGA5P019035	0.00384985	0.0211227	2.96153	up	noncoding	ENST00000471091	RP11-2A4.3	GENCODE	433	chr3	+	137493385	137496438	ENST00000465283, ENST00000469216	TGTGCCTTAGATTTAGAATTCCACCCTCAGTTGGAATACAGATGATCCCTAACAAGTCAC	intergenic							588.676	244.243	9.19606	7.62971	643.72	543.34	578.967	254.977	254.5	223.251	9.44654	8.72662	9.41501	7.6211	7.82878	7.43927
ASHGA5P036467	0.00526251	0.025722	2.38181	up	noncoding	ENST00000420563	AC053503.4	GENCODE	1598	chr2	+	220253217	220268355		AGACGCACACACCACACAAATATTATTGTTCCTCAACAATTTACACATTCTGAAATTGGA	intronic antisense	ENST00000434339	DNPEP	aspartyl aminopeptidase [Source:HGNC Symbol;Acc:2981]	-	220250380	220264729	165.876	96.975	7.4543	6.20225	126.782	247.995	122.852	118.137	97.7076	75.0804	7.30807	7.67956	7.37528	6.43884	6.35457	5.81332
ASHGA5P036467	0.00526251	0.025722	2.38181	up	noncoding	ENST00000420563	AC053503.4	GENCODE	1598	chr2	+	220253217	220268355		AGACGCACACACCACACAAATATTATTGTTCCTCAACAATTTACACATTCTGAAATTGGA	intronic antisense	ENST00000457935	DNPEP	aspartyl aminopeptidase [Source:HGNC Symbol;Acc:2981]	-	220246719	220264744	165.876	96.975	7.4543	6.20225	126.782	247.995	122.852	118.137	97.7076	75.0804	7.30807	7.67956	7.37528	6.43884	6.35457	5.81332
ASHGA5P036467	0.00526251	0.025722	2.38181	up	noncoding	ENST00000420563	AC053503.4	GENCODE	1598	chr2	+	220253217	220268355		AGACGCACACACCACACAAATATTATTGTTCCTCAACAATTTACACATTCTGAAATTGGA	intronic antisense	ENST00000523282	DNPEP	aspartyl aminopeptidase [Source:HGNC Symbol;Acc:2981]	-	220238915	220264729	165.876	96.975	7.4543	6.20225	126.782	247.995	122.852	118.137	97.7076	75.0804	7.30807	7.67956	7.37528	6.43884	6.35457	5.81332
ASHGA5P036467	0.00526251	0.025722	2.38181	up	noncoding	ENST00000420563	AC053503.4	GENCODE	1598	chr2	+	220253217	220268355		AGACGCACACACCACACAAATATTATTGTTCCTCAACAATTTACACATTCTGAAATTGGA	natural antisense	ENST00000373972	DNPEP	aspartyl aminopeptidase [Source:HGNC Symbol;Acc:2981]	-	220238915	220253598	165.876	96.975	7.4543	6.20225	126.782	247.995	122.852	118.137	97.7076	75.0804	7.30807	7.67956	7.37528	6.43884	6.35457	5.81332
ASHGA5P036467	0.00526251	0.025722	2.38181	up	noncoding	ENST00000420563	AC053503.4	GENCODE	1598	chr2	+	220253217	220268355		AGACGCACACACCACACAAATATTATTGTTCCTCAACAATTTACACATTCTGAAATTGGA	natural antisense	ENST00000519905	DNPEP	aspartyl aminopeptidase [Source:HGNC Symbol;Acc:2981]	-	220251408	220264703	165.876	96.975	7.4543	6.20225	126.782	247.995	122.852	118.137	97.7076	75.0804	7.30807	7.67956	7.37528	6.43884	6.35457	5.81332
ASHGA5P034235	0.0019379	0.0141614	3.22606	up	noncoding	NR_038334	LOC100505715	RefSeq	2206	chr19	-	44395955	44405955		TGCTTTAATATAATTGTTTTATACTTTTACCCTTTATTCAGCAATAAATTATTTAATTTA	intergenic							379.041	152.728	8.60294	6.91317	421.925	412.375	302.822	152.05	174.571	131.564	8.88289	8.37005	8.55588	6.83102	7.25629	6.65219
ASHGA5P025777	0.00274245	0.0172335	2.56072	up	noncoding	NR_036523	MICA	RefSeq	2197	chr6	+	31367560	31383036	NR_036524	TCTGAGAGAGGGAAGTCGCCTCTGTGCTGAGCCCCACAGTCTTCGTTATAACCTCACGGT	exon sense-overlapping	NM_000247	MICA	MHC class I polypeptide-related sequence A isoform 1 (MICA*001) precursor	+	31371370	31383090	629.302	297.152	9.28424	7.92769	719.34	621.854	546.712	299.065	263.979	328.412	9.5963	8.91571	9.3407	7.86605	7.88111	8.0359
ASHGA5P025777	0.00274245	0.0172335	2.56072	up	noncoding	NR_036523	MICA	RefSeq	2197	chr6	+	31367560	31383036	NR_036524	TCTGAGAGAGGGAAGTCGCCTCTGTGCTGAGCCCCACAGTCTTCGTTATAACCTCACGGT	exon sense-overlapping	NM_001177519	MICA	MHC class I polypeptide-related sequence A isoform 2 (MICA*00801) precursor	+	31371370	31383090	629.302	297.152	9.28424	7.92769	719.34	621.854	546.712	299.065	263.979	328.412	9.5963	8.91571	9.3407	7.86605	7.88111	8.0359
ASHGA5P039967	0.000285438	0.00520502	3.37605	up	noncoding	TCONS_00022896	XLOC_011150	LincRNAs identified by Cabili et al	336	chr14	-	105491239	105493581		AGTATAAAAAGAGCCCCTGTATTGGTGCCTGCCTGGGCTGGCCTTCCGGAGGATGACAGA	intergenic							1241.29	418.352	10.2002	8.44486	1044.46	1792.53	886.892	471.467	393.691	389.898	10.1347	10.445	10.0209	8.56247	8.46781	8.30431
ASHGA5P037445	5.3296e-06	0.0011092	12.5238	up	noncoding	ENST00000455170	GCFC1-AS1	GENCODE	480	chr21	+	34102662	34109784		CATGAACCATTGTTTGGGGAAACAATTGATTACCTGTGGAGAAGAAAGACGTAAAATAAA	natural antisense	NM_016631	GCFC1	GC-rich sequence DNA-binding factor 1 isoform 1	-	34106209	34144169	56.5508	6.0745	6.12156	2.47496	54.4464	63.6839	51.5222	7.49341	5.73011	5	6.18369	5.94618	6.2348	2.57095	2.51114	2.34278
ASHGA5P041484	0.021712	0.0633624	7.68319	up	noncoding	uc003luo.1	AX747080	UCSC_knowngene	708	chr5	+	151167423	151168131		GAGGGGTTAAAAATTTGCAGGTACATATGCACATGACTATTAAGTGATAAAACAAGTCTC	intron sense-overlapping	NM_005754	G3BP1	ras GTPase-activating protein-binding protein 1	+	151151475	151184915	77.0085	11.1838	5.91775	2.97605	40.1583	174.245	16.6227	8.51978	17.5784	7.4534	5.79123	7.22258	4.73945	2.63265	3.69857	2.59692
ASHGA5P041484	0.021712	0.0633624	7.68319	up	noncoding	uc003luo.1	AX747080	UCSC_knowngene	708	chr5	+	151167423	151168131		GAGGGGTTAAAAATTTGCAGGTACATATGCACATGACTATTAAGTGATAAAACAAGTCTC	intron sense-overlapping	NM_198395	G3BP1	ras GTPase-activating protein-binding protein 1	+	151151475	151184915	77.0085	11.1838	5.91775	2.97605	40.1583	174.245	16.6227	8.51978	17.5784	7.4534	5.79123	7.22258	4.73945	2.63265	3.69857	2.59692
ASHGA5P014601	0.00113959	0.0103756	3.07028	up	noncoding	ENST00000411727	RP11-33A14.1	GENCODE	2100	chr3	-	178051326	178103184		CAATGACTTATTGTTGTTGTTTGTTTGTTTTGTCAGTAGAACCATGGAGAATTGCCAAGA	intronic antisense	ENST00000437510	KCNMB2	potassium large conductance calcium-activated channel, subfamily M, beta member 2 [Source:HGNC Symbol;Acc:6286]	+	177990719	178546150	434.779	176.984	8.75999	7.14161	324.118	577.338	402.882	188.947	190.762	151.243	8.52782	8.81574	8.93639	7.16784	7.39099	6.86601
ASHGA5P046500	0.00145503	0.0119199	6.04882	up	noncoding	ENST00000451126	CASK-AS1	GENCODE	515	chrX	+	41379288	41381589		ATAAATGTAGGTCACACTACAACTAGGTAGTCTCTAGGGACCATGACCTGCTGACACAAG	natural antisense	NM_001126054	CASK	peripheral plasma membrane protein CASK isoform 2	-	41374188	41782287	238.35	55.7072	7.9754	5.37875	285.477	196.176	233.398	59.7055	58.9211	48.4951	8.36317	7.36428	8.19875	5.40879	5.57501	5.15244
ASHGA5P046500	0.00145503	0.0119199	6.04882	up	noncoding	ENST00000451126	CASK-AS1	GENCODE	515	chrX	+	41379288	41381589		ATAAATGTAGGTCACACTACAACTAGGTAGTCTCTAGGGACCATGACCTGCTGACACAAG	natural antisense	NM_001126055	CASK	peripheral plasma membrane protein CASK isoform 3	-	41374188	41782287	238.35	55.7072	7.9754	5.37875	285.477	196.176	233.398	59.7055	58.9211	48.4951	8.36317	7.36428	8.19875	5.40879	5.57501	5.15244
ASHGA5P046500	0.00145503	0.0119199	6.04882	up	noncoding	ENST00000451126	CASK-AS1	GENCODE	515	chrX	+	41379288	41381589		ATAAATGTAGGTCACACTACAACTAGGTAGTCTCTAGGGACCATGACCTGCTGACACAAG	natural antisense	NM_003688	CASK	peripheral plasma membrane protein CASK isoform 1	-	41374188	41782287	238.35	55.7072	7.9754	5.37875	285.477	196.176	233.398	59.7055	58.9211	48.4951	8.36317	7.36428	8.19875	5.40879	5.57501	5.15244
ASHGA5P018246	0.00547962	0.0263594	2.91079	up	noncoding	ENST00000451164	AC079767.2	GENCODE	813	chr2	+	208462071	208464480		CGCATGCATAAAGATGAACAGAGTTTATGAAGGAGCATCATTCTAAGAATTAAGTGATGT	exon sense-overlapping	NM_004379	CREB1	cyclic AMP-responsive element-binding protein 1 isoform A	+	208394615	208470284	1206.69	499.71	10.2299	8.68848	1213.58	1374.72	1031.77	500.779	622.916	375.436	10.3613	10.0754	10.2529	8.65196	9.17311	8.24038
ASHGA5P018246	0.00547962	0.0263594	2.91079	up	noncoding	ENST00000451164	AC079767.2	GENCODE	813	chr2	+	208462071	208464480		CGCATGCATAAAGATGAACAGAGTTTATGAAGGAGCATCATTCTAAGAATTAAGTGATGT	exon sense-overlapping	NM_134442	CREB1	cyclic AMP-responsive element-binding protein 1 isoform B	+	208394615	208470284	1206.69	499.71	10.2299	8.68848	1213.58	1374.72	1031.77	500.779	622.916	375.436	10.3613	10.0754	10.2529	8.65196	9.17311	8.24038
ASHGA5P042519	0.00983536	0.0381554	2.1828	up	noncoding	ENST00000443221	RP11-250B2.3	GENCODE	758	chr6	+	81153172	81172924		TTCGAATTATCTGTTATGAATTGTGGTTTTGTTATTAAATAGACATTTTGTTTAATTCTT	intergenic							1082.4	583.691	10.067	8.94079	1134.8	1163.89	948.494	547.252	702.381	501.439	10.2574	9.81072	10.1328	8.78321	9.3452	8.69395
ASHGA5P052064	0.00137307	0.0115858	4.41034	up	noncoding	uc003ifc.3	LOC285419	UCSC_knowngene	6506	chr4	+	124571421	124589231		TGTTTAACTATCTCCCTTGAACTATGGCCTGTAGGATTCTGCCTGCTTTCTAGTCCTTTT	intergenic							3171.15	764.215	11.4911	9.35016	2439.69	5122.05	1951.71	782.352	655.992	854.301	11.3083	12.0064	11.1585	9.31723	9.25078	9.48248
ASHGA5P050279	0.00450858	0.0234527	2.09904	up	noncoding	uc021uyg.1	GQ868703	UCSC_knowngene	277	chr19	-	51288984	51289467		AAAGAGAGAGAAGACCAACCAAGGGGTGGCTGGAGTCCCAAGGCCATGAACTTTCAGGAA	intergenic							12.4181	12.212	4.10331	3.03358	12.8114	15.6488	8.79415	15.6227	10.0345	10.9788	4.27857	4.12901	3.90235	3.33323	2.86732	2.90019
ASHGA5P058606	0.0017592	0.0132997	2.48733	up	noncoding	uc010vzg.1	AK295707	UCSC_knowngene	368	chr17	+	20318817	20319997	NR_003190	TGATCACAGGCAAGGCAAAGGAAAATGACAGGCCCTTGCCTTCCCGGTCCTCAAGGGTCA	intergenic							79.5776	51.3	6.57571	5.26111	74.1127	83.7916	80.8286	51.1841	53.4003	49.3156	6.60029	6.29146	6.83537	5.17935	5.42322	5.18074
ASHGA5P036880	0.000875194	0.00909648	2.87479	up	noncoding	ENST00000435412	C20orf90	GENCODE	332	chr20	-	61326375	61331832		TTGGAGTTGGAGCAGGAAGCTGAGGGTCTTGTCATGCCCGCCCTTCCTTCCACGTGGCTC	intergenic							421.455	188.051	8.75893	7.23547	424.398	434.722	405.247	210.375	174.734	179.045	8.88936	8.44319	8.94423	7.33222	7.25829	7.11589
ASHGA5P022559	0.000898731	0.00923297	2.5102	up	noncoding	ENST00000558781	RP11-279F6.1	GENCODE	1222	chr15	+	69850530	69863422		TCTTGAAAGGAGGTCTTTGCCTAACAGAAATGGAATAAAAAGGCCTACCTCATTGGGCTC	intergenic							13.6996	10.8881	4.22715	2.89935	10.1324	18.5739	12.3926	10.1932	10.8801	11.5911	3.9678	4.35217	4.36147	2.74892	2.96827	2.98086
ASHGA5P022553	0.00823786	0.0342392	2.18389	up	noncoding	ENST00000558730	RP11-26L20.3	GENCODE	763	chr16	-	55293880	55367500		ATAATAATTGATCCAGAGAAAAGGAAAGAAGAATGGACTTGAAACCCTCCTGAGGCTCTA	intronic antisense	NM_024335	IRX6	iroquois-class homeodomain protein IRX-6	+	55358470	55364672	17.7132	16.5182	4.60588	3.47898	17.8499	19.2529	16.0366	20.946	16.0894	12.5193	4.72835	4.39827	4.69101	3.78847	3.56157	3.08691
ASHGA5P047794	0.0019963	0.0144191	2.48038	up	noncoding	ENST00000526612	RP11-326C3.7	GENCODE	392	chr11	-	310138	311141		ATGCACAGAGGCTGGAAGGGGCAGTGCAGGGGCTGACCAACCTGCTCATGAAAGGAGGGT	intronic antisense	ENST00000399815	IFITM2	interferon induced transmembrane protein 2 [Source:HGNC Symbol;Acc:5413]	+	308407	315272	51.9293	34.5753	5.95147	4.64091	37.5756	75.7574	42.455	35.7838	28.176	39.7662	5.70393	6.16666	5.98382	4.62979	4.43284	4.86009
ASHGA5P042994	0.015606	0.051139	2.01402	up	noncoding	uc010kwx.1	AAA1	UCSC_knowngene	506	chr7	-	34743465	34800803		GCGCCAAAAAATATGTTTTCTTTCTTTTCTTTGTTGAACACTCATCGGGAGTTACTCTTA	intronic antisense	NM_207172	NPSR1	neuropeptide S receptor isoform A	+	34697896	34889590	13.2019	13.3627	4.1771	3.16702	10.9093	17.8957	10.8007	17.2232	13.9082	8.95655	4.06364	4.30291	4.16474	3.47099	3.33723	2.69283
ASHGA5P042994	0.015606	0.051139	2.01402	up	noncoding	uc010kwx.1	AAA1	UCSC_knowngene	506	chr7	-	34743465	34800803		GCGCCAAAAAATATGTTTTCTTTCTTTTCTTTGTTGAACACTCATCGGGAGTTACTCTTA	intronic antisense	NM_207173	NPSR1	neuropeptide S receptor isoform B	+	34697896	34917944	13.2019	13.3627	4.1771	3.16702	10.9093	17.8957	10.8007	17.2232	13.9082	8.95655	4.06364	4.30291	4.16474	3.47099	3.33723	2.69283
ASHGA5P051824	0.000682552	0.00793986	8.2452	up	noncoding	ENST00000420064	RP11-175P19.2	pseudogene	602	chr3	-	193296600	193297202		TGCCCTTCTGCCTTACACACAGGGTGTGAAAAAACTAATTGTTGGAGTTGACAAAATGGA								27874.6	4040.08	14.7881	11.7446	19849.5	40517.7	23256.4	4949.92	3060.81	4109.52	14.3221	15.2798	14.7625	11.9901	11.4421	11.8015
ASHGA5P043652	0.00168644	0.0129991	4.46526	up	noncoding	ENST00000436266	AC092657.2	GENCODE	239	chr7	+	46341717	46383219		ATGGTGTCACTACTTGCAAGCTGTGAGTCTGTTTTGAGAACTCTCTCCATCTCTCCAAAT	intergenic							1206.53	334.123	10.2259	8.06713	1075.86	1465.22	1078.51	382.138	386.457	233.774	10.177	10.1755	10.3252	8.24373	8.44511	7.51256
ASHGA5P023632	0.00104165	0.00988842	3.06757	up	noncoding	HMlincRNA1179+	HMlincRNA1179	LincRNAs identified by Khalil et al	5414	chr7	+	152737017	152742431		AGCTAGGCTTTGGAATGGAGCTGGGAAATGACTAATGTGTTTTCTGTCCATCCAGAGTTA	intergenic							23.4686	14.2776	4.89989	3.2828	21.7417	33.9649	14.6992	13.9143	14.995	13.9236	4.98119	5.14138	4.57711	3.15649	3.45354	3.23837
ASHGA5P029940	0.00407874	0.0219812	2.48773	up	noncoding	TCONS_00016214	XLOC_007607	LincRNAs identified by Cabili et al	310	chr9	+	138307019	138307423		TTCCCATCAAGACGTGGGGTCTGTACCCCCTACCCACACTGACCCTCTTCCCATCGAGAG	intergenic							1019.15	481.906	9.97567	8.66084	1131.91	979.621	945.93	536.802	445.967	462.948	10.2518	9.5509	10.1243	8.75458	8.659	8.56893
ASHGA5P028678	0.00484214	0.0244328	2.0291	up	noncoding	ENST00000426991	ANKRD10-IT1	GENCODE	380	chr13	-	111547405	111551519		GTAGCTTCTCATTTCTCTGTTTCTTGATTTTGGAGAGCAAGTCTATGCTTATCTATAGAA	intron sense-overlapping	NM_017664	ANKRD10	ankyrin repeat domain-containing protein 10	-	111530886	111567416	107.581	79.9496	6.9605	5.93966	118.808	114.886	89.0493	85.7868	81.4365	72.6255	7.22811	6.69242	6.96097	5.96956	6.08476	5.76466
ASHGA5P041184	0.00577409	0.0272723	2.85661	up	noncoding	uc003kex.3	LOC728723	UCSC_knowngene	1298	chr5	+	76383261	76401215		GTGTTTTTTTGGTTTTTGGTTTTGGTTTGAGTGAATCTTTTTGCAAAACATTTTAGACAT	bidirectional	NM_032367	ZBED3	zinc finger BED domain-containing protein 3	-	76372531	76383030	219.442	100.934	7.78342	6.26912	138.337	353.061	166.929	116.331	107.057	79.4143	7.4228	8.1544	7.77306	6.41564	6.49217	5.89953
ASHGA5P039191	0.00103483	0.00988362	11.5038	up	noncoding	ENST00000416648	RP11-315J22.5	pseudogene	895	chr3	+	183605342	183606237	ENST00000445165	AGAAAAGTGATGGCGTCTACATCCTACATCTGAAGAGGACCTGGGAGAAGCAAGAAGTTT								3312.94	342.305	11.5847	8.06063	2229.42	5033.93	2675.46	343.611	198.62	484.685	11.1915	11.982	11.5805	8.08789	7.45136	8.64264
ASHGA5P050776	0.00316889	0.0187468	2.28649	up	noncoding	uc002vbb.3	BC047484	UCSC_knowngene	1221	chr2	+	206950355	206951576		TTAGTGACAGTGATATTTTAATATTTTTTTAAGCCAGTAATAATTTTTCTCCATTACAGG	natural antisense	NM_017759	INO80D	INO80 complex subunit D	-	206858444	206950906	2498.59	1251.47	11.252	10.0588	2607.91	2564.24	2323.63	1149.49	1387.44	1217.48	11.3962	10.9793	11.3804	9.88281	10.3117	9.98201
ASHGA5P058638	0.000963701	0.00954685	2.44353	up	noncoding	uc021tba.1	HM587425	UCSC_knowngene	196	chr16	+	3050086	3050814		CCACAGCCAGGGCAGGCCGGGGTGCTGTGGAACTCTCGCTGGCCCACCCTCCAGGCCTGG	intergenic							262.14	144.104	8.12032	6.83135	250.895	277.649	257.875	148.839	137.579	145.894	8.18828	7.84052	8.33216	6.80172	6.88354	6.80879
ASHGA5P022565	0.00438068	0.0230307	2.55226	up	noncoding	ENST00000558842	RP11-346C20.1	GENCODE	240	chr16	-	73092779	73093121		TTATTGATCCAGAAGGTGGCTAATTAGCCCTTCCCGTCGTGCCTGGCTCCCACTTCCAGC	exon sense-overlapping	ENST00000397992	ZFHX3	zinc finger homeobox 3 [Source:HGNC Symbol;Acc:777]	-	72816783	73093597	337.305	172.584	8.45438	7.1026	377.945	330.12	303.851	196.029	169.684	152.041	8.73959	8.06243	8.56111	7.22243	7.21216	6.87322
ASHGA5P054751	0.000578867	0.00737877	3.6087	up	noncoding	TCONS_00007982	XLOC_003453	LincRNAs identified by Cabili et al	815	chr4	+	10739198	10743736		CTGCAATGATTTACGTGACTCTACAGATCCTGGCCCCTGTGGGTATCACCTCCCACCTCT	intergenic							1533.53	506.312	10.5753	8.72381	1576.81	1575.44	1448.35	596.686	419.998	502.252	10.7258	10.2617	10.7384	8.91108	8.56434	8.696
ASHGA5P027509	0.0229753	0.0658528	2.07217	up	noncoding	ENST00000550548	RP11-1016B18.1	GENCODE	2945	chr12	-	98123825	98150295		GAGATTCAGAGTCATGCTAAGACAGAATTTCAATGCTTACATTGTTCTCCTCAAAGATAA	intergenic							9.19961	8.5214	3.6879	2.63676	11.8575	10.2191	5.52224	10.6399	5	9.92429	4.17414	3.57383	3.31574	2.79264	2.34646	2.77117
ASHGA5P019155	0.00016666	0.00410257	4.50428	up	noncoding	NR_047553	UBE2V1	RefSeq	2593	chr20	-	48697660	48732496	NR_047556	GCCTCCAAGATTTCAGTTTATATATTTGAACCCCCTCTGATGCTGTTTAACCCCTCTAAA	exon sense-overlapping	NM_001032288	UBE2V1	ubiquitin-conjugating enzyme E2 variant 1 isoform d	-	48697660	48729735	19214.5	5097.95	14.2635	12.0922	20575.5	18528.1	18539.8	5375.82	5398.84	4519.18	14.3786	13.9948	14.4169	12.1154	12.2254	11.9357
ASHGA5P019155	0.00016666	0.00410257	4.50428	up	noncoding	NR_047553	UBE2V1	RefSeq	2593	chr20	-	48697660	48732496	NR_047556	GCCTCCAAGATTTCAGTTTATATATTTGAACCCCCTCTGATGCTGTTTAACCCCTCTAAA	exon sense-overlapping	NM_001257393	UBE2V1	ubiquitin-conjugating enzyme E2 variant 1 isoform a	-	48697660	48732496	19214.5	5097.95	14.2635	12.0922	20575.5	18528.1	18539.8	5375.82	5398.84	4519.18	14.3786	13.9948	14.4169	12.1154	12.2254	11.9357
ASHGA5P019155	0.00016666	0.00410257	4.50428	up	noncoding	NR_047553	UBE2V1	RefSeq	2593	chr20	-	48697660	48732496	NR_047556	GCCTCCAAGATTTCAGTTTATATATTTGAACCCCCTCTGATGCTGTTTAACCCCTCTAAA	exon sense-overlapping	NM_001257394	UBE2V1	ubiquitin-conjugating enzyme E2 variant 1 isoform c	-	48697660	48732496	19214.5	5097.95	14.2635	12.0922	20575.5	18528.1	18539.8	5375.82	5398.84	4519.18	14.3786	13.9948	14.4169	12.1154	12.2254	11.9357
ASHGA5P019155	0.00016666	0.00410257	4.50428	up	noncoding	NR_047553	UBE2V1	RefSeq	2593	chr20	-	48697660	48732496	NR_047556	GCCTCCAAGATTTCAGTTTATATATTTGAACCCCCTCTGATGCTGTTTAACCCCTCTAAA	exon sense-overlapping	NM_001257395	UBE2V1	ubiquitin-conjugating enzyme E2 variant 1 isoform e	-	48697660	48729735	19214.5	5097.95	14.2635	12.0922	20575.5	18528.1	18539.8	5375.82	5398.84	4519.18	14.3786	13.9948	14.4169	12.1154	12.2254	11.9357
ASHGA5P019155	0.00016666	0.00410257	4.50428	up	noncoding	NR_047553	UBE2V1	RefSeq	2593	chr20	-	48697660	48732496	NR_047556	GCCTCCAAGATTTCAGTTTATATATTTGAACCCCCTCTGATGCTGTTTAACCCCTCTAAA	exon sense-overlapping	NM_001257396	UBE2V1	ubiquitin-conjugating enzyme E2 variant 1 isoform f	-	48697660	48729735	19214.5	5097.95	14.2635	12.0922	20575.5	18528.1	18539.8	5375.82	5398.84	4519.18	14.3786	13.9948	14.4169	12.1154	12.2254	11.9357
ASHGA5P019155	0.00016666	0.00410257	4.50428	up	noncoding	NR_047553	UBE2V1	RefSeq	2593	chr20	-	48697660	48732496	NR_047556	GCCTCCAAGATTTCAGTTTATATATTTGAACCCCCTCTGATGCTGTTTAACCCCTCTAAA	exon sense-overlapping	NM_001257397	UBE2V1	ubiquitin-conjugating enzyme E2 variant 1 isoform g	-	48697660	48729735	19214.5	5097.95	14.2635	12.0922	20575.5	18528.1	18539.8	5375.82	5398.84	4519.18	14.3786	13.9948	14.4169	12.1154	12.2254	11.9357
ASHGA5P019155	0.00016666	0.00410257	4.50428	up	noncoding	NR_047553	UBE2V1	RefSeq	2593	chr20	-	48697660	48732496	NR_047556	GCCTCCAAGATTTCAGTTTATATATTTGAACCCCCTCTGATGCTGTTTAACCCCTCTAAA	exon sense-overlapping	NM_001257398	UBE2V1	ubiquitin-conjugating enzyme E2 variant 1 isoform g	-	48697660	48729735	19214.5	5097.95	14.2635	12.0922	20575.5	18528.1	18539.8	5375.82	5398.84	4519.18	14.3786	13.9948	14.4169	12.1154	12.2254	11.9357
ASHGA5P019155	0.00016666	0.00410257	4.50428	up	noncoding	NR_047553	UBE2V1	RefSeq	2593	chr20	-	48697660	48732496	NR_047556	GCCTCCAAGATTTCAGTTTATATATTTGAACCCCCTCTGATGCTGTTTAACCCCTCTAAA	exon sense-overlapping	NM_001257399	UBE2V1	ubiquitin-conjugating enzyme E2 variant 1 isoform g	-	48697660	48729735	19214.5	5097.95	14.2635	12.0922	20575.5	18528.1	18539.8	5375.82	5398.84	4519.18	14.3786	13.9948	14.4169	12.1154	12.2254	11.9357
ASHGA5P019155	0.00016666	0.00410257	4.50428	up	noncoding	NR_047553	UBE2V1	RefSeq	2593	chr20	-	48697660	48732496	NR_047556	GCCTCCAAGATTTCAGTTTATATATTTGAACCCCCTCTGATGCTGTTTAACCCCTCTAAA	exon sense-overlapping	NM_021988	UBE2V1	ubiquitin-conjugating enzyme E2 variant 1 isoform a	-	48697660	48732496	19214.5	5097.95	14.2635	12.0922	20575.5	18528.1	18539.8	5375.82	5398.84	4519.18	14.3786	13.9948	14.4169	12.1154	12.2254	11.9357
ASHGA5P019155	0.00016666	0.00410257	4.50428	up	noncoding	NR_047553	UBE2V1	RefSeq	2593	chr20	-	48697660	48732496	NR_047556	GCCTCCAAGATTTCAGTTTATATATTTGAACCCCCTCTGATGCTGTTTAACCCCTCTAAA	exon sense-overlapping	NM_022442	UBE2V1	ubiquitin-conjugating enzyme E2 variant 1 isoform c	-	48697660	48732496	19214.5	5097.95	14.2635	12.0922	20575.5	18528.1	18539.8	5375.82	5398.84	4519.18	14.3786	13.9948	14.4169	12.1154	12.2254	11.9357
ASHGA5P019155	0.00016666	0.00410257	4.50428	up	noncoding	NR_047553	UBE2V1	RefSeq	2593	chr20	-	48697660	48732496	NR_047556	GCCTCCAAGATTTCAGTTTATATATTTGAACCCCCTCTGATGCTGTTTAACCCCTCTAAA	exon sense-overlapping	NM_199144	UBE2V1	ubiquitin-conjugating enzyme E2 variant 1 isoform a	-	48697660	48732496	19214.5	5097.95	14.2635	12.0922	20575.5	18528.1	18539.8	5375.82	5398.84	4519.18	14.3786	13.9948	14.4169	12.1154	12.2254	11.9357
ASHGA5P019155	0.00016666	0.00410257	4.50428	up	noncoding	NR_047553	UBE2V1	RefSeq	2593	chr20	-	48697660	48732496	NR_047556	GCCTCCAAGATTTCAGTTTATATATTTGAACCCCCTCTGATGCTGTTTAACCCCTCTAAA	exon sense-overlapping	NM_199203	TMEM189-UBE2V1	TMEM189-UBE2V1 fusion protein	-	48697660	48770335	19214.5	5097.95	14.2635	12.0922	20575.5	18528.1	18539.8	5375.82	5398.84	4519.18	14.3786	13.9948	14.4169	12.1154	12.2254	11.9357
ASHGA5P052148	0.00219759	0.0152201	2.23456	up	noncoding	ENST00000507869	AC108142.1	GENCODE	2129	chr4	-	182896308	183006289		CTTCCTCTTCCTCTTTCTTTATGGATGGCAAACAGCGTTCAGATGACAGATTTTGGAAAA	intergenic							909.233	459.782	9.74638	8.58639	811.304	1300.01	616.387	524.895	432.406	422.044	9.76725	9.97917	9.49272	8.72413	8.61121	8.42384
ASHGA5P053500	0.00380394	0.0209777	2.34498	up	noncoding	ENST00000510185	KB-1608C10.2	GENCODE	502	chr8	-	95804459	95805334	ENST00000518613	GAATCAATATCATATATCTTATTCAAGGTAAATTTTATGTTAGATTCTTTGTCTGGCATT	natural antisense	NM_181787	DPY19L4	protein dpy-19 homolog 4	+	95732102	95806076	50.4281	35.6804	5.91668	4.68711	36.5222	73.5846	41.1774	42.5068	35.0286	29.5059	5.66695	6.13691	5.94618	4.89197	4.77766	4.39168
ASHGA5P031713	0.00367191	0.0205307	2.42001	up	noncoding	uc002edk.1	IGH	UCSC_knowngene	88	chr16	+	33013796	33013884	ENST00000561990, ENST00000567363, uc002ecv.1, uc021sff.1, uc021thj.1	GTGAAGAAGCCTGGGGCCTCAGTGAAGGTCTCCTGCCAGGCTTCTGGATACACCTTCACC	intergenic							36.6568	27.4443	5.55729	4.28227	31.1062	43.6075	35.2567	26.5627	32.2685	23.5018	5.45179	5.46857	5.7515	4.16399	4.64565	4.03717
ASHGA5P035584	0.000160862	0.00404599	16.4654	up	noncoding	ENST00000431827	AC053503.6	GENCODE	224	chr2	-	220289792	220290906		GACCACGAGGGATGGCCAGTGAGGAGGGGTCAGAGGCTGTGAGGGGAGGACTGAGGCTGG	natural antisense	NM_001927	DES	desmin	+	220283098	220291461	106.499	9.25457	6.81339	2.77203	91.735	170.375	57.3885	6.94783	8.12723	12.6886	6.87034	7.19312	6.37671	2.53657	2.67178	3.10772
ASHGA5P040152	0.0188382	0.0577341	2.09078	up	noncoding	uc003ijl.3	BC029578	UCSC_knowngene	1301	chr4	+	144833483	144903605		GGGAGAGAGTATTGGAAGAATATATGCAAATACAATGTGATAATGTGATGTCTTTGTGAG	intergenic							33.709	29.5237	5.45959	4.39555	35.5572	31.7733	33.7963	30.5456	34.006	24.0195	5.62787	5.05447	5.69644	4.38834	4.72917	4.06914
ASHGA5P056278	9.10457e-05	0.00317638	4.8996	up	noncoding	TCONS_00001701	XLOC_001061	LincRNAs identified by Cabili et al	602	chr1	-	159746263	159749163	TCONS_00001700, TCONS_00001702, TCONS_00002502	AATTAATAAGAAGAATGCATTGGCAAGACCGTGAAGAAGGCCTGCCATGGGAAGCTTTGG	intergenic							42.8048	16.2787	5.77011	3.47745	41.2342	44.8346	42.3457	16.8809	14.906	17.0492	5.82425	5.50547	5.98061	3.44258	3.44309	3.54667
ASHGA5P027339	4.64829e-05	0.00242179	14.1359	up	noncoding	ENST00000554053	RP11-973D8.3	GENCODE	306	chr12	-	56347468	56347884		ATTCAGATGAGGCACTTTCAATGTATGTGTTTTGGGGTGTGTGTATGTGTGTGCGCATGG	natural antisense	NM_001345	DGKA	diacylglycerol kinase alpha	+	56324945	56347807	8062.19	663.324	12.9642	9.14287	6323.05	9217.98	8645.54	744.823	647.241	597.908	12.6709	12.9331	13.2885	9.24411	9.23124	8.95326
ASHGA5P027339	4.64829e-05	0.00242179	14.1359	up	noncoding	ENST00000554053	RP11-973D8.3	GENCODE	306	chr12	-	56347468	56347884		ATTCAGATGAGGCACTTTCAATGTATGTGTTTTGGGGTGTGTGTATGTGTGTGCGCATGG	natural antisense	NM_201444	DGKA	diacylglycerol kinase alpha	+	56325811	56347807	8062.19	663.324	12.9642	9.14287	6323.05	9217.98	8645.54	744.823	647.241	597.908	12.6709	12.9331	13.2885	9.24411	9.23124	8.95326
ASHGA5P027339	4.64829e-05	0.00242179	14.1359	up	noncoding	ENST00000554053	RP11-973D8.3	GENCODE	306	chr12	-	56347468	56347884		ATTCAGATGAGGCACTTTCAATGTATGTGTTTTGGGGTGTGTGTATGTGTGTGCGCATGG	natural antisense	NM_201445	DGKA	diacylglycerol kinase alpha	+	56325811	56347807	8062.19	663.324	12.9642	9.14287	6323.05	9217.98	8645.54	744.823	647.241	597.908	12.6709	12.9331	13.2885	9.24411	9.23124	8.95326
ASHGA5P027339	4.64829e-05	0.00242179	14.1359	up	noncoding	ENST00000554053	RP11-973D8.3	GENCODE	306	chr12	-	56347468	56347884		ATTCAGATGAGGCACTTTCAATGTATGTGTTTTGGGGTGTGTGTATGTGTGTGCGCATGG	natural antisense	NM_201554	DGKA	diacylglycerol kinase alpha	+	56325811	56347807	8062.19	663.324	12.9642	9.14287	6323.05	9217.98	8645.54	744.823	647.241	597.908	12.6709	12.9331	13.2885	9.24411	9.23124	8.95326
ASHGA5P014564	0.00694501	0.0306808	2.03835	up	noncoding	ENST00000449178	PCBP1-AS1	GENCODE	539	chr2	-	70259016	70313405	ENST00000411429, ENST00000413791, ENST00000415222, ENST00000416068, ENST00000418308, ENST00000418564, ENST00000419963, ENST00000420309, ENST00000422515, ENST00000425333, ENST00000425601, ENST00000437456, ENST00000439892, ENST00000444320, ENST00000457770, ENST00000458698	TGGTCTGAAGAGGAAGACAAACATAAAGATGAAGTGCTTAATTCAAGGTCACACAATGTC	intergenic							66.8948	51.8377	6.29066	5.26326	45.9705	92.377	62.3367	49.8119	44.7299	60.9715	5.96816	6.41719	6.48663	5.13728	5.15227	5.50022
ASHGA5P045277	0.000954797	0.00950386	3.6821	up	noncoding	ENST00000447954	RP5-857K21.4	GENCODE	336	chr1	-	655437	659930	ENST00000428915, ENST00000431812, ENST00000436899, ENST00000437691, ENST00000453576, ENST00000529266, NR_024368, NR_040415	GTGACTCTCGGGCAGAAGCAGTGGTGGGGCAGCCAGGGCAGCGTCAAGAGTCTGAGCCAG	intergenic							358.709	129.593	8.50132	6.62079	307.992	486.092	282.042	174.005	97.0283	117.746	8.46095	8.59027	8.45274	7.03521	6.34338	6.48377
ASHGA5P012678	0.000534947	0.00707382	2.48919	up	noncoding	ENST00000379899	AC004790.2	GENCODE	3103	chr19	+	16133467	16138723	ENST00000552685, uc002nca.3, uc002ncb.1	AAGGCAGGAGTGTGTGCCCTGCTTTTGCCCTCGAAGCTCGCTGAAGGGGACCCATCTCTG	intron sense-overlapping	ENST00000397365	AC004790.1		+	16124066	16152945	284.413	152.232	8.22585	6.91018	258.769	322.456	272.013	168.199	147.045	141.452	8.23502	8.03656	8.40599	6.98605	6.98235	6.76214
ASHGA5P047808	0.000923127	0.00934331	2.39547	up	noncoding	ENST00000506172	RP11-1391J7.1	GENCODE	2061	chr11	-	856879	859795		ATGCATGAACCTGAGACGTGTGAGTCAAGTTGTGTGTGAGCCCGGGATGCATGGGAGCTG	intronic antisense	NM_001025234	TSPAN4	tetraspanin-4 isoform a	+	844080	867116	42.01	31.1521	5.74562	4.48531	40.223	45.2679	40.5392	35.7805	28.6357	29.0401	5.79352	5.5161	5.92725	4.62958	4.45851	4.36784
ASHGA5P047808	0.000923127	0.00934331	2.39547	up	noncoding	ENST00000506172	RP11-1391J7.1	GENCODE	2061	chr11	-	856879	859795		ATGCATGAACCTGAGACGTGTGAGTCAAGTTGTGTGTGAGCCCGGGATGCATGGGAGCTG	intronic antisense	NM_001025235	TSPAN4	tetraspanin-4 isoform a	+	842940	867116	42.01	31.1521	5.74562	4.48531	40.223	45.2679	40.5392	35.7805	28.6357	29.0401	5.79352	5.5161	5.92725	4.62958	4.45851	4.36784
ASHGA5P047808	0.000923127	0.00934331	2.39547	up	noncoding	ENST00000506172	RP11-1391J7.1	GENCODE	2061	chr11	-	856879	859795		ATGCATGAACCTGAGACGTGTGAGTCAAGTTGTGTGTGAGCCCGGGATGCATGGGAGCTG	intronic antisense	NM_001025236	TSPAN4	tetraspanin-4 isoform a	+	842940	867116	42.01	31.1521	5.74562	4.48531	40.223	45.2679	40.5392	35.7805	28.6357	29.0401	5.79352	5.5161	5.92725	4.62958	4.45851	4.36784
ASHGA5P047808	0.000923127	0.00934331	2.39547	up	noncoding	ENST00000506172	RP11-1391J7.1	GENCODE	2061	chr11	-	856879	859795		ATGCATGAACCTGAGACGTGTGAGTCAAGTTGTGTGTGAGCCCGGGATGCATGGGAGCTG	intronic antisense	NM_001025237	TSPAN4	tetraspanin-4 isoform a	+	844445	867116	42.01	31.1521	5.74562	4.48531	40.223	45.2679	40.5392	35.7805	28.6357	29.0401	5.79352	5.5161	5.92725	4.62958	4.45851	4.36784
ASHGA5P047808	0.000923127	0.00934331	2.39547	up	noncoding	ENST00000506172	RP11-1391J7.1	GENCODE	2061	chr11	-	856879	859795		ATGCATGAACCTGAGACGTGTGAGTCAAGTTGTGTGTGAGCCCGGGATGCATGGGAGCTG	intronic antisense	NM_001025238	TSPAN4	tetraspanin-4 isoform a	+	842823	867116	42.01	31.1521	5.74562	4.48531	40.223	45.2679	40.5392	35.7805	28.6357	29.0401	5.79352	5.5161	5.92725	4.62958	4.45851	4.36784
ASHGA5P047808	0.000923127	0.00934331	2.39547	up	noncoding	ENST00000506172	RP11-1391J7.1	GENCODE	2061	chr11	-	856879	859795		ATGCATGAACCTGAGACGTGTGAGTCAAGTTGTGTGTGAGCCCGGGATGCATGGGAGCTG	intronic antisense	NM_001025239	TSPAN4	tetraspanin-4 isoform b	+	842823	867116	42.01	31.1521	5.74562	4.48531	40.223	45.2679	40.5392	35.7805	28.6357	29.0401	5.79352	5.5161	5.92725	4.62958	4.45851	4.36784
ASHGA5P047808	0.000923127	0.00934331	2.39547	up	noncoding	ENST00000506172	RP11-1391J7.1	GENCODE	2061	chr11	-	856879	859795		ATGCATGAACCTGAGACGTGTGAGTCAAGTTGTGTGTGAGCCCGGGATGCATGGGAGCTG	intronic antisense	NM_003271	TSPAN4	tetraspanin-4 isoform a	+	842823	867116	42.01	31.1521	5.74562	4.48531	40.223	45.2679	40.5392	35.7805	28.6357	29.0401	5.79352	5.5161	5.92725	4.62958	4.45851	4.36784
ASHGA5P045374	0.000113332	0.00345962	11.7284	up	noncoding	ENST00000413801	RP11-80B9.1	GENCODE	572	chr1	+	240928856	240931980		GTAGGTTTTCCGGGTTTTTCTTATAAATCAAGATGAGGCAATAGGTAAGAGTCATGAAAA	natural antisense	ENST00000331110	RGS7	regulator of G-protein signaling 7 [Source:HGNC Symbol;Acc:10003]	-	240931553	241307868	91.8161	13.5207	6.74056	3.18862	98.6426	105.2	71.6056	13.2745	16.3011	10.9866	6.97475	6.58107	6.66586	3.08262	3.58155	2.90169
ASHGA5P042304	0.0116805	0.0426939	2.36936	up	noncoding	NR_026775	LINC00240	RefSeq	983	chr6	+	26924771	26991753		CTCTGTCATTCTCTGTCAAAATTGTAAAATCATAAGCAAATAAATAATCACAGTTGCTTC	intergenic							51.3019	37.2964	5.9971	4.7526	57.8401	49.7148	46.3509	40.637	42.3305	28.9217	6.26634	5.62754	6.09742	4.82342	5.07292	4.36147
ASHGA5P015982	0.00156521	0.0124711	2.64093	up	noncoding	ENST00000425399	AC131180.4	pseudogene	584	chr2	+	132054415	132066641	ENST00000413041, ENST00000425151, ENST00000432061, ENST00000447059, NR_046258, NR_046259	CAGTTCACAGACCTAAGTCAATGTTAGTCTACTACTGTACATCTGGTAACCTCAATCCCT								988.157	436.11	9.89093	8.48989	805.34	1382.25	776.879	544.848	385.68	377.801	9.75635	10.0848	9.8316	8.77687	8.44188	8.25092
ASHGA5P034298	0.000117899	0.00352041	5.22907	up	noncoding	ENST00000531692	NAPSB	GENCODE	561	chr19	-	50837052	50837818		CGGACGGGATTTGAGCAGAGCAGGAATCTCCCATCTTCACTTGTTCCTCTCCTCCACCAG	intronic antisense	ENST00000542413	NR1H2	nuclear receptor subfamily 1, group H, member 2 [Source:HGNC Symbol;Acc:7965]	+	50832948	50886218	4356.52	924.248	12.0192	9.63267	4595.17	5557.32	2917.05	986.212	880.382	906.151	12.2203	12.1255	11.7119	9.66356	9.67254	9.56191
ASHGA5P054177	0.000717396	0.00816199	3.65889	up	noncoding	ENST00000562749	RP11-66N11.8	GENCODE	554	chrX	+	152864794	152865348		CGACACCACGGGGCGGCTGGTATGTGTCCACCGGCCCCTAGGCGCCTCGAGCCCCGCCCC	bidirectional	NM_001130997	FAM58A	cyclin-related protein FAM58A isoform 2	-	152853382	152864632	49.0285	23.88	5.94028	4.06888	49.6458	53.4619	43.9777	21.4768	27.4541	22.709	6.06822	5.72489	6.02772	3.82897	4.39094	3.98672
ASHGA5P054177	0.000717396	0.00816199	3.65889	up	noncoding	ENST00000562749	RP11-66N11.8	GENCODE	554	chrX	+	152864794	152865348		CGACACCACGGGGCGGCTGGTATGTGTCCACCGGCCCCTAGGCGCCTCGAGCCCCGCCCC	bidirectional	NM_152274	FAM58A	cyclin-related protein FAM58A isoform 1	-	152853382	152864632	49.0285	23.88	5.94028	4.06888	49.6458	53.4619	43.9777	21.4768	27.4541	22.709	6.06822	5.72489	6.02772	3.82897	4.39094	3.98672
ASHGA5P048179	1.82621e-05	0.00170548	3.55547	up	noncoding	TCONS_00013319	XLOC_005968	LincRNAs identified by Cabili et al	3365	chr7	+	2479468	2483692		CGGTGGTCTCATCTCTTCTCTCTCAAACCATGGATGGTGCCTTTTAAAGAAAATGACACC	intergenic							874.663	291.944	9.73752	7.90748	747.151	1081.67	795.171	316.946	272.147	286.74	9.64475	9.70206	9.86574	7.96026	7.92997	7.8322
ASHGA5P014719	0.00133022	0.0114051	2.84972	up	noncoding	ENST00000412751	RP11-154D6.1	GENCODE	465	chr6	-	71961060	72020279		ATATCCTCAGTTTGAAGCTGAAAAGGTTAAATTCTACCTGAAGGATGAAAACAACCAACA	intronic antisense	NM_024576	OGFRL1	opioid growth factor receptor-like protein 1	+	71998476	72011973	22.1215	15.1976	4.88375	3.37292	26.0677	23.0805	17.2162	15.4252	13.5618	16.606	5.22761	4.63526	4.78838	3.31558	3.30032	3.50287
ASHGA5P033891	0.00383661	0.0211115	2.18574	up	noncoding	ENST00000578967	RP11-676J15.1	GENCODE	457	chr18	+	70536274	70548632		ACCCACACCCGCGCCGCGGCTGGGGCTTGGGTTGGGGACTGTGGCGGCGAAGAAGCCGGG	intergenic							41.9101	31.6431	5.6422	4.51408	35.3941	64.4886	25.8475	35.1829	29.1764	30.5699	5.62264	5.9653	5.33866	4.60689	4.48887	4.44647
ASHGA5P035296	2.29717e-05	0.00179526	17.0676	up	noncoding	NR_036537	LOC100131320	RefSeq	2474	chr2	-	130724164	130738045		TCTCAGTCTTTCTCTCTTTTCTCTGGTGATTAAAAAGTTGGTTTTTGGTAAGGAAAAGGA	natural antisense	NM_032144	RAB6C	ras-related protein Rab-6C	+	130737234	130740311	3845.87	271.417	11.8827	7.78951	4109.19	3903.27	3525.16	294.588	276.163	243.501	12.0577	11.5995	11.9909	7.83993	7.95361	7.575
ASHGA5P027222	0.000432067	0.00641714	10.8758	up	noncoding	ENST00000553227	RP11-23J18.1	pseudogene	404	chr12	-	47529280	47529684		ATTCATCTACTCTGTGAAGTCTAGGACAGGAAGTCTATGGACAGGAAGATGGTTGGTGAC								997.59	115.348	9.867	6.42396	812.456	1506.86	673.455	112.567	76.6569	156.82	9.77168	10.2106	9.61871	6.36706	5.9901	6.91471
ASHGA5P019612	4.29416e-05	0.00236227	5.48291	up	noncoding	ENST00000496128	RP11-64D22.2	GENCODE	149	chr3	+	151488359	151494700		GCTACACCTGTGAAAATGGTAACAAATTTGCTACAGAATAGCACCTAAATATCATTTTCC	intergenic							25.4707	7.52044	5.06863	2.61369	23.0543	32.2656	21.0923	11.2667	6.17412	5.1205	5.06058	5.07318	5.07213	2.86092	2.54401	2.43612
ASHGA5P016946	0.0134028	0.0464376	2.03778	up	noncoding	ENST00000435925	AC090774.2	pseudogene	246	chr17	+	20859994	20861717		GGATGCCCAGGTGAAGCTGGACTGAATATTTCTGTCCATAAGACTATTAGAATCCCCCAA								45.8058	37.186	5.79652	4.76953	56.9016	52.4317	28.0841	39.1965	37.485	34.8766	6.2423	5.69631	5.45097	4.77114	4.88276	4.65468
ASHGA5P014803	7.41418e-05	0.00296732	3.34358	up	noncoding	ENST00000413483	AC129929.5	GENCODE	1460	chr11	-	2349978	2399222		CCCAGAAGACGAAATTGAAGACGAAGAGCAGGAATATATTCAAGCAATTATGAGAACTTA	natural antisense	NM_004356	CD81	CD81 antigen	+	2398546	2418649	15.2014	7.6539	4.35068	2.60929	13.6626	21.0626	10.879	8.68535	7.68441	6.59194	4.36376	4.51371	4.17458	2.6441	2.64256	2.54121
ASHGA5P022159	0.00928163	0.0369278	2.59163	up	noncoding	ENST00000550759	RP11-74K11.2	GENCODE	446	chr12	-	94561784	94579820		ACTGTGTCTGGCCAGGAATCTGTATTTTAAGAGCTCTCTCTCAGGAATGAAGTGCTTCGT	intronic antisense	NM_005761	PLXNC1	plexin-C1 precursor	+	94542498	94701451	26.0924	19.9587	5.1139	3.74004	27.4168	29.4115	21.4489	26.2766	12.8582	20.7414	5.29371	4.95506	5.09294	4.1482	3.21664	3.85529
ASHGA5P020141	6.74258e-05	0.00285566	12.7621	up	noncoding	ENST00000508664	RP11-164P12.4	GENCODE	304	chr4	+	152588375	152591654		ACAGAACACTGTCAAGATTTTGATTTACTAATTTATAATCTTATTTCCAAGCAAAACAAG	intergenic							83.7959	10.4322	6.58289	2.90909	74.157	117.853	59.3773	6.68539	11.6801	12.9311	6.60135	6.7268	6.4205	2.52161	3.07195	3.13371
ASHGA5P015300	0.00020782	0.00448913	2.29542	up	noncoding	NR_046479	FKBP14	RefSeq	4934	chr7	-	30050198	30066417		CTCCTTATTTCACTCCACGTAAAATTCCCCCAGAAAGTACACTGATATTTAATATTGATC	exon sense-overlapping	NM_017946	FKBP14	peptidyl-prolyl cis-trans isomerase FKBP14 precursor	-	30050198	30066417	290.33	164.869	8.23513	7.03637	241.772	372.15	257.069	178.958	161.886	153.764	8.14166	8.23502	8.32871	7.07904	7.14059	6.88947
ASHGA5P016331	0.0030822	0.0184501	2.31783	up	noncoding	ENST00000429420	RP11-34D15.2	GENCODE	471	chr10	-	102095319	102106147		TTTCTTATAGGCCAAATGGTATCACTCCATTCTACTGGTGTCAGCTGCTTGAAATAGTGT	bidirectional	NM_005063	SCD	acyl-CoA desaturase	+	102106771	102124588	40.0002	29.0454	5.59503	4.38226	30.4208	61.2472	28.3325	30.6396	30.7541	25.7426	5.42493	5.89815	5.46202	4.39418	4.5732	4.1794
ASHGA5P046742	0.000132184	0.00370832	6.63062	up	noncoding	NR_001533	TTTY8	RefSeq	542	chrY	-	6339071	6341671		TCTGTGAAAATGTTGTGAGTGTTGGATGTCTGCATGTGTGTGTGCCATTGTGTGCTTAGG	intergenic							3010	522.068	11.5095	8.78036	2320.64	3514.55	3194.81	582.941	492.913	490.348	11.2488	11.432	11.8477	8.87704	8.80524	8.65879
ASHGA5P029828	0.023158	0.0661701	2.05292	up	noncoding	TCONS_00016209	XLOC_007599	LincRNAs identified by Cabili et al	455	chr9	+	137378127	137437051		TTGCTCCAGGAAGTCGCCTGGCCTGAGACTTTCCTAAATTCTACCCAGACTCAGCGCCCA	intergenic							14.202	13.6892	4.2452	3.20752	16.2645	18.1353	8.20616	15.7659	14.6604	10.6413	4.60244	4.32052	3.81264	3.34392	3.41829	2.86034
ASHGA5P046588	3.10383e-05	0.00200997	5.36679	up	noncoding	uc004ecf.1	AX748371	UCSC_knowngene	2109	chrX	+	74544123	74546232		CAAATCATTATCTCCTATCAAAGGACTACTGTTATTCAATCATCTAGAAAATTCATTTTA	intergenic							177.938	47.1786	7.55393	5.12987	140.147	262.5	131.166	53.0564	42.4612	46.0183	7.44047	7.76224	7.45908	5.23164	5.078	5.07998
ASHGA5P029285	0.00554822	0.0265597	2.29598	up	noncoding	ENST00000554519	RP11-1152H15.1	GENCODE	813	chr14	-	88202745	88282595		TGGGTCGACTAAAATAAAAACAGTCCCCCTAGTCTGGATGCCCTGTGTACCTTGCAACTG	intergenic							577.538	306.656	9.17436	7.97526	635.123	581.786	515.705	340.596	310.968	268.404	9.42942	8.82586	9.26782	8.07523	8.12706	7.72348
ASHGA5P044381	0.00140492	0.0117371	5.48222	up	noncoding	ENST00000520306	RP11-37B2.1	GENCODE	421	chr8	-	90629157	90633104		TTATAAACCTTAGAATTAAGAAGTTCTTTTGTAAATACAATTATAATTCTTTCTTCTCGA	intergenic							163.426	44.6983	7.49296	5.0382	195.397	152.094	142.788	38.0883	53.5074	42.4992	7.85193	7.05252	7.57445	4.72521	5.42538	4.96401
ASHGA5P049393	0.00353488	0.0200104	2.54582	up	noncoding	ENST00000563927	RP11-356C4.2	GENCODE	1523	chr16	+	90160430	90162597	ENST00000503395	TTCATTTCCCGTGAGCTGCGGGCGAGGACTGGGGTGCGGCTCCTTAGCCAGGGCAGCTCA	intergenic							62.6334	38.5623	6.1734	4.82527	40.8228	94.4407	52.6367	38.6457	41.5622	35.4789	5.81258	6.44573	6.2619	4.74801	5.0465	4.68131
ASHGA5P029547	0.00826742	0.0342848	4.41459	up	noncoding	ENST00000557308	RP11-280K24.1	GENCODE	448	chr14	+	52217277	52229832		ACACTGCAAAAGGAATGGAACAGATAAGAAGGTATTGAGATTAGAACGTGCTGCCGTGCG	intergenic							49.0939	18.2268	5.78813	3.64585	21.2091	69.7254	56.347	21.4753	17.1656	16.0396	4.95183	6.05868	6.35389	3.82829	3.66013	3.44913
ASHGA5P038136	8.2322e-06	0.00130923	21.8876	up	noncoding	ENST00000436123	AC098971.2	GENCODE	2964	chr3	-	24137759	24144714		CCATGTTTTAATCACCTTTGGGTCTCCTTGGCTGCTCAATAAATATTTGAATGAATCAAA	intergenic							47739.1	2846.85	15.692	11.24	48392.3	50871.6	43953.5	2857.94	3217.77	2464.86	15.7004	15.6234	15.7523	11.1944	11.5161	11.0095
ASHGA5P026210	0.0289384	0.0767192	2.87525	up	noncoding	ENST00000532365	RP11-685M7.5	GENCODE	441	chr11	+	10804859	10823172		CCAGCATAAAGTCCTCTTAATAACGCGTCTTTTTATAATCATCGGGCAATAAATTTCTGA	intronic antisense	NM_001042559	EIF4G2	eukaryotic translation initiation factor 4 gamma 2 isoform 2	-	10818592	10830582	100.836	56.7744	6.85427	5.33058	75.0294	118.632	108.846	54.3147	81.4957	34.5128	6.61588	6.7356	7.21132	5.26798	6.08551	4.63826
ASHGA5P026210	0.0289384	0.0767192	2.87525	up	noncoding	ENST00000532365	RP11-685M7.5	GENCODE	441	chr11	+	10804859	10823172		CCAGCATAAAGTCCTCTTAATAACGCGTCTTTTTATAATCATCGGGCAATAAATTTCTGA	intronic antisense	NM_001172705	EIF4G2	eukaryotic translation initiation factor 4 gamma 2 isoform 1	-	10818592	10829543	100.836	56.7744	6.85427	5.33058	75.0294	118.632	108.846	54.3147	81.4957	34.5128	6.61588	6.7356	7.21132	5.26798	6.08551	4.63826
ASHGA5P026210	0.0289384	0.0767192	2.87525	up	noncoding	ENST00000532365	RP11-685M7.5	GENCODE	441	chr11	+	10804859	10823172		CCAGCATAAAGTCCTCTTAATAACGCGTCTTTTTATAATCATCGGGCAATAAATTTCTGA	intronic antisense	NM_001418	EIF4G2	eukaryotic translation initiation factor 4 gamma 2 isoform 1	-	10818592	10830582	100.836	56.7744	6.85427	5.33058	75.0294	118.632	108.846	54.3147	81.4957	34.5128	6.61588	6.7356	7.21132	5.26798	6.08551	4.63826
ASHGA5P054706	0.000332118	0.00560857	9.53953	up	noncoding	TCONS_00006375	XLOC_002995	LincRNAs identified by Cabili et al	543	chr3	+	195362628	195363268	TCONS_00006773	CTCGGGCCAGGTGACCTTTATGGCGGCGCCTTCTGTCCCTGGTCGCTTTTCCACTGAATG	intron sense-overlapping	ENST00000381954	MUC20	mucin 20, cell surface associated [Source:HGNC Symbol;Acc:23282]	+	195343315	195460421	5797.6	701.322	12.4758	9.22187	6571.25	5051.61	5769.93	705.558	781.348	617.059	12.73	11.9882	12.7091	9.16309	9.49891	9.00362
ASHGA5P022109	0.00150573	0.0121932	2.59934	up	noncoding	ENST00000549360	CTD-2251F13.1	GENCODE	768	chr14	-	30441874	30766223		CCAGCCAGGCTTCCTGTACAGCTTGTGGAACTACTAACCAATATAATTAGCCAATTAACA	intron sense-overlapping	ENST00000549503	PRKD1	protein kinase D1 [Source:HGNC Symbol;Acc:9407]	-	30133017	30661104	1059.35	480.789	10.037	8.65887	1040.59	1136.73	1000.72	495.831	513.678	432.857	10.1291	9.77242	10.2095	8.63744	8.87158	8.46759
ASHGA5P020756	1.93816e-05	0.00170952	35.2245	up	noncoding	ENST00000520432	TPT1-AS1	GENCODE	897	chr13	+	45956959	45965487	ENST00000519454, ENST00000520585, ENST00000522673	GTCGGAGAGTAAATCCGAAAAAAACAAACAAAGACATGGATTTACTGTGCATATTAGCAG	intergenic							188.992	7.33691	7.68744	2.54893	186.604	188.291	192.082	7.75709	5	9.25364	7.79602	7.3176	7.9487	2.58639	2.34646	2.71394
ASHGA5P032607	0.0232336	0.0662749	2.50208	up	noncoding	uc002jez.3	AMZ2P1	UCSC_knowngene	2511	chr17	-	62962667	62971168	ENST00000430983, uc002jfb.3, uc010del.2	GCACTATGAGACCAGGAGAAAAATCATCTAAGAAATCGTTCACTCTTGCTAAAAACTGAA	intergenic							107.014	67.7153	6.95721	5.63408	118.581	111.28	91.1816	75.0592	84.1977	43.8892	7.22634	6.65146	6.99384	5.7552	6.13557	5.01149
ASHGA5P020891	0.0025949	0.016805	2.30755	up	noncoding	ENST00000521511	RP11-495O10.1	GENCODE	735	chr8	-	38558143	38562373		AGGTTAAGCGAGCTTTCCTTCCTTACGGAATCTCCCAGCCCCTAATTCTATAATACTACT	intergenic							3380.64	1646.9	11.6437	10.4374	3266.37	4604.98	2270.57	1939.98	1367.14	1633.57	11.711	11.865	11.3553	10.622	10.285	10.4052
ASHGA5P023727	0.000687925	0.00797184	3.60832	up	noncoding	HMlincRNA1613-	HMlincRNA1613	LincRNAs identified by Khalil et al	9863	chrX	-	118619272	118629135		AGGACAGGGAGTGGCCCTCTTACTCCTCCCTTTTTCTTTCTTCCTTAGGTTCTTTTATAT	intergenic							1363.76	453.035	10.413	8.56164	1371.49	1381.67	1338.11	521.028	430.499	407.578	10.5327	10.0843	10.622	8.71193	8.60561	8.36737
ASHGA5P038595	0.00547497	0.02635	2.68302	up	noncoding	ENST00000431427	HTR3E-AS1	GENCODE	515	chr3	-	183812905	183822966		TTCAATGATGAAAATGTCTGGGAGCCACAGGTTCTTGGCTGCCATACTCATCTTCGTGAT	natural antisense	NM_001256613	HTR3E	5-hydroxytryptamine receptor 3E isoform d precursor	+	183814851	183824783	15.7945	12.0916	4.45108	3.02722	18.2469	13.8293	15.3073	14.4268	10.7308	11.1173	4.75523	3.96924	4.62876	3.2123	2.95214	2.9172
ASHGA5P038595	0.00547497	0.02635	2.68302	up	noncoding	ENST00000431427	HTR3E-AS1	GENCODE	515	chr3	-	183812905	183822966		TTCAATGATGAAAATGTCTGGGAGCCACAGGTTCTTGGCTGCCATACTCATCTTCGTGAT	natural antisense	NM_001256614	HTR3E	5-hydroxytryptamine receptor 3E isoform e	+	183817966	183824783	15.7945	12.0916	4.45108	3.02722	18.2469	13.8293	15.3073	14.4268	10.7308	11.1173	4.75523	3.96924	4.62876	3.2123	2.95214	2.9172
ASHGA5P038595	0.00547497	0.02635	2.68302	up	noncoding	ENST00000431427	HTR3E-AS1	GENCODE	515	chr3	-	183812905	183822966		TTCAATGATGAAAATGTCTGGGAGCCACAGGTTCTTGGCTGCCATACTCATCTTCGTGAT	natural antisense	NM_182589	HTR3E	5-hydroxytryptamine receptor 3E isoform a	+	183817966	183824783	15.7945	12.0916	4.45108	3.02722	18.2469	13.8293	15.3073	14.4268	10.7308	11.1173	4.75523	3.96924	4.62876	3.2123	2.95214	2.9172
ASHGA5P038595	0.00547497	0.02635	2.68302	up	noncoding	ENST00000431427	HTR3E-AS1	GENCODE	515	chr3	-	183812905	183822966		TTCAATGATGAAAATGTCTGGGAGCCACAGGTTCTTGGCTGCCATACTCATCTTCGTGAT	natural antisense	NM_198313	HTR3E	5-hydroxytryptamine receptor 3E isoform c precursor	+	183814851	183824783	15.7945	12.0916	4.45108	3.02722	18.2469	13.8293	15.3073	14.4268	10.7308	11.1173	4.75523	3.96924	4.62876	3.2123	2.95214	2.9172
ASHGA5P038595	0.00547497	0.02635	2.68302	up	noncoding	ENST00000431427	HTR3E-AS1	GENCODE	515	chr3	-	183812905	183822966		TTCAATGATGAAAATGTCTGGGAGCCACAGGTTCTTGGCTGCCATACTCATCTTCGTGAT	natural antisense	NM_198314	HTR3E	5-hydroxytryptamine receptor 3E isoform b	+	183817966	183824783	15.7945	12.0916	4.45108	3.02722	18.2469	13.8293	15.3073	14.4268	10.7308	11.1173	4.75523	3.96924	4.62876	3.2123	2.95214	2.9172
ASHGA5P015656	0.0119916	0.0434085	2.93731	up	noncoding	ENST00000422284	RP11-446F17.3	GENCODE	343	chr6	-	46638180	46655537		TTGAGCACTGGGGGCCAGGCAAGGGAGAACATACTATTTCATATCAAATCAGATTCTCCA	intronic antisense	NM_001204051	SLC25A27	mitochondrial uncoupling protein 4 isoform 2	+	46620651	46645927	16.085	8.98621	4.30013	2.74563	11.0082	28.3508	8.89598	13.4687	6.08067	7.40923	4.07718	4.90677	3.91643	3.10479	2.53732	2.59479
ASHGA5P015656	0.0119916	0.0434085	2.93731	up	noncoding	ENST00000422284	RP11-446F17.3	GENCODE	343	chr6	-	46638180	46655537		TTGAGCACTGGGGGCCAGGCAAGGGAGAACATACTATTTCATATCAAATCAGATTCTCCA	intronic antisense	NM_001204052	SLC25A27	mitochondrial uncoupling protein 4 isoform 3	+	46620651	46645927	16.085	8.98621	4.30013	2.74563	11.0082	28.3508	8.89598	13.4687	6.08067	7.40923	4.07718	4.90677	3.91643	3.10479	2.53732	2.59479
ASHGA5P015656	0.0119916	0.0434085	2.93731	up	noncoding	ENST00000422284	RP11-446F17.3	GENCODE	343	chr6	-	46638180	46655537		TTGAGCACTGGGGGCCAGGCAAGGGAGAACATACTATTTCATATCAAATCAGATTCTCCA	intronic antisense	NM_004277	SLC25A27	mitochondrial uncoupling protein 4 isoform 1	+	46620651	46645927	16.085	8.98621	4.30013	2.74563	11.0082	28.3508	8.89598	13.4687	6.08067	7.40923	4.07718	4.90677	3.91643	3.10479	2.53732	2.59479
ASHGA5P030174	1.99916e-07	0.000437461	3.75592	up	noncoding	ENST00000558971	RP11-762H8.3	GENCODE	383	chr15	-	78549886	78556498		ACATCTCATCTCTCCTCTGTCACTCCTTCCCCATTATTAAAGTTTGTGGATGTTCCTTAG	natural antisense	NM_018602	DNAJA4	dnaJ homolog subfamily A member 4 isoform 1	+	78556486	78574538	8798.81	2717.82	13.0859	11.1768	8502.97	10664.1	7229.39	2865.67	2582.12	2705.68	13.085	13.1264	13.0464	11.1994	11.1688	11.1622
ASHGA5P045968	0.00158974	0.012604	4.05554	up	noncoding	ENST00000369027	RP11-10J18.3	GENCODE	266	chr9	+	127277216	127278335		AAGATTACTGAGACGACATGCGTGAAGCACCAATTACGGCGCCTGGACTCACGAGGCGGT	intergenic							26.5986	12.5973	5.10182	3.08193	24.0918	36.2859	19.4181	13.104	7.84987	16.838	5.12092	5.22669	4.95786	3.06316	2.65312	3.5295
ASHGA5P052237	0.00040451	0.0061893	2.76509	up	noncoding	ENST00000515466	RP11-159F24.1	GENCODE	557	chr5	-	43575879	43603278	ENST00000506247	TCCCCGCCCCAGCTTTCTTCCCGCCAGGCCCCCTCCACCCGATCGCCGCGCGCTCTCCGA	natural antisense	NM_012343	NNT	NAD(P) transhydrogenase, mitochondrial	+	43602790	43705668	23518	10022.6	14.5655	13.0981	23329.5	28407.2	18817.3	10318.4	8661.87	11087.4	14.5732	14.6805	14.4426	13.085	12.9042	13.3052
ASHGA5P052237	0.00040451	0.0061893	2.76509	up	noncoding	ENST00000515466	RP11-159F24.1	GENCODE	557	chr5	-	43575879	43603278	ENST00000506247	TCCCCGCCCCAGCTTTCTTCCCGCCAGGCCCCCTCCACCCGATCGCCGCGCGCTCTCCGA	natural antisense	NM_182977	NNT	NAD(P) transhydrogenase, mitochondrial	+	43603228	43705668	23518	10022.6	14.5655	13.0981	23329.5	28407.2	18817.3	10318.4	8661.87	11087.4	14.5732	14.6805	14.4426	13.085	12.9042	13.3052
ASHGA5P023524	0.00316762	0.0187455	3.50539	up	noncoding	ENST00000583018	CTD-2514K5.4	GENCODE	513	chr17	-	72253034	72258159		TGAACTCCAGGCTGGCATTTAAAAGGTGCTGACTTTTAGGCTGGGCGTGGTGGCTCATGC	natural antisense	NM_032646	TTYH2	protein tweety homolog 2 isoform 1	+	72209695	72258157	9462.96	3123.69	13.1612	11.3516	8413.88	13053.2	6921.86	3168.44	2135.19	4067.43	13.0698	13.4346	12.9792	11.3501	10.9209	11.7839
ASHGA5P023524	0.00316762	0.0187455	3.50539	up	noncoding	ENST00000583018	CTD-2514K5.4	GENCODE	513	chr17	-	72253034	72258159		TGAACTCCAGGCTGGCATTTAAAAGGTGCTGACTTTTAGGCTGGGCGTGGTGGCTCATGC	natural antisense	NM_052869	TTYH2	protein tweety homolog 2 isoform 2	+	72244504	72258157	9462.96	3123.69	13.1612	11.3516	8413.88	13053.2	6921.86	3168.44	2135.19	4067.43	13.0698	13.4346	12.9792	11.3501	10.9209	11.7839
ASHGA5P056888	0.000444317	0.00647696	5.28279	up	noncoding	TCONS_00010281	XLOC_004751	LincRNAs identified by Cabili et al	317	chr5	-	21138914	21172730		AATTCAAACAACAGAAAACATCTCCCAGCCACATCAAGCAAGCAGCAGCGACGTGTTTCT	intergenic							2072.58	444.075	10.9288	8.52746	2002.31	2946.71	1268.71	528.873	356.528	446.826	11.0533	11.1844	10.5486	8.73436	8.33216	8.51586
ASHGA5P023453	1.39858e-05	0.00152133	11.1516	up	noncoding	ENST00000581225	RP11-640N20.8	GENCODE	299	chr17	-	30415178	30421952	ENST00000582111, NM_052888	GTATTTATAAATTTATCCTGCAATAAAATACGATATATTGAAAGACATACATTTGAATCA	intergenic							46.9699	5	5.82251	2.34333	34.0994	68.8688	37.9414	5	5	5	5.57572	6.0461	5.84569	2.34074	2.34646	2.34278
ASHGA5P032484	6.19568e-05	0.00275435	4.23759	up	noncoding	ENST00000571665	RP11-156P1.3	GENCODE	255	chr17	-	45177201	45177689		CAGAGGAGGGCGGAAGATTCCCCGCCCCCACTTCTAGGCTTGGTTGAGCCGCGCAGGAAG	intergenic							354.831	112.125	8.52559	6.44234	336.879	391.888	335.726	121.15	102.474	112.752	8.57941	8.30094	8.69641	6.47884	6.42838	6.4198
ASHGA5P029067	0.000211033	0.00450768	3.69437	up	noncoding	EB386294		LincRNAs identified by Khalil et al	795	chr10	-	20678507	20679302		CCTGGAATTCCATTTCTTTTCCATGCCACGTAACTGCATCCTGATGCCCTGATGATTTTG	intergenic							94.2081	38.9259	6.71412	4.82879	76.8841	140.313	65.4271	45.4492	34.1381	37.1903	6.64275	6.94779	6.55182	4.99768	4.73417	4.75452
ASHGA5P015145	0.0226914	0.0652958	4.67812	up	noncoding	ENST00000417264	RP11-533K9.2	GENCODE	155	chr9	+	97247981	97250077	ENST00000453939, NR_027472, NR_037597, TCONS_00015685, uc021vlc.1	AGTCCGTTGAAGATGAGGAGTCCATTGAAGATGAGGATCTGTTGAAGATGAGGAGTCCTT	intergenic							29.5206	9.16892	4.94071	2.71478	29.6643	50.9703	7.92733	11.1571	5	11.3496	5.39101	5.65809	3.77302	2.84755	2.34646	2.95032
ASHGA5P041602	0.00179226	0.013472	2.32214	up	noncoding	ENST00000504573	CTB-129O4.1	GENCODE	393	chr5	+	179720244	179722253		GAAAACCGTGGAGAGCCGGCCTTTGGGGACTAGAAGAGTGGGAACAATGGTTGACAAATG	intergenic							78.609	53.7234	6.54766	5.33221	87.8602	81.3535	66.6135	54.0993	52.2629	54.808	6.8108	6.25795	6.57424	5.26155	5.39149	5.34358
ASHGA5P020041	0.00339732	0.0195806	3.69221	up	noncoding	ENST00000507217	RP11-348J24.2	GENCODE	576	chr5	+	91378413	91815133		CAGCCTGTGGCCAGAAAACATACTCTGTGTGTTTTAATTCCTTGGACTTGATTGAGACTT	intergenic							143.676	58.0205	7.33279	5.44831	163.526	122.639	144.864	58.8479	62.4084	52.8053	7.63646	6.77148	7.59044	5.38723	5.66745	5.29023
ASHGA5P044693	1.75668e-05	0.00170548	6.53592	up	noncoding	uc009vir.3	WASH7P	UCSC_knowngene	2006	chr1	-	14361	29370	uc009vit.3, uc009viu.3, uc009viw.2, uc009vjc.1, uc009vje.2	AGGAACATGGGCTCAGGACAGCGGGTGTCAGCTTGCCTGACCCCCATGTCGCCTCTGTAG	intergenic							56.4623	15.6143	6.1201	3.41171	52.2016	63.6225	53.5627	17.3721	14.9387	14.5321	6.13165	5.94481	6.28385	3.48381	3.44731	3.30402
ASHGA5P053859	0.000139272	0.00380712	5.10125	up	noncoding	uc004cas.1	LQFBS-1	UCSC_knowngene	2713	chr9	-	134372865	134375578		ATTCTTTCATATGGAAAGAGCTAGTACAATCACATATTTGAAAGGAGAAACAATAGGTAC	natural antisense	NM_013318	PRRC2B	protein PRRC2B	+	134305476	134375575	353.238	93.2499	8.51893	6.16808	368.969	386.107	304.637	98.4011	97.4387	83.9098	8.71012	8.28269	8.56399	6.17295	6.34994	5.98135
ASHGA5P056584	0.00341484	0.0196298	2.01216	up	noncoding	TCONS_00006336	XLOC_002952	LincRNAs identified by Cabili et al	789	chr3	+	184445192	184456749		GCATTCCTTGCTACAGCCACAAGCTGTCTCCACCATCAGATGTGGCTTACCTGGTTCCTG	intergenic							68.0016	54.0686	6.34454	5.33579	57.2736	84.9942	61.7369	47.9186	59.4226	54.8644	6.25198	6.30977	6.47185	5.07423	5.58812	5.34503
ASHGA5P022950	4.46864e-05	0.00238725	13.5866	up	noncoding	ENST00000566255	RP11-566K19.9	pseudogene	1708	chr15	-	23572031	23579274	ENST00000316397, ENST00000427390, ENST00000568624	AGGAAAAGATATACGGAAGCAGGAGGAGAAGATGTGGAGGCAGGAGGAGAAGATGCACGA								63.0226	5.2755	6.15441	2.3903	44.651	101.52	42.897	5	5	5.82651	5.92946	6.53626	5.99751	2.34074	2.34646	2.48369
ASHGA5P023742	0.000230096	0.00470965	2.84844	up	noncoding	HMlincRNA1639+	HMlincRNA1639	LincRNAs identified by Khalil et al	7720	chrX	+	68350530	68358250		AGAGCTCTCTTAGTTCCCAACCATTTTCCTGGAGCCCCCTGAGATAAATTAGTTGTGTCT	intergenic							639.517	271.865	9.30204	7.79187	553.031	765.171	600.348	309.513	256.083	249.999	9.23996	9.2103	9.45585	7.92262	7.83818	7.6148
ASHGA5P046372	0.0230383	0.0659952	2.29841	up	noncoding	ENST00000431993	RP5-937E21.8	GENCODE	1167	chrX	-	148629754	148631380		ACAGGCCACTAATGGCCCATAAAAGTTGCCATTTTTTAATGAGAAACACATTTTTGGTCT	natural antisense	NM_001171909	CXorf40A	protein CXorf40A isoform b	+	148626065	148632086	11.785	9.70701	4.00884	2.8082	13.2055	15.0094	7.14005	10.7283	13.3927	5	4.31459	4.07039	3.64153	2.80073	3.2811	2.34278
ASHGA5P034321	8.4873e-05	0.00310145	2.81222	up	noncoding	ENST00000270443	ZNF702P	GENCODE	2990	chr19	-	53471503	53496777		TTGACTTAACATTGAGTTCAAGTATTTGTTGAGATTAAAGTGTTTATGTTAAGAGGATTA	intergenic							3007.44	1205.51	11.4974	10.0057	3001.17	3583.82	2437.32	1251.88	1241.09	1123.54	11.583	11.4639	11.4453	10.009	10.1449	9.86321
ASHGA5P033139	0.000670391	0.0078728	2.13905	up	noncoding	ENST00000424548	AC003043.2	GENCODE	515	chr17	+	42396995	42397584		ATCTTTAGACTTAAGGAATTAACAAGGGTCAGGGAGACTACACCAGGCTGAGGGCTTCTT	natural antisense	NM_001143780	SLC25A39	solute carrier family 25 member 39 isoform a	-	42396992	42402217	104.794	74.7662	6.92805	5.83108	106.591	117.421	90.3689	76.4441	67.5388	80.3155	7.08237	6.72252	6.97925	5.78813	5.7907	5.91441
ASHGA5P033139	0.000670391	0.0078728	2.13905	up	noncoding	ENST00000424548	AC003043.2	GENCODE	515	chr17	+	42396995	42397584		ATCTTTAGACTTAAGGAATTAACAAGGGTCAGGGAGACTACACCAGGCTGAGGGCTTCTT	natural antisense	NM_016016	SLC25A39	solute carrier family 25 member 39 isoform b	-	42396992	42402217	104.794	74.7662	6.92805	5.83108	106.591	117.421	90.3689	76.4441	67.5388	80.3155	7.08237	6.72252	6.97925	5.78813	5.7907	5.91441
ASHGA5P031935	0.000168277	0.00410257	6.20249	up	noncoding	ENST00000563230	RP11-556H2.3	GENCODE	433	chr16	+	79123946	79135651		GGAATTACCTGGGATCATTTCTCATCCTCTCTCTCTTTCTCTGTATTACTTAGCCTTAAA	intron sense-overlapping	NM_016373	WWOX	WW domain-containing oxidoreductase isoform 1	+	78133326	79246564	3467.02	645.042	11.7215	9.08862	3029.73	3974.14	3397.21	790.649	612.86	531.618	11.5954	11.6313	11.9378	9.32902	9.15104	8.78581
ASHGA5P019076	5.00676e-05	0.00248515	6.79351	up	noncoding	NR_046070	CHD1L	RefSeq	2851	chr1	+	146714290	146767447		TGTATTCTGGGTGGAGTTGGCATGAACTTAACAGCAGCAGATACTGTGATTTTTGTTGAC	exon sense-overlapping	NM_001256336	CHD1L	chromodomain-helicase-DNA-binding protein 1-like isoform 2	+	146714290	146767447	1615.11	287.897	10.6437	7.87958	1497.97	1888.33	1459.03	272.418	313.884	277.389	10.6594	10.52	10.7518	7.71621	8.14355	7.77897
ASHGA5P019076	5.00676e-05	0.00248515	6.79351	up	noncoding	NR_046070	CHD1L	RefSeq	2851	chr1	+	146714290	146767447		TGTATTCTGGGTGGAGTTGGCATGAACTTAACAGCAGCAGATACTGTGATTTTTGTTGAC	exon sense-overlapping	NM_001256337	CHD1L	chromodomain-helicase-DNA-binding protein 1-like isoform 4	+	146714290	146767447	1615.11	287.897	10.6437	7.87958	1497.97	1888.33	1459.03	272.418	313.884	277.389	10.6594	10.52	10.7518	7.71621	8.14355	7.77897
ASHGA5P019076	5.00676e-05	0.00248515	6.79351	up	noncoding	NR_046070	CHD1L	RefSeq	2851	chr1	+	146714290	146767447		TGTATTCTGGGTGGAGTTGGCATGAACTTAACAGCAGCAGATACTGTGATTTTTGTTGAC	exon sense-overlapping	NM_001256338	CHD1L	chromodomain-helicase-DNA-binding protein 1-like isoform 5	+	146714290	146767447	1615.11	287.897	10.6437	7.87958	1497.97	1888.33	1459.03	272.418	313.884	277.389	10.6594	10.52	10.7518	7.71621	8.14355	7.77897
ASHGA5P019076	5.00676e-05	0.00248515	6.79351	up	noncoding	NR_046070	CHD1L	RefSeq	2851	chr1	+	146714290	146767447		TGTATTCTGGGTGGAGTTGGCATGAACTTAACAGCAGCAGATACTGTGATTTTTGTTGAC	exon sense-overlapping	NM_004284	CHD1L	chromodomain-helicase-DNA-binding protein 1-like isoform 1	+	146714290	146767447	1615.11	287.897	10.6437	7.87958	1497.97	1888.33	1459.03	272.418	313.884	277.389	10.6594	10.52	10.7518	7.71621	8.14355	7.77897
ASHGA5P019076	5.00676e-05	0.00248515	6.79351	up	noncoding	NR_046070	CHD1L	RefSeq	2851	chr1	+	146714290	146767447		TGTATTCTGGGTGGAGTTGGCATGAACTTAACAGCAGCAGATACTGTGATTTTTGTTGAC	exon sense-overlapping	NM_024568	CHD1L	chromodomain-helicase-DNA-binding protein 1-like isoform 3	+	146714290	146767447	1615.11	287.897	10.6437	7.87958	1497.97	1888.33	1459.03	272.418	313.884	277.389	10.6594	10.52	10.7518	7.71621	8.14355	7.77897
ASHGA5P025804	0.00019282	0.00434406	2.024	up	noncoding	NR_038193	METTL23	RefSeq	809	chr17	+	74722911	74729962		CGTCCCGCAGATTTTGAAGACATTTTGGCTACAATATATTTTTTGATGCACAAGAATCCC	exon sense-overlapping	NM_001080510	METTL23	methyltransferase-like protein 23 isoform 1	+	74722911	74729962	6559.92	3723.25	12.6733	11.6561	6570.26	7128.44	5981.05	3856.45	3754.49	3558.8	12.7288	12.5351	12.7559	11.6536	11.7158	11.5988
ASHGA5P025804	0.00019282	0.00434406	2.024	up	noncoding	NR_038193	METTL23	RefSeq	809	chr17	+	74722911	74729962		CGTCCCGCAGATTTTGAAGACATTTTGGCTACAATATATTTTTTGATGCACAAGAATCCC	exon sense-overlapping	NM_001206983	METTL23	methyltransferase-like protein 23 isoform 1	+	74722911	74729962	6559.92	3723.25	12.6733	11.6561	6570.26	7128.44	5981.05	3856.45	3754.49	3558.8	12.7288	12.5351	12.7559	11.6536	11.7158	11.5988
ASHGA5P025804	0.00019282	0.00434406	2.024	up	noncoding	NR_038193	METTL23	RefSeq	809	chr17	+	74722911	74729962		CGTCCCGCAGATTTTGAAGACATTTTGGCTACAATATATTTTTTGATGCACAAGAATCCC	exon sense-overlapping	NM_001206984	METTL23	methyltransferase-like protein 23 isoform 1	+	74722911	74729962	6559.92	3723.25	12.6733	11.6561	6570.26	7128.44	5981.05	3856.45	3754.49	3558.8	12.7288	12.5351	12.7559	11.6536	11.7158	11.5988
ASHGA5P025804	0.00019282	0.00434406	2.024	up	noncoding	NR_038193	METTL23	RefSeq	809	chr17	+	74722911	74729962		CGTCCCGCAGATTTTGAAGACATTTTGGCTACAATATATTTTTTGATGCACAAGAATCCC	exon sense-overlapping	NM_001206985	METTL23	methyltransferase-like protein 23 isoform 2	+	74722911	74729962	6559.92	3723.25	12.6733	11.6561	6570.26	7128.44	5981.05	3856.45	3754.49	3558.8	12.7288	12.5351	12.7559	11.6536	11.7158	11.5988
ASHGA5P025804	0.00019282	0.00434406	2.024	up	noncoding	NR_038193	METTL23	RefSeq	809	chr17	+	74722911	74729962		CGTCCCGCAGATTTTGAAGACATTTTGGCTACAATATATTTTTTGATGCACAAGAATCCC	exon sense-overlapping	NM_001206986	METTL23	methyltransferase-like protein 23 isoform 2	+	74722911	74729962	6559.92	3723.25	12.6733	11.6561	6570.26	7128.44	5981.05	3856.45	3754.49	3558.8	12.7288	12.5351	12.7559	11.6536	11.7158	11.5988
ASHGA5P025804	0.00019282	0.00434406	2.024	up	noncoding	NR_038193	METTL23	RefSeq	809	chr17	+	74722911	74729962		CGTCCCGCAGATTTTGAAGACATTTTGGCTACAATATATTTTTTGATGCACAAGAATCCC	exon sense-overlapping	NM_001206987	METTL23	methyltransferase-like protein 23 isoform 2	+	74722911	74729962	6559.92	3723.25	12.6733	11.6561	6570.26	7128.44	5981.05	3856.45	3754.49	3558.8	12.7288	12.5351	12.7559	11.6536	11.7158	11.5988
ASHGA5P048184	0.000723646	0.00820116	2.60505	up	noncoding	ENST00000537965	SNHG1	GENCODE	578	chr11	-	62621839	62622960	ENST00000541416	GTTTTCTGGTTCCTCTTGTTCTCTGTAGTGATGTTTCTAGATAGATGCCCACTGATATAT	bidirectional	NM_001012662	SLC3A2	4F2 cell-surface antigen heavy chain isoform b	+	62623483	62656355	964.04	434.92	9.88593	8.50462	1030.21	1069.72	792.192	484.33	419.065	401.365	10.1125	9.68605	9.8593	8.60702	8.56016	8.34669
ASHGA5P048184	0.000723646	0.00820116	2.60505	up	noncoding	ENST00000537965	SNHG1	GENCODE	578	chr11	-	62621839	62622960	ENST00000541416	GTTTTCTGGTTCCTCTTGTTCTCTGTAGTGATGTTTCTAGATAGATGCCCACTGATATAT	bidirectional	NM_001012664	SLC3A2	4F2 cell-surface antigen heavy chain isoform e	+	62623483	62656355	964.04	434.92	9.88593	8.50462	1030.21	1069.72	792.192	484.33	419.065	401.365	10.1125	9.68605	9.8593	8.60702	8.56016	8.34669
ASHGA5P048184	0.000723646	0.00820116	2.60505	up	noncoding	ENST00000537965	SNHG1	GENCODE	578	chr11	-	62621839	62622960	ENST00000541416	GTTTTCTGGTTCCTCTTGTTCTCTGTAGTGATGTTTCTAGATAGATGCCCACTGATATAT	bidirectional	NM_002394	SLC3A2	4F2 cell-surface antigen heavy chain isoform c	+	62623483	62656355	964.04	434.92	9.88593	8.50462	1030.21	1069.72	792.192	484.33	419.065	401.365	10.1125	9.68605	9.8593	8.60702	8.56016	8.34669
ASHGA5P016452	1.346e-05	0.00151943	3.25384	up	noncoding	ENST00000430525	TTC28-AS1	GENCODE	524	chr22	+	28315471	28389493		AAATAGTACTTCAAGAGCACAGTCTTATGTAAGGTGTGGAGATGCTTGTATCTGGGACCC	natural antisense	NM_001145418	TTC28	tetratricopeptide repeat protein 28	-	28374001	29075853	62.9455	32.0004	6.23647	4.53432	55.9134	81.8712	51.0518	34.7907	31.4141	29.7965	6.22	6.26634	6.22307	4.59062	4.60635	4.406
ASHGA5P020997	9.8329e-05	0.00326449	2.22834	up	noncoding	NR_046232	C8orf69	RefSeq	522	chr8	-	96219234	96228602		CATCCAGAAGACCCCCTCCCTCTTCCCTGAGCTCTGTTTCTTCCATGAGGTTGAAGAAAA	intergenic							32956	18353.6	15.1256	13.9696	35089	34300.7	29478.2	19177.1	17959.6	17924.2	15.2162	14.9894	15.1712	14.0098	13.921	13.9781
ASHGA5P048855	0.00298463	0.0181501	2.25946	up	noncoding	uc002bkb.3	LOC388152	UCSC_knowngene	2557	chr15	-	84868063	84898920	ENST00000335068, ENST00000400817, uc002bkc.3, uc002blo.2	GCCCCGCCCCAGCGCAGTGCCGGCCACACCCATGCACTGAAGCTCCTCCCTGCCACACCC	intergenic							6434.33	3333.49	12.6459	11.4699	6783.18	6969.8	5550.01	3255.42	2676.91	4068.14	12.7708	12.5027	12.6643	11.3988	11.2264	11.7846
ASHGA5P023689	0.00197319	0.0143237	2.50876	up	noncoding	HMlincRNA152-	HMlincRNA152	LincRNAs identified by Khalil et al	10779	chr6	-	132581948	132592727		TGTGTGTGTGTGAGACTGTGCATGCATGTGTGTGTCCTCATTAGAGGAAAAACAGAAACT	intergenic							33939.7	16248.5	15.1372	13.8102	27034.4	45263	29521.7	16010.6	16816.5	15918.4	14.8052	15.4321	15.1744	13.7511	13.8449	13.8346
ASHGA5P023585	0.000283181	0.00518305	4.36489	up	noncoding	ENST00000584916	RP11-277J6.3	GENCODE	403	chr17	-	71658706	71659987		AGCAATGCAGGAGGAAGAATGAATCAGCTTTGTAACCAGCTTCATCTGACGGCTTAGATG	intergenic							28.3901	12.7856	5.23577	3.10983	28.8268	28.7223	27.6214	14.9486	11.0859	12.3224	5.35582	4.92186	5.42964	3.26881	2.99712	3.06356
ASHGA5P054602	3.95849e-05	0.00224664	2.79825	up	noncoding	uc001ldf.3	EMX2OS	UCSC_knowngene	7025	chr10	-	119243803	119301924		CCCTCAGCCACCGCCTCCTCCTCCACCAGCACCACTCCCTCCGGGGCACCCCGGTCCCTG	bidirectional	NM_001165924	EMX2	homeobox protein EMX2 isoform 2	+	119301955	119309057	27032.1	11615.9	14.7968	13.3123	26930.7	31608.3	22557.3	12927.5	11123.9	10796.3	14.793	14.8825	14.7149	13.4283	13.2575	13.2512
ASHGA5P054602	3.95849e-05	0.00224664	2.79825	up	noncoding	uc001ldf.3	EMX2OS	UCSC_knowngene	7025	chr10	-	119243803	119301924		CCCTCAGCCACCGCCTCCTCCTCCACCAGCACCACTCCCTCCGGGGCACCCCGGTCCCTG	bidirectional	NM_004098	EMX2	homeobox protein EMX2 isoform 1	+	119301955	119309057	27032.1	11615.9	14.7968	13.3123	26930.7	31608.3	22557.3	12927.5	11123.9	10796.3	14.793	14.8825	14.7149	13.4283	13.2575	13.2512
ASHGA5P028132	0.000602927	0.00751997	2.86109	up	noncoding	TCONS_00010078	XLOC_004536	LincRNAs identified by Cabili et al	347	chr5	+	124298626	124311044		TGTCTTTTGAAAGAGCATCTCTCAACCTAGTGTGTCTGGAATTGGTGGGTTCTTGGTCTC	intergenic							635.63	270.02	9.30226	7.7857	621.797	667.56	617.533	270.866	262.198	276.996	9.39707	9.01364	9.49607	7.70913	7.87118	7.77678
ASHGA5P015703	0.0354584	0.088294	2.10125	up	noncoding	ENST00000422764	RP11-384P7.6	GENCODE	399	chr9	-	33732972	33738414		ATGCAGCAAGGACTGTTAAAAATCTCCCAAGGCAGAGACTTTTAGGCCTACATGTACTTA	intergenic							4455.68	2240.29	11.9691	10.8979	4139.25	6991.31	2236.48	2241.3	2120	2359.55	12.0666	12.5061	11.3347	10.8377	10.9095	10.9464
ASHGA5P019215	0.000834477	0.00887376	2.96392	up	noncoding	ENST00000473454	CCDC162P	GENCODE	547	chr6	+	109665189	109676266		ATGCCCAGCGGTCAGCTGTCCCCATGGGCTCGTCAGGCGGTACCTATTAAACACAAAAAA	intergenic							224.934	105.779	7.91417	6.34666	239.742	234.911	200.15	119.22	87.8088	110.307	8.12922	7.61002	8.00327	6.45272	6.2004	6.38687
ASHGA5P036503	1.15178e-06	0.000772872	4.10727	up	noncoding	TCONS_00027180	XLOC_013220	LincRNAs identified by Cabili et al	288	chr19	-	10349735	10361691		CCGTGCCCTTTTGCAGTCAACCTCTCCTGTCCCAATATTTCACCGTCCCTATAGTTTTTT	intergenic							4583.06	1273.53	12.1171	10.0789	4305.53	5760.79	3682.87	1324.16	1208.02	1288.41	12.1198	12.186	12.0455	10.0797	10.1015	10.0556
ASHGA5P046052	0.00253015	0.0165654	2.50452	up	noncoding	NR_033913	LOC100128593	RefSeq	2702	chr9	+	139640612	139644363		ATTAAATATAAAAAGTCCCTGAAAGCCTTTTGAAAAAGGCTCCCACCTCCTCCTGGCCCA	natural antisense	NM_198946	LCN6	epididymal-specific lipocalin-6 precursor	-	139638468	139642980	581.884	283.315	9.18378	7.85924	622.77	567.763	555.118	300.505	251.873	297.567	9.39948	8.79422	9.35763	7.8732	7.81256	7.89198
ASHGA5P026572	0.00269058	0.0170639	2.49814	up	noncoding	ENST00000534517	RP11-802E16.3	GENCODE	664	chr11	+	67820289	67821229		TCTGTGGTAGCAGAAATATATGCACAAAAAACAATTCAAATAAGAGTTCAGAGTAAAAAA	natural antisense	NM_001277	CHKA	choline kinase alpha isoform a	-	67820325	67888858	574.568	280.913	9.15403	7.83317	582.2	684.037	457.467	297.807	312.409	232.523	9.31018	9.05022	9.10168	7.85701	8.13721	7.5053
ASHGA5P026572	0.00269058	0.0170639	2.49814	up	noncoding	ENST00000534517	RP11-802E16.3	GENCODE	664	chr11	+	67820289	67821229		TCTGTGGTAGCAGAAATATATGCACAAAAAACAATTCAAATAAGAGTTCAGAGTAAAAAA	natural antisense	NM_212469	CHKA	choline kinase alpha isoform b	-	67820325	67888858	574.568	280.913	9.15403	7.83317	582.2	684.037	457.467	297.807	312.409	232.523	9.31018	9.05022	9.10168	7.85701	8.13721	7.5053
ASHGA5P049516	0.0334627	0.0846173	2.08834	up	noncoding	ENST00000497774	C17orf76-AS1	GENCODE	1662	chr17	+	16342324	16345309	ENST00000480811	ACTTATTCGACTGTCCTGATGATACTTGTAATAGGAAGTGCCGTCAGAAGCGATAACTGA	intergenic							57.92	42.4504	6.00726	4.9449	32.2379	97.2271	44.2949	40.8375	33.6721	52.8417	5.50209	6.48228	6.0374	4.83061	4.71278	5.2913
ASHGA5P033378	2.47542e-05	0.00184244	4.6304	up	noncoding	NR_037709	TEN1-CDK3	RefSeq	3330	chr17	+	73975297	74002080		TAAGACAGGACTGTGGCTTTAAGACCCTCCTGACCCCTGACCTCTGCCCCCAGTGGCCCT	exon sense-overlapping	NM_001113324	TEN1	CST complex subunit TEN1	+	73975297	73996667	40435.4	10883.3	15.4297	13.2186	42686.2	39866.6	38753.3	10807.9	11194.8	10647.3	15.4767	15.2457	15.5668	13.1641	13.2643	13.2275
ASHGA5P033378	2.47542e-05	0.00184244	4.6304	up	noncoding	NR_037709	TEN1-CDK3	RefSeq	3330	chr17	+	73975297	74002080		TAAGACAGGACTGTGGCTTTAAGACCCTCCTGACCCCTGACCTCTGCCCCCAGTGGCCCT	exon sense-overlapping	NM_001258	CDK3	cyclin-dependent kinase 3	+	73996986	74002080	40435.4	10883.3	15.4297	13.2186	42686.2	39866.6	38753.3	10807.9	11194.8	10647.3	15.4767	15.2457	15.5668	13.1641	13.2643	13.2275
ASHGA5P033378	2.47542e-05	0.00184244	4.6304	up	noncoding	NR_037709	TEN1-CDK3	RefSeq	3330	chr17	+	73975297	74002080		TAAGACAGGACTGTGGCTTTAAGACCCTCCTGACCCCTGACCTCTGCCCCCAGTGGCCCT	natural antisense	NM_001185039	ACOX1	peroxisomal acyl-coenzyme A oxidase 1 isoform c	-	73937588	73975515	40435.4	10883.3	15.4297	13.2186	42686.2	39866.6	38753.3	10807.9	11194.8	10647.3	15.4767	15.2457	15.5668	13.1641	13.2643	13.2275
ASHGA5P033378	2.47542e-05	0.00184244	4.6304	up	noncoding	NR_037709	TEN1-CDK3	RefSeq	3330	chr17	+	73975297	74002080		TAAGACAGGACTGTGGCTTTAAGACCCTCCTGACCCCTGACCTCTGCCCCCAGTGGCCCT	natural antisense	NM_004035	ACOX1	peroxisomal acyl-coenzyme A oxidase 1 isoform a	-	73937588	73975515	40435.4	10883.3	15.4297	13.2186	42686.2	39866.6	38753.3	10807.9	11194.8	10647.3	15.4767	15.2457	15.5668	13.1641	13.2643	13.2275
ASHGA5P033378	2.47542e-05	0.00184244	4.6304	up	noncoding	NR_037709	TEN1-CDK3	RefSeq	3330	chr17	+	73975297	74002080		TAAGACAGGACTGTGGCTTTAAGACCCTCCTGACCCCTGACCTCTGCCCCCAGTGGCCCT	natural antisense	NM_007292	ACOX1	peroxisomal acyl-coenzyme A oxidase 1 isoform b	-	73937588	73975515	40435.4	10883.3	15.4297	13.2186	42686.2	39866.6	38753.3	10807.9	11194.8	10647.3	15.4767	15.2457	15.5668	13.1641	13.2643	13.2275
ASHGA5P046481	3.75391e-05	0.00218726	54.6789	up	noncoding	ENST00000439592	DMD-AS3	GENCODE	293	chrX	+	32773056	32774517		ACTTGCTTCTACAATGACAAAGTACCCAAAGCTAAATGTGAATGTCTAGTAGGTCAGAAA	intronic antisense	NM_000109	DMD	dystrophin Dp427c isoform	-	31137344	33357726	323.418	5.99074	8.24455	2.47164	261.314	544.474	164.466	6.28955	6.68266	5	8.24739	8.73112	7.75515	2.49613	2.57601	2.34278
ASHGA5P046481	3.75391e-05	0.00218726	54.6789	up	noncoding	ENST00000439592	DMD-AS3	GENCODE	293	chrX	+	32773056	32774517		ACTTGCTTCTACAATGACAAAGTACCCAAAGCTAAATGTGAATGTCTAGTAGGTCAGAAA	intronic antisense	NM_004006	DMD	dystrophin Dp427m isoform	-	31137344	33229673	323.418	5.99074	8.24455	2.47164	261.314	544.474	164.466	6.28955	6.68266	5	8.24739	8.73112	7.75515	2.49613	2.57601	2.34278
ASHGA5P046481	3.75391e-05	0.00218726	54.6789	up	noncoding	ENST00000439592	DMD-AS3	GENCODE	293	chrX	+	32773056	32774517		ACTTGCTTCTACAATGACAAAGTACCCAAAGCTAAATGTGAATGTCTAGTAGGTCAGAAA	intronic antisense	NM_004007	DMD	dystrophin Dp427l isoform	-	31137344	33038317	323.418	5.99074	8.24455	2.47164	261.314	544.474	164.466	6.28955	6.68266	5	8.24739	8.73112	7.75515	2.49613	2.57601	2.34278
ASHGA5P046481	3.75391e-05	0.00218726	54.6789	up	noncoding	ENST00000439592	DMD-AS3	GENCODE	293	chrX	+	32773056	32774517		ACTTGCTTCTACAATGACAAAGTACCCAAAGCTAAATGTGAATGTCTAGTAGGTCAGAAA	intronic antisense	NM_004009	DMD	dystrophin Dp427p1 isoform	-	31137344	33146545	323.418	5.99074	8.24455	2.47164	261.314	544.474	164.466	6.28955	6.68266	5	8.24739	8.73112	7.75515	2.49613	2.57601	2.34278
ASHGA5P046481	3.75391e-05	0.00218726	54.6789	up	noncoding	ENST00000439592	DMD-AS3	GENCODE	293	chrX	+	32773056	32774517		ACTTGCTTCTACAATGACAAAGTACCCAAAGCTAAATGTGAATGTCTAGTAGGTCAGAAA	intronic antisense	NM_004010	DMD	dystrophin Dp427p2 isoform	-	31137344	33146544	323.418	5.99074	8.24455	2.47164	261.314	544.474	164.466	6.28955	6.68266	5	8.24739	8.73112	7.75515	2.49613	2.57601	2.34278
ASHGA5P027276	0.00920686	0.0367504	2.3613	up	noncoding	TCONS_00011749	XLOC_005214	LincRNAs identified by Cabili et al	745	chr6	+	26675092	26687948	ENST00000562904, TCONS_00011747, TCONS_00011750, TCONS_00011751, TCONS_00011752, TCONS_00012443, TCONS_00012444	GCTCCCTCTTGGCATTCAGTATAGTGTAGATCTACCATGTAATTAATTCTCTGTTTCTTT	intergenic							2895.66	1326.85	11.3747	10.1351	3039.18	4080.25	1567.54	1381.58	1224.06	1374.9	11.5988	11.6743	10.851	10.1318	10.121	10.1525
ASHGA5P021473	2.02642e-05	0.00170952	17.3978	up	noncoding	ENST00000533008	RP11-702H23.4	GENCODE	344	chr11	+	74108697	74196787		CCACGCATAGAAAAAAACAGATTCTACTTGGTTCTAGCTGAAGTATTATCAACTCCAAAT	intronic antisense	NM_005472	KCNE3	potassium voltage-gated channel subfamily E member 3	-	74165885	74178600	391.381	32.4709	8.66077	4.53994	369.835	436.577	367.73	35.9602	25.2156	36.2369	8.71326	8.4484	8.82065	4.63658	4.26693	4.7163
ASHGA5P021473	2.02642e-05	0.00170952	17.3978	up	noncoding	ENST00000533008	RP11-702H23.4	GENCODE	344	chr11	+	74108697	74196787		CCACGCATAGAAAAAAACAGATTCTACTTGGTTCTAGCTGAAGTATTATCAACTCCAAAT	intronic antisense	NM_173582	PGM2L1	glucose 1,6-bisphosphate synthase	-	74041360	74109502	391.381	32.4709	8.66077	4.53994	369.835	436.577	367.73	35.9602	25.2156	36.2369	8.71326	8.4484	8.82065	4.63658	4.26693	4.7163
ASHGA5P053111	0.000236247	0.00474956	5.17434	up	noncoding	uc010las.1	PMS2L2	UCSC_knowngene	803	chr7	+	72476679	72515008	uc010lcy.1	AGAGCTCGAGGTGAGCTGGGCTCGCGGTCGCCCCTCTCGCTCGCCCTCTTTGAGAACCAC	bidirectional	ENST00000308103	STAG3L3	stromal antigen 3-like 3 [Source:HGNC Symbol;Acc:33845]	-	72467912	72476440	999.531	236.152	9.95222	7.58085	1041.77	1005.03	951.797	243.479	230.238	234.739	10.1318	9.58505	10.1398	7.54609	7.67624	7.5202
ASHGA5P053111	0.000236247	0.00474956	5.17434	up	noncoding	uc010las.1	PMS2L2	UCSC_knowngene	803	chr7	+	72476679	72515008	uc010lcy.1	AGAGCTCGAGGTGAGCTGGGCTCGCGGTCGCCCCTCTCGCTCGCCCTCTTTGAGAACCAC	bidirectional	ENST00000426587	STAG3L3	stromal antigen 3-like 3 [Source:HGNC Symbol;Acc:33845]	-	72467912	72476440	999.531	236.152	9.95222	7.58085	1041.77	1005.03	951.797	243.479	230.238	234.739	10.1318	9.58505	10.1398	7.54609	7.67624	7.5202
ASHGA5P053111	0.000236247	0.00474956	5.17434	up	noncoding	uc010las.1	PMS2L2	UCSC_knowngene	803	chr7	+	72476679	72515008	uc010lcy.1	AGAGCTCGAGGTGAGCTGGGCTCGCGGTCGCCCCTCTCGCTCGCCCTCTTTGAGAACCAC	bidirectional	ENST00000436857	STAG3L3	stromal antigen 3-like 3 [Source:HGNC Symbol;Acc:33845]	-	72440226	72476244	999.531	236.152	9.95222	7.58085	1041.77	1005.03	951.797	243.479	230.238	234.739	10.1318	9.58505	10.1398	7.54609	7.67624	7.5202
ASHGA5P053111	0.000236247	0.00474956	5.17434	up	noncoding	uc010las.1	PMS2L2	UCSC_knowngene	803	chr7	+	72476679	72515008	uc010lcy.1	AGAGCTCGAGGTGAGCTGGGCTCGCGGTCGCCCCTCTCGCTCGCCCTCTTTGAGAACCAC	bidirectional	ENST00000448173	STAG3L3	stromal antigen 3-like 3 [Source:HGNC Symbol;Acc:33845]	-	72469006	72476438	999.531	236.152	9.95222	7.58085	1041.77	1005.03	951.797	243.479	230.238	234.739	10.1318	9.58505	10.1398	7.54609	7.67624	7.5202
ASHGA5P053111	0.000236247	0.00474956	5.17434	up	noncoding	uc010las.1	PMS2L2	UCSC_knowngene	803	chr7	+	72476679	72515008	uc010lcy.1	AGAGCTCGAGGTGAGCTGGGCTCGCGGTCGCCCCTCTCGCTCGCCCTCTTTGAGAACCAC	bidirectional	ENST00000569650	STAG3L3	stromal antigen 3-like 3 [Source:HGNC Symbol;Acc:33845]	-	72469015	72476308	999.531	236.152	9.95222	7.58085	1041.77	1005.03	951.797	243.479	230.238	234.739	10.1318	9.58505	10.1398	7.54609	7.67624	7.5202
ASHGA5P052036	2.77071e-05	0.00190792	2.32793	up	noncoding	ENST00000513690	RP11-380D23.2	GENCODE	446	chr4	-	111516670	111536614		CGGTGCAGTCAGTCCCCTCGCCCCTCCCGCCCCTGCACGGGTCCCCCTCTAGCCGTCGCT	intergenic							75607.2	44121.8	16.4392	15.2202	78614.7	79489.9	68716.9	46228.2	42626.2	43511.1	16.4914	16.3707	16.4555	15.2642	15.1322	15.2642
ASHGA5P057578	0.000590241	0.00744227	2.29852	up	noncoding	TCONS_00019359	XLOC_009185	LincRNAs identified by Cabili et al	275	chr11	+	68039633	68052051		TTTTGAGCAGTCCTTCTGACCCTCGTGGCTTCTCCTGCTCCAAGGCCAAGCTCGGGACCC	intergenic							892.321	454.192	9.77636	8.57565	901.991	967.783	807.19	477.371	422.999	462.207	9.90911	9.53376	9.88621	8.58341	8.57836	8.56519
ASHGA5P038851	3.2477e-05	0.0020566	19.9982	up	noncoding	ENST00000468961	THOC7-AS1	GENCODE	673	chr3	+	63846320	63847495		CTCTTCCTCTAATCATTCTGCACATAACAGAGACAGTGTGTATGTGTGTGTGTGTTTTTT	intronic antisense	NM_025075	THOC7	THO complex subunit 7 homolog	-	63819545	63849597	16737.9	988.45	14.0502	9.72835	13719.1	17720.6	18774	1057.18	982.823	925.352	13.7805	13.935	14.4349	9.76107	9.82856	9.59543
ASHGA5P033478	0.000596766	0.00749057	5.76675	up	noncoding	ENST00000579647	CBX3P2	GENCODE	1429	chr18	-	2652168	2655394		GGAAAAGCTTTCTGTAGCTGCTTCATTTACCAGAAAAGAATATTTGGTTCCATGGTATAT	bidirectional	NM_015295	SMCHD1	structural maintenance of chromosomes flexible hinge domain-containing protein 1	+	2655885	2805015	1873.76	394.251	10.8566	8.3288	1698.31	2201.57	1721.41	430.072	459.507	293.174	10.8187	10.7544	10.9966	8.4161	8.70501	7.8653
ASHGA5P045598	0.00280774	0.0174931	4.48045	up	noncoding	NR_026663	GLIS3-AS1	RefSeq	730	chr9	+	3898645	3901248		TAAGAGGACAAAACGGAAGAGACATCGATAAGGAGAGCCGGTCCTTGGAATATTTTCCTG	natural antisense	NM_001042413	GLIS3	zinc finger protein GLIS3 isoform a	-	3824127	4300035	23.4497	8.46185	4.84709	2.68344	16.1961	38.7463	15.4067	7.42475	5	12.9608	4.59553	5.30943	4.63631	2.56667	2.34646	3.13719
ASHGA5P045598	0.00280774	0.0174931	4.48045	up	noncoding	NR_026663	GLIS3-AS1	RefSeq	730	chr9	+	3898645	3901248		TAAGAGGACAAAACGGAAGAGACATCGATAAGGAGAGCCGGTCCTTGGAATATTTTCCTG	natural antisense	NM_152629	GLIS3	zinc finger protein GLIS3 isoform b	-	3824127	4152183	23.4497	8.46185	4.84709	2.68344	16.1961	38.7463	15.4067	7.42475	5	12.9608	4.59553	5.30943	4.63631	2.56667	2.34646	3.13719
ASHGA5P023593	0.0138974	0.0475156	3.08981	up	noncoding	NR_047534	CDKN2B-AS1	RefSeq	1910	chr9	+	21994789	22121093		ATCTAACTCCAAAGAAACCATCAGAGGTAACAGGTGGAGAACTTCAGTAGAGGAAGTGGC	intronic antisense	NM_004936	CDKN2B	cyclin-dependent kinase 4 inhibitor B isoform 1	-	22002901	22009312	18.9036	11.8586	4.62679	2.99927	19.963	25.3684	11.3794	17.1581	5	13.4176	4.87503	4.76607	4.23927	3.46416	2.34646	3.18719
ASHGA5P023593	0.0138974	0.0475156	3.08981	up	noncoding	NR_047534	CDKN2B-AS1	RefSeq	1910	chr9	+	21994789	22121093		ATCTAACTCCAAAGAAACCATCAGAGGTAACAGGTGGAGAACTTCAGTAGAGGAAGTGGC	intronic antisense	NM_078487	CDKN2B	cyclin-dependent kinase 4 inhibitor B isoform 2	-	22002901	22009312	18.9036	11.8586	4.62679	2.99927	19.963	25.3684	11.3794	17.1581	5	13.4176	4.87503	4.76607	4.23927	3.46416	2.34646	3.18719
ASHGA5P023200	0.000335914	0.00564627	2.40054	up	noncoding	NR_027697	FLJ39653	RefSeq	2496	chr4	+	16228285	16259810		GGTCCTGCAGTCAAAACTTCTTTGAGACGATGCTGTCGGCCTTGGCCAATCGGAGAATCG	bidirectional	NM_153365	TAPT1	transmembrane anterior posterior transformation protein 1 homolog	-	16162127	16228161	60.4392	41.5492	6.2057	4.94234	57.9227	69.5135	53.8815	41.52	43.2129	39.9147	6.26833	6.05616	6.2926	4.85592	5.1048	4.86628
ASHGA5P016814	0.000538637	0.00709524	6.60846	up	noncoding	ENST00000434533	RP11-144G6.4	GENCODE	234	chr10	+	47186202	47192185	ENST00000415661, ENST00000451760	AGGGTTTTGTGACTGATGGGGAGACTGCAGTCAAATAAAACAGATACTACACGCACTCGT	natural antisense	NM_001190810	AGAP9	arf-GAP with GTPase, ANK repeat and PH domain-containing protein 9	-	47191843	47213626	33.5097	8.4101	5.4313	2.70699	33.7786	40.5823	26.1684	7.39143	12.8389	5	5.56314	5.3732	5.35758	2.56468	3.21351	2.34278
ASHGA5P053152	0.00461248	0.0237485	3.38156	up	noncoding	ENST00000438324	RP5-1185I7.1	GENCODE	558	chr7	+	77619736	77624488		CTGTAGAATCGCCCGTATTGTGGATTTGGCCATTGCTTCTACATGATGATAAGAGAATGT	intergenic							82.1525	40.374	6.61551	4.85782	82.5101	86.0657	77.8817	44.1137	48.3206	28.6879	6.73355	6.32773	6.78525	4.95112	5.27338	4.34897
ASHGA5P022899	0.000667275	0.00786512	2.21572	up	noncoding	NR_023348	GAS8	RefSeq	3267	chr16	+	90089007	90111352		ATGAGCAAGGAGCAGGTGAAGTTGAGTCCTCCCTCTTTCTTCCTTGCCTTTCGCCGGCCA	exon sense-overlapping	NM_001481	GAS8	growth arrest-specific protein 8	+	90089007	90111379	2731.7	1413.47	11.3767	10.2289	2741.56	2873.62	2579.9	1492.49	1349.91	1398.01	11.4614	11.1456	11.523	10.243	10.267	10.1767
ASHGA5P022899	0.000667275	0.00786512	2.21572	up	noncoding	NR_023348	GAS8	RefSeq	3267	chr16	+	90089007	90111352		ATGAGCAAGGAGCAGGTGAAGTTGAGTCCTCCCTCTTTCTTCCTTGCCTTTCGCCGGCCA	intronic antisense	NM_001214	C16orf3	uncharacterized protein C16orf3	-	90095315	90096309	2731.7	1413.47	11.3767	10.2289	2741.56	2873.62	2579.9	1492.49	1349.91	1398.01	11.4614	11.1456	11.523	10.243	10.267	10.1767
ASHGA5P016251	1.24288e-05	0.0014657	3.40365	up	noncoding	ENST00000428557	RP4-756H11.3	GENCODE	304	chr7	+	66119572	66134842		CGCAGAGTAGCCTGCCCCTCCTGTGACTTCCCCGTCTCGGGAAATGGCACCATCATCATC	intergenic							6123.53	2096.04	12.5653	10.7982	6240.42	6968.94	5161.24	2214.22	2069.17	2004.74	12.6503	12.5016	12.544	10.8218	10.8716	10.7012
ASHGA5P020148	0.00307737	0.018438	2.59061	up	noncoding	ENST00000508743	RP11-463M16.4	GENCODE	738	chr17	-	46952221	46986345		TTGTCTTTTGTTCCCAGAACAGGGATTGTCAATGAGGTAGATCAGATTCCCATTCGACGG	intronic antisense	NM_001002027	ATP5G1	ATP synthase lipid-binding protein, mitochondrial precursor	+	46970147	46973232	4317.9	1910.96	12.0247	10.6514	3394.54	5393.58	4165.59	2248.01	1950.91	1533.96	11.7691	12.083	12.2219	10.843	10.7947	10.3164
ASHGA5P020148	0.00307737	0.018438	2.59061	up	noncoding	ENST00000508743	RP11-463M16.4	GENCODE	738	chr17	-	46952221	46986345		TTGTCTTTTGTTCCCAGAACAGGGATTGTCAATGAGGTAGATCAGATTCCCATTCGACGG	intronic antisense	NM_005175	ATP5G1	ATP synthase lipid-binding protein, mitochondrial precursor	+	46970147	46973232	4317.9	1910.96	12.0247	10.6514	3394.54	5393.58	4165.59	2248.01	1950.91	1533.96	11.7691	12.083	12.2219	10.843	10.7947	10.3164
ASHGA5P020148	0.00307737	0.018438	2.59061	up	noncoding	ENST00000508743	RP11-463M16.4	GENCODE	738	chr17	-	46952221	46986345		TTGTCTTTTGTTCCCAGAACAGGGATTGTCAATGAGGTAGATCAGATTCCCATTCGACGG	intronic antisense	NM_023079	UBE2Z	ubiquitin-conjugating enzyme E2 Z	+	46985730	47006422	4317.9	1910.96	12.0247	10.6514	3394.54	5393.58	4165.59	2248.01	1950.91	1533.96	11.7691	12.083	12.2219	10.843	10.7947	10.3164
ASHGA5P044216	0.00012808	0.00365036	23.7969	up	noncoding	ENST00000534914	LINC00467	GENCODE	429	chr1	+	211556144	211570206		CTGCCAAGGGAAAAATTAAGAAGAAGAGAAGAGAGAAAACAAATAAATGGGAAAAAAGAA	intergenic							155.835	9.37868	7.40944	2.83674	142.343	204.21	120.952	6.09897	15.0463	6.9908	7.46149	7.41622	7.3506	2.48347	3.45794	2.5688
ASHGA5P056921	1.96264e-05	0.00170952	2.72357	up	noncoding	TCONS_00010575	XLOC_005099	LincRNAs identified by Cabili et al	3031	chr5	-	177387461	177391278	TCONS_00010576, TCONS_00011098	TGCCACGCTCCCTCCTCAGTGTCACCATGGCCATCGTTCCCTGCTCCCTCCTCAGTGTCA	intergenic							40788.3	18520.7	15.4323	13.9868	42871.8	44368.1	35125.1	20160.6	18709.8	16691.7	15.4875	15.396	15.4133	14.0818	13.9869	13.8916
ASHGA5P035593	0.000588288	0.00743187	3.28778	up	noncoding	TCONS_00015979	XLOC_007354	LincRNAs identified by Cabili et al	810	chr9	+	38949736	38968330	TCONS_00016774, TCONS_00016775	TCTTCACAGATCCCGGAACAAAGGACAAAGGATAGAACTAAAAGCGCCCCCCACCCGCCG	intergenic							5629.8	1971.93	12.4206	10.7034	6434.79	6076.4	4378.23	2145.49	2011.75	1758.56	12.7013	12.269	12.2914	10.7669	10.84	10.5034
ASHGA5P050574	1.17732e-06	0.000772872	5.27452	up	noncoding	uc002svn.2	LOC285033	UCSC_knowngene	1835	chr2	+	96874140	96907701		CAGGCGGCCAGCAGCCTCCGCGGGAGCATGCCGCCTCCCGCAGGGCCCGCCGCGAGCTTC	natural antisense	NM_020151	STARD7	stAR-related lipid transfer protein 7, mitochondrial precursor	-	96850602	96874573	43.3302	15.2015	5.77493	3.37589	40.864	51.8178	37.3088	16.3138	14.4527	14.8378	5.81362	5.68234	5.82884	3.39507	3.39623	3.33638
ASHGA5P057422	0.00153357	0.0122954	2.85451	up	noncoding	TCONS_00017180	XLOC_007992	LincRNAs identified by Cabili et al	307	chrX	+	56098008	56231479		GAATGTTTAGAAGCTGGGCAGAGAAATCGAGCTGCAAAATGACCTACAGATATTACAGTT	intron sense-overlapping	ENST00000433279	AL353698.1	Uncharacterized protein [Source:UniProtKB/TrEMBL;Acc:E7EML2]	+	56100756	56102014	2401.46	970.047	11.201	9.6878	2502.78	2523.96	2177.65	932.989	1115.39	861.762	11.3431	10.9571	11.3029	9.5775	9.9916	9.4943
ASHGA5P037672	0.00587395	0.0275699	5.02664	up	noncoding	ENST00000450365	LL22NC03-13G6.2	GENCODE	519	chr22	-	34604129	34605251		CAAAAGCATAACTGTGCATTCAATATTCATAGAAAGGGTCTGTGTGTGGTAGGAAAGAGA	intergenic							116.268	38.9395	7.03142	4.70182	84.5457	141.939	122.318	63.0175	27.0282	26.773	6.76381	6.96259	7.36785	5.49285	4.37057	4.24205
ASHGA5P015431	0.00232708	0.0158142	6.68094	up	noncoding	ENST00000420180	RP1-76B20.12	GENCODE	244	chr22	-	30107808	30115703		GTTGACCAAGTGCTGGGATTACCGAATGGGAGCCACCATGCCCAGTCTTTACTCAAAATT	bidirectional	NM_182527	CABP7	calcium-binding protein 7	+	30116343	30127820	613.235	117.433	9.2433	6.50325	644.586	479.833	715.288	129.424	130.651	92.2236	9.44982	8.57166	9.70844	6.58107	6.80343	6.12526
ASHGA5P022155	4.5173e-05	0.00238852	2.66992	up	noncoding	ENST00000550680	RP11-1103G16.1	GENCODE	471	chr14	-	30907211	30943433		TTTTTGCTGCTTCTTTCCCTACCTCCTCATTTCCGAAGAACTAAGGTTAAACCATGACCA	intergenic							2188.6	941.039	11.0727	9.65589	2081.46	2561.11	1923.24	1051.7	865.172	906.247	11.1012	10.9773	11.1397	9.75685	9.64819	9.56264
ASHGA5P056596	0.0019968	0.0144191	2.59309	up	noncoding	TCONS_00006456	XLOC_003067	LincRNAs identified by Cabili et al	366	chr3	-	24079060	24086331		TTAGAAGTCTCTGCCACTGCTTATCATAATGTGTGTGGCACCTCTCGTCTCTCTCTTTCT	intergenic							203.028	109.83	7.77513	6.40046	189.164	211.771	208.15	123.849	89.493	116.149	7.81096	7.46286	8.05158	6.5094	6.22948	6.46249
ASHGA5P040531	0.000170043	0.00410615	4.86931	up	noncoding	ENST00000514201	CTC-325J23.2	GENCODE	549	chr5	-	79926131	79927409		ACTCGGATATCCCTTTGCTCCTGAGCCTGTGCTTCCTGTAGAGTCTTGATTTTAATTGTA	intron sense-overlapping	NM_000791	DHFR	dihydrofolate reductase	-	79922044	79950800	1573.66	386.859	10.6119	8.32822	1620.71	1608.79	1491.49	428.94	352.54	379.097	10.7608	10.2887	10.7864	8.4124	8.31691	8.25534
ASHGA5P034899	0.00141791	0.0117738	2.33355	up	noncoding	ENST00000439180	MYCNOS	GENCODE	496	chr2	-	16080242	16081360	ENST00000453400	GACCCAGATTGCGACCGCGGCGGCCTCGCCCTGCCTAATCCCCCCCTCTTCTTCCTCCAG	intronic antisense	NM_005378	MYCN	N-myc proto-oncogene protein	+	16080682	16087129	5720.86	2844.6	12.4628	11.2403	6056.41	5980.02	5126.15	3243	2799.15	2491.66	12.6109	12.2484	12.5292	11.3918	11.3033	11.0258
ASHGA5P043266	0.000526238	0.00702851	2.7837	up	noncoding	uc003vcr.1	AF520792	UCSC_knowngene	999	chr7	-	104754466	104755465		CTGACATAATTGTGATTTATTAACATGAATTAAAATGCCCAACCAGTGCTTCAGTGTGAC	natural antisense	NM_018682	MLL5	histone-lysine N-methyltransferase MLL5	+	104654636	104754532	1852.2	763.741	10.8253	9.34826	1914.48	2215.61	1426.53	862.813	764.326	664.083	10.9931	10.7657	10.717	9.4634	9.46845	9.11293
ASHGA5P043266	0.000526238	0.00702851	2.7837	up	noncoding	uc003vcr.1	AF520792	UCSC_knowngene	999	chr7	-	104754466	104755465		CTGACATAATTGTGATTTATTAACATGAATTAAAATGCCCAACCAGTGCTTCAGTGTGAC	natural antisense	NM_182931	MLL5	histone-lysine N-methyltransferase MLL5	+	104654636	104754532	1852.2	763.741	10.8253	9.34826	1914.48	2215.61	1426.53	862.813	764.326	664.083	10.9931	10.7657	10.717	9.4634	9.46845	9.11293
ASHGA5P028004	0.00583052	0.0274179	2.68135	up	noncoding	uc009zme.2	bpl 41-16	UCSC_knowngene	1433	chr12	+	52473479	52502034		GGCGCCCGGCTGCGCTCGGTGGTCGCGGCCTCCAGGCAGCCCCTGACTCCGAGCGGTCCG	intergenic							30.4104	21.0399	5.29319	3.87023	38.5727	30.402	22.2566	24.735	20.7666	17.6182	5.73975	4.99972	5.14009	4.05033	3.95989	3.60047
ASHGA5P051996	0.00015887	0.0040116	3.11607	up	noncoding	NR_038841	LOC100506746	RefSeq	1945	chr4	-	87846045	87856002		GAACCCTTTCACTTTACGGCGAGATTAAGCTCAGGGTCAAGTTCTGAGCAAAAAGTGTCA	exon sense-overlapping	ENST00000473559	C4orf36	chromosome 4 open reading frame 36 [Source:HGNC Symbol;Acc:28386]	-	87807624	87855884	38.7444	21.8873	5.58246	3.94274	36.7018	53.5086	26.0229	23.529	20.4118	21.721	5.67238	5.72598	5.34903	3.97121	3.93443	3.92258
ASHGA5P032720	0.00506394	0.0251461	2.29201	up	noncoding	ENST00000580125	RP11-498C9.17	GENCODE	958	chr17	-	79923507	79924465		TATCTGTCTAACATGCAAAAGGAGGGTTCTGAAACACCCTACCTGCCAGGAAGGTTTCTA	intergenic							14.3313	12.902	4.33077	3.13416	15.0137	14.0917	13.8884	11.7928	14.282	12.6311	4.49111	3.99278	4.50843	2.92358	3.37748	3.10141
ASHGA5P053453	0.00980047	0.0380766	2.4919	up	noncoding	ENST00000524286	RP11-600K15.1	GENCODE	721	chr8	-	69825397	69913747		AAAGGCCACGTGAGGACACAGCAAGAAAGTGGTCATCTGCAAGCGCAAAAGACAGGCCTC	intergenic							29.9648	21.3401	5.20019	3.88294	18.5752	46.7343	24.5847	18.9969	18.7785	26.2451	4.77736	5.55556	5.26764	3.63258	3.80587	4.21037
ASHGA5P032203	0.00437091	0.0230101	2.56521	up	noncoding	ENST00000580194	AC005324.6	GENCODE	541	chr17	-	15643941	15652506		TCCTCCATGTGGGCAGCTCATGCAGTCAGCTCAGCAGCTCTCCCTGCCTGGAATGGTCTG	intronic antisense	NM_178571	TBC1D26	TBC1 domain family member 26	+	15635590	15648098	1478.17	675.394	10.5277	9.16864	1590.88	1412.92	1430.71	708.427	715.43	602.324	10.7388	10.1239	10.7204	9.16856	9.37326	8.96411
ASHGA5P037294	0.0163077	0.0525155	2.26813	up	noncoding	NR_026812	RUNX1-IT1	RefSeq	1502	chr21	-	36410232	36411723		CCATGTTGAAGTGTAAACTCCACTCAGCTCCAGGAGGAATCGTGTTTTCTTTATCACCAG	intron sense-overlapping	NM_001754	RUNX1	runt-related transcription factor 1 isoform AML1c	-	36160097	36421595	101.693	66.4484	6.80291	5.62141	67.1665	155.249	82.6647	84.4095	66.2138	48.7218	6.46771	7.07633	6.8647	5.94481	5.75898	5.16044
ASHGA5P056390	0.00355906	0.0201068	2.2815	up	noncoding	TCONS_00003848	XLOC_001653	LincRNAs identified by Cabili et al	330	chr2	+	123801119	123804985		AGAAACTATAGCATAAAACAGAACAGCTGGTGGTGTGGCACTCATGCTGCAAACAGGAAG	intergenic							35.2525	27.8662	5.49968	4.3097	40.6071	37.8654	27.285	32.9632	25.8501	24.7852	5.80619	5.27932	5.41354	4.50645	4.3038	4.11886
ASHGA5P038093	0.00100857	0.00976537	2.61164	up	noncoding	ENST00000437047	AC034187.2	GENCODE	561	chr3	-	8615411	8634810		GTGGCCACAGTAGAATCTCTTTTCTCTTTCTTCTTTATTCCCTAAAGTCTTAAAGATAAC	intergenic							57.9991	37.4664	6.14175	4.7568	48.2048	71.9389	53.8536	46.7451	32.294	33.36	6.03241	6.10159	6.29126	5.03747	4.64676	4.58616
ASHGA5P014654	0.000294421	0.00527478	3.13664	up	noncoding	ENST00000412203	LEPREL1-AS1	GENCODE	730	chr3	+	189838752	189862635		CAAATCTAAGGAACACCTTCTACTTAAAATTGAAGTCTTCTGGGCTGGGTGTGGTGGCTC	intronic antisense	NM_001134418	LEPREL1	prolyl 3-hydroxylase 2 isoform b	-	189674516	189840226	1093.13	407.24	10.0464	8.39716	965.067	1480.68	833.634	441.647	318.8	461.272	10.0148	10.1892	9.93518	8.46073	8.16886	8.56189
ASHGA5P014654	0.000294421	0.00527478	3.13664	up	noncoding	ENST00000412203	LEPREL1-AS1	GENCODE	730	chr3	+	189838752	189862635		CAAATCTAAGGAACACCTTCTACTTAAAATTGAAGTCTTCTGGGCTGGGTGTGGTGGCTC	natural antisense	NM_018192	LEPREL1	prolyl 3-hydroxylase 2 isoform a precursor	-	189674516	189838908	1093.13	407.24	10.0464	8.39716	965.067	1480.68	833.634	441.647	318.8	461.272	10.0148	10.1892	9.93518	8.46073	8.16886	8.56189
ASHGA5P055775	0.00141148	0.0117614	2.69795	up	noncoding	uc021rjh.1	LOC100190939	UCSC_knowngene	2877	chr13	+	45961719	45965618		TTTTTAATAGAAAAACAAACAAAGACATGGATTTACTGTGCATATTAGCAGATCCATACT	intergenic							998.223	437.262	9.94631	8.51445	1034.04	1043.84	916.785	432.502	463.528	415.754	10.1202	9.64556	10.0731	8.42674	8.71716	8.39945
ASHGA5P023581	0.00655031	0.0295604	3.4028	up	noncoding	ENST00000584833	AL353997.3	GENCODE	563	chr17	+	18323395	18324540	ENST00000579363	AAGGCAGGAGGTGGATGATGCCCACCTGGCTGCCGATGACTTCTGCACCAAGTGAGGCTG	intergenic							39.2814	21.2649	5.64449	3.87777	47.6004	31.992	38.2516	18.1911	20.5103	25.0933	6.01536	5.06357	5.85454	3.55497	3.9412	4.13714
ASHGA5P049715	0.00186709	0.0138235	2.76952	up	noncoding	ENST00000573318	MRPL45P2	pseudogene	473	chr17	-	45560357	45569825	ENST00000312513, ENST00000425159, uc002ilq.3	TCATCTCTTTCAAAGGAGAGATGATAGAGAGAACTGATAGAGAGAACTGAACGAATGAAG								351.88	166.493	8.51038	7.04074	355.835	400.685	299.12	138.294	171.924	189.26	8.6623	8.32871	8.54012	6.68937	7.23444	7.19842
ASHGA5P053317	3.28932e-05	0.00206074	2.64388	up	noncoding	ENST00000416220	AC018642.1	GENCODE	561	chr7	-	131008444	131012538	ENST00000429067	TCAGGGTTTCCCACGTCGCTCGCTCCTTGACGGCTGACCGACACTGGGTCTGAGGTGTAA	intronic antisense	NM_001145354	MKLN1	muskelin isoform 1	+	130794854	131181398	300.833	148.961	8.2833	6.88065	260.284	385.821	256.395	158.293	147.037	141.552	8.24221	8.28211	8.32559	6.89691	6.98202	6.76301
ASHGA5P022898	0.000798464	0.00865218	2.82844	up	noncoding	ENST00000565049	RP11-293B20.1	pseudogene	1178	chr16	-	33489796	33500971		AGCGGTGAGTTAAATTACCTCTTTTCAGATATTGTCTTCATGCGAACTTGGTATCCTGTT								290.551	135.742	8.21678	6.71677	268.266	393.784	209.602	125.345	116.117	165.765	8.28481	8.30724	8.05829	6.52936	6.62163	6.99933
ASHGA5P037651	0.00936431	0.037062	2.97622	up	noncoding	ENST00000429350	CTA-85E5.10	GENCODE	902	chr22	-	30404730	30476219		AGAGGAACACACTGAATTTTAGCTATCTTTTCAAAAAGCGTGAAAAGGGAAGGTTAGATT	natural antisense	NM_021090	MTMR3	myotubularin-related protein 3 isoform c	+	30279157	30426857	16.6057	10.56	4.48884	2.91535	18.7099	19.6196	11.4876	7.39178	15.5184	8.76983	4.7878	4.42424	4.25447	2.5648	3.50414	2.67712
ASHGA5P037651	0.00936431	0.037062	2.97622	up	noncoding	ENST00000429350	CTA-85E5.10	GENCODE	902	chr22	-	30404730	30476219		AGAGGAACACACTGAATTTTAGCTATCTTTTCAAAAAGCGTGAAAAGGGAAGGTTAGATT	natural antisense	NM_153050	MTMR3	myotubularin-related protein 3 isoform a	+	30279157	30426857	16.6057	10.56	4.48884	2.91535	18.7099	19.6196	11.4876	7.39178	15.5184	8.76983	4.7878	4.42424	4.25447	2.5648	3.50414	2.67712
ASHGA5P037651	0.00936431	0.037062	2.97622	up	noncoding	ENST00000429350	CTA-85E5.10	GENCODE	902	chr22	-	30404730	30476219		AGAGGAACACACTGAATTTTAGCTATCTTTTCAAAAAGCGTGAAAAGGGAAGGTTAGATT	natural antisense	NM_153051	MTMR3	myotubularin-related protein 3 isoform b	+	30279157	30426857	16.6057	10.56	4.48884	2.91535	18.7099	19.6196	11.4876	7.39178	15.5184	8.76983	4.7878	4.42424	4.25447	2.5648	3.50414	2.67712
ASHGA5P029937	0.044117	0.102968	2.00613	up	noncoding	ENST00000560769	CTD-2033D15.1	GENCODE	281	chr15	-	39885780	39886432		AGTGAAAGTGAATCAGTATGATCGTACCTAATGAAACCCGTCTTTGGCCTGTGGCTGAGA	natural antisense	NM_003246	THBS1	thrombospondin-1 precursor	+	39873279	39889668	72.2408	58.536	6.42544	5.42103	54.8431	82.9624	78.917	66.4951	69.3104	39.8024	6.19258	6.28134	6.80241	5.57205	5.82948	4.86156
ASHGA5P046857	0.0100623	0.0387485	2.71851	up	noncoding	ENST00000418196	RP11-292F22.5	GENCODE	167	chr10	-	47570512	47573855		GAGGGCACTAGTGAGACTTTATACAATGGAATAAAATAACAAAATGTGCTGACAGCATTT	intergenic							10.6956	5.16752	3.82003	2.37721	11.8136	15.2704	5.00279	5.50256	5	5	4.16825	4.09485	3.19699	2.44239	2.34646	2.34278
ASHGA5P015968	0.0011873	0.010643	2.20435	up	noncoding	ENST00000425301	AC012309.4	GENCODE	170	chr19	-	37726503	37726976		GTGTAAAGTCCCATTGAAACCAGATTGCCGTAGTTCTCCAACATCACATCTCTGTATAAG	natural antisense	NM_152604	ZNF383	zinc finger protein 383	+	37717365	37734574	108.913	74.6672	6.97414	5.83379	104.926	123.227	98.5842	70.7727	77.1286	76.1001	7.06041	6.77511	7.08691	5.66667	5.99942	5.83527
ASHGA5P022337	0.00149283	0.0121136	3.62759	up	noncoding	ENST00000554815	RP11-509A17.3	GENCODE	427	chr15	+	20554570	20564419		GAGGCCCACGGTGCACCCCCAGCCCAGGCGACATCAACGGCCAGCCCCATACGCGTGAGG	intergenic							1266.31	417.338	10.3024	8.44339	1384.35	1212.94	1201.62	416.252	444.258	391.505	10.5486	9.87373	10.4849	8.36693	8.65295	8.31028
ASHGA5P016809	0.000189931	0.00431928	19.8169	up	noncoding	ENST00000434500	CCT6P1	pseudogene	1304	chr7	+	65216128	65228323		TAAGTTTATAAAGTGAATTCTGGCGTTTTTTACAAGAGTGCAGAAAGAGAAAAACTCATA								2803.42	162.129	11.3023	6.99362	1772.73	4754.9	1882.63	187.527	129.702	169.157	10.8886	11.9056	11.1126	7.15589	6.79411	7.03085
ASHGA5P019636	0.000106836	0.00339562	7.43274	up	noncoding	ENST00000497969	SUZ12P1	GENCODE	886	chr17	+	29058723	29085353		TGTTATCAAAAGTAGAGAAAATGAAAGGAGAGCAAGAATCTCATAGAAAAAGAGGAATCC	intergenic							352.45	64.4531	8.48922	5.59533	345.288	445.249	266.812	71.6529	70.1056	51.6007	8.6133	8.47435	8.38002	5.68383	5.84752	5.25463
ASHGA5P055444	0.00143943	0.0118462	2.74386	up	noncoding	NR_026656	LOC400043	RefSeq	1411	chr12	+	54519854	54526626		AGGGGGGGCTGTGGCGTGGGGGCTGAGGAGGGGCTAAGGCGGGAGGGGCGCCTCATCCCT	intergenic							199.277	100.125	7.71044	6.25424	150.287	291.09	156.453	125.937	88.2257	86.2131	7.5319	7.90695	7.69247	6.53665	6.20603	6.02003
ASHGA5P019242	0.0163554	0.0526292	2.49772	up	noncoding	ENST00000475089	RP4-798C17.6	GENCODE	592	chr7	-	144008683	144052796		ATAGAACACTAAAGTGTTACATGACAGATGTATGAGGGGAAGAGTGCTGGATTCAGAGCC	intronic antisense	NM_001001802	OR2A42	olfactory receptor 2A1/2A42	+	144015217	144016150	29.5032	23.2039	5.27941	3.9588	26.264	34.2144	28.0313	18.838	17.1946	33.5791	5.23816	5.15103	5.44904	3.61711	3.66198	4.5973
ASHGA5P019242	0.0163554	0.0526292	2.49772	up	noncoding	ENST00000475089	RP4-798C17.6	GENCODE	592	chr7	-	144008683	144052796		ATAGAACACTAAAGTGTTACATGACAGATGTATGAGGGGAAGAGTGCTGGATTCAGAGCC	intronic antisense	NM_001005287	OR2A1	olfactory receptor 2A1/2A42	+	144015217	144016150	29.5032	23.2039	5.27941	3.9588	26.264	34.2144	28.0313	18.838	17.1946	33.5791	5.23816	5.15103	5.44904	3.61711	3.66198	4.5973
ASHGA5P019242	0.0163554	0.0526292	2.49772	up	noncoding	ENST00000475089	RP4-798C17.6	GENCODE	592	chr7	-	144008683	144052796		ATAGAACACTAAAGTGTTACATGACAGATGTATGAGGGGAAGAGTGCTGGATTCAGAGCC	natural antisense	NM_005435	ARHGEF5	rho guanine nucleotide exchange factor 5	+	144052488	144077725	29.5032	23.2039	5.27941	3.9588	26.264	34.2144	28.0313	18.838	17.1946	33.5791	5.23816	5.15103	5.44904	3.61711	3.66198	4.5973
ASHGA5P032124	0.00831105	0.0344295	2.27999	up	noncoding	DB297878		LincRNAs identified by Khalil et al	535	chr10	+	78327153	78327688		TTTACTCAGACTTTCCTCAATCTTTAGATGTCCCCGGTTGCCTGGGGTAAGAAACTCTGT	intergenic							77.594	55.0696	6.54514	5.35612	76.9955	72.8529	82.9337	65.1068	50.9121	49.1899	6.64391	6.12246	6.86906	5.54095	5.35129	5.17612
ASHGA5P027456	0.00528398	0.0257964	4.66291	up	noncoding	ENST00000553165	RP1-78O14.1	GENCODE	448	chr12	-	79787451	79897142	ENST00000550268	AGGATGGAGTGGGGAAAAGAAGAGGGAGGCTGACAGAGAAGCTTAAAGAAATGCTTTCAG	intronic antisense	NM_001135805	SYT1	synaptotagmin-1	+	79257772	79845788	25.9941	8.32806	4.89937	2.67814	15.4967	47.7499	14.7357	8.29251	11.6917	5	4.53338	5.58288	4.58186	2.61837	3.07328	2.34278
ASHGA5P027456	0.00528398	0.0257964	4.66291	up	noncoding	ENST00000553165	RP1-78O14.1	GENCODE	448	chr12	-	79787451	79897142	ENST00000550268	AGGATGGAGTGGGGAAAAGAAGAGGGAGGCTGACAGAGAAGCTTAAAGAAATGCTTTCAG	intronic antisense	NM_001135806	SYT1	synaptotagmin-1	+	79439432	79845788	25.9941	8.32806	4.89937	2.67814	15.4967	47.7499	14.7357	8.29251	11.6917	5	4.53338	5.58288	4.58186	2.61837	3.07328	2.34278
ASHGA5P027456	0.00528398	0.0257964	4.66291	up	noncoding	ENST00000553165	RP1-78O14.1	GENCODE	448	chr12	-	79787451	79897142	ENST00000550268	AGGATGGAGTGGGGAAAAGAAGAGGGAGGCTGACAGAGAAGCTTAAAGAAATGCTTTCAG	intronic antisense	NM_005639	SYT1	synaptotagmin-1	+	79258448	79845788	25.9941	8.32806	4.89937	2.67814	15.4967	47.7499	14.7357	8.29251	11.6917	5	4.53338	5.58288	4.58186	2.61837	3.07328	2.34278
ASHGA5P023299	0.00779246	0.0330249	2.59295	up	noncoding	ENST00000577773	LINC00511	GENCODE	520	chr17	-	70417969	70419211		CTCTGTGGAGGAGATTAGTCCTGAGAGACTGACACCAGAGCCACCTGACGAATGTGGGTG	intergenic							18.9054	14.8551	4.66735	3.29275	14.2554	23.7583	18.7024	20.6538	10.9027	13.0088	4.42302	4.67562	4.9034	3.76426	2.97102	3.14298
ASHGA5P007972	0.000672394	0.00788691	5.55322	up	noncoding	ENST00000338711	FAM86FP	pseudogene	969	chr12	-	8385107	8395544	ENST00000427893, ENST00000459803, ENST00000478666, ENST00000484945, ENST00000489609, ENST00000491583, ENST00000497543, ENST00000528684, uc003dpr.4	ATATTTTGCAACTGTGAAGCATCCTGTGTGTGTGTGAAGCACCCGCCGTCAGTCAAGTAT								2820.96	587.1	11.3918	8.91847	2117.72	3777.41	2567.74	545.755	437.018	778.527	11.1173	11.5398	11.5183	8.7788	8.62759	9.34903
ASHGA5P026799	0.0062123	0.028592	2.06049	up	noncoding	ENST00000539685	AP000462.1	GENCODE	384	chr11	+	115267537	115268295	ENST00000540545, ENST00000543182	ATGTATCAAGATGTAGAATAGTACAGCTAAGCACAAGGCTCCTCCCCAGTCAAAGAGGAG	intronic antisense	NM_001098517	CADM1	cell adhesion molecule 1 isoform 2 precursor	-	115044344	115375241	736.391	422.823	9.50782	8.46483	775.446	725.013	708.716	446.234	420.664	401.57	9.69893	9.13312	9.6914	8.47908	8.56745	8.34795
ASHGA5P026799	0.0062123	0.028592	2.06049	up	noncoding	ENST00000539685	AP000462.1	GENCODE	384	chr11	+	115267537	115268295	ENST00000540545, ENST00000543182	ATGTATCAAGATGTAGAATAGTACAGCTAAGCACAAGGCTCCTCCCCAGTCAAAGAGGAG	intronic antisense	NM_014333	CADM1	cell adhesion molecule 1 isoform 1 precursor	-	115044344	115375241	736.391	422.823	9.50782	8.46483	775.446	725.013	708.716	446.234	420.664	401.57	9.69893	9.13312	9.6914	8.47908	8.56745	8.34795
ASHGA5P032478	0.00134876	0.0114777	2.76838	up	noncoding	ENST00000572349	RP11-63A1.1	GENCODE	395	chr17	-	44994135	45000400		AGAGCAAAGTTGAAGGCGAGCCGCTATCATCTGCTGTTCTCTGCCGCAGAGAGGACTGGA	bidirectional	NM_001012511	GOSR2	Golgi SNAP receptor complex member 2 isoform C	+	45000485	45014205	41.6542	25.8948	5.66216	4.19312	34.6102	61.4938	28.8587	23.862	23.0973	30.725	5.59363	5.90346	5.4894	3.9977	4.12612	4.45554
ASHGA5P032478	0.00134876	0.0114777	2.76838	up	noncoding	ENST00000572349	RP11-63A1.1	GENCODE	395	chr17	-	44994135	45000400		AGAGCAAAGTTGAAGGCGAGCCGCTATCATCTGCTGTTCTCTGCCGCAGAGAGGACTGGA	bidirectional	NM_004287	GOSR2	Golgi SNAP receptor complex member 2 isoform A	+	45000485	45018733	41.6542	25.8948	5.66216	4.19312	34.6102	61.4938	28.8587	23.862	23.0973	30.725	5.59363	5.90346	5.4894	3.9977	4.12612	4.45554
ASHGA5P032478	0.00134876	0.0114777	2.76838	up	noncoding	ENST00000572349	RP11-63A1.1	GENCODE	395	chr17	-	44994135	45000400		AGAGCAAAGTTGAAGGCGAGCCGCTATCATCTGCTGTTCTCTGCCGCAGAGAGGACTGGA	bidirectional	NM_054022	GOSR2	Golgi SNAP receptor complex member 2 isoform B	+	45000485	45018733	41.6542	25.8948	5.66216	4.19312	34.6102	61.4938	28.8587	23.862	23.0973	30.725	5.59363	5.90346	5.4894	3.9977	4.12612	4.45554
ASHGA5P051176	0.0266419	0.0726208	2.089	up	noncoding	ENST00000426585	TPTEP1	GENCODE	5725	chr22	+	17082933	17134699		GACCTTTCTGAAAACTGAAAAAATGAACACCAAATAAGTCAACCACAGATGTACTAACCC	intergenic							12.0739	11.3517	4.02551	2.9627	8.46514	17.9848	9.77166	11.0737	6.81447	16.1668	3.72938	4.30922	4.03792	2.83846	2.58548	3.46416
ASHGA5P014874	0.00211202	0.0148976	2.59584	up	noncoding	ENST00000414203	RP5-1170K4.7	GENCODE	464	chr22	+	37476107	37478887		TAGAAAGCAGAACTGTGAATCATGGATCCATCTCAGGGTCACCCTGCGGGTTCCTGTGAG	intronic antisense	NM_153609	TMPRSS6	transmembrane protease serine 6	-	37461478	37499693	20.7248	15.7521	4.80036	3.42416	24.4698	20.7521	16.9527	17.7019	14.7394	14.8151	5.14076	4.49355	4.76677	3.5139	3.42477	3.3338
ASHGA5P051209	3.05129e-05	0.00199963	5.37343	up	noncoding	ENST00000452055	TMEM191A	GENCODE	788	chr22	+	21057208	21058894		ATTGCCTCCCCGTCCCTGTCTCCCCTGACACTCGTTCCTCCAGAAGCCCGGTAAACCCCG	intergenic							106229	28600.2	17.0297	14.6039	107283	123226	88177.1	30139.7	25561.5	30099.5	17.0665	17.1321	16.8904	14.6597	14.4271	14.7248
ASHGA5P031581	0.0121574	0.0437231	2.18946	up	noncoding	ENST00000569345	CTA-363E6.7	GENCODE	510	chr16	+	19513010	19513608		CAAATTGGAAAGAGCAGTTTGGGGTCATGGGCTCAACAATATAAAGGCAGATTCAGTGAG	natural antisense	NM_016641	GDE1	glycerophosphodiester phosphodiesterase 1	-	19513014	19533450	311.144	185.95	8.34757	7.21699	354.864	297.682	280.885	194.438	201.682	161.728	8.65719	7.93897	8.44654	7.21157	7.47723	6.96218
ASHGA5P033303	5.48047e-06	0.0011092	19.3868	up	noncoding	ENST00000584131	RP11-927P21.1	GENCODE	280	chr17	+	62888918	62897399		ATCTTACAGATAGGAACTAAGGAATAATAACATAAGAAATAAAAAATGTGGAAATAAAAA	intronic antisense	NM_199340	LRRC37A3	leucine-rich repeat-containing protein 37A3 precursor	-	62850487	62914903	82.7846	5	6.62033	2.34333	85.9208	87.8848	74.5482	5	5	5	6.78108	6.35767	6.72224	2.34074	2.34646	2.34278
ASHGA5P032540	5.73136e-05	0.00267463	22.7417	up	noncoding	ENST00000507161	RP11-94C24.3	GENCODE	2525	chr17	-	48553179	48555752		GAAAATACCTTAAACCTATGTTCATTTCTTAAAAAGTCAAGAGGAGGCTGCTGCTGCCTT	bidirectional	NM_018346	RSAD1	radical S-adenosyl methionine domain-containing protein 1, mitochondrial precursor	+	48556189	48563336	370.95	24.2765	8.58731	4.08004	347.919	371.039	393.893	26.8731	18.4069	27.5494	8.62593	8.22825	8.90776	4.18062	3.77249	4.28702
ASHGA5P018034	0.00104368	0.00988842	4.60463	up	noncoding	ENST00000448600	RP11-445N18.4	GENCODE	442	chr10	-	45595702	45602526	uc001jbz.3	CAGATAGTAACTCAGCAATAGGGATAAAGACCTGATCTCACTGCTTAAGGAAATTGGGGA	intergenic							172.111	51.5513	7.44951	5.24642	110.72	286.663	118.951	57.5287	40.1088	57.0164	7.13786	7.88284	7.32782	5.35164	4.98721	5.40041
ASHGA5P032071	0.000478455	0.00670939	7.53199	up	noncoding	ENST00000576540	RP11-961A15.1	GENCODE	459	chr17	-	1629041	1641879		TTTATTGGTCCTATTTACATCTATTGCAAATTGTGAGAAGGCAGCAGGGGCCAACCCCTG	natural antisense	NM_001163673	WDR81	WD repeat-containing protein 81 isoform 3	+	1619816	1641893	260.196	49.8764	8.11058	5.19754	270.068	275.288	235.233	46.7535	62.5282	40.3475	8.29407	7.83066	8.20699	5.03796	5.67044	4.88424
ASHGA5P032071	0.000478455	0.00670939	7.53199	up	noncoding	ENST00000576540	RP11-961A15.1	GENCODE	459	chr17	-	1629041	1641879		TTTATTGGTCCTATTTACATCTATTGCAAATTGTGAGAAGGCAGCAGGGGCCAACCCCTG	natural antisense	NM_001163809	WDR81	WD repeat-containing protein 81 isoform 1	+	1628124	1641893	260.196	49.8764	8.11058	5.19754	270.068	275.288	235.233	46.7535	62.5282	40.3475	8.29407	7.83066	8.20699	5.03796	5.67044	4.88424
ASHGA5P032071	0.000478455	0.00670939	7.53199	up	noncoding	ENST00000576540	RP11-961A15.1	GENCODE	459	chr17	-	1629041	1641879		TTTATTGGTCCTATTTACATCTATTGCAAATTGTGAGAAGGCAGCAGGGGCCAACCCCTG	natural antisense	NM_001163811	WDR81	WD repeat-containing protein 81 isoform 4	+	1627833	1641893	260.196	49.8764	8.11058	5.19754	270.068	275.288	235.233	46.7535	62.5282	40.3475	8.29407	7.83066	8.20699	5.03796	5.67044	4.88424
ASHGA5P032071	0.000478455	0.00670939	7.53199	up	noncoding	ENST00000576540	RP11-961A15.1	GENCODE	459	chr17	-	1629041	1641879		TTTATTGGTCCTATTTACATCTATTGCAAATTGTGAGAAGGCAGCAGGGGCCAACCCCTG	natural antisense	NM_152348	WDR81	WD repeat-containing protein 81 isoform 2	+	1619816	1641893	260.196	49.8764	8.11058	5.19754	270.068	275.288	235.233	46.7535	62.5282	40.3475	8.29407	7.83066	8.20699	5.03796	5.67044	4.88424
ASHGA5P000519	1.79337e-05	0.00170548	7.53425	up	noncoding	chr8:140577700-140593825-	chr8:140577700-140593825	LincRNAs identified by Khalil et al	16125	chr8	-	140508518	140524643		GCATCTAACACTTGGGGAGTCCACTCAGATCCACTAACCAGGTTATTCTTACAACTGCTA	intergenic							32.4067	5.50759	5.3446	2.43114	26.2532	47.0694	23.8975	5.23513	5	6.28763	5.23757	5.56612	5.23011	2.4278	2.34646	2.51915
ASHGA5P017391	0.00311752	0.018567	2.34855	up	noncoding	ENST00000440931	AC018865.8	GENCODE	187	chr2	-	130748028	130785985		TGACTTCTATCTGTGGCTCACTGGAAGGAAACCCAGGTGGTTAGATAACGCTGTTATTGA	intergenic							358.784	193.39	8.49874	7.26697	308.524	490.678	277.151	217.845	206.833	155.493	8.46308	8.60279	8.43036	7.38241	7.51561	6.9029
ASHGA5P051089	5.52009e-05	0.00263227	13.1354	up	noncoding	ENST00000465390	AP000221.2	GENCODE	517	chr21	-	26825506	26839042		TGAAAAGGAGTAGGCTGCTAGACTGTGGGTCTCAAAATTCCAGATGAGGAGAGATTTACT	intergenic							21917.8	2058.37	14.4654	10.7501	22453.9	25205.1	18094.5	2559.64	2029.87	1585.61	14.5145	14.4929	14.3889	11.0395	10.8493	10.3613
ASHGA5P029206	0.00026869	0.00507343	2.60045	up	noncoding	ENST00000530196	ADAM21P1	GENCODE	2049	chr14	-	70712469	70714518	ENST00000256389, NM_003813	GTGCCTCACACCTTGTCCTCTTCTGCTCTGGACAGATGGCTCCATAACGACAGCTTCATA	intergenic							2169.74	959.35	11.0616	9.68285	2198.82	2368.93	1941.47	1066.56	897.101	914.388	11.1694	10.8653	11.1502	9.7748	9.69762	9.57614
ASHGA5P018862	0.0095443	0.037477	3.07744	up	noncoding	ENST00000458396	RP11-835E18.2	GENCODE	414	chr18	+	5232874	5238332		TCTTTCTCTGCTTGGCTCTCATGGTGCAGAAGTTTCCAAGAAGATGGCGCTGCTGGCCCG	intergenic							610.715	249.942	9.24939	7.62766	658.88	603.285	569.979	283.206	293.509	173.111	9.48051	8.87419	9.39348	7.77797	8.04029	7.06473
ASHGA5P041625	0.0134775	0.0465887	2.11961	up	noncoding	uc003mth.1	AX747750	UCSC_knowngene	2301	chr6	-	709104	711405		TAGGGTTTTTCACATGATACTGATTCTGCATTTGAAATGCAGAATCATAAGAAATGCTGC	intergenic							13.8206	13.3989	4.26744	3.18364	11.3774	14.7967	15.2876	11.9396	15.8891	12.3679	4.12119	4.05386	4.62726	2.94079	3.54045	3.06967
ASHGA5P038335	0.00820776	0.0341958	2.38897	up	noncoding	ENST00000461931	ST3GAL6-AS1	GENCODE	669	chr3	-	98434148	98451495		TATTAGACAAAATTTTGGATTCATTTTTTTCTCTTGAGTAAAACATGGGGAAAAAATCTT	natural antisense	ENST00000265261	ST3GAL6	ST3 beta-galactoside alpha-2,3-sialyltransferase 6 [Source:HGNC Symbol;Acc:18080]	+	98451293	98514689	314.717	173.491	8.36806	7.11167	341.113	294.621	308.416	173.67	187.271	159.533	8.59881	7.92176	8.58362	7.03225	7.36428	6.93848
ASHGA5P038335	0.00820776	0.0341958	2.38897	up	noncoding	ENST00000461931	ST3GAL6-AS1	GENCODE	669	chr3	-	98434148	98451495		TATTAGACAAAATTTTGGATTCATTTTTTTCTCTTGAGTAAAACATGGGGAAAAAATCTT	natural antisense	ENST00000460774	ST3GAL6	ST3 beta-galactoside alpha-2,3-sialyltransferase 6 [Source:HGNC Symbol;Acc:18080]	+	98451108	98503820	314.717	173.491	8.36806	7.11167	341.113	294.621	308.416	173.67	187.271	159.533	8.59881	7.92176	8.58362	7.03225	7.36428	6.93848
ASHGA5P038335	0.00820776	0.0341958	2.38897	up	noncoding	ENST00000461931	ST3GAL6-AS1	GENCODE	669	chr3	-	98434148	98451495		TATTAGACAAAATTTTGGATTCATTTTTTTCTCTTGAGTAAAACATGGGGAAAAAATCTT	natural antisense	ENST00000483910	ST3GAL6	ST3 beta-galactoside alpha-2,3-sialyltransferase 6 [Source:HGNC Symbol;Acc:18080]	+	98451098	98513206	314.717	173.491	8.36806	7.11167	341.113	294.621	308.416	173.67	187.271	159.533	8.59881	7.92176	8.58362	7.03225	7.36428	6.93848
ASHGA5P038335	0.00820776	0.0341958	2.38897	up	noncoding	ENST00000461931	ST3GAL6-AS1	GENCODE	669	chr3	-	98434148	98451495		TATTAGACAAAATTTTGGATTCATTTTTTTCTCTTGAGTAAAACATGGGGAAAAAATCTT	natural antisense	ENST00000497008	ST3GAL6	ST3 beta-galactoside alpha-2,3-sialyltransferase 6 [Source:HGNC Symbol;Acc:18080]	+	98451318	98507039	314.717	173.491	8.36806	7.11167	341.113	294.621	308.416	173.67	187.271	159.533	8.59881	7.92176	8.58362	7.03225	7.36428	6.93848
ASHGA5P038845	0.000521978	0.00699943	4.23762	up	noncoding	ENST00000464125	RP11-475O23.3	GENCODE	821	chr3	+	58592806	58620167		ACTAGAGAGAGAGAAGACAGAGAAATATAGGCAGTGAGTGAGGCTGTTCAGAACTCATGC	natural antisense	NM_138805	FAM3D	protein FAM3D precursor	-	58619669	58652561	44.765	18.2462	5.7317	3.64844	33.5425	69.9604	30.7919	21.2287	17.8292	15.6808	5.553	6.06414	5.57796	3.80877	3.71996	3.41661
ASHGA5P022191	0.000409418	0.00622632	13.1642	up	noncoding	ENST00000551898	RP11-493L12.2	GENCODE	359	chr12	-	47599683	47609983		CAGGGAAATGCAGGCTGAGGAATTACCAAGGAGGCAGGAGGTGGAGCAAAACACACCAAG	intronic antisense	ENST00000546455	PCED1B	PC-esterase domain containing 1B [Source:HGNC Symbol;Acc:28255]	+	47473385	47630443	96.9497	10.9311	6.62049	2.90195	60.6603	176.25	53.9385	10.0522	9.22648	13.5148	6.32844	7.23856	6.29448	2.73797	2.77089	3.19699
ASHGA5P016188	0.000405039	0.0061893	4.689	up	noncoding	ENST00000548271	AL589743.1	GENCODE	412	chr14	+	19653907	19683250	ENST00000427798, ENST00000548875	ATCCCTGCAGCTGTGTTTGAACAGGAAAGAAAAAAGAAGAAAACAAACCTCCATACGAGA	intergenic							412.431	116.71	8.72572	6.49644	387.56	468.418	381.315	132.993	124.124	93.0132	8.76935	8.54388	8.86392	6.6271	6.72454	6.13768
ASHGA5P037730	0.000395645	0.00612257	3.36998	up	noncoding	ENST00000437211	RRP7B	GENCODE	1778	chr22	-	42965134	42978015		TCCTGGGCACAAGGTGAACAGGCAAACTTGACCCTGTCTCTACTAAAAATATGAAAATTA	intronic antisense	NM_014509	SERHL2	serine hydrolase-like protein 2	+	42949924	42970388	5342.48	1803.92	12.3284	10.5756	5178.57	7178.11	3670.74	2009.34	1680.19	1722.23	12.3947	12.5494	12.041	10.6686	10.5795	10.4788
ASHGA5P046849	9.27008e-06	0.00132897	4.46989	up	noncoding	ENST00000453853	RP11-342C24.8	GENCODE	709	chr10	-	46798369	46809021	ENST00000430284, NR_046091	TAATTGGCTATCAAGCGAATTTTCCCAGATGAAAGCAATGTTGGGTTAGGGGACGACGGT	intergenic							502.981	143.397	8.97771	6.81747	469.522	604.928	434.495	141.568	130.314	158.308	9.02231	8.87804	9.03278	6.72734	6.80006	6.92502
ASHGA5P051735	0.00179647	0.0134912	7.42141	up	noncoding	ENST00000494885	RP11-550I24.2	GENCODE	517	chr3	+	157003948	157033934		TATAAGCAAAATAGAAGAAAAATAAGGTCGTTATTTCAAGAAAACGAAAGACAGTCAATG	intronic antisense	NM_001167911	VEPH1	ventricular zone-expressed PH domain-containing protein homolog 1 isoform 2	-	156977531	157221136	39.1995	8.75405	5.62935	2.73765	43.9066	28.7716	44.9201	7.74083	11.653	6.86829	5.91066	4.92356	6.05382	2.58489	3.06758	2.56049
ASHGA5P051735	0.00179647	0.0134912	7.42141	up	noncoding	ENST00000494885	RP11-550I24.2	GENCODE	517	chr3	+	157003948	157033934		TATAAGCAAAATAGAAGAAAAATAAGGTCGTTATTTCAAGAAAACGAAAGACAGTCAATG	intronic antisense	NM_001167912	VEPH1	ventricular zone-expressed PH domain-containing protein homolog 1 isoform 1	-	156977531	157221136	39.1995	8.75405	5.62935	2.73765	43.9066	28.7716	44.9201	7.74083	11.653	6.86829	5.91066	4.92356	6.05382	2.58489	3.06758	2.56049
ASHGA5P051735	0.00179647	0.0134912	7.42141	up	noncoding	ENST00000494885	RP11-550I24.2	GENCODE	517	chr3	+	157003948	157033934		TATAAGCAAAATAGAAGAAAAATAAGGTCGTTATTTCAAGAAAACGAAAGACAGTCAATG	intronic antisense	NM_024621	VEPH1	ventricular zone-expressed PH domain-containing protein homolog 1 isoform 1	-	156977531	157217445	39.1995	8.75405	5.62935	2.73765	43.9066	28.7716	44.9201	7.74083	11.653	6.86829	5.91066	4.92356	6.05382	2.58489	3.06758	2.56049
ASHGA5P054879	0.00496712	0.0248166	2.17711	up	noncoding	TCONS_00008588	XLOC_004093	LincRNAs identified by Cabili et al	248	chr4	-	139202777	139207245		ATTCCACTGGGAGAAAAGAGGATCTAAATGCCAGGCTCACCCCTCACATTCTATTCAACT	intergenic							835.239	449.738	9.6847	8.56229	909.704	820.913	775.1	440.721	441.079	467.413	9.92149	9.30367	9.82895	8.45765	8.6453	8.58392
ASHGA5P046836	0.0077615	0.0329358	2.33039	up	noncoding	uc004fwv.3	GOLGA2P2Y	UCSC_knowngene	1060	chrY	+	27601457	27606322	ENST00000335068, ENST00000398377, ENST00000400817, ENST00000539808, ENST00000558526, ENST00000559481, ENST00000559654, ENST00000559990, ENST00000560408, ENST00000560756, ENST00000560811, ENST00000561015, NR_001555, NR_026811, NR_033936, uc002bhh.4, uc002bkb.3, uc002bkc.3, uc002blo.2, uc010blu.2, uc010blv.3, uc010blw.2, uc010blx.2, uc010bmb.3, uc010bmc.3, uc010bmd.3, uc010bme.2, uc010bmf.3, uc010b…	AGTACATCAGCCAGGGGGCAGTGCCAAAGACGCAGCACTGGGAGAGGAGGACATCGTCAG	intergenic							15.3739	13.1256	4.35182	3.13124	12.1311	22.6056	11.385	12.3515	9.97815	17.0472	4.20814	4.6071	4.24021	2.98664	2.86063	3.54646
ASHGA5P056032	0.0122755	0.0440032	2.89364	up	noncoding	TCONS_00026279	XLOC_012626	LincRNAs identified by Cabili et al	1743	chr18	+	11489031	11490912		ATGATGTCACAAAGAGAAGTGAGAAATAATGCAAGCAGCTCCATTCCCCACGGCAACTGT	intergenic							474.944	211.525	8.91301	7.38012	530.715	442.611	451.506	242.777	242.129	149.669	9.19055	8.46623	9.08225	7.54078	7.74997	6.84962
ASHGA5P042301	0.00023149	0.00470965	2.79959	up	noncoding	ENST00000567732	CTA-14H9.5	GENCODE	342	chr6	+	26527290	26527632	NR_026790, NR_027451	GCTTGTGATTGTGAATGACTTTGTTGTTTGCTTCTTGTGATTTTCAGTTTCCTATAATGC	intergenic							84866.6	42801.2	16.6486	15.1634	82544.8	88534.3	83520.8	43629.2	48434.7	36339.6	16.5957	16.565	16.7851	15.184	15.3187	14.9874
ASHGA5P025637	2.55503e-05	0.00184601	6.27694	up	noncoding	NR_023351	SPRYD7	RefSeq	2936	chr13	-	50486841	50510625		GCTGGACACGCAGCACATGGGGTATTACTTATGACCATGTCGAATTAAATGTATACTTGA	exon sense-overlapping	NM_001127482	SPRYD7	SPRY domain-containing protein 7 isoform 2	-	50486841	50510625	3310.78	605.719	11.6554	9.00533	3282.42	3586.77	3063.16	682.492	570.733	563.931	11.7214	11.4649	11.7798	9.11656	9.02998	8.86944
ASHGA5P025637	2.55503e-05	0.00184601	6.27694	up	noncoding	NR_023351	SPRYD7	RefSeq	2936	chr13	-	50486841	50510625		GCTGGACACGCAGCACATGGGGTATTACTTATGACCATGTCGAATTAAATGTATACTTGA	exon sense-overlapping	NM_020456	SPRYD7	SPRY domain-containing protein 7 isoform 1	-	50486841	50510625	3310.78	605.719	11.6554	9.00533	3282.42	3586.77	3063.16	682.492	570.733	563.931	11.7214	11.4649	11.7798	9.11656	9.02998	8.86944
[truncated: 1,981 more rows]
