# Supplementary material for: Investigation of TGFβ1-Induced Long Noncoding RNAs in Endothelial Cells
Source: Int J Vasc Med. 2016 Apr 10;2016:2459687. doi: 10.1155/2016/2459687 (PMC4842052; doi:10.1155/2016/2459687)
Supplement: Supplementary file 1 — Quality Assessment of RNA Samples and Data Analysis. RNA integrity and genomic DNA contamination were evaluated by denaturing agarose gel electrophoresis. In all of the samples, the intensity of the upper 28S ribosomal RNA band was about twice that of the lower 18S band thereby confirming the integrity of the RNA studied. The absence of smears above the 28S band attests to the purity of the RNA samples. RNA quantity and purity were also assessed with the NanoDrop ND-1000. The combination of optical density (OD) A260/A280 ratios that were close to 2.0 and A260/A230 ratios that exceeded 1.8 further confirmed the purity of the RNA used. The Box Plot is a well accepted means to quickly visualize the distribution of a dataset. Our Box plots (10th, 90th percentile) showed comparable distributions of expression values after normalization. Hierarchical clustering is a widely used method for analysis of gene expression. Cluster analysis groups samples based on their expression levels with dendrograms summarize the arrangement of said clusters. The supplementary tables report the fold change, P value, false discovery rate, annotations, and raw and normalized intensities for differentially expressed and up-/down-regulated lncRNAs and mRNAs in TGFβ1-treated HUVECs relative to control HUVECs. [file 2459687.f1.zip › Supplement Table B-LncRNA_DOWN_TGFb1-treated_vs_Controlsample.xlsx]

## Sheet: Sheet1
# Fold Change cut-off: 2.0 # P-value cut-off: 0.05 # Condition pairs: TGFb1-treated_vs_Controlsample # Column A: ProbeName it represents probe name. # Column B: P-value, P-value calculated from unpaired t-test. # Column C: FDR, FDR is calculated from Benjamini Hochberg FDR. # Column D: FC (abs), the absolute ratio (no log scale) of normalized intensities between two conditions. # Column E: Regula…
TGFb1-treated_vs_Controlsample 2.0 fold down regulated LncRNAs
	P-value and FDR		Fold change and Regulation		Annotations																		Group--Raw Intensity		Group--Normalized Intensity		Raw Intensity						Normalized Intensity
ProbeName	P-value	FDR	FC (abs)	Regulation	type	seqname	GeneSymbol	source	RNAlength	chrom	strand	txStart	txEnd	Xhyb	Sequence	relationship	Associated_gene_acc	Associated_gene_name	Associated_protein_name	Associated_gene_strand	Associated_gene_start	Associated_gene_end	group-TGFb1-treated(raw)	group-Controlsample(raw)	group-TGFb1-treated(normalized)	group-Controlsample(normalized)	[10, TGFb1-treated](raw)	[11, TGFb1-treated](raw)	[12, TGFb1-treated](raw)	[1, Controlsample](raw)	[2, Controlsample](raw)	[3, Controlsample](raw)	[10, TGFb1-treated](normalized)	[11, TGFb1-treated](normalized)	[12, TGFb1-treated](normalized)	[1, Controlsample](normalized)	[2, Controlsample](normalized)	[3, Controlsample](normalized)
ASHGA5P028365	0.0467271	0.107205	2.18176	down	noncoding	ENST00000539391	RP11-522N14.2	GENCODE	2256	chr12	+	124690773	124693564		TTATCTTGATGCCAAAACAAGAACCAAGGACCCTTTTCCACTAGGAGAACTCTCGGCAAG	intron sense-overlapping	NM_001204299	ZNF664-FAM101A	protein FAM101A	+	124457761	124800570	9.82457	41.0146	3.78288	4.90837	8.14867	7.61824	13.7068	45.1244	33.8775	44.0418	3.67994	3.17393	4.49476	4.98668	4.72264	5.01579
ASHGA5P023891	0.00309836	0.0185019	2.49098	down	noncoding	HMlincRNA858-	HMlincRNA858	LincRNAs identified by Khalil et al	11020	chr2	-	159810159	159821179		TGCTCTACCAAAGTTAGTTTTTATTTAGTAGACAGTTAGATGTTTTCCTCTCCCTGTTAC	intergenic							191.808	584.078	7.63613	8.95284	120.297	285.551	169.575	574.92	541.46	635.854	7.24201	7.87778	7.78861	8.85542	8.95451	9.04861
ASHGA5P033259	0.0229248	0.0657657	2.82118	down	noncoding	NR_038410	BZRAP1-AS1	RefSeq	2500	chr17	+	56402810	56431088		TAACATCTTGTCTGCATCCCACAACAGGCAGATGGCCCTGTGCAGGGCTGAGCTGGAAGA	natural antisense	NM_001261835	BZRAP1	peripheral-type benzodiazepine receptor-associated protein 1 isoform c	-	56378587	56406152	8.02316	36.75	3.24665	4.74294	6.64079	12.4287	5	40.1531	38.9101	31.1869	3.41503	3.82897	2.49594	4.80674	4.93925	4.48284
ASHGA5P033259	0.0229248	0.0657657	2.82118	down	noncoding	NR_038410	BZRAP1-AS1	RefSeq	2500	chr17	+	56402810	56431088		TAACATCTTGTCTGCATCCCACAACAGGCAGATGGCCCTGTGCAGGGCTGAGCTGGAAGA	natural antisense	NM_003168	SUPT4H1	transcription elongation factor SPT4	-	56422538	56429563	8.02316	36.75	3.24665	4.74294	6.64079	12.4287	5	40.1531	38.9101	31.1869	3.41503	3.82897	2.49594	4.80674	4.93925	4.48284
ASHGA5P033259	0.0229248	0.0657657	2.82118	down	noncoding	NR_038410	BZRAP1-AS1	RefSeq	2500	chr17	+	56402810	56431088		TAACATCTTGTCTGCATCCCACAACAGGCAGATGGCCCTGTGCAGGGCTGAGCTGGAAGA	natural antisense	NM_004758	BZRAP1	peripheral-type benzodiazepine receptor-associated protein 1 isoform a	-	56378587	56406152	8.02316	36.75	3.24665	4.74294	6.64079	12.4287	5	40.1531	38.9101	31.1869	3.41503	3.82897	2.49594	4.80674	4.93925	4.48284
ASHGA5P033259	0.0229248	0.0657657	2.82118	down	noncoding	NR_038410	BZRAP1-AS1	RefSeq	2500	chr17	+	56402810	56431088		TAACATCTTGTCTGCATCCCACAACAGGCAGATGGCCCTGTGCAGGGCTGAGCTGGAAGA	natural antisense	NM_017763	RNF43	E3 ubiquitin-protein ligase RNF43 precursor	-	56431037	56494931	8.02316	36.75	3.24665	4.74294	6.64079	12.4287	5	40.1531	38.9101	31.1869	3.41503	3.82897	2.49594	4.80674	4.93925	4.48284
ASHGA5P033259	0.0229248	0.0657657	2.82118	down	noncoding	NR_038410	BZRAP1-AS1	RefSeq	2500	chr17	+	56402810	56431088		TAACATCTTGTCTGCATCCCACAACAGGCAGATGGCCCTGTGCAGGGCTGAGCTGGAAGA	natural antisense	NM_024418	BZRAP1	peripheral-type benzodiazepine receptor-associated protein 1 isoform b	-	56378587	56406152	8.02316	36.75	3.24665	4.74294	6.64079	12.4287	5	40.1531	38.9101	31.1869	3.41503	3.82897	2.49594	4.80674	4.93925	4.48284
ASHGA5P019779	0.0189591	0.0579605	4.09341	down	noncoding	ENST00000503067	RP11-325I22.2	GENCODE	654	chr5	-	1364228	1368510		CTGTAGCTGGACTTTATCTTCTATTCCGTTGGTCTGCCTATCTAGAAAGCAAAATTTCAA	intergenic							9.62075	60.9301	3.48592	5.51922	12.2573	11.6049	5	63.4285	66.9036	52.4581	4.22201	3.7398	2.49594	5.50069	5.77654	5.28043
ASHGA5P017994	0.0106501	0.040173	2.37263	down	noncoding	ENST00000448063	AP000470.2	GENCODE	693	chr21	-	25527483	25560655		GTACATGTTGTTTCTCCTAGATCGTGTTTCCTGAGAAGCAAATTTTGAGATGGTTTTGAG	intergenic							5.95169	25.7889	2.95021	4.1967	6.73845	6.11661	5	28.2569	24.6034	24.5066	3.43438	2.92032	2.49594	4.26162	4.22791	4.10057
ASHGA5P026319	0.00442541	0.0231614	4.47851	down	noncoding	ENST00000530102	RP11-64I17.1	GENCODE	460	chr11	+	38670313	38688407		CACAGAACTTTCATTTGATCTTATCTTTCGCTGTCACACACATCGACCTGCATTTTCTTT	intergenic							6.6393	43.0722	2.83009	4.99311	5	9.91789	5	38.7862	46.8999	43.5307	2.46913	3.52521	2.49594	4.75345	5.2278	4.99809
ASHGA5P036509	0.000449557	0.00650521	2.58351	down	noncoding	ENST00000568958	RP11-223I10.1	GENCODE	598	chr2	+	231916754	231917352		GTGTCACCCGGCTGCGTTTCGCATCTCTGCTCCCATGAATAAATGTATTTACTCTAAAAA	intergenic							295.177	907.342	8.2254	9.59473	220.221	420.227	245.083	893.211	807.128	1021.69	8.01333	8.3957	8.26717	9.52062	9.54149	9.72209
ASHGA5P026633	0.00894648	0.0360679	3.8427	down	noncoding	ENST00000535936	RP11-707G14.7	GENCODE	383	chr11	+	73639577	73641417		TTTTATTTATTTAACGGAGGAAGGTCATTTCTGGCTGGGGTAATAATGTTGTTGACAGAG	intergenic							5.99412	37.8703	2.85089	4.79301	7.98235	5	5	42.2362	36.5697	34.8052	3.65367	2.40305	2.49594	4.8812	4.8459	4.65193
ASHGA5P058745	0.00526127	0.025722	2.60704	down	noncoding	uc.316-	uc.316	UCR	240	chr10	-	126905564	126905804		TGACAGCTTTCTTCTAACCTAACAACTGGCATGCCTCATTTGCATATTAATGAGAAAACC	intergenic							5.08426	23.6579	2.67668	4.0591	5.25277	5	5	22.04	22.5021	26.4317	3.13106	2.40305	2.49594	3.87094	4.08495	4.22141
ASHGA5P033084	0.0290291	0.0769135	2.21143	down	noncoding	TCONS_00028182	XLOC_013541	LincRNAs identified by Cabili et al	1447	chr20	+	46421065	46428516		ACAGGTGACACTGGGTGACTCAGATCTTCTTGCCATAACATGGAGACACATGGTTAGAAA	intergenic							5.75785	24.0899	2.9456	4.09058	5	5.53486	6.73871	22.8515	25.9091	23.509	2.46913	2.80266	3.56501	3.92597	4.30774	4.03802
ASHGA5P057599	0.000798005	0.00865218	2.32855	down	noncoding	TCONS_00019525	XLOC_009320	LincRNAs identified by Cabili et al	750	chr11	+	125976782	125979103		TTCTGTCATTTTGTCTGCTAAATCTGGCAACTTAAATCCCAGGAAGGGGCCCATGGACTT	intergenic							5	18.4982	2.45604	3.67548	5	5	5	16.5701	19.1585	19.7661	2.46913	2.40305	2.49594	3.41622	3.83344	3.77677
ASHGA5P020695	0.00202137	0.0144971	2.40507	down	noncoding	ENST00000518631	RP11-586K2.1	GENCODE	576	chr8	+	89554845	89721920		ATGTCTCTGGAAAGGGTGAGCAGCTGACGTCCTTTGTTATTCATGTTAGGCTCCTGAAAA	intergenic							5.35035	21.2893	2.62419	3.89027	5	6.05106	5	19.8944	19.9136	24.06	2.46913	2.90748	2.49594	3.70452	3.89516	4.07111
ASHGA5P049587	0.000448373	0.00649762	2.05793	down	noncoding	TCONS_00013565	XLOC_006210	LincRNAs identified by Cabili et al	1001	chr7	+	112257751	112266279		ATAAGGGCTGCACATGTCATAATGGGATCTAAACAAATAGGAGGTGTACAGGGCTTGTGG	intergenic							5	16.5761	2.45604	3.49724	5	5	5	17.6128	13.8316	18.2839	2.46913	2.40305	2.49594	3.50578	3.32985	3.65608
ASHGA5P031762	0.00110178	0.0101775	2.32699	down	noncoding	ENST00000565327	RP11-327F22.5	GENCODE	352	chr16	+	50840578	50841540		ACCTGCCACTCTAGAAATCCAGAGAAGAGATTCCACTTGGATTAAGACTTGCATAAGTGG	intergenic							18.8276	77.9805	4.67957	5.89803	19.6585	20.8726	15.9517	88.4831	76.4199	69.0385	4.855	4.50168	4.68203	6.01663	5.98515	5.69231
ASHGA5P058764	0.0316186	0.081411	2.08681	down	noncoding	uc.236+	uc.236	UCR	267	chr8	+	37250468	37250735		GGGCTGCATTACATCAGTGTTTGATAGTTCATTTTTCCTTTCTTCATATTTTGCCCTGCT	intergenic							33.0082	110.273	5.34666	6.40795	38.1125	42.4781	18.4341	87.1387	123.528	120.152	5.72384	5.43278	4.88335	5.99349	6.71776	6.51261
ASHGA5P032500	0.00016176	0.00405306	2.34983	down	noncoding	TCONS_00029745	XLOC_014418	LincRNAs identified by Cabili et al	321	chr22	-	50981205	50983413		TGTCATCTGCCCCGTGAAATCAGCCTAACGCCGTTTCTCAATGACGTGGATCGCCCTAGG	intergenic							49.7591	181.01	5.93506	7.16762	47.5299	64.5581	37.1893	189.651	152.642	200.738	6.01311	5.96677	5.82531	7.17263	7.04474	7.28549
ASHGA5P046878	0.0274272	0.0742097	2.33959	down	noncoding	AK055207R		LincRNAs identified by Khalil et al	3191	chr18	-	29562860	29566050		CCTTCCTATGTGAGCCAGGGCCAAGTCCCAAAATTAGTGCCTGTTTTACTCTGAGAAAAT	intergenic							14.3725	56.0758	4.16857	5.39483	14.673	22.2252	6.21927	54.2817	55.9947	57.9512	4.46129	4.58238	3.46205	5.26616	5.49295	5.42538
ASHGA5P051906	0.00216853	0.0151069	2.48661	down	noncoding	ENST00000506425	RP11-412P11.1	GENCODE	957	chr4	+	23004775	23043141		CTAGACTTTTTTTTAGGGTGATTGGGTCATTGTTTTTTCTCCTGGAACCCTGAGTCCTCA	intergenic							29.5389	117.915	5.20113	6.5153	28.3968	42.4038	17.8162	122.563	105.821	125.359	5.33641	5.43076	4.83621	6.49341	6.47455	6.57795
ASHGA5P018569	0.0069524	0.0306837	2.83365	down	noncoding	ENST00000455116	AP001625.5	GENCODE	450	chr21	+	43928743	43929768		TGAAAGAAATCTTTTCTATGGACCTCTGGTTTTAGAGACAACATCTAGTTCTCTTACATC	intron sense-overlapping	NM_018964	SLC37A1	glycerol-3-phosphate transporter	+	43919741	44001550	6.25231	27.1221	2.77606	4.27872	5	8.75693	5	28.8231	24.7614	27.7818	2.46913	3.3631	2.49594	4.29566	4.23957	4.30093
ASHGA5P019901	0.0435383	0.102052	2.29991	down	noncoding	ENST00000504957	RP11-18H21.3	GENCODE	495	chr4	-	153128572	153147022		ATTTAATTATCCTGCACTGCTCAGATGTCAGTCTCTAAATTCCTAACACAAATGAACAGA	intergenic							7.57255	29.7466	3.21732	4.4189	9.4851	8.23256	5	27.502	29.2738	32.4641	3.8766	3.27942	2.49594	4.21814	4.49293	4.54562
ASHGA5P058137	3.63847e-06	0.000982542	3.92244	down	noncoding	TCONS_00026952	XLOC_013010	LincRNAs identified by Cabili et al	1692	chr19	+	22085705	22101719		GGCCTAGCAGGACTGCCTGCAGGGGATATGGTGACATTTTACTTTGCCCAGCACCAAGAT	intergenic							5	29.8235	2.45604	4.42779	5	5	5	29.4836	28.6511	31.336	2.46913	2.40305	2.49594	4.33413	4.45911	4.49014
ASHGA5P017527	0.000515869	0.00696476	2.63311	down	noncoding	ENST00000442749	CNTN4-AS1	GENCODE	1012	chr3	-	3081344	3102829		TAAATATAAGCATTTTCTTCTTTGTCTTCATGTCTCCAATATTTAACCTAAGAAGATAAA	natural antisense	NM_001206955	CNTN4	contactin-4 isoform a precursor	+	2280512	3099645	18.459	82.6998	4.59456	5.99132	14.2103	27.3006	13.8661	86.6974	78.9552	82.4467	4.41764	4.85885	4.50718	5.98623	6.03366	5.95408
ASHGA5P017527	0.000515869	0.00696476	2.63311	down	noncoding	ENST00000442749	CNTN4-AS1	GENCODE	1012	chr3	-	3081344	3102829		TAAATATAAGCATTTTCTTCTTTGTCTTCATGTCTCCAATATTTAACCTAAGAAGATAAA	natural antisense	NM_001206956	CNTN4	contactin-4 isoform d	+	2933898	3099645	18.459	82.6998	4.59456	5.99132	14.2103	27.3006	13.8661	86.6974	78.9552	82.4467	4.41764	4.85885	4.50718	5.98623	6.03366	5.95408
ASHGA5P017527	0.000515869	0.00696476	2.63311	down	noncoding	ENST00000442749	CNTN4-AS1	GENCODE	1012	chr3	-	3081344	3102829		TAAATATAAGCATTTTCTTCTTTGTCTTCATGTCTCCAATATTTAACCTAAGAAGATAAA	natural antisense	NM_175607	CNTN4	contactin-4 isoform a precursor	+	2140549	3099645	18.459	82.6998	4.59456	5.99132	14.2103	27.3006	13.8661	86.6974	78.9552	82.4467	4.41764	4.85885	4.50718	5.98623	6.03366	5.95408
ASHGA5P017527	0.000515869	0.00696476	2.63311	down	noncoding	ENST00000442749	CNTN4-AS1	GENCODE	1012	chr3	-	3081344	3102829		TAAATATAAGCATTTTCTTCTTTGTCTTCATGTCTCCAATATTTAACCTAAGAAGATAAA	natural antisense	NM_175613	CNTN4	contactin-4 isoform c	+	2933898	3099645	18.459	82.6998	4.59456	5.99132	14.2103	27.3006	13.8661	86.6974	78.9552	82.4467	4.41764	4.85885	4.50718	5.98623	6.03366	5.95408
ASHGA5P023508	0.0188871	0.057839	2.78225	down	noncoding	uc002jak.3	BC041872	UCSC_knowngene	2276	chr17	+	60783566	60815282		TCATCAACTCTTGTTCCATCAGGAAACTGCATCTTGGATTCTGGGTCAACATCATCCCCA	natural antisense	NM_001100875	MARCH10	probable E3 ubiquitin-protein ligase MARCH10	-	60778674	60884011	7.87092	35.4611	3.21961	4.69586	6.27985	12.3329	5	36.6051	34.2975	35.4807	3.34676	3.81612	2.49594	4.66273	4.74338	4.68146
ASHGA5P023508	0.0188871	0.057839	2.78225	down	noncoding	uc002jak.3	BC041872	UCSC_knowngene	2276	chr17	+	60783566	60815282		TCATCAACTCTTGTTCCATCAGGAAACTGCATCTTGGATTCTGGGTCAACATCATCCCCA	natural antisense	NM_152598	MARCH10	probable E3 ubiquitin-protein ligase MARCH10	-	60778674	60885705	7.87092	35.4611	3.21961	4.69586	6.27985	12.3329	5	36.6051	34.2975	35.4807	3.34676	3.81612	2.49594	4.66273	4.74338	4.68146
ASHGA5P018987	0.00504756	0.0251169	2.27042	down	noncoding	ENST00000463377	TCAM1P	GENCODE	453	chr17	+	61926651	61939892		ATCCTTTGCCCAGGCAAGCCACAGTTAGAGGAATCCAGTTGCCCTGGCAAACAGACCTGG	intergenic							5.24082	22.6514	2.81328	3.99624	5.58146	5.14101	5	24.8614	21.4795	21.6132	3.20344	2.74047	2.49594	4.06084	4.01342	3.91448
ASHGA5P048912	0.000759365	0.00844912	2.33355	down	noncoding	TCONS_00024508	XLOC_011826	LincRNAs identified by Cabili et al	1832	chr16	+	88218474	88220609		TGTGCAAGCCGCTCCGTGTTGGAAAATGTATGTAAAGTAAAATAAACACGGCTCTCGCTG	intergenic							5	18.5763	2.45604	3.67857	5	5	5	19.9547	19.8106	15.9636	2.46913	2.40305	2.49594	3.70849	3.88597	3.44125
ASHGA5P033669	0.00028677	0.00521481	2.07116	down	noncoding	ENST00000579775	RP11-357H3.1	GENCODE	211	chr18	-	73720072	73727816		GTGCAGCTGTATATGGGCCTGTTGGGGCTGATACAGCAGTCATTCTTTCCAAGAAATCTT	intergenic							5	16.6617	2.45604	3.50648	5	5	5	17.7556	14.0785	18.1511	2.46913	2.40305	2.49594	3.51896	3.35525	3.64523
ASHGA5P030892	0.00570624	0.0270792	3.27273	down	noncoding	ENST00000382313	CTD-2270P14.3	GENCODE	3523	chr16	-	2787091	2790805		AATGTCTAATCTGTATGTCATCGGAGTCAATAATGTGTTTTGCTATCGCTCTGGTTCCAG	intergenic							5.06131	29.7571	2.7033	4.4138	5	5	5.18394	26.9953	34.3355	27.9406	2.46913	2.40305	3.23772	4.18719	4.74529	4.30891
ASHGA5P040495	0.00443726	0.0232166	4.06529	down	noncoding	TCONS_00021869	XLOC_010468	LincRNAs identified by Cabili et al	741	chr13	+	90203038	90204606		CATGCATCCAGTACCATTTTCCTGCACATAAAGCGCTATCTATTCATTAAGATTTCTAGT	intergenic							6.45935	38.7805	2.80689	4.83024	5	9.37806	5	34.4219	38.3352	43.5844	2.46913	3.45559	2.49594	4.57346	4.91629	5.00098
ASHGA5P015448	0.0233402	0.06649	3.28277	down	noncoding	ENST00000420293	RP11-61I13.3	GENCODE	440	chr6	-	39856649	39865156		ATCAGGAAAATGCTTCTCCAGGATCATGATCAGGAGGTCAATGTCACTCTTCTCTGGGAT	natural antisense	NM_001201427	DAAM2	disheveled-associated activator of morphogenesis 2 isoform 1	+	39760158	39872653	7.5124	34.5677	2.93515	4.65006	5	12.5372	5	29.4313	35.8304	38.4415	2.46913	3.84038	2.49594	4.33	4.81346	4.80674
ASHGA5P015448	0.0233402	0.06649	3.28277	down	noncoding	ENST00000420293	RP11-61I13.3	GENCODE	440	chr6	-	39856649	39865156		ATCAGGAAAATGCTTCTCCAGGATCATGATCAGGAGGTCAATGTCACTCTTCTCTGGGAT	natural antisense	NM_015345	DAAM2	disheveled-associated activator of morphogenesis 2 isoform 2	+	39760772	39872653	7.5124	34.5677	2.93515	4.65006	5	12.5372	5	29.4313	35.8304	38.4415	2.46913	3.84038	2.49594	4.33	4.81346	4.80674
ASHGA5P057467	0.000169913	0.00410615	2.48976	down	noncoding	TCONS_00018133	XLOC_008408	LincRNAs identified by Cabili et al	337	chr10	+	20886073	20898900		CTTGGATAAGCTACCTAAGATCGGAACCCTCTGATAATTTGTGCTGCTATTTTAAGATCC	intergenic							5	19.7415	2.45604	3.77205	5	5	5	22.3255	16.3886	20.5106	2.46913	2.40305	2.49594	3.89068	3.58901	3.83645
ASHGA5P016482	0.000184104	0.00426694	2.11874	down	noncoding	ENST00000430842	RP1-20B11.2	GENCODE	851	chr6	+	524170	525581		CTGTATCTATATTCAAGTTTCCATCGAGTGTTTCTTTGGCTGCATCCCTCTGTGCCTTCT	intronic antisense	NM_018303	EXOC2	exocyst complex component 2	-	485137	693141	87.1518	265.07	6.67597	7.75917	80.3603	105.424	75.6715	257.423	257.947	279.842	6.69838	6.58399	6.74554	7.63151	7.85021	7.7958
ASHGA5P045216	0.000687012	0.00797184	2.95129	down	noncoding	ENST00000426946	RP11-220I1.2	GENCODE	944	chr9	-	37112914	37115487	ENST00000426358	GCTGCATTTCAAAATTGAACTTTAGCATGGAGTCTATGATGACTGGCTCATGTCTCTCCA	intergenic							5.22195	25.3697	2.59774	4.15908	5	5.66586	5	29.2331	20.3635	26.5126	2.46913	2.82814	2.49594	4.31905	3.93092	4.22729
ASHGA5P057837	0.000372444	0.0059392	2.1607	down	noncoding	TCONS_00022499	XLOC_010825	LincRNAs identified by Cabili et al	657	chr14	+	51411364	51413305		ATCCTTAGAGATTCTGAAGTTTGGACTTGAGCTTTTGGGGCAGAGACTGAATTGGGCCTT	natural antisense	ENST00000216392	PYGL	phosphorylase, glycogen, liver [Source:HGNC Symbol;Acc:9725]	-	51371938	51411454	5	17.2957	2.45604	3.56754	5	5	5	16.8547	15.5403	19.4922	2.46913	2.40305	2.49594	3.44003	3.50677	3.75582
ASHGA5P027665	0.00022096	0.00461951	2.59559	down	noncoding	CN264150		LincRNAs identified by Khalil et al	685	chrX	-	111874798	111959674		GAATCCCTCTTTCAGACTGCTGCAGATGCTTGTACTTAGAGTACTTAACCTGCATATAAG	exon sense-overlapping	ENST00000371968	LHFPL1	lipoma HMGIC fusion partner-like 1 [Source:HGNC Symbol;Acc:6587]	-	111873875	111923282	15.3353	71.6232	4.38887	5.76493	12.3923	20.0116	13.6019	80.442	68.5191	65.9085	4.23578	4.44714	4.48368	5.86709	5.81104	5.61667
ASHGA5P027665	0.00022096	0.00461951	2.59559	down	noncoding	CN264150		LincRNAs identified by Khalil et al	685	chrX	-	111874798	111959674		GAATCCCTCTTTCAGACTGCTGCAGATGCTTGTACTTAGAGTACTTAACCTGCATATAAG	exon sense-overlapping	ENST00000536453	LHFPL1	lipoma HMGIC fusion partner-like 1 [Source:HGNC Symbol;Acc:6587]	-	111873878	111923375	15.3353	71.6232	4.38887	5.76493	12.3923	20.0116	13.6019	80.442	68.5191	65.9085	4.23578	4.44714	4.48368	5.86709	5.81104	5.61667
ASHGA5P027665	0.00022096	0.00461951	2.59559	down	noncoding	CN264150		LincRNAs identified by Khalil et al	685	chrX	-	111874798	111959674		GAATCCCTCTTTCAGACTGCTGCAGATGCTTGTACTTAGAGTACTTAACCTGCATATAAG	exon sense-overlapping	NM_178175	LHFPL1	lipoma HMGIC fusion partner-like 1 protein precursor	-	111873878	111923375	15.3353	71.6232	4.38887	5.76493	12.3923	20.0116	13.6019	80.442	68.5191	65.9085	4.23578	4.44714	4.48368	5.86709	5.81104	5.61667
ASHGA5P000552	0.0375093	0.0917195	2.20492	down	noncoding	chr9:31332775-31343225+	chr9:31332775-31343225	LincRNAs identified by Khalil et al	10450	chr9	+	31342775	31353225		CAGGTCAGGCTTAAATCCTGGTTGTGTTGCATATTTATTTATTTTTGCCTTTGTAAGCTA	intergenic							7.69631	28.7649	3.22196	4.36269	7.21194	10.877	5	31.3434	24.4522	30.4992	3.51668	3.65327	2.49594	4.42716	4.21778	4.44312
ASHGA5P018063	9.00855e-05	0.00315892	2.59712	down	noncoding	ENST00000449007	RP11-359D14.3	GENCODE	110	chr4	-	77679706	77723117		TTTTCACGTTTCGGACCCTGAGAATATGTCCACCGCATTACAAATGGGATTCTCTGGCAT	intronic antisense	NM_020859	SHROOM3	protein Shroom3	+	77356252	77704405	5	20.4729	2.45604	3.83295	5	5	5	23.5244	19.2611	18.6331	2.46913	2.40305	2.49594	3.97039	3.84088	3.68759
ASHGA5P031220	0.00148541	0.0120833	2.57938	down	noncoding	ENST00000445290	RP1-127D3.4	GENCODE	407	chr1	-	171168385	171196927		AAGACTGCCCTTGATAGGGACTATACCAAGTTCTTCTTTGCAGCAAAACCTCAGGGTTTT	natural antisense	NM_001460	FMO2	dimethylaniline monooxygenase [N-oxide-forming] 2	+	171154387	171181822	5	20.6136	2.45604	3.82307	5	5	5	26.5486	17.8173	17.475	2.46913	2.40305	2.49594	4.16254	3.71934	3.58733
ASHGA5P050545	0.0030899	0.0184737	3.47447	down	noncoding	ENST00000443710	REG1P	GENCODE	562	chr2	-	79364013	79365495	ENST00000414597, NR_002714	TTTCCTATAGAGATTGCTGATTTGCTCCTTAAGCAAGAGATTCACTGCTGCTCAGCATGG	intergenic							5.20629	29.6724	2.59463	4.39142	5	5.61888	5	23.2455	36.5727	29.1989	2.46913	2.81881	2.49594	3.9525	4.84605	4.37571
ASHGA5P027492	4.66564e-05	0.00242218	2.48347	down	noncoding	ENST00000550287	RP11-887P2.5	GENCODE	1587	chr12	-	94101566	94131599		CTACCTACTAATATTTGCACTTTAAGCCACCTGAACCTCAGGAGAGTAATAAATTGCTAT	intronic antisense	NM_003805	CRADD	death domain-containing protein CRADD	+	94071150	94244531	5	19.6508	2.45604	3.7684	5	5	5	22.2731	17.2491	19.4302	2.46913	2.40305	2.49594	3.88681	3.66746	3.75092
ASHGA5P018148	0.000887196	0.00915267	2.46728	down	noncoding	ENST00000449958	RP11-117D22.2	GENCODE	850	chr1	-	53832339	53833917		CCACTTTAAAAGGTGTTGACTTTTCTAGTAAATATCCTCCATGTCAAAGTCTATCTCAAG	intergenic							5	19.5757	2.45604	3.75896	5	5	5	22.1664	20.3083	16.2525	2.46913	2.40305	2.49594	3.87897	3.92578	3.47213
ASHGA5P035608	0.00114009	0.0103756	2.06374	down	noncoding	ENST00000446741	AC105344.2	GENCODE	1100	chr2	-	231852356	231860747	ENST00000426904, ENST00000441063	TCTCTGATGGTTCTGGTTTCCTGGGCACCTAGAATAAGTGTGTCACCATTTGTCCTGAAG	bidirectional	NM_139073	SPATA3	spermatogenesis-associated protein 3	+	231860838	231871999	37.1807	124.803	5.56397	6.60923	39.2914	44.5447	27.706	130.055	126.163	118.191	5.76189	5.49529	5.43473	6.59021	6.74829	6.4892
ASHGA5P013205	0.00285196	0.0176292	2.76291	down	noncoding	NR_024091	ZFP91-CNTF	RefSeq	3544	chr11	+	58346586	58393205		AAGGGATGTCAAAGTCATACTGCAGTGGGACGGAACGGAGCATTCACCGCTGACCCCTCA	exon sense-overlapping	NM_000614	CNTF	ciliary neurotrophic factor	+	58390145	58393205	925.395	2786.13	9.74299	11.2092	643.246	1462.91	670.033	3058.66	2629.63	2670.11	9.44501	10.1732	9.61077	11.2914	11.1964	11.1397
ASHGA5P013205	0.00285196	0.0176292	2.76291	down	noncoding	NR_024091	ZFP91-CNTF	RefSeq	3544	chr11	+	58346586	58393205		AAGGGATGTCAAAGTCATACTGCAGTGGGACGGAACGGAGCATTCACCGCTGACCCCTCA	exon sense-overlapping	NM_001197051	ZFP91	E3 ubiquitin-protein ligase ZFP91 isoform 2	+	58346586	58389023	925.395	2786.13	9.74299	11.2092	643.246	1462.91	670.033	3058.66	2629.63	2670.11	9.44501	10.1732	9.61077	11.2914	11.1964	11.1397
ASHGA5P013205	0.00285196	0.0176292	2.76291	down	noncoding	NR_024091	ZFP91-CNTF	RefSeq	3544	chr11	+	58346586	58393205		AAGGGATGTCAAAGTCATACTGCAGTGGGACGGAACGGAGCATTCACCGCTGACCCCTCA	exon sense-overlapping	NM_053023	ZFP91	E3 ubiquitin-protein ligase ZFP91 isoform 1	+	58346586	58389023	925.395	2786.13	9.74299	11.2092	643.246	1462.91	670.033	3058.66	2629.63	2670.11	9.44501	10.1732	9.61077	11.2914	11.1964	11.1397
ASHGA5P037405	0.00658908	0.0296742	2.245	down	noncoding	uc021whv.1	Z49981	UCSC_knowngene	477	chr21	+	23539507	23539984		TTTGTCTCAGACCACTTCTAGCTACCCACATGGAAGCTAATATTCTTGGTCATTCAGCAG	intergenic							5.31668	22.5445	2.82052	3.98724	5.35009	5.59993	5	20.6914	24.0141	22.9281	3.15058	2.81503	2.49594	3.76806	4.19053	4.00313
ASHGA5P034887	0.0212349	0.0623808	3.06861	down	noncoding	ENST00000430897	AC099344.2	GENCODE	1061	chr2	-	11497640	11505762		TTCTGATGAATGGCTATCTGCTTATGTGCCTAGATCCACCAGAGTTGTCACAGTTACAGG	intergenic							7.8586	40.2321	3.25938	4.87697	10.0906	8.4852	5	47.911	37.4828	35.3026	3.96221	3.32	2.49594	5.07397	4.88246	4.67447
ASHGA5P025866	0.00206914	0.0147164	3.27207	down	noncoding	NR_045023	C17orf76-AS1	RefSeq	578	chr17	+	16342300	16373962		TATTGGAGCCAGGAGCCTGCCATGAGGCATGACTCCACAGTTTCTGCAACAACAGAGCCG	intronic antisense	NM_001113567	FAM211A	leucine-rich repeat-containing protein FAM211A isoform 1	-	16345318	16395505	1332.65	4989.25	10.3476	12.0578	977.706	1544.48	1475.76	5570.97	5119.02	4277.76	10.0361	10.2358	10.7708	12.1706	12.142	11.8608
ASHGA5P025866	0.00206914	0.0147164	3.27207	down	noncoding	NR_045023	C17orf76-AS1	RefSeq	578	chr17	+	16342300	16373962		TATTGGAGCCAGGAGCCTGCCATGAGGCATGACTCCACAGTTTCTGCAACAACAGAGCCG	intronic antisense	NM_207387	FAM211A	leucine-rich repeat-containing protein FAM211A isoform 2	-	16345318	16395505	1332.65	4989.25	10.3476	12.0578	977.706	1544.48	1475.76	5570.97	5119.02	4277.76	10.0361	10.2358	10.7708	12.1706	12.142	11.8608
ASHGA5P023138	0.0162188	0.0523455	2.46338	down	noncoding	ENST00000570859	RP11-204E4.3	GENCODE	352	chr16	+	20220246	20220847		TTTGTTGCAGTCCTAACCTCAGGACATCTTTGGAGATGGGGTCTGTCTTTAAGGCAGTAA	intergenic							5.2626	23.4803	2.74879	4.04944	5	5	5.78779	22.0471	23.1995	25.1943	2.46913	2.40305	3.3742	3.87144	4.13295	4.14392
ASHGA5P045079	3.66176e-05	0.00216561	4.19764	down	noncoding	TCONS_00000967	XLOC_000226	LincRNAs identified by Cabili et al	349	chr1	+	60880142	60881834		CCCTTGTCACTTAAGCTGAATATGTGAGAATTAAAGACATTCTTGCCTCTAGCCTAAGAT	intergenic							5	31.875	2.45604	4.52562	5	5	5	34.5757	32.6349	28.4146	2.46913	2.40305	2.49594	4.58025	4.66409	4.33253
ASHGA5P053536	0.0489895	0.110846	2.02307	down	noncoding	TCONS_00012628	XLOC_005544	LincRNAs identified by Cabili et al	807	chr6	+	168631120	168632020		CTCTGTGTGTTCCCACTGAGTTGGTCTTTGTTTATTTTCACACTTAAATTACACACTATA	intergenic							18.8753	64.3692	4.58224	5.59879	23.0925	24.0829	9.45055	64.9672	74.1803	53.9601	5.06332	4.69365	3.98974	5.53794	5.93937	5.31905
ASHGA5P031951	0.0349412	0.087404	2.26387	down	noncoding	TCONS_00029582	XLOC_014217	LincRNAs identified by Cabili et al	482	chr22	+	34587559	34614763		TGGAAAAGGGGAAAATGAATCATGCTACAGGCCAAGTGTCCATCACTGATTCCCAGAGAT	intergenic							6.3074	26.0013	3.01052	4.18931	8.06566	5.85654	5	32.4477	21.5554	24.0008	3.66808	2.86753	2.49594	4.48172	4.01845	4.06775
ASHGA5P052754	0.0155094	0.0508892	2.03128	down	noncoding	TCONS_00012251	XLOC_005807	LincRNAs identified by Cabili et al	764	chr6	-	112713578	112717623	TCONS_00012249, TCONS_00012250	AATACCATCGAGGTAAAGCTTTTTTCTCCTAGAGGAGCAACTGACTCACCGCAGCATGTT	intergenic							5	16.731	2.45604	3.47843	5	5	5	15.0873	12.5307	22.5751	2.46913	2.40305	2.49594	3.28388	3.17476	3.97665
ASHGA5P052916	0.0111615	0.0414746	2.13187	down	noncoding	NR_038849	LOC100505633	RefSeq	1154	chr1	+	159931013	159948876		GCACTAAATTAGCTTTGTATGTTATTAAATGTGTCTCGTCAATGCTGTTGGCATTGTTTC	intergenic							5	17.2034	2.45604	3.54816	5	5	5	13.2999	20.0592	18.251	2.46913	2.40305	2.49594	3.08417	3.9072	3.65312
ASHGA5P038025	0.000473006	0.00667565	2.38898	down	noncoding	TCONS_00024339	XLOC_011655	LincRNAs identified by Cabili et al	346	chr16	+	17107603	17119655		AATTCTGCTGTGTACGCAATCCATGTTTCTTTCCCCAGAGGATTCCAGATGGAGTGAACT	intergenic							33.3214	127.613	5.38773	6.64412	25.2025	47.7212	27.0405	133.336	122.351	127.153	5.17986	5.58231	5.401	6.63052	6.70156	6.60029
ASHGA5P051806	0.00699665	0.0307984	2.27277	down	noncoding	ENST00000444571	RP11-29A1.3	GENCODE	570	chr3	+	184880658	184898371		TGCTTGAGGGGTATGTGGATCTGTCTTTTGGTTGTGGGTACTTTAAGTGATGAGAAGTTT	intergenic							15.5761	64.787	4.42971	5.61416	18.6327	14.9121	13.1834	61.0953	68.1742	65.0914	4.78117	4.06284	4.44512	5.44268	5.80366	5.59615
ASHGA5P022270	0.00389577	0.0212884	2.73724	down	noncoding	ENST00000553679	RP11-26L16.1	GENCODE	207	chr14	+	86798719	86867629		TTACCATCTGTCTTTCCACAGAGACAACTCACAGGCTATAAAGTGCTTAACATTTCCTTG	intergenic							5.26061	23.7995	2.60549	4.05822	5	5.78183	5	21.897	28.9641	20.5374	2.46913	2.85141	2.49594	3.86052	4.47541	3.83872
ASHGA5P052117	0.0120423	0.0434767	2.05774	down	noncoding	ENST00000514881	RP11-597D13.7	pseudogene	919	chr4	+	159198909	159199828	NM_022831	CTGGGCCAATTGTAATAGAACTATACAAGAAACCCACTGACTTTAAAAGAAAGAAATTGC								3845	8629.9	11.8072	12.8483	3321.17	5629.06	2584.78	9966.41	9085.07	6838.2	11.7379	12.1572	11.5266	13.027	12.9686	12.5494
ASHGA5P014930	0.000235375	0.00474686	2.6871	down	noncoding	ENST00000414886	AC093901.1	GENCODE	778	chr2	-	118889703	118943962		CCTCTCTATGCTTGTGGCCTTGAACAACTGCCTTAACATTGCTGAAACTCAATATCTTCA	intergenic							12.002	58.7912	4.03688	5.46293	9.77318	17.133	9.09991	65.0251	54.6597	56.6888	3.91865	4.24798	3.94401	5.53911	5.45786	5.39182
ASHGA5P039641	0.00096162	0.00953582	2.13018	down	noncoding	ENST00000503593	RP11-203B7.1	GENCODE	522	chr4	-	146998997	147029309		AACTGGTCATCATTTCAAAAGCCCCATTTGGAAGCAAACCCTGGGATTATCAAGGAGAGA	intergenic							5.19859	18.5624	2.5931	3.68408	5	5.59578	5	20.3197	18.1181	17.2494	2.46913	2.81423	2.49594	3.73798	3.74744	3.56681
ASHGA5P014950	0.000841131	0.00889169	2.02047	down	noncoding	ENST00000422151	CES5AP1	GENCODE	357	chr22	-	23708488	23719083	ENST00000415114, ENST00000431237, NR_037839	ACCATCTTTGATTCTGTCTCCCATGGCCGAAGGCTTATTCCACAAAGCCGTCATGGAGAG	intergenic							79.2687	235.869	6.55488	7.56957	82.4329	90.4795	64.8937	262.12	200.433	245.055	6.73105	6.3922	6.5414	7.65748	7.46704	7.58419
ASHGA5P038318	0.00224992	0.0154606	4.43367	down	noncoding	ENST00000465795	RP11-354H21.1	GENCODE	409	chr3	-	78087855	78095945		CAGGTTAATCACGCTACCCTTGGTTATCATCACATGTATTTCTGAAATTGTCTTTTACAT	intergenic							6.16729	48.1134	3.00446	5.15296	5	8.07278	5.4291	54.3332	50.5703	39.4367	2.46913	3.24909	3.29517	5.26872	5.34217	4.84799
ASHGA5P042967	0.000430721	0.00640624	2.19644	down	noncoding	ENST00000446246	AC004593.3	GENCODE	798	chr7	-	29239155	29248586		GGACTAGTACTCCTCATCTGAGTAAATAATTTCTCTCACAGGGTTAATTTTAGCTTTGCA	intronic antisense	NM_004067	CHN2	beta-chimaerin isoform 2	+	29234120	29553944	5	17.4877	2.45604	3.59121	5	5	5	16.848	18.5474	17.0677	2.46913	2.40305	2.49594	3.43926	3.78593	3.54842
ASHGA5P044526	0.00128078	0.0112019	2.11322	down	noncoding	uc011liu.1	POU5F1P1	UCSC_knowngene	381	chr8	-	128428232	128428613	uc010sgj.1	GAGCTTTGATGTCCTGGGACTTCTCCGGGTTTTGCTCTAGCTTCTCCTTCTCCAGCTTCA	natural antisense	NM_001159542	POU5F1B	putative POU domain, class 5, transcription factor 1B	+	128427856	128429441	199.608	530.377	7.72658	8.80602	145.244	268.195	185.387	530.67	479.99	580.471	7.48901	7.78948	7.90124	8.74213	8.76611	8.90982
ASHGA5P038463	0.00121584	0.0108348	2.26515	down	noncoding	ENST00000492725	ATP1B3-AS1	GENCODE	376	chr3	-	141637093	141637863		CTGGGTTTTTCATTAACATTTCCCCCAACTATTCTAGAAGCAAAGGATACGTAATAGATA	intronic antisense	NM_001679	ATP1B3	sodium/potassium-transporting ATPase subunit beta-3	+	141595469	141645382	83.283	274.489	6.63162	7.81122	83.4661	89.1867	77.1962	273.512	273.576	276.378	6.74812	6.37497	6.77177	7.72227	7.93874	7.77266
ASHGA5P041201	0.013506	0.046648	2.02842	down	noncoding	ENST00000396880	ATG10-IT1	GENCODE	487	chr5	+	81287813	81288300		ATATTGTCCCTCATACCTTCAGGTTTTATGGTCACTCATACAATCACTTTGGCACCATCC	intron sense-overlapping	NM_001131028	ATG10	ubiquitin-like-conjugating enzyme ATG10	+	81267843	81551216	17.8594	63.9008	4.57025	5.5906	20.0115	22.0132	11.5535	56.0162	71.5695	64.1169	4.87797	4.56947	4.26331	5.314	5.88308	5.57473
ASHGA5P041201	0.013506	0.046648	2.02842	down	noncoding	ENST00000396880	ATG10-IT1	GENCODE	487	chr5	+	81287813	81288300		ATATTGTCCCTCATACCTTCAGGTTTTATGGTCACTCATACAATCACTTTGGCACCATCC	intron sense-overlapping	NM_031482	ATG10	ubiquitin-like-conjugating enzyme ATG10	+	81267843	81551216	17.8594	63.9008	4.57025	5.5906	20.0115	22.0132	11.5535	56.0162	71.5695	64.1169	4.87797	4.56947	4.26331	5.314	5.88308	5.57473
ASHGA5P041654	0.0411535	0.0982039	2.05847	down	noncoding	ENST00000444978	RP3-380B8.3	GENCODE	361	chr6	-	5875163	5876103		TGATATAATCCAGAAAAGCAAGAGTCCACCCAAAGTCAGAAGAGAAGAATTCAGAAGAGT	intergenic							7.42347	26.373	3.19333	4.2349	7.71755	9.55286	5	27.5683	24.6985	26.852	3.6063	3.47775	2.49594	4.22298	4.23611	4.24561
ASHGA5P037038	0.0234812	0.0667485	3.10788	down	noncoding	ENST00000414199	RP5-1066H13.4	GENCODE	471	chr1	+	41329585	41342342		TTTTTGCAAAGTGTAAAAAGCTACACCCTGGAATTTATTCTCCTGAATCTTTCTCTACAG	intergenic							9.09148	44.1363	3.3893	5.02523	8.11112	14.1633	5	47.5892	38.6121	46.2075	3.67537	3.99658	2.49594	5.06502	4.92661	5.08406
ASHGA5P016249	0.0111123	0.0413461	2.38628	down	noncoding	ENST00000428531	RP11-261N11.8	GENCODE	513	chr20	+	62000233	62002524		TGGTGGGTGGGACATGTCTACAAATAGCTCATCACGTCTCCAATCCAGAAGTGCTGTGTC	intergenic							5.52999	25.0737	2.86603	4.1208	5.6062	5.98378	5	26.8528	18.3202	30.0481	3.20837	2.89378	2.49594	4.1786	3.76496	4.41883
ASHGA5P048122	0.0250372	0.0696248	2.54535	down	noncoding	CD642394		LincRNAs identified by Khalil et al	752	chr3	-	163907665	163908407		GTGTTTCACCAATGCTCTTCAGTTATAACCTTATTACTTTCTGTCTAAGGAAAATGAAGG	intergenic							7.53753	32.4974	3.2099	4.55776	7.84053	9.77206	5	29.0683	35.5249	32.8988	3.62898	3.50476	2.49594	4.30863	4.79981	4.56485
ASHGA5P016449	0.0115672	0.0424216	2.64577	down	noncoding	ENST00000430518	AC018647.3	GENCODE	742	chr7	+	35756201	35759144		GATTCTTTCTATTCTTCCACCAGCCAAGGTGATGAGCACAAAAGGATCCATCTTATACAG	intergenic							6.00653	25.0727	2.73538	4.13906	5	8.01958	5	21.1555	28.8838	25.1787	2.46913	3.24106	2.49594	3.80346	4.47114	4.14259
ASHGA5P051869	0.00146365	0.0119557	4.51934	down	noncoding	NR_024569	LOC100130872	RefSeq	5001	chr4	-	1189570	1202750		TTTTCTGATATTTGTGCCATTTATTTGGTTTTTCTATTAAGTTTGCCAGAACCTCCGAGA	exon sense-overlapping	NM_001199021	SPON2	spondin-2 precursor	-	1160720	1202750	5.06545	39.9035	2.70412	4.88023	5	5	5.19635	40.9383	41.0943	37.6778	2.46913	2.40305	3.24017	4.83525	5.0288	4.77664
ASHGA5P023487	0.00153325	0.0122954	2.12082	down	noncoding	ENST00000581947	CTC-297N7.7	GENCODE	578	chr17	+	10515218	10526353	ENST00000585303	CGGATCATGAGATATTTTGTGCTGTTTTAGACTGCTCTTTCTTCCATTAAATGAGAGATT	intergenic							21.4218	80.3549	4.86038	5.945	19.2341	23.1477	21.8837	84.0506	73.2038	83.8104	4.82324	4.639	5.11891	5.93705	5.9187	5.97926
ASHGA5P034749	0.0171314	0.0542246	2.64665	down	noncoding	ENST00000424487	RP5-1113E3.3	GENCODE	467	chr1	+	10518611	10519395		TGATGACTCATCACCTTTTCCCTGCAAGGAGTGTACTGTAGATTACCAAACCTGCAGAAG	natural antisense	ENST00000377038	DFFA	DNA fragmentation factor, 45kDa, alpha polypeptide [Source:HGNC Symbol;Acc:2772]	-	10516578	10532583	239.732	822.671	7.9979	9.40207	225.114	255.043	239.038	889.497	1044.83	533.682	8.04549	7.72075	8.22745	9.51428	9.90096	8.79095
ASHGA5P030245	0.0145746	0.0489815	4.40174	down	noncoding	ENST00000561358	RP11-343B18.2	GENCODE	571	chr15	-	89340643	89341965		GGCTTCTCAACCTTTGTCACATTGGGCTTGATATTTTTAGTTTCTTTCAGTGGTAAATAT	intergenic							8.187	47.3816	3.00011	5.13819	5	14.561	5	48.0085	45.4221	48.7143	2.46913	4.03526	2.49594	5.07738	5.17703	5.16015
ASHGA5P028258	0.0483068	0.109843	2.00852	down	noncoding	TCONS_00010663	XLOC_004339	LincRNAs identified by Cabili et al	2412	chr5	+	36871456	36876605		TTCAATCCAGCCGACAGTCGTCTTCACCTCCAAAGGTTGCGTTCTTATTCGCAGAAATAA	intergenic							12.7205	46.3686	4.08621	5.09234	7.10235	15.2222	15.8371	51.184	37.0407	50.8813	3.49669	4.08952	4.67241	5.17922	4.8664	5.23139
ASHGA5P038741	0.000153839	0.00398469	3.04166	down	noncoding	TCONS_00023261	XLOC_011240	LincRNAs identified by Cabili et al	2484	chr15	+	48619764	48622979		AACATCTCTCCCAGACCTGGAAACACAGCCAGTAGCAAGGTCAGTATTAAGTTACCACAA	intergenic							214.793	792.42	7.80424	9.4091	159.484	311.549	173.345	804.937	737.045	835.277	7.60414	7.99152	7.81705	9.35918	9.41709	9.45101
ASHGA5P042154	8.22479e-05	0.00306778	3.12293	down	noncoding	ENST00000446887	RP1-111C20.3	GENCODE	331	chr6	-	159485759	159486305		ATCTCACTATCAGTTTAGGAAATTCTCTGGTCTTCATGCTGGCTTCTGACCCTTGTGTCG	intergenic							30.6223	158.762	5.3305	6.9734	29.3722	33.9047	28.5901	168.842	145.726	161.718	5.37807	5.13828	5.47517	6.99275	6.96547	6.96199
ASHGA5P054314	0.00107044	0.0100339	3.04927	down	noncoding	ENST00000428176	CHRM3-AS2	GENCODE	789	chr1	-	239869621	239870822		CTTACATAGATGTTAACCAAAGTCTGTAAGGTTCGTTCATTTGTCCACAGTTACCCAGAA	intronic antisense	NM_000740	CHRM3	muscarinic acetylcholine receptor M3	+	239792372	240072717	8.17242	48.3849	3.56374	5.1722	9.56434	9.1651	5.78782	51.2022	50.3809	43.5718	3.88923	3.42767	3.37432	5.17973	5.33658	5.0003
ASHGA5P049370	0.00547242	0.0263483	2.3725	down	noncoding	uc010cic.1	FLJ40448	UCSC_knowngene	2184	chr16	+	88809228	88812156		TGTGTCCACTCTGTTCAGTTTTTTGAGCACAAATGGTGTTAGGTGACAGACTCGGGATTG	intronic antisense	NM_001142864	PIEZO1	piezo-type mechanosensitive ion channel component 1	-	88781745	88851372	5.7918	21.9412	2.69896	3.94537	5	7.37541	5	24.295	21.449	20.0796	2.46913	3.13181	2.49594	4.02407	4.01102	3.80101
ASHGA5P036611	0.00515018	0.0254268	2.30512	down	noncoding	TCONS_00026423	XLOC_012769	LincRNAs identified by Cabili et al	970	chr18	-	11447607	11489912		AAGTCCATCACTCATCCAGAGAAGACTTTTTAGAGCCACTGTTCTTGGAGCCTGTTACCT	intergenic							21.3915	84.9476	4.81991	6.02476	15.1346	28.1359	20.904	95.1897	87.9538	71.6992	4.50216	4.89725	5.06034	6.12399	6.20213	5.74816
ASHGA5P032234	0.00825768	0.0342566	4.47421	down	noncoding	TCONS_00029538	XLOC_014188	LincRNAs identified by Cabili et al	2332	chr22	+	25957849	25960789		TGCTTAGCCTAAGACACGCAACTTTTTCCAGCTTTTACTCTTCGCTGAATTCTCACGGTG	intergenic							8.62985	61.1286	3.36539	5.52703	9.75937	11.1302	5	64.6395	61.1751	57.5712	3.91714	3.68309	2.49594	5.52991	5.6349	5.41627
ASHGA5P058898	0.000122609	0.00358719	2.74167	down	noncoding	uc.468-	uc.468	UCR	489	chrX	-	25017562	25018051		CCAACAACCTGATAATGCTGCCTTCGGGATGAAGGAATTTTAATCTGAAATTTGAGGCTG	intergenic							5	21.5741	2.45604	3.91109	5	5	5	21.6764	18.6027	24.4432	2.46913	2.40305	2.49594	3.84441	3.79104	4.09783
ASHGA5P056162	0.000500157	0.00685939	2.6998	down	noncoding	TCONS_00027578	XLOC_013095	LincRNAs identified by Cabili et al	1145	chr19	+	45240861	45249208		ACTTCCAGATGGAATTTCGTTTCCCTCTCAGGACTTTGAGCAGGTAAATTCCTGGCCTTT	intergenic							32.2726	140.033	5.34404	6.77689	25.7117	46.3144	24.7918	134.923	123.607	161.567	5.20871	5.54496	5.27845	6.65113	6.71878	6.96077
ASHGA5P044918	0.0169998	0.0539209	2.56713	down	noncoding	ENST00000522980	GS1-5L10.1	GENCODE	410	chr8	+	92988135	92989646		GATGTCATGACTACTTAATAATAGGATGGACTGGAAATATCTATGCATTCTCCTGTGTAT	natural antisense	NM_001198625	RUNX1T1	protein CBFA2T1 isoform A	-	92967194	93107882	7.37389	32.1538	3.18011	4.54027	7.31169	9.80998	5	34.2873	28.4389	33.7353	3.53484	3.50955	2.49594	4.56859	4.44731	4.60491
ASHGA5P044918	0.0169998	0.0539209	2.56713	down	noncoding	ENST00000522980	GS1-5L10.1	GENCODE	410	chr8	+	92988135	92989646		GATGTCATGACTACTTAATAATAGGATGGACTGGAAATATCTATGCATTCTCCTGTGTAT	natural antisense	NM_001198626	RUNX1T1	protein CBFA2T1 isoform B	-	92967194	93107882	7.37389	32.1538	3.18011	4.54027	7.31169	9.80998	5	34.2873	28.4389	33.7353	3.53484	3.50955	2.49594	4.56859	4.44731	4.60491
ASHGA5P044918	0.0169998	0.0539209	2.56713	down	noncoding	ENST00000522980	GS1-5L10.1	GENCODE	410	chr8	+	92988135	92989646		GATGTCATGACTACTTAATAATAGGATGGACTGGAAATATCTATGCATTCTCCTGTGTAT	natural antisense	NM_001198627	RUNX1T1	protein CBFA2T1 isoform B	-	92967194	93107882	7.37389	32.1538	3.18011	4.54027	7.31169	9.80998	5	34.2873	28.4389	33.7353	3.53484	3.50955	2.49594	4.56859	4.44731	4.60491
ASHGA5P044918	0.0169998	0.0539209	2.56713	down	noncoding	ENST00000522980	GS1-5L10.1	GENCODE	410	chr8	+	92988135	92989646		GATGTCATGACTACTTAATAATAGGATGGACTGGAAATATCTATGCATTCTCCTGTGTAT	natural antisense	NM_001198628	RUNX1T1	protein CBFA2T1 isoform B	-	92967194	93111916	7.37389	32.1538	3.18011	4.54027	7.31169	9.80998	5	34.2873	28.4389	33.7353	3.53484	3.50955	2.49594	4.56859	4.44731	4.60491
ASHGA5P044918	0.0169998	0.0539209	2.56713	down	noncoding	ENST00000522980	GS1-5L10.1	GENCODE	410	chr8	+	92988135	92989646		GATGTCATGACTACTTAATAATAGGATGGACTGGAAATATCTATGCATTCTCCTGTGTAT	natural antisense	NM_001198629	RUNX1T1	protein CBFA2T1 isoform B	-	92967194	93107490	7.37389	32.1538	3.18011	4.54027	7.31169	9.80998	5	34.2873	28.4389	33.7353	3.53484	3.50955	2.49594	4.56859	4.44731	4.60491
ASHGA5P044918	0.0169998	0.0539209	2.56713	down	noncoding	ENST00000522980	GS1-5L10.1	GENCODE	410	chr8	+	92988135	92989646		GATGTCATGACTACTTAATAATAGGATGGACTGGAAATATCTATGCATTCTCCTGTGTAT	natural antisense	NM_001198630	RUNX1T1	protein CBFA2T1 isoform B	-	92967194	93107490	7.37389	32.1538	3.18011	4.54027	7.31169	9.80998	5	34.2873	28.4389	33.7353	3.53484	3.50955	2.49594	4.56859	4.44731	4.60491
ASHGA5P044918	0.0169998	0.0539209	2.56713	down	noncoding	ENST00000522980	GS1-5L10.1	GENCODE	410	chr8	+	92988135	92989646		GATGTCATGACTACTTAATAATAGGATGGACTGGAAATATCTATGCATTCTCCTGTGTAT	natural antisense	NM_001198631	RUNX1T1	protein CBFA2T1 isoform B	-	92967194	93107882	7.37389	32.1538	3.18011	4.54027	7.31169	9.80998	5	34.2873	28.4389	33.7353	3.53484	3.50955	2.49594	4.56859	4.44731	4.60491
ASHGA5P044918	0.0169998	0.0539209	2.56713	down	noncoding	ENST00000522980	GS1-5L10.1	GENCODE	410	chr8	+	92988135	92989646		GATGTCATGACTACTTAATAATAGGATGGACTGGAAATATCTATGCATTCTCCTGTGTAT	natural antisense	NM_001198632	RUNX1T1	protein CBFA2T1 isoform A	-	92967194	93107490	7.37389	32.1538	3.18011	4.54027	7.31169	9.80998	5	34.2873	28.4389	33.7353	3.53484	3.50955	2.49594	4.56859	4.44731	4.60491
ASHGA5P044918	0.0169998	0.0539209	2.56713	down	noncoding	ENST00000522980	GS1-5L10.1	GENCODE	410	chr8	+	92988135	92989646		GATGTCATGACTACTTAATAATAGGATGGACTGGAAATATCTATGCATTCTCCTGTGTAT	natural antisense	NM_001198633	RUNX1T1	protein CBFA2T1 isoform D	-	92967194	93115454	7.37389	32.1538	3.18011	4.54027	7.31169	9.80998	5	34.2873	28.4389	33.7353	3.53484	3.50955	2.49594	4.56859	4.44731	4.60491
ASHGA5P044918	0.0169998	0.0539209	2.56713	down	noncoding	ENST00000522980	GS1-5L10.1	GENCODE	410	chr8	+	92988135	92989646		GATGTCATGACTACTTAATAATAGGATGGACTGGAAATATCTATGCATTCTCCTGTGTAT	natural antisense	NM_001198634	RUNX1T1	protein CBFA2T1 isoform E	-	92967194	93107882	7.37389	32.1538	3.18011	4.54027	7.31169	9.80998	5	34.2873	28.4389	33.7353	3.53484	3.50955	2.49594	4.56859	4.44731	4.60491
ASHGA5P044918	0.0169998	0.0539209	2.56713	down	noncoding	ENST00000522980	GS1-5L10.1	GENCODE	410	chr8	+	92988135	92989646		GATGTCATGACTACTTAATAATAGGATGGACTGGAAATATCTATGCATTCTCCTGTGTAT	natural antisense	NM_001198679	RUNX1T1	protein CBFA2T1 isoform F	-	92967194	93107882	7.37389	32.1538	3.18011	4.54027	7.31169	9.80998	5	34.2873	28.4389	33.7353	3.53484	3.50955	2.49594	4.56859	4.44731	4.60491
ASHGA5P044918	0.0169998	0.0539209	2.56713	down	noncoding	ENST00000522980	GS1-5L10.1	GENCODE	410	chr8	+	92988135	92989646		GATGTCATGACTACTTAATAATAGGATGGACTGGAAATATCTATGCATTCTCCTGTGTAT	natural antisense	NM_004349	RUNX1T1	protein CBFA2T1 isoform A	-	92967194	93075191	7.37389	32.1538	3.18011	4.54027	7.31169	9.80998	5	34.2873	28.4389	33.7353	3.53484	3.50955	2.49594	4.56859	4.44731	4.60491
ASHGA5P044918	0.0169998	0.0539209	2.56713	down	noncoding	ENST00000522980	GS1-5L10.1	GENCODE	410	chr8	+	92988135	92989646		GATGTCATGACTACTTAATAATAGGATGGACTGGAAATATCTATGCATTCTCCTGTGTAT	natural antisense	NM_175634	RUNX1T1	protein CBFA2T1 isoform B	-	92967194	93115454	7.37389	32.1538	3.18011	4.54027	7.31169	9.80998	5	34.2873	28.4389	33.7353	3.53484	3.50955	2.49594	4.56859	4.44731	4.60491
ASHGA5P044918	0.0169998	0.0539209	2.56713	down	noncoding	ENST00000522980	GS1-5L10.1	GENCODE	410	chr8	+	92988135	92989646		GATGTCATGACTACTTAATAATAGGATGGACTGGAAATATCTATGCATTCTCCTGTGTAT	natural antisense	NM_175635	RUNX1T1	protein CBFA2T1 isoform C	-	92967194	93107490	7.37389	32.1538	3.18011	4.54027	7.31169	9.80998	5	34.2873	28.4389	33.7353	3.53484	3.50955	2.49594	4.56859	4.44731	4.60491
ASHGA5P044918	0.0169998	0.0539209	2.56713	down	noncoding	ENST00000522980	GS1-5L10.1	GENCODE	410	chr8	+	92988135	92989646		GATGTCATGACTACTTAATAATAGGATGGACTGGAAATATCTATGCATTCTCCTGTGTAT	natural antisense	NM_175636	RUNX1T1	protein CBFA2T1 isoform C	-	92967194	93029908	7.37389	32.1538	3.18011	4.54027	7.31169	9.80998	5	34.2873	28.4389	33.7353	3.53484	3.50955	2.49594	4.56859	4.44731	4.60491
ASHGA5P037871	0.00204254	0.0145851	2.63258	down	noncoding	ENST00000420391	CTA-796E4.3	GENCODE	188	chr22	+	26557799	26560269		GCTCACTTTGTATTCTGTAAACTTTCAGTTGGAAAATAAACACACTGTCTCCCTGTCAAA	intergenic							109.161	373.228	6.88139	8.27787	72.2048	172.308	82.9713	370.088	331.743	417.852	6.56744	7.20722	6.86952	8.1966	8.23135	8.40566
ASHGA5P058200	0.00135372	0.0114914	5.0665	down	noncoding	TCONS_00028129	XLOC_013487	LincRNAs identified by Cabili et al	481	chr20	+	22753434	22754566		ATATTTACTGAACACGTACATGAAAAGCACAGTGACCACCTCTTTGGCCGGGAAGTGAGT	intergenic							6.31722	55.5316	3.03687	5.37786	5	8.05805	5.8936	54.2985	51.686	60.6102	2.46913	3.24566	3.39582	5.26714	5.3755	5.49094
ASHGA5P033779	0.000362239	0.00586507	2.20184	down	noncoding	ENST00000578583	RP11-13N13.6	GENCODE	447	chr18	+	19253588	19262522		GTATATTTTAATGGACTTGACTGTCTCTCCCACAACTAAAGTTTGAGCTCCTAAAGATTA	intronic antisense	NM_138340	ABHD3	abhydrolase domain-containing protein 3	-	19230857	19284766	217.242	589.448	7.82836	8.96707	166.391	304.263	181.072	581.834	561.709	624.8	7.65674	7.96149	7.86686	8.87343	9.00293	9.02486
ASHGA5P039908	0.0103437	0.0394401	2.37326	down	noncoding	TCONS_00023164	XLOC_011115	LincRNAs identified by Cabili et al	566	chr14	-	97472218	97474117		TTGTTCTCTGGAGTGTAAGTGACAACAGCTGTAGCTATCTGCTCAGTGTCTTTCCACATG	intergenic							6.11457	30.8001	3.22638	4.47325	5.98376	5.38885	6.9711	27.607	32.1792	32.6142	3.28643	2.78011	3.61258	4.22457	4.6426	4.55258
ASHGA5P033896	0.000399025	0.00614898	2.47924	down	noncoding	ENST00000562582	RP11-231E4.2	GENCODE	719	chr18	+	72076649	72077368		GTTTTTCCTGATTCGGACCTCACATGCTTTTTGACATGAAGACTTAAGTCTTTCTTAAAT	intergenic							9.44493	45.454	3.76896	5.07886	8.17461	10.7523	9.40784	45.1706	45.2071	45.9843	3.68577	3.63833	3.98279	4.9879	5.17004	5.07864
ASHGA5P053720	0.00211621	0.0149218	4.78245	down	noncoding	ENST00000535188	RP11-195E11.3	GENCODE	1811	chr9	-	72784558	72787804		ATCTTTCCAGAGATAGCTTCACACATAAGGAACCACCTTAGCATCCTTCACTCAATGCTG	natural antisense	NM_153267	MAMDC2	MAM domain-containing protein 2 precursor	+	72658496	72841888	8.5806	76.9387	3.62314	5.88089	7.47417	7.34093	10.9267	84.6132	76.7833	69.4195	3.56436	3.12459	4.18047	5.94959	5.99292	5.70016
ASHGA5P046941	0.0118147	0.0430089	2.76849	down	noncoding	ENST00000435317	RP11-464F9.9	GENCODE	508	chr10	-	75432879	75435692		AGCTTTTAAAAAGGAGCATCTCAGAATAAGATGGTGGTACAATTTGCTTATTGAGAAAGG	exon sense-overlapping	NM_001144000	AGAP5	arf-GAP with GTPase, ANK repeat and PH domain-containing protein 5	-	75434032	75457554	352.188	1145.86	8.44459	9.91369	422.213	430.604	203.749	1164.54	1385.51	887.523	8.88352	8.42807	8.02217	9.90058	10.3084	9.53206
ASHGA5P019664	0.000469643	0.00666846	5.07236	down	noncoding	ENST00000499180	RP11-453E17.1	GENCODE	409	chr4	+	68928779	68945944		ATAACTTAAGGAAAGCTTCCTGCTGACTCAAAAGGATTTTTCTTCTTCTGAACTCCTATT	intronic antisense	NM_207407	TMPRSS11F	transmembrane protease serine 11F	-	68918915	68995587	5.52968	43.4704	2.65502	4.99768	5	6.58904	5	51.1889	42.9552	36.2672	2.46913	3	2.49594	5.17956	5.09604	4.71744
ASHGA5P038519	0.00017135	0.00410615	2.03503	down	noncoding	ENST00000486545	RP11-439C8.2	GENCODE	521	chr3	-	154687071	154688012		CTGTTGATTGCGATTTCTGTTTGAAAATGGAATCTTGAGCATCTGTTCTCTCCTTTTATA	intergenic							29.4557	99.4611	5.23817	6.26322	24.8064	40.4405	23.1202	107.685	87.2189	103.479	5.15895	5.36783	5.18772	6.30231	6.18722	6.30013
ASHGA5P022180	0.000168453	0.00410257	2.3625	down	noncoding	ENST00000551438	RP11-588H23.3	GENCODE	596	chr12	+	70861974	70931985		CTTCTAGTCATTTAATTATTGCTTGACCAGAACTGTGCCTTGTAAGGAAGATAGTGAAAA	natural antisense	NM_001109754	PTPRB	receptor-type tyrosine-protein phosphatase beta isoform a	-	70910631	71031220	5	18.7247	2.45604	3.69636	5	5	5	17.9881	19.2024	18.9837	2.46913	2.40305	2.49594	3.53766	3.83668	3.71473
ASHGA5P022180	0.000168453	0.00410257	2.3625	down	noncoding	ENST00000551438	RP11-588H23.3	GENCODE	596	chr12	+	70861974	70931985		CTTCTAGTCATTTAATTATTGCTTGACCAGAACTGTGCCTTGTAAGGAAGATAGTGAAAA	natural antisense	NM_001206971	PTPRB	receptor-type tyrosine-protein phosphatase beta isoform c precursor	-	70910631	71003624	5	18.7247	2.45604	3.69636	5	5	5	17.9881	19.2024	18.9837	2.46913	2.40305	2.49594	3.53766	3.83668	3.71473
ASHGA5P022180	0.000168453	0.00410257	2.3625	down	noncoding	ENST00000551438	RP11-588H23.3	GENCODE	596	chr12	+	70861974	70931985		CTTCTAGTCATTTAATTATTGCTTGACCAGAACTGTGCCTTGTAAGGAAGATAGTGAAAA	natural antisense	NM_001206972	PTPRB	receptor-type tyrosine-protein phosphatase beta isoform d precursor	-	70910631	71003624	5	18.7247	2.45604	3.69636	5	5	5	17.9881	19.2024	18.9837	2.46913	2.40305	2.49594	3.53766	3.83668	3.71473
ASHGA5P022180	0.000168453	0.00410257	2.3625	down	noncoding	ENST00000551438	RP11-588H23.3	GENCODE	596	chr12	+	70861974	70931985		CTTCTAGTCATTTAATTATTGCTTGACCAGAACTGTGCCTTGTAAGGAAGATAGTGAAAA	natural antisense	NM_002837	PTPRB	receptor-type tyrosine-protein phosphatase beta isoform b precursor	-	70910631	71003624	5	18.7247	2.45604	3.69636	5	5	5	17.9881	19.2024	18.9837	2.46913	2.40305	2.49594	3.53766	3.83668	3.71473
ASHGA5P034854	0.00573671	0.0271649	2.75758	down	noncoding	ENST00000425763	AC107057.1	GENCODE	319	chr2	-	5689911	5696163		GAATGCATTTGGAGTAGGTGATGTTTAATGATCCTTTCTGTTCTCAATTCCTGTAATACA	intergenic							13.8974	65.2743	4.16179	5.6252	10.6464	22.6773	8.36854	61.4879	72.6064	61.7287	4.03471	4.61195	3.83872	5.45326	5.90488	5.51746
ASHGA5P028913	0.00408299	0.0219904	2.21854	down	noncoding	ENST00000417102	CLYBL-IT1	GENCODE	374	chr13	+	100426278	100427543		CCTGAGAATGTTTTCTGCCACTCAAATGAGTTGGAAATATAGTCTATTTCTGCTTTACAT	intron sense-overlapping	NM_206808	CLYBL	citrate lyase subunit beta-like protein, mitochondrial precursor	+	100258918	100549388	5	18.0164	2.45604	3.60566	5	5	5	18.4914	13.4087	22.1491	2.46913	2.40305	2.49594	3.58586	3.28295	3.94816
ASHGA5P038202	4.37621e-05	0.00237204	2.3136	down	noncoding	ENST00000457331	RP11-944L7.4	GENCODE	456	chr3	-	44598848	44727145		CTGGACTTGGATATAAGCTGTCACTTGTTACTTGGCCTTGCACTAAATGACCATTCTCAG	intronic antisense	NM_001024855	ZNF197	zinc finger protein 197 isoform 2	+	44666510	44689963	9.39771	42.2779	3.75972	4.96986	9.04491	11.3879	7.76036	43.4233	42.5206	40.8897	3.8163	3.71623	3.74662	4.92517	5.08076	4.90364
ASHGA5P038202	4.37621e-05	0.00237204	2.3136	down	noncoding	ENST00000457331	RP11-944L7.4	GENCODE	456	chr3	-	44598848	44727145		CTGGACTTGGATATAAGCTGTCACTTGTTACTTGGCCTTGCACTAAATGACCATTCTCAG	intronic antisense	NM_003420	ZNF35	zinc finger protein 35	+	44690232	44702283	9.39771	42.2779	3.75972	4.96986	9.04491	11.3879	7.76036	43.4233	42.5206	40.8897	3.8163	3.71623	3.74662	4.92517	5.08076	4.90364
ASHGA5P038202	4.37621e-05	0.00237204	2.3136	down	noncoding	ENST00000457331	RP11-944L7.4	GENCODE	456	chr3	-	44598848	44727145		CTGGACTTGGATATAAGCTGTCACTTGTTACTTGGCCTTGCACTAAATGACCATTCTCAG	intronic antisense	NM_006991	ZNF197	zinc finger protein 197 isoform 1	+	44666510	44686752	9.39771	42.2779	3.75972	4.96986	9.04491	11.3879	7.76036	43.4233	42.5206	40.8897	3.8163	3.71623	3.74662	4.92517	5.08076	4.90364
ASHGA5P038202	4.37621e-05	0.00237204	2.3136	down	noncoding	ENST00000457331	RP11-944L7.4	GENCODE	456	chr3	-	44598848	44727145		CTGGACTTGGATATAAGCTGTCACTTGTTACTTGGCCTTGCACTAAATGACCATTCTCAG	intronic antisense	NM_173658	ZNF660	zinc finger protein 660	+	44626455	44637557	9.39771	42.2779	3.75972	4.96986	9.04491	11.3879	7.76036	43.4233	42.5206	40.8897	3.8163	3.71623	3.74662	4.92517	5.08076	4.90364
ASHGA5P038202	4.37621e-05	0.00237204	2.3136	down	noncoding	ENST00000457331	RP11-944L7.4	GENCODE	456	chr3	-	44598848	44727145		CTGGACTTGGATATAAGCTGTCACTTGTTACTTGGCCTTGCACTAAATGACCATTCTCAG	natural antisense	NM_018651	ZNF167	zinc finger protein 167 isoform 1	+	44596712	44613650	9.39771	42.2779	3.75972	4.96986	9.04491	11.3879	7.76036	43.4233	42.5206	40.8897	3.8163	3.71623	3.74662	4.92517	5.08076	4.90364
ASHGA5P038202	4.37621e-05	0.00237204	2.3136	down	noncoding	ENST00000457331	RP11-944L7.4	GENCODE	456	chr3	-	44598848	44727145		CTGGACTTGGATATAAGCTGTCACTTGTTACTTGGCCTTGCACTAAATGACCATTCTCAG	natural antisense	NM_025169	ZNF167	zinc finger protein 167 isoform 2	+	44596712	44624973	9.39771	42.2779	3.75972	4.96986	9.04491	11.3879	7.76036	43.4233	42.5206	40.8897	3.8163	3.71623	3.74662	4.92517	5.08076	4.90364
ASHGA5P057765	0.00103924	0.00988842	2.82533	down	noncoding	TCONS_00021856	XLOC_010451	LincRNAs identified by Cabili et al	757	chr13	+	80585258	80733471		ATTAAAGAAGACATGGGAGTATTCCGTATACACTGGACTGGCATTCTAGCTCATCCTGGG	intergenic							5	22.1598	2.45604	3.95446	5	5	5	22.2998	25.4885	18.6911	2.46913	2.40305	2.49594	3.88858	4.28263	3.69217
ASHGA5P048385	0.000484533	0.00674373	3.64464	down	noncoding	CD172306		LincRNAs identified by Khalil et al	818	chr4	-	123055004	123055682		TAAAGAGAAAGAACTTTGCAAGTCTGCCTGAAGGGACTCACATCCATGCCTAAGGATGCT	intergenic							5	28.1047	2.45604	4.32182	5	5	5	30.0215	31.4488	22.8437	2.46913	2.40305	2.49594	4.36147	4.6074	3.99658
ASHGA5P016159	0.000530859	0.00704498	2.33085	down	noncoding	ENST00000427392	AC073342.12	GENCODE	592	chr7	-	142952356	142983756		AGAAGCGGCTTCTCCAGTCTCCCCAGTTCTTCAATCTCAAATAAATCATCTGTAGAGTCC	intronic antisense	NM_001143679	GSTK1	glutathione S-transferase kappa 1 isoform b	+	142960521	142966222	1238.43	3213.46	10.2176	11.4385	978.244	1724.74	1012.3	3198.24	2960.39	3481.76	10.0374	10.3872	10.2282	11.3629	11.3842	11.5682
ASHGA5P016159	0.000530859	0.00704498	2.33085	down	noncoding	ENST00000427392	AC073342.12	GENCODE	592	chr7	-	142952356	142983756		AGAAGCGGCTTCTCCAGTCTCCCCAGTTCTTCAATCTCAAATAAATCATCTGTAGAGTCC	intronic antisense	NM_001143680	GSTK1	glutathione S-transferase kappa 1 isoform c	+	142960521	142966222	1238.43	3213.46	10.2176	11.4385	978.244	1724.74	1012.3	3198.24	2960.39	3481.76	10.0374	10.3872	10.2282	11.3629	11.3842	11.5682
ASHGA5P016159	0.000530859	0.00704498	2.33085	down	noncoding	ENST00000427392	AC073342.12	GENCODE	592	chr7	-	142952356	142983756		AGAAGCGGCTTCTCCAGTCTCCCCAGTTCTTCAATCTCAAATAAATCATCTGTAGAGTCC	intronic antisense	NM_001143681	GSTK1	glutathione S-transferase kappa 1 isoform d	+	142960521	142966222	1238.43	3213.46	10.2176	11.4385	978.244	1724.74	1012.3	3198.24	2960.39	3481.76	10.0374	10.3872	10.2282	11.3629	11.3842	11.5682
ASHGA5P016159	0.000530859	0.00704498	2.33085	down	noncoding	ENST00000427392	AC073342.12	GENCODE	592	chr7	-	142952356	142983756		AGAAGCGGCTTCTCCAGTCTCCCCAGTTCTTCAATCTCAAATAAATCATCTGTAGAGTCC	intronic antisense	NM_015917	GSTK1	glutathione S-transferase kappa 1 isoform a	+	142960521	142966222	1238.43	3213.46	10.2176	11.4385	978.244	1724.74	1012.3	3198.24	2960.39	3481.76	10.0374	10.3872	10.2282	11.3629	11.3842	11.5682
ASHGA5P016159	0.000530859	0.00704498	2.33085	down	noncoding	ENST00000427392	AC073342.12	GENCODE	592	chr7	-	142952356	142983756		AGAAGCGGCTTCTCCAGTCTCCCCAGTTCTTCAATCTCAAATAAATCATCTGTAGAGTCC	natural antisense	NM_001242773	TMEM139	transmembrane protein 139 isoform a precursor	+	142982039	142985141	1238.43	3213.46	10.2176	11.4385	978.244	1724.74	1012.3	3198.24	2960.39	3481.76	10.0374	10.3872	10.2282	11.3629	11.3842	11.5682
ASHGA5P016159	0.000530859	0.00704498	2.33085	down	noncoding	ENST00000427392	AC073342.12	GENCODE	592	chr7	-	142952356	142983756		AGAAGCGGCTTCTCCAGTCTCCCCAGTTCTTCAATCTCAAATAAATCATCTGTAGAGTCC	natural antisense	NM_001242774	TMEM139	transmembrane protein 139 isoform a precursor	+	142982039	142985141	1238.43	3213.46	10.2176	11.4385	978.244	1724.74	1012.3	3198.24	2960.39	3481.76	10.0374	10.3872	10.2282	11.3629	11.3842	11.5682
ASHGA5P016159	0.000530859	0.00704498	2.33085	down	noncoding	ENST00000427392	AC073342.12	GENCODE	592	chr7	-	142952356	142983756		AGAAGCGGCTTCTCCAGTCTCCCCAGTTCTTCAATCTCAAATAAATCATCTGTAGAGTCC	natural antisense	NM_001242775	TMEM139	transmembrane protein 139 isoform a precursor	+	142982039	142985141	1238.43	3213.46	10.2176	11.4385	978.244	1724.74	1012.3	3198.24	2960.39	3481.76	10.0374	10.3872	10.2282	11.3629	11.3842	11.5682
ASHGA5P016159	0.000530859	0.00704498	2.33085	down	noncoding	ENST00000427392	AC073342.12	GENCODE	592	chr7	-	142952356	142983756		AGAAGCGGCTTCTCCAGTCTCCCCAGTTCTTCAATCTCAAATAAATCATCTGTAGAGTCC	natural antisense	NM_001242776	TMEM139	transmembrane protein 139 isoform b	+	142982039	142985141	1238.43	3213.46	10.2176	11.4385	978.244	1724.74	1012.3	3198.24	2960.39	3481.76	10.0374	10.3872	10.2282	11.3629	11.3842	11.5682
ASHGA5P016159	0.000530859	0.00704498	2.33085	down	noncoding	ENST00000427392	AC073342.12	GENCODE	592	chr7	-	142952356	142983756		AGAAGCGGCTTCTCCAGTCTCCCCAGTTCTTCAATCTCAAATAAATCATCTGTAGAGTCC	natural antisense	NM_001242777	TMEM139	transmembrane protein 139 isoform b	+	142982039	142985141	1238.43	3213.46	10.2176	11.4385	978.244	1724.74	1012.3	3198.24	2960.39	3481.76	10.0374	10.3872	10.2282	11.3629	11.3842	11.5682
ASHGA5P016159	0.000530859	0.00704498	2.33085	down	noncoding	ENST00000427392	AC073342.12	GENCODE	592	chr7	-	142952356	142983756		AGAAGCGGCTTCTCCAGTCTCCCCAGTTCTTCAATCTCAAATAAATCATCTGTAGAGTCC	natural antisense	NM_153345	TMEM139	transmembrane protein 139 isoform a precursor	+	142982039	142985141	1238.43	3213.46	10.2176	11.4385	978.244	1724.74	1012.3	3198.24	2960.39	3481.76	10.0374	10.3872	10.2282	11.3629	11.3842	11.5682
ASHGA5P058872	0.0192623	0.0584697	3.71625	down	noncoding	uc.394+	uc.394	UCR	202	chr15	+	97236099	97236301		TGGACACTAATACCCATTCATTTTCTTGGCTCCATAAATAAAAGCCGCCAGCTCTGTGGC	intergenic							8.88342	53.452	3.42773	5.32158	5	11.5551	10.0952	49.4956	54.4446	56.4157	2.46913	3.73346	4.08061	5.12687	5.45326	5.38461
ASHGA5P019668	0.0201948	0.060434	2.94858	down	noncoding	uc003yrb.3	CR933665	UCSC_knowngene	5641	chr8	-	125474737	125486804		CATCTTTGAGAGAAGCCAGTATTTGGAGATGTTTACCCTGCTGTTTTGGAAGTTGTCCAC	bidirectional	NM_007218	RNF139	E3 ubiquitin-protein ligase RNF139	+	125487007	125500859	13.2644	66.3049	4.08388	5.6439	16.7279	17.4382	5.62716	71.7695	72.0312	55.1141	4.6404	4.2706	3.34063	5.68579	5.89373	5.35217
ASHGA5P057245	0.0120506	0.0434767	2.20345	down	noncoding	TCONS_00014917	XLOC_006983	LincRNAs identified by Cabili et al	233	chr8	-	5858958	5860627	TCONS_00014916	TCTCCAGTTTTGACATCCTAGCCCCAGCAGATGATGCACCTAAAGTTGAAAAGCTGACTT	intergenic							27.3602	103.149	5.16543	6.30519	33.5614	26.9929	21.5264	121.538	103.512	84.3989	5.55406	4.84337	5.09885	6.4839	6.44244	5.98923
ASHGA5P040406	0.022086	0.0640876	2.35105	down	noncoding	ENST00000508986	EGFLAM-AS1	GENCODE	331	chr5	-	38425137	38427478		TACTATTTGCCTTTTTAAGGGAAAGAGTCCCAGAAGTTTTCAGCCCTCACCTGAGGACAC	natural antisense	NM_001205301	EGFLAM	pikachurin isoform 5 precursor	+	38258510	38465582	20.1555	76.2365	4.61913	5.85244	17.9599	32.8301	9.67656	69.8706	69.0812	89.7575	4.73503	5.0971	4.02527	5.64894	5.82286	6.08551
ASHGA5P040406	0.022086	0.0640876	2.35105	down	noncoding	ENST00000508986	EGFLAM-AS1	GENCODE	331	chr5	-	38425137	38427478		TACTATTTGCCTTTTTAAGGGAAAGAGTCCCAGAAGTTTTCAGCCCTCACCTGAGGACAC	natural antisense	NM_152403	EGFLAM	pikachurin isoform 1 precursor	+	38258510	38465582	20.1555	76.2365	4.61913	5.85244	17.9599	32.8301	9.67656	69.8706	69.0812	89.7575	4.73503	5.0971	4.02527	5.64894	5.82286	6.08551
ASHGA5P040406	0.022086	0.0640876	2.35105	down	noncoding	ENST00000508986	EGFLAM-AS1	GENCODE	331	chr5	-	38425137	38427478		TACTATTTGCCTTTTTAAGGGAAAGAGTCCCAGAAGTTTTCAGCCCTCACCTGAGGACAC	natural antisense	NM_182798	EGFLAM	pikachurin isoform 2	+	38403633	38465582	20.1555	76.2365	4.61913	5.85244	17.9599	32.8301	9.67656	69.8706	69.0812	89.7575	4.73503	5.0971	4.02527	5.64894	5.82286	6.08551
ASHGA5P015747	0.00260935	0.0168432	2.07489	down	noncoding	ENST00000423168	AC007392.3	GENCODE	555	chr2	+	66916999	66922713		GCTGGGACAAAAAAGAAATACATATTATTGCATTCTTACCCAAATACTCTTCGTGATTGC	intergenic							5	16.8306	2.45604	3.50908	5	5	5	17.6457	13.0619	19.7842	2.46913	2.40305	2.49594	3.5084	3.24064	3.7782
ASHGA5P022150	1.13416e-06	0.000772872	2.74291	down	noncoding	ENST00000550506	RP11-362A1.1	GENCODE	1372	chr12	+	82347497	82386912		CAATTTCAAAGTCTCCTCCAAGATATTCTTATGTAACTACTCTACTTGTCACCTGGACAT	intergenic							50.7601	212.963	5.9667	7.42241	44.6549	64.2881	43.3373	219.105	199.842	219.941	5.92961	5.96123	6.00927	7.39277	7.4596	7.41486
ASHGA5P047127	0.00583711	0.0274358	3.90168	down	noncoding	ENST00000451706	RP11-323P17.1	GENCODE	907	chr10	-	122522912	122551437		CAAATCGCAGAGGGAAGCTTCAAATACACTTCTAATCATCCTCAGTACCCAGCAGTATAT	intergenic							6.53656	37.5068	2.81665	4.78074	5	9.60967	5	34.8953	42.4253	35.1999	2.46913	3.48487	2.49594	4.59572	5.07752	4.669
ASHGA5P019129	0.0010447	0.00988842	2.35375	down	noncoding	ENST00000469595	AC007163.4	GENCODE	1471	chr2	+	201593648	201598832		GATATTTTAGTCGGTCTACAGAGAATCAACCCAAGAGTCCTCCGTCCAGTATAAGAAAAA	intergenic							15.131	62.8934	4.32852	5.56348	11.4133	22.3878	11.5919	66.2315	55.8282	66.6205	4.12465	4.59325	4.26766	5.56547	5.48857	5.63642
ASHGA5P037232	0.00228327	0.0156234	3.92749	down	noncoding	ENST00000419694	AP000221.1	GENCODE	1046	chr21	-	26887784	26890650		GTGAAGGCTTCTATTTGGTCAACTTGCTCTGTCTTTATAGCCAATTTATATTGATAAGAG	intergenic							6.13763	36.4343	2.75747	4.73108	5	8.4129	5	38.2898	31.2816	39.7313	2.46913	3.30735	2.49594	4.73428	4.60002	4.85895
ASHGA5P028583	2.06838e-06	0.000868385	4.34776	down	noncoding	uc001vhm.1	BC026300	UCSC_knowngene	633	chr13	-	54695074	54707001	ENST00000423442, ENST00000427299, ENST00000451744, uc001vhn.3	ACTATATTTAAATCTCAAAGGATGGACATCTCACAACCTTCCTACAGCAAGTACTGTGAG	intergenic							5	32.9463	2.45604	4.57632	5	5	5	36.5951	30.188	32.0557	2.46913	2.40305	2.49594	4.66258	4.54142	4.52495
ASHGA5P046697	0.00539782	0.0261899	3.54708	down	noncoding	ENST00000457775	XX-FW81066F1.2	GENCODE	578	chrX	+	149097879	149098916	ENST00000431993	AACCTCTATGGATTCTGCAAAACACGCCCAAGCAACTCTCCAGGAAACAAGAAAATGATG	natural antisense	ENST00000462691	CXorf40B	chromosome X open reading frame 40B [Source:HGNC Symbol;Acc:17402]	-	149097744	149106653	6.2253	33.4353	2.7716	4.59823	5	8.67591	5	28.4316	35.9348	35.9396	2.46913	3.34972	2.49594	4.27337	4.81807	4.70324
ASHGA5P018612	0.00289653	0.0178041	2.95199	down	noncoding	ENST00000455570	TTTY8B	GENCODE	518	chrY	-	6338813	6341671		CAGCAATAAGGTGCTTCACATCATGAAGGGATATTTTTCCATCATCTTGGGATTTCATTC	intergenic							5.15665	25.2932	2.5859	4.14759	5	5.46994	5	20.1095	28.1152	27.6547	2.46913	2.79264	2.49594	3.72096	4.42903	4.29278
ASHGA5P036280	0.00218579	0.0151841	3.46715	down	noncoding	ENST00000582847	RP11-88L24.1	GENCODE	1036	chr2	+	179597663	179607697		GTCTGCTGGCTGTAAAAATACTGGAGAAACTCATCTATAGCATGCAGAATACATATTCAG	natural antisense	NM_001256850	TTN	titin isoform 1	-	179390716	179672150	5	27.2538	2.45604	4.24979	5	5	5	33.9058	28.5073	19.3484	2.46913	2.40305	2.49594	4.55258	4.45286	3.74394
ASHGA5P036280	0.00218579	0.0151841	3.46715	down	noncoding	ENST00000582847	RP11-88L24.1	GENCODE	1036	chr2	+	179597663	179607697		GTCTGCTGGCTGTAAAAATACTGGAGAAACTCATCTATAGCATGCAGAATACATATTCAG	natural antisense	NM_001267550	TTN	titin isoform IC	-	179390716	179672150	5	27.2538	2.45604	4.24979	5	5	5	33.9058	28.5073	19.3484	2.46913	2.40305	2.49594	4.55258	4.45286	3.74394
ASHGA5P036280	0.00218579	0.0151841	3.46715	down	noncoding	ENST00000582847	RP11-88L24.1	GENCODE	1036	chr2	+	179597663	179607697		GTCTGCTGGCTGTAAAAATACTGGAGAAACTCATCTATAGCATGCAGAATACATATTCAG	natural antisense	NM_003319	TTN	titin isoform N2-B	-	179390717	179672150	5	27.2538	2.45604	4.24979	5	5	5	33.9058	28.5073	19.3484	2.46913	2.40305	2.49594	4.55258	4.45286	3.74394
ASHGA5P036280	0.00218579	0.0151841	3.46715	down	noncoding	ENST00000582847	RP11-88L24.1	GENCODE	1036	chr2	+	179597663	179607697		GTCTGCTGGCTGTAAAAATACTGGAGAAACTCATCTATAGCATGCAGAATACATATTCAG	natural antisense	NM_133378	TTN	titin isoform N2-A	-	179390717	179672150	5	27.2538	2.45604	4.24979	5	5	5	33.9058	28.5073	19.3484	2.46913	2.40305	2.49594	4.55258	4.45286	3.74394
ASHGA5P036280	0.00218579	0.0151841	3.46715	down	noncoding	ENST00000582847	RP11-88L24.1	GENCODE	1036	chr2	+	179597663	179607697		GTCTGCTGGCTGTAAAAATACTGGAGAAACTCATCTATAGCATGCAGAATACATATTCAG	natural antisense	NM_133432	TTN	titin isoform novex-1	-	179390717	179672150	5	27.2538	2.45604	4.24979	5	5	5	33.9058	28.5073	19.3484	2.46913	2.40305	2.49594	4.55258	4.45286	3.74394
ASHGA5P036280	0.00218579	0.0151841	3.46715	down	noncoding	ENST00000582847	RP11-88L24.1	GENCODE	1036	chr2	+	179597663	179607697		GTCTGCTGGCTGTAAAAATACTGGAGAAACTCATCTATAGCATGCAGAATACATATTCAG	natural antisense	NM_133437	TTN	titin isoform novex-2	-	179390717	179672150	5	27.2538	2.45604	4.24979	5	5	5	33.9058	28.5073	19.3484	2.46913	2.40305	2.49594	4.55258	4.45286	3.74394
ASHGA5P027727	1.90992e-07	0.000437461	4.42642	down	noncoding	CV358521R		LincRNAs identified by Khalil et al	524	chrX	-	16578295	16578798		CGCGCTGAACTACCAAGGATAGACTGTGGGATATATTTATTGTTTTGTTTTTCCAGAGCA	intergenic							5	33.3551	2.45604	4.60218	5	5	5	34.9148	31.6478	33.5029	2.46913	2.40305	2.49594	4.59632	4.61758	4.59264
ASHGA5P042021	0.0440356	0.102839	2.65963	down	noncoding	ENST00000429007	RP1-293L8.5	GENCODE	501	chr6	-	126119001	126140004		GCCATGAAGTCAGTATTATTTTCATGTCTTGGCCATCTTAAGTTCCTGTTTTGTGAATAT	intronic antisense	NM_001122842	NCOA7	nuclear receptor coactivator 7 isoform 2	+	126111908	126253176	8.74136	38.5187	3.40681	4.81803	5	11.7047	9.51935	42.3203	39.4323	33.8035	2.46913	3.75003	4.00127	4.8839	4.9613	4.6089
ASHGA5P042021	0.0440356	0.102839	2.65963	down	noncoding	ENST00000429007	RP1-293L8.5	GENCODE	501	chr6	-	126119001	126140004		GCCATGAAGTCAGTATTATTTTCATGTCTTGGCCATCTTAAGTTCCTGTTTTGTGAATAT	intronic antisense	NM_001199619	NCOA7	nuclear receptor coactivator 7 isoform 1	+	126102306	126253176	8.74136	38.5187	3.40681	4.81803	5	11.7047	9.51935	42.3203	39.4323	33.8035	2.46913	3.75003	4.00127	4.8839	4.9613	4.6089
ASHGA5P042021	0.0440356	0.102839	2.65963	down	noncoding	ENST00000429007	RP1-293L8.5	GENCODE	501	chr6	-	126119001	126140004		GCCATGAAGTCAGTATTATTTTCATGTCTTGGCCATCTTAAGTTCCTGTTTTGTGAATAT	intronic antisense	NM_001199620	NCOA7	nuclear receptor coactivator 7 isoform 1	+	126102306	126253176	8.74136	38.5187	3.40681	4.81803	5	11.7047	9.51935	42.3203	39.4323	33.8035	2.46913	3.75003	4.00127	4.8839	4.9613	4.6089
ASHGA5P042021	0.0440356	0.102839	2.65963	down	noncoding	ENST00000429007	RP1-293L8.5	GENCODE	501	chr6	-	126119001	126140004		GCCATGAAGTCAGTATTATTTTCATGTCTTGGCCATCTTAAGTTCCTGTTTTGTGAATAT	intronic antisense	NM_001199621	NCOA7	nuclear receptor coactivator 7 isoform 3	+	126111908	126253176	8.74136	38.5187	3.40681	4.81803	5	11.7047	9.51935	42.3203	39.4323	33.8035	2.46913	3.75003	4.00127	4.8839	4.9613	4.6089
ASHGA5P042021	0.0440356	0.102839	2.65963	down	noncoding	ENST00000429007	RP1-293L8.5	GENCODE	501	chr6	-	126119001	126140004		GCCATGAAGTCAGTATTATTTTCATGTCTTGGCCATCTTAAGTTCCTGTTTTGTGAATAT	intronic antisense	NM_181782	NCOA7	nuclear receptor coactivator 7 isoform 1	+	126111908	126253176	8.74136	38.5187	3.40681	4.81803	5	11.7047	9.51935	42.3203	39.4323	33.8035	2.46913	3.75003	4.00127	4.8839	4.9613	4.6089
ASHGA5P047514	0.00176731	0.0133508	2.56802	down	noncoding	TCONS_00013523	XLOC_006163	LincRNAs identified by Cabili et al	466	chr7	+	89123840	89126206	TCONS_00013521, TCONS_00014171	GCCATTCTTTTCCTGCAAAGATCCTAACTGAATGAGATAACTACTTCATAAGCTATTTGT	intergenic							5.4098	22.804	2.63461	3.99527	5	6.2294	5	27.1885	19.7976	21.4259	2.46913	2.93875	2.49594	4.20004	3.88436	3.9014
ASHGA5P048383	0.00316469	0.0187388	2.1025	down	noncoding	ENST00000545958	RP11-856F16.2	GENCODE	593	chr11	-	94607216	94658686		AGTGAAACTCTAGCTTCAGAGACCTGACTCCAACTTCTCCAGTTCCATATAATATCCTGG	natural antisense	NM_130847	AMOTL1	angiomotin-like protein 1	+	94501507	94609918	32.0577	109.721	5.34305	6.41515	22.8981	44.5331	28.7419	112.971	113.193	103	5.05207	5.49434	5.48273	6.37135	6.58107	6.29304
ASHGA5P014163	6.33316e-08	0.000410062	2.17715	down	noncoding	ENST00000400418	CES5AP1	pseudogene	859	chr22	-	23701789	23719201		TTCCAGCCTTATTCTGTCTCCCATGGCCGAAGGCTTATTCCACAAAGCCGTCATGGAGAG								93.9228	286.641	6.75502	7.87746	84.178	122.403	75.1878	303.44	261.992	294.492	6.75858	6.77006	6.73643	7.88856	7.86998	7.87385
ASHGA5P039900	0.0105992	0.0400732	3.07787	down	noncoding	ENST00000515422	RP11-395I6.2	GENCODE	553	chr4	+	40267091	40268077		AGCTCTTTACTTTCTCCATCGAGGCATCCACCAAACTCTACAAAATCTAGTTAATTGCTC	intergenic							10.5358	56.7683	3.79237	5.4143	5.03645	16.0833	10.4876	55.9587	55.7702	58.576	3.08381	4.16565	4.12765	5.31328	5.48677	5.44285
ASHGA5P039524	0.00160382	0.0126646	2.34221	down	noncoding	TCONS_00022439	XLOC_010775	LincRNAs identified by Cabili et al	278	chr14	+	25719559	25721093		AGCTGATGTGCCCAAGAACTGAGCCCAAGTCTTAGCACAAGATCTCCATCCATCAAATAA	intergenic							32.5212	123.624	5.36085	6.58872	23.7472	45.7225	28.094	115.916	116.362	138.594	5.10211	5.52882	5.45162	6.41111	6.62429	6.73076
ASHGA5P025672	0.000463874	0.00662338	2.8136	down	noncoding	NR_024507	LINC00598	RefSeq	3972	chr13	-	40921270	41055143		AATGAAAAGTCCAATCGAAGATGGGACCTGATTTCTTACACCCCAATACCATCGGAGCTC	intergenic							5	21.9828	2.45604	3.94846	5	5	5	20.8598	24.5644	20.5243	2.46913	2.40305	2.49594	3.78255	4.2253	3.83753
ASHGA5P027557	0.0259624	0.0713614	2.03537	down	noncoding	ENST00000552154	RP11-554D14.7	GENCODE	452	chr12	-	108226634	108228807		TTCTGAGGTGGTAATGAATTCAAAACCCTTCTGTTCCTACTCTCATATTAAAGGTTCAAA	intergenic							18.4671	63.4174	4.55766	5.58296	21.6798	24.2619	9.4596	63.9677	62.1596	64.1248	4.97695	4.70454	3.99149	5.51381	5.66018	5.57488
ASHGA5P017968	0.00668481	0.0299115	2.32347	down	noncoding	ENST00000447773	AC007680.2	GENCODE	486	chr2	-	51429218	51448902		GCCTCCAGAGGCTGGTCTGCGATTTGCTTTGGCTGACAGAATATGATGAAGTGATGTTAT	intergenic							9.70896	44.1401	3.80668	5.02296	10.942	9.76131	8.42359	45.803	49.9003	36.717	4.0688	3.50397	3.84728	5.00872	5.32223	4.73794
ASHGA5P026133	6.88374e-05	0.00286833	2.23772	down	noncoding	BF379338R		LincRNAs identified by Khalil et al	546	chr5	+	115267145	115267687		TTGTGAGAAGCCCATTGTTCTCTGTACTGACTCAAATCAACCCCTCAATTAAGGCTTTCA	intergenic							22.9557	88.1213	4.92109	6.08311	20.7877	30.036	18.0434	98.5231	82.0151	83.8258	4.92685	4.98355	4.85286	6.17446	6.0951	5.97978
ASHGA5P053151	0.0125212	0.0445354	3.01528	down	noncoding	ENST00000454234	RP5-1185I7.1	GENCODE	1965	chr7	+	77619733	77621940		TTTGAAAACTGTAAGTGACATCTACCTCCAGGTCATATTTAATACCTTTCACAACTGGTA	intergenic							13.7341	75.0085	4.23484	5.82713	11.152	11.3164	18.7338	72.0854	65.8746	87.0655	4.0938	3.70564	4.90508	5.6919	5.75093	6.03857
ASHGA5P026085	0.0013728	0.0115858	2.62539	down	noncoding	NR_046405	TXNDC12	RefSeq	3188	chr1	-	52497768	52521843		CCTATAACATTTGGCATAAATAACTGATGCCATTATAGTCTCTGTATCTCCTTTCTGAGA	exon sense-overlapping	NM_015913	TXNDC12	thioredoxin domain-containing protein 12 precursor	-	52485803	52521843	21.3049	91.9488	4.76017	6.1527	15.3512	32.8531	15.7105	95.2062	88.2843	92.3558	4.52055	5.09769	4.66227	6.12457	6.20669	6.12683
ASHGA5P026085	0.0013728	0.0115858	2.62539	down	noncoding	NR_046405	TXNDC12	RefSeq	3188	chr1	-	52497768	52521843		CCTATAACATTTGGCATAAATAACTGATGCCATTATAGTCTCTGTATCTCCTTTCTGAGA	exon sense-overlapping	NM_138417	KTI12	protein KTI12 homolog	-	52497776	52499472	21.3049	91.9488	4.76017	6.1527	15.3512	32.8531	15.7105	95.2062	88.2843	92.3558	4.52055	5.09769	4.66227	6.12457	6.20669	6.12683
ASHGA5P021448	0.000538205	0.00709522	2.2962	down	noncoding	ENST00000532579	RP11-677M14.3	GENCODE	678	chr11	+	124632326	124635257		GAGGGGTGAGACTGTTCTGGCCAAAGAGACTGGAGATCCAGTATCAGCAAGCTACTTTCT	bidirectional	NM_138961	ESAM	endothelial cell-selective adhesion molecule precursor	-	124623018	124632223	82.6759	273.742	6.59868	7.79792	84.2429	99.9266	63.8582	266.983	240.299	313.943	6.7592	6.5167	6.52014	7.68622	7.73755	7.96999
ASHGA5P044501	0.00855601	0.0350463	2.33826	down	noncoding	ENST00000533992	RP11-94A24.1	GENCODE	553	chr8	-	123426570	123440790		CCTTTCTCCTACCAATTTAATCTGCAATCACTTCAAGAGAAGTCTGTTTAAAGGATATTC	intergenic							8.47228	36.8561	3.52665	4.75208	6.298	13.8442	5.27466	37.7592	39.9054	32.9037	3.35117	3.97106	3.25772	4.71164	4.9792	4.5654
ASHGA5P043653	0.0059081	0.0276902	2.04043	down	noncoding	ENST00000438639	AC004870.4	GENCODE	609	chr7	+	47009318	47012290		TTGTGATTCAGCCCTGGATGAGTTGTCTCCACATTACTTATCATATAAGAGAAAAACCAA	intergenic							15.3383	56.4641	4.37156	5.40043	17.0244	19.0181	9.97227	63.5451	54.9596	50.8877	4.6634	4.38586	4.06543	5.50367	5.46565	5.23199
ASHGA5P055806	0.00668884	0.0299115	3.10107	down	noncoding	uc010thk.1	LOC647264	UCSC_knowngene	407	chr13	+	64320959	64321366		GCTATTCTTCCTGCTAAAACATCACTGTCAGAGGACAATTTGCTTCTAAAATGACACGGC	exon sense-overlapping	ENST00000453638	AL445989.1	Uncharacterized protein [Source:UniProtKB/TrEMBL;Acc:F5H8E9]	+	64320933	64321323	7.27709	44.9965	3.42984	5.06261	8.06895	5.58268	8.17963	44.4487	44.6394	45.9014	3.66907	2.81181	3.80864	4.96313	5.14957	5.07512
ASHGA5P047013	0.000453196	0.00654823	2.27623	down	noncoding	NR_038444	LOC728558	RefSeq	4262	chr10	-	97512962	97849992		GCACCCTCCTCAGCATCATGAAAATACTATGGTTAAGTATATATTATCACCAATTCATAC	intronic antisense	NM_001001732	CC2D2B	protein CC2D2B isoform 2	+	97759847	97792441	236.181	671.252	7.97484	9.16148	227.208	275.52	205.814	730.882	670.494	612.38	8.05829	7.83181	8.03441	9.2156	9.27629	8.99256
ASHGA5P047013	0.000453196	0.00654823	2.27623	down	noncoding	NR_038444	LOC728558	RefSeq	4262	chr10	-	97512962	97849992		GCACCCTCCTCAGCATCATGAAAATACTATGGTTAAGTATATATTATCACCAATTCATAC	intronic antisense	NM_001130446	C10orf131	uncharacterized protein C10orf131	+	97667721	97698415	236.181	671.252	7.97484	9.16148	227.208	275.52	205.814	730.882	670.494	612.38	8.05829	7.83181	8.03441	9.2156	9.27629	8.99256
ASHGA5P047013	0.000453196	0.00654823	2.27623	down	noncoding	NR_038444	LOC728558	RefSeq	4262	chr10	-	97512962	97849992		GCACCCTCCTCAGCATCATGAAAATACTATGGTTAAGTATATATTATCACCAATTCATAC	intronic antisense	NM_001134375	CCNJ	cyclin-J isoform 1	+	97803158	97820625	236.181	671.252	7.97484	9.16148	227.208	275.52	205.814	730.882	670.494	612.38	8.05829	7.83181	8.03441	9.2156	9.27629	8.99256
ASHGA5P047013	0.000453196	0.00654823	2.27623	down	noncoding	NR_038444	LOC728558	RefSeq	4262	chr10	-	97512962	97849992		GCACCCTCCTCAGCATCATGAAAATACTATGGTTAAGTATATATTATCACCAATTCATAC	intronic antisense	NM_001134376	CCNJ	cyclin-J isoform 3	+	97803158	97820625	236.181	671.252	7.97484	9.16148	227.208	275.52	205.814	730.882	670.494	612.38	8.05829	7.83181	8.03441	9.2156	9.27629	8.99256
ASHGA5P047013	0.000453196	0.00654823	2.27623	down	noncoding	NR_038444	LOC728558	RefSeq	4262	chr10	-	97512962	97849992		GCACCCTCCTCAGCATCATGAAAATACTATGGTTAAGTATATATTATCACCAATTCATAC	intronic antisense	NM_001159747	CC2D2B	protein CC2D2B isoform 1	+	97759847	97792441	236.181	671.252	7.97484	9.16148	227.208	275.52	205.814	730.882	670.494	612.38	8.05829	7.83181	8.03441	9.2156	9.27629	8.99256
ASHGA5P047013	0.000453196	0.00654823	2.27623	down	noncoding	NR_038444	LOC728558	RefSeq	4262	chr10	-	97512962	97849992		GCACCCTCCTCAGCATCATGAAAATACTATGGTTAAGTATATATTATCACCAATTCATAC	intronic antisense	NM_019084	CCNJ	cyclin-J isoform 2	+	97803158	97820625	236.181	671.252	7.97484	9.16148	227.208	275.52	205.814	730.882	670.494	612.38	8.05829	7.83181	8.03441	9.2156	9.27629	8.99256
ASHGA5P047013	0.000453196	0.00654823	2.27623	down	noncoding	NR_038444	LOC728558	RefSeq	4262	chr10	-	97512962	97849992		GCACCCTCCTCAGCATCATGAAAATACTATGGTTAAGTATATATTATCACCAATTCATAC	natural antisense	NM_001098175	ENTPD1	ectonucleoside triphosphate diphosphohydrolase 1 isoform 2	+	97471535	97637023	236.181	671.252	7.97484	9.16148	227.208	275.52	205.814	730.882	670.494	612.38	8.05829	7.83181	8.03441	9.2156	9.27629	8.99256
ASHGA5P047013	0.000453196	0.00654823	2.27623	down	noncoding	NR_038444	LOC728558	RefSeq	4262	chr10	-	97512962	97849992		GCACCCTCCTCAGCATCATGAAAATACTATGGTTAAGTATATATTATCACCAATTCATAC	natural antisense	NM_001164178	ENTPD1	ectonucleoside triphosphate diphosphohydrolase 1 isoform 3	+	97515408	97637023	236.181	671.252	7.97484	9.16148	227.208	275.52	205.814	730.882	670.494	612.38	8.05829	7.83181	8.03441	9.2156	9.27629	8.99256
ASHGA5P047013	0.000453196	0.00654823	2.27623	down	noncoding	NR_038444	LOC728558	RefSeq	4262	chr10	-	97512962	97849992		GCACCCTCCTCAGCATCATGAAAATACTATGGTTAAGTATATATTATCACCAATTCATAC	natural antisense	NM_001164179	ENTPD1	ectonucleoside triphosphate diphosphohydrolase 1 isoform 4	+	97515672	97637023	236.181	671.252	7.97484	9.16148	227.208	275.52	205.814	730.882	670.494	612.38	8.05829	7.83181	8.03441	9.2156	9.27629	8.99256
ASHGA5P047013	0.000453196	0.00654823	2.27623	down	noncoding	NR_038444	LOC728558	RefSeq	4262	chr10	-	97512962	97849992		GCACCCTCCTCAGCATCATGAAAATACTATGGTTAAGTATATATTATCACCAATTCATAC	natural antisense	NM_001164181	ENTPD1	ectonucleoside triphosphate diphosphohydrolase 1 isoform 5	+	97515408	97637023	236.181	671.252	7.97484	9.16148	227.208	275.52	205.814	730.882	670.494	612.38	8.05829	7.83181	8.03441	9.2156	9.27629	8.99256
ASHGA5P047013	0.000453196	0.00654823	2.27623	down	noncoding	NR_038444	LOC728558	RefSeq	4262	chr10	-	97512962	97849992		GCACCCTCCTCAGCATCATGAAAATACTATGGTTAAGTATATATTATCACCAATTCATAC	natural antisense	NM_001164182	ENTPD1	ectonucleoside triphosphate diphosphohydrolase 1 isoform 6	+	97515672	97637023	236.181	671.252	7.97484	9.16148	227.208	275.52	205.814	730.882	670.494	612.38	8.05829	7.83181	8.03441	9.2156	9.27629	8.99256
ASHGA5P047013	0.000453196	0.00654823	2.27623	down	noncoding	NR_038444	LOC728558	RefSeq	4262	chr10	-	97512962	97849992		GCACCCTCCTCAGCATCATGAAAATACTATGGTTAAGTATATATTATCACCAATTCATAC	natural antisense	NM_001164183	ENTPD1	ectonucleoside triphosphate diphosphohydrolase 1 isoform 6	+	97515672	97637023	236.181	671.252	7.97484	9.16148	227.208	275.52	205.814	730.882	670.494	612.38	8.05829	7.83181	8.03441	9.2156	9.27629	8.99256
ASHGA5P047013	0.000453196	0.00654823	2.27623	down	noncoding	NR_038444	LOC728558	RefSeq	4262	chr10	-	97512962	97849992		GCACCCTCCTCAGCATCATGAAAATACTATGGTTAAGTATATATTATCACCAATTCATAC	natural antisense	NM_001776	ENTPD1	ectonucleoside triphosphate diphosphohydrolase 1 isoform 1	+	97515672	97637023	236.181	671.252	7.97484	9.16148	227.208	275.52	205.814	730.882	670.494	612.38	8.05829	7.83181	8.03441	9.2156	9.27629	8.99256
ASHGA5P026524	0.000395757	0.00612257	3.03261	down	noncoding	TCONS_00011944	XLOC_005453	LincRNAs identified by Cabili et al	251	chr6	+	123193679	123194423		GAGCTTCATCATATGCCGAATGATTACATATCCCCGAGTCTGTTTTTAGATATGAATTTA	intergenic							5	23.7939	2.45604	4.0566	5	5	5	29.6664	20.344	21.3714	2.46913	2.40305	2.49594	4.34322	3.9292	3.89739
ASHGA5P038576	0.000300456	0.00529648	2.04558	down	noncoding	ENST00000457125	RP11-706D8.3	GENCODE	522	chr3	-	177055415	177066954		GGCCTAAAACATCTGCCCTCTTATAGCTGTTTTATTATTATGTAAACATGGCTACAAGAT	intergenic							51.1911	160.386	5.96137	6.99388	48.9253	68.1375	36.5104	161.419	152.077	167.664	6.0512	6.0326	5.8003	6.92533	7.03865	7.01767
ASHGA5P015290	0.014182	0.048147	3.84918	down	noncoding	ENST00000418874	AP006748.1	GENCODE	346	chr21	-	42948061	42953246		TGTCTCATCTGCACCTGGGCACGTGGTCATGTTGGATAACCCACGTGGCAGGAACTAAGG	intergenic							5	33.0665	2.45604	4.40059	5	5	5	56.7347	19.8219	22.643	2.46913	2.40305	2.49594	5.33297	3.88714	3.98167
ASHGA5P056535	0.00137046	0.0115801	2.58783	down	noncoding	TCONS_00005968	XLOC_002601	LincRNAs identified by Cabili et al	1025	chr3	+	25913583	26020527		TAGAGAAACTTTCTGTGGCTTAACTGGTCTCAGCTTGGCATCTCTCTTGTAGTTGAAGTC	natural antisense	ENST00000451284	AC103588.1	HCG1813935; Uncharacterized protein [Source:UniProtKB/TrEMBL;Acc:C9JLB4]	-	25900023	25915189	26.9357	112.784	5.07831	6.45005	24.874	39.2079	16.7252	119.695	104.421	114.236	5.16254	5.32667	4.74572	6.45907	6.45371	6.43739
ASHGA5P057959	7.48837e-05	0.00296732	2.96841	down	noncoding	TCONS_00024415	XLOC_011725	LincRNAs identified by Cabili et al	217	chr16	+	52615179	52624898		AATATACTTGGTGGACAGAGATAACTCCTTTCAGCACAGAGGTCAGTTCCATGTACCCAC	intergenic							5	23.2589	2.45604	4.02573	5	5	5	24.6397	19.5101	25.627	2.46913	2.40305	2.49594	4.04218	3.8628	4.17222
ASHGA5P053758	0.00186614	0.013823	2.0184	down	noncoding	ENST00000422343	RP11-180I4.2	GENCODE	403	chr9	+	98412435	98478000		GCCCCCTCCAACCAACCTTGATTGTGAAATGATGATGAAATAAACCTTCATTATGGTGTG	intergenic							1349.54	3033.74	10.3388	11.352	1290.15	1839.34	919.127	3225.05	2996.5	2879.68	10.4527	10.4868	10.0767	11.3804	11.4106	11.2649
ASHGA5P049169	0.000876557	0.00909886	2.31289	down	noncoding	TCONS_00023648	XLOC_011448	LincRNAs identified by Cabili et al	10347	chr15	-	41578206	41598741	TCONS_00024099	GGTTGCAGAGCCCCACAAACTCCAGTAGTATCACTTATTCTATTGTACAACCTTGCTAAT	intergenic							80.8922	273.688	6.59516	7.80485	73.1895	89.4918	79.9954	299.003	255.877	266.185	6.58674	6.37868	6.82007	7.86512	7.83636	7.71308
ASHGA5P023413	0.0371186	0.091126	2.06121	down	noncoding	ENST00000580422	RP11-849N15.4	GENCODE	538	chr17	-	15283180	15321195		GATTTTCATGCTACTCTCTAGCCATACACATCAGTTTGCAAATTCAATCTTATGAAAAGG	intergenic							5.96085	22.5784	2.94743	3.99092	7.5138	5.36875	5	23.4315	24.0479	20.2557	3.56886	2.77748	2.49594	3.96468	4.19258	3.81551
ASHGA5P033170	6.92535e-05	0.00286833	2.95208	down	noncoding	ENST00000581213	RP11-6N17.1	GENCODE	816	chr17	+	45940707	45942556		CAAACGAATTCGTTTCGCTCTTGTGAAACTGAAGACAATTTCCTTTTCTGTCATAAAACA	intergenic							5	22.9431	2.45604	4.01777	5	5	5	23.6335	23.939	21.257	2.46913	2.40305	2.49594	3.98035	4.18416	3.88881
ASHGA5P048938	0.00540027	0.0261926	2.07655	down	noncoding	TCONS_00025843	XLOC_012114	LincRNAs identified by Cabili et al	614	chr17	+	13523045	13530958		GCTATGGCCTCCGAAGAAAAATTGATACACAAATAAACTGGTCTTTTGCCTAGACTGTGT	intergenic							21.0008	76.9305	4.82469	5.87888	23.1148	22.1238	17.7638	79.7477	83.1674	67.8763	5.06502	4.57653	4.83253	5.85454	6.11665	5.66546
ASHGA5P044871	4.68441e-05	0.00242218	2.95081	down	noncoding	ENST00000521084	RP11-326E22.1	GENCODE	393	chr8	+	72067756	72074807		CAGAAGGATGGCTTCCTAAATGATTTTTCCTTATGCTATATGTGCCAATAGATATCACTA	intergenic							5	23.0159	2.45604	4.01715	5	5	5	21.9976	22.042	25.0081	2.46913	2.40305	2.49594	3.86847	4.04958	4.1334
ASHGA5P058221	0.000122268	0.00358719	2.56813	down	noncoding	TCONS_00028278	XLOC_013623	LincRNAs identified by Cabili et al	565	chr20	-	1166481	1168514		AACAAATTACTTGGCCTAGCCCTCAAAGCCTGCACATTCACAATCCTCATGGACAGAAGT	intergenic							29.5816	126.967	5.27348	6.6342	26.5359	36.3532	25.8557	127.97	130.889	122.042	5.25146	5.22966	5.33933	6.56093	6.80522	6.53644
ASHGA5P037628	0.00914579	0.0366241	2.89731	down	noncoding	ENST00000414989	RP11-259P1.1	GENCODE	535	chr22	-	26637296	26650058		ACTTGACCTCTACGAAGGATGAACATTTCCCATGAGTTTTCCACTTGTGTTTCATCCTTG	intronic antisense	NM_001184773	SEZ6L	seizure 6-like protein isoform 2 precursor	+	26565439	26779563	11.5265	59.3537	3.94728	5.48199	15.2722	13.3788	5.92842	60.5416	59.3014	58.2182	4.51396	3.92436	3.40352	5.42827	5.58522	5.43248
ASHGA5P037628	0.00914579	0.0366241	2.89731	down	noncoding	ENST00000414989	RP11-259P1.1	GENCODE	535	chr22	-	26637296	26650058		ACTTGACCTCTACGAAGGATGAACATTTCCCATGAGTTTTCCACTTGTGTTTCATCCTTG	intronic antisense	NM_001184774	SEZ6L	seizure 6-like protein isoform 3 precursor	+	26565439	26779563	11.5265	59.3537	3.94728	5.48199	15.2722	13.3788	5.92842	60.5416	59.3014	58.2182	4.51396	3.92436	3.40352	5.42827	5.58522	5.43248
ASHGA5P037628	0.00914579	0.0366241	2.89731	down	noncoding	ENST00000414989	RP11-259P1.1	GENCODE	535	chr22	-	26637296	26650058		ACTTGACCTCTACGAAGGATGAACATTTCCCATGAGTTTTCCACTTGTGTTTCATCCTTG	intronic antisense	NM_001184775	SEZ6L	seizure 6-like protein isoform 4 precursor	+	26565439	26779563	11.5265	59.3537	3.94728	5.48199	15.2722	13.3788	5.92842	60.5416	59.3014	58.2182	4.51396	3.92436	3.40352	5.42827	5.58522	5.43248
ASHGA5P037628	0.00914579	0.0366241	2.89731	down	noncoding	ENST00000414989	RP11-259P1.1	GENCODE	535	chr22	-	26637296	26650058		ACTTGACCTCTACGAAGGATGAACATTTCCCATGAGTTTTCCACTTGTGTTTCATCCTTG	intronic antisense	NM_001184776	SEZ6L	seizure 6-like protein isoform 5 precursor	+	26565439	26779563	11.5265	59.3537	3.94728	5.48199	15.2722	13.3788	5.92842	60.5416	59.3014	58.2182	4.51396	3.92436	3.40352	5.42827	5.58522	5.43248
ASHGA5P037628	0.00914579	0.0366241	2.89731	down	noncoding	ENST00000414989	RP11-259P1.1	GENCODE	535	chr22	-	26637296	26650058		ACTTGACCTCTACGAAGGATGAACATTTCCCATGAGTTTTCCACTTGTGTTTCATCCTTG	intronic antisense	NM_001184777	SEZ6L	seizure 6-like protein isoform 6 precursor	+	26565439	26779563	11.5265	59.3537	3.94728	5.48199	15.2722	13.3788	5.92842	60.5416	59.3014	58.2182	4.51396	3.92436	3.40352	5.42827	5.58522	5.43248
ASHGA5P037628	0.00914579	0.0366241	2.89731	down	noncoding	ENST00000414989	RP11-259P1.1	GENCODE	535	chr22	-	26637296	26650058		ACTTGACCTCTACGAAGGATGAACATTTCCCATGAGTTTTCCACTTGTGTTTCATCCTTG	intronic antisense	NM_021115	SEZ6L	seizure 6-like protein isoform 1 precursor	+	26565439	26779563	11.5265	59.3537	3.94728	5.48199	15.2722	13.3788	5.92842	60.5416	59.3014	58.2182	4.51396	3.92436	3.40352	5.42827	5.58522	5.43248
ASHGA5P000200	0.00105296	0.00993627	2.0037	down	noncoding	chr10:44057525-44069225+	chr10:44057525-44069225	LincRNAs identified by Khalil et al	11700	chr10	+	44737519	44749219		AGAAGACATTGCTCATAATCCCCTGTCAGCACAAGAGTCTGCCCAGAAATAGAAACACAG	intergenic							43.227	138.84	5.77018	6.77285	43.1813	50.5636	35.936	145.157	143.463	127.899	5.88455	5.64838	5.77761	6.76523	6.94329	6.61003
ASHGA5P031872	0.00595486	0.0278138	2.14195	down	noncoding	ENST00000571975	RP11-96D1.10	GENCODE	3022	chr16	+	68258615	68261637		TTGGGCATCATATGGCTAATCACTCAGAGGTCACTAATCACTCTCCCTTTTCTTGTTTTT	exon sense-overlapping	NM_004555	NFATC3	nuclear factor of activated T-cells, cytoplasmic 3 isoform 2	+	68119268	68263162	439.547	1068.56	8.73051	9.82944	289.518	669.336	359.787	1058.77	913.449	1233.46	8.37973	9.01812	8.79368	9.76307	9.72398	10.0013
ASHGA5P031872	0.00595486	0.0278138	2.14195	down	noncoding	ENST00000571975	RP11-96D1.10	GENCODE	3022	chr16	+	68258615	68261637		TTGGGCATCATATGGCTAATCACTCAGAGGTCACTAATCACTCTCCCTTTTCTTGTTTTT	exon sense-overlapping	NM_173163	NFATC3	nuclear factor of activated T-cells, cytoplasmic 3 isoform 3	+	68119268	68263162	439.547	1068.56	8.73051	9.82944	289.518	669.336	359.787	1058.77	913.449	1233.46	8.37973	9.01812	8.79368	9.76307	9.72398	10.0013
ASHGA5P031872	0.00595486	0.0278138	2.14195	down	noncoding	ENST00000571975	RP11-96D1.10	GENCODE	3022	chr16	+	68258615	68261637		TTGGGCATCATATGGCTAATCACTCAGAGGTCACTAATCACTCTCCCTTTTCTTGTTTTT	exon sense-overlapping	NM_173165	NFATC3	nuclear factor of activated T-cells, cytoplasmic 3 isoform 1	+	68119268	68263162	439.547	1068.56	8.73051	9.82944	289.518	669.336	359.787	1058.77	913.449	1233.46	8.37973	9.01812	8.79368	9.76307	9.72398	10.0013
ASHGA5P050390	0.0428965	0.101017	2.21586	down	noncoding	ENST00000451644	AC096559.1	GENCODE	623	chr2	+	12147241	12271711		CCTGAAAAGTGTTGTATTCCAGTGTGCCTCGGAAAAGAAAATAGGATTAATAAACTTTGA	intergenic							7.61587	28.9912	3.22663	4.37451	8.32696	9.52064	5	31.5296	30.3976	25.0464	3.71003	3.47393	2.49594	4.43636	4.55288	4.13427
ASHGA5P017392	0.0329406	0.083621	2.02907	down	noncoding	ENST00000440947	RP11-120J1.1	GENCODE	793	chr9	+	14347318	14357907		CACCCTCAAGGTCTGCAGGACACACCAAAGAACTCCTCCAAGTCACACAAGGGAGAAAAT	intronic antisense	NM_001190738	NFIB	nuclear factor 1 B-type isoform 2	-	14081841	14398982	11.865	45.8197	4.06714	5.08796	13.7285	9.49057	12.376	46.2615	49.5098	41.6878	4.37044	3.47061	4.36037	5.02195	5.30898	4.93294
ASHGA5P022099	0.000173	0.00412477	3.22057	down	noncoding	ENST00000549103	RP11-136F16.1	GENCODE	475	chr12	-	78445960	78485517		TCTTAGCATCTTCCGCACAGGTCGTGTCACCCTTCAAACATAAGCTTTTCATGAATGAAG	intronic antisense	NM_014903	NAV3	neuron navigator 3	+	78225068	78606790	11.5879	68.0491	4.00409	5.6914	10.8689	15.6037	8.29107	67.4428	70.782	65.9226	4.05938	4.12509	3.82779	5.59363	5.86333	5.61725
ASHGA5P033519	0.0036135	0.0202978	2.42268	down	noncoding	ENST00000579413	RP11-856M7.4	GENCODE	422	chr18	-	10627642	10628843	NR_049896	TAGGTCCATTTTGGGTTTACTCCTTTGTGCTGCTTCATGATGCCTTAGGACAAGGACAAG	intergenic							20.683	85.4657	4.7604	6.03701	23.4606	25.6286	12.9598	96.8027	81.3452	78.2492	5.08358	4.77778	4.41985	6.1509	6.08258	5.87755
ASHGA5P039647	0.0157267	0.0513523	2.62243	down	noncoding	ENST00000507849	RP11-563M4.1	GENCODE	481	chr4	-	149948596	149983674		GCTGACCTGCATGACCTACAACATGCACCTAGCAATCATTTATGTATTTGATATATTTTT	intergenic							8.11956	42.1253	3.54023	4.93113	11.0182	7.44687	5.89362	53.2027	40.7306	32.4425	4.07844	3.14625	3.39599	5.23531	5.0136	4.54447
ASHGA5P056761	0.000154481	0.00398469	2.49947	down	noncoding	TCONS_00008464	XLOC_003925	LincRNAs identified by Cabili et al	405	chr4	-	38194960	38208228		ACAATCTATTGCTCCAGAAGAGTTCATCTTTTGCCCTAGTCCATTTCCTCTTGCACTGCT	intergenic							58.4969	216.389	6.12333	7.44495	52.5692	80.5366	42.3851	240.864	200.397	207.905	6.14148	6.24682	5.98169	7.52849	7.46635	7.34001
ASHGA5P052394	0.00819284	0.0341409	4.57681	down	noncoding	ENST00000435042	AC004041.2	GENCODE	472	chr5	-	131973767	131999964		CGCCTGGGATTTTCCTGACCTGTTACTACTTTTCTCTGGAAGAAAAATTTAAAAGTAATA	intronic antisense	NM_002188	IL13	interleukin-13 precursor	+	131993864	131996801	8.51951	62.2302	3.3535	5.54784	10.3852	10.1733	5	69.831	57.7823	59.0773	3.999	3.56555	2.49594	5.64819	5.54095	5.45438
ASHGA5P052394	0.00819284	0.0341409	4.57681	down	noncoding	ENST00000435042	AC004041.2	GENCODE	472	chr5	-	131973767	131999964		CGCCTGGGATTTTCCTGACCTGTTACTACTTTTCTCTGGAAGAAAAATTTAAAAGTAATA	natural antisense	NM_005732	RAD50	DNA repair protein RAD50	+	131892615	131980313	8.51951	62.2302	3.3535	5.54784	10.3852	10.1733	5	69.831	57.7823	59.0773	3.999	3.56555	2.49594	5.64819	5.54095	5.45438
ASHGA5P029924	0.00921244	0.0367504	2.06025	down	noncoding	ENST00000559246	RP11-323I15.5	GENCODE	1342	chr15	-	35391222	35461899		GATGTGATGAGGGTTTGTTTTAAGTAAAGGGTGAATGTGACTTTCATTATTCTCTGTGAT	intergenic							5	16.6193	2.45604	3.49886	5	5	5	14.1927	20.2617	15.4034	2.46913	2.40305	2.49594	3.18439	3.92135	3.39084
ASHGA5P044186	0.000127335	0.00363439	2.76404	down	noncoding	ENST00000520023	EXTL3-AS1	GENCODE	780	chr8	-	28555919	28558981		GTAACTTAACACATTGCTGCCCTTAACTTTGACTTACTTGCTTTTAAAGATGATGAAGCT	intronic antisense	ENST00000523149	EXTL3	exostoses (multiple)-like 3 [Source:HGNC Symbol;Acc:3518]	+	28480245	28608420	23.1462	110.753	4.96098	6.42776	23.3484	25.7359	20.3544	114.874	108.229	109.155	5.0782	4.78288	5.02187	6.39872	6.51286	6.37171
ASHGA5P044186	0.000127335	0.00363439	2.76404	down	noncoding	ENST00000520023	EXTL3-AS1	GENCODE	780	chr8	-	28555919	28558981		GTAACTTAACACATTGCTGCCCTTAACTTTGACTTACTTGCTTTTAAAGATGATGAAGCT	natural antisense	ENST00000220562	EXTL3	exostoses (multiple)-like 3 [Source:HGNC Symbol;Acc:3518]	+	28558843	28611204	23.1462	110.753	4.96098	6.42776	23.3484	25.7359	20.3544	114.874	108.229	109.155	5.0782	4.78288	5.02187	6.39872	6.51286	6.37171
ASHGA5P040802	0.00461583	0.0237575	2.2207	down	noncoding	TCONS_00021731	XLOC_010311	LincRNAs identified by Cabili et al	3893	chr13	+	24079514	24099623		TCTGGTGGTAGATGCTTCACTTCTTCATTTATGACTCCACATTCGTGGAAGAGAGCAAAG	intergenic							5	17.8107	2.45604	3.60706	5	5	5	16.6177	21.3701	15.4443	2.46913	2.40305	2.49594	3.42054	4.00528	3.39535
ASHGA5P021805	0.00724128	0.0314534	2.21209	down	noncoding	ENST00000541288	RP11-153K16.1	GENCODE	641	chr12	+	23252301	23341472		TCAATGTCAGGCCTCCAAAGAAGTCTACAAATTCCATCAGTCAGTAACGGCTTGGAGTTC	intergenic							5	18.0937	2.45604	3.60146	5	5	5	19.5203	12.5811	22.1798	2.46913	2.40305	2.49594	3.67332	3.18043	3.95062
ASHGA5P043771	0.000363096	0.00586507	2.68401	down	noncoding	ENST00000450977	AC003984.1	GENCODE	4104	chr7	+	84161791	84204159		TTGTGGCTATCTAATAATTTGAAAGTACCATGCTCAATTCTTGTTACTGCACAGTTTCCA	intergenic							5	21.0803	2.45604	3.88043	5	5	5	19.1543	22.2922	21.7946	2.46913	2.40305	2.49594	3.64558	4.06826	3.92745
ASHGA5P016208	0.0150509	0.0500697	2.13401	down	noncoding	ENST00000427929	AC104695.3	GENCODE	2850	chr2	-	28607275	28617539		CTTGCTCCAGGATCTGCACAAGCAGAGGCGGCACAGGGTTTGGCTTCCAGTTGGGAAATG	intronic antisense	NM_005253	FOSL2	fos-related antigen 2	+	28615778	28637516	12.5454	49.6772	4.10816	5.20173	8.28196	14.5958	14.7583	56.3419	42.1391	50.5506	3.70126	4.03923	4.584	5.32165	5.06458	5.21896
ASHGA5P045008	0.00313911	0.0186378	2.72924	down	noncoding	ENST00000529135	RP11-6D1.6	GENCODE	495	chr8	+	125952590	125966570		GAACCCATAGTGACCTTTCCTTCTGATTCTTCTTTTACTCTAAGGGCATGATTTTGGCAA	intergenic							21.4762	94.0768	4.74082	6.18931	14.9297	35.0037	14.4952	92.226	92.3128	97.6914	4.48457	5.17922	4.55867	6.07774	6.27555	6.21466
ASHGA5P047435	0.000120069	0.00355051	2.31461	down	noncoding	ENST00000517854	RP11-131N11.4	GENCODE	434	chr10	+	62494099	62501586		TGCTATCTGTTTTCCATTACTTGCCTTCTCTTACCCTGAAATTATGCATCTGGAATGAAG	bidirectional	NM_001204403	ANK3	ankyrin-3 isoform 3	-	61786055	62493284	64.5943	224.282	6.28825	7.49901	65.1382	75.448	53.1968	243.694	205.033	224.119	6.42568	6.16307	6.27599	7.54846	7.50228	7.4463
ASHGA5P021761	0.0171649	0.0542871	5.29701	down	noncoding	ENST00000540250	RP11-173C20.1	GENCODE	1190	chr12	+	127227282	127229878	NR_038256	GGAATACTCTAGAGTCAAGGGATTGGATTGTGGATTGCATTGGTGGTTTTCCTCAGTTTC	intergenic							8.18552	68.0117	3.28593	5.69111	5	6.09338	13.4632	66.1918	70.191	67.6523	2.46913	2.91674	4.47194	5.56435	5.8494	5.6596
ASHGA5P016044	0.0269411	0.0732073	3.41139	down	noncoding	ENST00000426178	RP11-38C18.3	GENCODE	537	chr1	+	165187651	165188284		ATCTACTGTGTTCAGGGGCAGACCTGCCTGACTTGGATATCAGCTTCTCCATGAAAATAT	intronic antisense	NM_001174069	LMX1A	LIM homeobox transcription factor 1-alpha	-	165171103	165325478	8.18995	37.2575	3.00047	4.77083	5	14.5699	5	38.7111	34.2409	38.8204	2.46913	4.03635	2.49594	4.75015	4.74032	4.82203
ASHGA5P016044	0.0269411	0.0732073	3.41139	down	noncoding	ENST00000426178	RP11-38C18.3	GENCODE	537	chr1	+	165187651	165188284		ATCTACTGTGTTCAGGGGCAGACCTGCCTGACTTGGATATCAGCTTCTCCATGAAAATAT	intronic antisense	NM_177398	LMX1A	LIM homeobox transcription factor 1-alpha	-	165171103	165325952	8.18995	37.2575	3.00047	4.77083	5	14.5699	5	38.7111	34.2409	38.8204	2.46913	4.03635	2.49594	4.75015	4.74032	4.82203
ASHGA5P028756	0.000604358	0.00752372	2.95931	down	noncoding	ENST00000440633	LINC00545	GENCODE	411	chr13	+	31456687	31457532		TATTCCTTCCAGAAGGAAATTACAGACCACTCTCTGTTTCTACTCAACTGCTTTTCACTC	intergenic							11.6521	64.1813	4.0344	5.59967	13.464	12.6815	8.81073	69.5004	60.9144	62.1291	4.34391	3.85472	3.90458	5.64178	5.62878	5.52844
ASHGA5P027643	0.00230601	0.0157311	2.44823	down	noncoding	ENST00000437156	RP11-5P18.5	GENCODE	466	chr1	-	16332654	16333166		TTTCAGATGCCCCTTAGCGGATCTAATGATGTTTCCTTGGCTCAAGCACAAAAGACTCCT	natural antisense	NM_178840	C1orf64	uncharacterized protein C1orf64	+	16330730	16333184	11.2539	52.5192	4.00166	5.29339	9.46217	12.4298	11.8697	51.7726	56.8061	48.9788	3.87333	3.82928	4.30236	5.19796	5.51381	5.1684
ASHGA5P043741	0.0187744	0.0576284	2.39862	down	noncoding	ENST00000404291	STAG3L1	GENCODE	496	chr7	+	74995622	75024657	ENST00000448772, ENST00000456374, NM_012447, NR_040582, NR_040583, NR_040584, uc003ucx.3	AGCCCAGGTGCCCAGAGGACTTTCTTCCAGCTTCTGCTGTCCTTCTTTGTGGAGAGCAAG	exon sense-overlapping	ENST00000450434	TRIM73	tripartite motif containing 73 [Source:HGNC Symbol;Acc:18162]	+	75024336	75034896	963.05	2518.38	9.78337	11.0456	723.291	1540.27	625.588	2235.49	1931.15	3388.5	9.60189	10.2329	9.51529	10.8359	10.7748	11.526
ASHGA5P018281	0.00216249	0.0150883	4.96568	down	noncoding	ENST00000451564	TLR8-AS1	GENCODE	1349	chrX	-	12920935	12926452	NR_030727	ACATTGCTTCATCTTTGTTCCACAAGTTTCTGAGACAGCACCGACTTCACACATTCCTGG	intronic antisense	NM_138636	TLR8	toll-like receptor 8 precursor	+	12924738	12941288	5.88821	52.1985	2.9645	5.27649	5	6.83634	5.82829	48.4134	62.2418	45.9402	2.46913	3.04187	3.38249	5.09026	5.66258	5.07663
ASHGA5P022390	0.00667865	0.0299115	2.95021	down	noncoding	ENST00000556019	RP11-58E21.5	GENCODE	462	chr14	-	50508360	50519629		AATTACACAGATCTGCATGGAACAATGCTGCTTCTCTGCATGACTAGAGTTTGTTTTCTC	intergenic							5.85368	31.5206	2.93013	4.49095	6.71855	5.84249	5	38.7935	27.4411	28.3272	3.42942	2.86502	2.49594	4.75436	4.3905	4.32797
ASHGA5P035012	8.39032e-05	0.00309699	2.81163	down	noncoding	ENST00000413669	AC009236.1	GENCODE	343	chr2	-	45401480	45402350	NR_033831	GTTGTCTTCCCTTCCTAGAAGCAATGCTTCTATGTTCTCATTTGATGTTGAATAAAACAT	intergenic							230.273	783.984	7.90015	9.39156	178.447	325.233	187.138	805.022	714.583	832.348	7.74106	8.04448	7.9149	9.35968	9.37107	9.44392
ASHGA5P044448	0.000776833	0.00857084	2.31014	down	noncoding	ENST00000523121	KB-1410C5.2	GENCODE	979	chr8	-	102273768	102275131		CCTCACCTCCAAGTTTGATTTTATAGAACAACCAATAAATGTGGTTTCACCTTCCTTGAG	intergenic							43.4508	158.487	5.76206	6.97004	46.4045	52.4761	31.4717	153.465	146.688	175.308	5.98061	5.69754	5.60804	6.84843	6.97745	7.08425
ASHGA5P042950	0.0181585	0.0563703	2.61037	down	noncoding	ENST00000456777	AC003090.1	GENCODE	589	chr7	-	25634152	25790614		AAATACAGTCAATTCTGTGGCTTGATGGTGCGTGGACATAACATTCAGATATCGCCCATG	intergenic							17.9824	79.1867	4.53095	5.9152	9.39906	23.6863	20.8617	91.0096	70.0362	76.5143	3.86388	4.67155	5.05743	6.05658	5.84595	5.84308
ASHGA5P056986	0.00416931	0.0222823	3.23545	down	noncoding	TCONS_00011810	XLOC_005283	LincRNAs identified by Cabili et al	304	chr6	+	39916123	39920971		ACAATGTCCTTTCTATGCACCTTGGGAGAAGAAAGAGAATCACTGCTCCATGCAACTATT	intergenic							5.09666	29.0496	2.67903	4.37299	5.28999	5	5	30.2227	32.7768	24.1494	3.13808	2.40305	2.49594	4.37171	4.67099	4.07629
ASHGA5P058238	0.000212903	0.00452798	2.38202	down	noncoding	TCONS_00028448	XLOC_013807	LincRNAs identified by Cabili et al	777	chr20	-	54717439	54744424		AGATCCCCAGCTCAGCGCTCACTTTTGTAGTGAAGACATGCTTTAAAATCATCGAGTGTG	intergenic							12.6397	55.5698	4.12589	5.37808	11.8548	16.5355	9.52873	60.8538	55.0538	50.8017	4.17328	4.20127	4.00313	5.43686	5.46908	5.22829
ASHGA5P036441	0.001869	0.0138282	6.57338	down	noncoding	ENST00000564299	RP11-574O16.1	GENCODE	585	chr2	+	217860628	217861213		CAGAGACAGCATCCTATGGCATGGTGATCCAAAACAAGTACACCTCTACCTTTTCCCTTT	intergenic							5.55044	61.1013	2.80681	5.52345	5	5	6.65132	62.5127	58.3568	62.4345	2.46913	2.40305	3.54826	5.4775	5.55593	5.53692
ASHGA5P049685	5.56658e-05	0.00263825	2.51514	down	noncoding	TCONS_00019998	XLOC_009284	LincRNAs identified by Cabili et al	456	chr11	+	115794358	115800208		TATGTTCATGATCGGGTGAGGATTCTTGTCTCATGTCTTTCCAAGTCCTTGCAAGGCAGT	intergenic							17.7469	78.4535	4.58029	5.91093	14.5279	23.0085	15.7042	84.7856	73.7529	76.8221	4.44792	4.63094	4.662	5.95223	5.9313	5.84924
ASHGA5P042497	0.00496734	0.0248166	2.93799	down	noncoding	uc003pgq.3	AL832252	UCSC_knowngene	3360	chr6	+	73977773	74001061		CAGATAGGACTAAGCCTTTTTCATGCCTGTTTTTTGTAGAGTTTGTAGTTTAGGAATCAT	intronic antisense	NM_001251874	KHDC1	KH homology domain-containing protein 1 isoform 1	-	73951037	74019938	13.925	68.6915	4.15021	5.70503	8.208	23.111	10.4559	71.9984	67.4481	66.6279	3.69055	4.63743	4.12263	5.6901	5.78832	5.63668
ASHGA5P048308	0.000549045	0.00716086	3.09244	down	noncoding	BG900305R		LincRNAs identified by Khalil et al	381	chr3	-	187467858	187468152		AAAAAATGCAGGCACAACACGCAAATCAAGTTTTTCCACTTCTAGCCTTAGGTAGTAGAG	intergenic							9.47005	56.5246	3.7759	5.40465	8.23895	10.0895	10.0817	57.3584	52.142	60.0735	3.69529	3.55317	4.07924	5.3472	5.3876	5.47914
ASHGA5P035053	2.38641e-05	0.00181963	2.24702	down	noncoding	NR_033980	FLJ16341	RefSeq	1705	chr2	-	61074894	61108449		GGATTTCCCCCGGGAGCTCTTTTTGCGAAGGATGTTTTGTTTTTCCTTTGTGAATAGGGA	bidirectional	NM_002908	REL	proto-oncogene c-Rel	+	61108751	61150178	36.058	131.357	5.5202	6.68821	30.3201	47.3749	30.4791	139.609	122.727	131.736	5.42153	5.57263	5.56643	6.70491	6.70626	6.65346
ASHGA5P056305	0.000342727	0.00570007	2.11951	down	noncoding	TCONS_00002077	XLOC_000266	LincRNAs identified by Cabili et al	244	chr1	+	79775370	79871942	TCONS_00002078, TCONS_00002079	TCTCCTAGGACATCCTGGGAGAAACTGTGACTGCTGGTGATTTTTGCTGTTAAAATAGCC	intergenic							9.27616	38.3796	3.73175	4.81548	8.47179	11.8612	7.49548	40.3862	39.8785	34.874	3.73	3.76652	3.69872	4.81405	4.97795	4.65445
ASHGA5P048814	0.0460614	0.106197	2.01182	down	noncoding	ENST00000568307	RP11-114H24.2	GENCODE	903	chr15	-	78207066	78208143		TCCTCTTGCAGGAGAGTCCTTCACCGTATATGAAAGCCAGGGGGCAGTGCCAAACACGTG	intergenic							6.53128	20.4183	2.81557	3.82407	5	9.59383	5	24.4456	18.8838	17.9255	2.46913	3.48163	2.49594	4.03168	3.81264	3.62788
ASHGA5P014912	0.00245197	0.0162818	2.0257	down	noncoding	ENST00000414699	AL773572.7	GENCODE	336	chr21	-	42552458	42558247		GTAATATCAGGCACAAAGGAAGGGCACTACAACCACAACCAATATCAGTAAAGCTTTGGA	exon sense-overlapping	NM_182832	PLAC4	placenta-specific protein 4	-	42547157	42557166	20.8964	74.5071	4.81069	5.82911	21.5117	24.365	16.8126	75.8234	80.8246	66.8732	4.96728	4.70996	4.75483	5.77281	6.07208	5.64243
ASHGA5P014912	0.00245197	0.0162818	2.0257	down	noncoding	ENST00000414699	AL773572.7	GENCODE	336	chr21	-	42552458	42558247		GTAATATCAGGCACAAAGGAAGGGCACTACAACCACAACCAATATCAGTAAAGCTTTGGA	intronic antisense	NM_012105	BACE2	beta-secretase 2 isoform A preproprotein	+	42539727	42648524	20.8964	74.5071	4.81069	5.82911	21.5117	24.365	16.8126	75.8234	80.8246	66.8732	4.96728	4.70996	4.75483	5.77281	6.07208	5.64243
ASHGA5P014912	0.00245197	0.0162818	2.0257	down	noncoding	ENST00000414699	AL773572.7	GENCODE	336	chr21	-	42552458	42558247		GTAATATCAGGCACAAAGGAAGGGCACTACAACCACAACCAATATCAGTAAAGCTTTGGA	intronic antisense	NM_138991	BACE2	beta-secretase 2 isoform C preproprotein	+	42539727	42648524	20.8964	74.5071	4.81069	5.82911	21.5117	24.365	16.8126	75.8234	80.8246	66.8732	4.96728	4.70996	4.75483	5.77281	6.07208	5.64243
ASHGA5P014912	0.00245197	0.0162818	2.0257	down	noncoding	ENST00000414699	AL773572.7	GENCODE	336	chr21	-	42552458	42558247		GTAATATCAGGCACAAAGGAAGGGCACTACAACCACAACCAATATCAGTAAAGCTTTGGA	intronic antisense	NM_138992	BACE2	beta-secretase 2 isoform B preproprotein	+	42539727	42648524	20.8964	74.5071	4.81069	5.82911	21.5117	24.365	16.8126	75.8234	80.8246	66.8732	4.96728	4.70996	4.75483	5.77281	6.07208	5.64243
ASHGA5P000344	0.00211911	0.0149336	2.35001	down	noncoding	chr2:187440075-187467625+	chr2:187440075-187467625	LincRNAs identified by Khalil et al	27550	chr2	+	187731830	187759380		TTTAAGAATTCAGAGTAACTTTATTTTTCCTGACATATCAAATGTTCTCATTTTTCCTCC	intergenic							5	18.869	2.45604	3.68871	5	5	5	23.4785	17.8898	15.2387	2.46913	2.40305	2.49594	3.96715	3.72535	3.37362
ASHGA5P040141	0.031629	0.0814156	3.12221	down	noncoding	TCONS_00022707	XLOC_010995	LincRNAs identified by Cabili et al	376	chr14	-	36516919	36518080		ACTGGTGATTTGTCTTGGGGTCTTAAATTAATTTTGAGCAGCTCTGCAAGCTGTGTCCCG	intergenic							9.03038	52.8533	3.65423	5.2968	8.2869	5.58661	13.2176	53.3682	61.2371	43.9545	3.70169	2.81268	4.44832	5.24038	5.63714	5.01289
ASHGA5P022576	1.41623e-05	0.00152411	2.89205	down	noncoding	ENST00000559029	RP11-279F6.1	GENCODE	309	chr15	+	69845054	69856009		AGAGGCCAGCACGCACAGTGACTTAATCCAAGAAGATGGAATAAAAAGGCCTACCTCATT	intergenic							5	22.6188	2.45604	3.98814	5	5	5	23.6247	19.9819	24.2496	2.46913	2.40305	2.49594	3.97963	3.90001	4.08477
ASHGA5P040419	0.000661123	0.00782582	4.04931	down	noncoding	TCONS_00021823	XLOC_010424	LincRNAs identified by Cabili et al	378	chr13	+	72744953	72747692		CCTGAAGAAAAACCTTGAAAACCCAAATGACCTTGACTTGACATTTCCATAGCTGCAATG	intergenic							5.49683	34.8314	2.64763	4.6653	5	6.49047	5	35.1124	38.3109	31.0708	2.46913	2.9778	2.49594	4.60403	4.9152	4.47667
ASHGA5P049532	0.00630745	0.0289083	3.41561	down	noncoding	ENST00000584151	AC022596.2	GENCODE	719	chr17	-	16754815	16756091	ENST00000581247	TTTCTCAAATAGACTTCATTTGTCCCTTGAGGCTCAGCTCACTGCAGTTAACTAACTAAT	intergenic							7.23932	41.4576	3.15571	4.92786	6.91615	9.8018	5	47.3745	35.798	41.2003	3.46247	3.50872	2.49594	5.05669	4.81168	4.9152
ASHGA5P045502	0.00122251	0.0108843	2.75515	down	noncoding	EB385593		LincRNAs identified by Khalil et al	679	chr1	-	205332680	205333357		CTGTTACTTCCCTAAATGTATACCTAGTCCCATGACGTTTTCAGGGAATACCCTTGTATA	intergenic							5	21.6536	2.45604	3.91817	5	5	5	21.2364	25.1584	18.566	2.46913	2.40305	2.49594	3.80932	4.26403	3.68117
ASHGA5P035604	0.00133328	0.0114146	2.23228	down	noncoding	ENST00000442062	AC074019.1	GENCODE	427	chr2	-	229548252	229549296		GGTCTGAGCTACCATAGAAAAGCTTCCCGCAACCAAATGAATTACAGACACTCAGCAAAA	intergenic							5	17.8031	2.45604	3.61456	5	5	5	15.6374	17.7124	20.0594	2.46913	2.40305	2.49594	3.33436	3.71017	3.79915
ASHGA5P045405	0.00220748	0.0152541	2.64703	down	noncoding	TCONS_00000867	XLOC_000095	LincRNAs identified by Cabili et al	263	chr1	+	24348318	24350190		ATAAAAGTTGATGAAGCTGTAGCACCAGGAGTCCAAGCTGTGAAGGAAGTTGAGTCCTTC	intergenic							5.1848	22.8081	2.59049	3.99487	5	5.55439	5	26.1693	23.9642	18.2907	2.46913	2.80641	2.49594	4.14092	4.18653	3.65716
ASHGA5P049912	0.00802664	0.0336907	3.7957	down	noncoding	TCONS_00001276	XLOC_000565	LincRNAs identified by Cabili et al	1164	chr1	+	219092185	219098202		AACACGAGTGGTAAGAGTTGTCTATCAGAAATACAAAGCCAGACCCATTGCTCTCTGAAG	intergenic							6.9093	37.9399	2.86679	4.79115	5	10.7279	5	41.5542	31.9615	40.3039	2.46913	3.63529	2.49594	4.85777	4.63261	4.88307
ASHGA5P032145	0.00421813	0.0225005	2.40874	down	noncoding	TCONS_00029500	XLOC_014143	LincRNAs identified by Cabili et al	588	chr22	+	17741489	17742178		TATTCACCAATACCTTTCCCACAAACAAGAGATGCCTGAGAAAGACCTGGTCATGCAGGA	intergenic							7.25813	35.1058	3.41253	4.68081	5.10002	8.96194	7.71244	33.7825	38.1353	33.3997	3.10157	3.40013	3.73589	4.54602	4.90923	4.58719
ASHGA5P026988	0.0180837	0.0561913	2.49556	down	noncoding	ENST00000544717	RP11-319E16.1	GENCODE	754	chr12	-	5343162	5349269		GAGAATACTCTTGAGAATATTGTTCTTGGCTGTTCCAAATAGAAAGATCATCTGTCCATT	intergenic							6.56548	24.9597	2.82069	4.14005	5	9.69644	5	27.355	22.0543	25.4697	2.46913	3.497	2.49594	4.20762	4.05063	4.16191
ASHGA5P045375	0.000870229	0.00907787	2.26853	down	noncoding	ENST00000445897	RP11-6F6.1	GENCODE	436	chr9	-	108823634	108827274		CACCCTTAGCAGTATCCAGCTTTTCAATTCTGACTTTACTGAGAGGAATAAAGTAATATT	intergenic							5	18.0454	2.45604	3.6378	5	5	5	16.1399	18.2535	19.7429	2.46913	2.40305	2.49594	3.37907	3.75898	3.77535
ASHGA5P032753	0.000402597	0.00617466	3.59205	down	noncoding	ENST00000425277	AC099684.1	GENCODE	1747	chr17	+	1921176	1924000		TCAGGGATGGCATTAACTTATAAATGAGTGTGTTTGACTGATTTTGTGGTTGATGTACAG	intronic antisense	NM_178568	RTN4RL1	reticulon-4 receptor-like 1 precursor	-	1837970	1928178	5	27.7202	2.45604	4.30085	5	5	5	28.27	31.453	23.4376	2.46913	2.40305	2.49594	4.26222	4.60752	4.03281
ASHGA5P000394	0.00476188	0.02419	2.00591	down	noncoding	chr3:188521875-188539200+	chr3:188521875-188539200	LincRNAs identified by Khalil et al	17325	chr3	+	187039181	187056506		TTTCCTCAATGTGTCTCATTCCCTGAGTGCTGCTCAGAGTTGTAGGCATCCTGAATTACA	intergenic							21.239	75.8142	4.84609	5.85034	19.4576	24.4371	19.8223	80.6954	82.997	63.7502	4.83862	4.71336	4.98628	5.87186	6.11343	5.56574
ASHGA5P032000	0.00142277	0.0117738	2.49087	down	noncoding	BE551409		LincRNAs identified by Khalil et al	469	chr10	+	74008180	74008649		AAACGGGTCTTATTTGAAAATGGTAAAACCTGGCCAGGCCTTGGACTTCCTGCATTGGTT	intergenic							5	19.7327	2.45604	3.77269	5	5	5	19.1184	22.7262	17.3534	2.46913	2.40305	2.49594	3.64174	4.10133	3.57501
ASHGA5P045312	0.00479094	0.0242677	2.12934	down	noncoding	ENST00000429700	RP11-82L18.2	GENCODE	585	chr9	-	91703801	91724849		AGCTCTCAGGTCACTTCTGGCTTCCAACATTCTATAAATGCTCTCAGAAAACAAAAGTCC	intron sense-overlapping	NM_016848	SHC3	SHC-transforming protein 3	-	91620685	91793682	29.9347	102.441	5.20803	6.29844	23.5636	46.4194	19.8212	105.893	85.8552	115.576	5.0897	5.54823	4.98614	6.2771	6.16294	6.45526
ASHGA5P030754	0.0012235	0.0108883	3.27538	down	noncoding	ENST00000558221	CTD-3094K11.1	GENCODE	402	chr15	+	91382953	91384608		CTATCGTCCTTCTAAAAGACACTTCAAAAAGAGGCAAAATCATGCCTTCCATACATATAT	intergenic							5.63627	29.0599	2.67343	4.3851	5	6.9088	5	28.4019	30.4113	28.3665	2.46913	3.05523	2.49594	4.27121	4.55397	4.33011
ASHGA5P015177	0.00348729	0.0198803	3.47544	down	noncoding	ENST00000417565	RP11-475O6.1	GENCODE	471	chr1	-	84297303	84326626		TGGTCCTTGGAATCTTCTTCCCTTCTGGTCTGACTAGGAAAGCCAGAGGGAGATGGTGAA	intergenic							64.3324	310.383	6.18908	7.98627	36.2857	96.6651	60.0465	279.674	294.489	356.984	5.65851	6.47455	6.43417	7.7575	8.04505	8.15627
ASHGA5P017758	0.000105951	0.00339562	2.0706	down	noncoding	ENST00000445429	AC093415.2	GENCODE	532	chr3	-	37847568	37903219		TAGCCACCAGATGCCAAACACTGAGCAGGCTTTGTTCTCCACCCACAAACCAGAGGCTGT	intronic antisense	NM_002207	ITGA9	integrin alpha-9 precursor	+	37493812	37861281	142.863	393.742	7.30931	8.35936	138.637	177.615	112.337	397.978	360.082	423.166	7.42551	7.24789	7.25453	8.30273	8.34826	8.4271
ASHGA5P039364	4.33231e-06	0.00105192	2.09492	down	noncoding	ENST00000507666	RP11-380P13.2	GENCODE	639	chr4	-	23724884	23735202		CACCGAGCTTTCCTTGGTGTCAGCCACAGGGGTCACTAAGCCATCAGCTGATCAAGAAAG	intergenic							5	16.7795	2.45604	3.52294	5	5	5	18.0454	15.4234	16.8698	2.46913	2.40305	2.49594	3.54191	3.49463	3.53227
ASHGA5P007112	0.000249109	0.0048622	2.53	down	noncoding	ENST00000328344	LINC00334	GENCODE	530	chr21	+	46654266	46678645		GTGGCCCGAGGGCTATTTTAAAATATTTTCTGTTTCCTTGATTTCTCCTCCTTTGGATGT	intergenic							160.082	524.632	7.45257	8.79171	127.204	201.337	151.706	528.116	483.575	562.204	7.31318	7.39515	7.64938	8.73015	8.77943	8.86554
ASHGA5P029448	0.00015381	0.00398469	2.24312	down	noncoding	uc021rpq.1	TCRVA13	UCSC_knowngene	256	chr14	+	22539214	22539470		AGCTTATTGTACATTTCCTCTTCCCAGACCACAGACTCAGGCGTTTATTTCTGTGCTGTG	intergenic							85.4925	275.988	6.65254	7.81805	72.7729	104.324	79.3808	282.332	252.827	292.805	6.57687	6.56918	6.81158	7.77306	7.81851	7.86258
ASHGA5P049766	0.0153584	0.0506053	2.39924	down	noncoding	uc002iuo.3	BC037494	UCSC_knowngene	1342	chr17	+	54305682	54307024		ATTTTAGCAGATCTGAACTGGGAGTTCTGAGTTTTGTCTTTGGAATTAGGGTGATTTTTT	intron sense-overlapping	NM_153228	ANKFN1	ankyrin repeat and fibronectin type-III domain-containing protein 1	+	54230835	54560007	5	19.5011	2.45604	3.71862	5	5	5	15.9709	26.4153	16.117	2.46913	2.40305	2.49594	3.36197	4.33575	3.45814
ASHGA5P023328	0.000182897	0.00426269	3.87264	down	noncoding	ENST00000578409	USP32P2	GENCODE	579	chr17	-	18420632	18426609		CATCCCCTCTGTTGTAGATGAGCATGAGAGTGTGGAGCAGAGTTGGCGAGTGCAAGTCGA	intergenic							74.1974	393.525	6.40063	8.35394	55.7735	111.364	55.4544	446.013	356.2	378.361	6.21668	6.65328	6.33192	8.47839	8.33133	8.2521
ASHGA5P031366	0.0026536	0.0169511	4.38077	down	noncoding	ENST00000565700	RP11-517C16.2	GENCODE	2998	chr16	-	84492864	84500967		TCAGTTTTCTGGGAACTCCTGATGGAAAGTGGCTGTATTTGTTCATCCCTATAGCCTTGG	natural antisense	NM_014861	ATP2C2	calcium-transporting ATPase type 2C member 2	+	84402132	84497793	8.79529	71.7927	3.64281	5.77399	5.85551	9.02847	11.5019	75.6072	73.203	66.5679	3.26198	3.40993	4.25651	5.76812	5.91856	5.63529
ASHGA5P048879	6.23469e-05	0.00275924	2.49703	down	noncoding	TCONS_00025084	XLOC_012044	LincRNAs identified by Cabili et al	481	chr16	-	86256068	86256625	TCONS_00024763	TTCATTCTCAGTGAGTTCAAAATACTATTTTGGTTTGTCTCAGTTTCTTCCTCTCTCTCT	intergenic							114.266	385.447	7.00465	8.32486	91.8044	152.314	98.679	390.901	353.149	412.292	6.87139	7.05369	7.08886	8.27023	8.31791	8.38642
ASHGA5P000420	0.00711136	0.0311017	2.08877	down	noncoding	chr4:4855350-4865400+	chr4:4855350-4865400	LincRNAs identified by Khalil et al	10050	chr4	+	4804449	4814499		CTTTTTTCTCTATCCCTGGAGAGCTAGTTAAGTGTATCTGGATAAACCAGGCCATGTTCT	intergenic							5	16.808	2.45604	3.5187	5	5	5	14.2487	20.0155	16.1598	2.46913	2.40305	2.49594	3.19018	3.90288	3.46303
ASHGA5P043012	0.00264488	0.0169511	2.40453	down	noncoding	ENST00000420243	POU6F2-AS2	GENCODE	514	chr7	-	39023842	39053151		TCTTCTTTGATAACATGTCAAGGAGTTACATTTGACATAGCCCTGTTATTTTTACCACAG	intronic antisense	NM_001166018	POU6F2	POU domain, class 6, transcription factor 2 isoform 2	+	39017608	39504390	5	19.1405	2.45604	3.7218	5	5	5	16.5763	22.2524	18.5926	2.46913	2.40305	2.49594	3.41661	4.06498	3.68382
ASHGA5P043012	0.00264488	0.0169511	2.40453	down	noncoding	ENST00000420243	POU6F2-AS2	GENCODE	514	chr7	-	39023842	39053151		TCTTCTTTGATAACATGTCAAGGAGTTACATTTGACATAGCCCTGTTATTTTTACCACAG	intronic antisense	NM_007252	POU6F2	POU domain, class 6, transcription factor 2 isoform 1	+	39017608	39504390	5	19.1405	2.45604	3.7218	5	5	5	16.5763	22.2524	18.5926	2.46913	2.40305	2.49594	3.41661	4.06498	3.68382
ASHGA5P043789	0.0196629	0.0592384	3.26408	down	noncoding	ENST00000416593	AC004012.1	GENCODE	534	chr7	+	95101146	95103310		TTGAGTCTATACGCTTAAGTATTGTGCTATTCCATTTCTTACTGAATACAAAGCAAAAAA	intergenic							8.8163	45.9202	3.37957	5.08624	9.24748	12.2014	5	44.5679	40.5618	52.6308	3.84153	3.80123	2.49594	4.96748	5.00649	5.28476
ASHGA5P023697	0.00334975	0.0193916	2.13238	down	noncoding	HMlincRNA1548-	HMlincRNA1548	LincRNAs identified by Khalil et al	5299	chr15	-	70785696	70790995		TTGTGCTTGCTAATGGAGTTGCCAGTTAGTGTTCTCTCTCCATAACGAGTGTGGAAAAGC	intergenic							138.75	388.308	7.24629	8.33876	96.5885	184.614	135.046	382.193	348.626	434.105	6.9476	7.29157	7.49971	8.24429	8.30029	8.4717
ASHGA5P044980	0.0010841	0.010106	2.43911	down	noncoding	AA164863		LincRNAs identified by Khalil et al	472	chr1	-	201142621	201143091		ATGAAGAACCCCCTTCTATGGAGATTTGTAAGAAGAGTTCTCAGTTGGGCATGGAGAAGG	intergenic							27.1581	112.734	5.16894	6.45529	29.3972	28.2957	23.7816	119.715	111.529	106.959	5.37937	4.90414	5.2233	6.45978	6.55867	6.34744
ASHGA5P052965	0.00579119	0.0273083	2.48564	down	noncoding	ENST00000413182	AC073343.13	GENCODE	548	chr7	+	6703604	6705152		CAAACCCCAGGTGAGTTCCTTTTTTAGATTTTTTCATTTTCCAGGGGATTTGCTGGCTTT	intergenic							5	19.8218	2.45604	3.76966	5	5	5	15.5375	23.6197	20.3083	2.46913	2.40305	2.49594	3.32572	4.16235	3.82091
ASHGA5P038670	0.00577462	0.0272723	4.25904	down	noncoding	uc021wsk.1	EGOT	UCSC_knowngene	353	chr3	+	4792016	4792369		TTTGCTCACCTTCCTGAGCTGGTAGGAACCAGCTTGTTCTCAAATGCGTCAGTAAAGAAT	intron sense-overlapping	NM_001099952	ITPR1	inositol 1,4,5-trisphosphate receptor type 1 isoform 1	+	4535031	4889524	7.53055	53.8617	3.23874	5.32927	5	10.3538	7.23789	56.8577	47.2284	57.4991	2.46913	3.58865	3.65845	5.33597	5.23789	5.41395
ASHGA5P038670	0.00577462	0.0272723	4.25904	down	noncoding	uc021wsk.1	EGOT	UCSC_knowngene	353	chr3	+	4792016	4792369		TTTGCTCACCTTCCTGAGCTGGTAGGAACCAGCTTGTTCTCAAATGCGTCAGTAAAGAAT	intron sense-overlapping	NM_001168272	ITPR1	inositol 1,4,5-trisphosphate receptor type 1 isoform 3	+	4535031	4889524	7.53055	53.8617	3.23874	5.32927	5	10.3538	7.23789	56.8577	47.2284	57.4991	2.46913	3.58865	3.65845	5.33597	5.23789	5.41395
ASHGA5P038670	0.00577462	0.0272723	4.25904	down	noncoding	uc021wsk.1	EGOT	UCSC_knowngene	353	chr3	+	4792016	4792369		TTTGCTCACCTTCCTGAGCTGGTAGGAACCAGCTTGTTCTCAAATGCGTCAGTAAAGAAT	intron sense-overlapping	NM_002222	ITPR1	inositol 1,4,5-trisphosphate receptor type 1 isoform 2	+	4535031	4889524	7.53055	53.8617	3.23874	5.32927	5	10.3538	7.23789	56.8577	47.2284	57.4991	2.46913	3.58865	3.65845	5.33597	5.23789	5.41395
ASHGA5P027465	0.0124628	0.0443917	2.61764	down	noncoding	ENST00000551856	RP11-263K4.4	GENCODE	277	chr12	-	82898989	82899967		GCCTACTGCCTAGCATTCTTGCTAAGATACGTATGTAAATAAAATGTCTTTATATACCTG	intergenic							5.40981	24.8659	2.74567	4.13394	6.22942	5	5	29.4381	23.5915	21.5681	3.33801	2.40305	2.49594	4.3306	4.161	3.91021
ASHGA5P041882	0.023108	0.0661369	2.12063	down	noncoding	TCONS_00020446	XLOC_009779	LincRNAs identified by Cabili et al	1501	chr12	+	58287869	58290670		TCACAGCTTGTTTTTCTCAACCAGCTGCAGACTTAAAGGTGCAGTGTCTTCTTTCTCTCC	intergenic							9.42634	37.3556	3.68988	4.77437	5.33806	13.6278	9.3132	35.8751	41.475	34.7165	3.14774	3.94973	3.97217	4.63213	5.04328	4.64771
ASHGA5P027173	0.000204753	0.00446064	3.00359	down	noncoding	TCONS_00011687	XLOC_005160	LincRNAs identified by Cabili et al	5534	chr6	+	8906331	8931375		GCATCACAAGAATTGTTAATTTATTCTTATATCCTCATTCCTGGTACACAATGGGTGCTC	intergenic							10.1632	57.3077	3.84202	5.42871	8.21507	13.5512	8.72327	54.2664	59.7778	57.8788	3.69204	3.94231	3.8917	5.26563	5.59708	5.4234
ASHGA5P028543	0.038855	0.0942496	2.14075	down	noncoding	ENST00000452288	RP11-165D7.3	GENCODE	413	chr13	-	49144774	49147453		TTTCATTATTTTCCTGAAGAATTACCACTACCCTTTGAGGTGAACCCCTAAGCTGGGATG	intergenic							5.72877	24.9348	3.04633	4.14445	5.35937	5	6.82695	22.7507	24.7692	27.2846	3.15338	2.40305	3.58257	3.91978	4.24021	4.27337
ASHGA5P034632	0.0012723	0.011147	3.04275	down	noncoding	TCONS_00003694	XLOC_001484	LincRNAs identified by Cabili et al	613	chr2	+	57947953	57953284		TTCTAAGAAGCATTTTGGAGGTTTTTCTTTACCTGGAGAAAGCACTGGCTAGAGCTATCT	intergenic							5.44165	26.7673	2.63903	4.2444	5	6.32494	5	26.5218	22.5447	31.2355	2.46913	2.95201	2.49594	4.16046	4.08794	4.48481
ASHGA5P029307	0.000826446	0.00883127	2.04831	down	noncoding	ENST00000553537	RP11-472N19.3	GENCODE	580	chr14	-	92719836	92730000		GGTCCCCTCAAAGAATGTCAGTCCTGAGGGTCTGTAATCCTCTCACTCCCAAAGTAAGAG	intergenic							248.767	629.116	8.02028	9.05472	200.627	323.383	222.291	593.786	576.179	717.382	7.88638	8.03968	8.13479	8.90458	9.04861	9.21096
ASHGA5P047826	0.00183695	0.0136826	2.63823	down	noncoding	ENST00000440887	KCNQ1-AS1	GENCODE	1084	chr11	-	2861364	2882798		ACCACTTATGGAATGATGGACCTTTTCCCCACTGGATTAGAATGTCCTTTTTGTGTATCA	intronic antisense	NM_000218	KCNQ1	potassium voltage-gated channel subfamily KQT member 1	+	2466220	2870340	29.5287	130.046	5.27282	6.67239	23.3549	33.7083	31.5229	128.223	134.453	127.463	5.07895	5.12964	5.60987	6.56484	6.84716	6.60518
ASHGA5P030893	0.00562803	0.0268309	2.01303	down	noncoding	NR_027274	SRRM2-AS1	RefSeq	1371	chr16	-	2787076	2794798		AAACTGGGTTCACACAACAAGCTCGGACTCCTCTTAACACTCCTGATTGGTGACATTATG	intergenic							19.2323	68.0278	4.6776	5.68697	13.3408	24.8136	19.5425	72.1203	62.1701	69.7932	4.33075	4.73548	4.96659	5.69295	5.66063	5.70734
ASHGA5P043340	0.00315389	0.018703	2.89191	down	noncoding	ENST00000444003	AC058791.1	GENCODE	363	chr7	-	130566535	130567582		ACCATTCAGTGCAAGCCAAATTGTGCTAATTTCCAATTTTTCTCCCTTTCTCTTGGTGAG	intergenic							300.69	1007.96	8.21738	9.7494	180.29	447.455	274.325	993.799	893.082	1136.99	7.7545	8.48096	8.41668	9.67752	9.68991	9.88078
ASHGA5P035837	0.00252197	0.0165393	2.72807	down	noncoding	ENST00000455431	RP1-125I3.2	GENCODE	849	chr1	+	26186103	26189911		TCTTACAGTATTTCCCGGGCTTAGGAATTTGTTCGTGTCATCGCTGAATCTTCGCGATCA	natural antisense	NM_178422	PAQR7	membrane progestin receptor alpha	-	26187974	26197744	5.6483	24.5807	2.67561	4.12349	5	6.94489	5	24.6171	25.9516	23.1733	2.46913	3.06176	2.49594	4.04091	4.31043	4.01912
ASHGA5P048454	0.0424434	0.100237	2.71308	down	noncoding	ENST00000544925	RP11-64D24.2	GENCODE	393	chr11	-	114081337	114227293		ATTTTGCTCTTGCTCTGGGAAGTTTACCAAGATTCTAAACTAGCCCCGGCAAACAGGGAA	intronic antisense	NM_001018011	ZBTB16	zinc finger and BTB domain-containing protein 16	+	113931287	114121397	10.6097	50.922	3.80621	5.24615	17.7002	7.42906	6.69985	51.1861	56.3249	45.2551	4.7182	3.14168	3.55875	5.17945	5.5023	5.05669
ASHGA5P048454	0.0424434	0.100237	2.71308	down	noncoding	ENST00000544925	RP11-64D24.2	GENCODE	393	chr11	-	114081337	114227293		ATTTTGCTCTTGCTCTGGGAAGTTTACCAAGATTCTAAACTAGCCCCGGCAAACAGGGAA	intronic antisense	NM_006006	ZBTB16	zinc finger and BTB domain-containing protein 16	+	113930430	114121397	10.6097	50.922	3.80621	5.24615	17.7002	7.42906	6.69985	51.1861	56.3249	45.2551	4.7182	3.14168	3.55875	5.17945	5.5023	5.05669
ASHGA5P048454	0.0424434	0.100237	2.71308	down	noncoding	ENST00000544925	RP11-64D24.2	GENCODE	393	chr11	-	114081337	114227293		ATTTTGCTCTTGCTCTGGGAAGTTTACCAAGATTCTAAACTAGCCCCGGCAAACAGGGAA	intronic antisense	NM_006169	NNMT	nicotinamide N-methyltransferase	+	114166534	114183238	10.6097	50.922	3.80621	5.24615	17.7002	7.42906	6.69985	51.1861	56.3249	45.2551	4.7182	3.14168	3.55875	5.17945	5.5023	5.05669
ASHGA5P021913	0.000359197	0.00585114	2.66012	down	noncoding	ENST00000544306	AC062028.1	GENCODE	1139	chr2	-	11245442	11272347		GACTTGCCAGGTTTTGTTCAGGTTTAGCACAAGCTGTGATGAATATCTTCAAGCCTCTGC	bidirectional	NM_182500	C2orf50	uncharacterized protein C2orf50	+	11273178	11286916	5	20.8834	2.45604	3.86754	5	5	5	21.3953	22.6883	18.5665	2.46913	2.40305	2.49594	3.82222	4.0991	3.68129
ASHGA5P035208	4.2292e-05	0.00235282	3.27156	down	noncoding	TCONS_00004371	XLOC_002256	LincRNAs identified by Cabili et al	468	chr2	-	108683754	108684693		TTAATGGCCGTGGACAGCAACCTCATGATGACATCGCTCCAGCATTTCTTTGTGAAATGT	intergenic							8.59862	54.0312	3.62927	5.33925	8.64831	10.8579	6.28967	54.4977	51.3586	56.2372	3.75873	3.65133	3.47775	5.27243	5.36583	5.37948
ASHGA5P042162	0.000268023	0.00506569	3.0765	down	noncoding	NR_024277	AGPAT4-IT1	RefSeq	1869	chr6	-	161581163	161583014		TTTTCCTCTCAGCATCAGAGAAGGCAGAAAGCAAGAGAAAGGAATGCAATGTGAGCAAGG	intron sense-overlapping	NM_020133	AGPAT4	1-acyl-sn-glycerol-3-phosphate acyltransferase delta	-	161551056	161695107	386.608	1419.91	8.60425	10.2255	351.684	517.086	291.054	1308.98	1236.15	1714.6	8.6456	8.66471	8.50245	10.0666	10.1404	10.4696
ASHGA5P057886	0.00921981	0.0367504	2.1703	down	noncoding	TCONS_00023307	XLOC_011177	LincRNAs identified by Cabili et al	1126	chr15	+	24591800	24603338	NR_026646, uc001ywm.3	ATCATATTTCTGCATTCAGGATCATGTTTTCTTGGCTCCATCAGGAACTGTGCAGGACTG	intergenic							19.2187	73.084	4.67778	5.79567	13.443	24.8069	19.4063	74.4085	81.5016	63.342	4.34108	4.73489	4.95736	5.74179	6.0857	5.55952
ASHGA5P048114	0.000406455	0.0061956	2.49415	down	noncoding	TCONS_00014011	XLOC_006658	LincRNAs identified by Cabili et al	818	chr7	-	153220299	153221300		CTGTCTCCATACTTTTACCTATGCCTGCTCCTAAGCATCAGAATACTAAGTAATTAATAA	intergenic							44.4489	173.597	5.78877	7.10732	44.5865	56.0951	32.6652	201.534	158.406	160.851	5.92767	5.78545	5.65318	7.26956	7.10069	6.9517
ASHGA5P040378	0.013671	0.0470283	2.59925	down	noncoding	ENST00000509629	RP11-5N11.6	GENCODE	435	chr5	-	31747750	31748185		GAAAAAACAATCACATACCTTGGGAATCCCAACTCTCATGCTCCGTCAACAGGTCTATGG	intronic antisense	ENST00000438447	PDZD2	PDZ domain containing 2 [Source:HGNC Symbol;Acc:18486]	+	31639516	32111037	12.2553	56.3481	4.01934	5.39744	6.41981	17.5325	12.8135	58.3729	50.0016	60.6697	3.37548	4.27558	4.40697	5.37538	5.32457	5.49236
ASHGA5P040378	0.013671	0.0470283	2.59925	down	noncoding	ENST00000509629	RP11-5N11.6	GENCODE	435	chr5	-	31747750	31748185		GAAAAAACAATCACATACCTTGGGAATCCCAACTCTCATGCTCCGTCAACAGGTCTATGG	intronic antisense	ENST00000513910	PDZD2	PDZ domain containing 2 [Source:HGNC Symbol;Acc:18486]	+	31712145	31799396	12.2553	56.3481	4.01934	5.39744	6.41981	17.5325	12.8135	58.3729	50.0016	60.6697	3.37548	4.27558	4.40697	5.37538	5.32457	5.49236
ASHGA5P037383	3.50267e-05	0.00211704	3.17556	down	noncoding	ENST00000481582	ABCC13	GENCODE	4080	chr21	+	15646200	15672006		CCCTACTTACGTTCTGGTTGTCATGTTTCCCTGTATTTGATAAAACACATAATTTTGAGA	intergenic							22.7198	121.269	4.89773	6.56474	18.8879	31.0236	18.2481	121.531	118.434	123.842	4.80072	5.0246	4.86788	6.48377	6.65201	6.55844
ASHGA5P035627	0.0395371	0.0954221	2.13124	down	noncoding	ENST00000244820	AC105760.3	GENCODE	2231	chr2	-	237957241	237964810		TTATATAAGAAGAACCAGTTTTCCCACTTCATGATTTTGCAGCTTAATGGGATGGATATG	intergenic							12.105	46.1292	3.98509	5.07678	13.0998	17.3938	5.82137	53.6421	49.3747	35.3707	4.30623	4.26786	3.38118	5.24841	5.3049	4.67704
ASHGA5P020188	0.000882594	0.00912418	2.11537	down	noncoding	ENST00000509252	CTC-338M12.3	GENCODE	529	chr5	+	180688224	180691258		AGCAAGGACTGCCATCCTGCAGCCACCAGAACCTTCCACATGAAATGAAAGGCTCACCAC	bidirectional	NM_032765	TRIM52	tripartite motif-containing protein 52	-	180683385	180688119	229.634	607.54	7.93889	9.0198	236.531	255.067	197.304	609.849	588.269	624.501	8.10961	7.72116	7.9859	8.94768	9.08771	9.02401
ASHGA5P036653	0.0397706	0.0958317	2.21082	down	noncoding	ENST00000569833	RP11-268G13.1	GENCODE	2180	chr20	-	11665791	11667971		AGGATGAAGATAGGCATTCATCGAAAAACTGTTTTTGTGTTTCTTCCAGTACTGCTACTT	intergenic							7.82635	28.9199	3.23369	4.37827	6.99772	11.4813	5	28.9466	29.4678	28.3454	3.47817	3.72696	2.49594	4.30321	4.50251	4.3291
ASHGA5P047786	4.37987e-06	0.00105192	3.34599	down	noncoding	uc001llv.1	AK125849	UCSC_knowngene	5254	chr10	+	134779037	134789858	ENST00000461291	TTGCCTCAGCTGAGACAAAGTCTCAGCAAATCATCAGTGTTCCTCTTCTGTGAGGTCTTT	intergenic							10.9939	68.6962	3.96408	5.70651	9.90777	13.3461	9.72788	69.2619	66.3956	70.4311	3.93906	3.92149	4.03168	5.63478	5.76335	5.7214
ASHGA5P046928	0.00336795	0.0194623	2.32864	down	noncoding	TCONS_00015035	XLOC_007116	LincRNAs identified by Cabili et al	1067	chr8	-	69967581	69980750		CACATAGCTTTGCTTCCATACCTAAATTACTACAAATTTGTGTCCGCTTGAATGTTATGT	intergenic							5	18.5904	2.45604	3.67553	5	5	5	15.2175	18.7127	21.8409	2.46913	2.40305	2.49594	3.29568	3.80058	3.93032
ASHGA5P015412	0.00197785	0.0143416	2.61343	down	noncoding	ENST00000420070	RP11-216C10.1	GENCODE	795	chr20	-	22528308	22541562		AATGCAGCAGCCACACGTATTTTCCTGTCATGAAGATTTTCTTTAATAAAGCTGCAAGTT	intergenic							5.30349	22.9138	2.61456	4.00051	5	5.91046	5	27.3816	22.1421	19.2178	2.46913	2.87862	2.49594	4.20961	4.05741	3.73451
ASHGA5P018563	0.00225983	0.015507	2.71218	down	noncoding	ENST00000455081	AC013472.3	GENCODE	558	chr2	-	27207645	27237456		TGTGGGTTCAGATCCCCTGGAAAGTGAGAGCCGTTTCTTCACTAGATACTTTCCCTCCAG	intronic antisense	NM_012326	MAPRE3	microtubule-associated protein RP/EB family member 3	+	27193524	27250087	13.6873	65.719	4.19376	5.63322	14.0334	18.8737	8.15473	72.2456	64.3072	60.6043	4.40055	4.37592	3.80482	5.696	5.71305	5.4906
ASHGA5P057953	0.00215514	0.0150722	2.04963	down	noncoding	TCONS_00024377	XLOC_011701	LincRNAs identified by Cabili et al	745	chr16	+	34685256	34686664		TGGAGACCAAATAAGGCTTGAAAGCATACTTTTGATCATCGTCCCTGTCGTCACAATGGG	intergenic							14.6181	53.4403	4.27964	5.31501	11.2237	21.626	11.0045	57.5541	46.1655	56.6012	4.10223	4.5468	4.18989	5.35203	5.20397	5.38902
ASHGA5P043160	0.000261334	0.0049968	2.62425	down	noncoding	ENST00000479299	DTX2	GENCODE	453	chr7	-	76103903	76108173	ENST00000434531	CAACATTTAGTAACCAACATCAAATGTACTTGTCTCTCCTAAGCTGCACAGACTGCCAAG	intronic antisense	NM_001102594	DTX2	probable E3 ubiquitin-protein ligase DTX2 isoform a	+	76090971	76135312	22.883	102.765	4.92391	6.31581	24.6135	26.8764	17.159	107.068	95.7409	105.485	5.14943	4.83805	4.78424	6.2943	6.32468	6.32844
ASHGA5P043160	0.000261334	0.0049968	2.62425	down	noncoding	ENST00000479299	DTX2	GENCODE	453	chr7	-	76103903	76108173	ENST00000434531	CAACATTTAGTAACCAACATCAAATGTACTTGTCTCTCCTAAGCTGCACAGACTGCCAAG	intronic antisense	NM_001102595	DTX2	probable E3 ubiquitin-protein ligase DTX2 isoform a	+	76090971	76135312	22.883	102.765	4.92391	6.31581	24.6135	26.8764	17.159	107.068	95.7409	105.485	5.14943	4.83805	4.78424	6.2943	6.32468	6.32844
ASHGA5P043160	0.000261334	0.0049968	2.62425	down	noncoding	ENST00000479299	DTX2	GENCODE	453	chr7	-	76103903	76108173	ENST00000434531	CAACATTTAGTAACCAACATCAAATGTACTTGTCTCTCCTAAGCTGCACAGACTGCCAAG	intronic antisense	NM_020892	DTX2	probable E3 ubiquitin-protein ligase DTX2 isoform a	+	76090971	76135312	22.883	102.765	4.92391	6.31581	24.6135	26.8764	17.159	107.068	95.7409	105.485	5.14943	4.83805	4.78424	6.2943	6.32468	6.32844
ASHGA5P019490	0.0335864	0.0848557	2.11558	down	noncoding	ENST00000487814	ZBTB20-AS1	GENCODE	690	chr3	+	114106515	114107825		GTATATACAAGTCTCTACTTCTCCTACATAAATGCCTTGCATGGCGGGAACTAAATCAAC	intronic antisense	NM_001164343	ZBTB20	zinc finger and BTB domain-containing protein 20 isoform 2	-	114056946	114790261	17.6349	62.0144	4.44904	5.5301	9.43441	29.4023	14.0679	76.0576	51.6099	58.3758	3.86787	4.9543	4.52495	5.77945	5.37354	5.4373
ASHGA5P019490	0.0335864	0.0848557	2.11558	down	noncoding	ENST00000487814	ZBTB20-AS1	GENCODE	690	chr3	+	114106515	114107825		GTATATACAAGTCTCTACTTCTCCTACATAAATGCCTTGCATGGCGGGAACTAAATCAAC	intronic antisense	NM_001164344	ZBTB20	zinc finger and BTB domain-containing protein 20 isoform 2	-	114056946	114478124	17.6349	62.0144	4.44904	5.5301	9.43441	29.4023	14.0679	76.0576	51.6099	58.3758	3.86787	4.9543	4.52495	5.77945	5.37354	5.4373
ASHGA5P019490	0.0335864	0.0848557	2.11558	down	noncoding	ENST00000487814	ZBTB20-AS1	GENCODE	690	chr3	+	114106515	114107825		GTATATACAAGTCTCTACTTCTCCTACATAAATGCCTTGCATGGCGGGAACTAAATCAAC	intronic antisense	NM_001164345	ZBTB20	zinc finger and BTB domain-containing protein 20 isoform 2	-	114056946	114478124	17.6349	62.0144	4.44904	5.5301	9.43441	29.4023	14.0679	76.0576	51.6099	58.3758	3.86787	4.9543	4.52495	5.77945	5.37354	5.4373
ASHGA5P019490	0.0335864	0.0848557	2.11558	down	noncoding	ENST00000487814	ZBTB20-AS1	GENCODE	690	chr3	+	114106515	114107825		GTATATACAAGTCTCTACTTCTCCTACATAAATGCCTTGCATGGCGGGAACTAAATCAAC	intronic antisense	NM_001164346	ZBTB20	zinc finger and BTB domain-containing protein 20 isoform 2	-	114056946	114343792	17.6349	62.0144	4.44904	5.5301	9.43441	29.4023	14.0679	76.0576	51.6099	58.3758	3.86787	4.9543	4.52495	5.77945	5.37354	5.4373
ASHGA5P019490	0.0335864	0.0848557	2.11558	down	noncoding	ENST00000487814	ZBTB20-AS1	GENCODE	690	chr3	+	114106515	114107825		GTATATACAAGTCTCTACTTCTCCTACATAAATGCCTTGCATGGCGGGAACTAAATCAAC	intronic antisense	NM_001164347	ZBTB20	zinc finger and BTB domain-containing protein 20 isoform 2	-	114056946	114343053	17.6349	62.0144	4.44904	5.5301	9.43441	29.4023	14.0679	76.0576	51.6099	58.3758	3.86787	4.9543	4.52495	5.77945	5.37354	5.4373
ASHGA5P019490	0.0335864	0.0848557	2.11558	down	noncoding	ENST00000487814	ZBTB20-AS1	GENCODE	690	chr3	+	114106515	114107825		GTATATACAAGTCTCTACTTCTCCTACATAAATGCCTTGCATGGCGGGAACTAAATCAAC	intronic antisense	NM_015642	ZBTB20	zinc finger and BTB domain-containing protein 20 isoform 2	-	114056946	114866127	17.6349	62.0144	4.44904	5.5301	9.43441	29.4023	14.0679	76.0576	51.6099	58.3758	3.86787	4.9543	4.52495	5.77945	5.37354	5.4373
ASHGA5P019437	0.00277555	0.0173474	3.02168	down	noncoding	NR_033905	DHX35	RefSeq	3356	chr20	+	37590980	37668366		CTGCTGTTACACATGATCTTTCTTCCCAAAGGTTGCAGGGAGAGTAGCTGAAGAAAGGGG	exon sense-overlapping	NM_001190809	DHX35	probable ATP-dependent RNA helicase DHX35 isoform 2	+	37590980	37668366	11.5995	65.8476	4.04046	5.63581	13.5345	10.2406	11.0233	66.806	59.1259	71.611	4.35196	3.57685	4.19258	5.58043	5.57998	5.74702
ASHGA5P019437	0.00277555	0.0173474	3.02168	down	noncoding	NR_033905	DHX35	RefSeq	3356	chr20	+	37590980	37668366		CTGCTGTTACACATGATCTTTCTTCCCAAAGGTTGCAGGGAGAGTAGCTGAAGAAAGGGG	exon sense-overlapping	NM_021931	DHX35	probable ATP-dependent RNA helicase DHX35 isoform 1	+	37590980	37668366	11.5995	65.8476	4.04046	5.63581	13.5345	10.2406	11.0233	66.806	59.1259	71.611	4.35196	3.57685	4.19258	5.58043	5.57998	5.74702
ASHGA5P045621	0.000935391	0.00939877	2.33473	down	noncoding	ENST00000428006	RP11-536O18.1	GENCODE	477	chr9	+	13446524	13487510		ATCTCTGTCTCCAACCCACAAACCACATGCATCATAAATAAATTAAAATACCAAAACTTT	intergenic							181.835	546.432	7.63344	8.8567	184.044	201.801	159.661	528.513	556.006	554.776	7.78012	7.39946	7.72075	8.7323	8.98909	8.8487
ASHGA5P030318	0.00466192	0.023872	2.35861	down	noncoding	TCONS_00008651	XLOC_004167	LincRNAs identified by Cabili et al	3495	chr4	-	174615437	174620132		AAATAAACCTGCATGCATGCAGATCACACACCTGGATTCCATTATCTCTCTGACTTCCAG	intergenic							11.4224	50.994	4.00829	5.24623	8.63605	13.5226	12.1085	46.4222	56.0859	50.4739	3.75648	3.93906	4.32933	5.02675	5.49529	5.21665
ASHGA5P019504	0.00722728	0.0314065	2.59617	down	noncoding	ENST00000488578	RP4-565E6.1	GENCODE	669	chr1	-	146093233	146130539		ATGGAATCCATCATGTTGCTGATGTCACTACTCTCAACTCCTGATGGCATCAGAACACAG	intron sense-overlapping	ENST00000436832	WI2-3658N16.1	Neuroblastoma breakpoint family member 12 [Source:UniProtKB/TrEMBL;Acc:E7EP91]	-	146032647	146215986	5.98456	24.5529	2.7318	4.10818	5	7.95369	5	28.7433	20.1281	24.7873	2.46913	3.23032	2.49594	4.29264	3.91253	4.11938
ASHGA5P031396	0.0014246	0.0117784	2.97536	down	noncoding	ENST00000563243	RP11-21B21.4	GENCODE	733	chr16	-	88579367	88597461		AAACTGGATCTGACCCTGGAATTGGTTCCTGCGGCTCTTCCAGAGCAGCAGACAAGCGTC	intronic antisense	NM_153813	ZFPM1	zinc finger protein ZFPM1	+	88520013	88601574	5.58054	26.5775	2.66351	4.23658	5	6.7416	5	28.6854	22.2963	28.7509	2.46913	3.02547	2.49594	4.28876	4.0688	4.35217
ASHGA5P041937	0.00014753	0.00393694	6.28055	down	noncoding	ENST00000429137	RP11-459O1.2	GENCODE	305	chr6	-	89008668	89130752		GTCTATAGCTGGTGATCATCTTGTATACCTAATTCTGGCTTCATCTTCAGACTCGGACAG	intergenic							5.58246	53.3431	2.66394	5.31483	5	6.74739	5	55.6497	47.13	57.2495	2.46913	3.02674	2.49594	5.30371	5.23495	5.40582
ASHGA5P047026	0.0250687	0.0696868	2.05626	down	noncoding	AL137472		LincRNAs identified by Khalil et al	2679	chr1	-	228261610	228264251		ATCTGACATGGTTACTAGTTGTGTGATTTCTGTCTGCCTTTGCAGTGGACACACCACAGA	intergenic							11.0388	41.9034	3.91252	4.95254	6.38205	14.6515	12.0828	43.3431	43.6278	38.7394	3.3672	4.04333	4.32702	4.92156	5.11695	4.8191
ASHGA5P055971	0.00264891	0.0169511	2.07045	down	noncoding	TCONS_00025721	XLOC_012542	LincRNAs identified by Cabili et al	420	chr17	-	59470732	59475416		AACGTTTCCACGGCTTTTCCATTAAACTTTACCCCAAATCACACCTGGCTCTGTGGGTTT	intergenic							21.5311	77.3338	4.83664	5.88658	24.3784	24.6518	15.5631	76.9667	72.5912	82.4435	5.13584	4.72549	4.64858	5.80126	5.90454	5.95396
ASHGA5P041839	0.000840443	0.00889169	2.70543	down	noncoding	ENST00000562471	RP11-7K24.3	GENCODE	2022	chr6	-	42059975	42061997		GAACCCAGTCACTTTGCTGTTTTTCTGCCCACAAGTTTCTCTAATAAATCTTATTCTATG	intergenic							46.8563	194.25	5.85194	7.2878	35.8055	60.4766	44.2868	199.047	203.931	179.773	5.63871	5.88014	6.03697	7.24869	7.49391	7.12079
ASHGA5P031773	0.00239118	0.0160781	2.22837	down	noncoding	ENST00000565153	RP11-297L17.2	GENCODE	557	chr16	+	52641260	52647806		GTGTTTGAGTGCTCTTAAGGGGATTGTCTAATATCTTGGCTCCTGACTCATCCTTAGAAG	intergenic							25.6722	98.7789	5.10445	6.26044	25.3256	26.142	25.5491	96.8265	99.7465	99.7638	5.18631	4.80497	5.32207	6.15136	6.38504	6.24492
ASHGA5P048201	0.0206826	0.0614177	2.10157	down	noncoding	DB338868		LincRNAs identified by Khalil et al	537	chr3	+	65012616	65013151		ATACCAAGTCAGGAGTCTCAGTCTTAAAAGACAGCACCCACTCCCAATACAGGAAAACAG	intergenic							667.071	1659.53	9.36572	10.4372	724.529	659.284	617.4	1699.63	1988.28	1290.67	9.60448	8.9975	9.4952	10.4337	10.8207	10.0572
ASHGA5P030729	0.000138504	0.00380431	2.13481	down	noncoding	ENST00000569473	RP11-217B1.2	GENCODE	1109	chr15	+	89878283	89879392		ACTTTTAGTTTATTCCTCCCTCAGGAACGAAGTATTGGGACAATGTGAACGTAGTCGCCG	bidirectional	NM_001126131	POLG	DNA polymerase subunit gamma-1	-	89859535	89878026	93.4662	282.724	6.76222	7.85632	79.6524	116.896	83.8504	282.479	260.626	305.069	6.68625	6.71741	6.88298	7.77356	7.86284	7.93257
ASHGA5P030729	0.000138504	0.00380431	2.13481	down	noncoding	ENST00000569473	RP11-217B1.2	GENCODE	1109	chr15	+	89878283	89879392		ACTTTTAGTTTATTCCTCCCTCAGGAACGAAGTATTGGGACAATGTGAACGTAGTCGCCG	bidirectional	NM_002693	POLG	DNA polymerase subunit gamma-1	-	89859535	89878026	93.4662	282.724	6.76222	7.85632	79.6524	116.896	83.8504	282.479	260.626	305.069	6.68625	6.71741	6.88298	7.77356	7.86284	7.93257
ASHGA5P021356	0.00464021	0.0238104	2.11991	down	noncoding	ENST00000530792	CTD-2562J17.4	GENCODE	495	chr11	-	74919098	74952218		GAAATCCTCATGAAGATCCAGCACCTTCCAGTTAGCCCATCTATGAGAAAACCAATGCTC	natural antisense	NM_001195528	TPBGL	uncharacterized protein LOC100507050 precursor	+	74951949	74954749	22.0612	78.7457	4.81978	5.90378	15.199	32.9682	18.0164	85.1397	65.6451	85.4524	4.50782	5.10131	4.85021	5.95773	5.74629	6.00732
ASHGA5P027556	0.00568994	0.0270083	3.20618	down	noncoding	ENST00000548473	RP11-128P10.1	GENCODE	507	chr12	-	108003810	108011498		TTTCATGTAAATTGCCTGTTCCTAGGCTCCAATTAAAATGATGGCCTCCGGATGTCTCTT	natural antisense	NM_001017523	BTBD11	ankyrin repeat and BTB/POZ domain-containing protein BTBD11 isoform b	+	107974633	108053419	5.44553	29.9938	2.75293	4.43379	6.33659	5	5	29.4012	28.0526	32.5277	3.35979	2.40305	2.49594	4.32785	4.42497	4.54854
ASHGA5P027556	0.00568994	0.0270083	3.20618	down	noncoding	ENST00000548473	RP11-128P10.1	GENCODE	507	chr12	-	108003810	108011498		TTTCATGTAAATTGCCTGTTCCTAGGCTCCAATTAAAATGATGGCCTCCGGATGTCTCTT	natural antisense	NM_001018072	BTBD11	ankyrin repeat and BTB/POZ domain-containing protein BTBD11 isoform a	+	107712196	108053419	5.44553	29.9938	2.75293	4.43379	6.33659	5	5	29.4012	28.0526	32.5277	3.35979	2.40305	2.49594	4.32785	4.42497	4.54854
ASHGA5P048405	0.0233751	0.0665628	2.56879	down	noncoding	TCONS_00014415	XLOC_006582	LincRNAs identified by Cabili et al	856	chr7	-	119856571	119867438		GACTCCAGAAAAGAAATGGTTTTAGTTTTCTCCAATCATAACCTTTTACCATGTTGGTGA	intergenic							6.78844	26.065	2.8519	4.21299	5	10.3653	5	25.3845	27.5889	25.2216	2.46913	3.59064	2.49594	4.09445	4.39892	4.14561
ASHGA5P058330	0.0363921	0.0897987	2.07667	down	noncoding	uc001ejr.4	LOC100286793	UCSC_knowngene	1281	chr1	-	143717587	143744587	ENST00000442423, NR_027468, uc001eqn.3, uc009wjz.1	CTGTTTGCAGATACTGTACAGGACAACCTGCTTTTCATATTCTCTGTGAATTTCAAAGAC	intergenic							12.8913	44.3301	3.98607	5.04034	7.66037	23.498	7.51538	46.6426	43.8599	42.4878	3.5968	4.65821	3.7032	5.03438	5.12319	4.96345
ASHGA5P022891	0.000250938	0.00487855	3.12812	down	noncoding	ENST00000564893	CTD-2049O4.1	GENCODE	528	chr16	-	27690260	27730104		CCACATTTTGGTTCATCATGGTTCAGAAAAGTTTGTCTTCTCTTGGCACACCCAGCTTTG	intronic antisense	NM_015202	KIAA0556	uncharacterized protein KIAA0556	+	27561467	27791692	18.901	101.171	4.64741	6.29271	14.1332	26.0369	16.533	105.702	100.953	96.8576	4.41034	4.80034	4.73155	6.27413	6.4024	6.20159
ASHGA5P021482	0.000201135	0.00442675	2.16463	down	noncoding	ENST00000533203	RP11-514F3.5	GENCODE	151	chr11	+	36408070	36409800		CTTGCTCTAAGAAAAGAAATTGGTTCTTCCTTTCATCTACTTTTCCTGCCAGTGTTTATT	intron sense-overlapping	NM_001160167	PRR5L	proline-rich protein 5-like isoform a	+	36317724	36486754	52.8473	176.26	6.02484	7.13896	47.7062	65.1824	45.6532	182.721	178.602	167.458	6.01866	5.97909	6.07677	7.11092	7.29075	7.01521
ASHGA5P021482	0.000201135	0.00442675	2.16463	down	noncoding	ENST00000533203	RP11-514F3.5	GENCODE	151	chr11	+	36408070	36409800		CTTGCTCTAAGAAAAGAAATTGGTTCTTCCTTTCATCTACTTTTCCTGCCAGTGTTTATT	intron sense-overlapping	NM_001160168	PRR5L	proline-rich protein 5-like isoform b	+	36397534	36486754	52.8473	176.26	6.02484	7.13896	47.7062	65.1824	45.6532	182.721	178.602	167.458	6.01866	5.97909	6.07677	7.11092	7.29075	7.01521
ASHGA5P021482	0.000201135	0.00442675	2.16463	down	noncoding	ENST00000533203	RP11-514F3.5	GENCODE	151	chr11	+	36408070	36409800		CTTGCTCTAAGAAAAGAAATTGGTTCTTCCTTTCATCTACTTTTCCTGCCAGTGTTTATT	intron sense-overlapping	NM_024841	PRR5L	proline-rich protein 5-like isoform a	+	36397534	36486754	52.8473	176.26	6.02484	7.13896	47.7062	65.1824	45.6532	182.721	178.602	167.458	6.01866	5.97909	6.07677	7.11092	7.29075	7.01521
ASHGA5P055876	0.0126733	0.0448014	2.37312	down	noncoding	ENST00000548475	AL589743.1	GENCODE	640	chr14	+	19650060	19691701	ENST00000413768, ENST00000432001, ENST00000447898, ENST00000549813, uc001vvl.4, uc001vvr.1, uc002zks.4, uc010ahe.1	ATACTGGTGCTTTTGGGTAGAAACCCTCATCCATATCCTGGTAAGGCTTGAAGTTGCACA	intergenic							10.152	44.9586	3.81501	5.0618	6.09485	12.4371	11.9239	47.4727	43.7312	43.6719	3.30846	3.83018	4.30639	5.06123	5.12038	5.00379
ASHGA5P057854	0.0144112	0.0486618	2.95289	down	noncoding	TCONS_00022695	XLOC_010985	LincRNAs identified by Cabili et al	481	chr14	-	29530332	29533749		AGCTTCACCAGAGCACGAAGAAGAGAAAACAGAAAACATCCATTGAATCCTCTGCCTCTG	intergenic							6.65882	35.0264	3.10659	4.66871	5	7.61036	7.36611	35.8773	38.6474	30.5545	2.46913	3.17294	3.67769	4.63223	4.92836	4.44554
ASHGA5P000213	4.3842e-05	0.00237204	2.78358	down	noncoding	chr11:39334375-39350600-	chr11:39334375-39350600	LincRNAs identified by Khalil et al	16225	chr11	-	39377799	39394024		AACAAATCCTACTGCTTTCATCCTCCTACGTCATCGCAGTTTGCTTCACTCTATCGCATA	intergenic							55.3083	230.518	6.06615	7.54309	50.339	72.8362	42.7496	248.617	223.311	219.627	6.08408	6.12144	5.99292	7.57894	7.63704	7.41329
ASHGA5P032906	0.0141016	0.0479485	2.10078	down	noncoding	ENST00000584962	KRT16P1	GENCODE	1958	chr17	+	18343218	18346206	NR_029392, NR_029393	AGAAACTAGCCCTAGAATAGTGGGCTAGCATTTCTCTATATTGTCTGGCCCATCAGTACC	intergenic							5.68523	22.534	2.89693	3.96786	5.83805	6.21765	5	27.2401	18.1112	22.2505	3.2583	2.93655	2.49594	4.20172	3.74624	3.95561
ASHGA5P021007	1.31207e-05	0.00149364	3.42288	down	noncoding	ENST00000523265	RP11-573J24.1	GENCODE	730	chr8	+	64498557	64501966		ACAATGCTATGAATACATGGTTTCAGGCCTCATGTTTAAGTCTCTGGTAGTTCTTTATAG	intergenic							5	26.3456	2.45604	4.23125	5	5	5	28.2033	26.1931	24.6406	2.46913	2.40305	2.49594	4.25841	4.32356	4.11179
ASHGA5P044880	0.0263909	0.0721262	2.60193	down	noncoding	ENST00000518355	RP11-434I12.3	GENCODE	599	chr8	+	74271147	74275023		AAGTCTCTGCAGGAAGTAGAGTTATTTTCTCAGCACCACATCTGAGCGCATCTTCTAAGG	intergenic							7.80814	33.9752	3.2485	4.62808	7.92336	10.501	5	30.933	37.6465	33.346	3.64465	3.60491	2.49594	4.41046	4.88843	4.58535
ASHGA5P036086	5.17273e-05	0.00252158	2.13587	down	noncoding	uc002tji.1	AK123617	UCSC_knowngene	3471	chr2	+	113963502	113966973		CTAATTTATGGCATGCATATCATATGAGCAGTCTCAAATCCTCCCCAGAACAAGGTGAGG	intergenic							335.037	862.24	8.43633	9.53115	305.845	406.709	292.557	857.229	821.853	907.638	8.45045	8.3508	8.50772	9.45498	9.57157	9.5669
ASHGA5P033737	0.0134942	0.0466318	3.34634	down	noncoding	TCONS_00028366	XLOC_013721	LincRNAs identified by Cabili et al	459	chr20	-	30863238	30865358		TCAACCTTTCTAAAAGCTTTCACATCCATTATCTGACTGGTGTCTCAAACTGCTACTGAG	intergenic							6.99046	33.7914	2.87677	4.61935	5	10.9714	5	30.3003	34.6852	36.3886	2.46913	3.66524	2.49594	4.37409	4.76101	4.72296
ASHGA5P023005	0.00183017	0.013658	2.26928	down	noncoding	ENST00000567503	RP11-744I24.2	GENCODE	474	chr7	-	141229002	141251104		TGTTTGCCTGTAACTACAAAGCAGTTTTCAGATTACTCCATTTGATTCTCACAAGAACAT	natural antisense	NM_018238	AGK	acylglycerol kinase, mitochondrial precursor	+	141251077	141354209	5.23251	19.8165	2.59971	3.78194	5	5.69753	5	18.272	19.8631	21.3143	2.46913	2.83405	2.49594	3.56174	3.89095	3.89315
ASHGA5P037282	0.0184004	0.0568704	4.87338	down	noncoding	TCONS_00025268	XLOC_012073	LincRNAs identified by Cabili et al	447	chr17	+	1243627	1244183		CTGAGGTAACTTGACAACCCATAATCGCTGTTCTCCATGTAAACTGTGGCTCTATTTGTC	intergenic							10.4152	74.7148	3.55379	5.83871	15.618	10.6276	5	78.7395	73.6943	71.7106	4.54387	3.62155	2.49594	5.83768	5.92961	5.74884
ASHGA5P044177	0.0263842	0.0721186	3.02984	down	noncoding	ENST00000519364	RP11-561E1.1	GENCODE	902	chr8	-	24347824	24372341		CTGAAGATCTGATTTTACCTTTTGCTCAAGCTGTCCATTATTTCAGGCTGACTTTTATTT	natural antisense	NM_003817	ADAM7	disintegrin and metalloproteinase domain-containing protein 7 preproprotein	+	24298508	24367077	7.22446	36.6445	3.14631	4.74556	10.5401	6.13325	5	33.919	34.8965	41.1179	4.01912	2.92387	2.49594	4.55343	4.77099	4.91225
ASHGA5P049702	0.000119664	0.00354781	2.22799	down	noncoding	ENST00000300525	C17orf69	GENCODE	1197	chr17	+	43717669	43719667		GGAGCATTACACTGAGAAGTTTTCTCCTATTTTGTCTTTCATTCTCCACATCCTCTTTTG	intron sense-overlapping	NM_001256299	CRHR1	corticotropin-releasing factor receptor 1 isoform 5	+	43697709	43913194	49.7621	172.036	5.94635	7.10209	43.3945	60.6838	45.208	172.079	167.861	176.169	5.89207	5.88428	6.06269	7.01882	7.19662	7.09083
ASHGA5P042992	0.00715219	0.0312452	2.04567	down	noncoding	ENST00000439852	NPSR1-AS1	GENCODE	710	chr7	-	34606334	34797884		GGCTTCTTTAACAAATTAATCCCAAGTGCAAGACATTTATTTCTTCTGTACCTAATGACC	intronic antisense	NM_207172	NPSR1	neuropeptide S receptor isoform A	+	34697896	34889590	5	16.6103	2.45604	3.48861	5	5	5	21.0355	16.1163	12.679	2.46913	2.40305	2.49594	3.79485	3.5636	3.1074
ASHGA5P042992	0.00715219	0.0312452	2.04567	down	noncoding	ENST00000439852	NPSR1-AS1	GENCODE	710	chr7	-	34606334	34797884		GGCTTCTTTAACAAATTAATCCCAAGTGCAAGACATTTATTTCTTCTGTACCTAATGACC	intronic antisense	NM_207173	NPSR1	neuropeptide S receptor isoform B	+	34697896	34917944	5	16.6103	2.45604	3.48861	5	5	5	21.0355	16.1163	12.679	2.46913	2.40305	2.49594	3.79485	3.5636	3.1074
ASHGA5P044249	0.000605436	0.00752459	2.28696	down	noncoding	ENST00000521359	RP11-567J20.3	GENCODE	537	chr8	-	49428411	49429649		CCGGAAAGACTCCAATTTGACCTTAGTGCTTAATCCCTTTAGTTTGAAGTGTAGCTTAAA	intergenic							5	18.1934	2.45604	3.64947	5	5	5	18.9418	19.5359	16.1025	2.46913	2.40305	2.49594	3.62728	3.8649	3.45625
ASHGA5P040226	0.00539111	0.0261637	4.13913	down	noncoding	ENST00000507838	RP11-340B18.1	GENCODE	2163	chr4	+	166605790	166683930		GTGTGAGTCTGTATAAAAGATGGAATCATATTCTTCATGTTGCTTTCTATTCTGTTGTGC	intergenic							7.15891	49.7201	3.15915	5.20847	5	10.6188	5.85798	46.4064	54.4608	48.2932	2.46913	3.61986	3.38846	5.02618	5.45396	5.14529
ASHGA5P030122	4.2085e-05	0.00235282	2.70783	down	noncoding	ENST00000558010	RP11-279F6.2	GENCODE	890	chr15	-	69857062	69858129		TGTTAGCAGACGGTACAACATTGATAAATCTATGGTCTGTATTTTGTTCTGCCATTTCAA	intergenic							5	21.193	2.45604	3.89318	5	5	5	20.6077	21.2195	21.7518	2.46913	2.40305	2.49594	3.76118	3.99386	3.92449
ASHGA5P029886	0.000124378	0.00358719	2.2675	down	noncoding	ENST00000558671	CTD-3118D7.1	GENCODE	3355	chr15	-	29665805	29669160		AATCATCCCAGATCCCAACACTTAGAGATAGACAATTATATTTTGCTGTTTTGCCTTCCA	intron sense-overlapping	NM_015307	FAM189A1	protein FAM189A1	-	29412454	29862927	17.6747	71.0145	4.57341	5.75451	14.247	23.0024	15.7748	73.0252	67.8214	72.1969	4.42223	4.63066	4.66734	5.71039	5.79681	5.75635
ASHGA5P057963	8.45894e-05	0.00310145	3.16116	down	noncoding	TCONS_00024436	XLOC_011753	LincRNAs identified by Cabili et al	6847	chr16	+	65166561	65173706	TCONS_00024861	AGGGACTTAGACCTACCACTACTATGAAGCCTTTACTGAATTCGCTGGTTCCTGAGGTTT	intergenic							5	24.6187	2.45604	4.11649	5	5	5	25.4326	20.7211	27.7023	2.46913	2.40305	2.49594	4.09721	3.95618	4.2961
ASHGA5P021029	0.0209025	0.061787	4.23131	down	noncoding	ENST00000523658	RP11-402L5.1	GENCODE	648	chr8	-	100808842	100811415		AGTATAATAGCAAACATCCAATACAACCTCAACCATATTCATGTCCATCTTCATTCTCTC	intronic antisense	NM_017890	VPS13B	vacuolar protein sorting-associated protein 13B isoform 5	+	100025493	100889814	10.4063	63.8452	3.51052	5.59162	5	18.7269	7.49211	59.5166	62.325	69.694	2.46913	4.36401	3.69843	5.40393	5.66498	5.70597
ASHGA5P021029	0.0209025	0.061787	4.23131	down	noncoding	ENST00000523658	RP11-402L5.1	GENCODE	648	chr8	-	100808842	100811415		AGTATAATAGCAAACATCCAATACAACCTCAACCATATTCATGTCCATCTTCATTCTCTC	intronic antisense	NM_152564	VPS13B	vacuolar protein sorting-associated protein 13B isoform 1	+	100025493	100889814	10.4063	63.8452	3.51052	5.59162	5	18.7269	7.49211	59.5166	62.325	69.694	2.46913	4.36401	3.69843	5.40393	5.66498	5.70597
ASHGA5P042697	3.13702e-05	0.00201897	2.4034	down	noncoding	TCONS_00019425	XLOC_009243	LincRNAs identified by Cabili et al	424	chr11	+	87562335	87670780		TTTCCCCAGCTATTACCCCTGTATGCACACAAGTTGAACCTAACGGCATTAAAAGAAAAG	intergenic							27.9947	112.616	5.18263	6.44771	23.0851	36.797	24.1021	119.379	102.428	116.042	5.06287	5.24281	5.24223	6.45461	6.42787	6.46064
ASHGA5P031918	0.000618974	0.00762929	2.67274	down	noncoding	ENST00000561669	AC009120.10	GENCODE	475	chr16	+	74316312	74321417		GCTAACCTTCCTTCACAAGCCACCACATGCTGATTACATAGGAAAAAATAACTTTTAAAA	intergenic							32.4985	144.077	5.40527	6.82359	33.6948	35.5924	28.2081	165.756	136.541	129.934	5.56011	5.19961	5.45611	6.96566	6.87034	6.63478
ASHGA5P043267	0.00514701	0.0254175	3.06031	down	noncoding	ENST00000420807	RP11-452J13.1	GENCODE	779	chr1	+	193273874	193335083		GAGCCACTGTTTGTAGTTATTTGGGATCTTTGAGGAAACCCCTGCTAAAATAACTTGATT	intergenic							6.17253	34.0219	3.01553	4.62921	5	7.36411	6.15348	36.8884	32.4137	32.7635	2.46913	3.12862	3.44884	4.67493	4.65351	4.55919
ASHGA5P035245	7.68697e-05	0.00300372	2.12623	down	noncoding	ENST00000438409	AC016683.5	GENCODE	583	chr2	-	113931179	113932937		AACCTAGGCAGACCCACTTAGCTCACCTCCAAAGGACCCAAGAATGGATGGCTTGGCCTG	natural antisense	NM_012455	PSD4	PH and SEC7 domain-containing protein 4	+	113931559	113960677	33.4053	116.594	5.41524	6.50354	28.1024	44.586	27.5274	117.552	112.903	119.326	5.32471	5.49673	5.42429	6.43025	6.57739	6.50298
ASHGA5P028208	0.000901939	0.00923938	2.39216	down	noncoding	ENST00000550035	RP11-1041F24.1	GENCODE	247	chr12	+	92073907	92074650		TTCCTCTGAGAGAAGAGTATTTTGAATATTCGACTTTGCCCATGAATTTCCCTTTCCATG	intergenic							26.4301	103.966	5.07643	6.33474	19.4795	38.3307	21.4801	106.084	103.743	102.071	4.84069	5.29349	5.0951	6.28021	6.44545	6.27856
ASHGA5P032809	0.00525832	0.025722	2.16594	down	noncoding	TCONS_00029013	XLOC_013936	LincRNAs identified by Cabili et al	815	chr21	+	38666995	38668774		AGAATATCACGTTTTTCTGAAGTTTAAAAGCTACAGCCCAGTACTCTGAACCCAAGAATT	intergenic							10.1613	40.9628	3.80083	4.91583	10.2675	14.2281	5.9884	40.6467	37.8098	44.4319	3.98529	4.00218	3.41503	4.82392	4.89578	5.02778
ASHGA5P025834	0.0116084	0.0425174	2.92968	down	noncoding	NR_038399	LOC100132735	RefSeq	1307	chr6	+	140092209	140181608		TTCTCATTCTCCAGCAGCAAATAATCCCAAAGGAGGTAAACATCTAAAAGAAAGGAATGA	intergenic							6.23492	28.2026	2.7735	4.32425	5	8.70478	5	25.0996	33.7132	25.795	2.46913	3.35543	2.49594	4.07586	4.71427	4.18261
ASHGA5P022014	0.00423463	0.022558	3.27301	down	noncoding	ENST00000547094	RP11-654D12.3	GENCODE	400	chr12	+	90341469	90343503		GTTTACATCCTGGCTGTTTACCAAGTCCATCTTGAAAATCTTACTGTGATTCATGAATAT	intergenic							6.23763	30.9774	2.77426	4.48488	5	8.71288	5	32.4086	28.9432	31.5802	2.46913	3.35772	2.49594	4.47899	4.47423	4.50142
ASHGA5P029932	0.00932966	0.0370067	3.50586	down	noncoding	ENST00000561320	RP11-346D14.1	GENCODE	2471	chr15	-	38431795	38519066	ENST00000561161	ATCTGATACTGTGAAATATTTCTTATCTTGATTTTCTCCTGGATAAGATCCTGGAGCTTG	intergenic							6.85271	34.8934	2.85885	4.66862	5	10.5581	5	33.7946	31.9808	38.9048	2.46913	3.61149	2.49594	4.5468	4.63345	4.82562
ASHGA5P017203	0.00907968	0.0364509	2.28845	down	noncoding	ENST00000438867	RP11-157D23.2	GENCODE	786	chrX	-	39260505	39294078		AAAGGTTCCTGGAAGGACTACTTAGGAATTGAATGTGCTGAGACTTCCTCTCAAAGGAGC	intergenic							10.2798	44.1847	3.84116	5.03553	6.53773	12.7004	11.6012	45.5992	41.0963	45.8587	3.39779	3.85725	4.26843	5.00315	5.02921	5.07423
ASHGA5P029063	0.0093024	0.0369731	2.62246	down	noncoding	uc001eql.2	FLJ39739	UCSC_knowngene	2257	chr1	-	147835126	147931980		GAGAGGTACCAAATCACATTCCAGTTTATTTCTCAACTCTAATAATGTCCCTTTCTTCAT	intergenic							11.3288	52.2891	3.89672	5.28765	11.3028	17.0884	5.59523	54.5755	53.7339	48.5579	4.1136	4.24439	3.33218	5.27624	5.43206	5.15464
ASHGA5P054615	0.00287798	0.0177233	2.22245	down	noncoding	ENST00000519451	RP11-962G15.1	GENCODE	514	chr8	-	36622471	36636682		ATCTTAATAGGTGAGTACATAATTGGCTTCCCTGTATCTAAATCTAGACGCAACTCTGTT	intergenic							19.7304	75.9035	4.70715	5.8593	20.5153	25.5462	13.1297	75.6628	81.0925	70.9552	4.90731	4.77462	4.43952	5.76887	6.07712	5.73192
ASHGA5P037537	0.000154089	0.00398469	2.11992	down	noncoding	TCONS_00025553	XLOC_012379	LincRNAs identified by Cabili et al	513	chr17	-	7607076	7608261		TTTCAACACCTTTACTCTTTTATGTGTGTCCTTGACTCTGGCAACTGGGTTGTCTGCCTC	intergenic							15.7773	60.6562	4.42276	5.50677	14.205	20.7803	12.3466	68.7855	56.4848	56.6983	4.41692	4.49505	4.3563	5.62288	5.50547	5.39196
ASHGA5P019980	0.0148161	0.0495395	2.0502	down	noncoding	ENST00000506247	RP11-159F24.1	GENCODE	579	chr5	-	43588742	43603332		AAAGAAACAGGGAAGCAGCGGAATACAAGAGACTGAACTGTATCTGCCTCTGTTTCCAAA	natural antisense	NM_012343	NNT	NAD(P) transhydrogenase, mitochondrial	+	43602790	43705668	183.79	492.68	7.64004	8.67581	170.208	225.479	155.685	484.684	607.491	385.865	7.68166	7.55196	7.68651	8.60849	9.13602	8.2829
ASHGA5P019980	0.0148161	0.0495395	2.0502	down	noncoding	ENST00000506247	RP11-159F24.1	GENCODE	579	chr5	-	43588742	43603332		AAAGAAACAGGGAAGCAGCGGAATACAAGAGACTGAACTGTATCTGCCTCTGTTTCCAAA	natural antisense	NM_182977	NNT	NAD(P) transhydrogenase, mitochondrial	+	43603228	43705668	183.79	492.68	7.64004	8.67581	170.208	225.479	155.685	484.684	607.491	385.865	7.68166	7.55196	7.68651	8.60849	9.13602	8.2829
ASHGA5P027031	0.00054138	0.0071127	4.2096	down	noncoding	uc001dix.4	U80773	UCSC_knowngene	1522	chr1	-	83439565	83451891		AGAATGGGTATCTCAGGCTGTGAGTAATTTGATATAGAACTTTTCACCTCCAGGTCAGTG	intergenic							5.48485	36.4022	2.6462	4.71988	5	6.45456	5	37.9468	29.525	41.7349	2.46913	2.97352	2.49594	4.7192	4.50573	4.93471
ASHGA5P046140	2.69636e-05	0.00189817	2.67782	down	noncoding	ENST00000456037	RP11-149B9.2	GENCODE	756	chrX	-	28589648	28604512		CAAAAGAGTTCGCTGCTGGTTTCTGAGATGAATTTGTGATGAAGAAAGAGGGTCAAAGTA	intergenic							5	20.9912	2.45604	3.8771	5	5	5	22.8692	20.5746	19.5299	2.46913	2.40305	2.49594	3.92706	3.9458	3.75843
ASHGA5P040061	0.0300717	0.078702	2.8595	down	noncoding	ENST00000512129	LEF1-AS1	GENCODE	430	chr4	+	109097443	109177992		CGGCTTCAGGAGTACAAGTTTCCCCATCAAAGGTTTGGAATAAATTACACTAAAAAATTG	intergenic							7.94902	36.4433	3.21686	4.73263	5	13.751	5.09604	31.4284	39.8584	38.0432	2.46913	3.96267	3.2188	4.4306	4.97712	4.79016
ASHGA5P056232	0.00151015	0.0122039	5.32189	down	noncoding	TCONS_00001278	XLOC_000566	LincRNAs identified by Cabili et al	265	chr1	+	219391857	219467786		TATATTGAAGATGCCTGATGCATTTTCTTCTGACTCAGTCTTCTGTTTTTCATGGAGAAC	intergenic							6.32527	49.5788	2.78924	5.20118	5	8.97582	5	56.0587	44.1349	48.5428	2.46913	3.40266	2.49594	5.31537	5.13394	5.15424
ASHGA5P045642	0.0362443	0.0895939	2.1815	down	noncoding	TCONS_00001829	XLOC_001212	LincRNAs identified by Cabili et al	1238	chr1	-	221728933	221736978		ACATTCTCTGTTCTCTAGGCCAAGAGTTTGTGGAGCTATTGAAATGGGAGTAAGGGAGGA	intergenic							6.46052	25.9391	3.07272	4.19804	5	7.37852	7.00306	30.4772	25.7583	21.5819	2.46913	3.13256	3.61648	4.38476	4.29846	3.9109
ASHGA5P053338	0.00103154	0.00987608	2.00933	down	noncoding	ENST00000494289	RP11-707F14.3	pseudogene	481	chr7	+	141611262	141611743		CTCCCAGTAAGTATGCCATTTGTTACCTTCTTCCTTTGTCAGTGATTGTAATAAGAAATT								52.9793	162.419	6.00976	7.01647	42.2101	69.6914	47.0363	162.751	167.148	157.36	5.85533	6.05824	6.1157	6.93914	7.1911	6.91917
ASHGA5P018049	0.0184696	0.0569769	2.2474	down	noncoding	ENST00000448831	RP11-293P20.3	GENCODE	418	chr1	-	24382585	24410622		ATATTTACCCTGCGCCAGGTACTGTTCTGGCATTTTTCATATGTGAGGAAAGGGAAGGAG	exon sense-overlapping	NM_152372	MYOM3	myomesin-3	-	24382530	24438665	5.52316	24.0817	2.89115	4.05941	5	6.33744	5.23205	22.7372	18.7339	30.774	2.46913	2.95538	3.24896	3.91879	3.80138	4.45807
ASHGA5P040586	0.000560214	0.00725368	3.36584	down	noncoding	TCONS_00021915	XLOC_010506	LincRNAs identified by Cabili et al	527	chr13	+	112928666	112929999		TACTTTTCCTCCAGACATTTTCTCAAGCCAGAAGAATGAGCACAGCCCACATCTGAAGCA	intergenic							8.16334	51.9035	3.52331	5.27428	7.07493	11.9725	5.4426	47.69	50.5547	57.466	3.49301	3.77944	3.29747	5.0684	5.34153	5.4129
ASHGA5P032956	0.00159827	0.0126414	2.50713	down	noncoding	ENST00000456235	AC087393.1	GENCODE	750	chr17	+	20978868	20993928		GCTCAGCAATTTTCTTGGAGACCTCAGTGCTCATGTTATTCTTTCCTCTATCTTATGTTT	intergenic							27.2475	113.265	5.13507	6.46111	19.1443	36.4892	26.109	114.229	113.463	112.102	4.81702	5.23373	5.35445	6.38925	6.58449	6.40959
ASHGA5P040321	0.00047999	0.00671372	2.2913	down	noncoding	ENST00000524505	RP4-791M13.4	GENCODE	573	chr1	+	144858210	144865740		TTTTATTGAATTGCCAAAACAGCATAATCATGTTATTGTCACCTTCATTTGACAAATAAG	intronic antisense	NM_001198832	PDE4DIP	myomegalin isoform 8	-	144851423	145039992	5	18.1988	2.45604	3.65221	5	5	5	17.2271	19.4252	17.9442	2.46913	2.40305	2.49594	3.47129	3.85552	3.62982
ASHGA5P040321	0.00047999	0.00671372	2.2913	down	noncoding	ENST00000524505	RP4-791M13.4	GENCODE	573	chr1	+	144858210	144865740		TTTTATTGAATTGCCAAAACAGCATAATCATGTTATTGTCACCTTCATTTGACAAATAAG	intronic antisense	NM_001198834	PDE4DIP	myomegalin isoform 9	-	144851423	144995033	5	18.1988	2.45604	3.65221	5	5	5	17.2271	19.4252	17.9442	2.46913	2.40305	2.49594	3.47129	3.85552	3.62982
ASHGA5P040321	0.00047999	0.00671372	2.2913	down	noncoding	ENST00000524505	RP4-791M13.4	GENCODE	573	chr1	+	144858210	144865740		TTTTATTGAATTGCCAAAACAGCATAATCATGTTATTGTCACCTTCATTTGACAAATAAG	intronic antisense	NM_014644	PDE4DIP	myomegalin isoform 1	-	144851426	144995022	5	18.1988	2.45604	3.65221	5	5	5	17.2271	19.4252	17.9442	2.46913	2.40305	2.49594	3.47129	3.85552	3.62982
ASHGA5P027504	0.0109627	0.0409057	2.49614	down	noncoding	ENST00000553163	RP11-536G4.2	GENCODE	457	chr12	-	96252014	96252471		ATTTACTTTGTCTTTTTACACCCGTGAGAATGTTCGGGGTCCCAGAGTTCCTTCCTCACT	bidirectional	NM_003095	SNRPF	small nuclear ribonucleoprotein F	+	96252708	96260238	11.2835	51.5328	3.93923	5.25893	6.52058	15.0361	12.2937	52.9935	44.4238	57.1812	3.39374	4.07396	4.35	5.22878	5.14344	5.40458
ASHGA5P032130	0.00422346	0.0225228	5.27836	down	noncoding	ENST00000573755	RP11-530N7.3	GENCODE	539	chr17	-	6857416	6882279		GCCCAGATTTTTCCTTTGTACTTTCTTTATTTTGACCACATGCTGATAAAGTTCCTGCTC	intron sense-overlapping	ENST00000575889	MIR497HG	mir-497-195 cluster host gene (non-protein coding) [Source:HGNC Symbol;Acc:39523]	-	6780106	6915636	6.79489	59.6197	3.08833	5.48842	9.13023	6.25443	5	57.7479	64.9143	56.1967	3.82677	2.94228	2.49594	5.35663	5.72994	5.37868
ASHGA5P047054	0.0272529	0.0738672	2.11101	down	noncoding	AK093610		LincRNAs identified by Khalil et al	2514	chr2	-	60245851	60248365		GTGGTGCTGGCCATTTTTCAAAAGCAAATGTAACTTCTTTCTGGAGGATAATTTTATACT	intergenic							18.2229	68.5847	4.62282	5.70075	15.3316	15.7036	23.6335	72.3575	63.0394	70.3573	4.51855	4.13376	5.21614	5.69811	5.68419	5.71993
ASHGA5P020596	0.00182533	0.013627	2.35985	down	noncoding	ENST00000517335	RP11-175K6.1	GENCODE	691	chr5	+	158527490	158542331		AAAGCAGGACGCGCGTCCCAGACATGATCGCTGGTAACAGATGCCTGGTTCACTCTCATC	bidirectional	NM_024007	EBF1	transcription factor COE1	-	158122922	158526788	5	18.9273	2.45604	3.69474	5	5	5	16.8904	16.8741	23.0174	2.46913	2.40305	2.49594	3.44279	3.63276	4.00866
ASHGA5P026453	0.000365499	0.00586507	2.51234	down	noncoding	ENST00000544421	RP11-881M11.2	GENCODE	810	chr11	+	60674260	60677214		GTCCTGACTACTACCATTTCGCTCTGTGATTTGGGGCAATTCACATTGCCCTTTCTTCTT	bidirectional	NM_014502	PRPF19	pre-mRNA-processing factor 19	-	60658019	60674061	17.9715	80.5203	4.61161	5.94064	15.2017	21.5963	17.1165	93.6333	72.4691	75.4586	4.50843	4.54484	4.78158	6.0991	5.90182	5.82101
ASHGA5P021276	6.43784e-05	0.00280617	2.09017	down	noncoding	ENST00000529264	RP11-445F12.1	GENCODE	640	chr17	-	35264572	35293951		ATGATACAATACTTTCTGGTGCTGACATTCAGCTGTCTCCCAAACAGCTCTCAATCTGGG	bidirectional	NM_005568	LHX1	LIM/homeobox protein Lhx1	+	35294771	35301915	72.7017	221.251	6.4107	7.47432	62.3982	99.4465	56.2605	240.7	193.282	229.772	6.36839	6.5111	6.35261	7.52771	7.40917	7.48607
ASHGA5P033657	0.0107427	0.0403676	2.21419	down	noncoding	ENST00000562795	RP11-669I1.1	GENCODE	1179	chr18	-	71878625	71879804		TTGCTTCTTTTGACAGTAACGTTATTATGACTGTAAGCAATGCTACTCTGCCTTCACTAG	intergenic							9.36276	40.3274	3.74446	4.89124	11.7264	9.2504	7.11144	38.261	44.9989	37.7223	4.15812	3.4388	3.63645	4.73228	5.16291	4.77852
ASHGA5P021188	0.00390088	0.0213044	2.4199	down	noncoding	ENST00000527283	RP11-2F20.1	GENCODE	554	chr11	-	24257022	24283751		GAGATCCAAAGATATTCAAGCTCTCTTTGTTCCTGCATCTGAAGAATGGGTTAAGAATAG	intergenic							17.5365	76.6681	4.59796	5.8729	16.7148	17.1866	18.7083	74.299	80.3257	75.3795	4.63876	4.25132	4.90379	5.7392	6.06107	5.81843
ASHGA5P052361	0.000131892	0.00370764	2.86915	down	noncoding	ENST00000513687	RP11-159K7.2	GENCODE	541	chr5	+	111964553	111966262		CCTCTTTCTTTATAGCAAATTACACCATTAATGTCATCCTGGCGAATGAAACAAGAGAAT	intergenic							5	22.3916	2.45604	3.97667	5	5	5	24.1297	23.1695	19.8755	2.46913	2.40305	2.49594	4.01312	4.13094	3.78593
ASHGA5P039629	0.00036412	0.00586507	2.45314	down	noncoding	ENST00000506645	RP11-362F19.1	GENCODE	592	chr4	-	142240603	142244716		CACCCCAGTCTTTAACTCTATGCTCTGCTATCTCTTCCATCTAAAAATACAAAAACTGAT	intergenic							38.0503	147.561	5.56764	6.86227	33.3298	52.5817	28.2393	166.86	141.783	134.039	5.54444	5.70047	5.45801	6.97659	6.92884	6.68137
ASHGA5P016123	0.000495626	0.00680673	3.92529	down	noncoding	ENST00000427046	RP11-467D18.2	GENCODE	573	chr1	+	29550444	29551328		TGATAAAGAGGAGTAACTGAAGATAATTGGAGACTAACGTGATTTCCTCACTGCCATAAT	intronic antisense	NM_001024732	MECR	trans-2-enoyl-CoA reductase, mitochondrial isoform b	-	29519384	29557454	5.38823	33.5141	2.63132	4.60412	5	6.16467	5	30.2787	32.6668	37.5967	2.46913	2.92889	2.49594	4.37347	4.6653	4.7736
ASHGA5P016123	0.000495626	0.00680673	3.92529	down	noncoding	ENST00000427046	RP11-467D18.2	GENCODE	573	chr1	+	29550444	29551328		TGATAAAGAGGAGTAACTGAAGATAATTGGAGACTAACGTGATTTCCTCACTGCCATAAT	intronic antisense	NM_016011	MECR	trans-2-enoyl-CoA reductase, mitochondrial isoform a	-	29519384	29557454	5.38823	33.5141	2.63132	4.60412	5	6.16467	5	30.2787	32.6668	37.5967	2.46913	2.92889	2.49594	4.37347	4.6653	4.7736
ASHGA5P014794	0.000118158	0.00352041	2.66837	down	noncoding	ENST00000413431	RP11-77G23.2	GENCODE	189	chr10	-	76762812	76784932		AATCTCACAGGTTTAGAGCAGGCAGTGACATCTTCTTTCTGATGCAACTGAAATGATCTT	natural antisense	NM_001256468	KAT6B	histone acetyltransferase KAT6B isoform 2	+	76586170	76792380	5	20.9838	2.45604	3.872	5	5	5	19.8843	19.9283	23.1389	2.46913	2.40305	2.49594	3.70371	3.89644	4.01586
ASHGA5P014794	0.000118158	0.00352041	2.66837	down	noncoding	ENST00000413431	RP11-77G23.2	GENCODE	189	chr10	-	76762812	76784932		AATCTCACAGGTTTAGAGCAGGCAGTGACATCTTCTTTCTGATGCAACTGAAATGATCTT	natural antisense	NM_001256469	KAT6B	histone acetyltransferase KAT6B isoform 3	+	76586170	76792380	5	20.9838	2.45604	3.872	5	5	5	19.8843	19.9283	23.1389	2.46913	2.40305	2.49594	3.70371	3.89644	4.01586
ASHGA5P014794	0.000118158	0.00352041	2.66837	down	noncoding	ENST00000413431	RP11-77G23.2	GENCODE	189	chr10	-	76762812	76784932		AATCTCACAGGTTTAGAGCAGGCAGTGACATCTTCTTTCTGATGCAACTGAAATGATCTT	natural antisense	NM_012330	KAT6B	histone acetyltransferase KAT6B isoform 1	+	76586170	76792380	5	20.9838	2.45604	3.872	5	5	5	19.8843	19.9283	23.1389	2.46913	2.40305	2.49594	3.70371	3.89644	4.01586
ASHGA5P046197	0.00314858	0.0186828	3.33276	down	noncoding	TCONS_00017157	XLOC_007963	LincRNAs identified by Cabili et al	343	chrX	+	43278112	43297884		GATCCTGTGAAGCCATTATTAGCTCTTGACTCAATGGCAACAGCCCTTTTTTCCATTTGA	intergenic							6.12223	31.1048	2.75495	4.49166	5	8.36669	5	32.4233	30.0886	30.8025	2.46913	3.29977	2.49594	4.48023	4.53488	4.45987
ASHGA5P022192	0.00806388	0.0337966	3.95177	down	noncoding	ENST00000551905	RP11-341G23.2	GENCODE	478	chr12	-	104048557	104051773		TTTTTGTGGTAGATTCCCAGGTTTCTATTGGAAACAGACAAACCACCTCTTCTTCTCTCT	intronic antisense	NM_017564	STAB2	stabilin-2 precursor	+	103981068	104160502	6.45568	43.4549	3.02813	5.01063	8.99147	5.37556	5	45.2701	44.132	40.9627	3.81021	2.77824	2.49594	4.99079	5.13379	4.90731
ASHGA5P045472	0.00998154	0.0385279	2.10369	down	noncoding	ENST00000444800	RP11-423C15.3	GENCODE	509	chr9	-	128506032	128508019		CCCGAGTCTGTCTTTGCTGTTTCTAAGGTAGTGATTATTAAAATGTCAAGGGAAATGAAA	intergenic							22.0085	79.6607	4.85862	5.93155	15.0678	26.5441	24.4135	88.6731	76.6889	73.6201	4.49548	4.82254	5.25785	6.01975	5.99057	5.78432
ASHGA5P040938	0.00323684	0.0190117	2.06562	down	noncoding	ENST00000416894	LINC00568	GENCODE	566	chr1	+	150488232	150490508		CTCTTAATGTATTTCTGCACTCTACACTAGCAGCCTATTACACAGGACACTTGGATGTCT	intergenic							18.8628	69.4788	4.67572	5.72229	21.7777	19.5975	15.2133	71.3505	66.0904	70.9957	4.98355	4.42154	4.62207	5.67845	5.7552	5.73324
ASHGA5P056889	0.0394534	0.0952784	2.18622	down	noncoding	TCONS_00010293	XLOC_004766	LincRNAs identified by Cabili et al	447	chr5	-	30101585	30102332		GTGAATTTTGGCTTAATTTGCTCTTCTTTGTCAAGATTTCTAATGCTGAGCTGAGCTAGT	intergenic							7.23815	28.0355	3.19888	4.32732	5	9.48896	7.22549	30.6752	27.4048	26.0266	2.46913	3.47024	3.65728	4.39649	4.38867	4.19679
ASHGA5P046479	0.00297187	0.0181078	2.03684	down	noncoding	ENST00000428263	TAB3-AS1	GENCODE	245	chrX	+	30852739	30853417		CAGTACAACTCATCTTTGGAAATCACTGCTCCAGAATCCAAAGCATGGTGCTCAGGTACT	intronic antisense	NM_152787	TAB3	TGF-beta-activated kinase 1 and MAP3K7-binding protein 3	-	30845558	30907511	5	16.4166	2.45604	3.48237	5	5	5	14.8387	14.5665	19.8446	2.46913	2.40305	2.49594	3.25649	3.40723	3.7834
ASHGA5P019433	0.00678627	0.0302099	3.19435	down	noncoding	NR_047564	CRB1	RefSeq	5266	chr1	+	197237333	197447585		AATAATTAAGTTGGCAGATGACTTGATCTCCGACATTTTCACCACTATTGGCTCAGTGAC	exon sense-overlapping	NM_001193640	CRB1	crumbs homolog 1 isoform 2 precursor	+	197237333	197447585	6.5719	37.0435	3.08931	4.76483	5	8.02216	6.69355	37.0737	35.9235	38.1333	2.46913	3.24141	3.5574	4.68251	4.81764	4.79435
ASHGA5P019433	0.00678627	0.0302099	3.19435	down	noncoding	NR_047564	CRB1	RefSeq	5266	chr1	+	197237333	197447585		AATAATTAAGTTGGCAGATGACTTGATCTCCGACATTTTCACCACTATTGGCTCAGTGAC	exon sense-overlapping	NM_001257965	CRB1	crumbs homolog 1 isoform 3	+	197170591	197447585	6.5719	37.0435	3.08931	4.76483	5	8.02216	6.69355	37.0737	35.9235	38.1333	2.46913	3.24141	3.5574	4.68251	4.81764	4.79435
ASHGA5P019433	0.00678627	0.0302099	3.19435	down	noncoding	NR_047564	CRB1	RefSeq	5266	chr1	+	197237333	197447585		AATAATTAAGTTGGCAGATGACTTGATCTCCGACATTTTCACCACTATTGGCTCAGTGAC	exon sense-overlapping	NM_001257966	CRB1	crumbs homolog 1 isoform 4 precursor	+	197237333	197447585	6.5719	37.0435	3.08931	4.76483	5	8.02216	6.69355	37.0737	35.9235	38.1333	2.46913	3.24141	3.5574	4.68251	4.81764	4.79435
ASHGA5P019433	0.00678627	0.0302099	3.19435	down	noncoding	NR_047564	CRB1	RefSeq	5266	chr1	+	197237333	197447585		AATAATTAAGTTGGCAGATGACTTGATCTCCGACATTTTCACCACTATTGGCTCAGTGAC	exon sense-overlapping	NM_201253	CRB1	crumbs homolog 1 isoform 1 precursor	+	197237333	197447585	6.5719	37.0435	3.08931	4.76483	5	8.02216	6.69355	37.0737	35.9235	38.1333	2.46913	3.24141	3.5574	4.68251	4.81764	4.79435
ASHGA5P043182	0.00044927	0.00650521	2.57811	down	noncoding	ENST00000420245	AC002064.4	GENCODE	289	chr7	-	89895347	89899530		GCACTGGATCAATTGTGTATCTTTTATTCCTCCTGTACAAATAAAGACCTAAACTAGTAA	intronic antisense	NM_001039706	C7orf63	uncharacterized protein C7orf63 isoform 1	+	89874487	89940377	16.7728	76.4237	4.50504	5.87135	13.3378	21.4033	15.5771	84.5238	75.6293	69.1179	4.33048	4.53437	4.65026	5.94788	5.97198	5.69418
ASHGA5P043182	0.00044927	0.00650521	2.57811	down	noncoding	ENST00000420245	AC002064.4	GENCODE	289	chr7	-	89895347	89899530		GCACTGGATCAATTGTGTATCTTTTATTCCTCCTGTACAAATAAAGACCTAAACTAGTAA	intronic antisense	NM_001160138	C7orf63	uncharacterized protein C7orf63 isoform 2	+	89874487	89940377	16.7728	76.4237	4.50504	5.87135	13.3378	21.4033	15.5771	84.5238	75.6293	69.1179	4.33048	4.53437	4.65026	5.94788	5.97198	5.69418
ASHGA5P015190	0.00034308	0.00570007	2.88582	down	noncoding	ENST00000417715	AC073928.2	GENCODE	444	chr2	-	140861151	140889349		CTGATGTTTGGCCTTCCTGAATGTCATGTAATACGTATTCATTTTTTCCAGCTGAAAATA	intergenic							38.4131	178.48	5.63002	7.159	38.356	42.0478	34.8355	186.687	181.095	167.659	5.73308	5.421	5.736	7.14859	7.31101	7.01741
ASHGA5P021421	1.35745e-05	0.00151943	2.04308	down	noncoding	ENST00000532103	RP11-574M7.1	GENCODE	441	chr11	+	50301078	50303035		AACCCCAAAAGCTATAATAGGCCCAGGAATCTGTACTTCGAATGTTTCTTCAGTTGGTCT	intergenic							5	16.4196	2.45604	3.48679	5	5	5	17.987	15.3547	15.9172	2.46913	2.40305	2.49594	3.53729	3.48643	3.43664
ASHGA5P045206	0.0183811	0.0568373	2.0833	down	noncoding	TCONS_00001047	XLOC_000308	LincRNAs identified by Cabili et al	881	chr1	+	95783150	95787167		TCATTCGCTCCACGGGAGAAATAACATTCCTGTGCGATGCCACTTGCCACTTCATTTTTA	intergenic							16.882	61.4471	4.47677	5.53564	10.3395	22.3256	17.981	58.1467	65.3564	60.8383	3.99375	4.58842	4.84814	5.36901	5.7408	5.49711
ASHGA5P040079	0.0257165	0.0708534	2.09917	down	noncoding	ENST00000442020	AC108056.1	GENCODE	576	chr4	+	118755555	118791103		AGAAGTCCCATTCAGCCCAGTATTTGTTCTCAAATGTCATAAATGCTGTGGACAAGAAAC	intergenic							12.761	51.3887	4.16627	5.23609	12.8366	10.9025	14.5439	64.9353	41.0766	48.1544	4.28084	3.65608	4.56189	5.53675	5.02807	5.14344
ASHGA5P025929	0.0236654	0.0671179	2.50917	down	noncoding	uc003jab.2	MAFIP	UCSC_knowngene	2584	chr4_gl000194_random	-	53592	115010		ACAAGAAACGAATAAATCTCTGGAAGCTCTTGGTTTACTGTGTCACCCAAGCGACTGGGA	intergenic							7.69204	39.558	3.49321	4.82042	6.33853	7.66512	9.07247	36.7001	52.1865	29.7874	3.36009	3.17943	3.94011	4.66601	5.38958	4.40567
ASHGA5P044557	0.0341671	0.085981	2.05449	down	noncoding	uc003yvm.3	DQ574852	UCSC_knowngene	4833	chr8	-	141531042	141535875	ENST00000560295	TTGGGGCAGGTGATTAAATTTATATAGGTACCTCAAGAAAAAGAACCTGAATATGCTGCA	intergenic							2583.54	6022.13	11.2613	12.3001	1841.52	3604.27	2304.85	7117.94	7022.89	3925.56	10.9398	11.4705	11.3736	12.5483	12.6209	11.731
ASHGA5P023713	0.00834385	0.0345291	2.07604	down	noncoding	HMlincRNA1584-	HMlincRNA1584	LincRNAs identified by Khalil et al	10676	chr3	-	46129526	46140202		GCCTCCCACAGAGGAGTGAGTCTTCTCTGTTTTGCAAGAAAAGCAGGAAGTATGTTGAAA	intergenic							60.2991	191.872	6.20742	7.26125	68.4259	60.9058	51.5656	215.085	193.885	166.645	6.49639	5.89026	6.2356	7.36298	7.41403	7.00673
ASHGA5P023750	0.00102157	0.00984804	2.52164	down	noncoding	HMlincRNA1654+	HMlincRNA1654	LincRNAs identified by Khalil et al	13701	chrX	+	105625324	105639025		TAATCATGTGCTTCCAGCCTAGAAGTGTCTTGGGTGAGTACATGTAAGTACCCAGCTGTA	intergenic							5	20.0553	2.45604	3.7904	5	5	5	24.128	19.4982	16.5398	2.46913	2.40305	2.49594	4.01293	3.86199	3.49629
ASHGA5P022890	0.00104691	0.00988865	2.33279	down	noncoding	ENST00000564875	RP11-491F9.1	GENCODE	654	chr16	+	49321340	49324138		GCTTGATCCAGGCCTATCAGATATATTCCATTGAAAGTCCTCATTCTCAAATTTAAAACA	intergenic							6.02659	29.6373	3.19414	4.4162	5.01357	6.90521	6.16099	28.7458	29.6182	30.548	3.07805	3.05396	3.45041	4.29278	4.51069	4.44512
ASHGA5P023439	0.0107194	0.0403109	3.95213	down	noncoding	ENST00000580931	RP11-434D2.12	GENCODE	353	chr17	-	20479979	20482061		CAGACCCCTCTTAGCAGAATACTTCCATGAGGTAATAAAAGGTTTAATTTATTTCAGAAG	bidirectional	NM_001190790	CDRT15L2	CMT1A duplicated region transcript 15 protein-like protein	+	20483036	20484224	7.27272	47.45	3.15999	5.14262	10.1712	6.6469	5	48.3635	48.9739	45.0127	3.9732	3.01082	2.49594	5.08926	5.29064	5.04796
ASHGA5P056159	0.00484916	0.0244414	3.42253	down	noncoding	ENST00000452120	MEG3	GENCODE	4489	chr14	+	101292469	101299665		GCTCACAAAGGTAAAGACTTTTCTGTGGCTTAATCCTTGTCATGTTTTCGGCTCATGGAC	intergenic							9.50573	57.3885	3.64902	5.42408	5.05736	15.9511	7.50876	58.7415	50.6533	62.7708	3.09039	4.15499	3.70169	5.38387	5.34425	5.54414
ASHGA5P022272	8.75933e-05	0.00311909	3.29342	down	noncoding	ENST00000553747	RP11-479H16.1	GENCODE	280	chr14	-	48235888	48259146		TCTACTCTGTTGTCCCAGAGTCGATGTATTCTACCTTTGTCGACCAGAACTTCTCCATCA	intergenic							5	25.4719	2.45604	4.17563	5	5	5	28.274	25.6831	22.4586	2.46913	2.40305	2.49594	4.26264	4.2945	3.96974
ASHGA5P031568	0.00999379	0.0385615	2.23798	down	noncoding	ENST00000567465	RP11-14N9.2	GENCODE	674	chr16	+	16752083	16757992		GTTCAAGGCTCTGCCCAAATATGTGATGGTGGAATTTATTATGATATGCAAATGATACTT	intergenic							5.84605	21.0515	2.70811	3.87031	5	7.53815	5	20.1826	18.6049	24.3672	2.46913	3.15927	2.49594	3.72642	3.7915	4.093
ASHGA5P031614	0.00429535	0.0227555	2.25638	down	noncoding	ENST00000451829	RP11-444D13.1	GENCODE	364	chr1	-	183723552	183724072		TATTGAGTCATCACTGGTAAGTAGCAGCTCAGCCAGAGATTACATCTCCCCATCACACAT	intronic antisense	NM_015149	RGL1	ral guanine nucleotide dissociation stimulator-like 1	+	183605207	183897666	3832.09	9328.97	11.8139	12.9879	2790.47	5593.54	3112.28	9677.58	8364.95	9944.39	11.4915	12.142	11.8083	12.985	12.8647	13.1142
ASHGA5P047154	0.000140777	0.0038162	3.58066	down	noncoding	AK022462R		LincRNAs identified by Khalil et al	1784	chr2	+	175921561	175923345		GAAAGTGTGGATGATCTGGACTCAGGATCATTTCTTGCTACTCCTCTAGGCATAGAGGAT	intergenic							5	27.5797	2.45604	4.29627	5	5	5	25.7202	24.7201	32.2987	2.46913	2.40305	2.49594	4.11314	4.23756	4.5381
ASHGA5P000256	0.00189438	0.0139503	2.0739	down	noncoding	chr13:57331500-57346525+	chr13:57331500-57346525	LincRNAs identified by Khalil et al	15025	chr13	+	58433499	58448524		GCTCTCATCCTCTGCTGAATAAGGAACAATTCCTTTTAAAGTATTAACTGATAACCACAT	intergenic							29.7755	101.056	5.23672	6.28907	21.3446	42.5077	25.4743	109.746	92.4204	101.002	4.95802	5.43386	5.31828	6.32706	6.27744	6.26271
ASHGA5P015653	0.00975861	0.0379814	2.75831	down	noncoding	ENST00000422239	AC007285.6	GENCODE	893	chr7	+	30028215	30065216		TGAGTCAAAGCAGACCACATTTCTCTCGGCCCTCGCGAGTGAGGTCGCCAAATACTCGAC	intronic antisense	NM_001145513	SCRN1	secernin-1 isoform a	-	29959718	30029734	6.09049	26.2558	2.7506	4.21439	5	8.27148	5	29.7358	27.8535	21.1781	2.46913	3.28673	2.49594	4.34668	4.41304	3.88344
ASHGA5P015653	0.00975861	0.0379814	2.75831	down	noncoding	ENST00000422239	AC007285.6	GENCODE	893	chr7	+	30028215	30065216		TGAGTCAAAGCAGACCACATTTCTCTCGGCCCTCGCGAGTGAGGTCGCCAAATACTCGAC	intronic antisense	NM_001145514	SCRN1	secernin-1 isoform b	-	29959718	30029905	6.09049	26.2558	2.7506	4.21439	5	8.27148	5	29.7358	27.8535	21.1781	2.46913	3.28673	2.49594	4.34668	4.41304	3.88344
ASHGA5P015653	0.00975861	0.0379814	2.75831	down	noncoding	ENST00000422239	AC007285.6	GENCODE	893	chr7	+	30028215	30065216		TGAGTCAAAGCAGACCACATTTCTCTCGGCCCTCGCGAGTGAGGTCGCCAAATACTCGAC	intronic antisense	NM_001145515	SCRN1	secernin-1 isoform c	-	29959718	30029425	6.09049	26.2558	2.7506	4.21439	5	8.27148	5	29.7358	27.8535	21.1781	2.46913	3.28673	2.49594	4.34668	4.41304	3.88344
ASHGA5P015653	0.00975861	0.0379814	2.75831	down	noncoding	ENST00000422239	AC007285.6	GENCODE	893	chr7	+	30028215	30065216		TGAGTCAAAGCAGACCACATTTCTCTCGGCCCTCGCGAGTGAGGTCGCCAAATACTCGAC	intronic antisense	NM_014766	SCRN1	secernin-1 isoform a	-	29959718	30029425	6.09049	26.2558	2.7506	4.21439	5	8.27148	5	29.7358	27.8535	21.1781	2.46913	3.28673	2.49594	4.34668	4.41304	3.88344
ASHGA5P015653	0.00975861	0.0379814	2.75831	down	noncoding	ENST00000422239	AC007285.6	GENCODE	893	chr7	+	30028215	30065216		TGAGTCAAAGCAGACCACATTTCTCTCGGCCCTCGCGAGTGAGGTCGCCAAATACTCGAC	intronic antisense	NM_017946	FKBP14	peptidyl-prolyl cis-trans isomerase FKBP14 precursor	-	30050198	30066417	6.09049	26.2558	2.7506	4.21439	5	8.27148	5	29.7358	27.8535	21.1781	2.46913	3.28673	2.49594	4.34668	4.41304	3.88344
ASHGA5P032020	0.0286866	0.0763038	2.84344	down	noncoding	TCONS_00029624	XLOC_014280	LincRNAs identified by Cabili et al	1499	chr22	+	49246607	49262410		CATGAATGGGAAATCCACCTTTCTTGCAAACTCCGACATGCCACTGAGAATTCAGAGTGA	exon sense-overlapping	ENST00000336769	FAM19A5	family with sequence similarity 19 (chemokine (C-C motif)-like), member A5 [Source:HGNC Symbol;Acc:21592]	+	48885403	49246724	7.35907	29.942	2.91854	4.42618	5	12.0772	5	27.4694	28.614	33.7425	2.46913	3.79055	2.49594	4.2156	4.45744	4.6055
ASHGA5P037112	0.000356266	0.0058213	2.81498	down	noncoding	ENST00000424252	RP4-724E16.2	GENCODE	1947	chr20	+	52169308	52191847		GTTCTCACCCACTGTTTCCATGATCACTCTCACAACAGAAAAATAAAATTGACAAGAAAA	intronic antisense	NM_006526	ZNF217	zinc finger protein 217	-	52183609	52199636	32.2007	149.169	5.38362	6.87674	34.8562	36.1015	25.6445	169.962	135.299	142.247	5.60366	5.21869	5.32851	7.00186	6.85689	6.77148
ASHGA5P029899	0.00155065	0.0124039	3.39249	down	noncoding	uc001zfv.1	DKFZp434L187	UCSC_knowngene	2072	chr15	-	32449488	32635000		GGTGTAATGTTCTTAGGATTCATGCACTACATTTACCCATGTTTCTGGTACTTTGAATTG	natural antisense	NM_000746	CHRNA7	neuronal acetylcholine receptor subunit alpha-7 isoform 1 precursor	+	32322685	32462384	5	26.8841	2.45604	4.21839	5	5	5	36.6705	22.3526	21.6292	2.46913	2.40305	2.49594	4.66515	4.07406	3.91595
ASHGA5P029899	0.00155065	0.0124039	3.39249	down	noncoding	uc001zfv.1	DKFZp434L187	UCSC_knowngene	2072	chr15	-	32449488	32635000		GGTGTAATGTTCTTAGGATTCATGCACTACATTTACCCATGTTTCTGGTACTTTGAATTG	natural antisense	NM_001190455	CHRNA7	neuronal acetylcholine receptor subunit alpha-7 isoform 2 precursor	+	32322685	32462384	5	26.8841	2.45604	4.21839	5	5	5	36.6705	22.3526	21.6292	2.46913	2.40305	2.49594	4.66515	4.07406	3.91595
ASHGA5P039039	0.0387001	0.0939778	3.23403	down	noncoding	ENST00000512398	RP11-319G6.3	GENCODE	273	chr3	+	139185271	139185637		CATGGCTCTGTAAATGGAGGCTGCCATCATCATAATATCATTATGAAGCCCCTGATCTCA	intronic antisense	NM_004164	RBP2	retinol-binding protein 2	-	139171725	139195352	8.5129	36.4778	3.02847	4.72181	5	15.5387	5	44.1774	30.7643	34.4918	2.46913	4.12035	2.49594	4.95367	4.57418	4.63758
ASHGA5P020377	0.00148503	0.0120833	3.98168	down	noncoding	ENST00000512536	LINC00616	GENCODE	568	chr4	-	139019343	139051863		TATGTACCCCCTAGGATATCAAGATTCCTGTAGCAGATTGAGCTCTGGCAGTTGATCTCA	intergenic							17.7799	117.67	4.52354	6.51691	11.0398	26.489	15.8108	128.234	122.332	102.445	4.08061	4.82007	4.66993	6.56514	6.70101	6.28458
ASHGA5P038304	0.00198781	0.0143879	2.33813	down	noncoding	ENST00000497551	RP11-231I13.2	GENCODE	483	chr3	-	70246076	70255942	ENST00000567252	GCCAAACAACATTTTCTTACCTCCAAACTGATACTTCAGTTCATCACAGAGACACTGATG	intergenic							5	18.5994	2.45604	3.6814	5	5	5	15.9087	20.2857	19.604	2.46913	2.40305	2.49594	3.35758	3.92287	3.76374
ASHGA5P030175	0.00125716	0.0110939	2.03637	down	noncoding	TCONS_00009133	XLOC_004108	LincRNAs identified by Cabili et al	598	chr4	-	145122622	145132014		ATCCTTCCCCATGGTACAGCCCCAGAAAGATAAAAGTCTCAGAATAAAACACTGTACATG	intergenic							107.484	306.201	6.95554	7.98154	95.6547	120.504	106.293	328.73	285.614	304.259	6.93296	6.75347	7.1802	8.01553	7.99987	7.92922
ASHGA5P045789	0.0153185	0.0505331	2.10873	down	noncoding	ENST00000419815	RP11-380F14.2	GENCODE	373	chr9	+	86893133	86905046		CTCTCTTGGCCTCCTTTTTCCACCAGCAATGGAAAAGAAAAGAAATAACAATAATAAAGA	natural antisense	NM_001199633	SLC28A3	solute carrier family 28 member 3	-	86890764	86955694	68.3282	217.131	6.37739	7.45376	70.5354	61.7678	72.6813	229.315	226.301	195.778	6.53823	5.9082	6.68573	7.4573	7.65215	7.25184
ASHGA5P045789	0.0153185	0.0505331	2.10873	down	noncoding	ENST00000419815	RP11-380F14.2	GENCODE	373	chr9	+	86893133	86905046		CTCTCTTGGCCTCCTTTTTCCACCAGCAATGGAAAAGAAAAGAAATAACAATAATAAAGA	natural antisense	NM_022127	SLC28A3	solute carrier family 28 member 3	-	86890764	86983413	68.3282	217.131	6.37739	7.45376	70.5354	61.7678	72.6813	229.315	226.301	195.778	6.53823	5.9082	6.68573	7.4573	7.65215	7.25184
ASHGA5P022135	0.000643887	0.00776961	2.53784	down	noncoding	ENST00000550049	RP11-81K13.1	GENCODE	732	chr12	+	75419753	75438573		ATAGTCCTTGCTATTCATCTTTAATTCAATCTTTTCATGGAACTTCCAGAGAAGAAGCCA	natural antisense	NM_001260497	KCNC2	potassium voltage-gated channel subfamily C member 2 isoform 4	-	75433857	75603528	5	20.0706	2.45604	3.79964	5	5	5	17.853	20.4049	21.9539	2.46913	2.40305	2.49594	3.52684	3.93413	3.93796
ASHGA5P022135	0.000643887	0.00776961	2.53784	down	noncoding	ENST00000550049	RP11-81K13.1	GENCODE	732	chr12	+	75419753	75438573		ATAGTCCTTGCTATTCATCTTTAATTCAATCTTTTCATGGAACTTCCAGAGAAGAAGCCA	natural antisense	NM_001260498	KCNC2	potassium voltage-gated channel subfamily C member 2 isoform KV3.2d	-	75433857	75603528	5	20.0706	2.45604	3.79964	5	5	5	17.853	20.4049	21.9539	2.46913	2.40305	2.49594	3.52684	3.93413	3.93796
ASHGA5P022135	0.000643887	0.00776961	2.53784	down	noncoding	ENST00000550049	RP11-81K13.1	GENCODE	732	chr12	+	75419753	75438573		ATAGTCCTTGCTATTCATCTTTAATTCAATCTTTTCATGGAACTTCCAGAGAAGAAGCCA	natural antisense	NM_001260499	KCNC2	potassium voltage-gated channel subfamily C member 2 isoform 6	-	75433857	75603528	5	20.0706	2.45604	3.79964	5	5	5	17.853	20.4049	21.9539	2.46913	2.40305	2.49594	3.52684	3.93413	3.93796
ASHGA5P022135	0.000643887	0.00776961	2.53784	down	noncoding	ENST00000550049	RP11-81K13.1	GENCODE	732	chr12	+	75419753	75438573		ATAGTCCTTGCTATTCATCTTTAATTCAATCTTTTCATGGAACTTCCAGAGAAGAAGCCA	natural antisense	NM_139136	KCNC2	potassium voltage-gated channel subfamily C member 2 isoform KV3.2a	-	75433857	75603528	5	20.0706	2.45604	3.79964	5	5	5	17.853	20.4049	21.9539	2.46913	2.40305	2.49594	3.52684	3.93413	3.93796
ASHGA5P022135	0.000643887	0.00776961	2.53784	down	noncoding	ENST00000550049	RP11-81K13.1	GENCODE	732	chr12	+	75419753	75438573		ATAGTCCTTGCTATTCATCTTTAATTCAATCTTTTCATGGAACTTCCAGAGAAGAAGCCA	natural antisense	NM_139137	KCNC2	potassium voltage-gated channel subfamily C member 2 isoform KV3.2b	-	75433857	75603528	5	20.0706	2.45604	3.79964	5	5	5	17.853	20.4049	21.9539	2.46913	2.40305	2.49594	3.52684	3.93413	3.93796
ASHGA5P022135	0.000643887	0.00776961	2.53784	down	noncoding	ENST00000550049	RP11-81K13.1	GENCODE	732	chr12	+	75419753	75438573		ATAGTCCTTGCTATTCATCTTTAATTCAATCTTTTCATGGAACTTCCAGAGAAGAAGCCA	natural antisense	NM_153748	KCNC2	potassium voltage-gated channel subfamily C member 2 isoform KV3.2c	-	75433857	75603528	5	20.0706	2.45604	3.79964	5	5	5	17.853	20.4049	21.9539	2.46913	2.40305	2.49594	3.52684	3.93413	3.93796
ASHGA5P026352	0.0303611	0.0791962	3.56663	down	noncoding	BF357088		LincRNAs identified by Khalil et al	337	chr5	+	82009427	82009752		GCCTTCTGGTGCAAAATTTCCCATACCCAGAAACCTCTTGAATTGGTCATTATCATAGAA	intergenic							10.6622	57.229	3.5905	5.42506	12.4982	14.4884	5	53.7848	58.5415	59.3607	4.24782	4.02775	2.49594	5.25224	5.56314	5.45982
ASHGA5P036821	0.0111319	0.0413944	3.21938	down	noncoding	TCONS_00026225	XLOC_012600	LincRNAs identified by Cabili et al	555	chr18	+	137412	141924		TAAAATGTGTGTAGGTTTCTAGAAGAAAAGCAATTTATCGTCTTGTTGCTGTGGTTCCCA	intergenic							5.97874	37.5965	3.09896	4.78575	5.87273	5	7.06349	37.2636	40.2529	35.2732	3.26557	2.40305	3.62827	4.69101	4.99324	4.673
ASHGA5P022777	4.64176e-06	0.00106676	5.91827	down	noncoding	NR_034019	LOC100130700	RefSeq	480	chr16	-	34739458	34740840		GGTTGCCATGTTTTTTAGATTAAGTACTGCACGACTACTCGCTTCTGAAACTGTCATAAG	intergenic							5	43.8411	2.45604	5.02122	5	5	5	47.1659	43.9476	40.4098	2.46913	2.40305	2.49594	5.0508	5.12673	4.88613
ASHGA5P023664	1.77662e-05	0.00170548	2.04004	down	noncoding	HMlincRNA136+	HMlincRNA136	LincRNAs identified by Khalil et al	7999	chr1	+	208553827	208561826		AATGACTTGGTGTCCAATGCCTGGATAATTACTGTCACAAATGCGATCAGACGGGTGCTT	intergenic							5	16.4027	2.45604	3.48464	5	5	5	17.9524	14.7126	16.5432	2.46913	2.40305	2.49594	3.53408	3.42284	3.497
ASHGA5P031764	1.91905e-05	0.00170952	6.31785	down	noncoding	ENST00000563826	RP11-883G14.2	GENCODE	437	chr16	+	51051668	51069688		TTTCCTTTTTCCTTCTGCAGAAAACATGCTTTACATAGGATCTCTGAACTTAAAGAATGG	intergenic							5	46.6787	2.45604	5.11547	5	5	5	50.2087	48.738	41.0895	2.46913	2.40305	2.49594	5.15059	5.2849	4.91093
ASHGA5P016036	0.0158522	0.0516363	2.62422	down	noncoding	ENST00000426083	AC007246.3	GENCODE	1438	chr2	+	39663777	39831216		TGCAGTTCAGGATATTATCCATGAGCCTGTGTTTCATGTAATTGTCATGTTTCTTCGGAT	intronic antisense	NM_001270425	MAP4K3	mitogen-activated protein kinase kinase kinase kinase 3 isoform 2	-	39476406	39664453	6.49592	25.8949	2.81168	4.20357	5	9.48776	5	23.7876	26.4425	27.4546	2.46913	3.46996	2.49594	3.99212	4.33704	4.28154
ASHGA5P016036	0.0158522	0.0516363	2.62422	down	noncoding	ENST00000426083	AC007246.3	GENCODE	1438	chr2	+	39663777	39831216		TGCAGTTCAGGATATTATCCATGAGCCTGTGTTTCATGTAATTGTCATGTTTCTTCGGAT	intronic antisense	NM_003618	MAP4K3	mitogen-activated protein kinase kinase kinase kinase 3 isoform 1	-	39476406	39664453	6.49592	25.8949	2.81168	4.20357	5	9.48776	5	23.7876	26.4425	27.4546	2.46913	3.46996	2.49594	3.99212	4.33704	4.28154
ASHGA5P020086	0.00716343	0.0312672	2.0983	down	noncoding	ENST00000507964	CTB-3M24.3	GENCODE	275	chr5	+	132723464	132724241		GCTGCATGAGACAGTGTCTGAGACTCACCTTTGACACAAATGTAACTGAAGGGGAGAAGC	intronic antisense	NM_015082	FSTL4	follistatin-related protein 4 precursor	-	132532151	132948223	5	16.9499	2.45604	3.52526	5	5	5	18.5058	19.3959	12.9481	2.46913	2.40305	2.49594	3.58697	3.85306	3.13575
ASHGA5P039358	0.00485829	0.0244704	2.60511	down	noncoding	ENST00000503815	RP11-608B3.1	GENCODE	534	chr4	-	18489684	18491131		CCTCTGTTATTGAACGTACACAATATTGTAATTAATTGTTTACCTATCTGGCACTCCCAA	intergenic							5.91732	24.3561	2.7199	4.10125	5	7.75197	5	26.8604	21.0661	25.1419	2.46913	3.19464	2.49594	4.17931	3.98453	4.13992
ASHGA5P022172	2.00602e-06	0.000868385	2.75819	down	noncoding	ENST00000551067	CTD-2311B13.1	GENCODE	418	chr14	+	19515340	19519837		GGGCGTTTTTCTTTCATGGTTCATCCATATGGCTCCAAATGAAAATTACATTAATTATGG	intergenic							5	21.5901	2.45604	3.91976	5	5	5	23.1384	19.6714	21.9607	2.46913	2.40305	2.49594	3.94502	3.87616	3.93811
ASHGA5P038712	0.000111558	0.00345962	7.90018	down	noncoding	ENST00000438418	AC144521.1	GENCODE	919	chr3	+	18504171	18505831		GTTGATGGCAGTTATGTCAGGTTAGTAGCACAATAGTTTCTTTTCTCATTTTCTCACATT	intergenic							5.51858	65.6504	2.65243	5.63432	5	6.55575	5	62.6302	69.0414	65.2796	2.46913	2.99222	2.49594	5.48071	5.8217	5.60053
ASHGA5P037415	0.00099905	0.00974621	2.47388	down	noncoding	ENST00000456917	MIR155HG	GENCODE	1600	chr21	+	26934220	26947480		ACTACCCGGGCGCTGGGCTTTTTCGACTTTTCCTTTAAAAAGAAAAAAGTTTTTCAAGCT	intergenic							5	19.5914	2.45604	3.76281	5	5	5	17.4059	21.2783	20.09	2.46913	2.40305	2.49594	3.48717	3.99961	3.80167
ASHGA5P016708	0.000201225	0.00442675	2.20878	down	noncoding	ENST00000433265	CTC-338M12.3	GENCODE	311	chr5	+	180690634	180691230		TGTGCCAAACTGCCATCCTGCAGCCACCAGAACCTTCCACATGAAATGAAAGGCTCACCA	intergenic							310.567	832.942	8.33763	9.48088	300.919	356.417	274.365	853.843	792.362	852.621	8.42858	8.16693	8.41739	9.44566	9.51688	9.48011
ASHGA5P016498	0.00728284	0.0315783	6.25375	down	noncoding	ENST00000430978	LINC00454	GENCODE	563	chr13	-	114582225	114586528		GTCACTCAAGCACTCATAATCCAGGTTCAGTTTCTGCCAGCACTAATTTGGTTTATTCCA	intergenic							8.26544	66.3594	3.00625	5.65097	5	14.7963	5	70.0039	64.0468	65.0275	2.46913	4.05367	2.49594	5.65138	5.70671	5.59482
ASHGA5P029549	0.00765419	0.0326634	3.11532	down	noncoding	ENST00000554055	RP11-841O20.2	GENCODE	581	chr14	+	53107556	53108284		GAGCCAGTAGAAGGTGACAAAGTAGAGGTAAGAATATTCCTTCAAAAAGATTGGCAGCTA	natural antisense	ENST00000395686	ERO1L	ERO1-like (S. cerevisiae) [Source:HGNC Symbol;Acc:13280]	-	53106633	53162423	712.959	2581.98	9.41858	11.058	507.179	972.359	659.339	2839.87	3157	1749.08	9.123	9.54036	9.59238	11.1844	11.493	10.4964
ASHGA5P028369	0.00205016	0.014629	2.07445	down	noncoding	ENST00000543922	RP11-158L12.5	GENCODE	585	chr12	+	125634603	125635940		AGGATATAGGGCTGGGTCAATGTAATCAGGATTCAACATCTCTCATGGCATCTGTATGGG	intergenic							9.2618	37.9047	3.74844	4.80117	8.7014	9.9092	9.17479	37.7736	39.3874	36.5533	3.76681	3.52389	3.95461	4.7122	4.95924	4.73206
ASHGA5P032563	0.000119231	0.00354169	2.13161	down	noncoding	ENST00000576014	RP11-166P13.4	GENCODE	4281	chr17	-	55169505	55173786		GTCAAACTGCTTTTTCATCCCTCTTCAGCTTCTGTGTCATCACAGTAAAGAATTCTCACC	intronic antisense	NM_001242902	AKAP1	A-kinase anchor protein 1, mitochondrial precursor	+	55163134	55198705	93.0754	282.669	6.76399	7.85594	83.1138	111.903	84.2097	292.604	270.125	285.277	6.74356	6.65914	6.88928	7.82735	7.91516	7.82531
ASHGA5P032563	0.000119231	0.00354169	2.13161	down	noncoding	ENST00000576014	RP11-166P13.4	GENCODE	4281	chr17	-	55169505	55173786		GTCAAACTGCTTTTTCATCCCTCTTCAGCTTCTGTGTCATCACAGTAAAGAATTCTCACC	intronic antisense	NM_001242903	AKAP1	A-kinase anchor protein 1, mitochondrial precursor	+	55163077	55198705	93.0754	282.669	6.76399	7.85594	83.1138	111.903	84.2097	292.604	270.125	285.277	6.74356	6.65914	6.88928	7.82735	7.91516	7.82531
ASHGA5P032563	0.000119231	0.00354169	2.13161	down	noncoding	ENST00000576014	RP11-166P13.4	GENCODE	4281	chr17	-	55169505	55173786		GTCAAACTGCTTTTTCATCCCTCTTCAGCTTCTGTGTCATCACAGTAAAGAATTCTCACC	intronic antisense	NM_003488	AKAP1	A-kinase anchor protein 1, mitochondrial precursor	+	55162552	55198710	93.0754	282.669	6.76399	7.85594	83.1138	111.903	84.2097	292.604	270.125	285.277	6.74356	6.65914	6.88928	7.82735	7.91516	7.82531
ASHGA5P021699	0.00108729	0.0101149	4.95198	down	noncoding	ENST00000538559	RMST	GENCODE	2598	chr12	+	97825430	97958793		ATCATAAAAGTATTGCTAAACAATCAAATGCAAGGTATTTTGTCTTCTTTCACTCCTTAA	intergenic							5.92423	51.775	2.96508	5.27309	5	7.23341	5.53929	48.2168	53.1996	53.9086	2.46913	3.10639	3.31973	5.08406	5.41799	5.31721
ASHGA5P058281	0.0391806	0.0947823	2.16606	down	noncoding	TCONS_00029159	XLOC_014103	LincRNAs identified by Cabili et al	1025	chr21	-	44808522	44809763		TAAACCGCCTGTTGTTGTCTAAACGTATATCCGTGTATGTAAACCGCCTGTTCTCTAAAC	intergenic							7.26816	27.7665	3.19369	4.30876	5	10.1398	6.66466	29.3165	23.8298	30.1532	2.46913	3.56142	3.55053	4.3237	4.17813	4.42446
ASHGA5P027669	0.00251778	0.0165229	2.16054	down	noncoding	EF565112		LincRNAs identified by Khalil et al	652	chrX	-	115944898	115951828		AGGAAGCTCTTGCCCAAAAACATGAGGAGTCAGCAGAAGAGAAGTCACATTTCCTTTTTT	intergenic							5.48574	19.4213	2.64631	3.75771	5	6.45722	5	20.355	18.5861	19.3229	2.46913	2.97387	2.49594	3.74126	3.79016	3.7417
ASHGA5P000486	0.00588825	0.0276234	2.08985	down	noncoding	chr6:91443800-91462575+	chr6:91443800-91462575	LincRNAs identified by Khalil et al	18775	chr6	+	91387079	91405854		TGGCAGCTTTCTGTGGAACACTTCTGACCCATGTAATCCTAGAAAACTCTACCATCCAGT	intergenic							10.2522	39.6328	3.80611	4.8695	9.0742	15.2433	6.43894	36.934	41.2692	40.6951	3.81992	4.092	3.5064	4.67704	5.03569	4.89578
ASHGA5P023810	0.00978924	0.038048	2.23206	down	noncoding	HMlincRNA51+	HMlincRNA51	LincRNAs identified by Khalil et al	6118	chr2	+	224986097	224992215		GCTGCCCAAATCTAACCCTTCTTGTCAGTATTGCCACATCTTGTGATTTGTCAAGACAAG	intergenic							24.1109	88.954	4.94151	6.09989	14.6224	33.6439	24.0665	96.4232	85.4753	84.9635	4.45629	5.12687	5.24138	6.14491	6.15616	5.9986
ASHGA5P040948	0.023134	0.0661609	2.26494	down	noncoding	ENST00000514569	CTD-2194D22.4	GENCODE	1635	chr5	+	1887445	1900607		ACCCATTTTCCCCAACCAATTTGCTTTGGAGCAAGTTCAGGGTATCATATCTGTAAAAAA	bidirectional	ENST00000505790	IRX4	iroquois homeobox 4 [Source:HGNC Symbol;Acc:6129]	-	1877561	1887332	11.4781	48.702	4.00046	5.17993	9.38496	9.90341	15.1459	48.1163	45.2087	52.781	3.86164	3.52234	4.6174	5.07969	5.17041	5.2897
ASHGA5P040948	0.023134	0.0661609	2.26494	down	noncoding	ENST00000514569	CTD-2194D22.4	GENCODE	1635	chr5	+	1887445	1900607		ACCCATTTTCCCCAACCAATTTGCTTTGGAGCAAGTTCAGGGTATCATATCTGTAAAAAA	bidirectional	ENST00000513692	IRX4	iroquois homeobox 4 [Source:HGNC Symbol;Acc:6129]	-	1877927	1887350	11.4781	48.702	4.00046	5.17993	9.38496	9.90341	15.1459	48.1163	45.2087	52.781	3.86164	3.52234	4.6174	5.07969	5.17041	5.2897
ASHGA5P020933	0.0249011	0.069413	2.56857	down	noncoding	ENST00000522213	RP11-211C9.1	GENCODE	666	chr8	-	8581202	8639989		CAAGACTCCTGACAAGCTGATCTGATTTATCTTCCTATGTATCTGATGAATGGTTTATCC	intergenic							5.09085	24.3595	2.70978	4.07075	5	5	5.27255	29.5641	26.7707	16.7437	2.46913	2.40305	3.25716	4.33781	4.35479	3.51965
ASHGA5P028378	8.78996e-05	0.00311909	3.53412	down	noncoding	ENST00000535544	RP11-173C20.1	GENCODE	2815	chr12	+	127226210	127230798		GTGATGGGTAGACCTCAGTTTGTATGCATTGTGTTAATTACTATTTCTTTGCTTTTCCTT	intergenic							5	27.2072	2.45604	4.27739	5	5	5	28.1254	29.005	24.4913	2.46913	2.40305	2.49594	4.25413	4.47847	4.09957
ASHGA5P053787	0.00313738	0.0186332	2.16285	down	noncoding	ENST00000418656	RP11-508N12.2	GENCODE	504	chr9	-	109864324	109865153		AACTTACAACCACAAGGTGAGCCCTTCTTACTAGAAGTTCTCTTCGTGTCTCCTGGTGTT	intergenic							17.6912	68.8308	4.59201	5.70495	14.1344	20.2	18.739	65.9355	65.291	75.2658	4.41068	4.45987	4.90549	5.55835	5.73938	5.81712
ASHGA5P045867	0.0002301	0.00470965	3.72865	down	noncoding	ENST00000562653	RP11-546O6.4	GENCODE	1728	chr9	+	100505489	100507217		TCTCATGTTATCCCTTCATAAACACTACAGCCCAATAAAGAAACACAGTTCAGCATCCTG	intergenic							5	28.6327	2.45604	4.3547	5	5	5	24.8439	30.0431	31.0112	2.46913	2.40305	2.49594	4.05984	4.53198	4.47227
ASHGA5P019523	0.000464451	0.00662338	2.1113	down	noncoding	ENST00000489488	RP4-798C17.6	GENCODE	460	chr7	-	143949388	144052693		GAAGTTTCAGTCTTCCTCCAGACAGGCACGCCATACAACCGACTACACTTGGGCTCACTG	intron sense-overlapping	NM_001005328	OR2A7	olfactory receptor 2A7	-	143955788	143956721	120.262	339.126	7.05607	8.1342	91.8712	166.885	102.031	336.564	327.224	353.589	6.87204	7.16707	7.12909	8.05619	8.20899	8.13742
ASHGA5P019523	0.000464451	0.00662338	2.1113	down	noncoding	ENST00000489488	RP4-798C17.6	GENCODE	460	chr7	-	143949388	144052693		GAAGTTTCAGTCTTCCTCCAGACAGGCACGCCATACAACCGACTACACTTGGGCTCACTG	intron sense-overlapping	NM_198495	CTAGE4	cutaneous T-cell lymphoma-associated antigen 4	-	143963766	143966392	120.262	339.126	7.05607	8.1342	91.8712	166.885	102.031	336.564	327.224	353.589	6.87204	7.16707	7.12909	8.05619	8.20899	8.13742
ASHGA5P019523	0.000464451	0.00662338	2.1113	down	noncoding	ENST00000489488	RP4-798C17.6	GENCODE	460	chr7	-	143949388	144052693		GAAGTTTCAGTCTTCCTCCAGACAGGCACGCCATACAACCGACTACACTTGGGCTCACTG	intronic antisense	NM_001001802	OR2A42	olfactory receptor 2A1/2A42	+	144015217	144016150	120.262	339.126	7.05607	8.1342	91.8712	166.885	102.031	336.564	327.224	353.589	6.87204	7.16707	7.12909	8.05619	8.20899	8.13742
ASHGA5P019523	0.000464451	0.00662338	2.1113	down	noncoding	ENST00000489488	RP4-798C17.6	GENCODE	460	chr7	-	143949388	144052693		GAAGTTTCAGTCTTCCTCCAGACAGGCACGCCATACAACCGACTACACTTGGGCTCACTG	intronic antisense	NM_001005287	OR2A1	olfactory receptor 2A1/2A42	+	144015217	144016150	120.262	339.126	7.05607	8.1342	91.8712	166.885	102.031	336.564	327.224	353.589	6.87204	7.16707	7.12909	8.05619	8.20899	8.13742
ASHGA5P019523	0.000464451	0.00662338	2.1113	down	noncoding	ENST00000489488	RP4-798C17.6	GENCODE	460	chr7	-	143949388	144052693		GAAGTTTCAGTCTTCCTCCAGACAGGCACGCCATACAACCGACTACACTTGGGCTCACTG	natural antisense	NM_005435	ARHGEF5	rho guanine nucleotide exchange factor 5	+	144052488	144077725	120.262	339.126	7.05607	8.1342	91.8712	166.885	102.031	336.564	327.224	353.589	6.87204	7.16707	7.12909	8.05619	8.20899	8.13742
ASHGA5P018995	0.00396838	0.0215952	2.08315	down	noncoding	ENST00000463642	RP11-298O21.6	GENCODE	457	chr3	+	167582560	167594705		TCCCACTTCCTGGAGAATTATCCCTCTGTAGGCAAGAAGAAGTCTTTATTCTCTTCGGAA	intergenic							17.2259	63.3514	4.51703	5.5758	11.8394	23.2685	16.5696	65.821	57.4941	66.7391	4.17169	4.64565	4.73376	5.5566	5.53179	5.63902
ASHGA5P041081	0.000501616	0.00687462	2.59768	down	noncoding	TCONS_00022028	XLOC_010624	LincRNAs identified by Cabili et al	793	chr13	-	53673549	53704701		TAAACACATATTATGCACCTCTTATGTCTTCTTTTTCCTTAAACCTTTCTACCTACTGAC	intergenic							31.2829	130.981	5.30798	6.6852	30.5593	42.2993	20.99	129.782	128.779	134.381	5.43045	5.42752	5.06597	6.58639	6.78368	6.68553
ASHGA5P038123	0.0292466	0.0773021	3.47853	down	noncoding	ENST00000424242	AC090952.5	GENCODE	446	chr3	-	14689700	14690939		ATCTTAACCTTTGTTCTATCTTCAACACCGCTGGCTCTAACAAATTACTCAGCAGTGAAT	intergenic							7.12372	42.3483	3.15731	4.95579	5	5.89943	10.4717	34.4352	49.2319	43.3779	2.46913	2.87714	4.12567	4.57409	5.30032	4.99295
ASHGA5P046187	0.00315901	0.0187165	2.24585	down	noncoding	uc004dqd.3	BC094793	UCSC_knowngene	3849	chrX	-	52108069	52111918		TCCTCTGTAATTACATATTTCGTGGTAGCCTTTGTGGCCCATATCAAAGACCACGTTTTT	bidirectional	NM_130777	XAGE2	G antigen family D member 3	+	52112077	52118822	5	17.9746	2.45604	3.62331	5	5	5	16.7228	21.1077	16.0934	2.46913	2.40305	2.49594	3.42848	3.98672	3.45472
ASHGA5P057819	0.000106168	0.00339562	2.75131	down	noncoding	TCONS_00022189	XLOC_010411	LincRNAs identified by Cabili et al	259	chr13	+	64201007	64209643	TCONS_00021811, TCONS_00022190	CTTTAATCTGAGAATCTTACGTCTTCAAGCCCTGTTCACACCGCTTGTCCCATTAGAATA	intergenic							25.8954	119.937	5.08879	6.54891	21.6012	32.5615	23.5236	120.213	120.605	118.993	4.97334	5.08432	5.20871	6.46703	6.68146	6.49823
ASHGA5P038485	0.00151208	0.0122095	3.03543	down	noncoding	ENST00000426775	RP3-333A15.1	GENCODE	749	chr1	+	71413061	71417176		GTATCAAAGTCAGGAGCAATTTCTTCTGTTCCCTGTATTTCAATATCTTTGCCTTTTACT	intronic antisense	NM_198714	PTGER3	prostaglandin E2 receptor EP3 subtype isoform 4	-	71318035	71513491	20.9999	103.898	4.72769	6.32959	16.9427	33.0935	12.9635	113.259	99.7388	98.6962	4.65624	5.10622	4.4206	6.37544	6.38466	6.22867
ASHGA5P038485	0.00151208	0.0122095	3.03543	down	noncoding	ENST00000426775	RP3-333A15.1	GENCODE	749	chr1	+	71413061	71417176		GTATCAAAGTCAGGAGCAATTTCTTCTGTTCCCTGTATTTCAATATCTTTGCCTTTTACT	intronic antisense	NM_198716	PTGER3	prostaglandin E2 receptor EP3 subtype isoform 6	-	71318035	71513491	20.9999	103.898	4.72769	6.32959	16.9427	33.0935	12.9635	113.259	99.7388	98.6962	4.65624	5.10622	4.4206	6.37544	6.38466	6.22867
ASHGA5P038485	0.00151208	0.0122095	3.03543	down	noncoding	ENST00000426775	RP3-333A15.1	GENCODE	749	chr1	+	71413061	71417176		GTATCAAAGTCAGGAGCAATTTCTTCTGTTCCCTGTATTTCAATATCTTTGCCTTTTACT	intronic antisense	NM_198717	PTGER3	prostaglandin E2 receptor EP3 subtype isoform 7	-	71318035	71513491	20.9999	103.898	4.72769	6.32959	16.9427	33.0935	12.9635	113.259	99.7388	98.6962	4.65624	5.10622	4.4206	6.37544	6.38466	6.22867
ASHGA5P000407	0.00107642	0.010075	2.76061	down	noncoding	chr4:103259950-103278600-	chr4:103259950-103278600	LincRNAs identified by Khalil et al	18650	chr4	-	103040927	103059577		GTTGTCAGCCAAAATGAAGTAGATAAATCAAGATCTAGATACCCTCACACTTTCTCTCCT	intergenic							15.5831	76.1505	4.39734	5.86232	11.7281	20.7183	14.303	70.846	82.0314	75.5741	4.15847	4.49099	4.54254	5.66835	6.09561	5.823
ASHGA5P040232	0.000734285	0.00826816	4.47904	down	noncoding	ENST00000509956	RP11-6E9.5	GENCODE	449	chr4	+	170867131	170884485		GCAGCAACCAGAATAACTAGATGATTACTCTTCTCTTCATGTGGTCAAAGTATTTATAGT	intergenic							5.79884	39.5939	2.70055	4.86374	5	7.39652	5	42.9359	39.7286	36.1171	2.46913	3.13659	2.49594	4.90691	4.97276	4.71156
ASHGA5P017258	0.0357347	0.0887912	2.19502	down	noncoding	ENST00000439413	RP11-745C15.2	GENCODE	481	chr7	+	54827117	54872621		CCTCCATTAGTCAGAAGATTGAACATGTTGTAACTGTAGAAAGCCCGTCATCCTTGTGTA	intronic antisense	ENST00000415949	SEC61G	Sec61 gamma subunit [Source:HGNC Symbol;Acc:18277]	-	54819945	54827667	6.81203	26.9907	3.13222	4.26645	5	8.12195	7.31412	29.688	27.0864	24.1977	2.46913	3.2583	3.66922	4.34434	4.37409	4.08092
ASHGA5P041225	0.00140591	0.0117371	3.18538	down	noncoding	TCONS_00020622	XLOC_009934	LincRNAs identified by Cabili et al	354	chr12	+	126526981	126528006	TCONS_00020617, TCONS_00020621	ATAGCAGCATGCATACTTGGGGCTGCATTTGAAGGAGAGCAACATCCCTTTGTTTTCACA	intergenic							5	25.1559	2.45604	4.12751	5	5	5	22.9316	20.0182	32.5179	2.46913	2.40305	2.49594	3.93138	3.90303	4.54811
ASHGA5P050661	7.48302e-06	0.00127044	2.88629	down	noncoding	NR_036499	LOC389043	RefSeq	3063	chr2	+	132160473	132165801		CCATCTGAAGGTACTGTAGAAATTCAGTTACTCACCCTTGCAAGCATAAGGATTCCAGAT	intergenic							5	22.504	2.45604	3.98526	5	5	5	24.9637	20.8047	21.7436	2.46913	2.40305	2.49594	4.06844	3.96337	3.92396
ASHGA5P028910	0.0450252	0.104517	2.11142	down	noncoding	ENST00000339009	UBAC2-IT1	GENCODE	444	chr13	+	99970407	99971209		GTTTGTGCTTTCAAGGTAATTTTGATGAAAGTTTTAGCTGGGCTTGTCAGTGTTGTTTTT	intron sense-overlapping	NM_001144072	UBAC2	ubiquitin-associated domain-containing protein 2 isoform 1 precursor	+	99852678	100038753	131.578	364.335	7.13087	8.20909	156.935	167.74	70.0605	374.091	443.773	275.14	7.58175	7.17329	6.63759	8.21077	8.65136	7.76514
ASHGA5P028910	0.0450252	0.104517	2.11142	down	noncoding	ENST00000339009	UBAC2-IT1	GENCODE	444	chr13	+	99970407	99971209		GTTTGTGCTTTCAAGGTAATTTTGATGAAAGTTTTAGCTGGGCTTGTCAGTGTTGTTTTT	intron sense-overlapping	NM_177967	UBAC2	ubiquitin-associated domain-containing protein 2 isoform 2	+	99853162	100038753	131.578	364.335	7.13087	8.20909	156.935	167.74	70.0605	374.091	443.773	275.14	7.58175	7.17329	6.63759	8.21077	8.65136	7.76514
ASHGA5P027508	0.00644025	0.029298	2.48142	down	noncoding	ENST00000547515	RP11-541G9.2	GENCODE	576	chr12	-	97666469	97669987		AAGACATCTGTTCCTCTCATCCTTTAGTGAAGTGCAGATGGAGATTCCTACATGGTTTTG	intergenic							9.19973	43.7748	3.69921	5.01037	5.99131	11.2163	10.3915	49.6009	36.935	44.7884	3.28827	3.69443	4.11492	5.13011	4.86175	5.03925
ASHGA5P032529	0.00379981	0.0209676	2.23929	down	noncoding	ENST00000504307	HILS1	GENCODE	1219	chr17	-	48248788	48258539		GCCCCATCTCCTGGCAGGATTTTCTATCACCGGAATACAGTAGATTTTCCCTCCTTTTTT	intronic antisense	NM_000023	SGCA	alpha-sarcoglycan isoform 1 precursor	+	48243365	48253293	503.609	1276.85	8.92098	10.084	330.389	741.694	438.742	1272.13	1166.56	1391.84	8.55174	9.1663	9.04492	10.0297	10.0542	10.1682
ASHGA5P032529	0.00379981	0.0209676	2.23929	down	noncoding	ENST00000504307	HILS1	GENCODE	1219	chr17	-	48248788	48258539		GCCCCATCTCCTGGCAGGATTTTCTATCACCGGAATACAGTAGATTTTCCCTCCTTTTTT	intronic antisense	NM_001135697	SGCA	alpha-sarcoglycan isoform 2 precursor	+	48243365	48253293	503.609	1276.85	8.92098	10.084	330.389	741.694	438.742	1272.13	1166.56	1391.84	8.55174	9.1663	9.04492	10.0297	10.0542	10.1682
ASHGA5P043649	0.00451399	0.0234685	2.05439	down	noncoding	ENST00000443714	AC073325.1	GENCODE	542	chr7	+	45500310	45581781		CAGACACCTTTGGTTCATCTTCGGTTCTGGCCTTAACGGAAAAGCATTCACTGTTTCATA	intergenic							5	16.702	2.45604	3.49475	5	5	5	21.7501	13.6152	14.7407	2.46913	2.40305	2.49594	3.85114	3.30654	3.32658
ASHGA5P040088	0.000119798	0.00354781	3.81456	down	noncoding	ENST00000505122	RP11-700N1.1	GENCODE	570	chr4	+	120860694	120885376		TCCTAATCCCATGCATCTGTGTTTGAGAAAATCTTCCCAAGTGATAGATCTTCTATTTTC	intergenic							63.3777	345.228	6.2307	8.16221	47.0638	86.5597	56.5095	338.888	340.932	355.863	5.99848	6.33608	6.35754	8.06835	8.26913	8.14916
ASHGA5P055077	0.00111476	0.0102288	3.73652	down	noncoding	ENST00000577699	RP11-201M22.1	GENCODE	452	chr11	+	91527527	91533516		CTCAGAGATAAGTACAACTATTCTGTCATCTAATCTGCTAACTCCTACATTATCAATACG	intergenic							6.09346	47.1425	3.21892	5.12061	6.64494	5.55345	6.082	51.4627	38.7513	51.2135	3.41671	2.80629	3.43376	5.18714	4.93306	5.24164
ASHGA5P023597	0.00259986	0.0168069	2.34475	down	noncoding	HMlincRNA100-	HMlincRNA100	LincRNAs identified by Khalil et al	6007	chr1	-	199656882	199662889		GGTCTTTAAACACGGTAGCTTTTTCTGACCTAGATTCTAGACTACCGCTTCCATGTTTTA	intergenic							5	18.7483	2.45604	3.68548	5	5	5	17.6479	22.0352	16.5617	2.46913	2.40305	2.49594	3.50872	4.04894	3.49877
ASHGA5P020836	0.0496516	0.112091	2.65517	down	noncoding	ENST00000520575	KB-1043D8.6	GENCODE	382	chr8	+	97247654	97250262		TGCCTTCTGGTCAGTCCTGTATACAGCACTAAAGCTGATGAATGATCTATCTTACACTAG	natural antisense	NM_001199975	UQCRB	cytochrome b-c1 complex subunit 7 isoform 2	-	97238903	97247862	8.27415	36.9302	3.34288	4.75168	5	8.65387	11.1686	41.6575	33.2085	35.9247	2.46913	3.34729	4.21222	4.86105	4.69101	4.70298
ASHGA5P020836	0.0496516	0.112091	2.65517	down	noncoding	ENST00000520575	KB-1043D8.6	GENCODE	382	chr8	+	97247654	97250262		TGCCTTCTGGTCAGTCCTGTATACAGCACTAAAGCTGATGAATGATCTATCTTACACTAG	natural antisense	NM_001254752	UQCRB	cytochrome b-c1 complex subunit 7 isoform 3	-	97238903	97247862	8.27415	36.9302	3.34288	4.75168	5	8.65387	11.1686	41.6575	33.2085	35.9247	2.46913	3.34729	4.21222	4.86105	4.69101	4.70298
ASHGA5P020836	0.0496516	0.112091	2.65517	down	noncoding	ENST00000520575	KB-1043D8.6	GENCODE	382	chr8	+	97247654	97250262		TGCCTTCTGGTCAGTCCTGTATACAGCACTAAAGCTGATGAATGATCTATCTTACACTAG	natural antisense	NM_006294	UQCRB	cytochrome b-c1 complex subunit 7 isoform 1	-	97238903	97247862	8.27415	36.9302	3.34288	4.75168	5	8.65387	11.1686	41.6575	33.2085	35.9247	2.46913	3.34729	4.21222	4.86105	4.69101	4.70298
ASHGA5P032732	0.000179965	0.00422436	3.86255	down	noncoding	ENST00000574080	RP11-388C12.2	GENCODE	2450	chr17	-	80631872	80634364		GTTGTTGCGTTTTCTAGTTTGTCCAGTGTTGATAGTCACAAAATAAGAAAGATCTTGGAC	intron sense-overlapping	NM_006822	RAB40B	ras-related protein Rab-40B	-	80614942	80656598	5	29.7684	2.45604	4.4056	5	5	5	35.5584	28.6823	25.0645	2.46913	2.40305	2.49594	4.62108	4.46063	4.13508
ASHGA5P023879	4.7125e-06	0.00106676	2.88751	down	noncoding	HMlincRNA815-	HMlincRNA815	LincRNAs identified by Khalil et al	8467	chr9	-	81923716	81932183		GTCTCTTATATCACTGCCCTTTAATACGCTACCCTTAAGAACACAAACAACAATATATTG	intergenic							17.6647	90.0073	4.58472	6.11454	16.0943	21.9588	14.941	100.609	81.3536	88.0594	4.58755	4.5666	4.60002	6.20244	6.08331	6.05789
ASHGA5P018447	0.00615574	0.0284447	2.40448	down	noncoding	ENST00000453666	RP11-325F22.5	GENCODE	640	chr7	-	104558006	104567077		ATATTCCCTGCTGACTTATATAAGTTATTAGTCTTCTAGAAGGATCACAAGGAACCAGCA	intergenic							5.87027	30.5246	3.17926	4.44499	6.17831	5.29522	6.13727	36.2131	24.8408	30.5198	3.32711	2.76533	3.44535	4.64579	4.24491	4.44426
ASHGA5P014508	0.00455337	0.0235551	2.85863	down	noncoding	NR_037673	SERF2-C15ORF63	RefSeq	1794	chr15	+	44084173	44094769		AGATGACGGGCTTTCTGCTGCCGCCCGCAAGCAGAGCTTCTAGAACTGGAGCAGAAAGAA	exon sense-overlapping	NM_001018108	SERF2	small EDRK-rich factor 2 isoform c	+	44084039	44088287	4814.8	15371.2	12.18	13.6953	4485.03	6440.3	3519.07	13541	12559	20013.5	12.186	12.3657	11.9882	13.4918	13.4201	14.174
ASHGA5P014508	0.00455337	0.0235551	2.85863	down	noncoding	NR_037673	SERF2-C15ORF63	RefSeq	1794	chr15	+	44084173	44094769		AGATGACGGGCTTTCTGCTGCCGCCCGCAAGCAGAGCTTCTAGAACTGGAGCAGAAAGAA	exon sense-overlapping	NM_001199875	SERF2	small EDRK-rich factor 2 isoform a	+	44084173	44088287	4814.8	15371.2	12.18	13.6953	4485.03	6440.3	3519.07	13541	12559	20013.5	12.186	12.3657	11.9882	13.4918	13.4201	14.174
ASHGA5P014508	0.00455337	0.0235551	2.85863	down	noncoding	NR_037673	SERF2-C15ORF63	RefSeq	1794	chr15	+	44084173	44094769		AGATGACGGGCTTTCTGCTGCCGCCCGCAAGCAGAGCTTCTAGAACTGGAGCAGAAAGAA	exon sense-overlapping	NM_001199876	SERF2	small EDRK-rich factor 2 isoform b	+	44084173	44088287	4814.8	15371.2	12.18	13.6953	4485.03	6440.3	3519.07	13541	12559	20013.5	12.186	12.3657	11.9882	13.4918	13.4201	14.174
ASHGA5P014508	0.00455337	0.0235551	2.85863	down	noncoding	NR_037673	SERF2-C15ORF63	RefSeq	1794	chr15	+	44084173	44094769		AGATGACGGGCTTTCTGCTGCCGCCCGCAAGCAGAGCTTCTAGAACTGGAGCAGAAAGAA	exon sense-overlapping	NM_001199877	SERF2	small EDRK-rich factor 2 isoform c	+	44069293	44088287	4814.8	15371.2	12.18	13.6953	4485.03	6440.3	3519.07	13541	12559	20013.5	12.186	12.3657	11.9882	13.4918	13.4201	14.174
ASHGA5P014508	0.00455337	0.0235551	2.85863	down	noncoding	NR_037673	SERF2-C15ORF63	RefSeq	1794	chr15	+	44084173	44094769		AGATGACGGGCTTTCTGCTGCCGCCCGCAAGCAGAGCTTCTAGAACTGGAGCAGAAAGAA	exon sense-overlapping	NM_001199878	SERF2	small EDRK-rich factor 2 isoform d	+	44084574	44088287	4814.8	15371.2	12.18	13.6953	4485.03	6440.3	3519.07	13541	12559	20013.5	12.186	12.3657	11.9882	13.4918	13.4201	14.174
ASHGA5P014508	0.00455337	0.0235551	2.85863	down	noncoding	NR_037673	SERF2-C15ORF63	RefSeq	1794	chr15	+	44084173	44094769		AGATGACGGGCTTTCTGCTGCCGCCCGCAAGCAGAGCTTCTAGAACTGGAGCAGAAAGAA	exon sense-overlapping	NM_001199885	C15orf63	huntingtin-interacting protein K isoform 2	+	44092618	44094769	4814.8	15371.2	12.18	13.6953	4485.03	6440.3	3519.07	13541	12559	20013.5	12.186	12.3657	11.9882	13.4918	13.4201	14.174
ASHGA5P014508	0.00455337	0.0235551	2.85863	down	noncoding	NR_037673	SERF2-C15ORF63	RefSeq	1794	chr15	+	44084173	44094769		AGATGACGGGCTTTCTGCTGCCGCCCGCAAGCAGAGCTTCTAGAACTGGAGCAGAAAGAA	exon sense-overlapping	NM_016400	C15orf63	huntingtin-interacting protein K isoform 1	+	44092618	44094769	4814.8	15371.2	12.18	13.6953	4485.03	6440.3	3519.07	13541	12559	20013.5	12.186	12.3657	11.9882	13.4918	13.4201	14.174
ASHGA5P014508	0.00455337	0.0235551	2.85863	down	noncoding	NR_037673	SERF2-C15ORF63	RefSeq	1794	chr15	+	44084173	44094769		AGATGACGGGCTTTCTGCTGCCGCCCGCAAGCAGAGCTTCTAGAACTGGAGCAGAAAGAA	intronic antisense	NM_001258031	SERINC4	serine incorporator 4 isoform 1	-	44086371	44092295	4814.8	15371.2	12.18	13.6953	4485.03	6440.3	3519.07	13541	12559	20013.5	12.186	12.3657	11.9882	13.4918	13.4201	14.174
ASHGA5P014508	0.00455337	0.0235551	2.85863	down	noncoding	NR_037673	SERF2-C15ORF63	RefSeq	1794	chr15	+	44084173	44094769		AGATGACGGGCTTTCTGCTGCCGCCCGCAAGCAGAGCTTCTAGAACTGGAGCAGAAAGAA	intronic antisense	NM_001258032	SERINC4	serine incorporator 4 isoform 3	-	44086371	44092295	4814.8	15371.2	12.18	13.6953	4485.03	6440.3	3519.07	13541	12559	20013.5	12.186	12.3657	11.9882	13.4918	13.4201	14.174
ASHGA5P029889	0.00165105	0.0128608	2.67313	down	noncoding	ENST00000560740	RP11-680F8.4	GENCODE	1346	chr15	-	30020389	30021735		CAGCCCCCTCAGTTTATCTCAGTGTGCCATACAAATAATATTTTCTCTGGATGTTACAGT	intron sense-overlapping	NM_003257	TJP1	tight junction protein ZO-1 isoform a	-	29992356	30114706	731.291	2284.97	9.49414	10.9127	750.936	791.013	651.924	2421.94	2499.66	1933.3	9.65186	9.25206	9.57851	10.9611	11.1312	10.6457
ASHGA5P029889	0.00165105	0.0128608	2.67313	down	noncoding	ENST00000560740	RP11-680F8.4	GENCODE	1346	chr15	-	30020389	30021735		CAGCCCCCTCAGTTTATCTCAGTGTGCCATACAAATAATATTTTCTCTGGATGTTACAGT	intron sense-overlapping	NM_175610	TJP1	tight junction protein ZO-1 isoform b	-	29992356	30114706	731.291	2284.97	9.49414	10.9127	750.936	791.013	651.924	2421.94	2499.66	1933.3	9.65186	9.25206	9.57851	10.9611	11.1312	10.6457
ASHGA5P043778	0.001259	0.0110939	2.33747	down	noncoding	ENST00000445784	AC002064.5	GENCODE	733	chr7	+	89941809	89951906		CCATCTTTGGGTTAATGTTGGCTTCCTTCTAAAATGAATTGGCTCAATTTCTCTGTTGAG	intergenic							22.327	89.4364	4.88482	6.10977	16.6621	28.873	21.446	94.0833	89.6311	84.5948	4.63357	4.92808	5.09281	6.10615	6.23142	5.99172
ASHGA5P039674	0.000123419	0.00358719	3.42998	down	noncoding	ENST00000503778	RP11-366M4.13	GENCODE	747	chr4	-	165928237	165929111		TTTTAAAATAGCCAGATGCCAGTTTGGATTCCTTCACAAGTTGCCGGCTCTCGTTAGGCA	intergenic							5	26.5811	2.45604	4.23424	5	5	5	26.0753	22.7081	30.9599	2.46913	2.40305	2.49594	4.13376	4.10057	4.4684
ASHGA5P056718	0.00260847	0.016843	3.67638	down	noncoding	TCONS_00008021	XLOC_003485	LincRNAs identified by Cabili et al	248	chr4	+	27738267	27751818		CTCTACTTTGTATCCTTGGCCTGTGAGGCATCAGAACTGTTCTGACCCTAAAATTATTTG	intergenic							6.14466	34.2179	2.75913	4.63742	5	8.43398	5	35.696	30.4616	36.4961	2.46913	3.31232	2.49594	4.62648	4.55755	4.72822
ASHGA5P037616	0.000981911	0.00965922	2.50276	down	noncoding	ENST00000485225	GSTTP2	pseudogene	2070	chr22	-	24385937	24401899		CACACACTCTCACTTTTATCTTGTTTCTATAAATTAATAAATACAGCCTTTGTGAGTTGG								5	20.0045	2.45604	3.77956	5	5	5	21.4327	15.4732	23.1076	2.46913	2.40305	2.49594	3.82565	3.49897	4.01407
ASHGA5P035794	0.0109003	0.0407856	3.04579	down	noncoding	NR_027098	LINC00486	RefSeq	1991	chr2	+	33050509	33154206		GTCATGTTTCATCTTTCTAGAATTCATTTTTCACATCTTCATTCACTGGGATTCTGGACC	intergenic							9.78438	50.7244	3.63332	5.24014	5.88832	17.8797	5.58509	45.3202	52.6982	54.1548	3.26801	4.30222	3.32973	4.99253	5.40381	5.32407
ASHGA5P000443	0.0130075	0.0454695	3.03747	down	noncoding	chr5:15074475-15098700-	chr5:15074475-15098700	LincRNAs identified by Khalil et al	24225	chr5	-	15021475	15045700		AATGAATGAACTTCCTACTTTGATAATCCATAAAACCTGTCCTGATGTTAGATTTGCCTC	intergenic							7.72557	38.6509	3.22541	4.82828	7.19118	10.9855	5	37.0833	36.5885	42.281	3.5135	3.6668	2.49594	4.68278	4.84645	4.95562
ASHGA5P046776	0.000387863	0.00604317	2.59553	down	noncoding	ENST00000400581	TTTY5	GENCODE	1562	chrY	-	24442944	24445023		GTTGCATTCTTTCCCCCATCATGAAAAAGACTTTGATATAAGTAAGGAGGAAAAGCATTT	intergenic							69.7537	267.069	6.38857	7.76459	59.9283	81.2732	68.0596	300.162	245.907	255.139	6.30993	6.25563	6.60014	7.87189	7.77405	7.64785
ASHGA5P057732	0.00324485	0.0190417	3.83973	down	noncoding	TCONS_00021289	XLOC_010016	LincRNAs identified by Cabili et al	214	chr12	-	10433067	10443823		TTTAATCAAGGTCCTGGAAATGGCTAGAATCTGTCCTGAACTCTTGGCATCTTCTGATAC	intronic antisense	ENST00000544747	KLRD1	killer cell lectin-like receptor subfamily D, member 1 [Source:HGNC Symbol;Acc:6378]	+	10378656	10467418	6.74686	43.1835	3.05868	4.99969	5.43819	9.80237	5	41.5107	43.9512	44.0886	3.17106	3.50904	2.49594	4.855	5.127	5.01706
ASHGA5P021484	0.0237747	0.0673212	2.1322	down	noncoding	ENST00000533253	CTD-2523D13.2	GENCODE	523	chr11	+	119600292	119610333		AACAACGTGGGTTAATATTAATGCCCTGTACATCCTGAGTACATGTTTCCAGAAAGAGGT	bidirectional	NM_002855	PVRL1	poliovirus receptor-related protein 1 isoform 1 precursor	-	119531702	119599435	10.3547	40.1904	3.77463	4.86698	6.08924	16.9992	7.9758	37.5856	34.0398	48.946	3.30755	4.2371	3.77926	4.70324	4.7304	5.16729
ASHGA5P021484	0.0237747	0.0673212	2.1322	down	noncoding	ENST00000533253	CTD-2523D13.2	GENCODE	523	chr11	+	119600292	119610333		AACAACGTGGGTTAATATTAATGCCCTGTACATCCTGAGTACATGTTTCCAGAAAGAGGT	bidirectional	NM_203285	PVRL1	poliovirus receptor-related protein 1 isoform 2 precursor	-	119508807	119599435	10.3547	40.1904	3.77463	4.86698	6.08924	16.9992	7.9758	37.5856	34.0398	48.946	3.30755	4.2371	3.77926	4.70324	4.7304	5.16729
ASHGA5P021484	0.0237747	0.0673212	2.1322	down	noncoding	ENST00000533253	CTD-2523D13.2	GENCODE	523	chr11	+	119600292	119610333		AACAACGTGGGTTAATATTAATGCCCTGTACATCCTGAGTACATGTTTCCAGAAAGAGGT	bidirectional	NM_203286	PVRL1	poliovirus receptor-related protein 1 isoform 3 precursor	-	119545098	119599435	10.3547	40.1904	3.77463	4.86698	6.08924	16.9992	7.9758	37.5856	34.0398	48.946	3.30755	4.2371	3.77926	4.70324	4.7304	5.16729
ASHGA5P027432	0.00521566	0.0255914	3.71952	down	noncoding	ENST00000549710	RP11-498M15.1	GENCODE	577	chr12	-	72102950	72104154		CCCCAACTGCTCAGTATTTTCTTCTATCTTTAGTTAATCTGAGTGTCTATCACCTATGCT	intergenic							6.44791	35.5452	2.80551	4.70062	5	9.34373	5	33.0706	38.0516	35.5135	2.46913	3.45144	2.49594	4.51281	4.90603	4.68302
ASHGA5P032711	0.0382697	0.0931509	2.09435	down	noncoding	ENST00000438158	RP11-400N13.3	GENCODE	562	chr1	-	222215046	222238105		TGGTCAGTGCTCAACAAATGCCCCTACTGATTCAAGTATATGAGCAAGTCAAATAAAAAA	intergenic							6.03361	23.876	2.9607	4.0272	6.26626	6.83456	5	29.9273	15.9144	25.7862	3.34466	3.04149	2.49594	4.3563	3.54301	4.1823
ASHGA5P014841	0.00517382	0.0254868	2.01291	down	noncoding	ENST00000413928	AC015849.2	GENCODE	662	chr17	+	34195970	34212867		TCAAGCTCAATTTCCCTCTTTAAGGAAGAAAGGAAAGTGTTTTCCTGGATACTAGATATG	intronic antisense	NM_002985	CCL5	C-C motif chemokine 5 precursor	-	34198495	34207377	13.4343	49.8596	4.20042	5.2097	14.1279	17.0024	9.17258	45.2187	46.6182	57.7418	4.40985	4.23731	3.95409	4.98944	5.21954	5.42012
ASHGA5P020075	0.0109711	0.0409291	2.61365	down	noncoding	ENST00000507808	RP11-4O3.1	GENCODE	356	chr4	-	58471859	58524966		TTGGCATTTGACTTCTTCACACTCTTAAAAGCTATTGAGGCAGTTCCAAGATGGCTGAAT	intergenic							6.49312	29.6105	3.02318	4.40925	5.34678	9.13258	5	26.9642	32.7584	29.109	3.14934	3.42427	2.49594	4.1859	4.66953	4.37233
ASHGA5P055948	0.0103738	0.0395173	2.11691	down	noncoding	ENST00000557359	RP11-572M18.1	GENCODE	3484	chr14	+	28081793	28108842	NR_039992	AATATTAGTTAAGTCAAGATCATCTTTTTCATTTCCTACATGCAGGTTGAATCTCATTTA	intergenic							5	17.4156	2.45604	3.538	5	5	5	17.1169	12.5159	22.6141	2.46913	2.40305	2.49594	3.46093	3.17344	3.97963
ASHGA5P036948	0.0433019	0.101631	3.97302	down	noncoding	ENST00000451443	PLCB1-IT1	GENCODE	251	chr20	+	8229371	8237564		GGCTGAGCTCCTACTAAAAAGAAGATTAATGTGGAAATTAATCTAATCCAGGATTAAGAG	intron sense-overlapping	NM_015192	PLCB1	1-phosphatidylinositol 4,5-bisphosphate phosphodiesterase beta-1 isoform a	+	8113295	8865547	7.89772	45.7437	2.97429	4.96453	5	13.6932	5	54.5169	59.2158	23.4983	2.46913	3.9578	2.49594	5.27367	5.58304	4.03687
ASHGA5P036948	0.0433019	0.101631	3.97302	down	noncoding	ENST00000451443	PLCB1-IT1	GENCODE	251	chr20	+	8229371	8237564		GGCTGAGCTCCTACTAAAAAGAAGATTAATGTGGAAATTAATCTAATCCAGGATTAAGAG	intron sense-overlapping	NM_182734	PLCB1	1-phosphatidylinositol 4,5-bisphosphate phosphodiesterase beta-1 isoform b	+	8113295	8865547	7.89772	45.7437	2.97429	4.96453	5	13.6932	5	54.5169	59.2158	23.4983	2.46913	3.9578	2.49594	5.27367	5.58304	4.03687
ASHGA5P047799	0.00244734	0.0162776	2.60482	down	noncoding	BF818610		LincRNAs identified by Khalil et al	479	chr20	-	56700047	56700510		CCTGACAGCACAGCTTCAATAAATCACTTGACCTTGAATCCTCAATTGAAAGCACTGGAA	intergenic							5	20.8704	2.45604	3.83723	5	5	5	18.1408	17.9819	26.4886	2.46913	2.40305	2.49594	3.55102	3.73506	4.2256
ASHGA5P032494	0.00721338	0.0313668	3.51067	down	noncoding	TCONS_00029931	XLOC_014411	LincRNAs identified by Cabili et al	1439	chr22	-	50056122	50057944		ATACTCTCATCCTGGACCCTGCAATCTAAAGATGATTTTCTTGCAGAGGCTGAGTGAGCT	intergenic							13.8327	84.1084	4.19705	6.0088	7.62338	16.2706	17.6041	93.0169	72.9677	86.3406	3.59094	4.18047	4.81975	6.08981	5.91373	6.02286
ASHGA5P032365	0.00239185	0.0160781	2.24122	down	noncoding	ENST00000525111	RP11-445F12.1	GENCODE	1462	chr17	-	35289408	35293921		AGCGGCTCTGGGCAGGAATCCAACAAATAAATAAAACGTCTAAGACGGCGTGACAACAAT	bidirectional	NM_005568	LHX1	LIM/homeobox protein Lhx1	+	35294771	35301915	5	18.0972	2.45604	3.62033	5	5	5	21.1206	13.4231	19.7478	2.46913	2.40305	2.49594	3.80058	3.28464	3.77576
ASHGA5P023357	0.00462078	0.0237664	3.43703	down	noncoding	ENST00000579201	RP11-156L14.1	GENCODE	586	chr17	+	60783693	60813895		AACTGCATCTTGAGACCCAGACACATGCAAATGGCCTTCTGAGTTCATTCTTGATGGAGA	natural antisense	NM_001100875	MARCH10	probable E3 ubiquitin-protein ligase MARCH10	-	60778674	60884011	6.6316	38.8948	3.05601	4.83717	5.85027	9.04453	5	34.5619	39.5627	42.5598	3.26046	3.41162	2.49594	4.5793	4.96579	4.9664
ASHGA5P023357	0.00462078	0.0237664	3.43703	down	noncoding	ENST00000579201	RP11-156L14.1	GENCODE	586	chr17	+	60783693	60813895		AACTGCATCTTGAGACCCAGACACATGCAAATGGCCTTCTGAGTTCATTCTTGATGGAGA	natural antisense	NM_152598	MARCH10	probable E3 ubiquitin-protein ligase MARCH10	-	60778674	60885705	6.6316	38.8948	3.05601	4.83717	5.85027	9.04453	5	34.5619	39.5627	42.5598	3.26046	3.41162	2.49594	4.5793	4.96579	4.9664
ASHGA5P037881	0.0122603	0.0439648	3.44907	down	noncoding	NR_033320	MIAT	RefSeq	10119	chr22	+	27053445	27072440	NR_003491	ACATGATCCCATCTGCTCAGATCTTCATGTCAGAACACGCTTTATTACAGTCTCGGCAAG	intergenic							5.598	33.1521	2.78114	4.56735	6.79399	5	5	32.4985	40.95	26.0076	3.44444	2.40305	2.49594	4.48407	5.02254	4.19545
ASHGA5P058205	0.00212915	0.014968	3.09223	down	noncoding	TCONS_00028548	XLOC_013531	LincRNAs identified by Cabili et al	813	chr20	+	43808662	43819539	TCONS_00028172	TGAGTAATGTTTTGGGTGTGACCTCACAAGGCAACTTGCATTCTTAACTCTGTCTCAGCC	intergenic							5.83757	28.1537	2.70693	4.33557	5	7.5127	5	29.8605	27.9553	26.6452	2.46913	3.1557	2.49594	4.35278	4.41883	4.23511
ASHGA5P048556	0.00166823	0.0129143	3.05806	down	noncoding	ENST00000456027	HERC2P3	GENCODE	575	chr15	-	20663484	20667803		CTTTTGAGTTAAGAGCCTAACTTATTTCCTACTCACTATTTCTCCTGTAGCTCTTCAGGC	intergenic							24.3288	118.754	4.91981	6.53242	17.3388	38.8075	16.84	113.467	120.009	122.786	4.69146	5.31144	4.75652	6.37897	6.67206	6.54623
ASHGA5P032361	0.000300942	0.00529648	4.18169	down	noncoding	uc002hml.1	DQ580766	UCSC_knowngene	881	chr17	-	34794165	34795046	uc010cum.1	TCTAGATTCTGCTGAGATTTGAGCTTCATGGTGAACACATTCTTGTTGTGCTTGCTGCTG	intron sense-overlapping	ENST00000330458	TBC1D3G	TBC1 domain family, member 3G [Source:HGNC Symbol;Acc:29860]	-	34745935	34808103	5	32.1057	2.45604	4.52013	5	5	5	30.5546	25.9035	39.8589	2.46913	2.40305	2.49594	4.38896	4.30729	4.86413
ASHGA5P032361	0.000300942	0.00529648	4.18169	down	noncoding	uc002hml.1	DQ580766	UCSC_knowngene	881	chr17	-	34794165	34795046	uc010cum.1	TCTAGATTCTGCTGAGATTTGAGCTTCATGGTGAACACATTCTTGTTGTGCTTGCTGCTG	intron sense-overlapping	ENST00000400684	TBC1D3H	TBC1 domain family, member 3H [Source:HGNC Symbol;Acc:30708]	-	34581132	34808061	5	32.1057	2.45604	4.52013	5	5	5	30.5546	25.9035	39.8589	2.46913	2.40305	2.49594	4.38896	4.30729	4.86413
ASHGA5P032361	0.000300942	0.00529648	4.18169	down	noncoding	uc002hml.1	DQ580766	UCSC_knowngene	881	chr17	-	34794165	34795046	uc010cum.1	TCTAGATTCTGCTGAGATTTGAGCTTCATGGTGAACACATTCTTGTTGTGCTTGCTGCTG	intron sense-overlapping	ENST00000535446	TBC1D3H	TBC1 domain family, member 3H [Source:HGNC Symbol;Acc:30708]	-	34581085	34806015	5	32.1057	2.45604	4.52013	5	5	5	30.5546	25.9035	39.8589	2.46913	2.40305	2.49594	4.38896	4.30729	4.86413
ASHGA5P032361	0.000300942	0.00529648	4.18169	down	noncoding	uc002hml.1	DQ580766	UCSC_knowngene	881	chr17	-	34794165	34795046	uc010cum.1	TCTAGATTCTGCTGAGATTTGAGCTTCATGGTGAACACATTCTTGTTGTGCTTGCTGCTG	intron sense-overlapping	ENST00000535592	TBC1D3G	TBC1 domain family, member 3G [Source:HGNC Symbol;Acc:29860]	-	34746124	34807272	5	32.1057	2.45604	4.52013	5	5	5	30.5546	25.9035	39.8589	2.46913	2.40305	2.49594	4.38896	4.30729	4.86413
ASHGA5P032361	0.000300942	0.00529648	4.18169	down	noncoding	uc002hml.1	DQ580766	UCSC_knowngene	881	chr17	-	34794165	34795046	uc010cum.1	TCTAGATTCTGCTGAGATTTGAGCTTCATGGTGAACACATTCTTGTTGTGCTTGCTGCTG	intron sense-overlapping	ENST00000535805	TBC1D3G	TBC1 domain family, member 3G [Source:HGNC Symbol;Acc:29860]	-	34746119	34806015	5	32.1057	2.45604	4.52013	5	5	5	30.5546	25.9035	39.8589	2.46913	2.40305	2.49594	4.38896	4.30729	4.86413
ASHGA5P042104	0.00126051	0.0111022	2.36956	down	noncoding	NR_027113	LOC285740	RefSeq	1514	chr6	-	143875466	143890476		ATGTGCCTGTTGATCTACTATTCCGTGGAAATACTGGAATCACCAGCTCAATAATAAGAG	intronic antisense	ENST00000367584	PHACTR2	phosphatase and actin regulator 2 [Source:HGNC Symbol;Acc:20956]	+	143857981	144145301	5	18.8087	2.45604	3.70066	5	5	5	16.4692	20.1176	19.8394	2.46913	2.40305	2.49594	3.40782	3.91161	3.78255
ASHGA5P018763	0.0122293	0.0439046	3.15202	down	noncoding	ENST00000457383	RP11-70J12.1	GENCODE	635	chr9	-	4070905	4071884		AAAGGGAAAAGATCATTTTGGAATGTTGAAAGTGTTCCTCTGTACCTTGAAAAATCGGGA	intron sense-overlapping	NM_001042413	GLIS3	zinc finger protein GLIS3 isoform a	-	3824127	4300035	7.46427	40.1419	3.22763	4.8839	5	10.345	7.04779	42.5635	35.8057	42.0564	2.46913	3.58843	3.62533	4.89306	4.81199	4.94665
ASHGA5P018763	0.0122293	0.0439046	3.15202	down	noncoding	ENST00000457383	RP11-70J12.1	GENCODE	635	chr9	-	4070905	4071884		AAAGGGAAAAGATCATTTTGGAATGTTGAAAGTGTTCCTCTGTACCTTGAAAAATCGGGA	intron sense-overlapping	NM_152629	GLIS3	zinc finger protein GLIS3 isoform b	-	3824127	4152183	7.46427	40.1419	3.22763	4.8839	5	10.345	7.04779	42.5635	35.8057	42.0564	2.46913	3.58843	3.62533	4.89306	4.81199	4.94665
ASHGA5P031868	0.00118724	0.010643	2.16264	down	noncoding	ENST00000572067	CTC-479C5.10	GENCODE	3907	chr16	+	67916363	67920270		GACAAGCAGACATTCCATCCTGATATTTGCTATAAACACTGCTGCTTTTTTCTCCTCCAG	exon sense-overlapping	NM_014329	EDC4	enhancer of mRNA-decapping protein 4	+	67906925	67918417	39.142	135.954	5.62615	6.73895	37.078	50.045	30.303	128.938	147.962	130.962	5.6867	5.63404	5.55773	6.57448	6.99532	6.64703
ASHGA5P031868	0.00118724	0.010643	2.16264	down	noncoding	ENST00000572067	CTC-479C5.10	GENCODE	3907	chr16	+	67916363	67920270		GACAAGCAGACATTCCATCCTGATATTTGCTATAAACACTGCTGCTTTTTTCTCCTCCAG	exon sense-overlapping	NM_198443	NRN1L	neuritin-like protein precursor	+	67918780	67920271	39.142	135.954	5.62615	6.73895	37.078	50.045	30.303	128.938	147.962	130.962	5.6867	5.63404	5.55773	6.57448	6.99532	6.64703
ASHGA5P056250	0.0149678	0.049852	2.13944	down	noncoding	TCONS_00001454	XLOC_000783	LincRNAs identified by Cabili et al	281	chr1	-	36127391	36130797		ATGAAAACAGGGTACATCCCTTCATGCTGGAGCATCAGCATTGCTTCCTAACATGCATAT	intergenic							5	17.331	2.45604	3.55328	5	5	5	12.6956	18.3347	20.9627	2.46913	2.40305	2.49594	3.02309	3.76604	3.8707
ASHGA5P026856	0.0454902	0.105336	2.36001	down	noncoding	TCONS_00011856	XLOC_005347	LincRNAs identified by Cabili et al	313	chr6	+	74364303	74365877		TTTAGGCGGAAAAACAGCAATGGAAATTTGTTGAGTCCTATGATGTTGCTGGTTTTATAG	intergenic							7.71139	29.7658	3.16027	4.39907	5.05838	13.0758	5	35.4868	22.9282	30.8824	3.09061	3.89427	2.49594	4.61845	4.11461	4.46415
ASHGA5P036421	0.0469704	0.107558	2.4062	down	noncoding	TCONS_00026343	XLOC_012693	LincRNAs identified by Cabili et al	1505	chr18	+	56112362	56117785		AAAGAATTGTTTACTTTTAAACCCTGGATCCCATAAAGGGAGAGGGGAGAGGCCTAAAGC	intergenic							7.82088	31.3234	3.21443	4.48119	5	13.1202	5.34247	33.7377	23.6845	36.5481	2.46913	3.90083	3.27334	4.54447	4.1672	4.7319
ASHGA5P048288	8.47042e-05	0.00310145	4.68399	down	noncoding	ENST00000508543	AP002387.1	GENCODE	460	chr11	-	71125205	71134469		GCCTGGGACATATTGAACTTCCTGATTTTTTCTTCTTGTGATGGAATAAATGATTTTGGA	intergenic							6.58109	61.7934	3.30927	5.537	6.6547	6.92409	6.16447	69.4011	57.1692	58.81	3.41829	3.05831	3.4512	5.63847	5.524	5.44855
ASHGA5P037955	0.00188629	0.0139134	2.12578	down	noncoding	ENST00000444982	LL22NC01-116C6.1	GENCODE	147	chr22	+	33179162	33180968		TTTATATTGCCTGGATGCCTGACTTGGAAGTTCATGGTACAGTTCAGGGCCTTGAAACAG	intronic antisense	NM_001135774	SYN3	synapsin-3 isoform IIIg	-	32908539	33454377	10.459	42.521	3.88135	4.96934	7.8286	13.2551	10.2934	48.1001	37.947	41.5159	3.62694	3.91314	4.10398	5.07947	4.90183	4.92673
ASHGA5P037955	0.00188629	0.0139134	2.12578	down	noncoding	ENST00000444982	LL22NC01-116C6.1	GENCODE	147	chr22	+	33179162	33180968		TTTATATTGCCTGGATGCCTGACTTGGAAGTTCATGGTACAGTTCAGGGCCTTGAAACAG	intronic antisense	NM_003490	SYN3	synapsin-3 isoform IIIa	-	32908539	33402806	10.459	42.521	3.88135	4.96934	7.8286	13.2551	10.2934	48.1001	37.947	41.5159	3.62694	3.91314	4.10398	5.07947	4.90183	4.92673
ASHGA5P037955	0.00188629	0.0139134	2.12578	down	noncoding	ENST00000444982	LL22NC01-116C6.1	GENCODE	147	chr22	+	33179162	33180968		TTTATATTGCCTGGATGCCTGACTTGGAAGTTCATGGTACAGTTCAGGGCCTTGAAACAG	intronic antisense	NM_133633	SYN3	synapsin-3 isoform IIIc	-	32908539	33402806	10.459	42.521	3.88135	4.96934	7.8286	13.2551	10.2934	48.1001	37.947	41.5159	3.62694	3.91314	4.10398	5.07947	4.90183	4.92673
ASHGA5P023491	0.000778071	0.00857489	2.60894	down	noncoding	ENST00000582086	RP11-161I6.2	GENCODE	584	chr18	-	2034823	2111737		AATACAACTGTTTTGCCAGGACGATTAAATATCATTGATGCTTCTGGTCTACAATTAGTC	intergenic							5.29826	22.6625	2.61368	3.99715	5	5.89479	5	22.4908	23.3425	22.1542	2.46913	2.87598	2.49594	3.90106	4.1414	3.94897
ASHGA5P046130	0.0110001	0.0410063	2.30455	down	noncoding	NR_024440	LOC729609	RefSeq	628	chrX	-	20004934	20007897		TTCTACTTTAGATCCCTAATGCCAGGCAAATAGTCCCTCCTTATTAAGAATAAATGTACT	intergenic							364.69	966.255	8.47934	9.68382	215.567	521.611	356.894	923.343	848.248	1127.17	7.97925	8.67597	8.78279	9.56264	9.61974	9.86909
ASHGA5P036141	0.00200271	0.0144224	2.0958	down	noncoding	ENST00000424716	AC068137.1	pseudogene	533	chr2	+	130893550	130895332		TCTTCAACCATTCCCTGTACCGCATATTCATGCCAACCATGATTGCCATCCACAGCCCAC								43.7449	143.998	5.75927	6.82677	40.4376	58.7051	32.0918	131.098	154.675	146.221	5.80056	5.84675	5.63051	6.60329	7.06525	6.81176
ASHGA5P047639	0.000445112	0.00648376	2.4763	down	noncoding	TCONS_00013573	XLOC_006226	LincRNAs identified by Cabili et al	292	chr7	+	123560904	123564184		ACTACCCAGATGCTCAGTCACCTGTTGCTTTAGCATTGAGTTCCTGTTTCTCTTGTCTCA	intergenic							31.4255	126.286	5.31679	6.62497	24.9697	44.077	25.23	140.95	122.037	115.871	5.16745	5.4799	5.30302	6.72008	6.69655	6.45829
ASHGA5P040247	0.00375487	0.020806	2.8285	down	noncoding	ENST00000507483	RP11-440I14.3	GENCODE	792	chr4	+	175457790	175461935		GTCCAGTGAATATGACCATCTCTTGCCCATTTTCTAATGAGTGTTTTCATTAATGAGTTA	intergenic							31.7792	147.107	5.36107	6.86111	24.4171	32.6795	38.2409	157.811	136.128	147.381	5.1374	5.09143	5.8544	6.89169	6.86497	6.82667
ASHGA5P047362	0.0201729	0.0603868	2.73049	down	noncoding	BE092230		LincRNAs identified by Khalil et al	346	chr2	-	235440518	235440864		ATAAGAGCTAGCAACTGTACGTGAACCCTGGGCTACTAATTGCTCATCAGACTCCTCTAA	intergenic							7.05505	33.7872	3.17386	4.62302	5	8.4193	7.74585	33.1284	36.142	32.0912	2.46913	3.30891	3.74354	4.51473	4.82757	4.52675
ASHGA5P041137	0.00146174	0.011945	3.94432	down	noncoding	uc003jza.4	GTF2H2B	UCSC_knowngene	1873	chr5	+	69711196	69720976	ENST00000504712	ATTTTCTGGAAGTTGAAAAGATGTCTCTTAATTGTCCCAGTTCTACATTGTACCCGTAGC	intergenic							8.66584	62.7439	3.588	5.56778	5.08294	12.8138	8.10079	65.2776	63.0697	59.8845	3.09721	3.8696	3.79719	5.54474	5.68512	5.47348
ASHGA5P033621	0.00109053	0.0101282	2.2452	down	noncoding	NR_048536	LINC-ROR	RefSeq	2591	chr18	-	54721803	54739350		TTGCTTGAATATCTGAAGTTGTGGACTCAATCTCATACCTGCTCCACTTATGAGTTATAG	intergenic							20.4744	77.649	4.72717	5.89402	15.7076	30.3763	15.3392	81.2959	73.5448	78.1062	4.55181	4.99863	4.63107	5.88152	5.92659	5.87395
ASHGA5P018195	0.000766029	0.00848606	2.35868	down	noncoding	ENST00000450520	RP11-216M21.7	GENCODE	3200	chr9	-	42363047	42367092		TTCTAGGTTGTCTCTGAATCTTACTGGGGTTCCTTGTCCTAAACCACTCTCAGGAATGCT	intergenic							30.3795	116.678	5.26152	6.49951	22.6864	43.7672	24.6848	130.418	104.926	114.691	5.03873	5.47274	5.27311	6.59407	6.46112	6.44333
ASHGA5P051407	1.84209e-05	0.00170548	2.14827	down	noncoding	ENST00000425010	AL157902.3	GENCODE	763	chr1	-	118146620	118148392		GTGGGACACCTTTCTTTTTGCTTAGTACGCTTTTCTGCTATTCCTGCCGCATAACTCTCT	bidirectional	NM_017709	FAM46C	protein FAM46C	+	118148603	118171011	36.3582	127.619	5.54082	6.644	34.0836	45.3065	29.6845	128.743	123.666	130.446	5.57501	5.51689	5.53057	6.57136	6.71974	6.64089
ASHGA5P058023	0.0004766	0.00670168	4.03058	down	noncoding	TCONS_00025472	XLOC_012291	LincRNAs identified by Cabili et al	212	chr17	+	66638397	66638883		ATTGTCATAGCATGTCACCACGGAGACTTCCTTGTTCGTGTCTATATGGTTCATACATGG	intergenic							5	31.0235	2.45604	4.46703	5	5	5	35.5117	33.2578	24.301	2.46913	2.40305	2.49594	4.61964	4.69351	4.08794
ASHGA5P054132	0.0115768	0.0424411	3.26335	down	noncoding	ENST00000444691	RP11-432N13.4	GENCODE	241	chrX	-	134812380	134814989		AATGGCCAACCAGCACCTGGTAATGTCGTCACTACTGTTCCACCAGCGCTTATTAATATA	intergenic							7.51743	40.5209	3.19311	4.89946	5	11.9539	5.5984	44.8976	37.909	38.7561	2.46913	3.77696	3.33323	4.97806	4.90057	4.81975
ASHGA5P053523	2.46179e-05	0.00184244	4.4488	down	noncoding	ENST00000519801	RP11-318M2.2	GENCODE	977	chr8	-	104258005	104298135		CAAATGGAAGGTAATTGCCCTCAAATCACTTAACTAGGATGACCTACTTTGCTTTCCTGT	intergenic							5	33.4928	2.45604	4.60946	5	5	5	32.8601	35.4367	32.1816	2.46913	2.40305	2.49594	4.50142	4.79512	4.53183
ASHGA5P035877	0.00369742	0.0206164	2.81686	down	noncoding	ENST00000448341	RP11-231P20.2	GENCODE	647	chr1	+	26542604	26550244		TTTTATACCCTCGAGCACAGATTCTGTCACTCTTCTTGGTATCCCTGGCATGCAAACACT	intergenic							13.768	68.2327	4.18856	5.68265	8.43141	20.4158	12.4567	76.0423	57.5135	71.1423	3.72523	4.47252	4.36795	5.77876	5.53231	5.73688
ASHGA5P030919	0.0398528	0.095946	2.39814	down	noncoding	ENST00000570409	RP11-461A8.4	GENCODE	1068	chr16	-	3700636	3701704		AACTCACAGAGCACCATCAGATCCTTCTGAATTTTGAAGGAAGCAATGATACTCTGCTCT	intronic antisense	ENST00000407479	DNASE1	deoxyribonuclease I [Source:HGNC Symbol;Acc:2956]	+	3692938	3708095	5	20.4192	2.45604	3.71796	5	5	5	24.2919	10.1984	26.7675	2.46913	2.40305	2.49594	4.02349	2.88865	4.24174
ASHGA5P046341	0.00568219	0.0269846	2.15343	down	noncoding	ENST00000457876	AC004383.4	GENCODE	646	chrX	-	133678455	133679768		AAAGTCCTGGGCACTGTTGCTCATGAGTGCTGCACAACTGTCGCCCTCTAAAGCCACCTC	intergenic							109.852	334.393	6.97516	8.0818	103.296	135.688	90.572	304.064	261.991	437.123	7.04041	6.90201	6.98307	7.89236	7.86973	8.48331
ASHGA5P041232	4.46138e-05	0.00238725	2.41148	down	noncoding	ENST00000514092	CTC-454M9.1	GENCODE	501	chr5	+	88185261	88761799		GAGGTCAAGACAAAAATTCTGCATTTGGGAAAAGAATAACACATGGACTTCCTCCTACAG	intronic antisense	NM_001131005	MEF2C	myocyte-specific enhancer factor 2C isoform 2	-	88014057	88199922	43.609	163.612	5.75466	7.02458	36.6241	59.4609	34.7421	164.78	156.012	170.043	5.67025	5.86164	5.73208	6.95733	7.07775	7.03865
ASHGA5P041232	4.46138e-05	0.00238725	2.41148	down	noncoding	ENST00000514092	CTC-454M9.1	GENCODE	501	chr5	+	88185261	88761799		GAGGTCAAGACAAAAATTCTGCATTTGGGAAAAGAATAACACATGGACTTCCTCCTACAG	intronic antisense	NM_001193347	MEF2C	myocyte-specific enhancer factor 2C isoform 3	-	88014057	88199922	43.609	163.612	5.75466	7.02458	36.6241	59.4609	34.7421	164.78	156.012	170.043	5.67025	5.86164	5.73208	6.95733	7.07775	7.03865
ASHGA5P031372	0.0128372	0.0450813	3.26329	down	noncoding	uc021tmd.1	LOC727710	UCSC_knowngene	1507	chr16	-	85319914	85337002	NR_038858	CCCTTTTTATTTGTCACAGCTGAGTTGTCATACATTCCCTCGAATAAATGTTCCCATCTG	intergenic							7.56767	41.8173	3.24713	4.95346	5	10.0143	7.6887	41.0758	42.3407	42.0352	2.46913	3.54111	3.73115	4.84069	5.07362	4.94606
ASHGA5P020071	0.000261898	0.00500205	2.15375	down	noncoding	NR_026819	FAM138E	RefSeq	1130	chr15	+	102495087	102496558	ENST00000355746, NR_026818, NR_026821, NR_026822, NR_026823, uc010scw.1	CCAAATTCTTGTCGGATGCCCTCACAGAATTGAGATTATGTACGTAAAACACAAGGTGCC	intergenic							7.1928	31.7292	3.41589	4.52274	6.37097	8.50809	6.69933	33.8638	31.3146	30.0093	3.36587	3.32316	3.55863	4.54989	4.60156	4.41676
ASHGA5P056827	0.000210331	0.00450768	3.40274	down	noncoding	TCONS_00009070	XLOC_003974	LincRNAs identified by Cabili et al	219	chr4	-	69914348	69915748		TCTATTTGAGCAATGGAATAAACTGTTCTCTGCAATGACTACACTCACATTTGTTGGAGC	intergenic							5.21231	28.6587	2.59575	4.36245	5	5.63693	5	27.6932	29.3491	28.9339	2.46913	2.82219	2.49594	4.22876	4.49649	4.3621
ASHGA5P036087	0.00300645	0.0181966	3.76426	down	noncoding	ENST00000456685	AC016683.6	GENCODE	1207	chr2	+	113969098	113997267		TCTGCCATTGAAAAACCAGCCGCATCTCAGATCCCTTCAGAAGAGATGGATTTTCTTCCA	natural antisense	NM_003466	PAX8	paired box protein Pax-8 isoform PAX8A	-	113973573	114036498	6.18487	41.0994	2.9812	4.89357	5.88992	7.66469	5	49.636	30.5842	43.078	3.26836	3.1793	2.49594	5.13198	4.56447	4.98425
ASHGA5P036087	0.00300645	0.0181966	3.76426	down	noncoding	ENST00000456685	AC016683.6	GENCODE	1207	chr2	+	113969098	113997267		TCTGCCATTGAAAAACCAGCCGCATCTCAGATCCCTTCAGAAGAGATGGATTTTCTTCCA	natural antisense	NM_013952	PAX8	paired box protein Pax-8 isoform PAX8C	-	113973573	114036498	6.18487	41.0994	2.9812	4.89357	5.88992	7.66469	5	49.636	30.5842	43.078	3.26836	3.1793	2.49594	5.13198	4.56447	4.98425
ASHGA5P036087	0.00300645	0.0181966	3.76426	down	noncoding	ENST00000456685	AC016683.6	GENCODE	1207	chr2	+	113969098	113997267		TCTGCCATTGAAAAACCAGCCGCATCTCAGATCCCTTCAGAAGAGATGGATTTTCTTCCA	natural antisense	NM_013953	PAX8	paired box protein Pax-8 isoform PAX8D	-	113973573	114036498	6.18487	41.0994	2.9812	4.89357	5.88992	7.66469	5	49.636	30.5842	43.078	3.26836	3.1793	2.49594	5.13198	4.56447	4.98425
ASHGA5P036087	0.00300645	0.0181966	3.76426	down	noncoding	ENST00000456685	AC016683.6	GENCODE	1207	chr2	+	113969098	113997267		TCTGCCATTGAAAAACCAGCCGCATCTCAGATCCCTTCAGAAGAGATGGATTTTCTTCCA	natural antisense	NM_013992	PAX8	paired box protein Pax-8 isoform PAX8E	-	113973573	114036498	6.18487	41.0994	2.9812	4.89357	5.88992	7.66469	5	49.636	30.5842	43.078	3.26836	3.1793	2.49594	5.13198	4.56447	4.98425
ASHGA5P000556	1.70121e-05	0.00166685	2.94233	down	noncoding	chrX:136212300-136224525+	chrX:136212300-136224525	LincRNAs identified by Khalil et al	12225	chrX	+	136384634	136396859		TTTGTGTCCCCAGGAACTAAGAGGAATGGGTTATGGGATTCAGATGGAGTTTTCAGCAAC	intergenic							5	22.9147	2.45604	4.013	5	5	5	25.2287	22.135	21.3804	2.46913	2.40305	2.49594	4.08405	4.05649	3.89846
ASHGA5P020829	0.00386897	0.0211654	5.04074	down	noncoding	ENST00000520459	RP11-317J10.4	GENCODE	677	chr8	+	86436127	86452740		CTTAAGAACGAGAAAGCTACTCAAAGAAATGATCTCTTCCTGGATGTTGTGGTCCACGAA	intergenic							7.22283	61.6511	3.19977	5.5334	5	8.64431	8.02418	67.4985	54.9995	62.4554	2.46913	3.34493	3.78524	5.59538	5.46735	5.53748
ASHGA5P057967	0.0136386	0.0469333	2.02998	down	noncoding	TCONS_00024463	XLOC_011785	LincRNAs identified by Cabili et al	651	chr16	+	73798064	73802501		AGGGAGAGAGGACATACTGGATCTTTCTGGGTATCATCAAACTTCTCCATCCAAGAATAA	intergenic							9.26232	36.7493	3.72812	4.74959	11.6741	9.19455	6.91826	36.3998	39.585	34.2631	4.15108	3.43072	3.60258	4.65393	4.96652	4.62833
ASHGA5P028936	0.0248247	0.0692662	2.57082	down	noncoding	TCONS_00010518	XLOC_005036	LincRNAs identified by Cabili et al	649	chr5	-	141536508	141548749		TCTCTGATTTACCCAGGCAAGTGAAAGAAGACAGACTCCAGGATTACATTCTCCAGAGCA	intergenic							7.63945	33.0806	3.22854	4.59077	5	11.6592	6.25916	33.9532	32.2878	33.0007	2.46913	3.74501	3.47149	4.55513	4.6465	4.57068
ASHGA5P031767	0.0158142	0.0515467	3.3363	down	noncoding	ENST00000569993	RP11-7O14.1	GENCODE	437	chr16	+	51796429	51806557		CCCCAAATGGGATCTCTTTCCAGGTCTTTTTGTTAAAGCTTTTCTTTCCTAAATAAAACT	intergenic							8.17543	42.1009	3.22267	4.96091	5.50751	14.0188	5	42.3265	40.0666	43.9096	3.18703	3.98503	2.49594	4.88447	4.98628	5.012
ASHGA5P028666	0.000726994	0.00820116	2.29602	down	noncoding	ENST00000569288	RP11-29B2.4	GENCODE	442	chr13	-	103241721	103242163		TTGTTGCCTTCTCCAGCTGTGAGACATTCACTGGAATTTTCAGTAAATAACTTCTTAGGA	intergenic							15.0232	62.906	4.35517	5.5543	11.8568	20.0509	13.1619	71.586	51.8409	65.291	4.17399	4.44946	4.44204	5.68271	5.37924	5.60095
ASHGA5P047137	0.018974	0.0579846	2.08387	down	noncoding	ENST00000415509	RP11-338O1.2	GENCODE	416	chr10	-	125185228	125187156		GGGCCAGTGGTGCTGGATTTTATTTGCACTTTTCTGGGTTTAAATATTTTGAGAATTTTT	intergenic							5.76324	19.538	2.69318	3.75245	5	7.28973	5	19.3011	22.7657	16.5471	2.46913	3.11447	2.49594	3.65629	4.1037	3.49735
ASHGA5P043718	0.000123309	0.00358719	2.99351	down	noncoding	TCONS_00018143	XLOC_008422	LincRNAs identified by Cabili et al	730	chr10	+	27195823	27198867		GCACTTACTACCCTGTCAGTCCAAAATGTAATATTGTGCAATAGCCTTTAAATTGTATTG	intergenic							5	23.2629	2.45604	4.03788	5	5	5	24.5078	24.472	20.8087	2.46913	2.40305	2.49594	4.03439	4.21923	3.86002
ASHGA5P036465	0.000121093	0.00357008	2.21719	down	noncoding	TCONS_00016378	XLOC_007753	LincRNAs identified by Cabili et al	500	chr9	-	86188942	86190093		AAGAAACATCTTCCCTGTTAGTACCCAGTGAACTGAGACTGGGCTAGAAAATCACATCTG	intergenic							12.5343	52.1932	4.13791	5.28664	12.5586	14.5954	10.449	55.0009	51.3644	50.2142	4.25344	4.03909	4.12119	5.28721	5.36609	5.20662
ASHGA5P058867	0.00701851	0.0308601	2.96859	down	noncoding	uc.470-	uc.470	UCR	341	chrX	-	25401215	25401556		ATTAAAACTGACCTTGTCATTTCACTGCCTGTAAAACACCATTATCTCACCATTTATCAC	intergenic							11.2383	59.1125	3.90577	5.47554	6.04773	16.3385	11.3287	61.45	58.8874	57.0001	3.29853	4.18605	4.23272	5.45279	5.57385	5.39999
ASHGA5P035419	0.00090251	0.00923938	2.92316	down	noncoding	ENST00000455988	AC007405.8	GENCODE	547	chr2	-	171672914	171674547		AAAGGCCCATATCTTTACGTTCTCCCTCGGACTTGGCCAGAGAAGAACCACAGTCACCTT	natural antisense	NM_000817	GAD1	glutamate decarboxylase 1 isoform GAD67	+	171673199	171717659	167.286	611.146	7.46025	9.00779	116.433	253.335	132.091	597.504	525.809	710.124	7.20183	7.71029	7.46864	8.91341	8.91182	9.19813
ASHGA5P035419	0.00090251	0.00923938	2.92316	down	noncoding	ENST00000455988	AC007405.8	GENCODE	547	chr2	-	171672914	171674547		AAAGGCCCATATCTTTACGTTCTCCCTCGGACTTGGCCAGAGAAGAACCACAGTCACCTT	natural antisense	NM_013445	GAD1	glutamate decarboxylase 1 isoform GAD25	+	171673199	171699269	167.286	611.146	7.46025	9.00779	116.433	253.335	132.091	597.504	525.809	710.124	7.20183	7.71029	7.46864	8.91341	8.91182	9.19813
ASHGA5P058717	0.00218376	0.0151791	2.4241	down	noncoding	uc.332-	uc.332	UCR	337	chr11	-	116232689	116233026		AGACTGTCTGGTAAAGAGATAAATAAGTGTCTCTTCAAATCCTCGATCTCCTCTTCTCTA	intergenic							38.1079	143.798	5.55117	6.82862	25.7316	55.4149	33.1773	142.565	142.863	145.965	5.21	5.77113	5.67238	6.73966	6.93662	6.80958
ASHGA5P047997	0.000113799	0.00345962	2.27071	down	noncoding	ENST00000526061	RP11-1L12.3	GENCODE	471	chr11	-	27068732	27240282		AGATGGCTCCTCTTAGAACTATGCATCTCTCCTGATACTTGGATGCTTTTCCTCTGACTG	intronic antisense	NM_003986	BBOX1	gamma-butyrobetaine dioxygenase	+	27062508	27149354	48.7551	169.335	5.89019	7.07334	40.6661	68.45	37.1491	183.674	154.947	169.383	5.80778	6.03897	5.82383	7.11975	7.06679	7.03348
ASHGA5P018718	0.00231331	0.0157478	3.02853	down	noncoding	ENST00000456749	RP11-557H15.2	GENCODE	1533	chr6	+	134797767	134825157		ATATGTCAGGATACAGCAGGACCAAAACCTAGCCTTTGTCCTATGTCTGGAGACTTCTTG	intergenic							5.59061	27.14	2.66502	4.26364	5	6.77182	5	26.1359	22.767	32.517	2.46913	3.02998	2.49594	4.13894	4.10398	4.54799
ASHGA5P041677	0.0179289	0.0558777	2.00904	down	noncoding	ENST00000453136	RP11-263K19.4	GENCODE	912	chr1	+	155168374	155175286		CCTATCCCTAATTCTACTATGTGGCTCTCAACACCTTGTATTTAATAGGTACACAATAAA	natural antisense	NM_001252607	THBS3	thrombospondin-3 isoform 2 precursor	-	155165378	155177772	80.6981	241.27	6.59327	7.59978	74.9964	84.8283	82.2696	247.134	279.491	197.186	6.61536	6.30577	6.85868	7.57034	7.96811	7.26089
ASHGA5P041677	0.0179289	0.0558777	2.00904	down	noncoding	ENST00000453136	RP11-263K19.4	GENCODE	912	chr1	+	155168374	155175286		CCTATCCCTAATTCTACTATGTGGCTCTCAACACCTTGTATTTAATAGGTACACAATAAA	natural antisense	NM_001252608	THBS3	thrombospondin-3 isoform 3 precursor	-	155165378	155177772	80.6981	241.27	6.59327	7.59978	74.9964	84.8283	82.2696	247.134	279.491	197.186	6.61536	6.30577	6.85868	7.57034	7.96811	7.26089
ASHGA5P041677	0.0179289	0.0558777	2.00904	down	noncoding	ENST00000453136	RP11-263K19.4	GENCODE	912	chr1	+	155168374	155175286		CCTATCCCTAATTCTACTATGTGGCTCTCAACACCTTGTATTTAATAGGTACACAATAAA	natural antisense	NM_007112	THBS3	thrombospondin-3 isoform 1 precursor	-	155165378	155177772	80.6981	241.27	6.59327	7.59978	74.9964	84.8283	82.2696	247.134	279.491	197.186	6.61536	6.30577	6.85868	7.57034	7.96811	7.26089
ASHGA5P030215	0.00128815	0.0112341	2.38315	down	noncoding	ENST00000515341	GOLGA6L5	pseudogene	1828	chr15	-	85053156	85060016	ENST00000414190, ENST00000506719, NM_001164465, NM_001267536, NM_198181, uc010upk.1	AGGCTGCATGCCATTCTTTTCGGGCTGCGGAGAACAGGGAGCTAAACATCACCATCATCT								1101.4	2993.46	10.0764	11.3293	1177.2	1284.55	842.446	2827.28	3216.31	2936.8	10.3158	9.96528	9.94813	11.177	11.5153	11.2955
ASHGA5P035469	0.00904449	0.0363384	2.22105	down	noncoding	ENST00000567327	RP11-366L5.1	GENCODE	3813	chr2	-	182752577	182756390		GGCCCCTCAATGTATCCATTAACATTTCCAGGGATACCAGTGAAATAATTTGCAATAGCA	bidirectional	NM_001130445	SSFA2	sperm-specific antigen 2 isoform 1	+	182756471	182795464	829.62	2190.46	9.6786	10.8298	834.351	903.864	750.645	2138.04	2678.37	1754.97	9.8062	9.44527	9.78434	10.7608	11.2284	10.5003
ASHGA5P035469	0.00904449	0.0363384	2.22105	down	noncoding	ENST00000567327	RP11-366L5.1	GENCODE	3813	chr2	-	182752577	182756390		GGCCCCTCAATGTATCCATTAACATTTCCAGGGATACCAGTGAAATAATTTGCAATAGCA	bidirectional	NM_006751	SSFA2	sperm-specific antigen 2 isoform 2	+	182756471	182795464	829.62	2190.46	9.6786	10.8298	834.351	903.864	750.645	2138.04	2678.37	1754.97	9.8062	9.44527	9.78434	10.7608	11.2284	10.5003
ASHGA5P030266	0.00351818	0.019979	2.08983	down	noncoding	ENST00000561674	RP11-152L20.3	GENCODE	1304	chr15	-	92691981	92874267		ATGGAGCTGCAGTGCCATAATTTAACTCACTATTCCAATTCAGGTTTTTCTGCTATTATA	intronic antisense	NM_001145044	SLCO3A1	solute carrier organic anion transporter family member 3A1 isoform 2	+	92396937	92715665	5	16.7619	2.45604	3.51943	5	5	5	14.143	17.6068	18.5358	2.46913	2.40305	2.49594	3.17906	3.70126	3.67797
ASHGA5P030266	0.00351818	0.019979	2.08983	down	noncoding	ENST00000561674	RP11-152L20.3	GENCODE	1304	chr15	-	92691981	92874267		ATGGAGCTGCAGTGCCATAATTTAACTCACTATTCCAATTCAGGTTTTTCTGCTATTATA	intronic antisense	NM_013272	SLCO3A1	solute carrier organic anion transporter family member 3A1 isoform 1	+	92396937	92709137	5	16.7619	2.45604	3.51943	5	5	5	14.143	17.6068	18.5358	2.46913	2.40305	2.49594	3.17906	3.70126	3.67797
ASHGA5P035612	2.31975e-05	0.00179863	4.05377	down	noncoding	ENST00000413841	AC105461.1	GENCODE	391	chr2	-	232843197	232880430		CTGGTTTCTTTTTATCCACTAGGAAATCATTCTCTTTTACTTCCACAAGACCGAAACATA	natural antisense	NM_001257281	DIS3L2	DIS3-like exonuclease 2 isoform 2	+	232826292	233208678	5	30.7681	2.45604	4.4753	5	5	5	30.6164	32.2813	29.4068	2.46913	2.40305	2.49594	4.39242	4.64626	4.38724
ASHGA5P035612	2.31975e-05	0.00179863	4.05377	down	noncoding	ENST00000413841	AC105461.1	GENCODE	391	chr2	-	232843197	232880430		CTGGTTTCTTTTTATCCACTAGGAAATCATTCTCTTTTACTTCCACAAGACCGAAACATA	natural antisense	NM_001257282	DIS3L2	DIS3-like exonuclease 2 isoform 3	+	232826292	232995592	5	30.7681	2.45604	4.4753	5	5	5	30.6164	32.2813	29.4068	2.46913	2.40305	2.49594	4.39242	4.64626	4.38724
ASHGA5P035612	2.31975e-05	0.00179863	4.05377	down	noncoding	ENST00000413841	AC105461.1	GENCODE	391	chr2	-	232843197	232880430		CTGGTTTCTTTTTATCCACTAGGAAATCATTCTCTTTTACTTCCACAAGACCGAAACATA	natural antisense	NM_152383	DIS3L2	DIS3-like exonuclease 2 isoform 1	+	232826292	233201908	5	30.7681	2.45604	4.4753	5	5	5	30.6164	32.2813	29.4068	2.46913	2.40305	2.49594	4.39242	4.64626	4.38724
ASHGA5P041479	3.11284e-05	0.00200997	3.23459	down	noncoding	TCONS_00020475	XLOC_009808	LincRNAs identified by Cabili et al	324	chr12	+	76407803	76408563		ATCCTATAAAATAGCAGGTCTTATAGTTTCCTTCTTTTTCCCATAGGAAGGAAGGGGAAA	intergenic							15.1328	87.2145	4.37834	6.07193	12.4876	19.2221	13.6886	91.9818	84.3244	85.3373	4.24608	4.39678	4.49217	6.07239	6.13768	6.00571
ASHGA5P057177	0.000265491	0.00503233	2.12499	down	noncoding	TCONS_00014132	XLOC_006092	LincRNAs identified by Cabili et al	644	chr7	+	48883531	48885282		ACAACTACCTGGATCTTCCAACTCTGAAGTCAGTTTCTCCTCCTGAGTCTTCTAAAGCTA	intergenic							106.728	311.612	6.9202	8.00765	84.4193	140.353	95.4107	317.846	298.477	318.513	6.76185	6.948	7.05074	7.96449	8.06517	7.99329
ASHGA5P023748	0.000905308	0.00924245	2.37386	down	noncoding	HMlincRNA165+	HMlincRNA165	LincRNAs identified by Khalil et al	4741	chr6	+	118113617	118118358		AGATTTTGCCCACATAGATTTATGTCCTAGCTGGGTTTGTGTTCTTTAATCAACGTTCAA	intergenic							10.4224	46.828	3.8757	5.12294	7.88489	13.5628	9.81957	51.2411	46.1196	43.1233	3.63688	3.94372	4.04651	5.18083	5.20275	4.98522
ASHGA5P026683	0.00107687	0.010075	2.86901	down	noncoding	TCONS_00012631	XLOC_005559	LincRNAs identified by Cabili et al	3991	chr6	+	170361246	170367494		TCTATAGGACCTGTAGACCTATAGCTGCCTGTATGATCCTGTGGGTACAATCTCCTAATG	intergenic							25.2362	118.076	4.99562	6.51617	17.3221	38.2958	20.0907	123.615	103.369	127.245	4.68978	5.29192	5.00516	6.50628	6.4407	6.60154
ASHGA5P030054	0.00257131	0.0167333	2.71594	down	noncoding	ENST00000561934	RP11-48G14.1	GENCODE	839	chr15	-	56700680	56702384		GCCAGCTGTGGTAGACTCATTTCCATATCTGAAATTGTGAGTAATATTATCTATACCTAA	intronic antisense	NM_198524	TEX9	testis-expressed sequence 9 protein	+	56657643	56738072	5.39965	23.9332	2.63293	4.07439	5	6.19895	5	26.1169	25.8404	19.8424	2.46913	2.93373	2.49594	4.13739	4.30276	3.78301
ASHGA5P018654	0.030124	0.0787655	2.06574	down	noncoding	ENST00000456100	AL163953.3	GENCODE	562	chr14	+	53684429	54153976		ATGGAAGGAGCTTGGGGCCAGTCATCATCTTAAAGGCTCTGTGGCAGCTTGGACTTGAAG	intergenic							14.4316	53.1405	4.2663	5.31295	8.41578	17.2516	17.6273	57.3841	49.2941	52.7433	3.72236	4.25516	4.82137	5.34809	5.30286	5.28791
ASHGA5P019793	0.0485795	0.110234	2.50228	down	noncoding	ENST00000503309	RP11-471J12.1	GENCODE	509	chr4	+	174451625	174455228	ENST00000508887, ENST00000512246, ENST00000515376	AGCCTGTTTGTGGAAGTGACTCTGACCGTTCCCTTAAGAATCTTTAATGCTCTTACATGA	bidirectional	NM_021973	HAND2	heart- and neural crest derivatives-expressed protein 2	-	174447651	174451378	18.8762	80.1099	4.60577	5.92901	11.5557	16.6968	28.376	83.8131	91.6394	64.8771	4.13876	4.21392	5.46463	5.93235	6.2637	5.59099
ASHGA5P037794	0.000865803	0.00906011	2.73416	down	noncoding	uc002zof.3	DQ786190	UCSC_knowngene	2139	chr22	+	18847155	18849294	NR_024583	CTCAAGAGTTTCATTTTATGGTCTTTCTCTTGTTCTGTAAAATGTGGGCATGGATAGATA	intergenic							8.61116	46.4093	3.64914	5.10024	7.79865	9.9345	8.10034	51.3079	49.0523	38.8677	3.62143	3.52896	3.79703	5.18274	5.29434	4.82363
ASHGA5P030730	1.12442e-05	0.00137542	5.00466	down	noncoding	TCONS_00006372	XLOC_002988	LincRNAs identified by Cabili et al	568	chr3	+	194570163	194575044		CTCATTGGGAGTTCTTTCCAAAGCGTATCTGTTTCCTCTTTTTTGTCTTCATTTTTCGGG	intergenic							25.3769	204.641	5.04423	7.3675	22.0818	34.4355	19.6133	216.47	201.339	196.115	5.00262	5.15895	4.97113	7.37481	7.4739	7.2538
ASHGA5P043085	4.06374e-05	0.00229975	4.10423	down	noncoding	ENST00000433918	RP11-340I6.7	GENCODE	442	chr7	-	63348577	63359219		CCTAGATGTCATCATACAAATTACAGGCTATGACGTCCACCTCATTCTCTTTCTGGAAGG	intergenic							8.09201	63.4607	3.54683	5.58394	6.58289	10.8635	6.82958	61.2204	63.8347	65.3271	3.40575	3.65179	3.58296	5.44704	5.70253	5.60226
ASHGA5P037803	0.00183392	0.013672	2.10257	down	noncoding	NR_038403	MKNK1-AS1	RefSeq	2445	chr1	+	47004367	47035927		CTCTGTTCCCTTCAGTGCATTCTTGTAAATAAATAAATAATAAAACCTGCCTTTACCACC	intronic antisense	NM_001097611	KNCN	kinocilin	-	47011315	47016887	56.5911	183.015	6.12171	7.19386	57.5582	63.9239	48.2911	174.577	194.637	179.83	6.25927	5.95198	6.15388	7.04072	7.41887	7.122
ASHGA5P037803	0.00183392	0.013672	2.10257	down	noncoding	NR_038403	MKNK1-AS1	RefSeq	2445	chr1	+	47004367	47035927		CTCTGTTCCCTTCAGTGCATTCTTGTAAATAAATAAATAATAAAACCTGCCTTTACCACC	natural antisense	NM_001135553	MKNK1	MAP kinase-interacting serine/threonine-protein kinase 1 isoform 3	-	47023078	47069966	56.5911	183.015	6.12171	7.19386	57.5582	63.9239	48.2911	174.577	194.637	179.83	6.25927	5.95198	6.15388	7.04072	7.41887	7.122
ASHGA5P037803	0.00183392	0.013672	2.10257	down	noncoding	NR_038403	MKNK1-AS1	RefSeq	2445	chr1	+	47004367	47035927		CTCTGTTCCCTTCAGTGCATTCTTGTAAATAAATAAATAATAAAACCTGCCTTTACCACC	natural antisense	NM_003684	MKNK1	MAP kinase-interacting serine/threonine-protein kinase 1 isoform 1	-	47023078	47069966	56.5911	183.015	6.12171	7.19386	57.5582	63.9239	48.2911	174.577	194.637	179.83	6.25927	5.95198	6.15388	7.04072	7.41887	7.122
ASHGA5P037803	0.00183392	0.013672	2.10257	down	noncoding	NR_038403	MKNK1-AS1	RefSeq	2445	chr1	+	47004367	47035927		CTCTGTTCCCTTCAGTGCATTCTTGTAAATAAATAAATAATAAAACCTGCCTTTACCACC	natural antisense	NM_198973	MKNK1	MAP kinase-interacting serine/threonine-protein kinase 1 isoform 2	-	47023078	47069966	56.5911	183.015	6.12171	7.19386	57.5582	63.9239	48.2911	174.577	194.637	179.83	6.25927	5.95198	6.15388	7.04072	7.41887	7.122
ASHGA5P023515	0.00680642	0.030286	2.40289	down	noncoding	ENST00000582700	RP11-25O3.1	GENCODE	714	chr18	-	49862730	49865395		AATGTATAAGGTCTTACAGTTTGCTCTGAGGGTACTACTGCTCCACATTTCTCAACTACA	intergenic							18.9738	78.6262	4.65081	5.91558	12.2196	23.9828	20.7188	78.3749	78.288	79.2156	4.21814	4.68839	5.04588	5.82961	6.02165	5.89548
ASHGA5P039554	0.024471	0.0687031	4.41192	down	noncoding	ENST00000511590	RP11-119H12.6	GENCODE	712	chr4	-	113801615	113803486		CACTTAATTTTCCTCCTTTTGTAAACTGGCAATCTTGACTCTAACATTGCTAGGAATTAC	intronic antisense	NM_001127493	ANK2	ankyrin-2 isoform 3	+	113739238	114304896	26.0386	204.44	5.02598	7.16738	13.7395	33.0195	31.3567	131.536	125.97	355.813	4.3714	5.10314	5.60339	6.60853	6.74487	8.14875
ASHGA5P020476	0.000281009	0.00517571	2.11682	down	noncoding	ENST00000514303	AC005592.2	GENCODE	152	chr5	+	141733107	141755219		CTTGGAAGTGGTCCATTGGATTCGAAGGGGTCCTCACACGAAGCAGGAAGTCACCCTGTA	intergenic							5.03425	18.1765	2.56695	3.64885	5	5.10276	5	20.0089	16.6396	17.881	2.46913	2.73577	2.49594	3.71205	3.61094	3.62355
ASHGA5P030969	0.00863725	0.0352909	3.4553	down	noncoding	ENST00000563116	CTD-3037G24.4	GENCODE	563	chr16	-	12650209	12651551		AGTGTCATCTTCTGTACTATATTGCCAGTGCCTACAATTACGACTGGTATACTCAACCAG	intronic antisense	NM_032167	SNX29	sorting nexin-29	+	12070601	12668146	6.06879	40.2493	3.10604	4.89485	7.73915	5	5.46721	38.5212	41.3662	40.8606	3.6113	2.40305	3.30377	4.74252	5.03925	4.90278
ASHGA5P000372	0.0114691	0.0422427	2.37101	down	noncoding	chr2:88735550-88749975+	chr2:88735550-88749975	LincRNAs identified by Khalil et al	14425	chr2	+	88954435	88968860		AGGCTATCTTTCGGTAGAGTGACCAACTGTCCCAGATTCCCAAGGTTTTATAGGATATGG	intergenic							9.86905	43.8111	3.76939	5.01489	5.7766	12.8148	11.0157	46.8672	38.548	46.018	3.2464	3.86974	4.19201	5.04113	4.92371	5.07983
ASHGA5P031612	0.000729325	0.00822171	2.09913	down	noncoding	ENST00000567395	RP11-20G6.2	GENCODE	932	chr16	+	23031657	23034932		ATAGACGTTCCTGTTCCATTTGTCCCGCAAACGTTTAAACATCACACATACTTGGTTAAG	intergenic							29.3028	101.637	5.22567	6.29547	26.0697	40.8048	21.0339	110.872	100.008	94.0306	5.22796	5.38023	5.06882	6.34089	6.38893	6.15657
ASHGA5P023334	0.000312356	0.00541986	2.17094	down	noncoding	ENST00000578610	RP11-202D1.3	GENCODE	568	chr18	+	51094816	51124221		CAAAATTTTATAAAGGTAGGTCATGTATTGCTCCATTGATGCTGCCCTTATTCATGATGA	intergenic							35.3993	125.842	5.50386	6.62218	32.0301	44.822	29.3457	129.881	130.557	117.087	5.49349	5.50445	5.51364	6.58769	6.80296	6.47589
ASHGA5P040468	0.0173695	0.05478	2.70641	down	noncoding	uc003juq.3	BC028670	UCSC_knowngene	1650	chr5	-	65500950	65505274		CAATTAATGACAGCCTGTAGAGTTCTGTATTCATAGAAGCAGTAGGGGTACATGCTGCAG	intergenic							5.03277	24.87	2.66674	4.10312	5.0983	5	5	25.237	31.7434	17.6297	3.10123	2.40305	2.49594	4.08463	4.62278	3.60196
ASHGA5P057481	2.50961e-06	0.000945923	2.42952	down	noncoding	TCONS_00018206	XLOC_008486	LincRNAs identified by Cabili et al	2383	chr10	+	58058712	58074528		TGTCAACTCAAATGCTTGATCAAAAGTATTGATTATCTGGTGTCAGCTGTTTTCCTGAAT	intergenic							5	19.1706	2.45604	3.73671	5	5	5	19.9782	18.3612	19.1723	2.46913	2.40305	2.49594	3.70969	3.76908	3.73137
ASHGA5P056829	0.00161076	0.0126789	2.87755	down	noncoding	TCONS_00009112	XLOC_004054	LincRNAs identified by Cabili et al	1596	chr4	-	120038633	120049505		ACAAGCATATCACTTGTTCTTCCTCTATAAGAAGATCTTGGTTTATCTTGGCTCTTCCAT	intergenic							12.674	65.5278	4.10486	5.6297	9.83512	18.314	9.87286	60.0282	74.479	62.0761	3.92788	4.33253	4.05418	5.41591	5.9457	5.5275
ASHGA5P039601	0.00254929	0.0166411	2.05453	down	noncoding	ENST00000504728	RP11-400D2.2	GENCODE	744	chr4	-	135176327	135248625		GGTTTAGTGTCCCCGTAAAATTTCCCTAGAATGGGAAATAATGTCAGGGCAGCAATACAG	intergenic							5.2069	18.0873	2.59485	3.63366	5	5.6207	5	21.5771	16.3434	16.3413	2.46913	2.81948	2.49594	3.83645	3.58479	3.47974
ASHGA5P018011	0.0062168	0.0286042	3.51495	down	noncoding	ENST00000448318	RP1-272J12.1	GENCODE	2168	chr22	-	35318598	35468882		AACAAGGATGTGAAGAGATAATCTGAAACAACAGTATATGACTCAAACTCTCCTCTTCTC	intronic antisense	NM_001008494	ISX	intestine-specific homeobox	+	35462129	35483380	7.21698	42.4152	3.15658	4.97008	7.10175	9.54918	5	43.5723	44.7599	38.9133	3.49646	3.47733	2.49594	4.93091	5.15348	4.82586
ASHGA5P023431	0.00741601	0.0319587	3.6045	down	noncoding	ENST00000580780	NOS2P1	pseudogene	1647	chr17	-	25978359	25992738		TCAGCTCAAGTGCTATCACGAAGATATCTTTGGTGCTGTATTTCCCTACAAGCAGACAAG								6.67788	35.2184	2.83632	4.68612	5	10.0336	5	32.4468	36.0456	37.1629	2.46913	3.54389	2.49594	4.48139	4.82299	4.75399
ASHGA5P050482	0.000224274	0.00464442	4.20899	down	noncoding	ENST00000443306	AC007131.2	GENCODE	422	chr2	-	59465850	59476807		GACACCACTTCTCAAGCACCTGATTATTCTTTCTCAGTATTTAGAAGCAAAAATTATCCT	intergenic							5.01776	34.2467	2.56513	4.6386	5	5.05327	5	29.9759	35.7716	36.9927	2.46913	2.73031	2.49594	4.35851	4.81043	4.74686
ASHGA5P043203	0.00183413	0.013672	2.61006	down	noncoding	ENST00000427337	RP11-445P19.1	GENCODE	424	chr1	+	187412759	187446354		GCTCCATGATATGTATCTCTCATCTGTTAGCTCAGGCAGAATTAAAATGCTAGACAATAA	intergenic							5.22651	22.6671	2.59848	3.98256	5	5.67952	5	27.5977	21.45	18.9536	2.46913	2.83037	2.49594	4.22428	4.01117	3.71224
ASHGA5P031584	1.94151e-05	0.00170952	2.8659	down	noncoding	ENST00000418743	RP4-749H3.1	GENCODE	785	chr1	-	20724597	20755232		GCTATGTTCTCTCCTTTCATTGTGCCATTTCATTCTCACCCCAAAATGAAAACACACAAA	intergenic							121.862	463.178	7.08837	8.60736	107.732	165.191	92.6609	477.792	459.033	452.708	7.09782	7.15441	7.01286	8.58582	8.7024	8.53384
ASHGA5P040137	0.0110107	0.0410381	2.08337	down	noncoding	ENST00000425124	BX571672.3	GENCODE	470	chr1	+	143188827	143189695	TCONS_00028963	TAGATGGGAGCAAGTGTCCAATACAGCAACAGCTGGAAAGAAAAATAAAGAATTTTGTTC	intergenic							43.8296	144.757	5.77832	6.83723	53.2757	45.6485	32.5644	138.133	159.239	136.899	6.15776	5.52766	5.64953	6.68711	7.11026	6.71433
ASHGA5P045657	0.000196112	0.00437399	2.48549	down	noncoding	TCONS_00001831	XLOC_001217	LincRNAs identified by Cabili et al	619	chr1	-	222763364	222765741		ACCAATGGCCCATCGTAGTGAATTTCTCGGGTAAAGTGACATTCTCCGCTTTTGAATGCT	intergenic							7.96129	39.5233	3.54615	4.85968	7.93846	9.32359	6.62181	43.4326	39.34	35.7974	3.64743	3.44884	3.54217	4.92546	4.95736	4.69621
ASHGA5P025908	0.0161352	0.0521855	2.08851	down	noncoding	NR_046458	LOC284260	RefSeq	761	chr18	+	39766632	39917261	NR_046174	TATGGCAGTGCTCCAGTGCCATGACAGTTTTAATCTTCTGGTTCCATCTGCATAGATTTC	intergenic							14.6284	56.0579	4.33144	5.39391	18.8391	13.5464	11.4997	58.2929	58.448	51.4327	4.79704	3.94138	4.25591	5.3732	5.55938	5.24916
ASHGA5P043366	6.46099e-05	0.00280617	4.44464	down	noncoding	ENST00000566521	RP5-842K16.2	GENCODE	596	chr7	-	141129510	141131068		GTTTTGCCTATGACTTTCTTCTAGGGTGTAAGTTGGTTCCGCATCATAATGTAATTATAT	intronic antisense	NM_001195278	TMEM178B	transmembrane protein 178B precursor	+	140774031	141180179	5	33.7535	2.45604	4.60811	5	5	5	38.5791	33.6623	29.0192	2.46913	2.40305	2.49594	4.74497	4.7122	4.36716
ASHGA5P034511	0.0156306	0.0511636	2.25719	down	noncoding	uc002ndl.1	AK095546	UCSC_knowngene	2675	chr19	+	16210476	16213151		CTCCCAAATTTGGTGCTTGTTCCTTAGTATTCTGTGATGTTCTGCTGTAATTAAAAATAC	exon sense-overlapping	NM_001145160	TPM4	tropomyosin alpha-4 chain isoform 1	+	16178316	16213813	20.2026	75.1638	4.67373	5.84826	22.5934	27.6421	10.3724	77.5656	75.5109	72.4148	5.03348	4.87472	4.113	5.8146	5.96927	5.7609
ASHGA5P034511	0.0156306	0.0511636	2.25719	down	noncoding	uc002ndl.1	AK095546	UCSC_knowngene	2675	chr19	+	16210476	16213151		CTCCCAAATTTGGTGCTTGTTCCTTAGTATTCTGTGATGTTCTGCTGTAATTAAAAATAC	exon sense-overlapping	NM_003290	TPM4	tropomyosin alpha-4 chain isoform 2	+	16187134	16213813	20.2026	75.1638	4.67373	5.84826	22.5934	27.6421	10.3724	77.5656	75.5109	72.4148	5.03348	4.87472	4.113	5.8146	5.96927	5.7609
ASHGA5P035240	0.000238524	0.00476418	2.43573	down	noncoding	ENST00000442293	AC068491.1	GENCODE	546	chr2	-	112186899	112237838	ENST00000414030, ENST00000424617, ENST00000437561, ENST00000439494	TTAAACAGCTACACCACCAGAAGCCGAGAGAGAGGCTGGAACATAGCCTTCCCTTTGGAG	intergenic							258.11	765.502	8.06896	9.35331	253.892	329.133	191.307	757.359	680.102	859.044	8.20622	8.05925	7.94141	9.27167	9.29786	9.49042
ASHGA5P043165	0.00290685	0.0178262	2.0876	down	noncoding	TCONS_00018838	XLOC_008642	LincRNAs identified by Cabili et al	245	chr10	+	121992567	122047981		TGTATCTCTACTGCTGGTTTGAGTTCCTGTGTAAAGGCTCAGCTGTCCTTTACTTCCCAT	intergenic							13.0027	50.4261	4.17427	5.23611	9.7965	16.2064	13.0052	48.9834	51.4985	50.7965	3.922	4.17618	4.42462	5.10933	5.3709	5.2281
ASHGA5P023777	0.00454034	0.0235309	2.12786	down	noncoding	HMlincRNA346-	HMlincRNA346	LincRNAs identified by Khalil et al	8238	chr14	-	93595225	93603463		CCAGCCAAAAAGACAAACTGGACCCAAGGCTGCATGGACTGCTGTATACCTCCTCAGGAG	intergenic							13.3731	51.5961	4.17805	5.26746	9.16975	18.8578	12.0918	55.2598	52.0279	47.5007	3.83195	4.37472	4.32749	5.29404	5.38387	5.12446
ASHGA5P041443	0.00230619	0.0157311	2.38649	down	noncoding	AI127801		LincRNAs identified by Khalil et al	475	chr14	-	51898871	51899346		CAAAGGCAGCATTTCCGCTACTCTCTATCTTTTCAATAATGTAAATAAAGAACTGGATCA	intergenic							5	19.0282	2.45604	3.71093	5	5	5	21.7135	20.3502	15.0209	2.46913	2.40305	2.49594	3.84839	3.92961	3.35479
ASHGA5P017953	0.0134755	0.0465887	3.57503	down	noncoding	ENST00000447570	RP11-320G24.1	GENCODE	707	chrX	+	40122218	40126475		TGAGCCTAAGAAAGACGAATGCCCACTTTCGGATTCCATCTTCTGCCGCGGACGCATCCG	intergenic							7.27305	36.9209	2.90942	4.74737	5	11.8191	5	41.3245	30.8095	38.6286	2.46913	3.76319	2.49594	4.84993	4.57667	4.81552
ASHGA5P035572	0.0194469	0.0588126	2.07318	down	noncoding	ENST00000438551	ZBTB40-IT1	GENCODE	273	chr1	+	22843966	22846201		AAGGAATTAGTGATGCTCTGGGGAGTGTGCTGGAAATCCTCTACAGAGAATTAGAAAACT	intron sense-overlapping	NM_001083621	ZBTB40	zinc finger and BTB domain-containing protein 40	+	22778343	22857650	5.8989	23.0011	2.95556	4.00741	5	7.43724	5.25945	27.8255	21.3571	19.8206	2.46913	3.14386	3.25369	4.23663	4.00456	3.78103
ASHGA5P035572	0.0194469	0.0588126	2.07318	down	noncoding	ENST00000438551	ZBTB40-IT1	GENCODE	273	chr1	+	22843966	22846201		AAGGAATTAGTGATGCTCTGGGGAGTGTGCTGGAAATCCTCTACAGAGAATTAGAAAACT	intron sense-overlapping	NM_014870	ZBTB40	zinc finger and BTB domain-containing protein 40	+	22778343	22857650	5.8989	23.0011	2.95556	4.00741	5	7.43724	5.25945	27.8255	21.3571	19.8206	2.46913	3.14386	3.25369	4.23663	4.00456	3.78103
ASHGA5P000362	0.00199991	0.0144191	4.67955	down	noncoding	chr2:46288525-46300250+	chr2:46288525-46300250	LincRNAs identified by Khalil et al	11725	chr2	+	46435021	46446746		CTTTGCATGCTTCCTTTTTCTTAAGTCTTGCAACCTTGCACTGTTAGGTATCCAGTGCTT	intergenic							5.43888	42.5472	2.75142	4.97778	6.31665	5	5	41.1878	41.9208	44.533	3.35525	2.40305	2.49594	4.84507	5.0568	5.03148
ASHGA5P032951	0.00249768	0.0164612	2.60871	down	noncoding	ENST00000582896	RP11-746M1.8	pseudogene	145	chr17	+	20887214	20887359	ENST00000361297, ENST00000558027	GCCGCCGCCCGACCGCCGGGAGGATGGAGTTCAGCGGGCAGCGGAGCTGTCTCAGTCTTT								489.261	1496.59	8.924	10.3073	568.514	554.488	344.78	1549.98	1579.02	1360.76	9.27823	8.76115	8.73261	10.2984	10.4886	10.135
ASHGA5P026430	0.000199959	0.00442675	2.10954	down	noncoding	BG273004R		LincRNAs identified by Khalil et al	332	chr6	+	14168333	14168655		CATATAACAATAAATGAAACTGATAAAGGTGATGCTTTCGTGGACTTTATGTAGAGAGCC	intergenic							5	16.8912	2.45604	3.53297	5	5	5	16.8122	15.2303	18.6312	2.46913	2.40305	2.49594	3.43616	3.47571	3.68704
ASHGA5P028904	0.00281769	0.0175274	2.07376	down	noncoding	uc001vmc.3	BC045767	UCSC_knowngene	2894	chr13	+	95413194	95587664		TCTTTCCTCTGTGTTCGTCATTTTATCAAATTACTGGAAGCTGGGAGTTGAGGCCAAAAG	intergenic							15.1284	58.6282	4.39378	5.44603	15.2391	17.206	12.9401	70.3641	56.303	49.2174	4.51133	4.25238	4.41764	5.65884	5.50209	5.17715
ASHGA5P037244	0.00235389	0.0159255	2.16842	down	noncoding	TCONS_00025784	XLOC_012592	LincRNAs identified by Cabili et al	2543	chr17	-	80311629	80315022		ATCCTTGCTGTTCTGTCAAACACATCTGCAGATAACTTGAGTCCATCTAGGGTGGGTTTC	intergenic							23.1711	84.7651	4.90912	6.02576	17.8237	33.1378	18.5516	90.4357	89.0247	74.835	4.72664	5.10814	4.89256	6.04721	6.22086	5.80921
ASHGA5P041977	0.00010446	0.00338103	4.39694	down	noncoding	TCONS_00014836	XLOC_006904	LincRNAs identified by Cabili et al	665	chr8	+	117544536	117587427		AGGGATTTGGTTCTCTGTATGGAGATGCAGTCTGACAAGACAAGTTCACTGCAGTTCACA	intergenic							5	33.4902	2.45604	4.59254	5	5	5	39.0792	33.1315	28.2598	2.46913	2.40305	2.49594	4.76635	4.68731	4.32398
ASHGA5P028843	0.00472721	0.0240811	2.66208	down	noncoding	NR_046539	DIAPH3-AS1	RefSeq	467	chr13	+	60586884	60618490		GAGCATACTCTGATTTCACAGTTTTAACCATCATCCTGTGACCCCAAAAGTCCATCACAG	intronic antisense	NM_001258370	DIAPH3	protein diaphanous homolog 3 isoform g	-	60435387	60587343	16.243	72.789	4.38328	5.79584	14.4325	25.0571	9.23931	69.2181	75.4999	73.6489	4.43939	4.74841	3.96205	5.63334	5.96911	5.78508
ASHGA5P028843	0.00472721	0.0240811	2.66208	down	noncoding	NR_046539	DIAPH3-AS1	RefSeq	467	chr13	+	60586884	60618490		GAGCATACTCTGATTTCACAGTTTTAACCATCATCCTGTGACCCCAAAAGTCCATCACAG	intronic antisense	NM_030932	DIAPH3	protein diaphanous homolog 3 isoform b	-	60348296	60587343	16.243	72.789	4.38328	5.79584	14.4325	25.0571	9.23931	69.2181	75.4999	73.6489	4.43939	4.74841	3.96205	5.63334	5.96911	5.78508
ASHGA5P028843	0.00472721	0.0240811	2.66208	down	noncoding	NR_046539	DIAPH3-AS1	RefSeq	467	chr13	+	60586884	60618490		GAGCATACTCTGATTTCACAGTTTTAACCATCATCCTGTGACCCCAAAAGTCCATCACAG	natural antisense	NM_001042517	DIAPH3	protein diaphanous homolog 3 isoform a	-	60239722	60738119	16.243	72.789	4.38328	5.79584	14.4325	25.0571	9.23931	69.2181	75.4999	73.6489	4.43939	4.74841	3.96205	5.63334	5.96911	5.78508
ASHGA5P028843	0.00472721	0.0240811	2.66208	down	noncoding	NR_046539	DIAPH3-AS1	RefSeq	467	chr13	+	60586884	60618490		GAGCATACTCTGATTTCACAGTTTTAACCATCATCCTGTGACCCCAAAAGTCCATCACAG	natural antisense	NM_001258366	DIAPH3	protein diaphanous homolog 3 isoform c	-	60239720	60738119	16.243	72.789	4.38328	5.79584	14.4325	25.0571	9.23931	69.2181	75.4999	73.6489	4.43939	4.74841	3.96205	5.63334	5.96911	5.78508
ASHGA5P028843	0.00472721	0.0240811	2.66208	down	noncoding	NR_046539	DIAPH3-AS1	RefSeq	467	chr13	+	60586884	60618490		GAGCATACTCTGATTTCACAGTTTTAACCATCATCCTGTGACCCCAAAAGTCCATCACAG	natural antisense	NM_001258367	DIAPH3	protein diaphanous homolog 3 isoform d	-	60239720	60738119	16.243	72.789	4.38328	5.79584	14.4325	25.0571	9.23931	69.2181	75.4999	73.6489	4.43939	4.74841	3.96205	5.63334	5.96911	5.78508
ASHGA5P028843	0.00472721	0.0240811	2.66208	down	noncoding	NR_046539	DIAPH3-AS1	RefSeq	467	chr13	+	60586884	60618490		GAGCATACTCTGATTTCACAGTTTTAACCATCATCCTGTGACCCCAAAAGTCCATCACAG	natural antisense	NM_001258368	DIAPH3	protein diaphanous homolog 3 isoform e	-	60239720	60738119	16.243	72.789	4.38328	5.79584	14.4325	25.0571	9.23931	69.2181	75.4999	73.6489	4.43939	4.74841	3.96205	5.63334	5.96911	5.78508
ASHGA5P028843	0.00472721	0.0240811	2.66208	down	noncoding	NR_046539	DIAPH3-AS1	RefSeq	467	chr13	+	60586884	60618490		GAGCATACTCTGATTTCACAGTTTTAACCATCATCCTGTGACCCCAAAAGTCCATCACAG	natural antisense	NM_001258369	DIAPH3	protein diaphanous homolog 3 isoform f	-	60348296	60738119	16.243	72.789	4.38328	5.79584	14.4325	25.0571	9.23931	69.2181	75.4999	73.6489	4.43939	4.74841	3.96205	5.63334	5.96911	5.78508
ASHGA5P019978	0.0176862	0.0553579	2.52815	down	noncoding	ENST00000506196	RP11-79P5.5	GENCODE	440	chr5	-	72750011	72768721		TTAGCAGAGGAGATAGTGTGACTTGTAGACAGCTGCATCCCTAGAGTTACTTTAGAGAGC	intergenic							5.23982	24.2823	2.74369	4.08177	5	5	5.71947	29.3117	18.6883	24.8468	2.46913	2.40305	3.35888	4.32261	3.79865	4.12406
ASHGA5P015076	0.00352344	0.0199973	2.08698	down	noncoding	ENST00000416352	RP1-76B20.11	GENCODE	590	chr22	-	30101244	30115848		GGAGCAGCAGGCCTGCCAGATAAACGCAAATGTTATGGGACATCATCCCTTCTGGTGGCT	bidirectional	NM_182527	CABP7	calcium-binding protein 7	+	30116343	30127820	13.9931	54.637	4.29437	5.35579	13.2446	14.038	14.6967	58.07	52.1748	53.6661	4.31955	3.98688	4.57667	5.36726	5.38893	5.31117
ASHGA5P030247	0.000529065	0.00703064	2.38158	down	noncoding	ENST00000565547	RP11-326A19.3	GENCODE	450	chr15	-	89630308	89631172		AACCCATTCCCCATTCTGAAGGTGTAGACATCACAGAGTGTGGACAGAAATAGCTTCTCA	intronic antisense	ENST00000569411	ABHD2	abhydrolase domain containing 2 [Source:HGNC Symbol;Acc:18717]	+	89630689	89698621	30.9513	123.18	5.33389	6.58582	29.4048	36.9297	26.5195	142.351	119.141	108.047	5.37973	5.24827	5.37368	6.7377	6.66076	6.35899
ASHGA5P056402	0.0265635	0.0724946	2.10337	down	noncoding	TCONS_00003950	XLOC_001767	LincRNAs identified by Cabili et al	224	chr2	+	177708258	177711096		TTCTTATTGTCACCTTGCATTTGCTAGGTCTTTGAGTTCTGATTGTGGCAATTAGCTTTA	intergenic							5	17.2708	2.45604	3.52874	5	5	5	20.1549	20.5305	11.127	2.46913	2.40305	2.49594	3.72448	3.94332	2.91843
ASHGA5P043871	0.00019061	0.00432365	3.24958	down	noncoding	ENST00000424404	RP11-560I19.4	GENCODE	679	chr7	+	121946934	121948611		TAAGACTTTAATTGCTGACTTTTGGGCCGGATCAGATTCCTTTTCCTACCTGCCACTTCC	intronic antisense	ENST00000418046	FEZF1	FEZ family zinc finger 1 [Source:HGNC Symbol;Acc:22788]	-	121944384	121950745	33.9114	177.94	5.45298	7.15323	35.0934	39.243	27.3978	191.434	180.044	162.34	5.61177	5.32779	5.41938	7.18804	7.30286	6.96879
ASHGA5P044159	0.0286046	0.0761474	2.1578	down	noncoding	TCONS_00018503	XLOC_008811	LincRNAs identified by Cabili et al	1250	chr10	-	48513635	48517295	TCONS_00018500, TCONS_00018501, TCONS_00018502	TATCCTGTCAGCTTGTTTTTTGTCTCTTTGGTGACCAGACATGAACCCCTCAAGGCTGTT	intergenic							21.5008	81.296	4.84582	5.95538	16.7718	20.8621	26.8686	84.3655	92.4689	67.0536	4.64429	4.50074	5.39243	5.94337	6.27763	5.64512
ASHGA5P057627	0.000502714	0.0068801	2.81337	down	noncoding	TCONS_00019803	XLOC_009602	LincRNAs identified by Cabili et al	976	chr11	-	129652924	129684687		AGTCCTGCCGGTTTTTTCTCAGTTGACTGCATTACTTTACTGTGTTTCAACACTCCTGGC	intergenic							21.4697	104.016	4.83787	6.33017	23.5583	24.8447	16.006	115.258	100.788	96.0032	5.08926	4.73683	4.68753	6.40299	6.3991	6.18843
ASHGA5P045501	0.00832617	0.0344776	3.12051	down	noncoding	ENST00000436510	RP11-65J3.3	GENCODE	1846	chr9	-	132192930	132209569		GCCACAAAAACATCATCAGTAGGTACTTTGGAGAGGTTATTGTTACTTTCCCCTTTTATG	intergenic							11.3878	61.0017	3.87572	5.5175	5.71295	18.7076	9.7429	67.5129	56.2038	59.2884	3.23097	4.36147	4.03471	5.59574	5.49836	5.45839
ASHGA5P041964	0.00085008	0.00894309	2.64624	down	noncoding	TCONS_00020970	XLOC_010240	LincRNAs identified by Cabili et al	394	chr12	-	126630052	126650670		ACTTCAGAATGCCATTTCCTGAGCCCTGCTAAGTCAATTTAAGCAGATTCTCAGCTCCTG	intergenic							16.603	77.7261	4.4916	5.89555	17.7351	20.2853	11.7887	86.1079	77.2505	69.82	4.72009	4.46432	4.29039	5.97682	6.00191	5.70791
ASHGA5P058678	5.70459e-05	0.00267463	2.67393	down	noncoding	uc.201+	uc.201	UCR	240	chr6	+	100051983	100052223		AATTTCATTTAATTTTCCATCCCATTTGCTGCACAGCCCGCTTTTACTTTTAACACCCAG	intergenic							42.8479	178.401	5.7368	7.15577	39.6435	56.506	32.3943	173.179	170.425	191.6	5.77446	5.79352	5.64243	7.02902	7.22	7.21828
ASHGA5P058000	3.10681e-06	0.000948742	2.4692	down	noncoding	TCONS_00024861	XLOC_011753	LincRNAs identified by Cabili et al	866	chr16	+	65171565	65172724		CTTAGGTATGACCTACCACTACTATGAAGCCTTTACTGAATTCGCTGGTTCCTGAGGTTT	intergenic							5	19.4736	2.45604	3.76009	5	5	5	21.1489	18.0784	19.1934	2.46913	2.40305	2.49594	3.80277	3.74403	3.73346
ASHGA5P020984	0.000307605	0.00536579	2.09234	down	noncoding	ENST00000523063	RP11-317N12.1	GENCODE	766	chr8	+	33462373	33896003		AACTTCTCAGGCCCTCTGTGCATGCCATGCTTAATAAGGTAATAAAAAGGTAAGATTATA	intergenic							45.9994	150.662	5.83228	6.8974	46.0381	58.5314	33.4286	153.013	146.113	152.859	5.97085	5.84225	5.68373	6.84229	6.96969	6.88021
ASHGA5P045812	4.33872e-05	0.00237204	2.25228	down	noncoding	ENST00000421297	RP5-1050E16.2	GENCODE	916	chr9	+	92501141	92523200		CATCTGTGTATTGACCATCTACCCTTTTCCCATGATTTGTTTGTCAAAATTCCTTGCTAA	intergenic							85.7729	277.547	6.65568	7.82707	79.5839	103.008	74.7264	301.337	255.986	275.318	6.68553	6.5547	6.7268	7.87683	7.83739	7.76699
ASHGA5P056831	0.00526018	0.025722	2.53379	down	noncoding	TCONS_00009176	XLOC_004182	LincRNAs identified by Cabili et al	462	chr4	-	178134765	178148161		TAAGATTCATAATCGACAAAGTATTAAAGGGAGCCTAGTCTGTGTCAGCTACCATCTGGC	intergenic							5.46026	22.6126	2.64233	3.98363	5	6.38079	5	21.4942	26.6347	19.7088	2.46913	2.96192	2.49594	3.82989	4.34798	3.77302
ASHGA5P041010	0.0001363	0.00374918	2.41148	down	noncoding	TCONS_00022001	XLOC_010601	LincRNAs identified by Cabili et al	1443	chr13	-	48464984	48466696		CAGTAGACAGAAGCAAAGCATATTCCCTCCTCTCAAAGAGTTCTACATGGTACACTGCAG	intergenic							292.245	850.578	8.23787	9.50779	236.318	380.94	259.479	830.053	795.932	925.748	8.10811	8.26545	8.34005	9.40431	9.52238	9.59668
ASHGA5P053114	0.000661622	0.00782582	5.38008	down	noncoding	uc022aft.1	NCF1	UCSC_knowngene	271	chr7	+	72639489	72639760		AACTACAAATATTCCTTCACGTCTTCTTGTCTTTTTAATGTTTAGAAAACCTTAAAAGAA	intergenic							5.75965	54.9871	2.93666	5.36429	5	6.78881	5.49014	59.8164	53.5893	51.5556	2.46913	3.03239	3.30846	5.41173	5.42827	5.25287
ASHGA5P023836	0.000571033	0.00734068	2.09734	down	noncoding	HMlincRNA617+	HMlincRNA617	LincRNAs identified by Khalil et al	2718	chr8	+	49776604	49779322		AAGGTATTGTCTTGTGATCTCCTTTCCATCCTTGAGGCTTCGTAATTAAGCTCTGCGCTG	intergenic							390.681	961.004	8.60732	9.67588	312.239	545.08	314.723	954.754	829.206	1099.05	8.47587	8.73326	8.61282	9.61113	9.58657	9.82994
ASHGA5P023052	0.000165553	0.00409598	3.5414	down	noncoding	ENST00000568619	RP11-80F22.10	GENCODE	1211	chr16	-	34681268	34683395		CATCATTCAGGCACCTCATATCTCACCCTGGAAACAAGCCATATGAATGTGAAGAAAATA	intergenic							16.6418	102.618	4.48167	6.30599	12.3533	22.3971	15.1749	109.338	88.9891	109.526	4.23131	4.59465	4.61904	6.32149	6.2205	6.37597
ASHGA5P043102	0.00813966	0.0340078	2.43037	down	noncoding	ENST00000450353	GS1-124K5.3	GENCODE	699	chr7	-	65956082	65958525	ENST00000412091	TTGACAAACTCCGACCCAGCACAGTGTTTCTGTGGGTCAAAACTAGAAAACTATGTCCAG	intergenic							5.14045	22.4799	2.68899	3.97017	5.42135	5	5	25.5981	18.3387	23.5028	3.16797	2.40305	2.49594	4.10646	3.76667	4.03736
ASHGA5P039161	0.0197577	0.0594693	2.63565	down	noncoding	ENST00000423466	RP11-114M1.1	GENCODE	571	chr3	+	177401414	177409022		GAACTGCATGCAGTTAAGCCGTATAACCTCTCTGATTTTTAGTTTCTCCATCTATTTTAT	intergenic							16.4718	73.38	4.39712	5.79527	18.8137	22.5119	8.08967	62.2962	87.4357	70.4081	4.79482	4.60168	3.79485	5.47319	6.19174	5.72089
ASHGA5P058127	0.0379923	0.0926016	2.11746	down	noncoding	TCONS_00026719	XLOC_012851	LincRNAs identified by Cabili et al	791	chr18	-	53727806	53735555		GTGACCCCGGGAATGCACTTGGTAAATAGGAGTTCAATAACTGTTTGTTGAAGAAAGAAA	intron sense-overlapping	ENST00000382897	AC006305.1	HCG2045177; Uncharacterized protein; cDNA FLJ45743 fis, clone KIDNE2016464 [Source:UniProtKB/TrEMBL;Acc:Q6ZS83]	-	53670843	53858493	5.30084	19.6465	2.61428	3.69661	5	5.90253	5	29.1716	16.3011	13.4667	2.46913	2.87776	2.49594	4.31569	3.58164	3.19251
ASHGA5P035684	5.53995e-06	0.0011092	4.37254	down	noncoding	ENST00000426976	AC093390.1	GENCODE	3403	chr2	+	1828183	1832439		GTCATGGCCGTCAGCCTATTCTCGCTAATCTTCCATTAAATGAGATGACTGATTTAAAAA	intronic antisense	NM_015025	MYT1L	myelin transcription factor 1-like protein	-	1792884	2335045	5	32.9533	2.45604	4.58451	5	5	5	32.9626	33.4534	32.4438	2.46913	2.40305	2.49594	4.50636	4.70255	4.54462
ASHGA5P027608	0.00838639	0.0346323	2.0242	down	noncoding	ENST00000549373	RP11-115H15.2	GENCODE	493	chr12	-	116612306	116619100		AGGATGTGTACAGGTTAGATTTCGAGGGGACTGTTTTCTGTTTAAGAAGTAACTCATTTT	intron sense-overlapping	NM_015335	MED13L	mediator of RNA polymerase II transcription subunit 13-like	-	116396380	116714991	748.307	1680.94	9.45328	10.4706	534.693	1151.83	558.4	1620.08	1420.21	2002.53	9.20105	9.79308	9.36571	10.364	10.3493	10.6986
ASHGA5P057489	6.12911e-06	0.00116829	3.47248	down	noncoding	TCONS_00018301	XLOC_008577	LincRNAs identified by Cabili et al	264	chr10	+	100995868	100996402		TTTTTTAACTTTTTAAAGCGTCAGGCACTTCGTCCGCTCAGGGCCCTTTTCTGGTTGAAG	intergenic							5	26.6899	2.45604	4.25201	5	5	5	26.6564	24.8537	28.5595	2.46913	2.40305	2.49594	4.16836	4.24608	4.34158
ASHGA5P023607	0.00885932	0.0358781	3.12863	down	noncoding	HMlincRNA1049-	HMlincRNA1049	LincRNAs identified by Khalil et al	8045	chr1	-	108070019	108078064		AAAAGTTAGAAGGTTGTGTGGTCTCAGAAGACTGGTTTGCCATTTTAGGTGGCCACACTA	intergenic							6.8887	37.0227	3.11108	4.75661	7.88967	7.77644	5	41.899	36.1059	33.0633	3.63798	3.19932	2.49594	4.87021	4.82586	4.57377
ASHGA5P026701	0.000931933	0.00937838	4.07645	down	noncoding	AI263816		LincRNAs identified by Khalil et al	416	chr6	+	109006489	109006903		TTCACTTGAGATTACTTCCCAATTTTTATTCTGTCTTCCAGAGGATTAAAGATGGAACTC	intergenic							5	31.3358	2.45604	4.48336	5	5	5	25.5758	37.8524	30.5792	2.46913	2.40305	2.49594	4.10542	4.89792	4.44672
ASHGA5P020330	0.00020531	0.00446416	2.25842	down	noncoding	ENST00000511707	RP11-267A15.1	GENCODE	564	chr5	+	173930817	173947668		ATAAATATTCGTTGCTTCCTGAGAACCCCACTGCGGATGAGAACAAACGTTTGTTCGGCT	intergenic							15.9249	64.5787	4.43312	5.60843	13.8767	21.2566	12.6414	70.1625	64.3622	59.2113	4.38476	4.52635	4.38824	5.65408	5.71459	5.45662
ASHGA5P041080	0.0119879	0.0434069	3.04299	down	noncoding	ENST00000510987	CTD-2013M15.1	GENCODE	563	chr5	+	45890317	45896072		GTGAGAGATCCAGAAGATACTTCTACAATTTCCCTTCAGTTACATATGGACACTTTAATA	intergenic							11.0739	57.926	3.83171	5.4372	5.30733	18.2289	9.68562	55.7077	52.3278	65.7426	3.14095	4.32664	4.02754	5.30549	5.39316	5.61294
ASHGA5P044915	0.00109618	0.0101544	5.10587	down	noncoding	ENST00000522132	RP11-68L18.1	GENCODE	362	chr8	+	91660975	91668826		CTTGAATTATACGATGTTCTTATCTCTTGCGGGGCTGTTGAAATAATCAAATCTTTGTAC	intronic antisense	ENST00000519519	TMEM64	transmembrane protein 64 [Source:HGNC Symbol;Acc:25441]	-	91637898	91803859	6.27039	55.0396	3.0155	5.36765	5	8.68115	5.13002	55.6479	54.852	54.619	2.46913	3.35103	3.22633	5.3036	5.46323	5.33613
ASHGA5P044915	0.00109618	0.0101544	5.10587	down	noncoding	ENST00000522132	RP11-68L18.1	GENCODE	362	chr8	+	91660975	91668826		CTTGAATTATACGATGTTCTTATCTCTTGCGGGGCTGTTGAAATAATCAAATCTTTGTAC	intronic antisense	ENST00000521852	TMEM64	transmembrane protein 64 [Source:HGNC Symbol;Acc:25441]	-	91643793	91803860	6.27039	55.0396	3.0155	5.36765	5	8.68115	5.13002	55.6479	54.852	54.619	2.46913	3.35103	3.22633	5.3036	5.46323	5.33613
ASHGA5P027559	0.0130418	0.045548	2.25601	down	noncoding	ENST00000548419	RP11-554D14.1	pseudogene	973	chr12	-	108305101	108306074		ATGCCCAGAAATCAGAAGTCAGATTGAACAAGAAATCCCAGCCTTTCTAGGTGAGCTCCT								8.78348	38.4938	3.64025	4.81402	11.1695	9.48213	5.69882	41.8651	41.4692	32.1471	4.09654	3.46942	3.35479	4.86954	5.04295	4.52958
ASHGA5P047301	0.00153514	0.0122999	2.0689	down	noncoding	ENST00000416554	RP5-1092A11.2	GENCODE	351	chr1	-	3628763	3630862		ACTCTTGTTTCCCCTAATAATCCACGTTTCATCTCCACAATAAACATTGTTAGAACTCTT	intronic antisense	NM_001126240	TP73	tumor protein p73 isoform b	+	3607235	3652765	38.4489	129.038	5.60898	6.65785	38.147	47.7875	29.4121	129.496	138.864	118.753	5.72504	5.58455	5.51737	6.58172	6.89635	6.49547
ASHGA5P047301	0.00153514	0.0122999	2.0689	down	noncoding	ENST00000416554	RP5-1092A11.2	GENCODE	351	chr1	-	3628763	3630862		ACTCTTGTTTCCCCTAATAATCCACGTTTCATCTCCACAATAAACATTGTTAGAACTCTT	intronic antisense	NM_001126241	TP73	tumor protein p73 isoform c	+	3607235	3652765	38.4489	129.038	5.60898	6.65785	38.147	47.7875	29.4121	129.496	138.864	118.753	5.72504	5.58455	5.51737	6.58172	6.89635	6.49547
ASHGA5P047301	0.00153514	0.0122999	2.0689	down	noncoding	ENST00000416554	RP5-1092A11.2	GENCODE	351	chr1	-	3628763	3630862		ACTCTTGTTTCCCCTAATAATCCACGTTTCATCTCCACAATAAACATTGTTAGAACTCTT	intronic antisense	NM_001126242	TP73	tumor protein p73 isoform d	+	3607235	3652765	38.4489	129.038	5.60898	6.65785	38.147	47.7875	29.4121	129.496	138.864	118.753	5.72504	5.58455	5.51737	6.58172	6.89635	6.49547
ASHGA5P047301	0.00153514	0.0122999	2.0689	down	noncoding	ENST00000416554	RP5-1092A11.2	GENCODE	351	chr1	-	3628763	3630862		ACTCTTGTTTCCCCTAATAATCCACGTTTCATCTCCACAATAAACATTGTTAGAACTCTT	intronic antisense	NM_001204184	TP73	tumor protein p73 isoform h	+	3569128	3652765	38.4489	129.038	5.60898	6.65785	38.147	47.7875	29.4121	129.496	138.864	118.753	5.72504	5.58455	5.51737	6.58172	6.89635	6.49547
ASHGA5P047301	0.00153514	0.0122999	2.0689	down	noncoding	ENST00000416554	RP5-1092A11.2	GENCODE	351	chr1	-	3628763	3630862		ACTCTTGTTTCCCCTAATAATCCACGTTTCATCTCCACAATAAACATTGTTAGAACTCTT	intronic antisense	NM_001204185	TP73	tumor protein p73 isoform i	+	3569128	3652765	38.4489	129.038	5.60898	6.65785	38.147	47.7875	29.4121	129.496	138.864	118.753	5.72504	5.58455	5.51737	6.58172	6.89635	6.49547
ASHGA5P047301	0.00153514	0.0122999	2.0689	down	noncoding	ENST00000416554	RP5-1092A11.2	GENCODE	351	chr1	-	3628763	3630862		ACTCTTGTTTCCCCTAATAATCCACGTTTCATCTCCACAATAAACATTGTTAGAACTCTT	intronic antisense	NM_001204186	TP73	tumor protein p73 isoform j	+	3569128	3652765	38.4489	129.038	5.60898	6.65785	38.147	47.7875	29.4121	129.496	138.864	118.753	5.72504	5.58455	5.51737	6.58172	6.89635	6.49547
ASHGA5P047301	0.00153514	0.0122999	2.0689	down	noncoding	ENST00000416554	RP5-1092A11.2	GENCODE	351	chr1	-	3628763	3630862		ACTCTTGTTTCCCCTAATAATCCACGTTTCATCTCCACAATAAACATTGTTAGAACTCTT	intronic antisense	NM_001204187	TP73	tumor protein p73 isoform k	+	3569128	3652765	38.4489	129.038	5.60898	6.65785	38.147	47.7875	29.4121	129.496	138.864	118.753	5.72504	5.58455	5.51737	6.58172	6.89635	6.49547
ASHGA5P047301	0.00153514	0.0122999	2.0689	down	noncoding	ENST00000416554	RP5-1092A11.2	GENCODE	351	chr1	-	3628763	3630862		ACTCTTGTTTCCCCTAATAATCCACGTTTCATCTCCACAATAAACATTGTTAGAACTCTT	intronic antisense	NM_001204188	TP73	tumor protein p73 isoform l	+	3569128	3652765	38.4489	129.038	5.60898	6.65785	38.147	47.7875	29.4121	129.496	138.864	118.753	5.72504	5.58455	5.51737	6.58172	6.89635	6.49547
ASHGA5P047301	0.00153514	0.0122999	2.0689	down	noncoding	ENST00000416554	RP5-1092A11.2	GENCODE	351	chr1	-	3628763	3630862		ACTCTTGTTTCCCCTAATAATCCACGTTTCATCTCCACAATAAACATTGTTAGAACTCTT	intronic antisense	NM_001204189	TP73	tumor protein p73 isoform e	+	3607235	3652765	38.4489	129.038	5.60898	6.65785	38.147	47.7875	29.4121	129.496	138.864	118.753	5.72504	5.58455	5.51737	6.58172	6.89635	6.49547
ASHGA5P047301	0.00153514	0.0122999	2.0689	down	noncoding	ENST00000416554	RP5-1092A11.2	GENCODE	351	chr1	-	3628763	3630862		ACTCTTGTTTCCCCTAATAATCCACGTTTCATCTCCACAATAAACATTGTTAGAACTCTT	intronic antisense	NM_001204190	TP73	tumor protein p73 isoform f	+	3607235	3652765	38.4489	129.038	5.60898	6.65785	38.147	47.7875	29.4121	129.496	138.864	118.753	5.72504	5.58455	5.51737	6.58172	6.89635	6.49547
ASHGA5P047301	0.00153514	0.0122999	2.0689	down	noncoding	ENST00000416554	RP5-1092A11.2	GENCODE	351	chr1	-	3628763	3630862		ACTCTTGTTTCCCCTAATAATCCACGTTTCATCTCCACAATAAACATTGTTAGAACTCTT	intronic antisense	NM_001204191	TP73	tumor protein p73 isoform g	+	3607235	3652765	38.4489	129.038	5.60898	6.65785	38.147	47.7875	29.4121	129.496	138.864	118.753	5.72504	5.58455	5.51737	6.58172	6.89635	6.49547
ASHGA5P047301	0.00153514	0.0122999	2.0689	down	noncoding	ENST00000416554	RP5-1092A11.2	GENCODE	351	chr1	-	3628763	3630862		ACTCTTGTTTCCCCTAATAATCCACGTTTCATCTCCACAATAAACATTGTTAGAACTCTT	intronic antisense	NM_001204192	TP73	tumor protein p73 isoform m	+	3614609	3652765	38.4489	129.038	5.60898	6.65785	38.147	47.7875	29.4121	129.496	138.864	118.753	5.72504	5.58455	5.51737	6.58172	6.89635	6.49547
ASHGA5P047301	0.00153514	0.0122999	2.0689	down	noncoding	ENST00000416554	RP5-1092A11.2	GENCODE	351	chr1	-	3628763	3630862		ACTCTTGTTTCCCCTAATAATCCACGTTTCATCTCCACAATAAACATTGTTAGAACTCTT	intronic antisense	NM_005427	TP73	tumor protein p73 isoform a	+	3569128	3652765	38.4489	129.038	5.60898	6.65785	38.147	47.7875	29.4121	129.496	138.864	118.753	5.72504	5.58455	5.51737	6.58172	6.89635	6.49547
ASHGA5P020662	0.00100348	0.00975309	5.15185	down	noncoding	ENST00000518129	CTB-118P15.2	GENCODE	647	chr8	+	88986392	89031341		CTTCACATGGTTAGGTGGAAACATCATTGATGCAGGATTTTTCTTTGTCTCCTTACCAGT	intergenic							9.29999	83.1189	3.63601	6.0011	5.47838	15.3961	7.02555	84.6218	83.8113	80.9237	3.1807	4.10646	3.62086	5.94992	6.12849	5.92488
ASHGA5P021011	0.0041774	0.0223195	2.35196	down	noncoding	ENST00000523342	RP11-89M20.2	GENCODE	387	chr8	-	35861837	35951527		TAAAATCAAGGTGTCCACAGCAGTCATTATTCTACCCACCAGAGACACAGAAGCTTGTCC	intergenic							17.1671	68.2779	4.45797	5.69183	12.3345	27.4717	11.695	69.9677	61.4909	73.3751	4.22838	4.86706	4.27846	5.65093	5.64412	5.78043
ASHGA5P041297	0.000153536	0.00398469	2.36094	down	noncoding	ENST00000515563	CTC-459M5.2	GENCODE	588	chr5	+	111527716	111532693		AGCAGCCTCCAGATGTAACTCTTTCATCTTCCTGCTACCAAAAATAAAAACTTACCAACA	natural antisense	NM_022140	EPB41L4A	band 4.1-like protein 4A	-	111498314	111755010	32.9956	127.145	5.39658	6.63594	27.1307	44.5696	27.2866	141.956	118.861	120.619	5.27966	5.4963	5.41377	6.73201	6.65743	6.51838
ASHGA5P039654	0.00368663	0.0205795	2.51635	down	noncoding	ENST00000504785	RP11-18H21.3	GENCODE	448	chr4	-	153143619	153146551		CCAAGTATGGGTCACCTTCCTTATGTAAATTTCCTCTTGGGACTGTATTTTCTTTTAAAT	intergenic							18.6799	80.4994	4.61882	5.95015	20.9588	23.5835	11.4973	81.6997	84.0318	75.7668	4.93759	4.66327	4.2556	5.88966	6.13235	5.82845
ASHGA5P023226	0.00809011	0.0338633	2.3023	down	noncoding	ENST00000574540	U91319.1	GENCODE	400	chr16	+	13444411	13656769		GGATCTTCAGGTAACAGAATATTGGCATGTAGCACTCCTCAAAACATAGAAAGCAGAAAC	intergenic							5.81156	21.3752	2.70282	3.9059	5	7.4347	5	20.6734	23.0067	20.4456	2.46913	3.1434	2.49594	3.76587	4.12073	3.83109
ASHGA5P052138	0.0046638	0.0238755	4.23983	down	noncoding	ENST00000509866	RP11-471J12.1	GENCODE	642	chr4	+	174451612	174458842	ENST00000502896, uc003itj.3	CTGAATTCCTTGCTGGTACTGTCACTTATATTCTTTTGGGTAGATCTCTGGGCATGCATA	bidirectional	NM_021973	HAND2	heart- and neural crest derivatives-expressed protein 2	-	174447651	174451378	7.29362	49.4114	3.1201	5.20411	5.13044	11.7504	5	50.5488	48.1609	49.5244	3.10844	3.75592	2.49594	5.15952	5.26764	5.18517
ASHGA5P046989	0.00409096	0.0220103	3.60315	down	noncoding	TCONS_00015067	XLOC_007145	LincRNAs identified by Cabili et al	438	chr8	-	88937963	88938489		TTACAGTCTTTAAGAATGAAAGTCCAGGCTCTTCAATCACACTTTGCTGATATGGATGAG	intergenic							6.80804	41.6746	3.09497	4.94423	6.9923	8.43183	5	44.6685	42.0399	38.3154	3.47714	3.31182	2.49594	4.97017	5.06078	4.80172
ASHGA5P039919	1.40292e-05	0.00152133	2.81237	down	noncoding	ENST00000562284	RP11-731J8.2	GENCODE	7000	chr4	+	47433976	47440976		AAGACCTCCAACTTCCAAATTAATTCTCTCCCTTGAGAAAGAATGTGTTGACAATAAAAC	intergenic							71.9584	287.95	6.39389	7.88568	60.0075	98.9977	56.87	298.845	266.069	298.935	6.31132	6.50433	6.36602	7.86382	7.89411	7.89912
ASHGA5P031293	0.000229689	0.00470965	2.48906	down	noncoding	ENST00000429810	RP11-252A24.2	GENCODE	2355	chr16	-	74371841	74402138		TTAGGAAACTTTGCATATTTATTGAATGCCTTTTGTTTTTCATCTTCAAAACTGATTCCT	intergenic							15.2761	69.1064	4.39642	5.71202	13.631	19.0503	13.147	73.3101	71.7094	62.2997	4.36086	4.38781	4.44059	5.71768	5.88564	5.53275
ASHGA5P040671	0.0162496	0.0523764	2.81238	down	noncoding	uc001eqi.1	AK023809	UCSC_knowngene	4435	chr1	+	147751385	147763966		GTCGACTTCCCGATAACTTTAGATCCTGAAACCTCACAGGATTTTTCTTCTCTTCCCTTT	intergenic							14.7943	66.3114	4.14995	5.64174	9.18116	27.3869	7.81499	61.9115	60.5793	76.4433	3.8331	4.86309	3.75367	5.46397	5.61917	5.84209
ASHGA5P027388	0.0129564	0.0453544	2.54711	down	noncoding	ENST00000551729	RP11-1022B3.1	GENCODE	470	chr12	-	63686408	63753817		CAATGGCATTCTGGTGTTTTACTTTTGTGTTAAATATGTCTCTACTTGAAGGGGAAATGT	intergenic							5.37577	22.9132	2.62926	3.97813	5	6.12732	5	16.8275	27.0622	24.8497	2.46913	2.92272	2.49594	3.43741	4.37259	4.12438
ASHGA5P000577	0.00562767	0.0268309	7.42789	down	noncoding	D16471		NRED	2448	chrX	-	136921685	136924122		ACTAGAAGTCATCAACTTAACTGATTTTATTTCTCACTGCTAATCTTCCAGGTTCTGAAG	intergenic							8.38591	78.3686	3.01616	5.90911	5	15.1577	5	82.6546	74.3223	78.1288	2.46913	4.0834	2.49594	5.91107	5.94194	5.87432
ASHGA5P058941	0.000306968	0.00536579	3.13272	down	noncoding	uc.339+	uc.339	UCR	252	chr12	+	54071095	54071347		ATTTATATGGGCCCGTTATTTCACACCGATCCTCCATCTGCATTTTTATGGCCCTGAGCT	intronic antisense	ENST00000338662	ATP5G2	ATP synthase, H+ transporting, mitochondrial Fo complex, subunit C2 (subunit 9) [Source:HGNC Symbol;Acc:842]	-	54058985	54071182	24.3936	126.757	4.98634	6.63376	25.6248	31.0294	16.5264	132.317	121.419	126.536	5.20363	5.02488	4.73052	6.61876	6.6904	6.59212
ASHGA5P031111	0.0138708	0.0474503	3.34407	down	noncoding	ENST00000562604	RP11-56L13.7	GENCODE	262	chr16	-	32261940	32265743	ENST00000569850	GCAACTGAGTGACGTGCATAATTCTCTCCAAAGTAAAAGTCCTTTTTGTTTTTTGCAATT	intronic antisense	NM_001243722	LOC729264	TP53-target gene 3 protein-like	+	32264649	32267243	6.68159	39.2272	3.06156	4.80317	5.77706	9.26773	5	44.4003	46.8329	26.4485	3.2469	3.44185	2.49594	4.96211	5.22505	4.22235
ASHGA5P050562	0.00115232	0.0104387	3.15258	down	noncoding	ENST00000454490	ANKRD36BP2	GENCODE	2110	chr2	+	89100446	89106125		GCTCTGCCTATGTATCTTTTCCTGCTGTCTCTTAAAAGGAAAGATTTTGTCAACTAAAAA	intergenic							21.238	112.83	4.79697	6.4535	22.1851	27.7434	13.7854	101.831	119.402	117.256	5.00898	4.88013	4.5018	6.21848	6.66412	6.47791
ASHGA5P029632	6.00555e-05	0.00270648	4.46109	down	noncoding	ENST00000553791	RP11-718G2.5	GENCODE	448	chr14	+	70742012	70758576		AATCTGGAATATTTCAAGATAAGGTCCAATTCTTCCATTGTCTCGTAATCCAATGCAGAG	intergenic							5.17994	36.6629	2.58957	4.74696	5	5.53982	5	39.7613	35.8849	34.3424	2.46913	2.80363	2.49594	4.7929	4.81627	4.63171
ASHGA5P039733	0.00306356	0.0183945	2.0168	down	noncoding	NR_037867	LOC731424	RefSeq	3390	chr4	-	185764449	185768200		AAATCTATGGCTTCTGCTTCTTGGAGGACCCAGATTATCACAGCTTATCTCATTCCTTTG	intergenic							41.3881	131.501	5.67974	6.69182	44.9376	51.8163	27.4105	138.66	128.671	127.173	5.93705	5.68219	5.42	6.69279	6.78196	6.6007
ASHGA5P030113	0.00880042	0.0357204	2.21183	down	noncoding	ENST00000563057	RP11-315D16.4	GENCODE	396	chr15	-	68560129	68570332		ATGAGCAGAATTTGCCATGCCTTCCATGGAGCATTCTTTTTCCAAGTCAGGTCAATCCAG	natural antisense	NM_015322	FEM1B	protein fem-1 homolog B	+	68570140	68583640	8.01376	35.4043	3.55203	4.69727	9.27395	7.26734	7.5	34.1256	36.7612	35.3261	3.84457	3.11151	3.7	4.56189	4.85429	4.67562
ASHGA5P000336	0.00245359	0.0162818	2.37338	down	noncoding	chr2:142652025-142668175+	chr2:142652025-142668175	LincRNAs identified by Khalil et al	16150	chr2	+	142935555	142951705		TTAGGATGCAGACATTTTAGTTAGGGAGTAGTTCTATTTTACTTGATCTCTTGGCTGATA	intergenic							5	18.9295	2.45604	3.70299	5	5	5	20.6051	21.0616	15.1219	2.46913	2.40305	2.49594	3.76086	3.98439	3.36371
ASHGA5P016510	0.000193816	0.00435732	2.0865	down	noncoding	ENST00000431145	ZFY-AS1	GENCODE	419	chrY	-	2869668	2870612		GAGGCTAAAGTCCTGTCAACCATCATCTACATACTGTCTCCCTGAATTTGACTATTCCAG	intergenic							149.181	414.289	7.37248	8.43357	135.341	183.892	128.31	455.118	398.908	388.842	7.39493	7.28713	7.43539	8.5121	8.48954	8.29907
ASHGA5P048278	0.00843331	0.034775	2.54465	down	noncoding	ENST00000524987	ANO1-AS1	GENCODE	646	chr11	-	70033893	70034615		AGAAAGGAAAATGTCCTATCAGAAAGTGGTCCTCCATGTTTGCAGAAAACCCAGGACCCA	natural antisense	NM_018043	ANO1	anoctamin-1	+	69924407	70035652	12.6825	60.3851	4.15654	5.50401	12.8308	10.6795	14.5371	66.0424	56.6943	58.4187	4.28025	3.62807	4.5613	5.56206	5.51122	5.43875
ASHGA5P052073	0.0184117	0.0568964	2.06982	down	noncoding	ENST00000444515	LINC00302	GENCODE	302	chr1	+	152627952	152629280		GAAGTTTGGATGTGATTGCTCTGAACAAGCTGCTTTGCCACAATAAATATTTTCAAGTTT	intergenic							6.23416	23.5259	2.99098	4.04049	6.04973	7.65274	5	26.2338	18.9724	25.3714	3.29927	3.17774	2.49594	4.14531	3.82072	4.15543
ASHGA5P037086	0.0247273	0.0691242	2.02651	down	noncoding	uc010ghu.1	BC036778	UCSC_knowngene	2528	chr20	+	46130674	46133202		CTTACTAATGTCTTCTTGACTGGTCTTTTGAAATAAGCTTTCTTGCAGGGACATTACATT	exon sense-overlapping	NM_001174087	NCOA3	nuclear receptor coactivator 3 isoform c	+	46130600	46285621	5	16.5898	2.45604	3.47504	5	5	5	17.3199	20.9393	11.51	2.46913	2.40305	2.49594	3.479	3.97396	2.97215
ASHGA5P037086	0.0247273	0.0691242	2.02651	down	noncoding	uc010ghu.1	BC036778	UCSC_knowngene	2528	chr20	+	46130674	46133202		CTTACTAATGTCTTCTTGACTGGTCTTTTGAAATAAGCTTTCTTGCAGGGACATTACATT	exon sense-overlapping	NM_001174088	NCOA3	nuclear receptor coactivator 3 isoform d	+	46130600	46285621	5	16.5898	2.45604	3.47504	5	5	5	17.3199	20.9393	11.51	2.46913	2.40305	2.49594	3.479	3.97396	2.97215
ASHGA5P037086	0.0247273	0.0691242	2.02651	down	noncoding	uc010ghu.1	BC036778	UCSC_knowngene	2528	chr20	+	46130674	46133202		CTTACTAATGTCTTCTTGACTGGTCTTTTGAAATAAGCTTTCTTGCAGGGACATTACATT	exon sense-overlapping	NM_006534	NCOA3	nuclear receptor coactivator 3 isoform b	+	46130600	46285621	5	16.5898	2.45604	3.47504	5	5	5	17.3199	20.9393	11.51	2.46913	2.40305	2.49594	3.479	3.97396	2.97215
ASHGA5P037086	0.0247273	0.0691242	2.02651	down	noncoding	uc010ghu.1	BC036778	UCSC_knowngene	2528	chr20	+	46130674	46133202		CTTACTAATGTCTTCTTGACTGGTCTTTTGAAATAAGCTTTCTTGCAGGGACATTACATT	exon sense-overlapping	NM_181659	NCOA3	nuclear receptor coactivator 3 isoform a	+	46130600	46285621	5	16.5898	2.45604	3.47504	5	5	5	17.3199	20.9393	11.51	2.46913	2.40305	2.49594	3.479	3.97396	2.97215
ASHGA5P043361	0.00155725	0.0124315	4.07603	down	noncoding	NR_033999	LOC100129148	RefSeq	463	chr7	-	139102208	139112272		CTCTGGACCTGGATCTACCAGACAAGATTTGATTTTGTTTCTACCTTTGTAATTACTATA	natural antisense	NM_001244584	C7orf55-LUC7L2	C7orf55-LUC7L2 protein	+	139025877	139108203	5.96556	37.1661	2.72867	4.75583	5	7.89667	5	43.9703	33.2749	34.2532	2.46913	3.22093	2.49594	4.94492	4.69437	4.62819
ASHGA5P043361	0.00155725	0.0124315	4.07603	down	noncoding	NR_033999	LOC100129148	RefSeq	463	chr7	-	139102208	139112272		CTCTGGACCTGGATCTACCAGACAAGATTTGATTTTGTTTCTACCTTTGTAATTACTATA	natural antisense	NM_001244585	LUC7L2	putative RNA-binding protein Luc7-like 2 isoform 3	+	139025104	139108203	5.96556	37.1661	2.72867	4.75583	5	7.89667	5	43.9703	33.2749	34.2532	2.46913	3.22093	2.49594	4.94492	4.69437	4.62819
ASHGA5P043361	0.00155725	0.0124315	4.07603	down	noncoding	NR_033999	LOC100129148	RefSeq	463	chr7	-	139102208	139112272		CTCTGGACCTGGATCTACCAGACAAGATTTGATTTTGTTTCTACCTTTGTAATTACTATA	natural antisense	NM_001270643	LUC7L2	putative RNA-binding protein Luc7-like 2 isoform 4	+	139044591	139108203	5.96556	37.1661	2.72867	4.75583	5	7.89667	5	43.9703	33.2749	34.2532	2.46913	3.22093	2.49594	4.94492	4.69437	4.62819
ASHGA5P043361	0.00155725	0.0124315	4.07603	down	noncoding	NR_033999	LOC100129148	RefSeq	463	chr7	-	139102208	139112272		CTCTGGACCTGGATCTACCAGACAAGATTTGATTTTGTTTCTACCTTTGTAATTACTATA	natural antisense	NM_016019	LUC7L2	putative RNA-binding protein Luc7-like 2 isoform 1	+	139044591	139108203	5.96556	37.1661	2.72867	4.75583	5	7.89667	5	43.9703	33.2749	34.2532	2.46913	3.22093	2.49594	4.94492	4.69437	4.62819
ASHGA5P028938	0.0123107	0.0440571	2.48708	down	noncoding	uc001vrz.1	AX748212	UCSC_knowngene	2141	chr13	+	111936127	111938268		TGACACCTCTCATCACAGGACTAACAGGACCCAAATGACACGAGGGGTTTTATTAGAATT	intron sense-overlapping	NM_001113511	ARHGEF7	rho guanine nucleotide exchange factor 7 isoform c	+	111767623	111947542	808.181	2272.22	9.59266	10.9071	1049.61	855.758	519.179	2087.9	2550.35	2178.41	10.1414	9.35918	9.27737	10.7324	11.1542	10.8347
ASHGA5P028938	0.0123107	0.0440571	2.48708	down	noncoding	uc001vrz.1	AX748212	UCSC_knowngene	2141	chr13	+	111936127	111938268		TGACACCTCTCATCACAGGACTAACAGGACCCAAATGACACGAGGGGTTTTATTAGAATT	intron sense-overlapping	NM_001113512	ARHGEF7	rho guanine nucleotide exchange factor 7 isoform d	+	111767623	111947542	808.181	2272.22	9.59266	10.9071	1049.61	855.758	519.179	2087.9	2550.35	2178.41	10.1414	9.35918	9.27737	10.7324	11.1542	10.8347
ASHGA5P028938	0.0123107	0.0440571	2.48708	down	noncoding	uc001vrz.1	AX748212	UCSC_knowngene	2141	chr13	+	111936127	111938268		TGACACCTCTCATCACAGGACTAACAGGACCCAAATGACACGAGGGGTTTTATTAGAATT	intron sense-overlapping	NM_001113513	ARHGEF7	rho guanine nucleotide exchange factor 7 isoform a	+	111839172	111958081	808.181	2272.22	9.59266	10.9071	1049.61	855.758	519.179	2087.9	2550.35	2178.41	10.1414	9.35918	9.27737	10.7324	11.1542	10.8347
ASHGA5P028938	0.0123107	0.0440571	2.48708	down	noncoding	uc001vrz.1	AX748212	UCSC_knowngene	2141	chr13	+	111936127	111938268		TGACACCTCTCATCACAGGACTAACAGGACCCAAATGACACGAGGGGTTTTATTAGAATT	intron sense-overlapping	NM_003899	ARHGEF7	rho guanine nucleotide exchange factor 7 isoform a	+	111806060	111958081	808.181	2272.22	9.59266	10.9071	1049.61	855.758	519.179	2087.9	2550.35	2178.41	10.1414	9.35918	9.27737	10.7324	11.1542	10.8347
ASHGA5P028938	0.0123107	0.0440571	2.48708	down	noncoding	uc001vrz.1	AX748212	UCSC_knowngene	2141	chr13	+	111936127	111938268		TGACACCTCTCATCACAGGACTAACAGGACCCAAATGACACGAGGGGTTTTATTAGAATT	intron sense-overlapping	NM_145735	ARHGEF7	rho guanine nucleotide exchange factor 7 isoform b	+	111767623	111947542	808.181	2272.22	9.59266	10.9071	1049.61	855.758	519.179	2087.9	2550.35	2178.41	10.1414	9.35918	9.27737	10.7324	11.1542	10.8347
ASHGA5P000342	9.17435e-05	0.00318775	4.12946	down	noncoding	chr2:151418900-151431450+	chr2:151418900-151431450	LincRNAs identified by Khalil et al	12550	chr2	+	151710654	151723204		GAGGCAATAAAAGGGATTATGTCTGTTGATGTTTTCTGATGTTTTTGAAAGCAGTTTCTG	intergenic							5	31.3971	2.45604	4.50199	5	5	5	32.2028	34.1491	27.8396	2.46913	2.40305	2.49594	4.46758	4.73503	4.30338
ASHGA5P016988	0.00847334	0.0348748	4.00435	down	noncoding	ENST00000436328	AC004741.3	GENCODE	430	chr7	+	16308873	16310229		AGAGAGAAAGGTGGTCTATCATTTTGGAGTTTCTTTCCACCTCTGGAGAATTGCTCAGGA	intronic antisense	NM_001101417	ISPD	isoprenoid synthase domain-containing protein isoform b	-	16127151	16460947	6.96516	39.9942	2.87338	4.87495	5	10.8955	5	40.7501	44.1543	35.0781	2.46913	3.65506	2.49594	4.82712	5.13432	4.6634
ASHGA5P016988	0.00847334	0.0348748	4.00435	down	noncoding	ENST00000436328	AC004741.3	GENCODE	430	chr7	+	16308873	16310229		AGAGAGAAAGGTGGTCTATCATTTTGGAGTTTCTTTCCACCTCTGGAGAATTGCTCAGGA	intronic antisense	NM_001101426	ISPD	isoprenoid synthase domain-containing protein isoform a	-	16127151	16460947	6.96516	39.9942	2.87338	4.87495	5	10.8955	5	40.7501	44.1543	35.0781	2.46913	3.65506	2.49594	4.82712	5.13432	4.6634
ASHGA5P022317	3.17663e-05	0.00202448	2.49259	down	noncoding	ENST00000554441	DIO3OS	GENCODE	1068	chr14	-	102023640	102026712	ENST00000555882, ENST00000557661	CCGGGCCGAGGCCCAGCCCAATAGGAAGCACCTGATCCACACTCTTTCTAGCCCCAGGGA	bidirectional	NM_001362	DIO3	type III iodothyronine deiodinase	+	102027687	102029789	22.5129	96.598	4.90699	6.22464	18.854	28.5366	20.1482	103.891	89.7891	96.114	4.79836	4.91401	5.0086	6.25021	6.23419	6.18951
ASHGA5P038885	0.00878418	0.0356692	2.03955	down	noncoding	ENST00000466625	RP11-6B4.1	GENCODE	322	chr3	+	81143793	81144462		CTGAAAAGTCCAATGAACTACAGATTTCAACCATGGAGATTTGTGCCCTACTATGAAACG	intergenic							7.88133	31.5596	3.47804	4.50629	6.67194	11.6656	5.3065	27.0508	34.092	33.5361	3.42267	3.74553	3.26591	4.19133	4.73228	4.59525
ASHGA5P048030	0.00824128	0.0342392	2.87848	down	noncoding	ENST00000529910	RP11-514F3.4	GENCODE	535	chr11	-	36342707	36344990		TTAGACATGTTAGTTGATGCCCAACCTCTAGGGACACAATTTCTTTCTGCAGTGGATTCA	intronic antisense	NM_001160167	PRR5L	proline-rich protein 5-like isoform a	+	36317724	36486754	5.34138	31.4977	2.9688	4.49411	5.38113	5	5.64303	38.1615	28.4388	27.8929	3.15927	2.40305	3.34408	4.72851	4.44714	4.30668
ASHGA5P039587	0.00371853	0.0206814	2.97172	down	noncoding	ENST00000504050	RP11-125O18.1	GENCODE	645	chr4	-	128018252	128391707		ATCTTCCTCTGATAGTTCTACTTCATTCTGTCAAAGATCCAATTCCCGAAAGAGTTTTTT	intergenic							13.7809	69.8329	4.16008	5.73137	8.26058	21.8018	11.2803	71.4583	70.8002	67.2403	3.69833	4.55716	4.22473	5.68098	5.86393	5.64922
ASHGA5P043516	0.000840567	0.00889169	3.10693	down	noncoding	ENST00000422697	AC004535.2	GENCODE	449	chr7	+	10742302	10747033		TCACCTGCATGACATTTCTTCACTTGAGATGCTGTTTGCCCTTTAAATGGCATCTTAGCA	intergenic							20.3163	109.875	4.78124	6.41673	16.439	22.7037	21.8063	116.349	110.423	102.852	4.61617	4.61391	5.11364	6.41576	6.54369	6.29073
ASHGA5P034260	0.000322804	0.00550906	3.41338	down	noncoding	uc002pec.3	BC062328	UCSC_knowngene	1644	chr19	-	46692285	46706319		AAATTTATTACTCAGATTCTACCCTGTCAACCCAGGACGTGTTACTTACACATTTCCCAG	intergenic							12.7613	80.1767	4.17391	5.94511	13.336	13.2582	11.6897	83.3139	81.8275	75.3886	4.33024	3.9133	4.27819	5.92362	6.09296	5.81875
ASHGA5P018672	0.0057917	0.0273083	3.54359	down	noncoding	NR_024431	LOC283050	RefSeq	2450	chr10	-	80703082	80827205		TATTTACTGTCTACTATGTGAGTTTTGGGCATCCTTCTATCAGCCCTTATCCCAGGGCAG	intergenic							22.8976	138.979	4.91345	6.73866	16.596	29.9096	22.1873	118.772	185.224	112.94	4.62726	4.97712	5.13598	6.44653	7.34767	6.42179
ASHGA5P029893	0.00322467	0.0189685	2.38445	down	noncoding	TCONS_00008869	XLOC_003646	LincRNAs identified by Cabili et al	580	chr4	+	111288132	111291542		GAAAACCCTTGTAAATCCACCACTGTTAGGCTTAGCCATCATCTCCTTGATGAAGCCTAT	intergenic							13.6641	58.738	4.21026	5.46391	14.4263	17.8249	8.74097	53.454	60.6056	62.1543	4.43876	4.29701	3.895	5.24254	5.62025	5.52895
ASHGA5P044377	0.00018823	0.00431689	2.8173	down	noncoding	ENST00000524253	CTD-3118D11.2	GENCODE	364	chr8	-	87165662	87166435	ENST00000522679	CTTGCATCTAGAAGATAGGATTTGAAATTGTGTTGCTTTCTCAAGCTGATTACATCAAAG	natural antisense	NM_152565	ATP6V0D2	V-type proton ATPase subunit d 2	+	87111138	87166454	5	22.064	2.45604	3.95036	5	5	5	20.2615	22.5086	23.4219	2.46913	2.40305	2.49594	3.7336	4.08538	4.03208
ASHGA5P038150	0.0310625	0.0804081	2.45818	down	noncoding	TCONS_00024635	XLOC_011926	LincRNAs identified by Cabili et al	408	chr16	-	34259779	34263920		ACAATGGACAGGCCATCAGCATCAGACTGTGTTCCGAATAATCAGAGGACATTGTGTTTT	intergenic							5.78444	24.7526	2.81369	4.11128	7.35332	5	5	29.3667	18.7484	26.1425	3.54207	2.40305	2.49594	4.32664	3.80293	4.20426
ASHGA5P047329	0.00113069	0.010314	2.15023	down	noncoding	ENST00000426067	RP11-253D19.2	GENCODE	378	chr10	+	30865627	30869111		TTTCAAGACCAGCCTGCTTTCAAGGTGTCAACTGATCGTGTAGACAATGTCTCAAAAAAC	intergenic							47.0531	155.437	5.83846	6.94295	43.1262	65.5239	32.5091	172.09	152.216	142.006	5.8819	5.98585	5.64762	7.01914	7.04003	6.76969
ASHGA5P009884	0.0158987	0.0517271	2.64813	down	noncoding	ENST00000357876	RP5-857K21.3	GENCODE	498	chr1	+	529838	532878		CCCAGCTGAGTTTGGATCATAATCCTTCATTCTCAATTTTGTTTGTTATAAGTAGCTTGA	intergenic							5.41436	25.2567	2.74665	4.15162	6.24308	5	5	29.2058	26.673	19.8915	3.34096	2.40305	2.49594	4.31766	4.35	3.78721
ASHGA5P053772	0.0100741	0.0387682	2.02042	down	noncoding	uc004azv.1	DQ673933	UCSC_knowngene	476	chr9	-	102121913	102128798	uc010mst.1	ATGAATCTTCATCAAACAATAAAATCCTGCCTGGTACCAGACCTACCTGTGCCATCCAAG	intergenic							14.7286	51.5986	4.25166	5.26631	10.8779	23.5797	9.72805	49.1655	49.1377	56.4926	4.06018	4.66299	4.03181	5.11488	5.29697	5.38709
ASHGA5P036590	0.0168384	0.0535772	3.12088	down	noncoding	ENST00000451070	AC093642.3	GENCODE	599	chr2	+	242914188	242916680		TCATTATAATCCATTATTTAATACATTTTTCTTCCATTTGATCATATTACTTGCTGATAG	intergenic							8.39357	41.5359	3.29856	4.94051	7.18913	12.9916	5	44.2456	39.2762	41.086	3.51292	3.88681	2.49594	4.95621	4.95464	4.91069
ASHGA5P048467	0.0177497	0.0555039	2.32076	down	noncoding	TCONS_00013750	XLOC_006389	LincRNAs identified by Cabili et al	322	chr7	-	26656866	26657903		TTCTTGGAGTTGGACACCACCTGAACCTGAGTGAAATGATTGTGCACTTCTTAATGGCCT	intergenic							6.30869	22.81	2.78609	4.00069	5	8.92608	5	22.6625	20.5136	25.2539	2.46913	3.3932	2.49594	3.91253	3.94171	4.14782
ASHGA5P017508	0.0260344	0.0714893	3.98339	down	noncoding	ENST00000442500	LINC00454	GENCODE	778	chr13	-	114581672	114584465		GCACCATAGGCACTCATAATCCAGGTTCAGTTTCTGCCAGCACTAATTTGGTTTATTCCA	intergenic							10.944	64.3933	3.6125	5.6065	5	17.7909	10.0411	64.3584	64.2303	64.5911	2.46913	4.29388	4.07451	5.52353	5.71107	5.58489
ASHGA5P045331	0.0120511	0.0434767	2.49249	down	noncoding	uc004auk.3	BC036695	UCSC_knowngene	1316	chr9	-	96938884	96966848	NR_046165	GGTCCTCTATGAAGATTTCCTGAAGGCTACTTACTTTCTCTACTCATTAAAATTTTTGCT	intergenic							6.63068	34.6414	3.32065	4.63824	7.33386	5.78095	6.77721	40.2888	36.5659	27.0696	3.53796	2.85127	3.57272	4.81013	4.84576	4.25882
ASHGA5P046846	0.00889377	0.0359437	3.20926	down	noncoding	TCONS_00017420	XLOC_007971	LincRNAs identified by Cabili et al	362	chrX	+	46988763	46990742		ACCCTCTAAAGGTGTCCAAGCTGCTCCAAAGAACAATTGATTAACCCAACGGCTGTCTTT	intergenic							6.53999	31.4356	2.81707	4.49931	5	9.61998	5	30.4333	27.4317	36.442	2.46913	3.48615	2.49594	4.38221	4.3899	4.72583
ASHGA5P057222	0.000974227	0.00961725	2.59258	down	noncoding	TCONS_00014746	XLOC_006830	LincRNAs identified by Cabili et al	340	chr8	+	69901719	69942176		GACAGGAGCCTGAGGAGCACCAAACAACTTGCAACTTATGTTTCCCTTTTAATCACAAAG	intergenic							11.9668	58.4808	4.08084	5.45522	13.1547	12.683	10.0627	64.658	58.3514	52.4329	4.31119	3.85503	4.07629	5.53057	5.55577	5.27932
ASHGA5P021490	0.000168235	0.00410257	2.304	down	noncoding	ENST00000533304	RP3-468B3.3	GENCODE	592	chr6	-	33860086	33864691		GCAGAAGAAGACCCCAAGGCATCTCCCCAAGATGACCACAGTTGTCCCTGAAGAAGCAGT	intergenic							954.226	2471.53	9.84228	11.0464	804.796	1308.18	749.701	2464.73	2272.7	2677.16	9.75549	9.98904	9.78233	10.9931	11.0025	11.1437
ASHGA5P058827	0.00430559	0.0227819	2.47639	down	noncoding	uc.146+	uc.146	UCR	214	chr4	+	111916475	111916689		CCTTTCATCTATAATAGAGATGTCGAATTTCCTCCAAACTGGATTTGCATGTTTTAACTG	intergenic							5	19.9569	2.45604	3.76428	5	5	5	16.5659	17.5803	25.7244	2.46913	2.40305	2.49594	3.41572	3.69872	4.17839
ASHGA5P022083	0.0106605	0.0401891	4.42659	down	noncoding	ENST00000548702	RP11-114H23.2	GENCODE	742	chr12	-	76087789	76092596		CCCTCTTAAGATATATTCTCTCTGTCAACCTAGACCATAGTTGTTCAACATAATACTTAC	intergenic							7.70318	46.2302	2.95482	5.10101	5	13.1095	5	51.7949	41.7342	45.1615	2.46913	3.89938	2.49594	5.1984	5.05107	5.05357
ASHGA5P029426	0.00230824	0.015735	4.64077	down	noncoding	ENST00000555435	RP11-203M5.7	GENCODE	478	chr14	+	20919463	20920077		AGGTTCAGATAAGTCCATCTTTGTTCCTGACATTCCCATGACTCAGATAGAACAAAGAAA	intronic antisense	NM_017807	OSGEP	probable tRNA threonylcarbamoyladenosine biosynthesis protein OSGEP	-	20915206	20923267	6.8477	53.5131	3.10259	5.31696	7.37524	8.16786	5	56.4494	46.0242	58.0658	3.54525	3.26658	2.49594	5.32407	5.19881	5.428
ASHGA5P022086	0.0195114	0.0589351	2.19807	down	noncoding	ENST00000548782	RP11-175P13.3	pseudogene	407	chr12	-	100574330	100593540		GGTGCTTGAGAAATTTGATGTCTTCTTTCCATCCTGGGAATGGACATAATGATAGTCGGA								11.1212	44.4537	3.90932	5.04556	14.3575	13.0925	5.91374	45.0073	44.0573	44.2966	4.43137	3.89628	3.40031	4.98242	5.13025	5.024
ASHGA5P017233	0.00712643	0.0311538	2.46053	down	noncoding	ENST00000439146	RP11-157N3.1	GENCODE	474	chr1	+	101789392	101842869		ATGCTATCAGGGCTTATGCTTGGCCTACTGATCCCAGAGGAGAGAATCATAGAGAATTGT	intergenic							5.98785	23.1683	2.73239	4.03135	5	7.96357	5	23.5421	23.3676	22.5952	2.46913	3.23209	2.49594	3.97266	4.1433	3.97809
ASHGA5P057274	0.0133175	0.0462539	2.06371	down	noncoding	TCONS_00015165	XLOC_007211	LincRNAs identified by Cabili et al	249	chr8	-	127643996	127651364		CAATTTACAGGAAGAGACTCATTCTGGTGTAGTCATGCCCCATTGAACAGAGCCAAACCT	intergenic							9.70953	38.4922	3.7757	4.82094	6.61737	11.7798	10.7314	39.0027	41.7814	34.6926	3.41132	3.75885	4.15695	4.76383	5.05223	4.64676
ASHGA5P028896	0.00286314	0.0176669	2.32705	down	noncoding	ENST00000422074	RP11-471M2.2	GENCODE	344	chr13	+	88453290	88456063		ATTCACCTTTCAAAGGCACAGACACTCCTCTTATTTTGTACACATTGCAACACTTTGAAC	intergenic							14.4697	60.7635	4.29987	5.51837	10.2011	18.5689	14.6392	62.6251	61.8968	57.7685	3.97694	4.35164	4.57102	5.48058	5.6538	5.42073
ASHGA5P020755	9.6798e-06	0.00132897	2.37063	down	noncoding	ENST00000519427	RP11-313C15.1	GENCODE	1722	chr8	+	73644279	73664078		GTGACCCACTCATTCTCTTATGTGGACATCACAATTTACCTGTTCTCCCAGCAGTGGATA	intron sense-overlapping	NM_004770	KCNB2	potassium voltage-gated channel subfamily B member 2	+	73449625	73850584	108.37	355.777	6.95581	8.20108	97.4643	135.724	91.9216	386.444	326.516	354.372	6.96034	6.9029	7.00418	8.25625	8.20622	8.14076
ASHGA5P021845	0.000129656	0.00366969	3.60215	down	noncoding	ENST00000542248	RP11-173C20.2	GENCODE	548	chr12	-	127232601	127256902		TCATCCACAGTTAATCCCGTCATGTATTGACCCGGAAACATCATCTCATTTGCCTATAAG	intergenic							5	27.6908	2.45604	4.3049	5	5	5	27.5251	30.3248	25.2223	2.46913	2.40305	2.49594	4.21974	4.54921	4.14575
ASHGA5P043052	0.00414384	0.0221651	2.39946	down	noncoding	ENST00000413357	SEPT7P2	GENCODE	487	chr7	-	45765643	45768589	uc022ack.1	AGAGCCCTTCTAAGTTGTAAGATCTGAAAGAAATGTCTGCCATCTATATTCTCAGCCACA	intergenic							17.4652	70.8206	4.49065	5.75336	15.6633	26.4183	10.314	71.9761	70.8505	69.6351	4.54811	4.8164	4.10744	5.68959	5.86589	5.7046
ASHGA5P040502	0.00276685	0.0173347	2.81802	down	noncoding	ENST00000506717	CTC-575I10.1	GENCODE	556	chr5	-	73073863	73082316		TTTCTATCCCCCAAATGCTGAGAGAACTCTAGACGAGCAGTCCAGACGCTAAATAGATCA	intronic antisense	NM_001080479	ARHGEF28	rho-guanine nucleotide exchange factor isoform 1	+	72921982	73237818	27.4482	131.68	5.18847	6.68315	28.7002	28.2881	25.3563	140.764	146.144	108.132	5.35042	4.90396	5.31103	6.71762	6.97081	6.36101
ASHGA5P040502	0.00276685	0.0173347	2.81802	down	noncoding	ENST00000506717	CTC-575I10.1	GENCODE	556	chr5	-	73073863	73082316		TTTCTATCCCCCAAATGCTGAGAGAACTCTAGACGAGCAGTCCAGACGCTAAATAGATCA	intronic antisense	NM_001177693	ARHGEF28	rho-guanine nucleotide exchange factor isoform 2	+	72921982	73237818	27.4482	131.68	5.18847	6.68315	28.7002	28.2881	25.3563	140.764	146.144	108.132	5.35042	4.90396	5.31103	6.71762	6.97081	6.36101
ASHGA5P039816	0.0344623	0.0864807	3.38789	down	noncoding	ENST00000435800	RP11-31F15.1	GENCODE	1747	chr1	+	113499050	113544813		GGTATCTATTGTTGCCAACTTTACTTTCCCATCACATTAGCCTTGTATTAGATGAAGTAA	natural antisense	ENST00000429288	SLC16A1	solute carrier family 16, member 1 (monocarboxylic acid transporter 1) [Source:HGNC Symbol;Acc:10922]	-	113460381	113499635	29.8879	135.245	4.94741	6.7078	17.2736	60.7723	11.6177	146.388	162.773	96.574	4.68534	5.88664	4.27026	6.77569	7.15123	6.19648
ASHGA5P057349	0.00379545	0.0209553	2.07693	down	noncoding	TCONS_00016264	XLOC_007638	LincRNAs identified by Cabili et al	282	chr9	-	6408524	6411865		AACAAGACAACTTGGACTTCACATTTGCCAAAATCGGGCCACTCTCTACCTGTTTGCAGT	intergenic							21.2187	74.3832	4.77273	5.82719	14.6968	31.4363	17.5231	73.9105	71.7994	77.4396	4.46353	5.0402	4.81447	5.73129	5.88837	5.86191
ASHGA5P037915	0.0012684	0.0111467	5.66516	down	noncoding	TCONS_00016469	XLOC_007835	LincRNAs identified by Cabili et al	831	chr9	-	118369850	118505348		TTGAAGTAATAAAGAAGCATTTGTTTCCTAGGTTTGTTTTGTTATTGTTTTATCCTAGCC	intergenic							5.24447	50.82	2.74464	5.24676	5	5	5.73342	53.0059	47.724	51.7302	2.46913	2.40305	3.36174	5.22929	5.25365	5.25734
ASHGA5P055429	0.002431	0.0162017	2.037	down	noncoding	TCONS_00028445	XLOC_013805	LincRNAs identified by Cabili et al	246	chr20	-	54206129	54242676		AGTAATTGCCCGGTTTAATGGAAGATGGTTAAGCCTGTGTTGGACATCTGCTGTCTTTGC	intergenic							7.85166	32.477	3.52351	4.54995	6.40264	9.44683	7.70553	36.7036	32.1644	28.5632	3.37169	3.46432	3.73451	4.66614	4.64189	4.34182
ASHGA5P027581	0.0368692	0.0907045	2.07842	down	noncoding	ENST00000548329	RP1-46F2.3	GENCODE	565	chr12	-	111389514	111395615	ENST00000546852	TTTACTGTGGGACTGGCATCATTTCAAGCATTTAATCCTCGTCCCAACTCTACGAGGAAG	intergenic							11.2587	42.6528	3.91816	4.97365	6.01441	15.5301	12.2316	38.2244	41.8414	47.8924	3.29255	4.11906	4.34286	4.731	5.05383	5.13612
ASHGA5P044497	0.00541535	0.0261968	3.44274	down	noncoding	ENST00000523563	KB-1471A8.2	GENCODE	419	chr8	-	120884717	120886723		CCCTTACAAAATAAAAATAATTGCGGCTACCACTTTTGACATCTGCTGCATTAAAGATAC	intronic antisense	NM_022783	DEPTOR	DEP domain-containing mTOR-interacting protein	+	120885899	121063157	5.87017	36.7865	2.96798	4.75154	5	6.25222	6.35828	32.8288	39.6644	37.8664	2.46913	2.94195	3.49286	4.50041	4.96939	4.78482
ASHGA5P047711	0.000220064	0.00461625	3.01353	down	noncoding	AY927495R		LincRNAs identified by Khalil et al	644	chr20	+	1054973	1055617		TTGGCTTTGCTGTCGCCATTGTCTCCATATTCCACTTCGAAGAGATGGTTCTGGAATGAA	intergenic							36.9993	179.35	5.57096	7.16241	33.9568	44.5648	32.4764	194.33	184.111	159.609	5.57089	5.49616	5.64582	7.2103	7.33756	6.93936
ASHGA5P031671	0.000565371	0.00730125	2.15953	down	noncoding	ENST00000575562	RP11-2C24.6	GENCODE	1704	chr16	+	30789769	30791473		ATGTTTCATTCAAGAGTTTTCTGTCTTCCACCATCTCATAGGGCAACAGTCTCTCCCCAG	natural antisense	NM_001080417	ZNF629	zinc finger protein 629	-	30789769	30798523	92.9681	281.422	6.7386	7.84932	72.1765	124.501	82.2263	283.933	282.522	277.81	6.56673	6.79122	6.85786	7.78224	7.98525	7.78048
ASHGA5P048628	0.00600356	0.0279646	4.17761	down	noncoding	TCONS_00017254	XLOC_008081	LincRNAs identified by Cabili et al	1586	chrX	+	145997664	146036027		TATCCTGTCATTCTCTAGAGAGCTTGTTCCTGAAGCATGGTGCTAAGTCCATATGCAGCA	intergenic							5.43919	39.2749	2.78563	4.8483	5	5	6.31759	35.1614	45.1329	37.5304	2.46913	2.40305	3.4847	4.60635	5.16771	4.77084
ASHGA5P020052	0.00118344	0.0106213	2.03734	down	noncoding	ENST00000507391	CTB-1H10.1	GENCODE	312	chr5	+	145780543	145786922		TAAAATGACGAAATCAAGAAAGCACAGGACTCTGGCTCAGAACTGTTGGCAGGCACAACT	intergenic							5	16.2965	2.45604	3.48273	5	5	5	14.7601	17.093	17.0363	2.46913	2.40305	2.49594	3.24791	3.65441	3.54586
ASHGA5P057654	0.00346412	0.0198033	2.36165	down	noncoding	TCONS_00020438	XLOC_009767	LincRNAs identified by Cabili et al	573	chr12	+	54582953	54584598		CCAAAGGCAGGACTTGTCTGATCTCCTATCAACAAAAACTTAATGGGTGCAGTAGGAGCT	intergenic							5.59259	21.4171	2.66541	3.90521	5	6.77776	5	20.4231	20.6911	23.1372	2.46913	3.03115	2.49594	3.74642	3.95349	4.01571
ASHGA5P040307	0.0178529	0.0556937	2.26503	down	noncoding	ENST00000506059	CTD-2161F6.2	GENCODE	456	chr5	-	4775588	4805882		GTCCCAGTCATTTTAGACCTCTTCACCTTACAATGTATTGTGTGAGATTATATTTCCATG	intergenic							10.1557	44.2513	3.85486	5.03439	8.6837	8.88068	12.9028	49.4969	40.3378	42.9193	3.76437	3.38561	4.4146	5.127	4.99722	4.97895
ASHGA5P053077	0.0123579	0.0441618	2.00813	down	noncoding	uc022ack.1	BC015774	UCSC_knowngene	3432	chr7	-	45763395	45766827		TAATCTTCCTCAAAGGGTTATGGACTCTCAGAGCCAGAAGAAGGTCATCTCTCCTTTGCT	intergenic							27.723	88.8101	5.09089	6.09674	17.3241	44.4298	21.4152	93.1555	80.4782	92.7966	4.6899	5.4917	5.09106	6.09225	6.06414	6.13382
ASHGA5P035683	0.00206269	0.0147023	2.33817	down	noncoding	ENST00000425850	AC116609.2	GENCODE	535	chr2	+	742487	747767		TAGGGCCGATATCCCCTTTTGAAATTACATCGTTAGGATTTCTGCCATCTTTGGAACCAG	intergenic							7.35363	34.9028	3.44904	4.67443	7.20241	7.44549	7.41298	34.4437	35.4605	34.8043	3.51568	3.14568	3.68577	4.57456	4.7969	4.65182
ASHGA5P041441	0.00330146	0.0192372	2.11931	down	noncoding	uc003llr.1	BC127870	UCSC_knowngene	706	chr5	+	141254323	141255029		TAGACCATTTTATTTCCAGCATCGGGCACACAGTGGGTGCTCCTTGGTTCGATGAATAAA	intronic antisense	NM_002587	PCDH1	protocadherin-1 isoform 1 precursor	-	141242216	141257944	5.52592	19.2185	2.65436	3.73796	5	6.57775	5	20.5613	17.6493	19.4449	2.46913	2.998	2.49594	3.75689	3.70452	3.75245
ASHGA5P041441	0.00330146	0.0192372	2.11931	down	noncoding	uc003llr.1	BC127870	UCSC_knowngene	706	chr5	+	141254323	141255029		TAGACCATTTTATTTCCAGCATCGGGCACACAGTGGGTGCTCCTTGGTTCGATGAATAAA	intronic antisense	NM_032420	PCDH1	protocadherin-1 isoform 2 precursor	-	141232672	141257944	5.52592	19.2185	2.65436	3.73796	5	6.57775	5	20.5613	17.6493	19.4449	2.46913	2.998	2.49594	3.75689	3.70452	3.75245
ASHGA5P035946	0.00246314	0.0163111	2.259	down	noncoding	TCONS_00026982	XLOC_013031	LincRNAs identified by Cabili et al	725	chr19	+	29938474	29939292		ATGGTCGTTACCAAAACCCCAGTCATCTTCTTGAAGGAGCCTTAGTATAGGAAACCAGAG	intergenic							5	18.2567	2.45604	3.63173	5	5	5	23.0932	14.047	17.6301	2.46913	2.40305	2.49594	3.94157	3.35117	3.60244
ASHGA5P027215	0.00323636	0.0190117	2.86144	down	noncoding	N76827		LincRNAs identified by Khalil et al	377	chr8	+	67311599	67311969		TGCTGCATTCTCAACACAAAGTGCTATCCACTCTGCAGTTCTGTCATTTGCAACTAGTTC	intergenic							7.32589	42.0596	3.44417	4.96091	7.69028	6.54098	7.74639	43.8779	42.4772	39.8236	3.60148	2.9873	3.74373	4.94181	5.07895	4.86198
ASHGA5P028129	0.0113358	0.0419323	2.3998	down	noncoding	TCONS_00010076	XLOC_004530	LincRNAs identified by Cabili et al	245	chr5	+	121165111	121176422		ACAACAGAGGATTCACTATCTCATGGCTTCCTGTTAGTTTCAACCTAAGAGATCCAAGGT	intergenic							15.587	62.6216	4.29877	5.56168	11.1848	26.0942	9.48185	59.4099	68.7747	59.6802	4.0977	4.80314	3.99547	5.40177	5.81531	5.46797
ASHGA5P020187	0.0294823	0.0776858	2.39865	down	noncoding	ENST00000509228	CTD-2350J17.1	GENCODE	362	chr5	-	15606868	15607358		CATACCAAAGTTCAATGTCTGTCCCTACAGCATAATATAACATCGGTTATCTCAAACAAT	intronic antisense	NM_012304	FBXL7	F-box/LRR-repeat protein 7	+	15500304	15939900	5.37176	23.3611	2.77109	4.03331	5	5	6.1153	23.8963	26.8731	19.3138	2.46913	2.40305	3.44108	3.99944	4.36007	3.74042
ASHGA5P035019	0.00796146	0.0334885	2.02312	down	noncoding	uc002rvb.3	BC048424	UCSC_knowngene	1515	chr2	-	46795395	46807374		GTCAGGGATGATGAGCTTCCTGTGTCTTTACCCTAAAAGCTTGCTATATAAAGGATACTT	intronic antisense	NM_012249	RHOQ	rho-related GTP-binding protein RhoQ precursor	+	46769866	46811827	25.4839	89.4002	5.0923	6.10888	23.3716	25.0611	28.0191	95.3989	86.415	86.3866	5.07983	4.74868	5.44839	6.12955	6.17295	6.02415
ASHGA5P031970	0.0319594	0.0819435	2.55388	down	noncoding	ENST00000574293	CTC-786C10.1	GENCODE	777	chr16	+	85204881	85218969		CCAGCTGCACACAGGTTTTCTCTACTCCAACAGTCGCTTTGGGGCCATGGGTCTGAGAGA	intergenic							15.9995	69.564	4.36922	5.72191	8.18994	17.7404	22.0682	75.9342	63.9875	68.7704	3.68793	4.29082	5.12892	5.77535	5.70597	5.68441
ASHGA5P048719	6.13148e-05	0.0027444	4.99753	down	noncoding	TCONS_00023559	XLOC_011384	LincRNAs identified by Cabili et al	1530	chr15	+	100889914	100892899	TCONS_00023557	TTGTATTTCACTACTTTCCTGTTGAGCTTGGATTCCAGCCTCAAATTCCGCGATTTGGCC	intergenic							5	37.5598	2.45604	4.77726	5	5	5	40.8568	39.6418	32.1808	2.46913	2.40305	2.49594	4.83155	4.96858	4.53163
ASHGA5P038228	0.00129064	0.0112371	2.01774	down	noncoding	TCONS_00024699	XLOC_011978	LincRNAs identified by Cabili et al	332	chr16	-	65901326	65905189		AGAAAGATAGATCTGTGCATGGTCATCTTAACCCTCCTGTATCCTTAAAGCCCAGCACCA	intergenic							61.0683	185.449	6.20109	7.21383	47.2361	77.0903	58.8785	183.799	173.706	198.843	6.00439	6.19095	6.40794	7.12063	7.2489	7.27197
ASHGA5P032288	0.000125215	0.0035895	2.91963	down	noncoding	BX501243		LincRNAs identified by Khalil et al	591	chr10	+	115148152	115149054		GGTCATTAGTGATGTAGCTTTGTGTCCATGGCAGTCTTTATGATGACTGCTTTCTTTTTT	intergenic							5	22.7675	2.45604	4.00183	5	5	5	24.7963	23.3774	20.1289	2.46913	2.40305	2.49594	4.0562	4.1442	3.80508
ASHGA5P019863	0.00464788	0.0238425	3.69019	down	noncoding	ENST00000504280	RP11-141O11.2	GENCODE	810	chr5	-	68322581	68325992		ATTTCCTTCTGGTTCTCAAGATGTCTTACATGAAAAAAGCTCTGTGGCACATTACATTTG	intergenic							5.85813	38.3014	2.93022	4.81391	7.3738	5.2006	5	35.7259	37.4103	41.7681	3.54469	2.75002	2.49594	4.62694	4.8793	4.9355
ASHGA5P041118	5.63218e-06	0.0011092	3.44986	down	noncoding	TCONS_00022047	XLOC_010648	LincRNAs identified by Cabili et al	306	chr13	-	68155304	68157361		GGGCAAGGAATCAATCTCATTTGCAGCCATCATCATGAATCTGCTATACACTCAGCACAG	intergenic							5	26.5214	2.45604	4.24258	5	5	5	27.1975	26.4754	25.8913	2.46913	2.40305	2.49594	4.20017	4.3391	4.18847
ASHGA5P000101	0.0435191	0.102019	2.58462	down	noncoding	BC043260		RNAdb	2673	chr7	-	12723720	12726370		CTTGCAGAATCGTCCTCACTGAATTGCACTTTAATGTTATACCCTAGGTTTTAAAACTAC	intergenic							7.67606	27.8907	2.95178	4.32173	5	13.0282	5	29.0927	25.3756	29.2039	2.46913	3.89027	2.49594	4.3111	4.27819	4.37592
ASHGA5P045851	3.13132e-06	0.000948742	3.87122	down	noncoding	NR_038982	LOC100507346	RefSeq	1957	chr9	+	98225890	98232301		GTTTGTTTTCTTCCAACATGACATACTTCACGTTACTGAAACTCCTGTGTAGGTCGTAAA	natural antisense	NM_000264	PTCH1	protein patched homolog 1 isoform L	-	98205263	98270831	5	29.5656	2.45604	4.40883	5	5	5	32.3936	28.0195	28.2838	2.46913	2.40305	2.49594	4.47839	4.42274	4.32536
ASHGA5P045851	3.13132e-06	0.000948742	3.87122	down	noncoding	NR_038982	LOC100507346	RefSeq	1957	chr9	+	98225890	98232301		GTTTGTTTTCTTCCAACATGACATACTTCACGTTACTGAAACTCCTGTGTAGGTCGTAAA	natural antisense	NM_001083602	PTCH1	protein patched homolog 1 isoform M	-	98205263	98279247	5	29.5656	2.45604	4.40883	5	5	5	32.3936	28.0195	28.2838	2.46913	2.40305	2.49594	4.47839	4.42274	4.32536
ASHGA5P045851	3.13132e-06	0.000948742	3.87122	down	noncoding	NR_038982	LOC100507346	RefSeq	1957	chr9	+	98225890	98232301		GTTTGTTTTCTTCCAACATGACATACTTCACGTTACTGAAACTCCTGTGTAGGTCGTAAA	natural antisense	NM_001083603	PTCH1	protein patched homolog 1 isoform L'	-	98205263	98279247	5	29.5656	2.45604	4.40883	5	5	5	32.3936	28.0195	28.2838	2.46913	2.40305	2.49594	4.47839	4.42274	4.32536
ASHGA5P045851	3.13132e-06	0.000948742	3.87122	down	noncoding	NR_038982	LOC100507346	RefSeq	1957	chr9	+	98225890	98232301		GTTTGTTTTCTTCCAACATGACATACTTCACGTTACTGAAACTCCTGTGTAGGTCGTAAA	natural antisense	NM_001083604	PTCH1	protein patched homolog 1 isoform S	-	98205263	98270322	5	29.5656	2.45604	4.40883	5	5	5	32.3936	28.0195	28.2838	2.46913	2.40305	2.49594	4.47839	4.42274	4.32536
ASHGA5P045851	3.13132e-06	0.000948742	3.87122	down	noncoding	NR_038982	LOC100507346	RefSeq	1957	chr9	+	98225890	98232301		GTTTGTTTTCTTCCAACATGACATACTTCACGTTACTGAAACTCCTGTGTAGGTCGTAAA	natural antisense	NM_001083605	PTCH1	protein patched homolog 1 isoform S	-	98205263	98270322	5	29.5656	2.45604	4.40883	5	5	5	32.3936	28.0195	28.2838	2.46913	2.40305	2.49594	4.47839	4.42274	4.32536
ASHGA5P045851	3.13132e-06	0.000948742	3.87122	down	noncoding	NR_038982	LOC100507346	RefSeq	1957	chr9	+	98225890	98232301		GTTTGTTTTCTTCCAACATGACATACTTCACGTTACTGAAACTCCTGTGTAGGTCGTAAA	natural antisense	NM_001083606	PTCH1	protein patched homolog 1 isoform S	-	98205263	98269699	5	29.5656	2.45604	4.40883	5	5	5	32.3936	28.0195	28.2838	2.46913	2.40305	2.49594	4.47839	4.42274	4.32536
ASHGA5P045851	3.13132e-06	0.000948742	3.87122	down	noncoding	NR_038982	LOC100507346	RefSeq	1957	chr9	+	98225890	98232301		GTTTGTTTTCTTCCAACATGACATACTTCACGTTACTGAAACTCCTGTGTAGGTCGTAAA	natural antisense	NM_001083607	PTCH1	protein patched homolog 1 isoform S	-	98205263	98269481	5	29.5656	2.45604	4.40883	5	5	5	32.3936	28.0195	28.2838	2.46913	2.40305	2.49594	4.47839	4.42274	4.32536
ASHGA5P047031	0.000413489	0.00624903	3.33547	down	noncoding	uc021pwt.1	KCNQ1DN	UCSC_knowngene	61	chr10	-	99836117	99836178		TTTTAAAGAATGTTTTTCCATTCCCTTTTATGTGTTTTGCAGGTTACATCTCATTTCTTT	intergenic							13.8167	81.5093	4.23117	5.96905	14.0971	17.9796	9.37326	82.5283	85.4053	76.5944	4.40662	4.30879	3.97809	5.9072	6.15508	5.84488
ASHGA5P029675	0.00242813	0.0161936	2.09455	down	noncoding	ENST00000434575	RP11-216N14.9	GENCODE	316	chr1	-	153723458	153724652		AAACTATGATTTCTTCTGGAACCAAAGGATTGGCTCCTAGCTGTTCAGGGGAAGAGAGCT	natural antisense	NM_023015	INTS3	integrator complex subunit 3	+	153700566	153746555	8.12275	33.698	3.55259	4.61923	9.1996	9.4588	5.70984	33.4238	34.0652	33.605	3.83526	3.46585	3.35666	4.52793	4.73131	4.59845
ASHGA5P029312	0.000300691	0.00529648	2.1056	down	noncoding	TCONS_00010226	XLOC_004691	LincRNAs identified by Cabili et al	382	chr5	-	26321	37720		ATTTGTAGGGAAGACAATGTGCACCCATCGGAGCTCTGATTCCTTTACTTTCACTACCCT	intergenic							5	16.8023	2.45604	3.53028	5	5	5	15.9073	16.4885	18.0111	2.46913	2.40305	2.49594	3.35718	3.59836	3.63529
ASHGA5P042665	0.0388647	0.0942496	2.00741	down	noncoding	ENST00000565399	RP11-63E9.1	GENCODE	3996	chr6	+	141768147	141772143		CACATCCTCCAACAGTGTCATGGTACAAACATAAAATATAATAGAGAACAATGACCAACT	intergenic							6.79445	23.847	3.06285	4.06818	5.31757	10.0658	5	27.9513	23.2604	20.3292	3.14274	3.54985	2.49594	4.24504	4.13728	3.82222
ASHGA5P015444	0.000323585	0.00551748	3.21202	down	noncoding	ENST00000420255	AP000472.2	GENCODE	897	chr21	-	23381476	23470778		TGTTATACAGTTCTGCTTCCTTCACTTGCAGAGAGTTGTTGTTATGATGAGTCTCCAATG	intergenic							19.9309	110.628	4.74131	6.42479	15.9127	25.4281	18.4519	117.275	116.062	98.5459	4.57102	4.76831	4.8846	6.42736	6.62066	6.22635
ASHGA5P040050	0.00255639	0.0166557	3.09454	down	noncoding	uc003hxh.1	AK094561	UCSC_knowngene	869	chr4	+	105412121	105597345	ENST00000500179	GGAAGGTGTTATGTGGCCTCTGTATAACAGAGAATGTTCTATACTGAAAACTTATGATAT	natural antisense	NM_025212	CXXC4	CXXC-type zinc finger protein 4	-	105389462	105416058	5.78271	28.1653	2.69708	4.3268	5	7.34813	5	33.6994	25.3364	25.4602	2.46913	3.12617	2.49594	4.54283	4.27612	4.16146
ASHGA5P023726	0.000708991	0.00811323	5.91861	down	noncoding	HMlincRNA1607+	HMlincRNA1607	LincRNAs identified by Khalil et al	4938	chrX	+	44348754	44353692		CTTTGCTTTCCTTCTATTTTTGTTCTCAGGTATGTGTATGACATGGAAAGTGGAGATGAG	intergenic							6.06951	53.1642	2.74641	5.31167	5	8.20854	5	57.4468	52.7202	49.3255	2.46913	3.27416	2.49594	5.34948	5.40458	5.18094
ASHGA5P020631	0.00312983	0.0186051	4.29772	down	noncoding	ENST00000517733	CTB-43E15.3	GENCODE	555	chr5	-	173134616	173173212		ATTTTCTGGGTCTTGATCTTGTGACTCCAAATGGATGGTCTCCAGGACACATGTGCATGA	intergenic							6.48999	40.8006	2.81091	4.91448	5	9.46998	5	41.9827	40.1583	40.2607	2.46913	3.46766	2.49594	4.8723	4.9905	4.88064
ASHGA5P032016	0.017936	0.0558863	2.30155	down	noncoding	TCONS_00029622	XLOC_014278	LincRNAs identified by Cabili et al	493	chr22	+	48735893	48736582		AATCATTTTTCCACTTGGTGAAATACATTTTTGCCCCGTGAAAGCACGAGGAGGGCCTGT	intergenic							5.0482	21.554	2.70043	3.90304	5	5	5.14461	26.048	21.1016	17.5123	2.46913	2.40305	3.22911	4.1319	3.98642	3.59079
ASHGA5P045171	2.25683e-06	0.000888919	2.68413	down	noncoding	ENST00000417805	RP4-781K5.4	GENCODE	1373	chr1	+	234782034	234796670		GGAGGAGTTCTTTAATATAGACAGAGCTTGTTTCAGAATTGGTATCTTCCTGAATATTTG	intergenic							5	21.0541	2.45604	3.8805	5	5	5	22.4267	19.2053	21.5304	2.46913	2.40305	2.49594	3.89628	3.83699	3.90823
ASHGA5P056327	0.00347009	0.0198317	2.34231	down	noncoding	TCONS_00002568	XLOC_001173	LincRNAs identified by Cabili et al	389	chr1	-	207058696	207064884		GTAGATCCAGCCTTTGCCCACCGCTAAATAATCAGATCCAGGGAAGCATCAAAAGTCAAA	intergenic							77.8627	269.539	6.54517	7.7731	72.2171	85.268	76.1031	298.737	281.682	228.199	6.56761	6.31459	6.75332	7.8631	7.98035	7.47586
ASHGA5P032697	2.84767e-05	0.00194038	4.2625	down	noncoding	ENST00000434398	RP11-421L10.1	GENCODE	645	chr1	-	221505980	221509262	NR_024236	TCTTTTCTTTGTGGATACTGCAGGTCTACGTGAAATAGTGTGTTTTTGCGGGGTGCTGTC	intergenic							5	32.2235	2.45604	4.54774	5	5	5	30.0885	32.8702	33.7118	2.46913	2.40305	2.49594	4.36445	4.67575	4.60302
ASHGA5P040072	0.00169854	0.0130341	2.14607	down	noncoding	ENST00000503557	RP11-26P13.2	GENCODE	441	chr4	+	114864411	114865476		TCCTGGGATTGACCTCTCCTTTCTTTTAAAAAATATTCAGTGAACACTACTTTGTGCCAG	intronic antisense	NM_024590	ARSJ	arylsulfatase J precursor	-	114821439	114900878	35.1168	120.194	5.44115	6.54284	31.3647	50.244	23.7417	139.914	106.186	114.481	5.46307	5.63902	5.22135	6.7083	6.47971	6.44052
ASHGA5P043164	0.00219641	0.0152201	3.5007	down	noncoding	ENST00000476561	AC073635.5	GENCODE	570	chr7	-	76875656	76887440		TTCTATTTACGTTCTATAATAGATTGTAAAAAGTGGCCACGAATTCCTCCTATCTGCAGG	intronic antisense	NM_020879	CCDC146	coiled-coil domain-containing protein 146	+	76751933	76924521	6.02347	36.9539	2.94981	4.75745	5.55729	7.51313	5	36.7334	40.4013	33.7269	3.19753	3.15594	2.49594	4.66777	5.00055	4.60403
ASHGA5P032799	9.49911e-05	0.00324692	2.21874	down	noncoding	TCONS_00029004	XLOC_013921	LincRNAs identified by Cabili et al	451	chr21	+	35348656	35349283		TGAACTCTTCGGAGTCTCCTGTTCCACTTGGTAAATTTCCTATAGCCACGCACTGAAAGT	intergenic							23.8144	90.0575	4.96361	6.11335	21.6459	31.445	18.3524	101.755	81.6107	86.8068	4.97532	5.04096	4.87456	6.21789	6.08886	6.03332
ASHGA5P028399	0.000594718	0.00746963	2.19365	down	noncoding	TCONS_00010548	XLOC_005076	LincRNAs identified by Cabili et al	421	chr5	-	169005468	169010607		AGGCGCAGACGTGGCTCCACATAAATTTTTCCTTGGGCTGGTTTCCTGCATGTCTTTTAA	intergenic							36.6844	132.365	5.5685	6.70183	33.782	40.7832	35.4878	143.068	123.657	130.372	5.56342	5.37963	5.76245	6.74587	6.71937	6.64026
ASHGA5P028928	0.000124951	0.00358719	2.3057	down	noncoding	ENST00000421601	LINC00443	GENCODE	1172	chr13	+	107306263	107324511	NR_047026	AAGAGGTTGATCCTCCAAAATTCAAACAAGGAAAAATCTCTCCCAATCTCTCCTTTCCTC	intergenic							778.7	2032.23	9.54742	10.7526	632.181	1062.86	641.056	2075.23	1854.88	2166.58	9.41899	9.67479	9.54849	10.7211	10.7129	10.824
ASHGA5P040436	0.0258824	0.0711713	2.0149	down	noncoding	ENST00000514113	RP11-317O24.2	GENCODE	382	chr5	-	50225317	50230355		GTCCAAACTCTGCCTTTTGAAAGAATATTGATGACTAAGAAAACTTGCCCTGAATAAACT	intergenic							5.06696	21.6888	2.9078	3.91851	5.06585	5	5.13504	25.4085	21.6199	18.0379	3.09277	2.40305	3.22756	4.09616	4.02233	3.63704
ASHGA5P016719	0.0236559	0.0671007	3.81481	down	noncoding	ENST00000433357	RP11-255A11.21	GENCODE	902	chr9	+	33602498	33605291		TAAGGCATCAACCTTACCCTGTAGGAATTCTAGTGACTATGTTGCCACCATCTTGGAGCT	intergenic							7.88462	41.5141	2.97247	4.90408	5	13.6539	5	50.3061	43.8593	30.377	2.46913	3.95234	2.49594	5.15317	5.12308	4.436
ASHGA5P057863	0.00161077	0.0126789	2.97985	down	noncoding	TCONS_00022773	XLOC_011057	LincRNAs identified by Cabili et al	211	chr14	-	67649710	67652438		AACTTGAAAACATCTTCTATAGCCTTTTATACCCAATAGCATCAGCTGGGCATGGTGTCT	intergenic							5.19649	28.959	2.80167	4.37692	5.36206	5.22739	5	27.8552	27.1526	31.8691	3.15374	2.75535	2.49594	4.23859	4.37641	4.51575
ASHGA5P055906	0.0145191	0.048845	2.86881	down	noncoding	TCONS_00016244	XLOC_007628	LincRNAs identified by Cabili et al	231	chr9	-	747412	749509		TCCTTACAAGCACAGAAAAATGGATCTGTGGCAGTCATGGTTCCTGGACTTCTAGAAATG	intergenic							7.25974	35.3836	3.17221	4.69266	8.60659	8.17264	5	36.7777	34.9487	34.4245	3.75284	3.26784	2.49594	4.669	4.77372	4.63526
ASHGA5P029668	0.0148783	0.0496632	2.57801	down	noncoding	ENST00000553732	RP11-270M14.5	GENCODE	580	chr14	+	76437266	76437930		TAAGGGACCTGAGGTTCATTCTGAAATGCTTATCTGAAGGGTCCACCTACCTCTTCTCAA	natural antisense	NM_003239	TGFB3	transforming growth factor beta-3 preproprotein	-	76424441	76448092	6.46349	25.3867	2.80724	4.1735	5	9.39048	5	26.3295	26.0108	23.8199	2.46913	3.45667	2.49594	4.15082	4.31367	4.05602
ASHGA5P058426	0.0285336	0.0760806	2.05382	down	noncoding	uc003jxp.3	SMA4	UCSC_knowngene	1357	chr5	+	69140556	69416666	NR_034021, uc003jxc.4, uc003jzj.3, uc010iyh.1	GCTTCACCAGTCTTTCCCAGGGAACTCCGATGAAGTGTTCCAACAAAATGAGCGAGTGAA	intron sense-overlapping	NM_000344	SMN1	survival motor neuron protein isoform d	+	69345349	69373418	195.375	499.457	7.6327	8.67101	155.021	310.956	120.148	489.236	342.063	667.073	7.56717	7.98917	7.34177	8.6201	8.27454	9.1184
ASHGA5P058426	0.0285336	0.0760806	2.05382	down	noncoding	uc003jxp.3	SMA4	UCSC_knowngene	1357	chr5	+	69140556	69416666	NR_034021, uc003jxc.4, uc003jzj.3, uc010iyh.1	GCTTCACCAGTCTTTCCCAGGGAACTCCGATGAAGTGTTCCAACAAAATGAGCGAGTGAA	intron sense-overlapping	NM_001178087	SERF1B	small EDRK-rich factor 1 isoform 1	+	69321077	69328523	195.375	499.457	7.6327	8.67101	155.021	310.956	120.148	489.236	342.063	667.073	7.56717	7.98917	7.34177	8.6201	8.27454	9.1184
ASHGA5P058426	0.0285336	0.0760806	2.05382	down	noncoding	uc003jxp.3	SMA4	UCSC_knowngene	1357	chr5	+	69140556	69416666	NR_034021, uc003jxc.4, uc003jzj.3, uc010iyh.1	GCTTCACCAGTCTTTCCCAGGGAACTCCGATGAAGTGTTCCAACAAAATGAGCGAGTGAA	intron sense-overlapping	NM_017411	SMN2	survival motor neuron protein isoform d	+	69345349	69373422	195.375	499.457	7.6327	8.67101	155.021	310.956	120.148	489.236	342.063	667.073	7.56717	7.98917	7.34177	8.6201	8.27454	9.1184
ASHGA5P058426	0.0285336	0.0760806	2.05382	down	noncoding	uc003jxp.3	SMA4	UCSC_knowngene	1357	chr5	+	69140556	69416666	NR_034021, uc003jxc.4, uc003jzj.3, uc010iyh.1	GCTTCACCAGTCTTTCCCAGGGAACTCCGATGAAGTGTTCCAACAAAATGAGCGAGTGAA	intron sense-overlapping	NM_021967	SERF1A	small EDRK-rich factor 1 isoform 1	+	69321071	69338940	195.375	499.457	7.6327	8.67101	155.021	310.956	120.148	489.236	342.063	667.073	7.56717	7.98917	7.34177	8.6201	8.27454	9.1184
ASHGA5P058426	0.0285336	0.0760806	2.05382	down	noncoding	uc003jxp.3	SMA4	UCSC_knowngene	1357	chr5	+	69140556	69416666	NR_034021, uc003jxc.4, uc003jzj.3, uc010iyh.1	GCTTCACCAGTCTTTCCCAGGGAACTCCGATGAAGTGTTCCAACAAAATGAGCGAGTGAA	intron sense-overlapping	NM_022874	SMN1	survival motor neuron protein isoform b	+	69345349	69373418	195.375	499.457	7.6327	8.67101	155.021	310.956	120.148	489.236	342.063	667.073	7.56717	7.98917	7.34177	8.6201	8.27454	9.1184
ASHGA5P058426	0.0285336	0.0760806	2.05382	down	noncoding	uc003jxp.3	SMA4	UCSC_knowngene	1357	chr5	+	69140556	69416666	NR_034021, uc003jxc.4, uc003jzj.3, uc010iyh.1	GCTTCACCAGTCTTTCCCAGGGAACTCCGATGAAGTGTTCCAACAAAATGAGCGAGTGAA	intron sense-overlapping	NM_022875	SMN2	survival motor neuron protein isoform a	+	69345349	69373422	195.375	499.457	7.6327	8.67101	155.021	310.956	120.148	489.236	342.063	667.073	7.56717	7.98917	7.34177	8.6201	8.27454	9.1184
ASHGA5P058426	0.0285336	0.0760806	2.05382	down	noncoding	uc003jxp.3	SMA4	UCSC_knowngene	1357	chr5	+	69140556	69416666	NR_034021, uc003jxc.4, uc003jzj.3, uc010iyh.1	GCTTCACCAGTCTTTCCCAGGGAACTCCGATGAAGTGTTCCAACAAAATGAGCGAGTGAA	intron sense-overlapping	NM_022876	SMN2	survival motor neuron protein isoform b	+	69345349	69373422	195.375	499.457	7.6327	8.67101	155.021	310.956	120.148	489.236	342.063	667.073	7.56717	7.98917	7.34177	8.6201	8.27454	9.1184
ASHGA5P058426	0.0285336	0.0760806	2.05382	down	noncoding	uc003jxp.3	SMA4	UCSC_knowngene	1357	chr5	+	69140556	69416666	NR_034021, uc003jxc.4, uc003jzj.3, uc010iyh.1	GCTTCACCAGTCTTTCCCAGGGAACTCCGATGAAGTGTTCCAACAAAATGAGCGAGTGAA	intron sense-overlapping	NM_022877	SMN2	survival motor neuron protein isoform c	+	69345349	69373422	195.375	499.457	7.6327	8.67101	155.021	310.956	120.148	489.236	342.063	667.073	7.56717	7.98917	7.34177	8.6201	8.27454	9.1184
ASHGA5P058426	0.0285336	0.0760806	2.05382	down	noncoding	uc003jxp.3	SMA4	UCSC_knowngene	1357	chr5	+	69140556	69416666	NR_034021, uc003jxc.4, uc003jzj.3, uc010iyh.1	GCTTCACCAGTCTTTCCCAGGGAACTCCGATGAAGTGTTCCAACAAAATGAGCGAGTGAA	intron sense-overlapping	NM_022968	SERF1A	small EDRK-rich factor 1 isoform 2	+	69321071	69328525	195.375	499.457	7.6327	8.67101	155.021	310.956	120.148	489.236	342.063	667.073	7.56717	7.98917	7.34177	8.6201	8.27454	9.1184
ASHGA5P058426	0.0285336	0.0760806	2.05382	down	noncoding	uc003jxp.3	SMA4	UCSC_knowngene	1357	chr5	+	69140556	69416666	NR_034021, uc003jxc.4, uc003jzj.3, uc010iyh.1	GCTTCACCAGTCTTTCCCAGGGAACTCCGATGAAGTGTTCCAACAAAATGAGCGAGTGAA	intron sense-overlapping	NM_022978	SERF1B	small EDRK-rich factor 1 isoform 2	+	69321077	69338934	195.375	499.457	7.6327	8.67101	155.021	310.956	120.148	489.236	342.063	667.073	7.56717	7.98917	7.34177	8.6201	8.27454	9.1184
ASHGA5P044911	0.0313989	0.0810332	2.465	down	noncoding	ENST00000519041	RP11-386D6.1	GENCODE	804	chr8	+	87719774	87777251		CTTACATGAAGGTATAGAGGTAGGCTCATCACTTTTACCCAAACTCAAAAAACTGAATTT	intronic antisense	NM_019098	CNGB3	cyclic nucleotide-gated cation channel beta-3	-	87586162	87755903	5.27551	23.9354	2.75139	4.05298	5	5	5.82653	18.2779	26.4501	27.0782	2.46913	2.40305	3.382	3.56234	4.33722	4.25939
ASHGA5P041481	0.000522768	0.00699943	2.18148	down	noncoding	AA584758		LincRNAs identified by Khalil et al	411	chr14	-	55588450	55588861		CATTCACACATTATCATATCTACTGTCCTCCAGACTTCTGCTCTGGTAGAAGTAGAGGAC	intergenic							18.0723	69.0675	4.58459	5.70989	14.6081	25.547	14.0617	75.5826	66.1791	65.4409	4.45486	4.77491	4.52399	5.76699	5.75742	5.60527
ASHGA5P042803	0.00358111	0.0201816	2.18606	down	noncoding	TCONS_00019909	XLOC_009146	LincRNAs identified by Cabili et al	961	chr11	+	61267236	61274123	TCONS_00019314, TCONS_00019315	CTAACACCTCTTGCCATATTAGAATTGCTATTGCTCTGTCCTTTCATTCATGTATCCAAC	intergenic							59.5629	198.879	6.19704	7.32537	62.1507	60.0904	56.4475	198.065	204.427	194.144	6.36348	5.87203	6.35563	7.24081	7.49773	7.23757
ASHGA5P019022	0.00018137	0.00424216	3.0194	down	noncoding	uc010lws.1	ADAM5P	UCSC_knowngene	383	chr8	+	39172181	39181858		GGGATGCATGCAGACCTCAATCAATTTTATCTTCAGCTTCTGTTATTAATTCTTATGACG	intergenic							5	23.49	2.45604	4.0503	5	5	5	21.4296	24.3245	24.7161	2.46913	2.40305	2.49594	3.82462	4.21025	4.11604
ASHGA5P047987	0.00129204	0.0112371	2.07506	down	noncoding	ENST00000530569	CTD-2140G10.2	GENCODE	525	chr11	-	22339297	22359770	ENST00000528009, ENST00000531304	ATGGTGTCTTTGCTGTAAGGAGCAGAGCATATTCAAAACTCATGGGAGCATCTCAGGTCT	natural antisense	NM_020346	SLC17A6	vesicular glutamate transporter 2	+	22359666	22401046	5	16.7797	2.45604	3.5092	5	5	5	20.2805	13.4878	16.5708	2.46913	2.40305	2.49594	3.73539	3.2928	3.49941
ASHGA5P026900	0.00480555	0.0242932	2.78553	down	noncoding	BU663229		LincRNAs identified by Khalil et al	555	chr1	-	39183439	39183984		ATGGGTTTATGAAAACTGCCTCTGATTGCCATCAGGTGTGAGGTTGTTGACCATTCCTCA	intergenic							5	22.2287	2.45604	3.93399	5	5	5	26.2103	24.7818	15.6941	2.46913	2.40305	2.49594	4.1438	4.24058	3.41761
ASHGA5P038759	7.6045e-07	0.000748815	3.10601	down	noncoding	ENST00000412811	RP11-761N21.1	GENCODE	500	chr3	+	40807697	40904117		AAGGTATCATCTCTTCTCTATCAATGACTTGGGTGATACTTCTGGCAACAAAACAGACAG	intergenic							5	24.0803	2.45604	4.0911	5	5	5	25.0808	22.9713	24.1887	2.46913	2.40305	2.49594	4.07451	4.11855	4.08026
ASHGA5P033512	0.00393968	0.0214687	2.85662	down	noncoding	ENST00000579467	RP11-143J12.3	GENCODE	544	chr18	-	9112401	9115875		AGTTCTTTCCCTGTCTTACTATCACCACTATTTCAGACATTATTTCATGTCTGTGCATTA	intronic antisense	NM_021074	NDUFV2	NADH dehydrogenase [ubiquinone] flavoprotein 2, mitochondrial precursor	+	9102627	9134343	64.3568	257.757	6.19386	7.70817	37.8154	97.7207	57.5344	289.212	241.684	242.376	5.71295	6.48955	6.37909	7.81165	7.74634	7.56652
ASHGA5P038472	0.00934685	0.0370451	3.17055	down	noncoding	ENST00000485338	PLS1-AS1	GENCODE	346	chr3	-	142373625	142375587		GGAGATGAAGAGTTTCTATACGTCAATAACCAGTTCTCTTCATTCACTTACCCATTTATT	intronic antisense	NM_001145319	PLS1	plastin-1	+	142315228	142432505	5.43365	30.2398	2.7846	4.44934	5	5	6.30095	29.5397	30.4063	30.7733	2.46913	2.40305	3.48163	4.33678	4.55343	4.4578
ASHGA5P038472	0.00934685	0.0370451	3.17055	down	noncoding	ENST00000485338	PLS1-AS1	GENCODE	346	chr3	-	142373625	142375587		GGAGATGAAGAGTTTCTATACGTCAATAACCAGTTCTCTTCATTCACTTACCCATTTATT	intronic antisense	NM_002670	PLS1	plastin-1	+	142342265	142432505	5.43365	30.2398	2.7846	4.44934	5	5	6.30095	29.5397	30.4063	30.7733	2.46913	2.40305	3.48163	4.33678	4.55343	4.4578
ASHGA5P022404	0.00223529	0.0153868	2.80915	down	noncoding	ENST00000556182	RP11-363J20.1	GENCODE	553	chr14	-	69650790	69658137		TTGTTACTGGGATGGTAAGGTTCAGCAAAGTCTATGTCATTCTCTAATCCTTTTGATCCA	bidirectional	NM_001193360	EXD2	exonuclease 3'-5' domain-containing protein 2 isoform 1	+	69658193	69710737	5	22.1519	2.45604	3.94617	5	5	5	19.1797	26.8088	20.4673	2.46913	2.40305	2.49594	3.64856	4.357	3.83296
ASHGA5P022404	0.00223529	0.0153868	2.80915	down	noncoding	ENST00000556182	RP11-363J20.1	GENCODE	553	chr14	-	69650790	69658137		TTGTTACTGGGATGGTAAGGTTCAGCAAAGTCTATGTCATTCTCTAATCCTTTTGATCCA	bidirectional	NM_001193361	EXD2	exonuclease 3'-5' domain-containing protein 2 isoform 1	+	69658193	69710737	5	22.1519	2.45604	3.94617	5	5	5	19.1797	26.8088	20.4673	2.46913	2.40305	2.49594	3.64856	4.357	3.83296
ASHGA5P022404	0.00223529	0.0153868	2.80915	down	noncoding	ENST00000556182	RP11-363J20.1	GENCODE	553	chr14	-	69650790	69658137		TTGTTACTGGGATGGTAAGGTTCAGCAAAGTCTATGTCATTCTCTAATCCTTTTGATCCA	bidirectional	NM_001193362	EXD2	exonuclease 3'-5' domain-containing protein 2 isoform 1	+	69658482	69710737	5	22.1519	2.45604	3.94617	5	5	5	19.1797	26.8088	20.4673	2.46913	2.40305	2.49594	3.64856	4.357	3.83296
ASHGA5P022404	0.00223529	0.0153868	2.80915	down	noncoding	ENST00000556182	RP11-363J20.1	GENCODE	553	chr14	-	69650790	69658137		TTGTTACTGGGATGGTAAGGTTCAGCAAAGTCTATGTCATTCTCTAATCCTTTTGATCCA	bidirectional	NM_001193363	EXD2	exonuclease 3'-5' domain-containing protein 2 isoform 1	+	69658482	69710737	5	22.1519	2.45604	3.94617	5	5	5	19.1797	26.8088	20.4673	2.46913	2.40305	2.49594	3.64856	4.357	3.83296
ASHGA5P022404	0.00223529	0.0153868	2.80915	down	noncoding	ENST00000556182	RP11-363J20.1	GENCODE	553	chr14	-	69650790	69658137		TTGTTACTGGGATGGTAAGGTTCAGCAAAGTCTATGTCATTCTCTAATCCTTTTGATCCA	bidirectional	NM_018199	EXD2	exonuclease 3'-5' domain-containing protein 2 isoform 2	+	69658193	69710737	5	22.1519	2.45604	3.94617	5	5	5	19.1797	26.8088	20.4673	2.46913	2.40305	2.49594	3.64856	4.357	3.83296
ASHGA5P019314	0.0206254	0.0613126	2.71556	down	noncoding	ENST00000477993	FABP5P3	GENCODE	1027	chr7	+	152133979	152140272		AATCCAACGCCAGCAAGTCATCTTTGCACTCATAACCACATCTTTTATGGAACATCAAGC	bidirectional	NM_170606	MLL3	histone-lysine N-methyltransferase MLL3	-	151832009	152133090	7.77053	35.1348	3.23639	4.67764	7.5241	10.7875	5	36.6843	37.4943	31.2257	3.56989	3.64334	2.49594	4.66557	4.88293	4.48443
ASHGA5P028870	0.00309706	0.0184997	2.5182	down	noncoding	ENST00000423629	LINC00381	GENCODE	727	chr13	+	74993309	75009296		CTTCCTGGTTGCTGTGAGGATTCAATCTAATAATATATATTAGAATGTTCCTGAACCTCT	bidirectional	ENST00000325811	AL355390.1	Uncharacterized protein [Source:UniProtKB/TrEMBL;Acc:E7EXB8]	-	74987093	74993252	12.7886	59.2873	4.13754	5.46993	8.89011	16.7332	12.7424	70.0729	55.3692	52.4197	3.79565	4.21765	4.39932	5.6526	5.47813	5.27907
ASHGA5P038056	0.000417335	0.00626926	3.06974	down	noncoding	ENST00000445039	RP4-784A16.5	GENCODE	326	chr1	+	53793920	53802890	uc001cvn.1	GTCTTCCTCATCTTTGTCTTCAGAGGATAAATACAAGGCCTGACACATAACAAGCATGAG	bidirectional	NM_001018054	LRP8	low-density lipoprotein receptor-related protein 8 isoform 4 precursor	-	53708040	53793821	48.8036	231.335	5.92627	7.54439	52.4758	54.5734	39.3617	264.908	219.208	209.891	6.13829	5.75216	5.88837	7.67577	7.60552	7.35188
ASHGA5P038056	0.000417335	0.00626926	3.06974	down	noncoding	ENST00000445039	RP4-784A16.5	GENCODE	326	chr1	+	53793920	53802890	uc001cvn.1	GTCTTCCTCATCTTTGTCTTCAGAGGATAAATACAAGGCCTGACACATAACAAGCATGAG	bidirectional	NM_004631	LRP8	low-density lipoprotein receptor-related protein 8 isoform 1 precursor	-	53708040	53793821	48.8036	231.335	5.92627	7.54439	52.4758	54.5734	39.3617	264.908	219.208	209.891	6.13829	5.75216	5.88837	7.67577	7.60552	7.35188
ASHGA5P038056	0.000417335	0.00626926	3.06974	down	noncoding	ENST00000445039	RP4-784A16.5	GENCODE	326	chr1	+	53793920	53802890	uc001cvn.1	GTCTTCCTCATCTTTGTCTTCAGAGGATAAATACAAGGCCTGACACATAACAAGCATGAG	bidirectional	NM_017522	LRP8	low-density lipoprotein receptor-related protein 8 isoform 3 precursor	-	53708040	53793821	48.8036	231.335	5.92627	7.54439	52.4758	54.5734	39.3617	264.908	219.208	209.891	6.13829	5.75216	5.88837	7.67577	7.60552	7.35188
ASHGA5P038056	0.000417335	0.00626926	3.06974	down	noncoding	ENST00000445039	RP4-784A16.5	GENCODE	326	chr1	+	53793920	53802890	uc001cvn.1	GTCTTCCTCATCTTTGTCTTCAGAGGATAAATACAAGGCCTGACACATAACAAGCATGAG	bidirectional	NM_033300	LRP8	low-density lipoprotein receptor-related protein 8 isoform 2 precursor	-	53708040	53793821	48.8036	231.335	5.92627	7.54439	52.4758	54.5734	39.3617	264.908	219.208	209.891	6.13829	5.75216	5.88837	7.67577	7.60552	7.35188
ASHGA5P047357	0.000588027	0.00743187	2.28197	down	noncoding	CD245860		LincRNAs identified by Khalil et al	1020	chr2	-	232745078	232745532		CCCAGGCACATGTACAACTCGATTGTTTCTGCTTTTATGCCCCTCTATAACAGTGTTATA	intergenic							39.1608	143.174	5.63215	6.82243	37.1292	49.2334	31.1197	139.496	153.717	136.309	5.68853	5.61523	5.5927	6.70399	7.05623	6.70708
ASHGA5P036572	0.0201811	0.0604021	2.06879	down	noncoding	ENST00000446029	AC079612.2	GENCODE	348	chr2	+	240547391	240552533		TTTAGAAATGTCAGCAGGAGAGACCCACTTCCCTTTTAACCCATGGAGTCAGGAGGAGAG	intergenic							34.889	113.549	5.40151	6.45029	20.0749	53.2287	31.3635	130.62	91.4855	118.543	4.88092	5.71993	5.60366	6.59761	6.26073	6.49253
ASHGA5P045774	0.0012714	0.011147	2.91882	down	noncoding	uc004ajp.3	BC043649	UCSC_knowngene	1811	chr9	+	77567884	77612302		GAGTACAGGTTGTCCCAGTCTCAGAGTTCAGAGAAAAATAAACAAAAACTTTCTATGTTG	natural antisense	NM_152420	C9orf41	UPF0586 protein C9orf41	-	77597872	77643310	7.115	41.8093	3.40438	4.94977	6.32873	7.57111	7.44515	38.7501	44.5008	42.177	3.35815	3.16458	3.69042	4.75181	5.14607	4.95142
ASHGA5P018303	0.0359434	0.089141	2.42493	down	noncoding	ENST00000503711	CSN1S2AP	GENCODE	500	chr4	+	70934799	70950837	ENST00000451783, ENST00000512167	TTGAGCTTGAGTATGACTAGAAAAATCATTCCTTTATAATTTCTTCATCTACCACATCAC	intergenic							5.34477	23.7794	2.76523	4.04317	5	5	6.03431	18.2424	26.8967	26.1989	2.46913	2.40305	3.42351	3.55984	4.36182	4.20785
ASHGA5P042842	0.000212317	0.0045204	5.04871	down	noncoding	TCONS_00019806	XLOC_009606	LincRNAs identified by Cabili et al	338	chr11	-	130650470	130654253		TATGTAATTTGCTCATGGTCCACAGCCTACATTCTTCAGTATGTGCAGGGAAGACCTGGT	intergenic							5.27115	42.1089	2.6078	4.94372	5	5.81345	5	51.9288	36.9106	37.4875	2.46913	2.85834	2.49594	5.20188	4.86047	4.7688
ASHGA5P045902	0.000381314	0.00598759	2.34782	down	noncoding	ENST00000449457	RP11-445P17.8	GENCODE	692	chr10	-	5307995	5313199		AACATTGGCAGTTTCAGTTAGGAACTCATATTCCTGTTGGGTCAGAGATTGAGCCCTGGA	intergenic							5.16972	20.2196	2.58791	3.81923	5	5.50915	5	21.9866	19.2495	19.4227	2.46913	2.79867	2.49594	3.86787	3.83942	3.75041
ASHGA5P015685	0.000746769	0.00834669	2.63257	down	noncoding	ENST00000422548	RP5-968D22.1	GENCODE	389	chr1	-	168370720	168376512		TACTTTCAAGGACTTATAGGAGCAGAAATCAGAAGACTTTACTCCACACACTTCAGGTGG	intergenic							5	20.734	2.45604	3.85251	5	5	5	20.4693	23.3739	18.3588	2.46913	2.40305	2.49594	3.75003	4.1438	3.66372
ASHGA5P043101	0.013405	0.0464376	2.77432	down	noncoding	ENST00000412091	GS1-124K5.3	GENCODE	682	chr7	-	65956995	65958553		TAAATGCAGATCTGAACCATACCCAGTTGGGATTGGGGTACACACTCTACTCCTCTGAAA	intergenic							7.42517	34.6244	3.18894	4.66108	7.44344	9.83207	5	34.9001	33.0794	35.8936	3.5581	3.51279	2.49594	4.59616	4.68576	4.70131
ASHGA5P040013	0.0394802	0.0953197	2.29717	down	noncoding	TCONS_00022420	XLOC_010752	LincRNAs identified by Cabili et al	1966	chr14	+	21258298	21267971		ATCCCACTAATGCTGTGTTCCAGCTACGATTTTAATCAAAGGTGCGCTCCCTGAGAAAGT	intergenic							7.92408	30.7375	3.27038	4.47023	8.87038	9.90188	5	33.0545	26.9838	32.1741	3.79317	3.52203	2.49594	4.51181	4.36795	4.53095
ASHGA5P023466	0.0138336	0.0473643	3.08746	down	noncoding	ENST00000581541	RP11-25L3.3	GENCODE	493	chr18	-	71581639	71701396		ATGTCTGGAGTATCTACACCCTTTCTTCACATTTATAGGCAACAGAAAGAAATTCTTCAC	intergenic							6.24767	37.4318	3.15147	4.7779	6.59157	5	7.15145	36.1144	35.0496	41.1314	3.40705	2.40305	3.64432	4.64203	4.77852	4.91314
ASHGA5P026497	0.000390036	0.00605786	2.06221	down	noncoding	ENST00000444862	AP005273.1	GENCODE	522	chr11	+	64268324	64272858		TGTGAGCCCTTTGAAGACCTGATGGAAGCTATTGGACAGTAGAAGACACAGAGTGTACAT	intergenic							5	16.6204	2.45604	3.50023	5	5	5	19.5636	14.2596	16.0379	2.46913	2.40305	2.49594	3.67711	3.37505	3.44854
ASHGA5P020468	0.00259895	0.0168069	4.82509	down	noncoding	ENST00000514126	CTD-2516F10.2	GENCODE	727	chr11	-	7448496	7461756		ACATTGGGAAGGGGGGTTCCAACTCTTTTAAGGTCTCATCTTCAGCACTTCTAAACTGTG	intronic antisense	NM_175733	SYT9	synaptotagmin-9	+	7273180	7490276	6.88868	54.6312	3.08221	5.35276	5.50394	10.1621	5	53.767	60.4087	49.7179	3.18647	3.56421	2.49594	5.25173	5.61456	5.192
ASHGA5P056723	0.0034794	0.0198503	3.27343	down	noncoding	TCONS_00008047	XLOC_003511	LincRNAs identified by Cabili et al	454	chr4	+	38533852	38548334		TAGACTACGCTAAAAGGTTCTTGGCCTTTGTAGAAGGGGATGGTTCATTGTTGTCCCACT	intergenic							5	25.88	2.45604	4.16684	5	5	5	29.9758	29.7778	17.8864	2.46913	2.40305	2.49594	4.35836	4.51828	3.62389
ASHGA5P058528	0.00148885	0.012091	2.24638	down	noncoding	uc009yiz.3	BDNF-AS1	UCSC_knowngene	1264	chr11	+	27528398	27719718	uc009yij.3, uc009yim.3, uc009yip.3, uc009yir.3, uc009yiw.3	GCAGCCTTCATGCAACCAAAGTATGAAATAACCATAAGATACTCTATTATAGCAAAGAAG	natural antisense	NM_001143805	BDNF	brain-derived neurotrophic factor isoform a preproprotein	-	27676441	27742326	5	17.9498	2.45604	3.62365	5	5	5	17.6588	20.1974	15.993	2.46913	2.40305	2.49594	3.50992	3.91714	3.44387
ASHGA5P058528	0.00148885	0.012091	2.24638	down	noncoding	uc009yiz.3	BDNF-AS1	UCSC_knowngene	1264	chr11	+	27528398	27719718	uc009yij.3, uc009yim.3, uc009yip.3, uc009yir.3, uc009yiw.3	GCAGCCTTCATGCAACCAAAGTATGAAATAACCATAAGATACTCTATTATAGCAAAGAAG	natural antisense	NM_001143806	BDNF	brain-derived neurotrophic factor isoform a preproprotein	-	27676441	27742326	5	17.9498	2.45604	3.62365	5	5	5	17.6588	20.1974	15.993	2.46913	2.40305	2.49594	3.50992	3.91714	3.44387
ASHGA5P058528	0.00148885	0.012091	2.24638	down	noncoding	uc009yiz.3	BDNF-AS1	UCSC_knowngene	1264	chr11	+	27528398	27719718	uc009yij.3, uc009yim.3, uc009yip.3, uc009yir.3, uc009yiw.3	GCAGCCTTCATGCAACCAAAGTATGAAATAACCATAAGATACTCTATTATAGCAAAGAAG	natural antisense	NM_001143807	BDNF	brain-derived neurotrophic factor isoform a preproprotein	-	27676441	27741294	5	17.9498	2.45604	3.62365	5	5	5	17.6588	20.1974	15.993	2.46913	2.40305	2.49594	3.50992	3.91714	3.44387
ASHGA5P058528	0.00148885	0.012091	2.24638	down	noncoding	uc009yiz.3	BDNF-AS1	UCSC_knowngene	1264	chr11	+	27528398	27719718	uc009yij.3, uc009yim.3, uc009yip.3, uc009yir.3, uc009yiw.3	GCAGCCTTCATGCAACCAAAGTATGAAATAACCATAAGATACTCTATTATAGCAAAGAAG	natural antisense	NM_001143808	BDNF	brain-derived neurotrophic factor isoform a preproprotein	-	27676441	27722600	5	17.9498	2.45604	3.62365	5	5	5	17.6588	20.1974	15.993	2.46913	2.40305	2.49594	3.50992	3.91714	3.44387
ASHGA5P058528	0.00148885	0.012091	2.24638	down	noncoding	uc009yiz.3	BDNF-AS1	UCSC_knowngene	1264	chr11	+	27528398	27719718	uc009yij.3, uc009yim.3, uc009yip.3, uc009yir.3, uc009yiw.3	GCAGCCTTCATGCAACCAAAGTATGAAATAACCATAAGATACTCTATTATAGCAAAGAAG	natural antisense	NM_001143809	BDNF	brain-derived neurotrophic factor isoform d preproprotein	-	27676441	27722600	5	17.9498	2.45604	3.62365	5	5	5	17.6588	20.1974	15.993	2.46913	2.40305	2.49594	3.50992	3.91714	3.44387
ASHGA5P058528	0.00148885	0.012091	2.24638	down	noncoding	uc009yiz.3	BDNF-AS1	UCSC_knowngene	1264	chr11	+	27528398	27719718	uc009yij.3, uc009yim.3, uc009yip.3, uc009yir.3, uc009yiw.3	GCAGCCTTCATGCAACCAAAGTATGAAATAACCATAAGATACTCTATTATAGCAAAGAAG	natural antisense	NM_001143810	BDNF	brain-derived neurotrophic factor isoform e	-	27676441	27722600	5	17.9498	2.45604	3.62365	5	5	5	17.6588	20.1974	15.993	2.46913	2.40305	2.49594	3.50992	3.91714	3.44387
ASHGA5P058528	0.00148885	0.012091	2.24638	down	noncoding	uc009yiz.3	BDNF-AS1	UCSC_knowngene	1264	chr11	+	27528398	27719718	uc009yij.3, uc009yim.3, uc009yip.3, uc009yir.3, uc009yiw.3	GCAGCCTTCATGCAACCAAAGTATGAAATAACCATAAGATACTCTATTATAGCAAAGAAG	natural antisense	NM_001143811	BDNF	brain-derived neurotrophic factor isoform a preproprotein	-	27676441	27722600	5	17.9498	2.45604	3.62365	5	5	5	17.6588	20.1974	15.993	2.46913	2.40305	2.49594	3.50992	3.91714	3.44387
ASHGA5P058528	0.00148885	0.012091	2.24638	down	noncoding	uc009yiz.3	BDNF-AS1	UCSC_knowngene	1264	chr11	+	27528398	27719718	uc009yij.3, uc009yim.3, uc009yip.3, uc009yir.3, uc009yiw.3	GCAGCCTTCATGCAACCAAAGTATGAAATAACCATAAGATACTCTATTATAGCAAAGAAG	natural antisense	NM_001143812	BDNF	brain-derived neurotrophic factor isoform a preproprotein	-	27676441	27722447	5	17.9498	2.45604	3.62365	5	5	5	17.6588	20.1974	15.993	2.46913	2.40305	2.49594	3.50992	3.91714	3.44387
ASHGA5P058528	0.00148885	0.012091	2.24638	down	noncoding	uc009yiz.3	BDNF-AS1	UCSC_knowngene	1264	chr11	+	27528398	27719718	uc009yij.3, uc009yim.3, uc009yip.3, uc009yir.3, uc009yiw.3	GCAGCCTTCATGCAACCAAAGTATGAAATAACCATAAGATACTCTATTATAGCAAAGAAG	natural antisense	NM_001143813	BDNF	brain-derived neurotrophic factor isoform a preproprotein	-	27676441	27722035	5	17.9498	2.45604	3.62365	5	5	5	17.6588	20.1974	15.993	2.46913	2.40305	2.49594	3.50992	3.91714	3.44387
ASHGA5P058528	0.00148885	0.012091	2.24638	down	noncoding	uc009yiz.3	BDNF-AS1	UCSC_knowngene	1264	chr11	+	27528398	27719718	uc009yij.3, uc009yim.3, uc009yip.3, uc009yir.3, uc009yiw.3	GCAGCCTTCATGCAACCAAAGTATGAAATAACCATAAGATACTCTATTATAGCAAAGAAG	natural antisense	NM_001143814	BDNF	brain-derived neurotrophic factor isoform a preproprotein	-	27676441	27722035	5	17.9498	2.45604	3.62365	5	5	5	17.6588	20.1974	15.993	2.46913	2.40305	2.49594	3.50992	3.91714	3.44387
ASHGA5P058528	0.00148885	0.012091	2.24638	down	noncoding	uc009yiz.3	BDNF-AS1	UCSC_knowngene	1264	chr11	+	27528398	27719718	uc009yij.3, uc009yim.3, uc009yip.3, uc009yir.3, uc009yiw.3	GCAGCCTTCATGCAACCAAAGTATGAAATAACCATAAGATACTCTATTATAGCAAAGAAG	natural antisense	NM_001143816	BDNF	brain-derived neurotrophic factor isoform a preproprotein	-	27676441	27681196	5	17.9498	2.45604	3.62365	5	5	5	17.6588	20.1974	15.993	2.46913	2.40305	2.49594	3.50992	3.91714	3.44387
ASHGA5P058528	0.00148885	0.012091	2.24638	down	noncoding	uc009yiz.3	BDNF-AS1	UCSC_knowngene	1264	chr11	+	27528398	27719718	uc009yij.3, uc009yim.3, uc009yip.3, uc009yir.3, uc009yiw.3	GCAGCCTTCATGCAACCAAAGTATGAAATAACCATAAGATACTCTATTATAGCAAAGAAG	natural antisense	NM_001709	BDNF	brain-derived neurotrophic factor isoform a preproprotein	-	27676441	27722035	5	17.9498	2.45604	3.62365	5	5	5	17.6588	20.1974	15.993	2.46913	2.40305	2.49594	3.50992	3.91714	3.44387
ASHGA5P058528	0.00148885	0.012091	2.24638	down	noncoding	uc009yiz.3	BDNF-AS1	UCSC_knowngene	1264	chr11	+	27528398	27719718	uc009yij.3, uc009yim.3, uc009yip.3, uc009yir.3, uc009yiw.3	GCAGCCTTCATGCAACCAAAGTATGAAATAACCATAAGATACTCTATTATAGCAAAGAAG	natural antisense	NM_170731	BDNF	brain-derived neurotrophic factor isoform b preproprotein	-	27676441	27743605	5	17.9498	2.45604	3.62365	5	5	5	17.6588	20.1974	15.993	2.46913	2.40305	2.49594	3.50992	3.91714	3.44387
ASHGA5P058528	0.00148885	0.012091	2.24638	down	noncoding	uc009yiz.3	BDNF-AS1	UCSC_knowngene	1264	chr11	+	27528398	27719718	uc009yij.3, uc009yim.3, uc009yip.3, uc009yir.3, uc009yiw.3	GCAGCCTTCATGCAACCAAAGTATGAAATAACCATAAGATACTCTATTATAGCAAAGAAG	natural antisense	NM_170732	BDNF	brain-derived neurotrophic factor isoform a preproprotein	-	27676441	27742326	5	17.9498	2.45604	3.62365	5	5	5	17.6588	20.1974	15.993	2.46913	2.40305	2.49594	3.50992	3.91714	3.44387
ASHGA5P058528	0.00148885	0.012091	2.24638	down	noncoding	uc009yiz.3	BDNF-AS1	UCSC_knowngene	1264	chr11	+	27528398	27719718	uc009yij.3, uc009yim.3, uc009yip.3, uc009yir.3, uc009yiw.3	GCAGCCTTCATGCAACCAAAGTATGAAATAACCATAAGATACTCTATTATAGCAAAGAAG	natural antisense	NM_170733	BDNF	brain-derived neurotrophic factor isoform a preproprotein	-	27676441	27723180	5	17.9498	2.45604	3.62365	5	5	5	17.6588	20.1974	15.993	2.46913	2.40305	2.49594	3.50992	3.91714	3.44387
ASHGA5P058528	0.00148885	0.012091	2.24638	down	noncoding	uc009yiz.3	BDNF-AS1	UCSC_knowngene	1264	chr11	+	27528398	27719718	uc009yij.3, uc009yim.3, uc009yip.3, uc009yir.3, uc009yiw.3	GCAGCCTTCATGCAACCAAAGTATGAAATAACCATAAGATACTCTATTATAGCAAAGAAG	natural antisense	NM_170734	BDNF	brain-derived neurotrophic factor isoform c preproprotein	-	27676441	27721214	5	17.9498	2.45604	3.62365	5	5	5	17.6588	20.1974	15.993	2.46913	2.40305	2.49594	3.50992	3.91714	3.44387
ASHGA5P058528	0.00148885	0.012091	2.24638	down	noncoding	uc009yiz.3	BDNF-AS1	UCSC_knowngene	1264	chr11	+	27528398	27719718	uc009yij.3, uc009yim.3, uc009yip.3, uc009yir.3, uc009yiw.3	GCAGCCTTCATGCAACCAAAGTATGAAATAACCATAAGATACTCTATTATAGCAAAGAAG	natural antisense	NM_170735	BDNF	brain-derived neurotrophic factor isoform a preproprotein	-	27676441	27681196	5	17.9498	2.45604	3.62365	5	5	5	17.6588	20.1974	15.993	2.46913	2.40305	2.49594	3.50992	3.91714	3.44387
ASHGA5P031784	0.00403549	0.021819	2.09436	down	noncoding	ENST00000557953	RP11-324D17.2	GENCODE	451	chr16	+	54273604	54274566		TCGGATCTGCATCTGGCCCAGAAGAACATTTTTGAGGATCTTTTGAAAGTATCACTAAGA	intergenic							5	17.0487	2.45604	3.52255	5	5	5	21.0862	12.6631	17.3969	2.46913	2.40305	2.49594	3.79807	3.19091	3.57868
ASHGA5P020937	0.00684363	0.0303897	2.10636	down	noncoding	ENST00000522274	RP11-96G10.1	GENCODE	600	chr5	-	161851383	161854351		GTGGTAAAAGATCTCAGCCTCCATAACTTTAAAAATGGTATAAATTATATCGTTTAAAAA	intergenic							17.2188	66.7644	4.56923	5.64398	18.6564	17.009	15.9911	64.3364	56.8214	79.1354	4.78332	4.23822	4.68614	5.5227	5.51445	5.89479
ASHGA5P032920	0.00355849	0.0201068	2.46286	down	noncoding	ENST00000435953	CTB-187M2.1	GENCODE	543	chr17	+	19360392	19361712		TAGCCTGGTCAAGTGATTTCAAGTGGGTCCTCACCACTAAAAAGAGGAAGATGGACAAAC	intergenic							5.20244	21.5234	2.5939	3.89424	5	5.60732	5	18.7194	19.3772	26.4737	2.46913	2.81663	2.49594	3.60599	3.85216	4.22457
ASHGA5P055110	0.00033454	0.00563114	2.26123	down	noncoding	TCONS_00016144	XLOC_007542	LincRNAs identified by Cabili et al	231	chr9	+	121713384	121742624		TCATCTTATTTCTCATCTGCTGGTCCCATCAACCCTAACTTTGTATCTGCTAAAACTCAG	intergenic							49.0195	172.952	5.93285	7.10996	42.8621	56.6649	47.5316	179.37	163.3	176.187	5.87261	5.79715	6.12879	7.08276	7.15607	7.09105
ASHGA5P025820	0.0217498	0.0634134	2.34851	down	noncoding	NR_038250	LOC100507433	RefSeq	2465	chr19	+	38042272	38078248		GGATTGCGAGGGCTCACCTGAAACTTCATGTACCATTGCACTTCCTGAGAAGCTGTCCCC	exon sense-overlapping	NM_152606	ZNF540	zinc finger protein 540 isoform a	+	38042272	38105079	17.7296	67.437	4.43302	5.66477	14.8547	29.9356	8.39855	76.7259	57.2475	68.3375	4.47743	4.97817	3.84346	5.79475	5.52634	5.67321
ASHGA5P025820	0.0217498	0.0634134	2.34851	down	noncoding	NR_038250	LOC100507433	RefSeq	2465	chr19	+	38042272	38078248		GGATTGCGAGGGCTCACCTGAAACTTCATGTACCATTGCACTTCCTGAGAAGCTGTCCCC	natural antisense	NM_016536	ZNF571	zinc finger protein 571	-	38055154	38085673	17.7296	67.437	4.43302	5.66477	14.8547	29.9356	8.39855	76.7259	57.2475	68.3375	4.47743	4.97817	3.84346	5.79475	5.52634	5.67321
ASHGA5P057607	0.00217223	0.0151219	4.6797	down	noncoding	TCONS_00019602	XLOC_009404	LincRNAs identified by Cabili et al	1236	chr11	-	30708955	30718696		AAACTCAACGGGCAAGTAACATGGACATTGATACACCAAGTTCCTTCTTGTTTTTCCTTG	intergenic							5.48351	42.7444	2.75961	4.98603	6.45054	5	5	43.2614	43.3579	41.6138	3.37983	2.40305	2.49594	4.91835	5.10882	4.93091
ASHGA5P044543	0.000902184	0.00923938	2.00052	down	noncoding	ENST00000520457	HPYR1	GENCODE	982	chr8	-	133572744	133573726		TATTTTGGAATTGTCACCACACTATCCTCTGAGCCACCACTCTTCTCGGGAGGTTAAAGT	intergenic							51.5098	159.178	5.97675	6.97712	43.8862	67.9193	42.7238	177.996	158.019	141.518	5.90967	6.02844	5.99214	7.0718	7.09697	6.7626
ASHGA5P040039	0.000411178	0.00623863	2.22075	down	noncoding	ENST00000505408	RP11-724M22.1	GENCODE	489	chr4	+	99417514	99431086		CTGAATCAATGAATCTCACTGAATTTTCCTTCCTCGGCAAATAGGGAAAGGTTTTCCAAG	intronic antisense	NM_005723	TSPAN5	tetraspanin-5	-	99391517	99579812	20.0111	78.2819	4.75632	5.90736	17.5138	24.7834	17.736	75.9463	82.3123	76.587	4.70487	4.7333	4.83078	5.77585	6.10159	5.84465
ASHGA5P023674	0.00855783	0.0350463	3.46885	down	noncoding	HMlincRNA1439+	HMlincRNA1439	LincRNAs identified by Khalil et al	16991	chr8	+	37801630	37818621		GGACTCATCCAAGCTCCAGATTCTGATTTCACCGCTTTATACCGGAGAAGCATTTTCAGT	intergenic							5.01527	31.6455	2.69328	4.48773	5	5	5.04582	27.0076	41.0078	26.921	2.46913	2.40305	3.20766	4.18834	5.02475	4.25011
ASHGA5P039254	0.00143024	0.011813	2.05066	down	noncoding	ENST00000415451	AC091633.3	GENCODE	439	chr3	+	195273418	195274285		GGTCTGAGGACTCCGCTTTCTTCACTGCCCATTCATCTTCATACTGTTCTCATATTTTTT	intergenic							83.0544	237.173	6.5499	7.58598	61.9543	123.966	63.2425	239.719	229.567	242.232	6.35942	6.78354	6.50673	7.52051	7.67189	7.56555
ASHGA5P045466	0.0340137	0.0856588	3.05732	down	noncoding	TCONS_00001990	XLOC_000153	LincRNAs identified by Cabili et al	726	chr1	+	39512711	39514128		TCAAAATACAGCAAAGAGCTCATCATTTCTCAGCTCCTGTCGGAAGCAACAGTGGCTGTT	intergenic							9.69892	45.5982	3.46266	5.07493	9.09458	15.0022	5	39.6925	45.4739	51.6282	3.82244	4.06961	2.49594	4.79037	5.17895	5.25547
ASHGA5P020674	0.00053933	0.00709524	3.26705	down	noncoding	ENST00000518276	RP11-6N13.1	GENCODE	472	chr5	-	104079392	104109361		TTACTTAGAGGTATTACAAAGCTCAAATCTGAGAAAACCTTGTCTACCATCAACCCTGAC	intergenic							5.32723	28.1489	2.61953	4.32751	5	5.98168	5	33.2107	25.2988	25.9372	2.46913	2.89351	2.49594	4.51909	4.27257	4.19087
ASHGA5P038294	0.00261639	0.0168665	2.11659	down	noncoding	ENST00000430831	AC136289.1	pseudogene	1843	chr3	-	63727968	63790769		GCAGCTGGACATACCTATGAAATAATGATTTTAGTATTTTATGACCTACTTCCTTCCCAT								15.4856	57.8746	4.35881	5.44055	14.1651	22.1686	10.123	55.4504	55.8447	62.3287	4.41344	4.57862	4.08436	5.29937	5.48884	5.53344
ASHGA5P014908	0.0245271	0.0687597	2.00227	down	noncoding	ENST00000414659	MCM3AP-AS1	GENCODE	2539	chr21	+	47649144	47671615		GCGCTTTGAGCCTCTAGGCCATGAAACTGCCTCACCAAGCACTATGCAATTGAGTGCCCA	natural antisense	NM_003906	MCM3AP	80 kDa MCM3-associated protein	-	47655047	47705236	13.0602	48.5686	4.17677	5.17841	9.81676	12.9566	16.4072	51.5039	49.7543	44.4477	3.92487	3.88457	4.72086	5.18923	5.31748	5.02851
ASHGA5P049057	0.000154902	0.00398776	3.83058	down	noncoding	ENST00000572017	RP11-876N24.2	GENCODE	575	chr16	-	10958770	10982609		GAAAATATTCCTGATCTTTTTGCCATCAAAAGTCCTTTTTGGGGTTTATTTTCATCCCCA	intronic antisense	NM_000246	CIITA	MHC class II transactivator	+	10971054	11018840	5	29.4779	2.45604	4.3936	5	5	5	34.9202	28.4767	25.0369	2.46913	2.40305	2.49594	4.59688	4.44987	4.13406
ASHGA5P019033	0.00142337	0.0117738	4.02355	down	noncoding	ENST00000465262	RP11-129K20.2	GENCODE	550	chr3	+	62936145	63099387		TACATCAGAGGTCAACGAACTACGGACTCTGCTTACCCTTTGTGAATAAGCCCAGTGAAT	intergenic							5.15729	35.7297	2.69269	4.70115	5.47186	5	5	40.3392	34.1057	32.7443	3.17906	2.40305	2.49594	4.81199	4.7332	4.55827
ASHGA5P022987	0.00133363	0.0114146	2.69714	down	noncoding	ENST00000567158	RP11-21M24.2	GENCODE	611	chr16	+	22386207	22389501		ATTAAACTCACGCTACATAAAACGGTACCCCTAGACCACAAGTTAAGCATCTGGGGACGT	intronic antisense	ENST00000563573	CDR2	cerebellar degeneration-related protein 2, 62kDa [Source:HGNC Symbol;Acc:1799]	-	22360692	22444986	5.01984	22.7215	2.56532	3.99674	5	5.05953	5	21.6662	26.0354	20.4629	2.46913	2.73088	2.49594	3.84346	4.31434	3.83244
ASHGA5P022987	0.00133363	0.0114146	2.69714	down	noncoding	ENST00000567158	RP11-21M24.2	GENCODE	611	chr16	+	22386207	22389501		ATTAAACTCACGCTACATAAAACGGTACCCCTAGACCACAAGTTAAGCATCTGGGGACGT	intronic antisense	ENST00000564542	CDR2	cerebellar degeneration-related protein 2, 62kDa [Source:HGNC Symbol;Acc:1799]	-	22358795	22442917	5.01984	22.7215	2.56532	3.99674	5	5.05953	5	21.6662	26.0354	20.4629	2.46913	2.73088	2.49594	3.84346	4.31434	3.83244
ASHGA5P022987	0.00133363	0.0114146	2.69714	down	noncoding	ENST00000567158	RP11-21M24.2	GENCODE	611	chr16	+	22386207	22389501		ATTAAACTCACGCTACATAAAACGGTACCCCTAGACCACAAGTTAAGCATCTGGGGACGT	natural antisense	ENST00000567406	CDR2	cerebellar degeneration-related protein 2, 62kDa [Source:HGNC Symbol;Acc:1799]	-	22359075	22386411	5.01984	22.7215	2.56532	3.99674	5	5.05953	5	21.6662	26.0354	20.4629	2.46913	2.73088	2.49594	3.84346	4.31434	3.83244
ASHGA5P022695	1.45486e-05	0.00154055	2.7734	down	noncoding	ENST00000561000	RP11-293M10.5	GENCODE	159	chr14	+	75761106	75762843		GGCGCCGCGATGGATGAATGAGCTGTTTCCAGCATTCCTGCTGAATATGAAGGCAACTCG	intergenic							5	21.6441	2.45604	3.92769	5	5	5	21.5924	21.5066	21.8334	2.46913	2.40305	2.49594	3.83783	4.01538	3.92988
ASHGA5P041314	0.0249819	0.06953	2.40181	down	noncoding	ENST00000514186	CTC-504A5.1	GENCODE	564	chr5	+	116751204	116881993		ACTTCTAGGTTAACAATCAGATGCATCTTCACATCCTAATGACCCCAATAAGATTAACTT	intergenic							5.36888	23.2789	2.77021	4.03434	5	5	6.10665	20.93	25.071	23.8356	2.46913	2.40305	3.43846	3.78655	4.25894	4.05753
ASHGA5P034919	0.0143008	0.0484501	2.17607	down	noncoding	ENST00000412424	AC009411.1	GENCODE	548	chr2	-	21861302	21872435		AGCCACAGGGTTCTTTAGAGGCCACTTTCTTCAAGTCTCTAATTTTGCATATGAGAAACA	intergenic							5.26553	20.4317	2.71657	3.83829	5.79658	5	5	20.7722	19.8613	20.6615	3.25071	2.40305	2.49594	3.77535	3.89068	3.84884
ASHGA5P057550	0.00461784	0.0237575	3.2512	down	noncoding	TCONS_00018732	XLOC_008486	LincRNAs identified by Cabili et al	1100	chr10	+	58058948	58073281		TGTCAACTCACTGACTGAATTCAATCCCTGGAGTTCTAAGAGAAATCTCACTCCAAGAAA	intergenic							24.6557	123.758	4.89283	6.5938	14.1229	41.721	18.1231	119.527	118.883	132.864	4.40907	5.40971	4.85972	6.45725	6.65808	6.66608
ASHGA5P042100	0.000337411	0.00566494	2.35089	down	noncoding	ENST00000454588	RP1-45I4.3	GENCODE	552	chr6	-	143360561	143363461		GGTCCAAGTCAATCATCTTTGCTTCTCTCACATTGTCATCGACATTTACCCCAGCATTAT	intergenic							25.0199	100.612	5.05192	6.28512	20.5902	29.9798	24.4896	104.975	94.6138	102.246	4.91225	4.9804	5.26311	6.26553	6.30866	6.28118
ASHGA5P027109	0.00198655	0.0143879	4.86218	down	noncoding	ENST00000545999	RP11-6B19.2	GENCODE	417	chr12	-	15966426	15981208		CTTAGCTTCTGTTCAGCCTAATGTAAGTTCATTCCTTTTGATTACAGTCATTTCAATGAC	intron sense-overlapping	ENST00000535752	EPS8	epidermal growth factor receptor pathway substrate 8 [Source:HGNC Symbol;Acc:3420]	-	15822601	16035263	6.3124	45.1698	2.78705	5.06865	5	8.9372	5	43.8248	47.3419	44.3425	2.46913	3.39608	2.49594	4.93995	5.24088	5.02512
ASHGA5P042801	0.000656147	0.00781921	3.6112	down	noncoding	TCONS_00019908	XLOC_009143	LincRNAs identified by Cabili et al	622	chr11	+	60803036	60807639		AACTTGACCTCTTGTCATCAGAAATCACTGCCAAGTTTCCAAGCCAGGGAAAGAGCAACA	intergenic							5	27.9173	2.45604	4.30852	5	5	5	25.8677	33.188	24.6961	2.46913	2.40305	2.49594	4.12035	4.69018	4.11504
ASHGA5P020641	0.0185805	0.0572156	3.34559	down	noncoding	ENST00000517897	RP11-150O12.2	GENCODE	169	chr8	+	37337606	37338327		CTCACTCTCACCATGTCAACAGGACTTCTATGGAAATATGCGTATGATGAGAAGCAGATC	intergenic							8.6237	46.7892	3.36302	5.10528	9.49352	11.3776	5	57.5167	41.5793	41.2717	3.87793	3.71518	2.49594	5.35119	5.04708	4.91758
ASHGA5P057303	0.00321424	0.0189298	2.50187	down	noncoding	TCONS_00015920	XLOC_007283	LincRNAs identified by Cabili et al	1381	chr9	+	12738518	12770158		AGTCTTACAGGCCTTCTGAAAAGAAGTTCTACTCATCCTTCCAAGCCTATAGAACCAAGG	intergenic							20.9756	92.1693	4.82244	6.14545	24.0578	21.1389	17.7302	105.308	91.0463	80.1536	5.11936	4.51779	4.83017	6.26997	6.25491	5.91146
ASHGA5P033049	0.0285568	0.0761024	2.01507	down	noncoding	ENST00000583224	CTC-304I17.5	GENCODE	803	chr17	+	32488755	32491270		CATTCACATTTGATGACTTCCATAACCCCCATACAAGTAGTTGTGTATTCGTTTTAATTC	intergenic							13.7276	47.4425	4.13143	5.14226	12.9313	21.5406	6.71084	46.565	47.9032	47.8593	4.29172	4.54196	3.56062	5.03175	5.25978	5.13526
ASHGA5P000401	0.0276639	0.0746421	2.22925	down	noncoding	chr3:45182150-45196400-	chr3:45182150-45196400	LincRNAs identified by Khalil et al	14250	chr3	-	45207146	45221396		CCAAGGCCAGCCAGTTATCTTGGGGAGAGAAACTAGGTCATGTTTTCTTCCAAACATCTT	intergenic							6.86686	27.2432	3.12251	4.27907	5	9.63622	5.96438	26.3844	24.3483	30.9969	2.46913	3.48827	3.41015	4.15437	4.21145	4.4714
ASHGA5P049949	0.00023733	0.00475918	2.97784	down	noncoding	ENST00000580378	RP11-945C19.1	GENCODE	346	chr18	+	5762440	5793795		TGTAGATTAAGTAAGTTGTGAAAGTCTGAACCTCTGCCAAAATTTTAAGACCTTGACCTT	intergenic							5	23.3688	2.45604	4.03031	5	5	5	24.8937	18.7386	26.4741	2.46913	2.40305	2.49594	4.06395	3.80224	4.22473
ASHGA5P049305	1.20857e-05	0.00145132	3.15898	down	noncoding	ENST00000561754	RP11-510M2.4	GENCODE	649	chr16	-	71464589	71466068		TTTGGCTTGTTTCCATGGATTTGTTGAGATTTGGGATTTGCAGAACCAAATCTTGATCAG	intergenic							5	24.5735	2.45604	4.1155	5	5	5	27.6337	21.9309	24.1557	2.46913	2.40305	2.49594	4.2262	4.04269	4.07761
ASHGA5P045325	0.0161536	0.0521963	2.49972	down	noncoding	TCONS_00000828	XLOC_000036	LincRNAs identified by Cabili et al	262	chr1	+	5058071	5080898	TCONS_00001932	GTAAGAGTCTTGTTTTACTTCTGCATGGTTTCATACTCACGGGATGTGCTCTACCTGAGG	intergenic							9.33451	45.1537	3.74374	5.06551	9.89699	7.44267	10.6639	42.2913	49.4375	43.7323	3.93705	3.14485	4.14933	4.88335	5.30726	5.00592
ASHGA5P031027	0.00788918	0.0332929	2.088	down	noncoding	ENST00000568410	RP11-101E7.2	GENCODE	405	chr16	-	22097119	22098427		GCTTGAAAATACCAACCCACAGTGTTTTCTTCTCCTGGGAAAAGAACCAAAACTCTTAAA	natural antisense	ENST00000569656	C16orf52	chromosome 16 open reading frame 52 [Source:HGNC Symbol;Acc:27087]	+	22019529	22098854	26.4893	94.9454	5.13287	6.19499	31.0895	25.4143	22.9641	101.889	95.8607	87.0866	5.45112	4.76776	5.17973	6.21969	6.32604	6.03926
ASHGA5P058865	0.000955018	0.00950386	2.32853	down	noncoding	uc.67-	uc.67	UCR	217	chr2	-	104736725	104736942		TCAGGCTTGTCAATCACAATGGGATGTGGGAACTATCTGCCTACTGCATAGGAATTCTTG	intergenic							5	18.5328	2.45604	3.67546	5	5	5	18.2199	20.6329	16.7456	2.46913	2.40305	2.49594	3.5574	3.94897	3.52001
ASHGA5P030116	0.00124636	0.0110219	2.82225	down	noncoding	ENST00000559495	RP11-809H16.4	GENCODE	872	chr15	-	69329888	69335905		TTCTGAAGCTTTTTCTGACCTCCCAAAGACAAAGGGTTTAATACCTCCAGCAACACAGCC	intronic antisense	NM_001184779	NOX5	NADPH oxidase 5 isoform 2	+	69307033	69349501	64.8293	262.85	6.2447	7.74155	43.6697	90.6295	60.1889	288.271	251.357	248.921	5.90193	6.39463	6.43755	7.80579	7.80978	7.60907
ASHGA5P030116	0.00124636	0.0110219	2.82225	down	noncoding	ENST00000559495	RP11-809H16.4	GENCODE	872	chr15	-	69329888	69335905		TTCTGAAGCTTTTTCTGACCTCCCAAAGACAAAGGGTTTAATACCTCCAGCAACACAGCC	intronic antisense	NM_001184780	NOX5	NADPH oxidase 5 isoform 3	+	69222838	69349501	64.8293	262.85	6.2447	7.74155	43.6697	90.6295	60.1889	288.271	251.357	248.921	5.90193	6.39463	6.43755	7.80579	7.80978	7.60907
ASHGA5P030116	0.00124636	0.0110219	2.82225	down	noncoding	ENST00000559495	RP11-809H16.4	GENCODE	872	chr15	-	69329888	69335905		TTCTGAAGCTTTTTCTGACCTCCCAAAGACAAAGGGTTTAATACCTCCAGCAACACAGCC	intronic antisense	NM_024505	NOX5	NADPH oxidase 5 isoform 1	+	69307033	69349501	64.8293	262.85	6.2447	7.74155	43.6697	90.6295	60.1889	288.271	251.357	248.921	5.90193	6.39463	6.43755	7.80579	7.80978	7.60907
ASHGA5P035458	0.00438888	0.0230524	4.37366	down	noncoding	TCONS_00004246	XLOC_002087	LincRNAs identified by Cabili et al	587	chr2	-	46909763	46910666		GAAGGGCCGATACAACTCTCACAACAGTCCAACTCTTTTCTGCCAGATTGGCTTAAAAAA	intergenic							6.63578	42.0346	2.82945	4.95829	5	9.90733	5	39.9663	45.8277	40.3097	2.46913	3.52327	2.49594	4.79971	5.19181	4.88335
ASHGA5P029942	0.00121388	0.0108271	2.66302	down	noncoding	TCONS_00008697	XLOC_004211	LincRNAs identified by Cabili et al	715	chr4	-	186491249	186499648		TAAGAAGATCATCTTGCTGCTACACGGAGCATTTTTTGGCTTCTATTCCAGCCCCTGCAT	intergenic							13.0022	61.3135	4.11953	5.53259	10.2086	19.6018	9.19625	59.263	63.0354	61.6422	3.97822	4.42223	3.95815	5.39822	5.68383	5.51572
ASHGA5P056298	0.00376896	0.020852	2.55407	down	noncoding	TCONS_00001930	XLOC_000036	LincRNAs identified by Cabili et al	223	chr1	+	5058061	5075860	TCONS_00000828, TCONS_00001928	TTGGTCACAGGAACCTGCGTGTTTCAGATAAGATACCTCTTGGATACCTCTTGATTCACT	intergenic							5	20.3866	2.45604	3.80884	5	5	5	22.4176	23.3547	15.3874	2.46913	2.40305	2.49594	3.89563	4.14244	3.38846
ASHGA5P032959	0.000358191	0.00584442	2.08643	down	noncoding	ENST00000582990	RP11-728E14.2	GENCODE	404	chr17	+	21360745	21362301		CTGAGGGCTCTTTCTGTTGTTCTCGCATCTCTCCAGCCACATATTAAAGTGACTCAGACC	intergenic							93.9461	279.719	6.77937	7.84041	86.0462	108.255	87.5368	297.51	259.873	281.775	6.7832	6.61643	6.93848	7.85531	7.85897	7.80694
ASHGA5P026182	0.000243959	0.00479569	4.15626	down	noncoding	BQ217491		LincRNAs identified by Khalil et al	860	chr5	-	171106691	171107536		TATTCTTCACATCAACCTTTGAGAGAGCTTCGGCTGCCACTGTTTTACAGCAGAGGAAAG	intergenic							5	31.9197	2.45604	4.51133	5	5	5	32.5068	24.805	38.4473	2.46913	2.40305	2.49594	4.48457	4.24233	4.80708
ASHGA5P047307	0.00079767	0.00865218	2.27719	down	noncoding	NR_033710	TP73-AS1	RefSeq	5945	chr1	-	3652547	3663937	NR_033711	AGATCTAGTGGATACCATGTATCCTGGAAGATAGGACACTTTCTACCCTCTGTCAGTCCT	natural antisense	NM_001126240	TP73	tumor protein p73 isoform b	+	3607235	3652765	22.2193	86.3713	4.86657	6.05382	16.4896	30.444	19.7242	89.7502	76.8	92.5636	4.61977	5.00162	4.97832	6.0374	5.99362	6.13045
ASHGA5P047307	0.00079767	0.00865218	2.27719	down	noncoding	NR_033710	TP73-AS1	RefSeq	5945	chr1	-	3652547	3663937	NR_033711	AGATCTAGTGGATACCATGTATCCTGGAAGATAGGACACTTTCTACCCTCTGTCAGTCCT	natural antisense	NM_001126241	TP73	tumor protein p73 isoform c	+	3607235	3652765	22.2193	86.3713	4.86657	6.05382	16.4896	30.444	19.7242	89.7502	76.8	92.5636	4.61977	5.00162	4.97832	6.0374	5.99362	6.13045
ASHGA5P047307	0.00079767	0.00865218	2.27719	down	noncoding	NR_033710	TP73-AS1	RefSeq	5945	chr1	-	3652547	3663937	NR_033711	AGATCTAGTGGATACCATGTATCCTGGAAGATAGGACACTTTCTACCCTCTGTCAGTCCT	natural antisense	NM_001126242	TP73	tumor protein p73 isoform d	+	3607235	3652765	22.2193	86.3713	4.86657	6.05382	16.4896	30.444	19.7242	89.7502	76.8	92.5636	4.61977	5.00162	4.97832	6.0374	5.99362	6.13045
ASHGA5P047307	0.00079767	0.00865218	2.27719	down	noncoding	NR_033710	TP73-AS1	RefSeq	5945	chr1	-	3652547	3663937	NR_033711	AGATCTAGTGGATACCATGTATCCTGGAAGATAGGACACTTTCTACCCTCTGTCAGTCCT	natural antisense	NM_001204184	TP73	tumor protein p73 isoform h	+	3569128	3652765	22.2193	86.3713	4.86657	6.05382	16.4896	30.444	19.7242	89.7502	76.8	92.5636	4.61977	5.00162	4.97832	6.0374	5.99362	6.13045
ASHGA5P047307	0.00079767	0.00865218	2.27719	down	noncoding	NR_033710	TP73-AS1	RefSeq	5945	chr1	-	3652547	3663937	NR_033711	AGATCTAGTGGATACCATGTATCCTGGAAGATAGGACACTTTCTACCCTCTGTCAGTCCT	natural antisense	NM_001204185	TP73	tumor protein p73 isoform i	+	3569128	3652765	22.2193	86.3713	4.86657	6.05382	16.4896	30.444	19.7242	89.7502	76.8	92.5636	4.61977	5.00162	4.97832	6.0374	5.99362	6.13045
ASHGA5P047307	0.00079767	0.00865218	2.27719	down	noncoding	NR_033710	TP73-AS1	RefSeq	5945	chr1	-	3652547	3663937	NR_033711	AGATCTAGTGGATACCATGTATCCTGGAAGATAGGACACTTTCTACCCTCTGTCAGTCCT	natural antisense	NM_001204186	TP73	tumor protein p73 isoform j	+	3569128	3652765	22.2193	86.3713	4.86657	6.05382	16.4896	30.444	19.7242	89.7502	76.8	92.5636	4.61977	5.00162	4.97832	6.0374	5.99362	6.13045
ASHGA5P047307	0.00079767	0.00865218	2.27719	down	noncoding	NR_033710	TP73-AS1	RefSeq	5945	chr1	-	3652547	3663937	NR_033711	AGATCTAGTGGATACCATGTATCCTGGAAGATAGGACACTTTCTACCCTCTGTCAGTCCT	natural antisense	NM_001204187	TP73	tumor protein p73 isoform k	+	3569128	3652765	22.2193	86.3713	4.86657	6.05382	16.4896	30.444	19.7242	89.7502	76.8	92.5636	4.61977	5.00162	4.97832	6.0374	5.99362	6.13045
ASHGA5P047307	0.00079767	0.00865218	2.27719	down	noncoding	NR_033710	TP73-AS1	RefSeq	5945	chr1	-	3652547	3663937	NR_033711	AGATCTAGTGGATACCATGTATCCTGGAAGATAGGACACTTTCTACCCTCTGTCAGTCCT	natural antisense	NM_001204188	TP73	tumor protein p73 isoform l	+	3569128	3652765	22.2193	86.3713	4.86657	6.05382	16.4896	30.444	19.7242	89.7502	76.8	92.5636	4.61977	5.00162	4.97832	6.0374	5.99362	6.13045
ASHGA5P047307	0.00079767	0.00865218	2.27719	down	noncoding	NR_033710	TP73-AS1	RefSeq	5945	chr1	-	3652547	3663937	NR_033711	AGATCTAGTGGATACCATGTATCCTGGAAGATAGGACACTTTCTACCCTCTGTCAGTCCT	natural antisense	NM_001204189	TP73	tumor protein p73 isoform e	+	3607235	3652765	22.2193	86.3713	4.86657	6.05382	16.4896	30.444	19.7242	89.7502	76.8	92.5636	4.61977	5.00162	4.97832	6.0374	5.99362	6.13045
ASHGA5P047307	0.00079767	0.00865218	2.27719	down	noncoding	NR_033710	TP73-AS1	RefSeq	5945	chr1	-	3652547	3663937	NR_033711	AGATCTAGTGGATACCATGTATCCTGGAAGATAGGACACTTTCTACCCTCTGTCAGTCCT	natural antisense	NM_001204190	TP73	tumor protein p73 isoform f	+	3607235	3652765	22.2193	86.3713	4.86657	6.05382	16.4896	30.444	19.7242	89.7502	76.8	92.5636	4.61977	5.00162	4.97832	6.0374	5.99362	6.13045
ASHGA5P047307	0.00079767	0.00865218	2.27719	down	noncoding	NR_033710	TP73-AS1	RefSeq	5945	chr1	-	3652547	3663937	NR_033711	AGATCTAGTGGATACCATGTATCCTGGAAGATAGGACACTTTCTACCCTCTGTCAGTCCT	natural antisense	NM_001204191	TP73	tumor protein p73 isoform g	+	3607235	3652765	22.2193	86.3713	4.86657	6.05382	16.4896	30.444	19.7242	89.7502	76.8	92.5636	4.61977	5.00162	4.97832	6.0374	5.99362	6.13045
ASHGA5P047307	0.00079767	0.00865218	2.27719	down	noncoding	NR_033710	TP73-AS1	RefSeq	5945	chr1	-	3652547	3663937	NR_033711	AGATCTAGTGGATACCATGTATCCTGGAAGATAGGACACTTTCTACCCTCTGTCAGTCCT	natural antisense	NM_001204192	TP73	tumor protein p73 isoform m	+	3614609	3652765	22.2193	86.3713	4.86657	6.05382	16.4896	30.444	19.7242	89.7502	76.8	92.5636	4.61977	5.00162	4.97832	6.0374	5.99362	6.13045
ASHGA5P047307	0.00079767	0.00865218	2.27719	down	noncoding	NR_033710	TP73-AS1	RefSeq	5945	chr1	-	3652547	3663937	NR_033711	AGATCTAGTGGATACCATGTATCCTGGAAGATAGGACACTTTCTACCCTCTGTCAGTCCT	natural antisense	NM_005427	TP73	tumor protein p73 isoform a	+	3569128	3652765	22.2193	86.3713	4.86657	6.05382	16.4896	30.444	19.7242	89.7502	76.8	92.5636	4.61977	5.00162	4.97832	6.0374	5.99362	6.13045
ASHGA5P028846	0.00507409	0.0251774	2.76542	down	noncoding	ENST00000414201	RP11-196P2.1	GENCODE	403	chr13	+	61491175	61492139	uc001vic.1	ATCTTAGGTCTCTTTCTCATATTTTCCTCCAATCTCTACTGCTGGGAAGGCGAGGGACAT	intergenic							36.2755	154.724	5.47234	6.93984	21.3534	50.9804	36.4926	156.571	150.249	157.351	4.95889	5.65868	5.79945	6.88043	7.02008	6.91902
ASHGA5P047576	0.00129336	0.0112371	4.71824	down	noncoding	ENST00000437930	RP11-399O19.5	GENCODE	2043	chr10	+	90692440	90699731		CCTGTAGAGATGACAGCAATGGTTGGTGATTTCTGCCTCAATTATGAAAGTGATCTGGTG	natural antisense	NM_001141945	ACTA2	actin, aortic smooth muscle	-	90694830	90751147	6.14258	43.0252	2.75859	4.99684	5	8.42774	5	44.0243	41.9468	43.1045	2.46913	3.31071	2.49594	4.94759	5.05818	4.98476
ASHGA5P047576	0.00129336	0.0112371	4.71824	down	noncoding	ENST00000437930	RP11-399O19.5	GENCODE	2043	chr10	+	90692440	90699731		CCTGTAGAGATGACAGCAATGGTTGGTGATTTCTGCCTCAATTATGAAAGTGATCTGGTG	natural antisense	NM_001613	ACTA2	actin, aortic smooth muscle	-	90694830	90712580	6.14258	43.0252	2.75859	4.99684	5	8.42774	5	44.0243	41.9468	43.1045	2.46913	3.31071	2.49594	4.94759	5.05818	4.98476
ASHGA5P058792	0.00467166	0.0239033	4.12755	down	noncoding	uc.476-	uc.476	UCR	238	chrX	-	81789598	81789836		GGGCCTAATTTTGCCACTGTTAGCTTCCACTTTTGTCATCAGTTGTAATTTATAGTTGAG	intergenic							11.2238	74.6099	3.78921	5.8345	7.33978	20.719	5.6127	76.5934	73.3853	73.851	3.5395	4.49125	3.33688	5.79181	5.9231	5.78858
ASHGA5P055676	0.00058191	0.00740333	2.94906	down	noncoding	TCONS_00004809	XLOC_001515	LincRNAs identified by Cabili et al	386	chr2	+	67791559	67792282		TAGTCTGAAAGGTACAAATCAGAACTTTCACCACATTCCATCTGGCACTCACTGGTGGTG	intergenic							11.0231	59.6155	3.92839	5.48864	7.92528	15.4629	9.68111	59.0058	60.2293	59.6115	3.64508	4.11314	4.02695	5.39139	5.60942	5.46511
ASHGA5P000189	0.00151522	0.0122198	2.55135	down	noncoding	chr10:113880000-113890875-	chr10:113880000-113890875	LincRNAs identified by Khalil et al	10875	chr10	-	113890010	113900885		AAGTCCATTTTCACAGCCTTCTTCCAGTACAGAGCTCTGAACTACCAACAGACGAGAGTT	intergenic							17.7831	81.3645	4.6162	5.96746	17.9042	17.817	17.628	82.2607	82.1883	79.6445	4.73084	4.29624	4.82153	5.89978	6.09939	5.90322
ASHGA5P015622	0.000147756	0.00393763	3.25905	down	noncoding	ENST00000422023	RP11-242F11.2	GENCODE	446	chr6	-	148338557	148342110		AGTTTTCAAGTTTAATTCAAGTGCATCTACCTCTTCTCCACTGTTGACACCAGAAAACTC	intergenic							43.34	216.438	5.74565	7.4501	44.2409	55.9918	29.7873	227.354	208.823	213.138	5.91818	5.78324	5.53552	7.44512	7.5319	7.37327
ASHGA5P057288	0.000515974	0.00696476	2.93082	down	noncoding	TCONS_00015398	XLOC_006991	LincRNAs identified by Cabili et al	667	chr8	-	7333625	7335170		AAGTTGTCGAAGTCACCAGACAAGGTTTTGCTGTATTGCCTACTACACTGGAGTGCAGTA	intergenic							5	22.927	2.45604	4.00735	5	5	5	20.0162	24.0982	24.6667	2.46913	2.40305	2.49594	3.71275	4.19592	4.11338
ASHGA5P051826	0.00629752	0.0288695	2.21352	down	noncoding	uc003fto.1	AK091265	UCSC_knowngene	1549	chr3	-	193559838	193561813		TTAGGAGAGGGAAGTCCTGCATATTTCATGCTGTGACTTCTTGCTTCCAAACTGCGTATG	intergenic							5	17.9088	2.45604	3.60238	5	5	5	22.4942	17.8797	13.3526	2.46913	2.40305	2.49594	3.9014	3.72434	3.18141
ASHGA5P036567	0.0107952	0.040503	2.08245	down	noncoding	ENST00000429293	RP5-997D16.2	GENCODE	720	chr1	+	35316294	35317156		TAGGTTCTTCCTGCAATACAATTAAAGCTGCTAACATTTACTGAGTACCTACTGGTTGTT	natural antisense	NM_001164824	C1orf212	UPF0767 protein C1orf212	-	35315962	35324646	8.323	35.0142	3.60925	4.66753	8.23767	7.99465	8.73668	37.5911	37.3287	30.1227	3.69502	3.23817	3.89457	4.70364	4.87635	4.42263
ASHGA5P036567	0.0107952	0.040503	2.08245	down	noncoding	ENST00000429293	RP5-997D16.2	GENCODE	720	chr1	+	35316294	35317156		TAGGTTCTTCCTGCAATACAATTAAAGCTGCTAACATTTACTGAGTACCTACTGGTTGTT	natural antisense	NM_001164825	C1orf212	UPF0767 protein C1orf212	-	35315962	35325338	8.323	35.0142	3.60925	4.66753	8.23767	7.99465	8.73668	37.5911	37.3287	30.1227	3.69502	3.23817	3.89457	4.70364	4.87635	4.42263
ASHGA5P036567	0.0107952	0.040503	2.08245	down	noncoding	ENST00000429293	RP5-997D16.2	GENCODE	720	chr1	+	35316294	35317156		TAGGTTCTTCCTGCAATACAATTAAAGCTGCTAACATTTACTGAGTACCTACTGGTTGTT	natural antisense	NM_138428	C1orf212	UPF0767 protein C1orf212	-	35315962	35325417	8.323	35.0142	3.60925	4.66753	8.23767	7.99465	8.73668	37.5911	37.3287	30.1227	3.69502	3.23817	3.89457	4.70364	4.87635	4.42263
ASHGA5P054526	0.000861184	0.00902616	2.6819	down	noncoding	uc001kfm.3	BC069782	UCSC_knowngene	1227	chr10	+	90667927	90669154		TATTATGAAGGTATTGTGGGTTTTCTTCTCCACTGTGGAATCAAATGCTCCATAAGTATC	exon sense-overlapping	NM_020799	STAMBPL1	AMSH-like protease	+	90639943	90683259	14.162	67.4909	4.2534	5.67665	13.889	19.2293	9.36761	71.43	68.4978	62.5451	4.38631	4.39723	3.97665	5.68018	5.81032	5.53946
ASHGA5P027310	0.00134129	0.0114353	2.05949	down	noncoding	CN282981		LincRNAs identified by Khalil et al	677	chr1	+	157381994	157382669		AGAGTAGTTGGAGGAGGTTCTATGGGCTTTGGGTACTCTGTCAAATCATACATGGTTGCT	intergenic							16.95	63.3733	4.53234	5.57462	18.732	19.3593	12.7586	68.116	57.4594	64.5446	4.78978	4.406	4.40124	5.60873	5.53134	5.58381
ASHGA5P040618	0.0126894	0.044834	2.95914	down	noncoding	uc003kqq.1	AK097686	UCSC_knowngene	544	chr5	-	113783114	113805508		CAGGACATCTTCTTAAATTCTACCTCTGTTAAACTATACTTCCCAAACAAGAACCTATCA	intronic antisense	NM_021614	KCNN2	small conductance calcium-activated potassium channel protein 2 isoform a	+	113698015	113832197	6.59802	29.1934	2.82416	4.38934	5	9.79407	5	28.4219	32.1651	26.9931	2.46913	3.50741	2.49594	4.27267	4.64203	4.25331
ASHGA5P040618	0.0126894	0.044834	2.95914	down	noncoding	uc003kqq.1	AK097686	UCSC_knowngene	544	chr5	-	113783114	113805508		CAGGACATCTTCTTAAATTCTACCTCTGTTAAACTATACTTCCCAAACAAGAACCTATCA	intronic antisense	NM_170775	KCNN2	small conductance calcium-activated potassium channel protein 2 isoform b	+	113769226	113832197	6.59802	29.1934	2.82416	4.38934	5	9.79407	5	28.4219	32.1651	26.9931	2.46913	3.50741	2.49594	4.27267	4.64203	4.25331
ASHGA5P038387	7.06508e-05	0.00289272	2.32081	down	noncoding	TCONS_00014873	XLOC_006941	LincRNAs identified by Cabili et al	889	chr8	+	141474980	141476603	TCONS_00014872	ACGTCACAAGTCTCATGCGTTTCTCCACCTACGTTTTGCACATGTGCACACATTTATTGA	intergenic							27.1217	105.763	5.14467	6.3593	23.6342	35.2661	22.4648	103.439	105.657	108.192	5.09413	5.18787	5.15201	6.24353	6.47263	6.36173
ASHGA5P047725	0.0247797	0.0692308	3.9888	down	noncoding	ENST00000549104	CTA-109P11.4	GENCODE	526	chr10	+	119184704	119249930		CCATCCTCATTTTCTGGAGAGGCAGCGTGACCTAACGACGAAAGCCTCCACAACTGGTTT	intergenic							6.83195	47.7829	3.1102	5.10615	5	5.35214	10.1437	58.6711	52.1742	32.5032	2.46913	2.77467	4.08679	5.3822	5.38879	4.54746
ASHGA5P031381	0.000302917	0.00531659	5.79099	down	noncoding	uc002fjs.3	BC041439	UCSC_knowngene	515	chr16	-	86754289	86755565	TCONS_00025088	CTGCTACTTTCAAACAAGGGTCCCATTTTTAATGTTTTCCCAGTAATACCTTATGAATGT	intergenic							5.58559	49.3274	2.66455	5.19836	5	6.75678	5	47.3812	53.6039	46.9971	2.46913	3.02859	2.49594	5.05743	5.42914	5.10852
ASHGA5P019510	0.0206458	0.0613547	2.60667	down	noncoding	NR_024276	LINC00635	RefSeq	1203	chr3	-	107560508	107596915		ACAGGAAAATAATCACATCCTTCCTGAGATAATGAGCACACAATTGCCTGGATACCTGAA	intergenic							6.72922	26.296	2.8443	4.22651	5	10.1877	5	28.8719	26.3037	23.7124	2.46913	3.56783	2.49594	4.29846	4.3306	4.05046
ASHGA5P055528	0.000507475	0.00690618	2.81699	down	noncoding	ENST00000549359	RP11-588H23.3	GENCODE	572	chr12	+	70861902	70921529		GGAAACTTGTGAAGACCTGCATCCCTTTGTATCTCAAATAAAGACAGAGGTAAGTTGAAG	natural antisense	NM_001109754	PTPRB	receptor-type tyrosine-protein phosphatase beta isoform a	-	70910631	71031220	17.3091	83.4212	4.5064	6.00055	13.8414	25.7667	12.3191	91.322	78.1461	80.7955	4.38074	4.78521	4.35325	6.06032	6.01935	5.92199
ASHGA5P055528	0.000507475	0.00690618	2.81699	down	noncoding	ENST00000549359	RP11-588H23.3	GENCODE	572	chr12	+	70861902	70921529		GGAAACTTGTGAAGACCTGCATCCCTTTGTATCTCAAATAAAGACAGAGGTAAGTTGAAG	natural antisense	NM_001206971	PTPRB	receptor-type tyrosine-protein phosphatase beta isoform c precursor	-	70910631	71003624	17.3091	83.4212	4.5064	6.00055	13.8414	25.7667	12.3191	91.322	78.1461	80.7955	4.38074	4.78521	4.35325	6.06032	6.01935	5.92199
ASHGA5P055528	0.000507475	0.00690618	2.81699	down	noncoding	ENST00000549359	RP11-588H23.3	GENCODE	572	chr12	+	70861902	70921529		GGAAACTTGTGAAGACCTGCATCCCTTTGTATCTCAAATAAAGACAGAGGTAAGTTGAAG	natural antisense	NM_001206972	PTPRB	receptor-type tyrosine-protein phosphatase beta isoform d precursor	-	70910631	71003624	17.3091	83.4212	4.5064	6.00055	13.8414	25.7667	12.3191	91.322	78.1461	80.7955	4.38074	4.78521	4.35325	6.06032	6.01935	5.92199
ASHGA5P055528	0.000507475	0.00690618	2.81699	down	noncoding	ENST00000549359	RP11-588H23.3	GENCODE	572	chr12	+	70861902	70921529		GGAAACTTGTGAAGACCTGCATCCCTTTGTATCTCAAATAAAGACAGAGGTAAGTTGAAG	natural antisense	NM_002837	PTPRB	receptor-type tyrosine-protein phosphatase beta isoform b precursor	-	70910631	71003624	17.3091	83.4212	4.5064	6.00055	13.8414	25.7667	12.3191	91.322	78.1461	80.7955	4.38074	4.78521	4.35325	6.06032	6.01935	5.92199
ASHGA5P016558	0.00387092	0.0211702	3.21845	down	noncoding	ENST00000431669	NPSR1-AS1	GENCODE	369	chr7	-	34682838	34911194		AAGAAAACAAGTTTAGGAAAACTTCCTACACCTTCTTTGTTGGGATGTTCTCTGGACTAA	intronic antisense	NM_207172	NPSR1	neuropeptide S receptor isoform A	+	34697896	34889590	6.3345	35.663	3.01277	4.69914	6.3874	7.6161	5	40.033	35.1738	31.7821	3.36879	3.17359	2.49594	4.80158	4.78529	4.51056
ASHGA5P016558	0.00387092	0.0211702	3.21845	down	noncoding	ENST00000431669	NPSR1-AS1	GENCODE	369	chr7	-	34682838	34911194		AAGAAAACAAGTTTAGGAAAACTTCCTACACCTTCTTTGTTGGGATGTTCTCTGGACTAA	intronic antisense	NM_207173	NPSR1	neuropeptide S receptor isoform B	+	34697896	34917944	6.3345	35.663	3.01277	4.69914	6.3874	7.6161	5	40.033	35.1738	31.7821	3.36879	3.17359	2.49594	4.80158	4.78529	4.51056
ASHGA5P015034	0.0061529	0.0284382	2.29019	down	noncoding	ENST00000415872	RP11-262H14.3	GENCODE	397	chr9	-	66523962	66533431		GGTCATCTGATGGTTGTAACCTCCAGCTTTCCCAGGAAATATGAGAAGACATGGAAAAAA	intergenic							20.3866	78.919	4.72053	5.916	21.4337	27.6932	12.033	88.2561	78.6417	69.8592	4.96345	4.87678	4.32136	6.01147	6.02742	5.7091
ASHGA5P054404	0.0237595	0.0673071	3.98878	down	noncoding	TCONS_00010945	XLOC_004859	LincRNAs identified by Cabili et al	387	chr5	-	67804064	67814933		ATGTTGGCTTCATCCTCATGCCGGTAGCAAGATGGCTACAGAAGTTCTGGAAATATACCA	intergenic							9.13546	58.1419	3.4547	5.45065	5	9.85347	12.5529	58.1663	62.0493	54.2099	2.46913	3.51568	4.37929	5.36928	5.65693	5.32573
ASHGA5P036864	0.00379418	0.0209542	2.63587	down	noncoding	ENST00000441270	RP1-309F20.3	GENCODE	927	chr20	-	57438582	57463881		TTTTCCTTCCCATTATCAACTCATTAAAGGAAGTTAAAAGTACTTACTCTGTCCCACACA	intronic antisense	NM_001077490	GNAS	protein ALEX alex	+	57428035	57486250	78.4475	293.741	6.51342	7.91169	53.2404	97.4475	84.6546	276.31	288.432	316.48	6.15616	6.48612	6.89797	7.7384	8.01408	7.9826
ASHGA5P036864	0.00379418	0.0209542	2.63587	down	noncoding	ENST00000441270	RP1-309F20.3	GENCODE	927	chr20	-	57438582	57463881		TTTTCCTTCCCATTATCAACTCATTAAAGGAAGTTAAAAGTACTTACTCTGTCCCACACA	intronic antisense	NM_016592	GNAS	protein ALEX NESP55	+	57414794	57486250	78.4475	293.741	6.51342	7.91169	53.2404	97.4475	84.6546	276.31	288.432	316.48	6.15616	6.48612	6.89797	7.7384	8.01408	7.9826
ASHGA5P036864	0.00379418	0.0209542	2.63587	down	noncoding	ENST00000441270	RP1-309F20.3	GENCODE	927	chr20	-	57438582	57463881		TTTTCCTTCCCATTATCAACTCATTAAAGGAAGTTAAAAGTACTTACTCTGTCCCACACA	intronic antisense	NM_080425	GNAS	protein ALEX XLas	+	57428035	57486250	78.4475	293.741	6.51342	7.91169	53.2404	97.4475	84.6546	276.31	288.432	316.48	6.15616	6.48612	6.89797	7.7384	8.01408	7.9826
ASHGA5P047286	6.95261e-05	0.00287054	3.03262	down	noncoding	ENST00000564681	RP11-108B14.5	GENCODE	3095	chr10	+	22507002	22510097		ATAAAAATGACCATATTCTGCCTCATTTCTGGATCCGAGCCACTACTCCGGCTAGGAACT	intergenic							14.4995	78.4043	4.30913	5.9097	13.3776	18.9586	11.1623	82.5625	79.6006	73.0499	4.33424	4.38171	4.21145	5.90848	6.04721	5.77341
ASHGA5P029759	0.000461401	0.00660861	2.66668	down	noncoding	ENST00000556212	RP11-638I2.9	GENCODE	552	chr14	+	100806168	100806891		TCCCCAACAACCCAATGACCTCTGTAGTGATGTCTCTATCTTACAGGTGAAGGAAATCAG	intronic antisense	NM_004184	WARS	tryptophan--tRNA ligase, cytoplasmic isoform a	-	100800124	100841927	11.212	55.6303	3.96875	5.38379	10.3785	14.7738	8.48365	51.9756	60.3825	54.5328	3.99796	4.05209	3.8562	5.20347	5.6141	5.33381
ASHGA5P029759	0.000461401	0.00660861	2.66668	down	noncoding	ENST00000556212	RP11-638I2.9	GENCODE	552	chr14	+	100806168	100806891		TCCCCAACAACCCAATGACCTCTGTAGTGATGTCTCTATCTTACAGGTGAAGGAAATCAG	intronic antisense	NM_173701	WARS	tryptophan--tRNA ligase, cytoplasmic isoform a	-	100800124	100842680	11.212	55.6303	3.96875	5.38379	10.3785	14.7738	8.48365	51.9756	60.3825	54.5328	3.99796	4.05209	3.8562	5.20347	5.6141	5.33381
ASHGA5P029759	0.000461401	0.00660861	2.66668	down	noncoding	ENST00000556212	RP11-638I2.9	GENCODE	552	chr14	+	100806168	100806891		TCCCCAACAACCCAATGACCTCTGTAGTGATGTCTCTATCTTACAGGTGAAGGAAATCAG	intronic antisense	NM_213645	WARS	tryptophan--tRNA ligase, cytoplasmic isoform b	-	100800124	100842680	11.212	55.6303	3.96875	5.38379	10.3785	14.7738	8.48365	51.9756	60.3825	54.5328	3.99796	4.05209	3.8562	5.20347	5.6141	5.33381
ASHGA5P029759	0.000461401	0.00660861	2.66668	down	noncoding	ENST00000556212	RP11-638I2.9	GENCODE	552	chr14	+	100806168	100806891		TCCCCAACAACCCAATGACCTCTGTAGTGATGTCTCTATCTTACAGGTGAAGGAAATCAG	intronic antisense	NM_213646	WARS	tryptophan--tRNA ligase, cytoplasmic isoform b	-	100800124	100841927	11.212	55.6303	3.96875	5.38379	10.3785	14.7738	8.48365	51.9756	60.3825	54.5328	3.99796	4.05209	3.8562	5.20347	5.6141	5.33381
ASHGA5P026593	0.00136396	0.0115386	2.25299	down	noncoding	ENST00000529369	RP11-660L16.2	GENCODE	680	chr11	+	71159719	71163203		GTTTCCCCCTCGGCAAATGGGGCTTCAGCGGCTCGCGACGCACATTGATGGAGCGTATGT	intronic antisense	ENST00000527452	DHCR7	7-dehydrocholesterol reductase [Source:HGNC Symbol;Acc:2860]	-	71155086	71163914	159.681	476.15	7.4704	8.64224	162.555	178.807	137.681	522.366	478.174	427.908	7.62883	7.25787	7.52451	8.7168	8.76187	8.44806
ASHGA5P058679	0.0124558	0.0443748	4.03956	down	noncoding	uc.198-	uc.198	UCR	307	chr6	-	98719888	98720195		TCAGGACATTTTTTAAAACTACCCCATCAGCTTTCTTGTATTCAATGCACTATCATAGCA	intergenic							9.2182	57.851	3.42392	5.43811	9.3745	13.2801	5	64.4274	52.8006	56.3249	3.85985	3.91595	2.49594	5.52481	5.40705	5.38248
ASHGA5P029751	0.00163303	0.0127876	2.39292	down	noncoding	ENST00000557072	RP11-61O1.2	GENCODE	374	chr14	+	98602410	98605579		GTTACTTACTACCATGTGAATCTGACCATCAAAATTCTTCCTACATTTCAATTCCCCCAA	intergenic							11.4817	51.9845	4.02457	5.28334	9.33645	12.8168	12.2918	52.7285	50.5981	52.6267	3.85386	3.87013	4.34973	5.22274	5.34276	5.28453
ASHGA5P023830	1.7198e-06	0.000868385	2.90646	down	noncoding	HMlincRNA561+	HMlincRNA561	LincRNAs identified by Khalil et al	2536	chr8	+	131684814	131687350		CATATCTGGCTGTATCCGTGAAAAACATATTTTACACCAGGCTCTATTCAGGTTGGTTCC	intergenic							5	22.6811	2.45604	3.9953	5	5	5	24.4705	20.7097	22.8629	2.46913	2.40305	2.49594	4.03298	3.95497	3.99796
ASHGA5P034233	0.0255996	0.07066	2.40725	down	noncoding	uc002oxo.1	AK131520	UCSC_knowngene	2066	chr19	-	44326208	44331358		CCATGGGCTACAGGGATCTTTTCTGTTATTGCACTTGTTCTATATTCATATTTCATGTAA	bidirectional	NM_181845	ZNF283	zinc finger protein 283	+	44331472	44353050	7.38612	30.2762	3.17946	4.44685	7	10.1584	5	30.7106	33.1021	27.0159	3.479	3.56345	2.49594	4.39866	4.68644	4.25545
ASHGA5P046417	0.0101578	0.0389502	2.23658	down	noncoding	TCONS_00001392	XLOC_000709	LincRNAs identified by Cabili et al	288	chr1	-	14609148	14630936		TTCTGACATTAGCATCTATTATCTTCCTGGCTGAATTCTTCCCTAAAGGGCGCTCGGCAT	intergenic							29.6342	107.579	5.22575	6.38704	18.152	40.3137	30.4369	107.969	108.002	106.766	4.74831	5.36403	5.56491	6.30662	6.50908	6.34543
ASHGA5P035073	0.00013934	0.00380712	3.04435	down	noncoding	ENST00000420724	AC007389.3	GENCODE	1656	chr2	-	65816699	65867311		TCTGATGCCACCAGACTTAAAGCAGTTCACGATCCTCTCTACAAAGAAGTATATTTAGGT	intergenic							7.39924	45.0036	3.45459	5.06073	7.42158	7.97241	6.80374	46.3585	42.2779	46.3742	3.55317	3.23347	3.57715	5.0244	5.06909	5.0887
ASHGA5P028549	0.000164542	0.00408636	4.95695	down	noncoding	TCONS_00009849	XLOC_004261	LincRNAs identified by Cabili et al	390	chr5	+	3345497	3346444		TATCCTTCTGTATAATCAGTCTTTCTGCATTGGTTTGCAAGGACTCAGCCACTGCACACC	intergenic							5.19812	40.587	2.59296	4.90242	5	5.59435	5	37.8987	44.4935	39.3688	2.46913	2.81382	2.49594	4.71671	5.14577	4.84476
ASHGA5P039104	0.00961505	0.0376085	2.40013	down	noncoding	ENST00000498457	RP11-292E2.1	GENCODE	634	chr3	+	153074895	153091975	TCONS_00007010	TGGCTTTTACTTTCTCAATTTTCCAGAGCTCATACTCCTCAAACTCCAGAGGAATAAGAT	intergenic							9.49761	42.1395	3.68972	4.95283	6.14404	14.9393	7.40948	35.6861	44.9288	45.8035	3.32	4.06439	3.68477	4.62564	5.16015	5.07269
ASHGA5P027633	0.00282586	0.017556	4.60137	down	noncoding	TCONS_00012182	XLOC_005737	LincRNAs identified by Cabili et al	2168	chr6	-	45533739	45544785		GTCTTCTGTGACGTATCAAAAGGGCATTGTTGATGCTCTCATTTCCACCATTTGATACCA	intronic antisense	ENST00000576263	RUNX2	runt-related transcription factor 2 [Source:HGNC Symbol;Acc:10472]	+	45296463	45632086	5.15152	41.3577	2.7242	4.92627	5	5	5.45456	34.8179	45.2503	44.005	2.46913	2.40305	3.30043	4.59201	5.17251	5.01428
ASHGA5P030050	0.0130031	0.0454695	2.2736	down	noncoding	ENST00000558866	RP11-643A5.2	GENCODE	793	chr15	-	54239820	54267147		GAGCTGCGGTGACAAGATCGAACGGACACAGATGACCCTTTCAAAAAATAAAAAGAGCTC	intergenic							5.98635	21.5439	2.73216	3.91714	5	7.95906	5	21.6087	23.5252	19.4978	2.46913	3.2314	2.49594	3.83914	4.15595	3.75633
ASHGA5P056561	0.0144929	0.048799	2.53988	down	noncoding	TCONS_00006125	XLOC_002727	LincRNAs identified by Cabili et al	3270	chr3	+	88387590	88517304		TCAGCAGCTAGAGTGTGGTGGCATTATTTACTCAGGAGAAAAAAGTATAGGAAACTAAAG	intergenic							6.69408	29.9068	3.07648	4.42124	7.23488	7.84737	5	28.3472	26.5519	34.8211	3.52054	3.21294	2.49594	4.26786	4.34305	4.6528
ASHGA5P040660	0.000592564	0.00746161	2.01862	down	noncoding	uc003kuo.3	FLJ33630	UCSC_knowngene	1873	chr5	-	127276131	127419299	uc003kuq.1	TTTTTCCCCCCGCTTTGGTGAACTCGCAGTACTTGGGCTGAGCCCGAAATCTCGCGAGAT	bidirectional	NM_001046	SLC12A2	solute carrier family 12 member 2 isoform 1	+	127419482	127525380	215.083	549.918	7.85053	8.8639	201.24	245.826	198.184	603.418	508.888	537.448	7.88958	7.66836	7.99363	8.93179	8.85465	8.80524
ASHGA5P040660	0.000592564	0.00746161	2.01862	down	noncoding	uc003kuo.3	FLJ33630	UCSC_knowngene	1873	chr5	-	127276131	127419299	uc003kuq.1	TTTTTCCCCCCGCTTTGGTGAACTCGCAGTACTTGGGCTGAGCCCGAAATCTCGCGAGAT	bidirectional	NM_001256461	SLC12A2	solute carrier family 12 member 2 isoform 2	+	127419482	127525380	215.083	549.918	7.85053	8.8639	201.24	245.826	198.184	603.418	508.888	537.448	7.88958	7.66836	7.99363	8.93179	8.85465	8.80524
ASHGA5P033195	0.0120252	0.0434767	2.7265	down	noncoding	ENST00000502823	RP11-1079K10.3	GENCODE	545	chr17	+	47438526	47443477	ENST00000507337	CTAACTTTTATTCATTAAGGCAGTGGGCAGAAAGCAGCAGAACCCTGTTTTTTCTTTTTT	intronic antisense	NM_001145365	ZNF652	zinc finger protein 652	-	47366567	47439476	6.40205	26.6761	2.79901	4.24606	5	9.20615	5	30.4751	25.7605	23.7927	2.46913	3.43195	2.49594	4.3845	4.2987	4.05498
ASHGA5P033195	0.0120252	0.0434767	2.7265	down	noncoding	ENST00000502823	RP11-1079K10.3	GENCODE	545	chr17	+	47438526	47443477	ENST00000507337	CTAACTTTTATTCATTAAGGCAGTGGGCAGAAAGCAGCAGAACCCTGTTTTTTCTTTTTT	intronic antisense	NM_014897	ZNF652	zinc finger protein 652	-	47366567	47439835	6.40205	26.6761	2.79901	4.24606	5	9.20615	5	30.4751	25.7605	23.7927	2.46913	3.43195	2.49594	4.3845	4.2987	4.05498
ASHGA5P017162	0.0018139	0.0135678	2.03116	down	noncoding	ENST00000438401	RP5-845O24.8	GENCODE	378	chr1	-	12882548	12883022	ENST00000432559, ENST00000437631	TGGGACCTTGAAGTCCCAGCATTTTTCATCTTTCAATCTCACCTCCTTTTCCTGATAATA	intergenic							1255.99	2926.45	10.2663	11.2886	1010.84	1596.42	1160.73	3061	2480.05	3238.3	10.0843	10.2773	10.4374	11.2948	11.1226	11.4485
ASHGA5P033471	0.00901901	0.0362639	4.35918	down	noncoding	ENST00000564872	RP11-672L10.1	GENCODE	861	chr18	-	926083	927994		CAGGAATTTACAGTTCACAGAGCACTTTTTCATCTCCTTAAAATCTCATAAAATCGCAGT	intergenic							12.4929	81.702	3.84997	5.97402	6.56426	24.9897	5.92473	86.0905	77.6531	81.3624	3.4028	4.74458	3.40252	5.97634	6.01114	5.93459
ASHGA5P032740	0.000207466	0.00448913	4.32046	down	noncoding	ENST00000571282	RP5-1029F21.3	GENCODE	493	chr17	+	406410	414587		ACACCTGGGGAAACCTGGAAATCTTCAGTGATGTTTTGGTGGAGTGAGAACCTCTACAAA	natural antisense	NM_001128159	VPS53	vacuolar protein sorting-associated protein 53 homolog isoform 1	-	411907	618096	5	33.1167	2.45604	4.56723	5	5	5	40.6217	31.5015	27.227	2.46913	2.40305	2.49594	4.82254	4.60992	4.26921
ASHGA5P042419	0.000632221	0.00770887	4.6859	down	noncoding	ENST00000570443	RP1-153P14.8	GENCODE	537	chr6	+	37475123	37503392	ENST00000373404	AACTCTGTTCTTTAAATGTGACCTTAGATGCACCAGACTCATGCCATCCAAAGGTTGGAG	intergenic							5.83286	47.7791	2.91872	5.14704	5.68312	6.81544	5	55.112	42.582	45.6433	3.22386	3.03635	2.49594	5.29035	5.08358	5.0672
ASHGA5P033416	0.00326442	0.0191167	3.81476	down	noncoding	TCONS_00028501	XLOC_013463	LincRNAs identified by Cabili et al	632	chr20	+	10979012	10981705	TCONS_00028108	ATGTGGCAAATTTTCCCAGCATTTATTTGCACTGCTTACTACATTCACATTCTAGTTTAC	intergenic							5.61994	33.9156	2.67029	4.60188	5	6.85981	5	33.4879	41.8367	26.4222	2.46913	3.04581	2.49594	4.53095	5.05357	4.22113
ASHGA5P023062	0.0011122	0.0102283	3.82661	down	noncoding	ENST00000568843	CTD-2380F24.1	GENCODE	473	chr16	-	19772671	19777366		CACCATTTAAAATTAAGTTTCATTTCACTTCTTCTAGGCTGGAACACAGATGTGGGGCTG	intronic antisense	NM_153208	IQCK	IQ domain-containing protein K	+	19727777	19868859	5.3153	37.2088	2.82612	4.76219	5.62245	5.32344	5	42.584	36.1102	32.9323	3.21199	2.77042	2.49594	4.89394	4.82603	4.5666
ASHGA5P054351	0.00607917	0.0281981	2.328	down	noncoding	ENST00000449712	RP11-117P22.1	GENCODE	703	chr10	-	4693352	4720324		TAGATTCCTGCTAACAAAAGGCGGAGACTCACTGGACAGTTACTGAAGATAGACAGTAGG	intergenic							153.59	450.159	7.32306	8.54215	105.231	243.703	111.835	538.247	433.247	378.984	7.06571	7.6558	7.24767	8.75786	8.61429	8.25431
ASHGA5P053001	0.0134665	0.046577	2.13303	down	noncoding	uc003sxz.3	LOC441204	UCSC_knowngene	1723	chr7	+	26443015	26535986		CAAAATCCCACCAACCAGAGACAGCTATTAATGATTGTGGTATATTTATTGTAAGTCTCT	intergenic							1556.02	3856.36	10.5949	11.6878	1759.92	1473.48	1434.66	3723.48	4537.4	3308.2	10.8762	10.1843	10.7241	11.6039	11.982	11.4775
ASHGA5P058853	0.00104412	0.00988842	3.20448	down	noncoding	uc.168+	uc.168	UCR	220	chr5	+	90928792	90929012		GTCTATTCCTTTGCAACTGACCCATAGAAATTAGCAAGTAAAAGTTATTATACTGGGTTG	intergenic							5	24.9924	2.45604	4.13613	5	5	5	25.3908	29.2868	20.2997	2.46913	2.40305	2.49594	4.09505	4.49324	3.8201
ASHGA5P035215	2.05726e-05	0.00170952	2.17121	down	noncoding	ENST00000446058	ST6GAL2-IT1	GENCODE	388	chr2	-	107439378	107441487		CCTAGCATTGAAGAAAGCAAACTCTAAGAACCTCTTCACCAAAAGTATTTTATTGTTGGA	intron sense-overlapping	NM_001142351	ST6GAL2	beta-galactoside alpha-2,6-sialyltransferase 2 isoform a	-	107418055	107502610	5	17.3297	2.45604	3.57454	5	5	5	18.519	16.895	16.5751	2.46913	2.40305	2.49594	3.58865	3.635	3.49998
ASHGA5P035215	2.05726e-05	0.00170952	2.17121	down	noncoding	ENST00000446058	ST6GAL2-IT1	GENCODE	388	chr2	-	107439378	107441487		CCTAGCATTGAAGAAAGCAAACTCTAAGAACCTCTTCACCAAAAGTATTTTATTGTTGGA	intron sense-overlapping	NM_001142352	ST6GAL2	beta-galactoside alpha-2,6-sialyltransferase 2 isoform b	-	107429531	107503563	5	17.3297	2.45604	3.57454	5	5	5	18.519	16.895	16.5751	2.46913	2.40305	2.49594	3.58865	3.635	3.49998
ASHGA5P035215	2.05726e-05	0.00170952	2.17121	down	noncoding	ENST00000446058	ST6GAL2-IT1	GENCODE	388	chr2	-	107439378	107441487		CCTAGCATTGAAGAAAGCAAACTCTAAGAACCTCTTCACCAAAAGTATTTTATTGTTGGA	intron sense-overlapping	NM_032528	ST6GAL2	beta-galactoside alpha-2,6-sialyltransferase 2 isoform a	-	107418055	107503563	5	17.3297	2.45604	3.57454	5	5	5	18.519	16.895	16.5751	2.46913	2.40305	2.49594	3.58865	3.635	3.49998
ASHGA5P045737	0.0228745	0.0656786	2.82843	down	noncoding	ENST00000428440	RP11-211N8.7	GENCODE	3321	chr9	+	46826491	46833319	ENST00000439824, uc004adg.1	GTCCCAGTGTTGCTTATTGTAAAATTTACTATCTTCACTTAACCACAAGAAAAGCTGTGT	intergenic							8.1761	38.1579	3.30304	4.80304	8.66109	10.8672	5	42.1439	38.6524	33.6774	3.76086	3.65232	2.49594	4.87871	4.92862	4.60181
ASHGA5P019732	5.59807e-06	0.0011092	3.14694	down	noncoding	uc009yix.3	BDNF-AS1	UCSC_knowngene	1182	chr11	+	27528398	27719718	NR_033313, uc009yir.3, uc009yis.3, uc009yiu.3, uc009yiw.3, uc009yiy.3, uc009yiz.3, uc009yja.3, uc009yjb.3	TGTTTTACAGGATTTTCCCTCCTGGTGAGTCAAAATGAACAAGAAATACCCCAGGACCTC	natural antisense	NM_001143805	BDNF	brain-derived neurotrophic factor isoform a preproprotein	-	27676441	27742326	267.148	1022.18	8.11822	9.77217	234.395	341.329	225.718	999.58	947.828	1119.13	8.09595	8.10484	8.15386	9.68758	9.7743	9.85463
ASHGA5P019732	5.59807e-06	0.0011092	3.14694	down	noncoding	uc009yix.3	BDNF-AS1	UCSC_knowngene	1182	chr11	+	27528398	27719718	NR_033313, uc009yir.3, uc009yis.3, uc009yiu.3, uc009yiw.3, uc009yiy.3, uc009yiz.3, uc009yja.3, uc009yjb.3	TGTTTTACAGGATTTTCCCTCCTGGTGAGTCAAAATGAACAAGAAATACCCCAGGACCTC	natural antisense	NM_001143806	BDNF	brain-derived neurotrophic factor isoform a preproprotein	-	27676441	27742326	267.148	1022.18	8.11822	9.77217	234.395	341.329	225.718	999.58	947.828	1119.13	8.09595	8.10484	8.15386	9.68758	9.7743	9.85463
ASHGA5P019732	5.59807e-06	0.0011092	3.14694	down	noncoding	uc009yix.3	BDNF-AS1	UCSC_knowngene	1182	chr11	+	27528398	27719718	NR_033313, uc009yir.3, uc009yis.3, uc009yiu.3, uc009yiw.3, uc009yiy.3, uc009yiz.3, uc009yja.3, uc009yjb.3	TGTTTTACAGGATTTTCCCTCCTGGTGAGTCAAAATGAACAAGAAATACCCCAGGACCTC	natural antisense	NM_001143807	BDNF	brain-derived neurotrophic factor isoform a preproprotein	-	27676441	27741294	267.148	1022.18	8.11822	9.77217	234.395	341.329	225.718	999.58	947.828	1119.13	8.09595	8.10484	8.15386	9.68758	9.7743	9.85463
ASHGA5P019732	5.59807e-06	0.0011092	3.14694	down	noncoding	uc009yix.3	BDNF-AS1	UCSC_knowngene	1182	chr11	+	27528398	27719718	NR_033313, uc009yir.3, uc009yis.3, uc009yiu.3, uc009yiw.3, uc009yiy.3, uc009yiz.3, uc009yja.3, uc009yjb.3	TGTTTTACAGGATTTTCCCTCCTGGTGAGTCAAAATGAACAAGAAATACCCCAGGACCTC	natural antisense	NM_001143808	BDNF	brain-derived neurotrophic factor isoform a preproprotein	-	27676441	27722600	267.148	1022.18	8.11822	9.77217	234.395	341.329	225.718	999.58	947.828	1119.13	8.09595	8.10484	8.15386	9.68758	9.7743	9.85463
ASHGA5P019732	5.59807e-06	0.0011092	3.14694	down	noncoding	uc009yix.3	BDNF-AS1	UCSC_knowngene	1182	chr11	+	27528398	27719718	NR_033313, uc009yir.3, uc009yis.3, uc009yiu.3, uc009yiw.3, uc009yiy.3, uc009yiz.3, uc009yja.3, uc009yjb.3	TGTTTTACAGGATTTTCCCTCCTGGTGAGTCAAAATGAACAAGAAATACCCCAGGACCTC	natural antisense	NM_001143809	BDNF	brain-derived neurotrophic factor isoform d preproprotein	-	27676441	27722600	267.148	1022.18	8.11822	9.77217	234.395	341.329	225.718	999.58	947.828	1119.13	8.09595	8.10484	8.15386	9.68758	9.7743	9.85463
ASHGA5P019732	5.59807e-06	0.0011092	3.14694	down	noncoding	uc009yix.3	BDNF-AS1	UCSC_knowngene	1182	chr11	+	27528398	27719718	NR_033313, uc009yir.3, uc009yis.3, uc009yiu.3, uc009yiw.3, uc009yiy.3, uc009yiz.3, uc009yja.3, uc009yjb.3	TGTTTTACAGGATTTTCCCTCCTGGTGAGTCAAAATGAACAAGAAATACCCCAGGACCTC	natural antisense	NM_001143810	BDNF	brain-derived neurotrophic factor isoform e	-	27676441	27722600	267.148	1022.18	8.11822	9.77217	234.395	341.329	225.718	999.58	947.828	1119.13	8.09595	8.10484	8.15386	9.68758	9.7743	9.85463
ASHGA5P019732	5.59807e-06	0.0011092	3.14694	down	noncoding	uc009yix.3	BDNF-AS1	UCSC_knowngene	1182	chr11	+	27528398	27719718	NR_033313, uc009yir.3, uc009yis.3, uc009yiu.3, uc009yiw.3, uc009yiy.3, uc009yiz.3, uc009yja.3, uc009yjb.3	TGTTTTACAGGATTTTCCCTCCTGGTGAGTCAAAATGAACAAGAAATACCCCAGGACCTC	natural antisense	NM_001143811	BDNF	brain-derived neurotrophic factor isoform a preproprotein	-	27676441	27722600	267.148	1022.18	8.11822	9.77217	234.395	341.329	225.718	999.58	947.828	1119.13	8.09595	8.10484	8.15386	9.68758	9.7743	9.85463
ASHGA5P019732	5.59807e-06	0.0011092	3.14694	down	noncoding	uc009yix.3	BDNF-AS1	UCSC_knowngene	1182	chr11	+	27528398	27719718	NR_033313, uc009yir.3, uc009yis.3, uc009yiu.3, uc009yiw.3, uc009yiy.3, uc009yiz.3, uc009yja.3, uc009yjb.3	TGTTTTACAGGATTTTCCCTCCTGGTGAGTCAAAATGAACAAGAAATACCCCAGGACCTC	natural antisense	NM_001143812	BDNF	brain-derived neurotrophic factor isoform a preproprotein	-	27676441	27722447	267.148	1022.18	8.11822	9.77217	234.395	341.329	225.718	999.58	947.828	1119.13	8.09595	8.10484	8.15386	9.68758	9.7743	9.85463
ASHGA5P019732	5.59807e-06	0.0011092	3.14694	down	noncoding	uc009yix.3	BDNF-AS1	UCSC_knowngene	1182	chr11	+	27528398	27719718	NR_033313, uc009yir.3, uc009yis.3, uc009yiu.3, uc009yiw.3, uc009yiy.3, uc009yiz.3, uc009yja.3, uc009yjb.3	TGTTTTACAGGATTTTCCCTCCTGGTGAGTCAAAATGAACAAGAAATACCCCAGGACCTC	natural antisense	NM_001143813	BDNF	brain-derived neurotrophic factor isoform a preproprotein	-	27676441	27722035	267.148	1022.18	8.11822	9.77217	234.395	341.329	225.718	999.58	947.828	1119.13	8.09595	8.10484	8.15386	9.68758	9.7743	9.85463
[truncated: 2,212 more rows]
