# Supplementary material for: Investigation of TGFβ1-Induced Long Noncoding RNAs in Endothelial Cells
Source: Int J Vasc Med. 2016 Apr 10;2016:2459687. doi: 10.1155/2016/2459687 (PMC4842052; doi:10.1155/2016/2459687)
Supplement: Supplementary file 1 — Quality Assessment of RNA Samples and Data Analysis. RNA integrity and genomic DNA contamination were evaluated by denaturing agarose gel electrophoresis. In all of the samples, the intensity of the upper 28S ribosomal RNA band was about twice that of the lower 18S band thereby confirming the integrity of the RNA studied. The absence of smears above the 28S band attests to the purity of the RNA samples. RNA quantity and purity were also assessed with the NanoDrop ND-1000. The combination of optical density (OD) A260/A280 ratios that were close to 2.0 and A260/A230 ratios that exceeded 1.8 further confirmed the purity of the RNA used. The Box Plot is a well accepted means to quickly visualize the distribution of a dataset. Our Box plots (10th, 90th percentile) showed comparable distributions of expression values after normalization. Hierarchical clustering is a widely used method for analysis of gene expression. Cluster analysis groups samples based on their expression levels with dendrograms summarize the arrangement of said clusters. The supplementary tables report the fold change, P value, false discovery rate, annotations, and raw and normalized intensities for differentially expressed and up-/down-regulated lncRNAs and mRNAs in TGFβ1-treated HUVECs relative to control HUVECs. [file 2459687.f1.zip › Supplement Table C-mRNA_UP_TGFb1-treated_vs_Controlsample.xlsx]

## Sheet: Sheet1
# Fold Change cut-off: 2.0 # P-value cut-off: 0.05 # Condition pairs: TGFb1-treated_vs_Controlsample # Column A: ProbeName it represents probe name. # Column B: P-value, P-value calculated from unpaired t-test. # Column C: FDR, FDR is calculated from Benjamini Hochberg FDR. # Column D: FC (abs), the absolute ratio (no log scale) of normalized intensities between two conditions. # Column E: Regula…
TGFb1-treated_vs_Controlsample 2.0 fold up regulated mRNAs
	P-value and FDR		Fold change and Regulation		Annotations																Group--Raw Intensity		Group--Normalized Intensity		Raw Intensity						Normalized Intensity
ProbeName	P-value	FDR	FC (abs)	Regulation	type	seqname	ccdsID	GeneSymbol	source	RNAlength	chrom	strand	txStart	txEnd	Xhyb	Sequence	EntrezID	Unigene	GO	product	group-TGFb1-treated(raw)	group-Controlsample(raw)	group-TGFb1-treated(normalized)	group-Controlsample(normalized)	[10, TGFb1-treated](raw)	[11, TGFb1-treated](raw)	[12, TGFb1-treated](raw)	[1, Controlsample](raw)	[2, Controlsample](raw)	[3, Controlsample](raw)	[10, TGFb1-treated](normalized)	[11, TGFb1-treated](normalized)	[12, TGFb1-treated](normalized)	[1, Controlsample](normalized)	[2, Controlsample](normalized)	[3, Controlsample](normalized)
ASHGA5P050734	0.000275937	0.00645346	8.03377	up	protein_coding	NM_006287	CCDS2294.1	TFPI	RefSeq	3927	chr2	-	188328957	188419219		AAAGAAAGAAGCAGAGAGTGAAAATAGCATATGAAGAAATTTTTGTTAAAAATATGTGAA	7035	Hs.516578	GO:0004866|GO:0004867|GO:0005576|GO:0005615|GO:0005886|GO:0007596|GO:0007598|GO:0010951	tissue factor pathway inhibitor isoform a precursor	31071	4939.78	15.0304	12.0243	30194.5	31168.4	31850.1	5361.82	5860.24	3597.27	14.9719	14.8551	15.2642	12.1106	12.3527	11.6095
ASHGA5P048972	0.00138314	0.0142371	2.0524	up	protein_coding	ENST00000007264	CCDS10426.1	RPUSD1	GENCODE	2050	chr16	-	834973	838383		GGAGTGGACGCTGGAACCGGACAGCTGAGAGCCGTGGGGCTGGGGCAGGGGGTGTCAGCT	113000	Hs.101742	GO:0008150|GO:0001522|GO:0009451|GO:0005575|GO:0003723|GO:0003674|GO:0009982	RNA pseudouridylate synthase domain containing 1 [Source:HGNC Symbol;Acc:14173]	80.9575	61.4422	6.56925	5.53194	62.1743	101.373	79.3253	63.3386	58.318	62.6701	6.36385	6.53365	6.81024	5.49917	5.55471	5.54193
ASHGA5P033808	0.0475636	0.121697	2.00216	up	protein_coding	NM_001943	CCDS42423.1	DSG2	RefSeq	5677	chr18	+	29078026	29128814		TCTCCGTCATTGACAAACCACCTGGCATGGCAGAAAAATGGAAAATAGCACGCCAAGAAA	1829	Hs.412597	GO:0005509|GO:0005886|GO:0005886|GO:0005911|GO:0006915|GO:0006915|GO:0006921|GO:0007155|GO:0007156|GO:0016021|GO:0030057|GO:0086005|GO:0086069|GO:0086091|GO:0097194	desmoglein-2 preproprotein	18.9478	19.0779	4.69132	3.68976	15.8756	18.8671	22.1007	24.0783	20.1028	13.0526	4.568	4.37529	5.13067	4.01144	3.9101	3.14774
ASHGA5P021815	0.000180111	0.00532841	4.06766	up	protein_coding	NM_144779	CCDS12447.1	FXYD5	RefSeq	927	chr19	+	35645671	35660788		CCGGGCTCAGATGTCGCCCTCTGGTCGCCTGTGTCTTCTCACCATCGTTGGCCTGATTCT	53827	Hs.333418	GO:0003779|GO:0005216|GO:0016021|GO:0030033|GO:0045296|GO:0046588	FXYD domain-containing ion transport regulator 5 precursor	8444.26	2441.99	13.0457	11.0215	9315.89	8242.75	7774.14	2485.58	2537.36	2303.04	13.2116	12.7778	13.1476	11.002	11.1473	10.9151
ASHGA5P010056	0.00728353	0.0357919	2.00537	up	protein_coding	NM_014329	CCDS10849.1	EDC4	RefSeq	4811	chr16	+	67906925	67918417		CCCGCGGGCGGCCCCAGTGCAGAGAGCCCACGGCCATCCAGTGCCTACAATGGGGACCTC	23644	Hs.75682	GO:0000288|GO:0000932|GO:0005515|GO:0005634|GO:0005730|GO:0005737|GO:0005829|GO:0008150|GO:0010467|GO:0016070|GO:0016071|GO:0043231|GO:0043928	enhancer of mRNA-decapping protein 4	54.1098	45.2684	6.07251	5.06864	52.3486	55.5846	54.3962	41.8533	48.9888	44.9632	6.13504	5.77457	6.30791	4.86884	5.29119	5.04588
ASHGA5P029595	0.00269259	0.0205172	3.76286	up	protein_coding	ENST00000335674	CCDS1017.1	LCE3A	GENCODE	270	chr1	-	152595309	152595579		AACTCCTGTGACAGGGGAAGTGGTCAGCAAGGCGGGAGCTCCAGCTGTGGCCACAGTTCT	353142	Hs.553714	GO:0031424	late cornified envelope 3A [Source:HGNC Symbol;Acc:29461]	81.633	35.8122	6.61057	4.69873	82.9651	78.8778	83.0562	29.0914	41.042	37.3032	6.74146	6.219	6.87124	4.31092	5.02618	4.7591
ASHGA5P017814	0.000449201	0.00812322	4.05188	up	protein_coding	NM_019028	CCDS44550.1	ZDHHC13	RefSeq	2448	chr11	+	19138691	19197967		TGGGCTCGCAGTGCAGGAATCACAGCCATGGCCCCCACCCTCCAGGATTTGGTCGATATG	54503	Hs.188569	GO:0000139|GO:0004871|GO:0005794|GO:0007165|GO:0008270|GO:0015095|GO:0016021|GO:0016409|GO:0030660|GO:0043123|GO:0043231	palmitoyltransferase ZDHHC13 isoform 1	4229.11	1216.21	12.0233	10.0047	4636.76	4279.37	3771.21	1354.02	1253.18	1041.44	12.231	11.7497	12.0893	10.1015	10.1581	9.75458
ASHGA5P049173	0.010637	0.0453383	2.47075	up	protein_coding	NM_014771	CCDS10691.1	RNF40	RefSeq	6022	chr16	+	30772932	30787628	NM_001207033	AGAGCTGGAGAAACTGCAGGCCGAACTTCAGGGGGCTGTGCGGACCAATGAGCGCCTCAA	9810	Hs.65238	GO:0000151|GO:0004842|GO:0005515|GO:0005634|GO:0005730|GO:0005737|GO:0005886|GO:0006511|GO:0008270|GO:0010390|GO:0017075|GO:0031625|GO:0032403|GO:0033503|GO:0033523|GO:0042803|GO:0043005	E3 ubiquitin-protein ligase BRE1B isoform 1	18.2187	14.4116	4.58643	3.28148	11.2449	23.2379	20.1732	17.4165	13.3838	12.4345	4.10468	4.64453	5.01007	3.4878	3.28016	3.07648
ASHGA5P041703	1.18527e-05	0.00216313	5.22889	up	protein_coding	ENST00000357905	CCDS4575.1	HIST1H2BB	GENCODE	431	chr6	-	26043454	26043885		CTCTAAATAAGTGCTTATGTAAGCACTTCCAAACCCAAAGGCTCTTTTCAGAGCCACCTA	3018	Hs.553494	GO:0006334|GO:0005634|GO:0005622|GO:0000786|GO:0003677|GO:0043565	histone cluster 1, H2bb [Source:HGNC Symbol;Acc:4751]	20.805	5.39297	4.81841	2.43191	19.4906	23.8365	19.0877	5.29399	5.88491	5	4.84237	4.68146	4.93141	2.43043	2.52253	2.34278
ASHGA5P052328	0.0115728	0.0475527	2.02627	up	protein_coding	NM_032119	CCDS47246.1	GPR98	RefSeq	19333	chr5	+	89854616	90460033		AGTTGTCTCAGGTAATGTGACCTTTGCCCCTGGGGAAACCATTCAAACCTTGTTGTTAGA	84059	Hs.591777	GO:0002142|GO:0004930|GO:0005509|GO:0005515|GO:0005737|GO:0005886|GO:0007186|GO:0007218|GO:0007399|GO:0007605|GO:0009986|GO:0016020|GO:0016021|GO:0016337|GO:0017022|GO:0045494|GO:0048496|GO:0050877|GO:0050910|GO:0050953|GO:0060122	G-protein coupled receptor 98 precursor	123.306	90.8459	7.1405	6.12168	120.825	131.604	117.49	88.2753	106.206	78.0565	7.24749	6.86284	7.31117	6.01177	6.47994	5.87331
ASHGA5P007540	0.000465049	0.00828596	3.44764	up	protein_coding	NM_032584	CCDS33097.1	ZNF347	RefSeq	4242	chr19	-	53641956	53662322	NM_001172675	GCCGCCGAGCGAAGAACCCTTGAAGAAGAGGAAGAGGAAAGAAAGACAAGTCAGGCATGG	84671	Hs.467239	GO:0003677|GO:0005634|GO:0006351|GO:0006355|GO:0008270	zinc finger protein 347 isoform b	16.6882	8.38859	4.45869	2.67307	12.4667	24.9382	12.6597	7.76407	6.9075	10.4942	4.24304	4.74171	4.3913	2.58697	2.59116	2.8411
ASHGA5P013944	0.00165472	0.0154331	2.0831	up	protein_coding	NM_001004057	CCDS33947.1	GRK4	RefSeq	2183	chr4	+	2965342	3042474		GCAGAATGAGGGCTGCCTGACCATGGTCCCCAGTGAGAAGGAAGTGGAACCCAAGCAATG	2868	Hs.32959	GO:0002031|GO:0004703|GO:0005524|GO:0005829|GO:0005938|GO:0007165|GO:0008277|GO:0030425|GO:0031623|GO:0038032|GO:0043025|GO:0050254	G protein-coupled receptor kinase 4 isoform gamma	243.495	157.301	8.01795	6.95922	235.831	274.994	219.66	144.605	149.686	177.613	8.10451	7.82802	8.12134	6.7592	7.01487	7.10359
ASHGA5P003511	0.0199598	0.0680058	2.04053	up	protein_coding	NM_014984	CCDS45808.1	AZI1	RefSeq	3630	chr17	-	79163392	79196751		CTCGGCAGCGGTTCCAGCAGCACCTGGAGCAGGAGCAGTGGGCGCTGCAGCAGCAACGGC	22994	Hs.514578	GO:0000086|GO:0000278|GO:0003674|GO:0005813|GO:0005813|GO:0005829|GO:0007275|GO:0007283|GO:0008150|GO:0015630|GO:0030154|GO:0043231	5-azacytidine-induced protein 1 isoform a	19.22	17.9257	4.6284	3.59945	13.3873	29.3437	14.929	23.2775	16.6339	13.8658	4.33512	4.95125	4.59883	3.95497	3.61037	3.23302
ASHGA5P021858	6.90291e-05	0.00350444	2.93106	up	protein_coding	ENST00000542643	CCDS53276.1	RAP1GAP	GENCODE	3495	chr1	-	21922707	21995856		AGCTCCCCAGACGCCGGCAAGTTGGGGGACCCTGCGTGTCCCGAGATCAAGATCCAGCTG	5909	Hs.148178	GO:0051056|GO:0007165|GO:0006184|GO:0043547|GO:0032318|GO:0005622|GO:0005829|GO:0000139|GO:0005624|GO:0005515|GO:0005096|GO:0042803|GO:0003924|GO:0017016|GO:0030695	RAP1 GTPase activating protein [Source:HGNC Symbol;Acc:9858]	111.208	58.1691	6.99952	5.4481	111.322	130.357	91.9457	63.5065	54.5113	56.4894	7.14316	6.85092	7.00447	5.50277	5.45483	5.3867
ASHGA5P050402	5.98187e-05	0.00328498	2.22885	up	protein_coding	NM_001080473	CCDS46228.1	MFSD2B	RefSeq	1508	chr2	+	24232952	24247145		TGCGGTGGCAATGGCGGCGCCCCCTGCACCAGCCGCCAAGGGGTCCCCGCAGCCGGAGCC	388931	Hs.407482	GO:0006810|GO:0016021	major facilitator superfamily domain-containing protein 2B	91.4008	63.6383	6.73731	5.58101	86.1295	109.741	78.3321	70.425	57.2174	63.2727	6.78494	6.63478	6.7922	5.65974	5.52571	5.55757
ASHGA5P049638	0.00165745	0.0154453	2.57077	up	protein_coding	NM_001199417		ARHGAP23	RefSeq	5913	chr17	+	36584719	36668628		CTGCCACCCGATGAATGGAGTCGCCTTCTGCCTGGTCGGGATCCCGCCCCGCCCGGAGCC	57636	Hs.374446	GO:0005096|GO:0005543|GO:0005622|GO:0007165	rho GTPase-activating protein 23	662.155	310.108	9.35886	7.99666	695.624	676.874	613.967	345.434	294.72	290.171	9.5563	9.03376	9.4865	8.09685	8.04612	7.84699
ASHGA5P028400	0.000194585	0.00551271	2.52554	up	protein_coding	NM_025215	CCDS9275.2	PUS1	RefSeq	2014	chr12	+	132413812	132428406		TCAGGGGTCGGGGATCAGGGCGGGGTCGGGTGCACTGGTAGCCTGCGCATGGGCCTCCAG	80324	Hs.592004	GO:0003677|GO:0003723|GO:0004730|GO:0005634|GO:0005667|GO:0005730|GO:0005739|GO:0008033|GO:0009982|GO:0030374|GO:0031119|GO:0045944	tRNA pseudouridine synthase A, mitochondrial isoform 1	58.857	38.1138	6.1381	4.80151	45.7428	80.2132	50.615	41.5294	33.4864	39.3256	5.96002	6.24171	6.21256	4.85648	4.70439	4.84365
ASHGA5P019518	0.000124948	0.00459716	3.2967	up	protein_coding	NM_172209	CCDS34427.2	TAPBP	RefSeq	3518	chr6	-	33267471	33282164		AGTGTACACGTGGTACTGACTGTCCTCACCCACACCCCTGCCCCTCGAGTGAGACTGGGA	6892	Hs.370937	GO:0000139|GO:0002474|GO:0002479|GO:0005515|GO:0005783|GO:0005789|GO:0006461|GO:0006890|GO:0006952|GO:0006955|GO:0015433|GO:0016021|GO:0019885|GO:0042288|GO:0042590|GO:0042605|GO:0042824|GO:0042825|GO:0046978|GO:0046978|GO:0046979|GO:0046979|GO:0050823|GO:0051082|GO:0071556	tapasin isoform 3 precursor	8922.33	3132.57	13.1247	11.4036	9359.87	9099.14	8307.97	3364.87	3108.43	2924.41	13.2169	12.9201	13.2369	11.4507	11.4698	11.2904
ASHGA5P046387	0.00222945	0.0183353	3.07124	up	protein_coding	NM_001039582	CCDS35503.2	PNCK	RefSeq	1888	chrX	-	152935187	152939816		CCCAGCCGGGCCGCAGCTCCGGGAGGCGGCGCGAGCGAGCAGTGGGCTGGGCGGTGGCGG	139728	Hs.436667	GO:0004683|GO:0005516|GO:0005524|GO:0005634|GO:0005737	calcium/calmodulin-dependent protein kinase type 1B isoform a	18.5332	11.7009	4.60248	2.98366	11.8608	25.7508	17.9879	13.4641	9.57568	12.0629	4.17445	4.78424	4.84875	3.10412	2.81133	3.03552
ASHGA5P050467	0.000325544	0.00696237	2.13911	up	protein_coding	NM_002354	CCDS1833.1	EPCAM	RefSeq	1731	chr2	+	47596286	47614167		CCGGGCCCCTCCCGCGCCCCTCTTCTCGGCGCGCGCGCAGCATGGCGCCCCCGCAGGTCC	4072	Hs.542050	GO:0001657|GO:0005515|GO:0005886|GO:0005923|GO:0008284|GO:0009986|GO:0016021|GO:0016323|GO:0016324|GO:0016328	epithelial cell adhesion molecule precursor	11338.5	6046.1	13.4435	12.3464	12087.8	12247.9	9679.76	6105.6	5555.25	6477.45	13.5772	13.3214	13.4317	12.3089	12.2665	12.4639
ASHGA5P012946	0.00364493	0.0240778	2.50963	up	protein_coding	NM_001010938	CCDS33927.1	TNK2	RefSeq	4222	chr3	-	195590235	195622432		GATCCAGATGGTGGAGCAGCTCTTCGGGCTGGGTCTGCGGCCCAGAGGGGAGTGCCACAA	10188	Hs.518513	GO:0004674|GO:0004712|GO:0004713|GO:0004715|GO:0005095|GO:0005154|GO:0005515|GO:0005524|GO:0005634|GO:0005737|GO:0005768|GO:0005886|GO:0005905|GO:0005912|GO:0006897|GO:0007166|GO:0007264|GO:0016310|GO:0030136|GO:0030659|GO:0046872|GO:0050699|GO:0050731|GO:0070436|GO:2000369	activated CDC42 kinase 1 isoform 2	37.9065	27.3804	5.59371	4.26623	29.7584	45.0597	38.9013	32.7978	20.6854	28.6579	5.39559	5.51107	5.87446	4.49867	3.95276	4.34728
ASHGA5P012227	0.00408064	0.0254928	2.85189	up	protein_coding	ENST00000376581	CCDS32000.1	FARP1	GENCODE	1321	chr13	+	98795433	98897558		GGAGGCATTTGAAGTTCCAATGGTGTCCTCATCCTCCTTCCTCAAAGCCACCGGCTCCTC	10160	Hs.403917	GO:0035023|GO:0010923|GO:0005737|GO:0005856|GO:0019898|GO:0005543|GO:0005089|GO:0008092	FERM, RhoGEF (ARHGEF) and pleckstrin domain protein 1 (chondrocyte-derived) [Source:HGNC Symbol;Acc:3591]	3021.34	1217.21	11.5228	10.0109	3315.24	2699.01	3049.76	1339.58	1236.22	1075.83	11.7348	11.0588	11.7749	10.0913	10.1409	9.80048
ASHGA5P014000	0.0132543	0.052099	2.39898	up	protein_coding	NM_014709	CCDS42686.1	USP34	RefSeq	11326	chr2	-	61414589	61697849		TCATGGACTGTGTGGCAGCTAGACTGTCTTGCTTGCTTGCTGAAGTTAATATGCCAGTTT	9736	Hs.644708	GO:0004197|GO:0004221|GO:0004843|GO:0005515|GO:0006511|GO:0016055|GO:0071108|GO:0090263	ubiquitin carboxyl-terminal hydrolase 34	357.691	192.229	8.51713	7.25471	269.091	373.756	430.225	230.408	186.335	159.946	8.28947	8.24274	9.01917	7.46521	7.35688	6.94204
ASHGA5P052441	0.000382028	0.00752785	3.90538	up	protein_coding	ENST00000435817	CCDS47295.1	FCHSD1	GENCODE	4320	chr5	-	141018868	141030986		TTCCGGAGTCCAGTGGCTGACCGCCTTGCTGGAGCGGAGATGCAGCCGCCGCCCCGAAAA	89848	Hs.591257	GO:0005515	FCH and double SH3 domains 1 [Source:HGNC Symbol;Acc:25463]	216.777	78.3547	7.86516	5.8997	231.277	224.385	194.67	90.0437	70.3221	74.6982	8.07995	7.54584	7.96969	6.04094	5.85197	5.80619
ASHGA5P048249	3.46797e-05	0.00276415	3.93757	up	protein_coding	ENST00000312457	CCDS8165.1	GPR152	GENCODE	1429	chr11	-	67218771	67220200		TCCAGACCCCTGCACCTGCTGCCAGTTCTGTGCCCAGTCCCTGTGATGAAGCTTCCCCAA	390212	Hs.567997	GO:0007186|GO:0016021|GO:0005886|GO:0004930	G protein-coupled receptor 152 [Source:HGNC Symbol;Acc:23622]	5740.45	1709.69	12.4816	10.5043	5527.24	6335.03	5359.07	1844.74	1666.6	1617.73	12.491	12.3401	12.6138	10.5543	10.5675	10.3912
ASHGA5P034714	0.000169555	0.00524941	4.63749	up	protein_coding	NM_153329	CCDS12766.1	ALDH16A1	RefSeq	3119	chr19	+	49956472	49974305		GCGGACGTAGACTCGGCCGTGGAGGGTGTCGTGGACGCCGCCTGGTCCGACCGCGGCCCG	126133	Hs.719998	GO:0016620	aldehyde dehydrogenase family 16 member A1 isoform 1	74.4179	26.8151	6.473	4.25965	60.9306	84.4753	77.8478	27.9936	26.5934	25.8583	6.33379	6.30068	6.78453	4.24724	4.34559	4.18613
ASHGA5P014361	0.0010653	0.0123306	3.37015	up	protein_coding	NM_024307	CCDS10671.2	GDPD3	RefSeq	1115	chr16	-	30116130	30124878		CCATGGAGAACTCCATGGCCCAGCGCTCGGACCTCCTGGAGCTCGACTGTCAGCTGACAC	79153	Hs.289015	GO:0006071|GO:0006629|GO:0008889|GO:0016021|GO:0046872	glycerophosphodiester phosphodiesterase domain-containing protein 3	59.3424	30.1353	6.19243	4.43962	57.1987	58	62.8285	30.2178	26.9787	33.2094	6.24988	5.83025	6.49717	4.37111	4.36751	4.58025
ASHGA5P013618	0.000426921	0.00787979	7.82494	up	protein_coding	NM_023000	CCDS45114.1	ARID4A	RefSeq	5630	chr14	+	58765221	58840451		TGTCCTAGACAATTCAAATGAATTAGATAATATGAACAGTACAGAGAGAATCTCATTTCT	5926	Hs.161000	GO:0003677|GO:0003700|GO:0005634|GO:0005634|GO:0006366|GO:0017053|GO:0045892	AT-rich interactive domain-containing protein 4A isoform II	36.3212	6.07991	5.44212	2.47404	20.7177	57.0571	31.1887	7.74979	5.48994	5	4.9217	5.8081	5.59656	2.5858	2.49355	2.34278
ASHGA5P001492	0.000175837	0.00526293	2.79875	up	protein_coding	NM_138393	CCDS12070.1	REEP6	RefSeq	1393	chr19	+	1491164	1497924		ATAACCAGGAACGTCAAGCCAAGCCAGACCCCGCAGCCGAAGGACAAGTGAAGCAGCCCC	92840	Hs.76277	GO:0016021	receptor expression-enhancing protein 6	127.446	65.3217	7.1137	5.62892	101.495	188.939	91.9037	69.5708	62.9984	63.3959	7.01521	7.32184	7.00405	5.64368	5.68297	5.56011
ASHGA5P050131	9.91188e-05	0.00411127	4.35585	up	protein_coding	NM_133644	CCDS32950.1	GTPBP3	RefSeq	2708	chr19	+	17448325	17453540		TCTCTCTCTGCCTGCCTTCTCTCACCCACAGCCGACATCGAAGTACGGGCACTGCAGGTG	84705	Hs.334885	GO:0003924|GO:0005525|GO:0005739|GO:0006400	tRNA modification GTPase GTPBP3, mitochondrial isoform IV	12497.8	3242.79	13.5751	11.4521	11170.3	16321.6	10001.4	3606.6	3184.7	2937.07	13.4482	13.7951	13.4819	11.5583	11.5023	11.2958
ASHGA5P013790	0.0020134	0.0172863	3.22723	up	protein_coding	NM_001128227	CCDS47965.1	GNE	RefSeq	5313	chr9	-	36214438	36277053		AGGACCTCATGAACTCTATTTTAAGAACCTCTCAAAACGAAACAAGCAAATCATGGAGAA	10020	Hs.5920	GO:0005524|GO:0005737|GO:0005829|GO:0006045|GO:0006047|GO:0006054|GO:0007155|GO:0008761|GO:0009103|GO:0009384|GO:0046380|GO:0046872	bifunctional UDP-N-acetylglucosamine 2-epimerase/N-acetylmannosamine kinase isoform 1	48.3039	26.4345	5.91005	4.21975	51.4146	55.599	37.8981	22.427	31.7113	25.1651	6.11074	5.77516	5.84425	3.89644	4.62094	4.14187
ASHGA5P005907	0.000418546	0.00780451	3.49482	up	protein_coding	NM_003598	CCDS12761.1	TEAD2	RefSeq	2220	chr19	-	49843854	49865714	NM_001256659	AGGCCGGGAGGCCCAGATGGGGGAACCCCGGGCTGGGGCCGCCCTGGACGATGGCAGCGG	8463	Hs.515534	GO:0001570|GO:0001843|GO:0003143|GO:0003677|GO:0003700|GO:0003700|GO:0003705|GO:0005515|GO:0005634|GO:0005654|GO:0005667|GO:0006355|GO:0006367|GO:0010467|GO:0030903|GO:0035329|GO:0045944|GO:0048339|GO:0048368|GO:0060548	transcriptional enhancer factor TEF-4 isoform 3	12.9589	5.03515	4.18663	2.38141	14.7212	13.1447	11.0106	5	5.10545	5	4.46592	3.90288	4.1911	2.34074	2.46072	2.34278
ASHGA5P049330	0.00163681	0.0153455	2.24952	up	protein_coding	NM_001077418	CCDS45530.1	TMEM231	RefSeq	2911	chr16	-	75572014	75590170	NM_001077419	GCCAAACTTGGTCCCCCGGCTCGCGGAGTGCCTGCGAGCGGTGCTCATGGCGCTCTATGA	79583	Hs.156784	GO:0007224|GO:0016021|GO:0035869|GO:0036038|GO:0042384|GO:0060170	transmembrane protein 231 isoform 2	45.4772	34.9008	5.83618	4.66656	40.206	53.7432	42.4822	30.8717	34.2042	39.6265	5.79264	5.73101	5.98488	4.40636	4.73832	4.855
ASHGA5P021942	0.000723968	0.010226	2.34867	up	protein_coding	NM_001159727	CCDS53834.1	PLBD2	RefSeq	2736	chr12	+	113796370	113827458		TCAACAGCGGCACCGGCATGGTGGTGGTGGCTGACAAGACCTCGGAGCTCTACCAGAAGA	196463	Hs.115896	GO:0016042|GO:0016787|GO:0043202	putative phospholipase B-like 2 isoform 2 precursor	55.3815	38.3278	6.04694	4.8151	52.8973	76.4127	36.8346	41.2891	37.7924	35.9019	6.14859	6.18045	5.81178	4.84861	4.89492	4.70176
ASHGA5P002049	2.19432e-05	0.00248377	3.40081	up	protein_coding	NM_022719	CCDS13756.1	DGCR14	RefSeq	5405	chr22	-	19117791	19132190		ATTTGGATTTGTTGCCACTCCTTCCCCTGCCCCTGGTGTGAACGAGTCCCCGATGATGAC	8220	Hs.517407	GO:0000398|GO:0003674|GO:0005634|GO:0007399|GO:0071013	protein DGCR14	43528.4	15608.6	15.5244	13.7585	45893.3	50419.1	34272.8	16153.1	15924.6	14748	15.5987	15.6014	15.373	13.7663	13.7823	13.7268
ASHGA5P055718	0.00320795	0.0225741	2.78471	up	protein_coding	ENST00000545875	CCDS53846.1	GOLGA3	GENCODE	3784	chr12	-	133360453	133405426		GGAGGACGAGGTGAGGCCTGGCCATCTGCTGTGGCGGCAGCGTGGGGCAGGTCACGTGAG	2802	Hs.507333	GO:0006891|GO:0005634|GO:0000139|GO:0005794|GO:0032580|GO:0017119|GO:0005793|GO:0005215	golgin A3 [Source:HGNC Symbol;Acc:4426]	45.5221	27.5057	5.7739	4.29637	28.1756	64.0996	44.2912	31.3186	24.7074	26.4911	5.32713	5.95744	6.03711	4.42643	4.23663	4.22604
ASHGA5P046733	0.0035111	0.0236014	6.94018	up	protein_coding	NM_012227		GTPBP6	RefSeq	1877	chrY	-	171425	180887		TTGAAAAGGGACGTCGCCCACCTGTACCGAGGAGTCGGCTCGCGCTACATCATGGGGTCA	8225	Hs.437145	GO:0005525	putative GTP-binding protein 6	222.429	50.0852	7.88119	5.08621	168.262	260.258	238.767	39.2499	30.6888	80.317	7.66866	7.74831	8.22659	4.77427	4.56968	5.91469
ASHGA5P001918	7.3437e-05	0.00365662	4.34184	up	protein_coding	ENST00000249075	CCDS13872.1	LIF	GENCODE	3969	chr22	-	30636435	30642840		AATGAAGGTCTTGGCGGCAGGAGTTGTGCCCCTGCTGTTGGTTCTGCACTGGAAACATGG	3976	Hs.2250	GO:0007275|GO:0008285|GO:0001974|GO:0016525|GO:0006955|GO:0007566|GO:0031100|GO:0008284|GO:0045944|GO:0060041|GO:0060135|GO:0033138|GO:0060707|GO:0050731|GO:0043410|GO:0048708|GO:0048666|GO:0046888|GO:0046697|GO:0042517|GO:0048711|GO:0010976|GO:0048286|GO:0042503|GO:0045835|GO:0051461|GO:0019827|GO:0070373|GO:0048644|GO:0060463|GO:0045651|GO:0060290|GO:0060426|GO:0072108|GO:0072307|GO:0060708|GO:…	leukemia inhibitory factor [Source:HGNC Symbol;Acc:6596]	12165.2	3256.79	13.5641	11.4458	12429.9	13576.8	10489	3085.56	2876.3	3808.52	13.6297	13.5028	13.5599	11.3076	11.3438	11.6861
ASHGA5P006906	0.00398458	0.0251154	2.05183	up	protein_coding	ENST00000325351	CCDS12930.1	ZNF784	GENCODE	1996	chr19	-	56132106	56135941		ACTGGACCTGGTCCTGGTGCCTGATGACTGCCGGCCTGGCACACCCCCGAGTGACCTCAT	147808	Hs.53996	GO:0006351|GO:0006355|GO:0005634|GO:0005622|GO:0003677|GO:0008270	zinc finger protein 784 [Source:HGNC Symbol;Acc:33111]	180.173	123.114	7.62451	6.5876	182.549	187.174	170.797	119.356	122.904	127.081	7.76713	7.3097	7.7967	6.45414	6.70883	6.59982
ASHGA5P043635	0.00367673	0.0241796	2.64444	up	protein_coding	ENST00000395891	CCDS5469.2	HECW1	GENCODE	6839	chr7	+	43152197	43602938		GTAAGCCAGCTTCCTTCCCTGAGGCCTGAACATCATCACTACCCAACAATCGATGAGCCT	23072	Hs.164453	GO:0006464|GO:0042787|GO:0005634|GO:0005737|GO:0005622|GO:0005515|GO:0004842|GO:0016881	HECT, C2 and WW domain containing E3 ubiquitin protein ligase 1 [Source:HGNC Symbol;Acc:22195]	1551.24	685.53	10.6002	9.19728	1563.17	1468.13	1622.42	694.219	703.098	659.272	10.7112	10.18	10.9095	9.14331	9.34568	9.10284
ASHGA5P010542	3.39306e-05	0.00274622	57.4641	up	protein_coding	NM_004342	CCDS5834.1	CALD1	RefSeq	4476	chr7	+	134464163	134655480	NM_033140	AGAAAATCAGATCAAAGATGAAAAGATTAAAAAGGACAAAGAACCCAAAGAAGAAGTTAA	800	Hs.490203	GO:0003779|GO:0005516|GO:0005523|GO:0005829|GO:0005856|GO:0005884|GO:0005886|GO:0006928|GO:0006936|GO:0014069|GO:0015629|GO:0017022|GO:0030016|GO:0030478|GO:0032092|GO:0043025|GO:0051017	caldesmon isoform 2	448.228	11.417	8.83352	2.98893	415.04	433.79	495.854	8.45835	12.1616	13.6311	8.85807	8.43944	9.20303	2.62773	3.12984	3.20921
ASHGA5P016832	0.021661	0.071775	2.1835	up	protein_coding	ENST00000434772	CCDS12635.1	ZNF223	GENCODE	2414	chr19	+	44556163	44572142		ATAGCAACCCAAAGGGAAGGGAATTCAGGAGGCAAGATCCAACCTGAGATGAAGACTTTT	7766	Hs.720813	GO:0008150|GO:0006351|GO:0006355|GO:0005634|GO:0005622|GO:0003677|GO:0008270|GO:0003676	zinc finger protein 223 [Source:HGNC Symbol;Acc:13016]	39.9606	32.9555	5.63668	4.51004	37.1999	53.9263	28.7555	40.5816	20.1484	38.1366	5.6914	5.7353	5.48333	4.82164	3.9138	4.79467
ASHGA5P020842	4.23932e-05	0.00294572	12.8347	up	protein_coding	NM_001161780	CCDS55262.1	PDP1	RefSeq	4247	chr8	+	94929161	94938296		ATCGTTTGGTCTCCTGCCGTGCCCGGAGAATGTGTGTGTGTCCCGGGCCCAGACGAATTG	54704	Hs.22265	GO:0004722|GO:0004724|GO:0004741|GO:0005509|GO:0005759|GO:0006090|GO:0010510|GO:0032403|GO:0035970|GO:0044281	pyruvate dehyrogenase phosphatase catalytic subunit 1 isoform 2	4610.51	418.492	12.1258	8.44384	3574.64	5694.36	4562.52	447.818	437.041	370.616	11.8482	12.1739	12.3554	8.48445	8.62801	8.21906
ASHGA5P005327	0.0401968	0.108514	2.62863	up	protein_coding	NM_139280	CCDS11355.1	ORMDL3	RefSeq	2169	chr17	-	38077295	38083884		TTGATCTTCGGCCCCACACGAACAGCAGAGAGGGGCAGCAGGATGAATGTGGGCACAGCG	94103	Hs.514151	GO:0005515|GO:0005783|GO:0006672|GO:0016021|GO:0035339	ORM1-like protein 3	15.0409	9.9906	4.20386	2.80954	6.03879	23.3212	15.7628	10.1765	11.2439	8.55142	3.29681	4.64831	4.66645	2.74747	3.01608	2.66508
ASHGA5P034098	0.0359497	0.100888	2.98275	up	protein_coding	NM_001098818	CCDS42523.1	PDE4C	RefSeq	5073	chr19	-	18318770	18337285	NR_040546	TCAGGAAGCTTTTGGTGAATCAGAGCATCCGCCTGCAGCGGCGCTTCACGGTGGCCCATC	5143	Hs.132584	GO:0004115|GO:0005829|GO:0006198|GO:0007165|GO:0008144|GO:0046676|GO:0046872|GO:0072372	cAMP-specific 3',5'-cyclic phosphodiesterase 4C isoform PDE4C3	11.9489	5.34132	4.00933	2.43269	16.2328	6.60966	13.0041	5	5.79992	5.22404	4.59871	3.00482	4.42446	2.34074	2.51631	2.44101
ASHGA5P052386	1.58476e-05	0.00228311	3.98386	up	protein_coding	ENST00000395266	CCDS4145.1	SLC27A6	GENCODE	2616	chr5	+	128301209	128369335	NM_001017372	TAAAACTTTAAGATTTTTATATCTAGAACTTTCATATGCTTTCTTAGGAAGAGTGAGAGG	28965	Hs.49765	GO:0055085|GO:0015909|GO:0000038|GO:0008152|GO:0016021|GO:0005886|GO:0042383|GO:0000166|GO:0003824|GO:0004467|GO:0031957	solute carrier family 27 (fatty acid transporter), member 6 [Source:HGNC Symbol;Acc:11000]	29.8706	14.2137	5.27086	3.27669	29.714	37.3474	22.5505	15.2863	13.8847	13.4702	5.39328	5.26192	5.15738	3.30245	3.3347	3.19293
ASHGA5P052676	4.16693e-05	0.00291494	3.05812	up	protein_coding	NM_172197	CCDS4747.1	AGER	RefSeq	1353	chr6	-	32148744	32152099	NM_001136, NM_001206929, NM_001206932, NM_001206934, NM_001206940, NM_001206966, NR_038190	AAGTCCCTGCCCAGCCCTCTCCTCAAATCCACTGGATGAAGGATGTGAGTGACCTGGAGA	177	Hs.534342	GO:0004872|GO:0004888|GO:0005515|GO:0005576|GO:0005886|GO:0005887|GO:0006954|GO:0007166|GO:0009611|GO:0031175|GO:0044548|GO:0045087|GO:0051092	advanced glycosylation end product-specific receptor isoform 7 precursor	25533	10034.1	14.7125	13.0998	24849.9	29654.9	22094.1	10093	9245.76	10763.4	14.6732	14.7787	14.6854	13.0507	12.9995	13.2493
ASHGA5P000784	0.00203414	0.0173746	2.33592	up	protein_coding	NM_001031850	CCDS33038.1	PSG6	RefSeq	1728	chr19	-	43406233	43422076		ATCCATGATAGTCAAAGTCTCTGGTCCCTGCCATGGAAACCAGACAGAGTCTCATTAATG	5675	Hs.646353	GO:0003674|GO:0005576|GO:0007565	pregnancy-specific beta-1-glycoprotein 6 isoform b precursor	202.208	119.909	7.76947	6.54548	214.132	207.095	185.397	127.013	114.356	118.358	7.97208	7.43462	7.90173	6.54839	6.59693	6.49113
ASHGA5P007399	0.000544743	0.00899592	2.19042	up	protein_coding	NM_001024216	CCDS30609.1	FBLIM1	RefSeq	2793	chr1	+	16091458	16113084		TATGCAGCTCTTCAATGGAGACATCTGTGCCTTCTGCCACAAGACCGTGTCCCCCCGAGA	54751	Hs.530101	GO:0001725|GO:0005829|GO:0005925|GO:0005938|GO:0008270|GO:0008360|GO:0016337|GO:0030054|GO:0031005|GO:0033623|GO:0034329|GO:0043231	filamin-binding LIM protein 1 isoform c	440.243	250.651	8.80085	7.66965	465.561	504.505	350.663	261.771	233.64	256.543	9.01169	8.63331	8.75755	7.65509	7.69739	7.65645
ASHGA5P038653	0.000246885	0.00615361	3.43997	up	protein_coding	ENST00000412723	CCDS3324.1	PIGZ	GENCODE	2701	chr3	-	196673213	196695704		AGTTTTACCCCAGCAGCTCCTGCCGCTCGGTGCTCTTCCCCCTGCTGATCTCTGGTTCCA	80235	Hs.518403	GO:0006506|GO:0016021|GO:0005783|GO:0031227|GO:0016757|GO:0000030|GO:0000026	phosphatidylinositol glycan anchor biosynthesis, class Z [Source:HGNC Symbol;Acc:30596]	3768.15	1267.75	11.8551	10.0727	3854.35	3888.39	3561.71	1365.54	1239.48	1198.24	11.9694	11.5922	12.0038	10.1175	10.1442	9.95641
ASHGA5P053056	4.74971e-06	0.00177926	4.58274	up	protein_coding	ENST00000533357	CCDS1229.2	MPZ	GENCODE	1955	chr1	-	161274524	161279762		CCTGGTCCCCCACTTTCTCAACCCCACAGATGCTCCGGGCCCCTGCCCCTGCCCCAGCTA	4359	Hs.591486	GO:0007268|GO:0045217|GO:0005886|GO:0005887|GO:0005515|GO:0005198	myelin protein zero [Source:HGNC Symbol;Acc:7225]	21394.4	5611.51	14.4298	12.2336	20957.4	25256	17970	5748.62	5159.63	5926.3	14.41	14.5009	14.3786	12.2089	12.1542	12.3378
ASHGA5P034489	0.00696531	0.0348105	2.17202	up	protein_coding	ENST00000254323	CCDS32924.1	ZSWIM4	GENCODE	4339	chr19	+	13906273	13943044		TTTCCACGCAGTGAACGGGAAATATGTATGTACTCGTCGCTGGGTTACCCGCCCCCAGAG	65249	Hs.466015	GO:0008270	zinc finger, SWIM-type containing 4 [Source:HGNC Symbol;Acc:25704]	57.3625	44.1274	6.14913	5.03009	61.9368	53.1207	57.0301	45.1575	40.3959	46.8287	6.35913	5.71674	6.37152	4.98747	5.0003	5.10251
ASHGA5P048929	0.000927021	0.0116066	7.71381	up	protein_coding	NM_024708	CCDS10388.1	ASB7	RefSeq	1769	chr15	+	101142754	101170414		GAAGTCACAAGTATGTAATATAATTATTACTTTATTGCATTTTTTAAAAATTTGCATCTT	140460	Hs.31845	GO:0005622|GO:0016567|GO:0035556	ankyrin repeat and SOCS box protein 7 isoform 1	853.995	141.222	9.71731	6.76987	937.022	858.846	766.115	120.398	183.639	119.627	9.97205	9.36601	9.81386	6.46953	7.33409	6.50598
ASHGA5P037606	0.00158239	0.0151777	2.72917	up	protein_coding	NM_020070	CCDS13809.1	IGLL1	RefSeq	915	chr22	-	23915312	23922495	NM_152855	GCTGCATCGCAGAGCAGGGCCCTGGGCCCTGGAGCCCCTGGAGGAAGCAGCCGGTCCAGC	3543	Hs.348935	GO:0005576|GO:0006955|GO:0016020	immunoglobulin lambda-like polypeptide 1 isoform a precursor	42.9841	28.1143	5.77077	4.32231	42.2394	48.0991	38.6137	28.1139	32.1277	24.1013	5.85605	5.59099	5.86526	4.25371	4.63989	4.07333
ASHGA5P013688	0.0234551	0.0754825	2.06248	up	protein_coding	ENST00000395822	CCDS54477.1	ZBP1	GENCODE	2073	chr20	-	56178901	56195632		TGCTGACCCGGGCAGAGAAGCCGAGAGGCCCCAGCAACATGCAGCTACAATTCCAGAGAC	81030	Hs.302123	GO:0003723|GO:0003726	Z-DNA binding protein 1 [Source:HGNC Symbol;Acc:16176]	2451	1359.62	11.2159	10.1716	2620.27	2106.79	2625.96	1430.43	1451.49	1196.95	11.4027	10.6899	11.5552	10.1866	10.3733	9.95479
ASHGA5P053457	0.0115116	0.0474018	2.36329	up	protein_coding	NM_016027	CCDS6208.1	LACTB2	RefSeq	1553	chr8	-	71549500	71581447		CTGGAGTATCCAGATAGGCGACACGCCGGCGGGCGGCTGAGGCGGGAATGGCTGCTGTAC	51110	Hs.118554	GO:0005739|GO:0016787|GO:0046872	beta-lactamase-like protein 2	44.1293	30.1631	5.67105	4.43025	38.9968	70.3034	23.0876	35.9938	27.1726	27.3229	5.75367	6.07291	5.18656	4.63781	4.37737	4.27558
ASHGA5P006590	0.00497632	0.0285021	2.27296	up	protein_coding	NM_012446	CCDS4056.1	SSBP2	RefSeq	4441	chr5	-	80713178	81047072	NM_001256732	GTTCTTTCAGCCTTTTATGTCACCTCGGTACCCTGGAGGTCCAAGGCCCCCATTGAGGAT	23635	Hs.102735	GO:0003697|GO:0005634|GO:0005737|GO:0006355	single-stranded DNA-binding protein 2 isoform 2	360.991	209.159	8.54371	7.35914	336.225	421.72	325.027	202.743	154.599	270.136	8.5761	8.40039	8.65465	7.27798	7.06489	7.73455
ASHGA5P010902	0.000430841	0.00793056	3.84116	up	protein_coding	ENST00000368094	CCDS44254.1	IGSF9	GENCODE	4044	chr1	-	159896828	159915386		TCACTGTGCTCTACCCAGCCCAGGTGACAGCTATGCCTCCTGAGACACCCCTGCCCATAG	57549	Hs.591472	GO:0016358|GO:0016021|GO:0005886|GO:0030054|GO:0030425|GO:0045202|GO:0005515	immunoglobulin superfamily, member 9 [Source:HGNC Symbol;Acc:18132]	2545.21	757.218	11.2766	9.3351	2757.35	2624.13	2254.16	795.061	804.177	672.416	11.4737	11.0108	11.3454	9.33861	9.53702	9.12968
ASHGA5P011849	4.74513e-05	0.0030338	2.78151	up	protein_coding	NM_021809	CCDS13278.1	TGIF2	RefSeq	3415	chr20	+	35202009	35222355		GCTGGGAAAAGTTTACCCAAGGTCCAGCCTAGCCCCTAGGCACCATGTCGGACAGTGATC	60436	Hs.632264	GO:0000122|GO:0003700|GO:0005634|GO:0005654|GO:0006351|GO:0006355|GO:0006367|GO:0007179|GO:0010467|GO:0043565	homeobox protein TGIF2	691.885	296.29	9.3985	7.92263	624.749	892.99	557.916	332.492	246.414	309.965	9.40431	9.42754	9.36363	8.03636	7.77743	7.9541
ASHGA5P053003	0.00449435	0.0268073	2.18487	up	protein_coding	NM_006735	CCDS5403.1	HOXA2	RefSeq	1791	chr7	-	27139972	27142394		TTACTAAAAACATTAAAGCAAAACAAAGCATCACCAAACAAAAACTCCTTTGACCAGGTG	3199	Hs.592177	GO:0000122|GO:0001709|GO:0002076|GO:0003700|GO:0005634|GO:0005730|GO:0006351|GO:0007379|GO:0008045|GO:0009952|GO:0009953|GO:0021568|GO:0021658|GO:0035284|GO:0042474|GO:0043565|GO:0045665|GO:0045944|GO:0048703	homeobox protein Hox-A2	692.614	378.698	9.41582	8.28828	744.644	723.006	610.192	410.428	393.318	332.349	9.64187	9.12714	9.47846	8.34609	8.46698	8.05177
ASHGA5P045481	0.00321114	0.0225814	2.51774	up	protein_coding	ENST00000373314	CCDS35144.1	FAM129B	GENCODE	3760	chr9	-	130267617	130341268		AACTGGGCCAGTTCCGGTCCCTTCCTTTTGGGGCTCTCACTCTGGAGGATGGGGTGGATG	64855	Hs.522401	GO:0043066|GO:0005829|GO:0005912|GO:0005515|GO:0005543	family with sequence similarity 129, member B [Source:HGNC Symbol;Acc:25282]	872.842	409.696	9.7508	8.41868	935.41	844.092	839.025	446.972	384.653	397.463	9.96988	9.33861	9.94392	8.483	8.43833	8.3347
ASHGA5P001908	1.95145e-05	0.00239831	2.39429	up	protein_coding	NM_021115	CCDS13833.1	SEZ6L	RefSeq	6573	chr22	+	26565439	26779563	NM_001184773	TGGAACGGGCCCCTGCCCGTGTGTAAAGTTAATCAAGACAGTTTTGAACATGCTTTAGAA	23544	Hs.194766	GO:0005789|GO:0016021	seizure 6-like protein isoform 1 precursor	72.1937	48.3995	6.43114	5.17154	67.3465	87.408	61.8264	49.2248	47.1423	48.8315	6.4714	6.34906	6.47297	5.11637	5.23517	5.16308
ASHGA5P053583	0.000171357	0.00525252	3.87727	up	protein_coding	NM_177458	CCDS34952.1	LYNX1	RefSeq	589	chr8	-	143845755	143851246		AGGAGAACATGCAGCTCGGCACTGGGCTCCTGCTGGCCGCCGTCCTGAGCCTGCAGCTGG	66004	Hs.158665	GO:0005576|GO:0005886|GO:0030425|GO:0031225	ly-6/neurotoxin-like protein 1 isoform b precursor	719.011	227.074	9.47754	7.5225	720.156	753.101	683.777	232.774	211.892	236.556	9.59723	9.19352	9.64187	7.482	7.55543	7.53007
ASHGA5P012326	0.0309452	0.0912437	2.62359	up	protein_coding	NM_016290	CCDS4408.1	UIMC1	RefSeq	2629	chr5	-	176332005	176433443		CAAGGTTGAGACAAAAGGATGCCACGGAGAAAGAAAAAAGTTAAAGAAGTCTCCGAATCT	51720	Hs.232721	GO:0005515|GO:0005634|GO:0006302|GO:0006351|GO:0010212|GO:0031572|GO:0042393|GO:0045739|GO:0045892|GO:0046965|GO:0070530|GO:0070531|GO:0070537	BRCA1-A complex subunit RAP80	65.6984	42.9018	6.28868	4.89714	45.2411	72.0339	79.8201	37.5912	28.4042	62.7101	5.9446	6.1043	6.81714	4.70383	4.44497	5.54261
ASHGA5P010376	0.000282384	0.00655459	3.4166	up	protein_coding	ENST00000361134	CCDS7038.1	SLC34A3	GENCODE	2124	chr9	+	140125384	140131006		AGGAGGGAGGATCTAGACCTGGGCCTGGGTCTGTCCCTGCCCGAAATCCATGCCGAGTTC	142680	Hs.432442	GO:0006814|GO:0055085|GO:0006811|GO:0006817|GO:0030643|GO:0044341|GO:0031667|GO:0032026|GO:0016021|GO:0005886|GO:0016020|GO:0016324|GO:0031410|GO:0031526|GO:0005903|GO:0015321|GO:0005436	solute carrier family 34 (sodium phosphate), member 3 [Source:HGNC Symbol;Acc:20305]	234.103	94.9376	7.96551	6.19294	233.868	256.283	212.158	102.811	95.7961	86.2057	8.09308	7.73035	8.07308	6.23419	6.32505	6.01959
ASHGA5P050083	0.0121194	0.0491025	3.89979	up	protein_coding	NM_006221	CCDS12220.1	PIN1	RefSeq	1138	chr19	+	9945882	9960365	NR_038422	CTGAGTGAGGGTGGGGAGCCCAGGCCTGGCCTCGGGGCAGGGCAGGGCGGCTAGGCCGGC	5300	Hs.465849	GO:0000413|GO:0001934|GO:0003755|GO:0005515|GO:0005634|GO:0005654|GO:0005737|GO:0006457|GO:0007049|GO:0007088|GO:0016607|GO:0019221|GO:0030496|GO:0030512|GO:0031434|GO:0032321|GO:0032465|GO:0032465|GO:0032480|GO:0032794|GO:0042127|GO:0045087|GO:0050815|GO:0050816|GO:0050816|GO:0051443|GO:0060393|GO:0070373|GO:2000146	peptidyl-prolyl cis-trans isomerase NIMA-interacting 1	41.5998	20.2616	5.6587	3.6953	28.7965	61.8096	34.1932	19.9011	10.8293	30.0543	5.35427	5.90906	5.71277	3.70519	2.96177	4.41895
ASHGA5P017733	1.19602e-05	0.00216313	3.82043	up	protein_coding	NM_001098783	CCDS2888.1	RPP14	RefSeq	3500	chr3	+	58291971	58305920		CCGGCGCGAGGTGTGATCAGCACTGGAAAAGATGCCTGCCCCTGCTGCCACATATGAAAG	11102	Hs.446320	GO:0003723|GO:0004526|GO:0005634|GO:0008033	ribonuclease P protein subunit p14	30285.9	9801.38	14.9942	13.0605	31375.1	31453.8	28028.6	9790.34	9709.99	9903.8	15.0265	14.8661	15.0899	13.0078	13.0639	13.1097
ASHGA5P050884	0.000220445	0.00583783	4.03353	up	protein_coding	NM_001167599	CCDS54441.1	NEU4	RefSeq	2373	chr2	+	242752029	242758739	NM_001167600, NM_001167601, NM_001167602, NM_080741	AGTGGGCCCCGGGAGTCCCCTCCAGCCTCCACTCCTCGGTCCTGGAGTCCACGAACCCCC	129807	Hs.551747	GO:0004308|GO:0005515|GO:0005739|GO:0005764|GO:0005764|GO:0006644|GO:0006665|GO:0006687|GO:0019866|GO:0043202|GO:0044281|GO:0052794|GO:0052795|GO:0052796	sialidase-4 isoform 2	4567.37	1314.49	12.1358	10.1238	4706.8	4564.46	4430.86	1421.12	1302.1	1220.26	12.2539	11.8522	12.3014	10.1775	10.2069	9.98702
ASHGA5P008175	0.00255745	0.0198872	4.36668	up	protein_coding	NM_001146280	CCDS54082.1	SHBG	RefSeq	1069	chr17	+	7533452	7536700		CCAAGATCAAGAGAAGACTCTTCCACCTCTTTTTGCCTGAATGGCCTTTGGGCACAAGGT	6462	Hs.632235	GO:0005497|GO:0005576|GO:0007285|GO:0009914|GO:0042803	sex hormone-binding globulin isoform 3 precursor	1521.28	420.527	10.564	8.43747	1636.44	1385.18	1542.21	456.242	475.062	330.277	10.7748	10.0884	10.8289	8.51565	8.7529	8.04388
ASHGA5P052083	0.000962465	0.0118116	2.8822	up	protein_coding	ENST00000368773	CCDS30862.1	KPRP	GENCODE	2523	chr1	+	152730505	152734529		TTATTTTTAAAGGAAAGGTGACTGAGATAACCCTCTCTCCTGCTCTGAAAATGTTGTTCC	448834	Hs.149386	GO:0006464|GO:0005737|GO:0004835	keratinocyte proline-rich protein [Source:HGNC Symbol;Acc:31823]	1321.54	540.194	10.3679	8.84075	1339.68	1331.26	1293.69	554.885	521.983	543.716	10.5003	10.0244	10.579	8.80614	8.89788	8.81822
ASHGA5P004526	0.000494858	0.0085721	2.0754	up	protein_coding	ENST00000294256	CCDS8097.1	SYVN1	GENCODE	3048	chr11	-	64894750	64902003	NM_172230	CCTCCTTGGGGCCCCCCCGGCCTGCCACTTCAGTCAACTCCACTGAGGAGACTGCCACTA	84447	Hs.731422	GO:0016567|GO:0001701|GO:0030433|GO:0006916|GO:0030968|GO:0006987|GO:0016021|GO:0005634|GO:0005789|GO:0005783|GO:0008270|GO:0005515|GO:0016881	synovial apoptosis inhibitor 1, synoviolin [Source:HGNC Symbol;Acc:20738]	1329.06	749.567	10.3797	9.32627	1341.8	1468.81	1176.57	773.847	709.831	765.022	10.5031	10.1809	10.455	9.30016	9.36089	9.31777
ASHGA5P008657	0.00917811	0.0414242	2.37862	up	protein_coding	NM_022645	CCDS42368.1	CSH2	RefSeq	598	chr17	-	61949371	61951089	NM_022561	TGACACCTACCAGGAGTTTAGGCTGGAAGACGGCAGCCGCCGGACTGGGCAGATCCTCAA	1443	Hs.654515		chorionic somatomammotropin hormone 2 isoform 3 precursor	8.9113	6.09484	3.68584	2.43572	7.82341	8.28921	10.6213	8.28452	5	5	3.62562	3.28827	4.14364	2.61791	2.34646	2.34278
ASHGA5P028076	0.000390614	0.00760466	3.80724	up	protein_coding	NM_144576	CCDS41796.1	COQ10A	RefSeq	1674	chr12	+	56660641	56664750		GGCAGCCGAGCGCTGCTGCCGGCTCTCGCTCAGCCCGGGCGCGCAACCGGCCCCGCCCCC	93058	Hs.4096	GO:0005743	coenzyme Q-binding protein COQ10 homolog A, mitochondrial isoform a	28.3159	14.3753	5.21583	3.28708	31.6259	30.8325	22.4892	13.1403	14.2049	15.7805	5.47736	5.01666	5.15348	3.06865	3.36863	3.42398
ASHGA5P000892	0.000158237	0.00507901	2.22732	up	protein_coding	NM_130760	CCDS12028.1	MADCAM1	RefSeq	1546	chr19	+	496489	505343		GCCATCCCCGTCCTGCACAGCCCGACCTCCCCGGAGCCTCCCGACACCACCTCCCCGGAG	8174	Hs.102598	GO:0005886|GO:0006955|GO:0007155|GO:0007165|GO:0016020|GO:0016021|GO:0050776	mucosal addressin cell adhesion molecule 1 isoform a precursor	6139.94	3137.82	12.5546	11.3993	6207.35	7352.89	4859.57	3499.39	2962.9	2951.17	12.6443	12.5803	12.4392	11.5044	11.3873	11.3063
ASHGA5P043894	1.92591e-05	0.00239831	3.31591	up	protein_coding	NM_001193321	CCDS53464.1	IKBKE	RefSeq	3373	chr1	+	206643585	206670223	NM_014002	GGCCTCGCCGCCTCCCATAGCTCCTTACCCCAGCCCTACACGAAAGGACCTGCTTCTCCA	9641	Hs.321045	GO:0002756|GO:0004672|GO:0004704|GO:0005515|GO:0005524|GO:0005634|GO:0005730|GO:0005737|GO:0005829|GO:0006468|GO:0006955|GO:0008063|GO:0008384|GO:0008630|GO:0010008|GO:0016605|GO:0032480|GO:0034138|GO:0034142|GO:0035666|GO:0038061|GO:0043123|GO:0045087	inhibitor of nuclear factor kappa-B kinase subunit epsilon isoform 3	7762.52	2699.29	12.8991	11.1697	7305.65	9776.8	6205.11	2936.53	2428.06	2733.27	12.8667	13.0164	12.8142	11.2355	11.093	11.1805
ASHGA5P049240	0.00391209	0.0248397	3.73086	up	protein_coding	ENST00000438926	CCDS45491.1	SLC12A3	GENCODE	5567	chr16	+	56899118	56949762	NM_001126107	CAGCGGAGGACGGGAAGGAAGCCAGCGCCAGAGGTGCCAGGCCATCAGTCTCTGGCGCTT	6559	Hs.669115	GO:0006814|GO:0055085|GO:0006811|GO:0006810|GO:0035725|GO:0006821|GO:0071436|GO:0016021|GO:0005886|GO:0016020|GO:0005624|GO:0005887|GO:0016324|GO:0005829|GO:0031982|GO:0005515|GO:0005215|GO:0015377|GO:0015378|GO:0015081	solute carrier family 12 (sodium/chloride transporters), member 3 [Source:HGNC Symbol;Acc:10912]	20.9424	10.679	4.79349	2.89398	14.3059	24.1853	24.3359	15.0955	9.49546	7.44592	4.4277	4.69939	5.25338	3.28453	2.8009	2.5965
ASHGA5P005511	0.000279063	0.00649844	2.45293	up	protein_coding	NM_019055	CCDS8455.1	ROBO4	RefSeq	3859	chr11	-	124754113	124767831		CTCATCATGGGAGGCATGGCTCAGGACTCCCCGCCCCAGATCCTAGTCCACCCCCAGGAC	54538	Hs.524121	GO:0001525|GO:0004872|GO:0009897|GO:0016021|GO:0030154|GO:0030334|GO:0030336	roundabout homolog 4 precursor	1071.04	511.751	10.0494	8.75492	1082.04	1185.65	945.436	537.317	472.352	525.583	10.1879	9.83687	10.1236	8.75662	8.74143	8.7667
ASHGA5P011188	0.00350238	0.0235857	2.62936	up	protein_coding	NM_199077	CCDS7543.1	CNNM2	RefSeq	2076	chr10	+	104678074	104687375		TGCTGGAAGAATTTAAGAAAGAACACACAAACAAGAAACCCAAATCATACCAACACTGAA	54805	Hs.740547	GO:0010960|GO:0015693|GO:0016021|GO:0016323	metal transporter CNNM2 isoform 3	64.103	39.1304	6.21301	4.81829	50.7738	95.5706	45.9647	34.9645	32.5833	49.8433	6.09402	6.46064	6.08436	4.59834	4.66189	5.19465
ASHGA5P054000	0.00338612	0.0232287	3.94418	up	protein_coding	NM_018969	CCDS14349.1	GPR173	RefSeq	4265	chrX	+	53078505	53109796		AACCCTACTGTGTCATGTGAAGCAGGCTGGTAGGCAGACAGGCAGAGAGAAGGTCATGGC	54328	Hs.193011	GO:0004930|GO:0005886|GO:0007165|GO:0016021	probable G-protein coupled receptor 173	30.6497	14.9516	5.28479	3.30507	21.8076	42.2742	27.8673	20.5684	14.1853	10.101	4.98564	5.42712	5.44162	3.75751	3.36605	2.79165
ASHGA5P000901	0.000289119	0.00660441	2.65233	up	protein_coding	NM_174975	CCDS13877.1	SEC14L3	RefSeq	2089	chr22	-	30855215	30868034		CCTGGCCAAGTTCCGAGAAAACGTCCAGGATGTGCTTCCTGCCCTGCCCAACCCTGATGA	266629	Hs.505601	GO:0005215|GO:0005622|GO:0008289|GO:0016021	SEC14-like protein 3 isoform 1	1493.43	652.947	10.5306	9.12334	1509.31	1669.08	1301.91	717.874	627.329	613.639	10.6695	10.3358	10.5864	9.19055	9.18272	8.99674
ASHGA5P001444	0.00156701	0.015104	2.52688	up	protein_coding	NM_020163	CCDS2856.1	SEMA3G	RefSeq	4700	chr3	-	52467267	52479043		ATGGAGATCTCTGTCAAAAGGCAAATGCTATACGTGGGCTCTCGGCTGGGTGTGGCCCAG	56920	Hs.59729	GO:0004872|GO:0005576|GO:0007275|GO:0016020	semaphorin-3G precursor	98.5619	60.8503	6.85461	5.51725	98.1334	103.584	93.9686	66.4311	61.5678	54.5519	6.96935	6.56203	7.03245	5.57076	5.64633	5.33467
ASHGA5P010964	0.00223114	0.0183353	3.46267	up	protein_coding	NM_003029	CCDS1076.1	SHC1	RefSeq	3195	chr1	-	154934773	154946959	NM_001130041	TGAGGCCCTGGACATGAACAAGCTGAGTGGAGGCGGCGGGCGCAGGACTCGGGTGGAAGG	6464	Hs.433795	GO:0000165|GO:0000187|GO:0001525|GO:0001666|GO:0001784|GO:0004713|GO:0005068|GO:0005154|GO:0005158|GO:0005159|GO:0005168|GO:0005515|GO:0005543|GO:0005634|GO:0005759|GO:0005829|GO:0005886|GO:0005886|GO:0006987|GO:0007173|GO:0007176|GO:0007265|GO:0007507|GO:0007568|GO:0007596|GO:0008284|GO:0008286|GO:0008286|GO:0008543|GO:0009636|GO:0010008|GO:0016337|GO:0030168|GO:0030968|GO:0031100|GO:0031175|GO:…	SHC-transforming protein 1 isoform 2	168.249	71.0213	7.49903	5.70715	136.765	234.746	133.236	97.764	62.0299	53.2698	7.40796	7.60849	7.48066	6.16396	5.65658	5.3009
ASHGA5P033436	0.00180433	0.0161791	2.39948	up	protein_coding	NM_212492	CCDS11800.1	GPS1	RefSeq	2363	chr17	+	80009762	80015346		AATGAGGGATAGCTCGGCCCCCAGCTCGGCCTCCTCGTCAGTGACAGATCTGTACTGCAC	2873	Hs.268530	GO:0000188|GO:0005095|GO:0005737|GO:0007049|GO:0007254|GO:0008180|GO:0010388	COP9 signalosome complex subunit 1 isoform 1	699.719	347.996	9.4354	8.17268	738.195	715.182	645.779	365.649	338.576	339.763	9.6339	9.11072	9.56156	8.1759	8.25847	8.08366
ASHGA5P043900	0.00385312	0.0247457	2.00694	up	protein_coding	NM_005631	CCDS5811.1	SMO	RefSeq	3772	chr7	+	128828712	128853385		TACGTCAATGCGTGCTTCTTTGTGGGCAGCATTGGCTGGCTGGCCCAGTTCATGGATGGT	6608	Hs.437846	GO:0000122|GO:0001570|GO:0001649|GO:0001701|GO:0001708|GO:0001755|GO:0001947|GO:0002052|GO:0002053|GO:0003007|GO:0003140|GO:0003323|GO:0004930|GO:0005113|GO:0005515|GO:0005737|GO:0005794|GO:0005886|GO:0005886|GO:0005901|GO:0005929|GO:0007224|GO:0007224|GO:0007228|GO:0007283|GO:0007368|GO:0007371|GO:0007494|GO:0008144|GO:0008406|GO:0009611|GO:0010002|GO:0010628|GO:0010629|GO:0016021|GO:0017147|GO:…	smoothened homolog precursor	15.9334	16.1574	4.45645	3.45145	13.938	18.9258	14.9365	16.1266	13.0171	19.3285	4.3908	4.37916	4.59939	3.3781	3.23431	3.74195
ASHGA5P016108	0.00142527	0.014433	2.72947	up	protein_coding	NM_001025930	CCDS43048.1	TTLL3	RefSeq	3662	chr3	+	9851643	9878040		TCTGGGGAAGCCCGTCACCACTTCCCCAGCCTCCACACCAAGGCCCAGCTGCCTTCTCCC	26140	Hs.726435	GO:0004835|GO:0005737|GO:0005874|GO:0005929|GO:0015630|GO:0018094|GO:0035082|GO:0035085|GO:0042384|GO:0070735|GO:0070736	tubulin monoglycylase TTLL3	506.171	231.078	8.99541	7.54679	521.205	507.375	489.935	251.485	217.536	224.213	9.16164	8.64011	9.18448	7.59909	7.59415	7.44713
ASHGA5P018185	0.0237003	0.0760224	2.83011	up	protein_coding	ENST00000450318	CCDS45235.1	NUSAP1	GENCODE	2300	chr15	+	41624925	41673245	NM_001243144	TCTGCTGCTGGAAAGCTAAAACCATGGGGGCAATCTAAAGAAAATAATTATCTAAATCAA	51203	Hs.615092		nucleolar and spindle associated protein 1 [Source:HGNC Symbol;Acc:18538]	2049.4	828.102	10.8743	9.3734	1341.71	3333.81	1472.67	1113.52	462.39	908.394	10.5027	11.3536	10.7665	9.83855	8.71326	9.56838
ASHGA5P015384	0.000501854	0.00865527	4.14303	up	protein_coding	NM_001142958	CCDS45884.1	FBXO15	RefSeq	1739	chr18	-	71740587	71815100		TTGGGTGCAGAAAGGGGCCAGGGGTCAAGCTTTCTGCAGGCTCTGCTGCCCTGAGGTGCC	201456	Hs.664011	GO:0019005	F-box only protein 15 isoform 2	90.4244	35.1998	6.73283	4.68215	79.0489	92.6097	99.6148	37.9353	33.2691	34.395	6.67784	6.42148	7.09918	4.71876	4.69394	4.63374
ASHGA5P054493	0.0158549	0.0581802	2.10544	up	protein_coding	NM_172171	CCDS7338.1	CAMK2G	RefSeq	3818	chr10	-	75572258	75634349		GGAATGGCAGCTCGGTGCCTGAAGGACGGAGCTCCCGGGACAGAACAGCCCCCTCTGCAG	818	Hs.523045	GO:0000082|GO:0001666|GO:0004683|GO:0004723|GO:0005516|GO:0005524|GO:0005654|GO:0005829|GO:0005886|GO:0005954|GO:0006468|GO:0006816|GO:0006979|GO:0007268|GO:0007399|GO:0014733|GO:0019221|GO:0030073|GO:0030154|GO:0030666|GO:0033017|GO:0046777|GO:0051924|GO:0060333	calcium/calmodulin-dependent protein kinase type II subunit gamma isoform 1	771.905	434.962	9.57739	8.50327	816.593	715.993	783.13	450.701	468.377	385.808	9.77678	9.11213	9.84327	8.49507	8.7323	8.28244
ASHGA5P021095	0.00399328	0.0251441	4.10234	up	protein_coding	NM_001029865		DBX1	RefSeq	1032	chr11	-	20177759	20181870		GAAAGACTCGCAGGTGAAAATCTGGTTCCAGAACCGACGCATGAAATGGCGGAACTCCAA	120237	Hs.558604	GO:0000976|GO:0003700|GO:0005634|GO:0007275	homeobox protein DBX1	18.0315	5.96975	4.47424	2.43779	9.35092	29.9459	14.7976	5	5	7.90924	3.85661	4.97856	4.58755	2.34074	2.34646	2.62616
ASHGA5P010149	2.0073e-05	0.0024143	5.22959	up	protein_coding	NM_020393	CCDS30871.1	PGLYRP4	RefSeq	1853	chr1	-	153302596	153321022		TTGAGAACATCTCCCAGCTCACTGAAAAAGGCCTTCCCACAGATGTCTCCACCACGGTCT	57115	Hs.58356	GO:0005576|GO:0005622|GO:0008270|GO:0008745|GO:0009253|GO:0016019|GO:0016020|GO:0016045|GO:0032689|GO:0032827|GO:0042834|GO:0044117|GO:0045087|GO:0050830	peptidoglycan recognition protein 4 precursor	1249.95	282.985	10.2453	7.85861	982.16	1670.88	1096.81	305.711	256.138	287.107	10.0455	10.3379	10.3525	7.90247	7.83839	7.83498
ASHGA5P008268	0.0109145	0.0461207	2.37695	up	protein_coding	NM_032184	CCDS44169.1	SYDE2	RefSeq	4711	chr1	-	85623355	85666728		ATGGAAATTGAAAAGAGAGGCTGTCAGGTAGTAGGCCTGTATCGATTATGTGGTTCGGCA	84144	Hs.670497	GO:0005100|GO:0005829|GO:0007264|GO:0032862|GO:0051056	rho GTPase-activating protein SYDE2	20.4881	15.806	4.67186	3.42275	14.0367	33.9148	13.5129	18.3976	16.185	12.8353	4.40105	5.1386	4.47594	3.57614	3.56936	3.12276
ASHGA5P007180	0.000482394	0.00847524	3.98912	up	protein_coding	ENST00000329125	CCDS54068.1	GP1BA	GENCODE	2501	chr17	+	4835591	4838325		AAGACGCTCTGTGCCTTCGGAGGTCTTTCTGCCTGCCTGTCCTCATGCCTCTCCTCCTCT	2811	Hs.1472	GO:0000902|GO:0007155|GO:0042730|GO:0007166|GO:0030168|GO:0007596|GO:0007599|GO:0030193|GO:0070493|GO:0007597|GO:0005886|GO:0016020|GO:0005887|GO:0031362|GO:0005515|GO:0015057	glycoprotein Ib (platelet), alpha polypeptide [Source:HGNC Symbol;Acc:4439]	4196.52	1230.17	12.012	10.0159	4481.41	4370.88	3737.26	1364.04	1304.34	1022.14	12.1836	11.7786	12.0738	10.1145	10.2101	9.72309
ASHGA5P003254	0.00883789	0.0404719	2.25811	up	protein_coding	NM_001606	CCDS43909.1	ABCA2	RefSeq	8171	chr9	-	139901685	139922740		TGGAAGAACGTGACGCTCAAACGCCGGAGCCCGTGGGTCCTGGCCTTCGAGATCTTCATC	20	Hs.421202	GO:0000166|GO:0005524|GO:0005524|GO:0005764|GO:0005765|GO:0005768|GO:0005815|GO:0006200|GO:0006357|GO:0006629|GO:0006810|GO:0016021|GO:0016021|GO:0016023|GO:0016887|GO:0032383|GO:0042493|GO:0042626|GO:0042632|GO:0043190|GO:0048545	ATP-binding cassette sub-family A member 2 isoform a	30.2417	25.4397	5.31326	4.13814	31.626	32.44	26.6591	28.9774	17.7174	29.6244	5.4775	5.08028	5.38201	4.30509	3.71093	4.3984
ASHGA5P009676	4.08084e-05	0.00291046	3.8874	up	protein_coding	NM_001042376	CCDS41598.1	INS-IGF2	RefSeq	847	chr11	-	2167852	2182439	NR_003512	GACCTGCAGGCCTCAGCTTTGTCCCTCTCCTCCTCCACGTCAACCTGGCCAGAGGGTCTG	723961			insulin- insulin-like growth factor 2 read-through product precursor	19188.8	5868	14.2625	12.3036	19673.8	19920.4	17972.3	6289.26	5891.98	5422.77	14.3083	14.0981	14.3809	12.3518	12.3631	12.1961
ASHGA5P046829	6.90834e-05	0.00350444	11.4644	up	protein_coding	NM_001039567	CCDS44028.1	RPS4Y2	RefSeq	888	chrY	+	22917953	22942918		ACTTCCTCAAAATTGATGGCAAGGTTCGAGTGGACATCACATACCCTGCTGGATTCATAG	140032	Hs.367761	GO:0003735|GO:0005840|GO:0006412|GO:0019843	40S ribosomal protein S4, Y isoform 2	3240.46	325.826	11.5724	8.05331	2687.46	4664.15	2369.78	353.434	247.994	376.05	11.4331	11.8805	11.4036	8.12825	7.7881	8.24357
ASHGA5P055175	0.000272551	0.00643697	2.08457	up	protein_coding	NM_006760	CCDS8404.1	UPK2	RefSeq	947	chr11	+	118827007	118829269		CAGGAACCCCAGCCTGCCAGCACCTATTCCACCTCCCAGCCCAGCATGGCACCCCTGCTG	7379	Hs.379613	GO:0005887|GO:0007275|GO:0016044|GO:0016324|GO:0030176|GO:0030855	uroplakin-2 precursor	1973.82	1086.98	10.9157	9.85598	1970.29	2400.36	1550.82	1151.36	1082.15	1027.42	11.0303	10.8835	10.8334	9.88621	9.95074	9.73099
ASHGA5P002469	2.56212e-05	0.00259941	4.44361	up	protein_coding	NM_001333	CCDS6723.1	CTSL2	RefSeq	4542	chr9	-	99791958	99801592		ACGGCTGCTGGTTTTGAAACATGAATCTTTCGCTCGTCCTGGCTGCCTTTTGCTTGGGAA	1515	Hs.610096	GO:0004177|GO:0004197|GO:0005902|GO:0006508|GO:0007283|GO:0008234|GO:0009267|GO:0009749|GO:0009897|GO:0010259|GO:0014070|GO:0019886|GO:0021675|GO:0030141|GO:0030984|GO:0034698|GO:0042277|GO:0043005|GO:0043202|GO:0043204|GO:0045177|GO:0046697|GO:0048102|GO:0051384|GO:0060008	cathepsin L2 preproprotein	1089.23	293.456	10.061	7.90923	919.175	1398.95	949.557	335.894	248.337	296.138	9.94049	10.1081	10.1343	8.05378	7.79033	7.88358
ASHGA5P028002	0.00185791	0.0164953	2.33156	up	protein_coding	NM_181711	CCDS8817.1	GRASP	RefSeq	1950	chr12	+	52400747	52409671		CACCCTGCCGAGCTGTACCGCGCGCTCGCCGTGTCCGGGGGCACCCTGCCCCGCCGAAAG	160622	Hs.407202	GO:0005886|GO:0007165|GO:0008104|GO:0030054|GO:0030165|GO:0030306|GO:0045211|GO:0048471	general receptor for phosphoinositides 1-associated scaffold protein	192.886	115.282	7.70753	6.48623	187.353	208.475	182.829	128.916	114.073	102.858	7.80212	7.44069	7.87977	6.57424	6.59356	6.29088
ASHGA5P036488	0.013559	0.0529281	2.2912	up	protein_coding	NM_020864	CCDS46529.1	NYAP2	RefSeq	4590	chr2	+	226265601	226518734		TCAGAGACAGTCAGCAGCACTGCAGCCAGTAAGAGCGGGAAAACCCCTGAGAGGACTGAA	57624	Hs.224409	GO:0014065|GO:0048812	neuronal tyrosine-phosphorylated phosphoinositide-3-kinase adapter 2	16.3543	14.4912	4.48563	3.28953	13.0124	15.862	20.1884	16.0367	11.8856	15.5514	4.29846	4.14736	5.01108	3.36972	3.09365	3.40523
ASHGA5P039150	0.000370273	0.00745027	2.77228	up	protein_coding	NM_002740	CCDS3212.2	PRKCI	RefSeq	4884	chr3	+	169940219	170023770		TGCCGACCCAGAGGGACAGCAGCACCATGTCCCACACGGTCGCAGGCGGCGGCAGCGGGG	5584	Hs.478199	GO:0000133|GO:0004672|GO:0004674|GO:0004674|GO:0004697|GO:0005515|GO:0005524|GO:0005543|GO:0005634|GO:0005768|GO:0005829|GO:0005829|GO:0005886|GO:0006468|GO:0006612|GO:0007010|GO:0007015|GO:0008270|GO:0010976|GO:0016044|GO:0016192|GO:0016324|GO:0032869|GO:0034329|GO:0034351|GO:0035089|GO:0035556|GO:0042462|GO:0043220|GO:0043524|GO:0045197|GO:0045216|GO:0045216|GO:0046326|GO:0046903|GO:0048011|GO:…	protein kinase C iota type	26.1544	18.25	5.11978	3.64871	23.7134	29.6835	25.0664	19.42	15.2937	20.0362	5.09953	4.96547	5.29434	3.66538	3.48284	3.7979
ASHGA5P046337	3.21882e-05	0.00269605	22.6595	up	protein_coding	ENST00000310125	CCDS14636.2	TFDP3	GENCODE	1680	chrX	-	132350696	132352376		CCTGAGTTTACTGAAGAAATTGTACTTCATCCACATCCATGAAAATAAAATGCTCTCCTT	51270	Hs.142908	GO:0006351|GO:0006355|GO:0006974|GO:0000082|GO:0005667|GO:0005737|GO:0003677|GO:0003700|GO:0046982	transcription factor Dp family, member 3 [Source:HGNC Symbol;Acc:24603]	712.013	42.0817	9.44528	4.94323	601.029	889.113	645.896	38.0449	51.2098	36.9905	9.35292	9.42072	9.5622	4.72279	5.36018	4.74673
ASHGA5P047661	0.00380773	0.0246291	3.11515	up	protein_coding	NM_001077494	CCDS41564.1	NFKB2	RefSeq	3123	chr10	+	104154336	104162286	NM_001261403, NM_002502, NR_048560	TGCACTGCTTCAGAGTGGAGCTCCTGCTGTGCCCCAGCTGTTGCATATGCCTGACTTTGA	4791	Hs.73090	GO:0002224|GO:0002268|GO:0002467|GO:0002755|GO:0002756|GO:0003677|GO:0003700|GO:0003713|GO:0005515|GO:0005634|GO:0005654|GO:0005730|GO:0005737|GO:0005829|GO:0006351|GO:0006355|GO:0008063|GO:0030198|GO:0032481|GO:0033257|GO:0034130|GO:0034134|GO:0034138|GO:0034142|GO:0035666|GO:0045087|GO:0048536|GO:0051092	nuclear factor NF-kappa-B p100 subunit isoform a	926.722	355.613	9.83623	8.19693	1020.37	863.242	896.554	395.02	369.143	302.676	10.0991	9.37265	10.0369	8.28885	8.38139	7.92054
ASHGA5P042299	0.0141527	0.0543908	3.19597	up	protein_coding	ENST00000244519	CCDS4611.1	BTN3A3	GENCODE	3002	chr6	+	26440699	26453643	NM_197974	TTCTTGTGGAGACAACAGAAGGAAAAAATTGCTCTGTCCAGGGAGACAGAAAGAGAGCGA	10384	Hs.167741	GO:0016021|GO:0005515	butyrophilin, subfamily 3, member A3 [Source:HGNC Symbol;Acc:1140]	260.458	100.053	7.90866	6.2324	161.03	482.287	138.056	91.6904	75.0317	133.437	7.61845	8.57903	7.52849	6.06605	5.95862	6.67254
ASHGA5P005247	0.0399473	0.108076	2.16381	up	protein_coding	NM_002246	CCDS1727.1	KCNK3	RefSeq	3978	chr2	+	26915580	26954066		ACCACCATCGGCTACGGGCACGCGGCACCCAGCACGGATGGCGGCAAGGTGTTCTGCATG	3777	Hs.645288	GO:0005252|GO:0005267|GO:0005886|GO:0005887|GO:0006813|GO:0007268|GO:0007420|GO:0008022|GO:0042493|GO:0042803|GO:0046982|GO:0051481|GO:0071294|GO:0071456|GO:0090102	potassium channel subfamily K member 3	9.80307	8.01841	3.77216	2.65858	6.29438	9.75021	13.3646	7.48174	5.49466	11.0788	3.35066	3.50256	4.46325	2.57022	2.49405	2.91147
ASHGA5P049964	0.00172092	0.0157576	2.38635	up	protein_coding	NM_006553	CCDS11860.1	SLMO1	RefSeq	1731	chr18	+	12407894	12432236	NM_001142405	CGCGCGGCCCGAAGCACCCGGCCCGGATCGCAGAGCCCGCGCCCTGCGCCGGCGGCAATG	10650	Hs.514718	GO:0005739	protein slowmo homolog 1 isoform 1	20.5373	16.5337	4.75639	3.50158	20.5954	27.1244	13.8919	16.9346	17.7913	14.8752	4.9125	4.84783	4.50883	3.44712	3.7173	3.34032
ASHGA5P007624	0.000338244	0.00706227	2.50374	up	protein_coding	NM_181799	CCDS13371.1	UBE2C	RefSeq	766	chr20	+	44441254	44445596		AGCTTACTCTGCAACTGTTTCTCCAAATGCCAGAACCCAACATTGATAGTCCCTTGAACA	11065	Hs.93002	GO:0000075|GO:0000278|GO:0004842|GO:0004842|GO:0005515|GO:0005524|GO:0005654|GO:0005680|GO:0005829|GO:0006511|GO:0007049|GO:0007051|GO:0007067|GO:0007094|GO:0008054|GO:0010458|GO:0010994|GO:0016567|GO:0031145|GO:0031145|GO:0031536|GO:0048015|GO:0051301|GO:0051436|GO:0051437|GO:0051439|GO:0051488|GO:0070936|GO:0070979	ubiquitin-conjugating enzyme E2 C isoform 2	825.433	382.746	9.63946	8.31538	806.041	1046.72	623.537	362.91	349.098	436.23	9.75798	9.65028	9.51013	8.16413	8.30213	8.47988
ASHGA5P035231	0.000204783	0.00568082	3.83515	up	protein_coding	NM_001123363	CCDS46388.1	RGPD6	RefSeq	7640	chr2	-	111271378	111336309	NM_001037866, NM_001164463	CGCACGCTCGTCACAGTGGGCCTCCGCCGGCTACGCCGCTGCTTCAGTGGCTTGCAGGCA	729540	Hs.645445	GO:0000042|GO:0005737	RANBP2-like and GRIP domain-containing protein 5/6 isoform 1	584.363	190.454	9.18969	7.25041	577.191	625.028	550.87	188.23	169.441	213.691	9.29827	8.92212	9.34869	7.16207	7.2107	7.37846
ASHGA5P037328	0.000101311	0.00413864	3.24338	up	protein_coding	NM_001135099	CCDS54486.1	TMPRSS2	RefSeq	3250	chr21	-	42836477	42879992		GGGCTGGGGAGGGGAACCTGGGCGCCTGGGACCCGCCGATGCCCCCTGCCCCGCCCGGAG	7113	Hs.439309	GO:0004252|GO:0005044|GO:0005576|GO:0005737|GO:0005886|GO:0005887|GO:0006508|GO:0008236	transmembrane protease serine 2 isoform 1	3153.76	1105.44	11.5775	9.87997	3335.1	3410.32	2715.86	1102.87	1028.12	1185.34	11.7442	11.3861	11.6021	9.82046	9.88078	9.93866
ASHGA5P052889	0.00191269	0.0167593	2.21208	up	protein_coding	NM_019041	CCDS5243.1	MTRF1L	RefSeq	3878	chr6	-	153308399	153323925	NM_001114184	CGGACTAAGGATGCGGTCCCGGGTTCTGTGGGGCGCTGCCCGGTGGCTCTGGCCCCGCCG	54516	Hs.225836	GO:0005739|GO:0016149	peptide chain release factor 1-like, mitochondrial isoform a	113.506	77.9651	7.03375	5.88834	109.141	122.12	109.258	83.9529	65.0191	84.9233	7.11716	6.76798	7.21611	5.93475	5.73225	5.99803
ASHGA5P019430	1.06633e-05	0.00216313	5.88178	up	protein_coding	NM_001193308	CCDS53286.1	SYTL1	RefSeq	1989	chr1	+	27668482	27680423		GGAGACTGAGGGACCTGATTTCCCATCGCCTTCTGTCCCCCTAAAGGCTTCAGATCCTGA	84958	Hs.469175	GO:0005515|GO:0005886|GO:0006886|GO:0006887|GO:0017137|GO:0019897|GO:0042043|GO:0042470	synaptotagmin-like protein 1 isoform 1	4016.94	788.239	11.9439	9.38761	3955.22	4785.41	3310.17	796.657	664.828	903.232	12.0125	11.9144	11.9047	9.34192	9.2651	9.55583
ASHGA5P007402	0.00242595	0.0192199	3.23378	up	protein_coding	NM_024426	CCDS7878.2	WT1	RefSeq	3037	chr11	-	32409321	32457081	NM_001198552	AGGTAAAACAAGTGAAAAGCCCTTCAGCTGTCGGTGGCCAAGTTGTCAGAAAAAGTTTGC	7490	Hs.591980	GO:0000122|GO:0001077|GO:0001570|GO:0001657|GO:0001658|GO:0001822|GO:0003156|GO:0003690|GO:0003700|GO:0003700|GO:0003723|GO:0005515|GO:0005634|GO:0005654|GO:0005730|GO:0005737|GO:0006355|GO:0006355|GO:0006357|GO:0006917|GO:0007281|GO:0007356|GO:0007507|GO:0007530|GO:0008270|GO:0008285|GO:0008380|GO:0008406|GO:0008584|GO:0009888|GO:0016607|GO:0017148|GO:0030308|GO:0030325|GO:0030539|GO:0030855|GO:…	Wilms tumor protein isoform D	56.8036	30.5676	6.13241	4.43919	61.9657	56.7443	51.701	37.2696	30.1275	24.3057	6.35972	5.79847	6.23904	4.6912	4.53766	4.0887
ASHGA5P048901	0.000390459	0.00760466	2.10441	up	protein_coding	NM_018671	CCDS10367.1	UNC45A	RefSeq	3585	chr15	+	91478214	91497323		CTCTCCGCGATGACTGTGAGTGGTCCAGGGACCCCCGAGCCCCGGCCGGCCACCCCCGGG	55898	Hs.389461	GO:0005634|GO:0007517|GO:0030154|GO:0048471|GO:0051879|GO:0061077	protein unc-45 homolog A isoform 2	116.98	82.6213	7.06561	5.99219	114.195	135.844	100.9	84.4477	82.0735	81.3426	7.17787	6.90456	7.11439	5.94586	6.0965	5.93421
ASHGA5P054829	0.000612792	0.00948197	4.68294	up	protein_coding	NM_152264	CCDS7934.1	SLC39A13	RefSeq	2429	chr11	+	47430045	47438051		TGGCCTTTTGTGTTTTTCAGTACGTGGCATGCCTGGATGTCCCTGCCCTGGCTGTGGCAT	91252	Hs.523664	GO:0005385|GO:0005385|GO:0005794|GO:0005794|GO:0006882|GO:0006882|GO:0016021|GO:0030173|GO:0042803|GO:0048471|GO:0061448|GO:0071577|GO:0071577	zinc transporter ZIP13 isoform b precursor	3098.15	754.478	11.5583	9.33084	3371.04	2852.38	3071.03	784.148	770.883	708.404	11.758	11.1335	11.7832	9.31975	9.47821	9.19456
ASHGA5P002397	0.00286973	0.0212444	2.65142	up	protein_coding	NM_016289	CCDS2478.1	CAB39	RefSeq	3846	chr2	+	231577556	231685790		GCCCAGCCCCGTAGCACAGGCGGAGTGCAGCGGAGGCCCCTGCCGCTGCCGTCATGCCGT	51719	Hs.603930	GO:0004674|GO:0005515|GO:0005829|GO:0007050|GO:0008286|GO:0019900|GO:0030295|GO:0043234|GO:0045860|GO:0046320|GO:0051291	calcium-binding protein 39	664.085	299.125	9.35269	7.94592	755.89	638.225	598.139	310.968	291.943	294.463	9.65787	8.94799	9.4522	7.93051	8.03361	7.87364
ASHGA5P053228	0.00038132	0.00752711	2.0425	up	protein_coding	NM_005273	CCDS5703.1	GNB2	RefSeq	1681	chr7	+	100271362	100276792		CCCCGTCCCGCGGCCCCCAGCCGCCCCCAACCCTGCCCCACGGGCCCGGCGCCATGAGTG	2783	Hs.185172	GO:0003924|GO:0004871|GO:0005246|GO:0005515|GO:0005886|GO:0006112|GO:0006184|GO:0007186|GO:0007204|GO:0007268|GO:0031702|GO:0043234|GO:0044281|GO:0048471|GO:0051020|GO:0071377	guanine nucleotide-binding protein G(I)/G(S)/G(T) subunit beta-2	8997.2	5084.21	13.1202	12.0899	9057.3	10776.3	7158.06	5105.21	4539.89	5607.55	13.1799	13.1487	13.032	12.0365	11.9829	12.2503
ASHGA5P015164	0.00043078	0.00793056	13.5713	up	protein_coding	NM_001137604	CCDS46395.1	POLR1B	RefSeq	5259	chr2	+	113299491	113334727		CGCGGTGCAGGCTGATATCAACTGGGCAGTGAATGGAATCTCAAAAGGAATCATTAAGCA	84172	Hs.86337	GO:0003677|GO:0003899|GO:0005515|GO:0005654|GO:0005730|GO:0005737|GO:0006360|GO:0006361|GO:0006362|GO:0006363|GO:0010467|GO:0032549|GO:0046872	DNA-directed RNA polymerase I subunit RPA2 isoform 2	65.5112	5	6.10581	2.34333	51.8704	115.813	28.8498	5	5	5	6.12338	6.70535	5.48872	2.34074	2.34646	2.34278
ASHGA5P008429	2.8472e-05	0.00268899	6.35165	up	protein_coding	NM_181892	CCDS3661.1	UBE2D3	RefSeq	2623	chr4	-	103717132	103748340		GCACGGATCTATAAAACAGACAGAGATAAGTACAATAGGTTAGCAAGAGAGTGGACAGAG	7323	Hs.518773	GO:0000122|GO:0000209|GO:0004842|GO:0005515|GO:0005524|GO:0005654|GO:0005829|GO:0005886|GO:0006281|GO:0006351|GO:0006367|GO:0006464|GO:0006511|GO:0006513|GO:0006915|GO:0007179|GO:0010008|GO:0010467|GO:0016567|GO:0030509|GO:0032480|GO:0033554|GO:0043161|GO:0045087|GO:0061418|GO:0070936|GO:0070979|GO:0071456	ubiquitin-conjugating enzyme E2 D3 isoform 2	12529.1	2285.13	13.5922	10.9251	10954.4	15545.9	11086.9	2461.15	2327.98	2066.27	13.4228	13.7074	13.6464	10.987	11.0408	10.7475
ASHGA5P033783	0.00611326	0.0322381	2.15202	up	protein_coding	NM_138375	CCDS42418.1	CABLES1	RefSeq	4307	chr18	+	20735788	20840434		CCTTCCTTGAATGCTTTCTAAGAGGGGCTGCCATGCAAGAATATATGCTGATTTTCCCAT	91768	Hs.11108	GO:0005634|GO:0005829|GO:0007049|GO:0007399|GO:0007596|GO:0016538|GO:0051301|GO:0051302|GO:0051726	CDK5 and ABL1 enzyme substrate 1 isoform 1	32.4836	27.7671	5.40066	4.29497	26.3833	37.1353	33.9321	34.5116	24.273	24.5166	5.24419	5.25509	5.70268	4.57696	4.20681	4.10113
ASHGA5P013845	0.000314721	0.00685598	2.12749	up	protein_coding	NM_001080409		ZNF99	RefSeq	7881	chr19	-	22934984	22966973	NM_001242680	AAACCCCCAGTTATTAGTTCTCATTTTACACAAGACTTTTGGCCAGATCAGAGCATAAAA	7652	Hs.568380	GO:0003677|GO:0005634|GO:0006351|GO:0006355|GO:0008270	zinc finger protein 99	215.015	136.532	7.83595	6.7468	188.713	272.238	184.096	146.989	137.439	125.167	7.80787	7.81141	7.88856	6.7823	6.88196	6.57612
ASHGA5P048539	0.000157041	0.00506517	2.65827	up	protein_coding	NM_032714	CCDS41999.1	INF2	RefSeq	1719	chr14	+	105155942	105171145		CTCGCCTGCGGTGAGTCCCCACTGTAGCGGTCCTGCCGGCTCCCCCTCCTGCTCCCAAGG	64423	Hs.24956	GO:0003779|GO:0005634|GO:0005737|GO:0005783|GO:0017048|GO:0030036|GO:0048471	inverted formin-2 isoform 3	10763.8	4661.06	13.3803	11.9698	11308.4	10982.1	10000.9	4992.7	4549.07	4441.39	13.4762	13.1837	13.4808	12.0011	11.9909	11.9174
ASHGA5P050541	0.00621263	0.0325309	2.74922	up	protein_coding	NM_015727	CCDS46345.1	TACR1	RefSeq	1732	chr2	-	75278162	75426645		TCAATGACAGGTGAGGATCCCAACCCCATGAGCTCTCCAGGGGCCACAAGACCATCTACA	6869	Hs.633301	GO:0002118|GO:0002526|GO:0004995|GO:0005515|GO:0005737|GO:0005886|GO:0005886|GO:0005887|GO:0006954|GO:0007200|GO:0007204|GO:0007217|GO:0007610|GO:0007616|GO:0007638|GO:0008306|GO:0009408|GO:0009582|GO:0009725|GO:0009986|GO:0010193|GO:0010634|GO:0010996|GO:0016496|GO:0019233|GO:0030425|GO:0032224|GO:0032230|GO:0035094|GO:0035106|GO:0035815|GO:0042713|GO:0042755|GO:0043278|GO:0045471|GO:0045760|GO:…	substance-P receptor isoform short	2105.2	892.926	11.0114	9.55237	2416.53	2058.13	1840.93	913.845	1053.86	711.073	11.2955	10.6608	11.0779	9.54979	9.90852	9.19879
ASHGA5P045798	0.00366474	0.0241448	2.33627	up	protein_coding	NM_001001709	CCDS35058.1	C9orf170	RefSeq	3409	chr9	+	89763558	89774641		GCAAGGCCCGGGCGGGGAGGCCTGGCCTCCTGCTCAGTCGGTGCAAATGGAAAAAGAGAC	401535	Hs.657740		uncharacterized protein C9orf170 precursor	64.7258	45.4913	6.30239	5.07819	59.5193	64.0698	70.5882	46.4397	43.1833	46.851	6.30327	5.95688	6.64703	5.02726	5.10373	5.10358
ASHGA5P040157	0.000276451	0.0064585	2.5817	up	protein_coding	NM_005900	CCDS3765.1	SMAD1	RefSeq	3056	chr4	+	146402950	146480325	NM_001003688	TCTCAGCCGATGGACACAAACATGATGGCGCCTCCCCTGCCCTCAGAAATCAACAGAGGA	4086	Hs.604588	GO:0000165|GO:0000979|GO:0001657|GO:0001710|GO:0001822|GO:0002051|GO:0003700|GO:0005057|GO:0005515|GO:0005622|GO:0005634|GO:0005634|GO:0005634|GO:0005637|GO:0005654|GO:0005667|GO:0005737|GO:0005829|GO:0006351|GO:0006468|GO:0006954|GO:0007165|GO:0007179|GO:0007183|GO:0007276|GO:0008285|GO:0009880|GO:0010243|GO:0010628|GO:0016021|GO:0019901|GO:0030509|GO:0030509|GO:0030509|GO:0030509|GO:0030618|GO:…	mothers against decapentaplegic homolog 1	13416.1	6052.38	13.7207	12.3524	14103.1	13575.9	12569.4	6341.85	6035.09	5780.19	13.8171	13.5018	13.8433	12.364	12.3993	12.294
ASHGA5P054765	0.000575167	0.00917297	3.65494	up	protein_coding	NM_001098520	CCDS44553.1	HTATIP2	RefSeq	1509	chr11	+	20385288	20405329		GGCGGCTGCTCTGGCGGCCGCCCTGCTCCTGCTGCGTCGTGAGGACCCGGGGCCGGGGGC	10553	Hs.90753	GO:0000166|GO:0001525|GO:0003713|GO:0005515|GO:0005634|GO:0005635|GO:0005737|GO:0006357|GO:0006915|GO:0006917|GO:0016491|GO:0019048|GO:0030154|GO:0042981|GO:0045765|GO:0051170	oxidoreductase HTATIP2 isoform a precursor	925.36	303.273	9.83201	7.96216	929.122	959.298	887.659	321.132	311.139	277.549	9.95585	9.51688	10.0233	7.97878	8.128	7.77972
ASHGA5P013670	0.00420251	0.0258515	2.70167	up	protein_coding	NM_207033	CCDS13478.1	EDN3	RefSeq	2617	chr20	+	57875498	57901047		ACGTCAGCAGACAGGTTGAAGTCAAGGACCAACAAAGCAAGCAGGCTTTAGACCTCCACC	1908	Hs.1408	GO:0001755|GO:0002690|GO:0003100|GO:0005102|GO:0005179|GO:0005576|GO:0005615|GO:0007165|GO:0007166|GO:0007267|GO:0007275|GO:0008015|GO:0008284|GO:0010460|GO:0014824|GO:0014826|GO:0019229|GO:0030072|GO:0030182|GO:0030318|GO:0030593|GO:0042310|GO:0043406|GO:0045840|GO:0046887|GO:0046888|GO:0046928|GO:0048016|GO:0048070	endothelin-3 isoform 3 preproprotein	14.3096	9.58103	4.20936	2.77551	11.7237	22.7245	8.48061	9.72105	10.9539	8.06811	4.15765	4.61492	3.85552	2.71037	2.97997	2.63619
ASHGA5P012097	9.00605e-05	0.00399632	11.5059	up	protein_coding	ENST00000375707	CCDS31662.1	CARD17	GENCODE	466	chr11	-	104963195	104972158		TTCCTTCCTAGGTTCAACTTTCATTTGAGCAGCCAGATGATAAAGCACAGATGCCCAGCA	440068	Hs.732627	GO:0006508|GO:0042981|GO:0005737|GO:0005622|GO:0005515|GO:0004869|GO:0004197	caspase recruitment domain family, member 17 [Source:HGNC Symbol;Acc:33827]	266.378	33.9484	8.14029	4.61598	284.309	270.175	244.65	38.7281	34.5692	28.5477	8.35718	7.79885	8.26483	4.75059	4.75628	4.34108
ASHGA5P011634	0.0269603	0.0830867	3.02167	up	protein_coding	NM_032799	CCDS6909.1	ZDHHC12	RefSeq	1184	chr9	-	131483148	131486408		CACGATACCGAGCTGCGGCAATGGGAGGAGCAGGGGGAGCTGCTCCTGCCCCTCACCTTC	84885	Hs.133122	GO:0008270|GO:0016021|GO:0016746	probable palmitoyltransferase ZDHHC12	72.9916	43.6943	6.44994	4.8546	67.9672	87.5067	63.5009	28.0281	30.2667	72.788	6.48627	6.35174	6.51181	4.24918	4.54632	5.76829
ASHGA5P054143	1.37061e-05	0.00220806	12.5096	up	protein_coding	NM_012317	CCDS14672.1	LDOC1	RefSeq	1388	chrX	-	140269930	140271310		TCCTTCCAGGCCGTTCGCAATGGTGGATGAGTTGGTGCTGCTGCTGCACGCGCTCCTGAT	23641	Hs.45231	GO:0005515|GO:0005634|GO:0008285	protein LDOC1	2010.52	199.021	10.9587	7.31372	1853.53	2175.35	2002.67	213.852	169.264	213.946	10.9474	10.7364	11.1922	7.35368	7.20823	7.37925
ASHGA5P031452	3.79271e-05	0.00286214	9.55032	up	protein_coding	NM_020825	CCDS10440.2	CRAMP1L	RefSeq	7702	chr16	+	1664640	1727909		CTGAAGGTGGTGGATCATCGTCTGGAAATGTGTCTGGGGTTGCCCCTGCTGCCCCTGCAG	57585	Hs.603676	GO:0003677|GO:0003682|GO:0005634	protein cramped-like	4062.04	496.399	11.9637	8.70813	4193.94	4000.58	3991.59	532.882	452.454	503.862	12.0811	11.6421	12.1679	8.7459	8.67924	8.69924
ASHGA5P009919	2.82018e-05	0.00268756	2.47852	up	protein_coding	NM_004018	CCDS14232.1	DMD	RefSeq	4552	chrX	-	31137344	31285024	NM_004017, NM_004022	ACATGGAAACGCCTGCCTCGTCCCCTCAGCTTTCACACGATGATACTCATTCACGCATTG	1756	Hs.495912	GO:0002162|GO:0003779|GO:0005200|GO:0005515|GO:0005829|GO:0005856|GO:0007517|GO:0008270|GO:0008307|GO:0008307|GO:0009986|GO:0016010|GO:0016010|GO:0016010|GO:0030049|GO:0042383|GO:0043034|GO:0043043|GO:0043234|GO:0050998	dystrophin Dp71ab isoform	2210.15	1024.1	11.0835	9.77398	2147.03	2577.68	1905.75	1119.05	926.864	1026.38	11.1372	10.9865	11.1268	9.84793	9.74386	9.73016
ASHGA5P022947	0.000946205	0.0116931	2.18712	up	protein_coding	NM_177529	CCDS32420.1	SULT1A1	RefSeq	1285	chr16	-	28616907	28621365		AAGAGCTCAGGGAACGGGCCTGGCTCTGGCCCCTGACGCAGGAACATGGAGCTGATCCAG	6817	Hs.567342	GO:0004062|GO:0004062|GO:0005829|GO:0006584|GO:0006805|GO:0006805|GO:0008146|GO:0008210|GO:0009308|GO:0009812|GO:0044281|GO:0047894|GO:0050294|GO:0050427|GO:0051923	sulfotransferase 1A1 isoform a	22.2066	19.4936	4.87763	3.7486	18.3635	29.3294	18.927	18.8528	17.0228	22.6051	4.76279	4.95055	4.91956	3.61868	3.64826	3.97886
ASHGA5P034607	0.00166712	0.0155287	2.00509	up	protein_coding	NM_004823	CCDS12513.1	KCNK6	RefSeq	2671	chr19	+	38810483	38819649		CTAACGCTTCGGGGTCCGCCAACGCCTCGGACCCCGCCTGGGACTTCGCCTCTGCTCTCT	9424	Hs.240395	GO:0005242|GO:0005886|GO:0006813|GO:0007268|GO:0008076	potassium channel subfamily K member 6	124.221	92.1363	7.13974	6.13607	113.619	150.169	108.876	94.7631	73.8817	107.764	7.17105	7.03623	7.21194	6.11738	5.93421	6.35663
ASHGA5P054899	0.00508587	0.0288315	2.26056	up	protein_coding	NM_004739	CCDS8022.1	MTA2	RefSeq	3069	chr11	-	62360674	62369312		GCCTCCCGGACCCCTTTGTGCGGCCGGAGGCGGCGGCGGGAACGGCCATGGCGGCCAACA	9219	Hs.173043	GO:0000118|GO:0000122|GO:0000989|GO:0001085|GO:0003682|GO:0003700|GO:0004407|GO:0005515|GO:0005634|GO:0005667|GO:0005730|GO:0006333|GO:0008270|GO:0016581|GO:0043565|GO:0044212|GO:0045944	metastasis-associated protein MTA2	67.6248	46.9657	6.27642	5.09974	58.7915	100.334	43.7488	59.1186	37.3472	44.4315	6.2859	6.5225	6.02087	5.39452	4.87702	5.02768
ASHGA5P048821	0.0205373	0.0691617	2.04821	up	protein_coding	NM_006791	CCDS32304.1	MORF4L1	RefSeq	1894	chr15	+	79165122	79190081	NM_001265603, NM_206839	AGGGGGCGGTAGTCGGGGGTGGTGGGAGAAGGAGGAGGCGGCGAATCACTTATAAATGGC	10933	Hs.374503	GO:0000724|GO:0005515|GO:0006351|GO:0006355|GO:0016575|GO:0016580|GO:0035267|GO:0040008|GO:0043967|GO:0043968|GO:0047485	mortality factor 4-like protein 1 isoform 1	229.856	145.431	7.84423	6.80987	159.523	375.26	154.786	191.822	116.133	128.338	7.60477	8.2469	7.68102	7.19163	6.62194	6.61603
ASHGA5P012528	0.000349707	0.00720417	2.27536	up	protein_coding	ENST00000378821		TMEM88B	GENCODE	492	chr1	+	1361507	1363167		CCACTCGAGGGTCCACCCCGCTCCGGGTCCCCGGTGCCGCGCGCTGTTCTCAGACCGCGG	643965	Hs.729765	GO:0016021	transmembrane protein 88B [Source:HGNC Symbol;Acc:37099]	204.671	123.953	7.78362	6.59753	199.057	232.142	182.813	127.057	121.188	123.614	7.87793	7.59415	7.87879	6.54869	6.68787	6.55602
ASHGA5P026129	0.00481848	0.0279837	2.03694	up	protein_coding	NM_000218	CCDS7736.1	KCNQ1	RefSeq	3262	chr11	+	2466220	2870340		CGCCCGGCGGGGCAGCGCGGGCCTGGCCAAGAAGTGCCCCTTCTCGCTGGAGCTGGCGGA	3784	Hs.95162	GO:0005249|GO:0005251|GO:0005516|GO:0005764|GO:0005769|GO:0005770|GO:0005886|GO:0006349|GO:0006936|GO:0007268|GO:0007605|GO:0008015|GO:0008016|GO:0008076|GO:0008076|GO:0015271|GO:0016323|GO:0016458|GO:0042221|GO:0042383|GO:0042589|GO:0046676|GO:0060306|GO:0071435	potassium voltage-gated channel subfamily KQT member 1	105.543	78.4809	6.93424	5.90783	94.7598	110.997	110.872	87.6908	74.2012	73.5506	6.91917	6.64843	7.23511	6.00076	5.93969	5.78303
ASHGA5P009773	0.000538781	0.00894244	4.20965	up	protein_coding	NM_001017523	CCDS41827.1	BTBD11	RefSeq	3900	chr12	+	107974633	108053419		TCCCACTACTCTGGAATTCAGAGGCCCTTCCTCGTGCTGCCGCCGCTGATGGAGTGGATC	121551	Hs.271272	GO:0016021|GO:0046982	ankyrin repeat and BTB/POZ domain-containing protein BTBD11 isoform b	2030.54	559.522	10.9662	8.8925	2215.2	1981.65	1894.76	573.49	579.748	525.327	11.1816	10.5968	11.1202	8.85055	9.06052	8.76644
ASHGA5P055526	5.27156e-05	0.00319065	4.71737	up	protein_coding	NM_001007257	CCDS30603.1	PRDM2	RefSeq	6206	chr1	+	14075875	14114574	NM_012231, NM_015866	GCCCCTGATGTCTGCCGCCTCACCCGGGCCTCCAACACTTTCTTCTTCCTCCTCTTCATC	7799	Hs.371823	GO:0003677|GO:0003700|GO:0005634|GO:0005634|GO:0005794|GO:0006351|GO:0006355|GO:0008270|GO:0018024|GO:0032355	PR domain zinc finger protein 2 isoform c	9094.08	2191.88	13.107	10.869	8008.14	12428.1	6846.02	2242.11	2108.4	2225.12	13.0111	13.3476	12.9623	10.8388	10.9012	10.867
ASHGA5P009277	0.000420858	0.00783153	2.19591	up	protein_coding	NM_001144038	CCDS44746.1	TMEM25	RefSeq	1546	chr11	+	118401802	118417313	NM_001144034, NM_001144035, NM_001144036	TGTCACCAGTGCGTCGCTTCCAGCCCCAGGCCCCTCCCGGCACCCATCTCTGATATCAAG	84866	Hs.564188	GO:0005576|GO:0005886|GO:0016021	transmembrane protein 25 isoform 5 precursor	6773.17	3533.71	12.7208	11.586	6916.9	7029.99	6372.64	3682.11	3352.29	3566.73	12.7988	12.5131	12.8505	11.5857	11.5701	11.6021
ASHGA5P051639	0.0151137	0.0565741	2.29166	up	protein_coding	NM_019069	CCDS3012.1	WDR5B	RefSeq	4183	chr3	-	122130699	122134882		GATGCATAATAACAGTTGTGAGCTTTAGTTTAATGTAATATTTGTAATAAAAACGTTTGG	54554	Hs.567513		WD repeat-containing protein 5B	132.37	86.6799	7.22652	6.03013	137.72	146.972	112.418	73.6882	111.888	74.4636	7.41749	7.00705	7.25503	5.72598	6.56432	5.80009
ASHGA5P029217	0.000240374	0.00610396	5.54573	up	protein_coding	NM_001145862	CCDS53360.1	MTMR11	RefSeq	2879	chr1	-	149900542	149908791		TCCTTGAGGTTTCCCACCCTTAACTGCTGTGTCCCCGGATGGAGCCAGAGAAATGTGGTG	10903	Hs.425144	GO:0016791	myotubularin-related protein 11 isoform a	1487.47	323.816	10.5365	8.06516	1574.39	1444.23	1443.77	321.183	317.331	332.933	10.7219	10.1535	10.7342	7.97925	8.16154	8.05469
ASHGA5P051540	0.000811101	0.0108175	2.97159	up	protein_coding	NM_013286	CCDS33764.1	RBM15B	RefSeq	6650	chr3	+	51428698	51435336		GAGTCCTTTTGTCCAAGATGGCGGCGCCGGGGGCGCTGCCTCCTCGGCCGCCGCCTCCGC	29890	Hs.118738	GO:0000166|GO:0000381|GO:0003723|GO:0005515|GO:0005634|GO:0005654|GO:0005730|GO:0006351|GO:0006397|GO:0006913|GO:0008380|GO:0019048|GO:0045892	putative RNA-binding protein 15B	36.4346	22.7001	5.55789	3.98666	39.0624	38.9263	31.3151	27.4843	19.5198	21.0961	5.75585	5.31616	5.60167	4.21688	3.86432	3.87877
ASHGA5P015332	0.00252893	0.0197507	2.94756	up	protein_coding	NM_001164246	CCDS53450.1	C1orf27	RefSeq	3830	chr1	+	186344889	186390503		ACAGAACATGCCTGCCAGCTAATGTTTGCTGTGGAAAAGTCTATAAATAGAAAGAGATTG	54953	Hs.371210	GO:0008270|GO:0016021|GO:0016491	protein odr-4 homolog isoform 3	178.265	84.4119	7.56107	6.00155	121.328	255.805	157.661	102.141	83.3919	67.7024	7.25428	7.72636	7.70257	6.22398	6.12033	5.66034
ASHGA5P016923	0.000520931	0.0087816	2.74385	up	protein_coding	NM_001136007	CCDS46048.1	FXYD3	RefSeq	1588	chr19	+	35606731	35615228		AACCACACAGAGGCTGGGGCGAGGAGGATACCATCTGTCAGTCTTGGCTGGATGACATCA	5349	Hs.301350	GO:0005254|GO:0005789|GO:0005887|GO:0006821|GO:0034707|GO:0050790|GO:0051117	FXYD domain-containing ion transport regulator 3 isoform 3	89.0149	48.6717	6.63149	5.17528	67.9888	136.056	62.9996	53.5518	43.4786	48.9846	6.48701	6.90608	6.50137	5.24597	5.11128	5.1686
ASHGA5P052884	8.74855e-07	0.00125011	3.62321	up	protein_coding	ENST00000286380	CCDS5224.1	RAET1L	GENCODE	802	chr6	-	150341265	150346668		TTGATTAAATCTCTTGTCCCCAGCCCTCCTGGTCCCCAATGGCAGCAGCCGCCATCCCAG	154064	Hs.558659	GO:0006955|GO:0019882|GO:0016020|GO:0042612|GO:0031225	retinoic acid early transcript 1L [Source:HGNC Symbol;Acc:16798]	6201.04	2013.94	12.5935	10.7362	6132.08	7063.26	5407.8	2125.52	1887.37	2028.92	12.6325	12.5236	12.6244	10.7518	10.7384	10.7185
ASHGA5P033842	0.00244735	0.0193301	2.94059	up	protein_coding	ENST00000408893	CCDS1630.1	C1orf229	GENCODE	2258	chr1	-	247273461	247275719		CGAGGCTGGGGGCCGAGGGTGCGTAGTCGGGGGAGACAGCCGGTCCTAGGGGGCCCTTTG	388759	Hs.456511		chromosome 1 open reading frame 229 [Source:HGNC Symbol;Acc:33759]	51.3793	28.9396	5.91108	4.35497	36.4945	80.6039	37.0394	36.3471	23.9575	26.5142	5.66563	6.24767	5.81992	4.65138	4.18613	4.2274
ASHGA5P055311	1.48737e-05	0.00221669	3.28333	up	protein_coding	NM_175054	CCDS8665.1	HIST4H4	RefSeq	412	chr12	-	14923653	14924065		GGGTCGCACCCTTTATGGTTTCGGCGGTTGAGCTGTCCCCACAGCTTCTCTACAGACTCC	121504	Hs.718935		histone H4	8420.24	2987.93	13.0384	11.3232	7973.04	9954.83	7332.85	3129.29	3048.3	2786.2	13.0056	13.0428	13.0667	11.3268	11.4355	11.2073
ASHGA5P034519	0.00174069	0.0158451	2.63008	up	protein_coding	NM_032620	CCDS32951.1	GTPBP3	RefSeq	2612	chr19	+	17448325	17453540	NM_001195422, NM_133644	AGAGCAGGCTGACCTCATTCTGGCCATGCTGGATGCTTCTGACCTGGCCTCTCCCTCCAG	84705	Hs.334885	GO:0003924|GO:0005525|GO:0005739|GO:0006400	tRNA modification GTPase GTPBP3, mitochondrial isoform V	6205.5	2723.31	12.5793	11.1842	6750.33	5862.51	6003.65	2727.23	2696.11	2746.59	12.7606	12.211	12.7663	11.1216	11.2427	11.1883
ASHGA5P009248	0.0327633	0.0948066	2.14051	up	protein_coding	NM_006462	CCDS12998.1	RBCK1	RefSeq	2633	chr20	+	388708	411610		AAGACCAAGAAAGGCTGTGGGTGAGCGTGGAGGATGCTCAGATGCACACCGTCACCATCT	10616	Hs.247280	GO:0000209|GO:0003677|GO:0003700|GO:0004842|GO:0005515|GO:0006351|GO:0008270|GO:0019048|GO:0032088|GO:0043123|GO:0043130|GO:0043161|GO:0050852|GO:0051092|GO:0071797|GO:0097039	ranBP-type and C3HC4-type zinc finger-containing protein 1 isoform 1	23.4658	21.5389	4.94288	3.84493	16.9743	31.1477	22.2753	25.1867	12.9712	26.4589	4.65946	5.02819	5.141	4.08157	3.22984	4.22338
ASHGA5P018525	0.010322	0.0445236	2.19456	up	protein_coding	NM_001105544	CCDS47472.1	ECHDC1	RefSeq	2132	chr6	-	127609856	127664754	NM_001105545	GCCTGCGACGGTGTTATGATGCTACAACTTCTGGAAAAAGTAATTGAATTGGAAAATTGG	55862	Hs.486410	GO:0004492|GO:0005829|GO:0016831	ethylmalonyl-CoA decarboxylase isoform 3	3010.23	1538.08	11.4627	10.3287	2263.74	4551.44	2215.5	1953.21	1312.19	1348.84	11.2161	11.8457	11.3262	10.6338	10.2258	10.1266
ASHGA5P050779	4.45669e-05	0.0029626	4.39573	up	protein_coding	NM_003468	CCDS33366.1	FZD5	RefSeq	6584	chr2	-	208627309	208634143		AGGGAGGGGGCGATGGCTCGGCCTGACCCATCCGCGCCGCCCTCGCTGTTGCTGCTGCTC	7855	Hs.17631	GO:0000139|GO:0000578|GO:0001525|GO:0004930|GO:0005515|GO:0005737|GO:0005886|GO:0005886|GO:0006915|GO:0007409|GO:0007420|GO:0008285|GO:0008406|GO:0008595|GO:0009986|GO:0016021|GO:0017147|GO:0019901|GO:0030165|GO:0030182|GO:0031076|GO:0031077|GO:0031625|GO:0032729|GO:0033077|GO:0042813|GO:0042813|GO:0042995|GO:0043507|GO:0044332|GO:0045944|GO:0045944|GO:0048469|GO:0060061|GO:0060070|GO:0060070|GO:…	frizzled-5 precursor	197.783	64.5078	7.73745	5.60135	192.509	222.797	178.042	68.0196	56.9226	68.5813	7.83091	7.53415	7.84729	5.60655	5.51773	5.67977
ASHGA5P054627	0.00203985	0.0173959	3.38373	up	protein_coding	NM_001012508	CCDS53589.1	SPRN	RefSeq	3188	chr10	-	135234169	135238121	NR_033789	GCGGCCCTAGGCCTGGCTGGGCTCGGGGACCACATCTGGCCCCCGGCCCGCGCCATCCCC	503542	Hs.64968	GO:0005886|GO:0031225	shadow of prion protein precursor	51.3728	26.3815	5.99086	4.23224	43.231	50.1549	60.7326	29.5213	24.2626	25.3606	5.88631	5.63656	6.44971	4.3359	4.20615	4.15468
ASHGA5P050315	0.00147321	0.014597	3.26599	up	protein_coding	NM_001020819	CCDS12866.1	MYADM	RefSeq	3141	chr19	+	54371136	54379689	NM_001020818, NM_001020820, NM_001020821, NM_138373	TTGTCAAGGTCTAAGACTCTCCCAAGAGGCTCCCGTTCCCTCTCCAACCTCTTTGTTCTT	91663	Hs.380906	GO:0016021	myeloid-associated differentiation marker	2112.22	745.659	11.0216	9.31413	2346.32	2043.08	1947.24	800.78	775.27	660.927	11.2614	10.6483	11.1552	9.35026	9.4865	9.10563
ASHGA5P049996	0.0071595	0.0353375	2.0045	up	protein_coding	NM_020783	CCDS11922.1	SYT4	RefSeq	4111	chr18	-	40847856	40857615		GTCTTCACAGTCTCTCTCTTTGCATGGATCTGCTGTCAGAGAAAATCATCCAAGTCTAAC	6860	Hs.8059	GO:0005215|GO:0005509|GO:0007269|GO:0016021|GO:0030054|GO:0030672|GO:0043005|GO:0048471	synaptotagmin-4	148.416	107.122	7.37262	6.36938	128.975	176.651	139.621	111.795	120.773	88.7992	7.33388	7.24168	7.54231	6.35499	6.68294	6.0702
ASHGA5P007312	1.43227e-05	0.00221669	19.5986	up	protein_coding	NM_178568	CCDS45569.1	RTN4RL1	RefSeq	3183	chr17	-	1837970	1928178		ATGCTTCGCAAAGGGTGCTGTGTGGAGTTGCTGCTGCTGTTGGTAGCTGCGGAGCTGCCC	146760	Hs.22917	GO:0004872|GO:0009897|GO:0009986|GO:0031103|GO:0045121|GO:0046658	reticulon-4 receptor-like 1 precursor	6709.6	410.913	12.7058	8.41308	5398.17	8083.23	6647.4	492.775	349.929	390.035	12.4649	12.7421	12.9103	8.62991	8.30466	8.30466
ASHGA5P012110	5.0328e-05	0.0031254	17.7141	up	protein_coding	NM_001032998	CCDS33299.1	KYNU	RefSeq	1315	chr2	+	143635194	143747106		CGATTAAACCTGCGAGATCGGAGTTCTTTAATTAGGAATGGAATGCAACAGATTTGGACA	8942	Hs.470126	GO:0005634|GO:0005730|GO:0005737|GO:0005739|GO:0005829|GO:0005829|GO:0006569|GO:0006569|GO:0009435|GO:0019441|GO:0019442|GO:0019805|GO:0030170|GO:0030429|GO:0030429|GO:0030429|GO:0034341|GO:0034516|GO:0034641|GO:0042803|GO:0043420|GO:0044281|GO:0097053	kynureninase isoform b	103.297	8.30699	6.79658	2.64975	63.0753	164.55	82.2637	8.06952	8.0262	8.82525	6.38308	7.14817	6.8585	2.60385	2.66444	2.68097
ASHGA5P050040	9.67424e-05	0.00409965	7.33993	up	protein_coding	NM_001405	CCDS12061.1	EFNA2	RefSeq	2143	chr19	+	1286152	1301429		GACCGGGGCCATGGCGCCCGCGCAGCGCCCGCTGCTCCCGCTGCTGCTCCTGCTGTTACC	1943	Hs.137274	GO:0005886|GO:0007267|GO:0007411|GO:0021772|GO:0030316|GO:0031225|GO:0031594|GO:0043204|GO:0046849|GO:0046875|GO:0048013	ephrin-A2 precursor	5007.37	787.485	12.2659	9.39012	5169.81	4989.46	4862.85	852.849	805.698	703.907	12.3893	11.9671	12.4413	9.44425	9.53955	9.18657
ASHGA5P000932	0.00160802	0.0152708	2.20865	up	protein_coding	NM_024955	CCDS13929.1	FOXRED2	RefSeq	5019	chr22	-	36883232	36903090		CGGGCGGCAGGATGGGCCTCTCCGCTGCGGCCCCGTTGTGGGGTCCCCCGGGGCTGCTCC	80020	Hs.387601	GO:0005515|GO:0005788|GO:0016491|GO:0030433|GO:0050660	FAD-dependent oxidoreductase domain-containing protein 2 precursor	42.6123	33.6709	5.76137	4.6182	45.2296	45.8786	36.7287	32.7511	35.3146	32.947	5.94434	5.53199	5.80778	4.49576	4.79124	4.56761
ASHGA5P026392	0.0456417	0.118207	6.34885	up	protein_coding	NM_001005274	CCDS31499.1	OR4A16	RefSeq	987	chr11	+	55110676	55111663		AGAGTATCTCCCACACTGAACATATTTATTCCTAGTTCTAAGGCAACAAATAGGCGGTAA	81327	Hs.554530	GO:0004930|GO:0004984|GO:0005886|GO:0016021	olfactory receptor 4A16	1013.95	137.867	9.43081	6.76431	1222.36	1676.81	142.67	139.132	135.568	138.902	10.3747	10.3449	7.57282	6.69894	6.85961	6.7344
ASHGA5P004353	3.16823e-05	0.00269605	2.75286	up	protein_coding	NM_007185	CCDS1002.1	CELF3	RefSeq	5593	chr1	-	151672533	151689290	NM_001172648	CCATCCTCAGGAACCAGCACCCCTCCTGCCATCGCTGCCACGCCTGTCTCTGCCATTCCG	11189	Hs.26047	GO:0000166|GO:0000381|GO:0000398|GO:0003723|GO:0003729|GO:0005634|GO:0005634|GO:0005737|GO:0007283|GO:0008380|GO:0030317|GO:0048026	CUGBP Elav-like family member 3 isoform 1	6857.55	2895.2	12.7342	11.2733	6853.75	7886.64	5832.26	3199.44	2806.54	2679.63	12.7849	12.6972	12.7206	11.3656	11.3071	11.1473
ASHGA5P013038	0.000635148	0.0095515	2.51341	up	protein_coding	NM_001168243	CCDS54707.1	C4orf48	RefSeq	433	chr4	+	2043719	2045697	NM_001141936	CTGAACCGCGGGCGGCCCCGCTCCCTCTGCTGGCCATGGCCCCCCCGCCCGCGTGCCGGT	401115	Hs.446474	GO:0005576	neuropeptide-like protein C4orf48 isoform 1	72802.1	39002.1	16.3674	15.0378	77809.9	70271.6	70324.8	40036.8	43154.2	33815.2	16.4707	16.1463	16.4852	15.0825	15.1506	14.8802
ASHGA5P046280	0.00267206	0.0204256	2.4187	up	protein_coding	NM_001143982	CCDS48150.1	CHRDL1	RefSeq	4098	chrX	-	109917083	110039286	NM_001143981, NM_145234	CCAAATTAACCTGTGCCTTCCCAGTCTCTGTTCCAGATTCCTGCTGCCGGGTATGCAGAG	91851	Hs.496587	GO:0001503|GO:0001654|GO:0005576|GO:0007399|GO:0030154|GO:0030509|GO:0048749	chordin-like protein 1 isoform 2 precursor	2421.42	1146.7	11.2052	9.93095	2699.21	2328.09	2236.97	1235.57	1108.98	1095.54	11.4383	10.8412	11.336	9.98538	9.98339	9.82407
ASHGA5P002861	0.000718726	0.010178	2.77739	up	protein_coding	NM_003200	CCDS12074.1	TCF3	RefSeq	4451	chr19	-	1609288	1652328		CGCCCAGCAGGGTTTCCAGGCCTGAGGTGCCCGCCCTGGCCCCAGGAGAATGAACCAGCC	6929	Hs.371282	GO:0000080|GO:0002326|GO:0002326|GO:0003677|GO:0003677|GO:0003677|GO:0003700|GO:0003700|GO:0003713|GO:0005515|GO:0005634|GO:0005634|GO:0005654|GO:0005667|GO:0005737|GO:0006351|GO:0006355|GO:0008134|GO:0030183|GO:0030890|GO:0031435|GO:0033152|GO:0042692|GO:0042803|GO:0043234|GO:0043425|GO:0043565|GO:0044212|GO:0045666|GO:0045787|GO:0045893|GO:0045893|GO:0045944|GO:0045944|GO:0046982|GO:0046982|GO:…	transcription factor E2-alpha isoform E12	999.175	426.137	9.93454	8.46081	933.294	1194.27	869.956	425.316	332.885	520.211	9.96474	9.84693	9.99193	8.39853	8.23668	8.7472
ASHGA5P045675	0.00174534	0.0158562	2.34561	up	protein_coding	NM_014471	CCDS6536.1	SPINK4	RefSeq	386	chr9	+	33240195	33248565		TGGCCGTCCGCCAGTGGGTAATCGCCCTGGCCTTGGCTGCCCTCCTTGTTGTGGACAGGG	27290	Hs.555934	GO:0004867|GO:0005576	serine protease inhibitor Kazal-type 4 precursor	1460.79	726.222	10.5066	9.27668	1481.48	1562.56	1338.34	785.139	747.683	645.844	10.643	10.2539	10.623	9.32133	9.43477	9.07394
ASHGA5P048986	0.000117689	0.00446175	2.37713	up	protein_coding	NM_005610	CCDS366.1	RBBP4	RefSeq	7943	chr1	+	33116748	33151812	NM_001135255	CCGCAACGCTCGACCCCAGGATTCCCCCGGCTCGCCTGCCCGCCATGGCCGACAAGGAAG	5928	Hs.16003	GO:0000278|GO:0005515|GO:0005634|GO:0005654|GO:0006260|GO:0006334|GO:0006338|GO:0006351|GO:0006355|GO:0008094|GO:0008285|GO:0016580|GO:0016581|GO:0016581|GO:0016589|GO:0031497|GO:0033186|GO:0034080|GO:0035098|GO:0042393|GO:0042826	histone-binding protein RBBP4 isoform a	2182.97	1059.9	11.0705	9.82131	2141.12	2452.06	1955.71	1100.23	942.816	1136.65	11.1325	10.9174	11.1617	9.81712	9.76647	9.88033
ASHGA5P007568	0.000295155	0.00664406	2.19367	up	protein_coding	NM_002599	CCDS8216.1	PDE2A	RefSeq	4329	chr11	-	72287183	72385497		CGGCTGAGCCGCGGGGCCAGCAGGTCTTCCTCAAGCCGGACGAGCCGCCGCCGCCGCCGC	5138	Hs.503163	GO:0000122|GO:0004112|GO:0004118|GO:0005262|GO:0005515|GO:0005634|GO:0005737|GO:0005759|GO:0005783|GO:0005794|GO:0005829|GO:0005829|GO:0005886|GO:0005886|GO:0006198|GO:0006198|GO:0006626|GO:0007596|GO:0008144|GO:0008144|GO:0008152|GO:0019933|GO:0019934|GO:0030224|GO:0030552|GO:0030553|GO:0030553|GO:0030818|GO:0030911|GO:0033159|GO:0035690|GO:0035690|GO:0036006|GO:0042734|GO:0042803|GO:0043116|GO:…	cGMP-dependent 3',5'-cyclic phosphodiesterase isoform PDE2A3	945.04	501.718	9.85791	8.72456	958.655	1064.73	811.734	527.998	471.138	506.016	10.0046	9.67837	9.89079	8.72951	8.73763	8.70655
ASHGA5P009469	0.0455193	0.117946	2.72256	up	protein_coding	NM_139132	CCDS31347.1	NUP98	RefSeq	6758	chr11	-	3696239	3819022		TTCACCTTCTAAAACTCTACAGTGACAGCATACGTGAGAAGGCTGTTCGAGAGCTGCTTA	4928	Hs.524750	GO:0000059|GO:0000087|GO:0000236|GO:0000278|GO:0000776|GO:0005215|GO:0005515|GO:0005635|GO:0005635|GO:0005643|GO:0005643|GO:0005654|GO:0005829|GO:0005975|GO:0006260|GO:0006913|GO:0006999|GO:0008645|GO:0010827|GO:0015758|GO:0016032|GO:0017056|GO:0019048|GO:0019221|GO:0031080|GO:0031080|GO:0031965|GO:0044281|GO:0051028|GO:0055085	nuclear pore complex protein Nup98-Nup96 isoform 4	112.489	52.6915	6.69467	5.24971	51.4534	226.979	59.0347	53.447	36.2997	68.3278	6.11155	7.5608	6.41167	5.24223	4.83411	5.67279
ASHGA5P055935	0.000245528	0.00613395	2.79202	up	protein_coding	NM_001006943	CCDS30626.1	EPHA8	RefSeq	1866	chr1	+	22890003	22916112		AACCAGGCAGGTAGGCGGAGAAACTCCGTCCCGCAGCGTCCTGGTCCCCCAGCTTCCCCT	2046	Hs.283613	GO:0005004|GO:0005524|GO:0005887|GO:0006929|GO:0007155|GO:0007411|GO:0016322|GO:0030155|GO:0031175|GO:0031901|GO:0033628|GO:0043005|GO:0043410|GO:0043552|GO:0046777|GO:0048013	ephrin type-A receptor 8 isoform 2 precursor	326.794	153.434	8.41057	6.92926	324.51	367.675	288.197	159.893	153.36	147.049	8.52875	8.21438	8.48858	6.91273	7.05393	6.82112
ASHGA5P048797	0.0314939	0.0922948	2.95807	up	protein_coding	NM_001130028	CCDS45304.1	CLK3	RefSeq	2713	chr15	+	74907334	74922542		CGGCTGCGTCACGCGAGGGGGCGGGGCTGCCACGGGCGGAGGTCGCAGCCGGAAGCGGAA	1198	Hs.584748	GO:0001669|GO:0004674|GO:0004712|GO:0004713|GO:0005524|GO:0005634|GO:0005730|GO:0006468|GO:0016607|GO:0043484|GO:0045111	dual specificity protein kinase CLK3 isoform a	20.9612	13.4445	4.75391	3.18925	12.3823	29.4408	21.0604	21.6081	13.4078	5.31751	4.23482	4.95647	5.07043	3.83902	3.28275	2.44598
ASHGA5P049174	3.82369e-05	0.00286214	3.94281	up	protein_coding	ENST00000279804	CCDS10694.1	CTF1	GENCODE	1664	chr16	+	30907927	30914881	NM_001142544	GGCGTGAAGGGAGCCGGGATCAGCCAGGGGCCAGCATGAGCCGGAGGGAGGGAAGTCTGG	1489	Hs.483811	GO:0008284|GO:0008283|GO:0007399|GO:0007267|GO:0007517|GO:0048861|GO:0048666|GO:0005576|GO:0005615|GO:0005125|GO:0005146	cardiotrophin 1 [Source:HGNC Symbol;Acc:2499]	45.3109	20.1602	5.79403	3.8148	40.4882	62.8419	32.6025	22.218	19.5282	18.7345	5.80189	5.929	5.65118	3.88314	3.86475	3.69653
ASHGA5P040346	0.00156015	0.01507	2.15205	up	protein_coding	NM_001102562	CCDS47192.1	MARCH11	RefSeq	1528	chr5	-	16067473	16179897		GGAAGGTCCGAGGCGCCTCCCGGAGGCGGCAGCAGCGAAAGGCGGCCCCGGGGAGTCTGA	441061	Hs.662216	GO:0008270|GO:0016021|GO:0016567|GO:0016874|GO:0030659	E3 ubiquitin-protein ligase MARCH11	7.71246	5	3.44904	2.34333	6.07448	11.5915	5.47145	5	5	5	3.30458	3.73767	3.30486	2.34074	2.34646	2.34278
ASHGA5P010171	0.000643664	0.00963048	6.01489	up	protein_coding	NM_173830	CCDS5071.1	CEP57L1	RefSeq	2530	chr6	+	109450506	109485115		TTCTGATCTTCCCAGATGAAGATAATGGATTCTGAATTAATGCATAGTATAGTAGGAAGC	285753	Hs.632616	GO:0003674|GO:0005575|GO:0005815|GO:0005874|GO:0008017|GO:0008150|GO:0034453|GO:0042802|GO:0043015	centrosomal protein CEP57L1	40.4267	12.029	5.60319	3.01465	26.7825	62.6449	31.8527	11.3327	9.37583	15.3785	5.26311	5.92438	5.62207	2.87028	2.78615	3.38751
ASHGA5P013850	0.000189954	0.00542976	4.08611	up	protein_coding	NM_021126	CCDS46703.1	MPST	RefSeq	1361	chr22	+	37415790	37425863		CGAGACCCGGGCCCGCAGCCCGAGTGTCGCCGCCATGGCTTCGCCGCAGCTCTGCCGCGC	4357	Hs.248267	GO:0004792|GO:0005737|GO:0005739|GO:0005743|GO:0009440|GO:0009636|GO:0016784	3-mercaptopyruvate sulfurtransferase isoform 1	101.885	38.9032	6.87176	4.84103	112.371	118.83	74.4548	38.696	39.0068	39.0067	7.15787	6.73701	6.72038	4.7494	4.94321	4.83047
ASHGA5P007523	0.00112666	0.0127339	2.23002	up	protein_coding	NM_133455	CCDS33630.1	EMID1	RefSeq	2133	chr22	+	29601900	29655586		TGCGAGGAAGTTGCAGCTTCCTCTGCCTCCTTGGAGCCCATGTGGTCGGGCAGTACCATG	129080	Hs.289106	GO:0005581	EMI domain-containing protein 1 isoform 1 precursor	164.298	105.711	7.50929	6.35223	166.252	180.259	146.383	121.286	91.9146	103.932	7.65556	7.26613	7.60618	6.4804	6.26854	6.30775
ASHGA5P029878	0.000173219	0.00525858	3.21029	up	protein_coding	NM_000814	CCDS10019.1	GABRB3	RefSeq	5783	chr15	-	26788693	27018223		AAGGCTTTTCGGCATCTTCTCGGCCCCGGTGCTGGTGGCTGTGGTGTGCTGCGCCCAGAG	2562	Hs.302352	GO:0004890|GO:0005230|GO:0005254|GO:0005886|GO:0005887|GO:0006810|GO:0007165|GO:0007268|GO:0030054|GO:0034220|GO:0034707|GO:0045211|GO:0055085	gamma-aminobutyric acid receptor subunit beta-3 isoform 1 precursor	2393.52	850.458	11.1957	9.51299	2459.62	2511.46	2209.48	899.164	804.569	847.641	11.3138	10.9504	11.3229	9.52878	9.53861	9.47159
ASHGA5P052578	0.00168549	0.0156063	3.13323	up	protein_coding	NM_153020	CCDS4538.1	RBM24	RefSeq	2399	chr6	+	17282931	17294099		TTTAGAGGTTATGTATGTATGTCTGTGTGTGTCTGTTGCTAAGGTCACCATGGCTGACCG	221662	Hs.519904	GO:0000166|GO:0003730|GO:0005634|GO:0005737|GO:0010830|GO:0030154|GO:0043488	RNA-binding protein 24 isoform 2	1181.46	442.758	10.18	8.53233	880.275	1429.66	1234.44	466.957	465.122	396.197	9.87809	10.1384	10.5235	8.54625	8.72275	8.328
ASHGA5P050358	2.19796e-07	0.00111028	6.63818	up	protein_coding	ENST00000317178	CCDS12962.2	ZNF776	GENCODE	5292	chr19	+	58258163	58269527		AGTCATAAGCACAGTCTTGTTGACCATCAGCGAGTTCACACTGGAGAAAGACCTTATGAA	284309	Hs.720254	GO:0006351|GO:0006355|GO:0005634|GO:0005622|GO:0003677|GO:0008270|GO:0003676	zinc finger protein 776 [Source:HGNC Symbol;Acc:26765]	440.418	86.7221	8.79287	6.06208	413.813	556.425	351.015	91.6811	82.1476	86.3376	8.85465	8.76401	8.75993	6.06575	6.09776	6.02273
ASHGA5P015845	5.96861e-06	0.00180355	11.058	up	protein_coding	NM_001163023		PLK1S1	RefSeq	2076	chr20	+	21106623	21227258		AACTTTATGAATATAATCAGTCTGATACATGCAGGTTGCAGTGCACGAGGGGATTAACTC	55857	Hs.187635	GO:0005515|GO:0005813|GO:0007051|GO:0019901	centrosomal protein kizuna isoform 3	54.3662	6.73215	6.01719	2.55017	43.8394	78.6772	40.582	5.76252	6.86804	7.56589	5.90745	6.21607	5.92804	2.45878	2.58871	2.60302
ASHGA5P042653	0.00146944	0.0145866	2.00371	up	protein_coding	NM_001008783	CCDS34544.1	SLC35D3	RefSeq	2371	chr6	+	137243401	137246776		GTTCCTCATCAGCCGCTACCAGTTCTCCTTCCTGACCCTGGTGCAGTGCCTGACCAGCTC	340146	Hs.369703	GO:0008643|GO:0016021	solute carrier family 35 member D3	1831	1063.83	10.8308	9.82809	1794.84	1969.85	1728.31	1067.81	1034.11	1089.57	10.9032	10.5879	11.0012	9.77749	9.88831	9.81849
ASHGA5P003532	0.00187732	0.016613	2.95509	up	protein_coding	NM_001040283	CCDS33034.1	DMRTC2	RefSeq	1821	chr19	+	42349085	42356397		ACAGCCACAGGCCTCTGGAGCCTCGTGCCTGGCCCGGACATCTGGTCCCTCAGAGTGGCA	63946	Hs.350507	GO:0005634|GO:0006351|GO:0006355|GO:0007548|GO:0030154|GO:0043565|GO:0046872	doublesex- and mab-3-related transcription factor C2	502.514	212.388	8.9877	7.4245	521.361	498.642	487.539	203.998	224.939	208.228	9.16268	8.62163	9.17879	7.28596	7.64474	7.3428
ASHGA5P039865	0.0128517	0.0511278	2.12864	up	protein_coding	NM_001169117	CCDS54752.1	STIM2	RefSeq	5222	chr4	+	26862312	27027003		TCACCTTGGGCTCGGTGCGTGCAAAAGTGAATGAGACTAAGTAGTAAAGCTCTCAAAAAA	57620	Hs.135763	GO:0005246|GO:0005509|GO:0005515|GO:0005783|GO:0005789|GO:0005886|GO:0006874|GO:0015279|GO:0016021|GO:0032237|GO:0032237|GO:0051928|GO:0051928	stromal interaction molecule 2 isoform 3 precursor	307.366	189.002	8.32606	7.23613	333.505	319.701	268.89	196.282	216.047	154.676	8.56491	8.02377	8.3895	7.22509	7.58555	6.89774
ASHGA5P050109	0.000218315	0.00581007	2.9101	up	protein_coding	NM_020714	CCDS12272.1	ZNF490	RefSeq	6098	chr19	-	12686919	12721623		AATGTAAGGAATGTGGGAAGGCATTCAGATATCTCACTGCTCTTCGGCGCCATGAAAAAA	57474	Hs.655860	GO:0003677|GO:0005634|GO:0006351|GO:0006355|GO:0008270	zinc finger protein 490	146.36	72.3043	7.31976	5.77869	120.588	199.102	119.389	81.4527	72.4012	63.059	7.24527	7.38264	7.33137	5.88455	5.90079	5.55074
ASHGA5P045052	7.30975e-05	0.00364812	3.30667	up	protein_coding	NM_006558	CCDS6374.1	KHDRBS3	RefSeq	1963	chr8	+	136469715	136659848		TGGCGGAGAAGGACTCCCTGGACCCCTCCTTCACGCACGCCCTGCGCCTGGTGAACCAAG	10656	Hs.444558	GO:0003723|GO:0005515|GO:0005634|GO:0005730|GO:0006351|GO:0006355|GO:0007283|GO:0017124	KH domain-containing, RNA-binding, signal transduction-associated protein 3	2049.69	717.351	10.9853	9.25987	2047.91	2253.68	1847.49	723.203	669.763	759.088	11.0792	10.7903	11.0863	9.19918	9.27423	9.30621
ASHGA5P008213	0.0374749	0.103572	3.03924	up	protein_coding	NM_017820	CCDS48066.1	EXD3	RefSeq	2887	chr9	-	140201347	140317714		AGGAGGGGCCCAGGAGCTCAGGTGACGAGGCCACCCAGAGCCAGGCGGTGCAGGAGCCAG	54932	Hs.495553	GO:0003676|GO:0005515|GO:0005622|GO:0008408	probable exonuclease mut-7 homolog	14.3265	6.77043	4.15201	2.5483	5.48741	18.0142	19.4778	8.46846	6.77759	5.06525	3.18257	4.31119	4.96227	2.62918	2.5825	2.43323
ASHGA5P055109	9.63563e-05	0.00409965	7.40959	up	protein_coding	NM_182962	CCDS8315.1	BIRC3	RefSeq	4372	chr11	+	102188180	102210135	NM_001165	GATGAATACTCCTGTGATTAATGCTGCCGTGGAAATGGGCTTTAGTAGAAGCCTGGTAAA	330	Hs.127799	GO:0004842|GO:0005515|GO:0005634|GO:0005737|GO:0006915|GO:0007166|GO:0008270|GO:0034121|GO:0038061|GO:0039535|GO:0043123|GO:0045088|GO:0050727|GO:0070424|GO:2000116	baculoviral IAP repeat-containing protein 3	315.801	57.2657	8.3001	5.41071	224.343	467.465	255.594	69.0106	47.5123	55.2741	8.03968	8.53966	8.32097	5.62981	5.24728	5.35504
ASHGA5P036814	0.00354993	0.0237151	2.05858	up	protein_coding	NM_080608	CCDS13383.1	SPATA25	RefSeq	752	chr20	-	44515129	44516238		TAAAAGGGGCCAGCCTCCTGGCTCCTGCTTGTAGATGGATGAAATAGCACCAGATATGTA	128497	Hs.128235	GO:0003674|GO:0005575|GO:0007283|GO:0016021|GO:0030154	spermatogenesis-associated protein 25	68.7126	54.1558	6.38384	5.3422	71.0396	72.6342	62.4641	50.7389	57.0008	54.7277	6.54664	6.1157	6.4892	5.16624	5.52042	5.33993
ASHGA5P014343	0.0022863	0.0185977	3.47933	up	protein_coding	NM_014447	CCDS3780.1	ARFIP1	RefSeq	2860	chr4	+	153701111	153833063		AGCAGCCGAGGAGTCTACCATGGCTCAAGAATCTCCCAAAAATTCAGCAGCAGAAATTCC	27236	Hs.416089	GO:0000139|GO:0003674|GO:0005829|GO:0006886|GO:0019904|GO:0042802|GO:0050708	arfaptin-1 isoform 2	1751.04	555.043	10.6777	8.87886	2009.06	2264.24	979.812	576.779	523.069	565.282	11.0567	10.7953	10.1809	8.8606	8.90255	8.87343
ASHGA5P052911	0.0026985	0.0205261	3.15635	up	protein_coding	NM_144980	CCDS5288.1	C6orf118	RefSeq	1852	chr6	-	165693152	165723111		ACAGCCCAGCCCAGGCAGCTGGAGGGAAGGAAGCGATGGCGGAGGAGCGGGAGCCTGAAT	168090	Hs.144734		uncharacterized protein C6orf118	76.6253	39.1518	6.48086	4.8226	57.8868	102.725	69.2642	41.534	45.9245	29.9969	6.26744	6.55215	6.62297	4.85659	5.19534	4.41586
ASHGA5P001406	0.00507401	0.0287869	2.18865	up	protein_coding	NM_002821	CCDS4884.1	PTK7	RefSeq	4249	chr6	+	43044005	43129458	NM_001270398, NM_152880, NM_152881, NR_072997, NR_072998	AACAGCTGCAACATCAAGCACACGGAGGCCCCCCTCTATGTCGTGGACAAGCCTGTGCCG	5754	Hs.90572	GO:0004714|GO:0005515|GO:0005524|GO:0005887|GO:0005911|GO:0007155|GO:0007165|GO:0010976|GO:0016477|GO:0031532|GO:0060070|GO:0071300	inactive tyrosine-protein kinase 7 isoform a precursor	3663.02	1942.16	11.8102	10.6801	3828.57	3561.98	3598.52	2004.33	2044.68	1777.47	11.9597	11.4557	12.0151	10.663	10.8561	10.5212
ASHGA5P048577	0.0148406	0.0560086	2.06072	up	protein_coding	NM_002487	CCDS10014.1	NDN	RefSeq	1897	chr15	-	23930553	23932450		AAGTATACAAAACAAAACAGTAAGATTGTCTGTAATCACATCATATGGGAATAAAAAACA	4692	Hs.50130	GO:0001764|GO:0003016|GO:0003677|GO:0005634|GO:0005813|GO:0005829|GO:0006351|GO:0006355|GO:0007399|GO:0007413|GO:0007417|GO:0008285|GO:0008347|GO:0009791|GO:0019233|GO:0040008|GO:0042995|GO:0043015|GO:0043204|GO:0048011|GO:0048676|GO:0048871|GO:0071514	necdin	2564.59	1431.59	11.2839	10.2408	2830.29	2342.34	2521.15	1382.16	1599.79	1312.82	11.5078	10.851	11.493	10.1328	10.5063	10.0833
ASHGA5P009173	0.000964086	0.0118116	3.68202	up	protein_coding	ENST00000352793	CCDS42358.1	TAC4	GENCODE	564	chr17	-	47915670	47925379		CGAGTGGGAGGCAGAGAGGATGAGGCCCAAGGTTCAGAGTAAAAGCCCCCACCACAGACT	255061	Hs.652130	GO:0008217|GO:0046878|GO:0007217|GO:0005576|GO:0005102	tachykinin 4 (hemokinin) [Source:HGNC Symbol;Acc:16641]	125.507	52.336	7.16618	5.28569	134.148	119.525	122.847	57.9437	49.0176	50.0466	7.37998	6.74377	7.37481	5.36316	5.2923	5.2016
ASHGA5P002287	3.48989e-06	0.00166562	16.8576	up	protein_coding	NM_001143787	CCDS44860.1	PPHLN1	RefSeq	3412	chr12	+	42719946	42842422	NM_016488	TTGCATTGAGGCAGAATTTACATGAAATAGAGTCTGCAGGACAGACTTGGCAGCAGGTAC	51535	Hs.444157	GO:0005634|GO:0005730|GO:0005737|GO:0031424	periphilin-1 isoform 6	695.099	54.2684	9.41511	5.33978	633.5	831.456	620.342	57.9843	56.1774	48.6434	9.4237	9.31798	9.50365	5.36413	5.49784	5.15738
ASHGA5P017653	0.000294425	0.00664406	5.7886	up	protein_coding	NM_001142776	CCDS45233.1	CHAC1	RefSeq	1443	chr15	+	41245635	41248717		TACCAAGTGCAAGGGGAGCAGAACCCTGGTTACCTGGGCCCTGCGCCTGAAGAGGCCATT	79094	Hs.155569	GO:0005112|GO:0005515|GO:0005794|GO:0005802|GO:0005829|GO:0006986|GO:0007219|GO:0010955|GO:0022008|GO:0045746|GO:0070059	cation transport regulator-like protein 1 isoform b	1321.12	277.499	10.3618	7.82859	1445.57	1264.38	1253.42	285.26	267.873	279.363	10.6074	9.94131	10.5366	7.79124	7.90353	7.79099
ASHGA5P014459	0.00219806	0.0181923	4.6897	up	protein_coding	NM_001145785	CCDS46024.1	MEF2B	RefSeq	1472	chr19	-	19256375	19281098		GGCCCAGGCCGAGCAGACAAAGATCATTCCACTCAGCCTGGGACGATGGGGAGGAAAAAA	100271849		GO:0003677|GO:0003700|GO:0005634|GO:0005667|GO:0006351|GO:0007517|GO:0042826|GO:0046983	myocyte-specific enhancer factor 2B isoform a	36.2427	14.366	5.47021	3.24071	34.6853	51.9863	22.0564	20.3369	12.3981	10.363	5.59656	5.68592	5.12815	3.73966	3.15947	2.82301
ASHGA5P033545	5.16551e-05	0.0031533	2.0683	up	protein_coding	NM_001004343	CCDS31074.1	MAP1LC3C	RefSeq	1192	chr1	-	242158791	242162385		TTTTTTAAAACAGACACAGCTACTGAGTGCAATGCCGCCTCCACAGAAAATCCCAAGCGT	440738	Hs.534971	GO:0000421|GO:0005515|GO:0005776|GO:0005874|GO:0006914|GO:0012505|GO:0031090|GO:0031410	microtubule-associated proteins 1A/1B light chain 3C	91.79	67.5102	6.72917	5.68072	79.0075	119.295	77.0673	67.7119	66.7852	68.0335	6.67692	6.74146	6.76913	5.60066	5.77296	5.66854
ASHGA5P049277	0.00326641	0.0227407	2.01525	up	protein_coding	NM_001193522	CCDS54028.1	FAM65A	RefSeq	4136	chr16	+	67562719	67580691		TCTCCTTCAGGAGTTTCCCGGTCTTCAGCCCGCCGGGGCCCCCACGGAAGCCCCCCGCGC	79567	Hs.152717	GO:0005737	protein FAM65A isoform 2	197.119	134.04	7.73218	6.72122	214.977	206.673	169.707	142.744	125.462	133.913	7.97568	7.43206	7.78881	6.74237	6.74088	6.68042
ASHGA5P034731	5.40626e-06	0.00180355	3.39561	up	protein_coding	NM_001195076	CCDS54296.1	C19orf81	RefSeq	765	chr19	+	51152701	51162567		CAGAGGTGGAGCCCGTGTGCTTCCCTGCCATGGGCAGCCCCACCATGCACAGGAAGGCAG	342918	Hs.531650		putative uncharacterized protein C19orf81	650.645	231.841	9.313	7.54933	539.592	851.635	560.709	248.356	205.678	241.488	9.2131	9.35264	9.37326	7.57817	7.50902	7.5608
ASHGA5P016646	3.40915e-05	0.00274895	12.8094	up	protein_coding	NM_014775	CCDS43005.1	SFI1	RefSeq	4298	chr22	+	31892124	32014537	NM_001258325	CAGCCAGCTGCTGCTGCACAGGTTCTGGAACCTCTGGCGGTCTCAGATTGAGCAGAAAAA	9814	Hs.62209	GO:0000086|GO:0000278|GO:0005515|GO:0005814|GO:0005829|GO:0010923|GO:0019902	protein SFI1 homolog isoform b	241.896	27.9551	7.99873	4.3196	200.613	285.253	239.822	27.2089	31.1267	25.5297	7.88621	7.87608	8.23391	4.20089	4.59225	4.16565
ASHGA5P028674	0.0202288	0.0685074	2.00621	up	protein_coding	NM_017817	CCDS9512.1	RAB20	RefSeq	1530	chr13	-	111175412	111214071		TTCTTACGGGAAGATGAGGAAGCCCGACAGCAAGATCGTGCTCCTGGGGGACATGAACGT	55647	Hs.740688	GO:0005525|GO:0005794|GO:0007264|GO:0015031	ras-related protein Rab-20	12.2622	12.8288	4.12071	3.11624	13.4226	10.7518	12.612	15.0328	12.6059	10.8478	4.3391	3.63785	4.38519	3.27798	3.18401	2.88674
ASHGA5P037166	0.00802601	0.0378804	2.18309	up	protein_coding	ENST00000343916	CCDS13505.1	COL9A3	GENCODE	2485	chr20	+	61448413	61472511		AGCATGGGAGACCCCGGCCTTCCAGGCCCCCAGGGCCTCCGAGGTGACGTGGGCGACCGG	1299	Hs.716639	GO:0007411|GO:0008585|GO:0008584|GO:0005576|GO:0005594|GO:0030020	collagen, type IX, alpha 3 [Source:HGNC Symbol;Acc:2219]	74.5195	55.2418	6.48898	5.36261	78.9505	73.4515	71.1566	48.0383	54.4352	63.2518	6.67518	6.13317	6.65859	5.07832	5.45291	5.5566
ASHGA5P006180	0.000967428	0.011821	2.28	up	protein_coding	NM_025104	CCDS45706.1	DBF4B	RefSeq	1821	chr17	+	42785975	42829636	NM_145663	TGCTGCAGAAGGCTATCAGAAACCAGGGGAGCATCAGTGGAGGAGGCAGTGGGGGCAGCA	80174	Hs.369998	GO:0003676|GO:0005634|GO:0007049|GO:0008270|GO:0016235|GO:0043231	protein DBF4 homolog B isoform 2	64.4071	45.4228	6.25032	5.06129	56.9863	88.1927	48.0423	46.6357	37.0265	52.6062	6.2448	6.36198	6.14417	5.03421	4.86555	5.2841
ASHGA5P034824	0.000184384	0.00538835	2.81125	up	protein_coding	NM_001002919	CCDS46218.1	FAM150B	RefSeq	1403	chr2	-	279560	288308		CCCCGAGCGCACGATGCGCGGACCCGGGCACCCCCTCCTCCTGGGGCTGCTGCTGGTGCT	285016	Hs.355207	GO:0005576	protein FAM150B precursor	55158.4	24755.1	15.9187	14.4275	60123.8	54285.9	51065.6	26246.1	26343.3	21676	16.0322	15.7393	15.9847	14.5009	14.4854	14.2964
ASHGA5P036522	4.13154e-05	0.00291494	3.81346	up	protein_coding	NM_001195129		PRSS56	RefSeq	2158	chr2	+	233385172	233390425		TCCTGGTCACCATGCTGCTGGCTGTGCTGCTGCTGCTACCCCTCCCAAGCTCATGGTTTG	646960	Hs.570310	GO:0004252|GO:0006508	putative serine protease 56 precursor	41103	13324.2	15.4427	13.5116	37338.8	48670.1	37300.1	13581.6	12399.3	13991.7	15.3069	15.5369	15.4842	13.4976	13.3962	13.6408
ASHGA5P012428	8.91143e-05	0.00397087	6.63688	up	protein_coding	NM_198455		SSPO	RefSeq	15580	chr7	+	149473130	149531053		CAATGGCTCGCCTGGACTCCTGCAACAACTGCACCTGTGTCTCTGGTAAGATGGCATGCA	23145	Hs.632022	GO:0005615|GO:0007155|GO:0030414	SCO-spondin precursor	2486.06	438.424	11.2484	8.51791	2295.39	2629.54	2533.26	466.783	449.763	398.726	11.2338	11.0127	11.4988	8.54589	8.66979	8.33807
ASHGA5P033782	0.00060147	0.00941185	2.93293	up	protein_coding	NM_001100619	CCDS42417.1	CABLES1	RefSeq	5024	chr18	+	20715726	20840434		GGGCCGCCGGGCAGGAGGAGTTGGAGGAGGACGATGCCTTTATCAGCGTGCAGGTGCCGG	91768	Hs.11108	GO:0005634|GO:0005829|GO:0007049|GO:0007399|GO:0007596|GO:0016538|GO:0051301|GO:0051302|GO:0051726	CDK5 and ABL1 enzyme substrate 1 isoform 2	65.7345	36.1042	6.26869	4.71635	46.8736	91.6216	58.7083	37.5554	31.0567	39.7005	5.99362	6.40889	6.40356	4.70176	4.58964	4.85765
ASHGA5P014073	0.000716794	0.0101773	2.69097	up	protein_coding	NM_020195	CCDS45091.1	SDR39U1	RefSeq	1247	chr14	-	24908971	24912007		TGTGCTTGTGGGTGGCGGGACAGGCTTCATTGGGACAGCCCTAACCCAGCTGCTGAATGC	56948	Hs.643552	GO:0000166	epimerase family protein SDR39U1	322.998	157.78	8.39577	6.96764	322.67	344.439	301.886	153.305	150.433	169.603	8.51848	8.11767	8.55116	6.84607	7.02202	7.03484
ASHGA5P031089	0.0284547	0.0862543	2.37128	up	protein_coding	NM_138447	CCDS10686.1	ZNF689	RefSeq	2724	chr16	-	30614699	30621682		GTCGGAAAAGGGGCAGGAGGCCGAGGGCTCTGAAGTTCGTGGACGTGGCCGTGTACTTCT	115509	Hs.454685	GO:0003677|GO:0005634|GO:0006351|GO:0006355|GO:0008270	zinc finger protein 689	12.3341	10.1756	4.10542	2.85975	9.35081	15.0548	12.5966	10.0742	15.4527	5	3.8565	4.07629	4.38346	2.73977	3.49669	2.34278
ASHGA5P008362	0.0176006	0.0626036	2.333	up	protein_coding	NM_015868	CCDS33107.1	KIR2DL3	RefSeq	1596	chr19	+	55249973	55264504	NM_014218	TCCGAAACCGGTAACCCCAGACACCTGCATGTTCTGATTGGGACCTCAGTGGTCATCATC	3804	Hs.731378	GO:0003823|GO:0004872|GO:0005515|GO:0005886|GO:0005887|GO:0006955|GO:0016021|GO:0050776	killer cell immunoglobulin-like receptor 2DL3 precursor	128.866	82.9952	7.20123	5.97905	136.544	118.296	131.758	85.5762	97.1145	66.2949	7.40621	6.73161	7.46588	5.96488	6.34499	5.62728
ASHGA5P051619	0.0188942	0.0656121	3.20622	up	protein_coding	NM_018338	CCDS2972.1	WDR52	RefSeq	3281	chr3	-	113081711	113160361		TAAACGAACAGTAAGCCTAATATAAACTTGATTTTTATTTTAACATATGCTATTTCTGGA	55779	Hs.584936		WD repeat-containing protein 52 isoform 2	26.4994	16.29	5.11983	3.43895	33.1419	21.4167	24.9398	15.9825	21.742	11.1454	5.53662	4.53521	5.28765	3.3639	4.03054	2.92242
ASHGA5P016345	0.0026097	0.0200982	4.55197	up	protein_coding	NM_001159524		ZNF735	RefSeq	1239	chr7	+	63667580	63680668	NM_001159279	AAACACCCAGTTACATGTTCTCATTTCAACCAAGACCTTCAGCCAGAGCAGAGCATAAAA	730291	Hs.723116	GO:0003677|GO:0005634|GO:0006351|GO:0006355|GO:0008270	putative zinc finger protein 735	72.2395	27.56	6.44507	4.25858	80.1105	70.2946	66.3132	21.6393	23.8404	37.2002	6.69398	6.07273	6.56849	3.84165	4.17885	4.75523
ASHGA5P007020	0.000468174	0.00830643	2.96297	up	protein_coding	NM_014249		NR2E3	RefSeq	1999	chr15	+	72102893	72110597		AGCCCGTGAGGTTTGGGAAATTGCTCCTGCTCCTCCCGTCTTTGAGGTTTATCACTGCGG	10002	Hs.187354	GO:0003707|GO:0004879|GO:0005634|GO:0005654|GO:0006366|GO:0006367|GO:0007165|GO:0007601|GO:0007602|GO:0008270|GO:0010467|GO:0030522|GO:0043565	photoreceptor-specific nuclear receptor isoform b	2058.27	801.498	10.9891	9.42207	2073.32	2163.29	1938.21	859.349	792.999	752.145	11.0948	10.7247	11.1478	9.45748	9.51818	9.29055
ASHGA5P055443	0.0144897	0.0551205	3.37768	up	protein_coding	ENST00000430889	CCDS8873.1	HOXC4	GENCODE	1666	chr12	+	54447660	54449814		TCCACTCCAGAAATTAATGATCATGAGCTCGTATTTGATGGACTCTAACTACATCGATCC	3221		GO:0006351|GO:0007275|GO:0006355|GO:0009952|GO:0051216|GO:0048562|GO:0005634|GO:0003677|GO:0003700|GO:0043565|GO:0071837	homeobox C4 [Source:HGNC Symbol;Acc:5126]	31.2008	17.0887	5.24326	3.48723	21.2468	50.0665	22.2892	23.5597	17.9739	9.73259	4.95331	5.63478	5.14169	3.9742	3.73422	2.75326
ASHGA5P007817	0.000266068	0.00635329	4.77074	up	protein_coding	NM_032154	CCDS7546.1	PCGF6	RefSeq	2023	chr10	-	105062552	105110891		GTACATCAGACACAACCTCTTTATAACATAAGTGCTAATGAAGGCACGGGACATTTTAAG	84108	Hs.335808	GO:0003677|GO:0003700|GO:0005515|GO:0005634|GO:0006351|GO:0008270|GO:0031519|GO:0031519|GO:0035102|GO:0045892	polycomb group RING finger protein 6 isoform b	172.916	51.963	7.5161	5.26188	128.813	255.63	134.305	64.3379	47.5153	44.0357	7.33169	7.72568	7.49092	5.52284	5.24743	5.01538
ASHGA5P008917	1.65344e-05	0.00229628	3.39083	up	protein_coding	ENST00000397570	CCDS7704.1	IRF7	GENCODE	1885	chr11	-	612554	615999		TGTGCTGGAGGCGAGGCCGCGGCCCCAGAGTCCCCGCACCAGGCAGAGCCGTACCTGTCA	3665	Hs.166120	GO:0045087|GO:0050776|GO:0000122|GO:0045893|GO:0006355|GO:0009615|GO:0045944|GO:0008063|GO:0006468|GO:0006366|GO:0006974|GO:0019221|GO:0045351|GO:0016064|GO:0032727|GO:0032728|GO:2000110|GO:0060333|GO:0034142|GO:0002756|GO:0044419|GO:0060337|GO:0034138|GO:0035666|GO:0019043|GO:0002819|GO:0006473|GO:0034124|GO:0039530|GO:0032608|GO:0032479|GO:0032607|GO:0034127|GO:0045655|GO:0005634|GO:0005737|GO:…	interferon regulatory factor 7 [Source:HGNC Symbol;Acc:6122]	44.3217	23.3639	5.80294	4.0413	41.4809	52.436	39.0481	23.9847	21.0735	25.0335	5.83268	5.69669	5.87945	4.005	3.98503	4.13388
ASHGA5P044483	0.00161555	0.0152989	3.80769	up	protein_coding	NM_198124	CCDS6317.1	CSMD3	RefSeq	13042	chr8	-	113235158	114389382		GAATGTGGAGTTGGTTCCTTTGCTGGAAACCTGTACAGCTTGACCGACAGACAGCCTCAG	114788	Hs.91381	GO:0005886|GO:0016021	CUB and sushi domain-containing protein 3 isoform 2	50.3937	23.9014	5.97926	4.05035	49.9316	50.4294	50.8202	31.2104	19.2692	21.2248	6.07593	5.64412	6.21773	4.42263	3.8418	3.88661
ASHGA5P006893	0.0010532	0.0122613	2.86734	up	protein_coding	NM_021932	CCDS7690.1	RIC8A	RefSeq	2714	chr11	+	208529	215110		GAAGGCCCAGGGATGGCCACCTCCCCAGGTGCTGCCCCCTCTGCGGGATGTGAGGACACG	60626	Hs.592292	GO:0005085|GO:0005737|GO:0005886	synembryn-A	3981.87	1604.86	11.9353	10.4156	4197.51	3906.65	3841.46	1630.82	1632.92	1550.83	12.0821	11.6008	12.123	10.3738	10.5384	10.3346
ASHGA5P009184	0.00569944	0.0309193	2.50477	up	protein_coding	NM_198524	CCDS10157.1	TEX9	RefSeq	1470	chr15	+	56657643	56738072		CTGGAGTTAAGTAAATTAAGGCAAAATAACAAGGACATAGCAAATGAAGAACACAAAAAA	374618	Hs.511476		testis-expressed sequence 9 protein	456.936	231.056	8.85123	7.52655	463.974	531.068	375.765	255.988	261.027	176.153	9.00625	8.69975	8.84767	7.62408	7.86512	7.09045
ASHGA5P040936	0.00484675	0.0280704	7.76529	up	protein_coding	ENST00000328278	CCDS47184.1	LRRC14B	GENCODE	1573	chr5	+	191625	195468		CTGCAAGCTTTCAAAACTGCTCTAGAAAACTTCTCCAGAGCACTCAAACAAATAGAGTAG	389257	Hs.683662		leucine rich repeat containing 14B [Source:HGNC Symbol;Acc:37268]	53.6043	8.75645	5.65996	2.70292	26.684	113.415	20.7143	9.53598	5.76491	10.9685	5.25817	6.67609	5.04561	2.69521	2.51386	2.89968
ASHGA5P005710	0.00309462	0.0220854	2.09443	up	protein_coding	NM_002832	CCDS1423.1	PTPN7	RefSeq	3772	chr1	-	202116140	202130716	ENST00000367279, NM_001199797	AGAAGCATGTGCGACTGCAGGAGAGGCGGGGCTCCAATGTGGCTCTGATGCTGGACGTTC	5778	Hs.402773	GO:0004725|GO:0005737|GO:0005829|GO:0006470|GO:0009898|GO:0035335	tyrosine-protein phosphatase non-receptor type 7 isoform 1	32.3688	27.7858	5.37951	4.31295	24.4683	41.4231	31.215	29.5012	28.9881	24.868	5.14053	5.40041	5.5976	4.33544	4.47743	4.126
ASHGA5P004349	0.00146685	0.0145866	2.51348	up	protein_coding	ENST00000290536	CCDS33229.1	C2orf65	GENCODE	2543	chr2	-	74785009	74875164		CCTCAGGGGCGGCTCCACCCACACTGGGAGAGCCGAGCTCCGAGAAAGCATCCCTGCAAG	130951	Hs.348645	GO:0007283|GO:0006396|GO:0007292|GO:0031497|GO:0016021|GO:0003674	chromosome 2 open reading frame 65 [Source:HGNC Symbol;Acc:25183]	19.8118	15.7197	4.75302	3.42333	18.3358	22.477	18.6227	14.1139	17.458	15.5873	4.76101	4.59955	4.89851	3.17638	3.68589	3.40773
ASHGA5P020760	0.000887002	0.0113715	2.30213	up	protein_coding	ENST00000519479	CCDS54928.1	PCDHGB4	GENCODE	4578	chr5	+	140767451	140892546		AATTCCAGTGAATTGACTTCCCATCAGCAAGCCCCGCCCAACACGGACTGGCGTTTCTCT	8641		GO:0007156|GO:0007155|GO:0016339|GO:0016021|GO:0005886|GO:0016020|GO:0005509	protocadherin gamma subfamily B, 4 [Source:HGNC Symbol;Acc:8711]	458.63	248.841	8.85682	7.65385	476.094	517.911	381.886	279.33	236.94	230.254	9.03687	8.667	8.8666	7.75515	7.7174	7.48901
ASHGA5P004009	1.02965e-06	0.00125011	2.87767	up	protein_coding	NM_006887	CCDS1811.1	ZFP36L2	RefSeq	3702	chr2	-	43449540	43453745		CTTGTGCAAGACAGAGAAATCCCTGGCCAACCTCAACCTGAACAACATGCTGGACAAGAA	678	Hs.503093	GO:0000288|GO:0003677|GO:0003700|GO:0003723|GO:0005634|GO:0005737|GO:0006355|GO:0008270|GO:0008283|GO:0043488	zinc finger protein 36, C3H1 type-like 2	182.973	89.0904	7.63028	6.10537	164.543	233.054	151.322	95.7857	83.782	87.7035	7.64458	7.59885	7.6474	6.13601	6.1281	6.05202
ASHGA5P049280	0.000209069	0.00573348	2.48554	up	protein_coding	NM_024939	CCDS10863.1	ESRP2	RefSeq	4021	chr16	-	68262449	68270136		GCGTGTCTGGCCGAGAGCCCCCTTCCTCTGCGGCCATGACTCCGCCGCCGCCGCCGCCCC	80004	Hs.592053	GO:0000166|GO:0003729|GO:0005634|GO:0005730|GO:0005737|GO:0005739|GO:0005813|GO:0006397|GO:0008380|GO:0043484	epithelial splicing regulatory protein 2	5164.22	2398.79	12.3137	11.0002	5245.92	5671.86	4574.86	2403.32	2125.06	2667.99	12.4131	12.1679	12.3602	10.9474	10.9151	11.138
ASHGA5P037267	5.42183e-05	0.00319434	4.51804	up	protein_coding	NM_181602	CCDS13602.1	KRTAP6-1	RefSeq	219	chr21	-	31986004	31986223		CGCTCCCTCTGTGGCTATGGCTATGGATGCGGCTCTGGCTCTGGCTACTATTATTGAGGA	337966	Hs.553689	GO:0005829|GO:0005882	keratin-associated protein 6-1	4598.59	1162.43	12.1261	9.95037	4998.52	5274.78	3522.46	1238.65	1140.37	1108.27	12.3366	12.0515	11.9901	9.98982	10.0188	9.8425
ASHGA5P004357	0.00121889	0.013263	2.01405	up	protein_coding	NM_052877	CCDS486.2	MED8	RefSeq	1502	chr1	-	43849587	43855483		CCTACCAGCGGCCCTCCTGCCTGGGTTTCATTCTGGCTATCCCTCTAAGGCGCAAGGTGA	112950	Hs.301756	GO:0001104|GO:0005515|GO:0005654|GO:0006367|GO:0010467|GO:0016567|GO:0016592	mediator of RNA polymerase II transcription subunit 8 isoform 3	4552.61	2600.03	12.1206	11.1105	5058.51	4834.94	3764.37	2722.68	2438.78	2638.62	12.3493	11.926	12.0864	11.116	11.0981	11.1173
ASHGA5P054461	0.0392288	0.106781	2.11801	up	protein_coding	ENST00000337653	CCDS7232.1	CHAT	GENCODE	2458	chr10	+	50822082	50873150	ENST00000395562	AGGAGGTACAAGAGGAAGGAGAGAAGTGCGGCCAGCTTGCTTTCTCCAGTCGGGTGGCCG	1103	Hs.302002	GO:0007628|GO:0001666|GO:0042493|GO:0007584|GO:0045471|GO:0007269|GO:0007268|GO:0016358|GO:0007613|GO:0001547|GO:0007274|GO:0008292|GO:0043179|GO:0007622|GO:0007529|GO:0030182|GO:0007517|GO:0005634|GO:0005737|GO:0005829|GO:0030424|GO:0005739|GO:0019717|GO:0043025|GO:0043005|GO:0016746|GO:0033265|GO:0004102	choline O-acetyltransferase [Source:HGNC Symbol;Acc:1912]	35.1123	29.2735	5.48014	4.39743	32.232	27.2931	45.8118	30.9447	29.4331	27.4426	5.50167	4.85824	6.08052	4.41104	4.50041	4.28084
ASHGA5P018455	3.19474e-05	0.00269605	2.57071	up	protein_coding	NM_001136032	CCDS12819.1	KLK11	RefSeq	1195	chr19	-	51525486	51529872		CCCAGAGCCTAGGAACCTGGGGCCCGCTCCTCCCCCCTCCAGGCCATGAGGATTCTGCAG	11012	Hs.57771	GO:0004252|GO:0005576|GO:0006508|GO:0008236	kallikrein-11 isoform 1 precursor	15472.1	7060.58	13.9438	12.5816	16042.4	16561.7	13812.1	7531.47	6928.41	6721.86	14.0066	13.8261	13.9986	12.622	12.5978	12.525
ASHGA5P006843	0.000800949	0.0107828	2.33682	up	protein_coding	NM_001081637	CCDS42614.1	LILRB1	RefSeq	2802	chr19	+	55141967	55149004	NM_001081638, NM_001081639, NM_006669	GTGGTCTCAGGACCGTCTGGGGGCCCCAGCTCCCCGACAACAGGCCCCACCTCCACATCT	10859	Hs.667388	GO:0001915|GO:0002230|GO:0002309|GO:0002740|GO:0002767|GO:0002774|GO:0005737|GO:0005886|GO:0007165|GO:0008157|GO:0009615|GO:0009897|GO:0010628|GO:0014063|GO:0016021|GO:0030107|GO:0030109|GO:0031623|GO:0032393|GO:0032609|GO:0032689|GO:0032945|GO:0035548|GO:0042130|GO:0042169|GO:0042288|GO:0042288|GO:0042288|GO:0042536|GO:0042803|GO:0043065|GO:0045077|GO:0045786|GO:0045806|GO:0045919|GO:0045919|GO:…	leukocyte immunoglobulin-like receptor subfamily B member 1 isoform 2 precursor	510.949	269.656	9.00622	7.78167	506.998	548.857	476.992	288.207	251.93	268.832	9.12197	8.7441	9.15257	7.80522	7.81319	7.72661
ASHGA5P011021	0.0210105	0.0703609	2.25548	up	protein_coding	NM_022126	CCDS7640.1	LHPP	RefSeq	1703	chr10	+	126150340	126302710		GGAAGTTCAGGCCCAGTGACGAGCACCATCCGGAAGTGAAGGCTGATGGGTACGTGGACA	64077	Hs.527748	GO:0000287|GO:0004427|GO:0005634|GO:0005730|GO:0005737|GO:0005829|GO:0006470|GO:0006796|GO:0008969|GO:0042803	phospholysine phosphohistidine inorganic pyrophosphate phosphatase isoform 1	14.8902	13.6515	4.34706	3.17362	11.0129	18.2868	15.3709	11.8739	10.0207	19.0598	4.07745	4.33075	4.63298	2.93387	2.86589	3.7211
ASHGA5P009110	0.00114277	0.0128186	2.40433	up	protein_coding	NM_133168	CCDS12874.1	OSCAR	RefSeq	1385	chr19	-	54597932	54604148		CTGACCCTCTTCCCCCCAGCTTCATACCACCCTAAGCCATGGCTGGGAGCTCAGCCGGCT	126014	Hs.347655	GO:0005576|GO:0005886|GO:0016021	osteoclast-associated immunoglobulin-like receptor isoform 5 precursor	12149.6	5705	13.5288	12.2632	12204.1	15908.4	8336.4	6107.36	5469.78	5537.88	13.595	13.7496	13.2419	12.3117	12.2427	12.2352
ASHGA5P021254	6.28118e-05	0.00332844	2.05399	up	protein_coding	NM_001166290	CCDS53606.1	KCNJ11	RefSeq	2763	chr11	-	17406795	17410878		GCAGGAGCAGCTGGCTGCTCTTCGCCATGGCCTGGTGGCTCATCGCCTTCGCCCACGGTG	3767	Hs.248141	GO:0005249|GO:0005524|GO:0005886|GO:0005886|GO:0005887|GO:0006006|GO:0006112|GO:0007268|GO:0008076|GO:0008282|GO:0008282|GO:0010107|GO:0015272|GO:0030315|GO:0030506|GO:0030955|GO:0033198|GO:0042391|GO:0042493|GO:0044281|GO:0044325|GO:0046676|GO:0050796|GO:0050796|GO:0050877|GO:0071805	ATP-sensitive inward rectifier potassium channel 11 isoform 2	177.006	119.552	7.57368	6.53525	151.506	239.096	140.415	133.685	104.703	120.268	7.5394	7.63151	7.55013	6.63352	6.45782	6.5144
ASHGA5P051466	0.0190514	0.065946	2.41066	up	protein_coding	NM_175888	CCDS33740.1	ZNF620	RefSeq	2776	chr3	+	40547529	40559712		AACTGCCATGGGGCCTCGATCCCTGGGAACCTATGGGCAGGGAGGCTCTCAGAGGTATCT	253639	Hs.581541	GO:0003677|GO:0005634|GO:0006351|GO:0006355|GO:0008270	zinc finger protein 620 isoform a	13.2729	11.364	4.21574	2.94632	14.7061	10.6933	14.4194	10.9847	9.00997	14.0972	4.46444	3.63034	4.55245	2.83178	2.74779	3.25938
ASHGA5P006024	1.22379e-06	0.00125934	4.0031	up	protein_coding	NM_017972	CCDS9849.1	C14orf118	RefSeq	2463	chr14	+	76618258	76669134		ACGAAATCAGTTCAATCCCCTGTCTCCCCTTTACTCCCTGGATGTTCTTGCCGATGCTTC	55668	Hs.410231		uncharacterized protein C14orf118 isoform 2	24398.5	7265.03	14.63	12.6289	24677.7	28516.3	20001.5	7596.25	7000.73	7198.1	14.6478	14.6922	14.55	12.6315	12.6157	12.6394
ASHGA5P050233	0.00135472	0.0140748	2.11661	up	protein_coding	NM_005178	CCDS12642.2	BCL3	RefSeq	1864	chr19	+	45251977	45263301		TGCCGGCGGTCCCCGGGCCCCCCCACGGCCTGGCCCGGCCGGAGGCGCTTTACTACCCCG	602	Hs.31210	GO:0000060|GO:0005515|GO:0005634|GO:0005737|GO:0006351|GO:0006974|GO:0007249|GO:0008134|GO:0009615|GO:0010225|GO:0030330|GO:0030674|GO:0032996|GO:0033257|GO:0042345|GO:0042771|GO:0042981|GO:0043066|GO:0043234|GO:0045415|GO:0045727|GO:0045892|GO:0045893|GO:0048471|GO:0051101|GO:0051457	B-cell lymphoma 3 protein	439.955	260.676	8.81219	7.73043	447.678	475.54	396.647	273.055	253.567	255.407	8.95955	8.56072	8.91629	7.71848	7.82312	7.64968
ASHGA5P050186	0.000979578	0.0118582	2.17671	up	protein_coding	ENST00000396893	CCDS54257.1	ZNF461	GENCODE	3192	chr19	-	37128282	37157739		CGCAGAGGAATTTGTACAAGGAGGTGATGTTGGAGAATTATAGCAACTTGGTGTCACTTG	92283	Hs.590972	GO:0006351|GO:0006355|GO:0005634|GO:0005622|GO:0003677|GO:0008270|GO:0003676	zinc finger protein 461 [Source:HGNC Symbol;Acc:21629]	69.3533	50.842	6.35029	5.22814	59.3327	94.4419	54.2852	60.4293	40.616	51.4808	6.29998	6.44589	6.30501	5.42482	5.00924	5.25037
ASHGA5P049839	0.0027201	0.0205962	2.45328	up	protein_coding	ENST00000319642	CCDS32725.1	USH1G	GENCODE	3561	chr17	-	72912175	72919351		CATCTGGCAGCTTCCAATGGCCACTTGCACTGCCTGTCCTTCCTGGTGTCCTTCGGAGCC	124590	Hs.376688	GO:0007605|GO:0042472|GO:0045494|GO:0060113|GO:0050953|GO:0050957|GO:0005886|GO:0005829|GO:0015629|GO:0005737|GO:0005515|GO:0042803	Usher syndrome 1G (autosomal recessive) [Source:HGNC Symbol;Acc:16356]	1139.46	548.021	10.147	8.85234	1206.15	1150.86	1061.38	627.728	509.526	506.808	10.3485	9.79187	10.3007	8.99141	8.85709	8.70851
ASHGA5P018441	0.0063907	0.0331037	2.47719	up	protein_coding	NM_001142653	CCDS45693.1	PTGES3L	RefSeq	1923	chr17	-	41120104	41132545		TTGAGTTCTATGCCAAAGTGAACTCCAAGCCAGTGTGGCTGTCTGTGGACTTTGATAACT	100885848			prostaglandin E synthase 3 (cytosolic)-like isoform 3	20.6218	16.3322	4.77436	3.46566	25.5928	21.5676	14.7049	19.6303	13.0111	16.3552	5.2016	4.54343	4.57805	3.68281	3.23302	3.48114
ASHGA5P042447	0.0214528	0.0713005	2.44682	up	protein_coding	NM_001143889	CCDS44102.1	BSDC1	RefSeq	2706	chr1	-	32830704	32860062	NM_001143888, NM_018045	AGTTTATGAAGCGGGACCTGACGGAGTTTACCCAGGTGGTGCAGCATGACACGGCCTGTA	55108	Hs.353454		BSD domain-containing protein 1 isoform c	18.0648	15.1382	4.62838	3.33747	20.0237	14.5377	19.6331	19.95	12.0377	13.427	4.87856	4.03357	4.97302	3.70798	3.11615	3.18828
ASHGA5P013316	0.0415786	0.111037	2.53848	up	protein_coding	NM_144711	CCDS2236.1	KLHL23	RefSeq	4089	chr2	+	170590355	170608396		CCGGCGGGAGCCATGGCTCTAAAAGGACAAGAAGATTATATTTATCTTTTCAAGGATTCA	151230	Hs.655150		kelch-like protein 23	16.9309	13.5452	4.53977	3.19581	18.2894	18.8967	13.6065	16.8167	18.8188	5	4.75774	4.37737	4.4842	3.43664	3.808	2.34278
ASHGA5P050957	1.68527e-05	0.00229628	2.84592	up	protein_coding	NM_000687	CCDS13233.1	AHCY	RefSeq	2211	chr20	-	32868070	32891215		TGTTCCCAGACTGAGGCCCAGCCCCCTTCGCCCGTTTCCATCACGAGTGCCGCCAGCATG	191	Hs.388004	GO:0000096|GO:0004013|GO:0005737|GO:0005829|GO:0006730|GO:0006805|GO:0032259|GO:0034641|GO:0042470|GO:0044281	adenosylhomocysteinase isoform 1	3596.23	1450.94	11.7763	10.2674	3610.89	4217.53	2960.26	1589.63	1352.75	1410.45	11.8685	11.7324	11.728	10.3374	10.2707	10.1942
ASHGA5P010554	0.000451219	0.00813249	3.75759	up	protein_coding	NM_005393	CCDS14729.1	PLXNB3	RefSeq	6211	chrX	+	153029650	153044801		CCACTTCATGGCCCCCGTGATGGCTCGCTGGCCTCCCTTCGGCCTCTGCCTCCTCCTGCT	5365	Hs.632833	GO:0004872|GO:0005515|GO:0005622|GO:0005886|GO:0007165|GO:0007411|GO:0016021	plexin-B3 isoform 1 precursor	4128.3	1274.26	11.987	10.0772	4340.25	4049.72	3994.92	1343.02	1294.53	1185.22	12.1316	11.6604	12.1691	10.0943	10.1994	9.93782
ASHGA5P004386	0.00869302	0.0400717	2.60518	up	protein_coding	NM_023002	CCDS12398.1	HAPLN4	RefSeq	3461	chr19	-	19366451	19373596		ACCAATGAGCTGGAAGATGACGCTGGCATGGTCAAGCTGGACCTGGAAGGCGTGGTCTTT	404037	Hs.367829	GO:0005540|GO:0005578|GO:0007155	hyaluronan and proteoglycan link protein 4 precursor	13.1022	9.76778	4.19709	2.81571	11.6572	15.7631	11.8864	10.545	13.7584	5	4.14933	4.13839	4.30354	2.78213	3.32222	2.34278
ASHGA5P055575	1.24369e-05	0.00216313	14.0212	up	protein_coding	ENST00000343702	CCDS9054.1	NTN4	GENCODE	3615	chr12	-	96051582	96184536		CCTCCCGGCCATGGGGAGCTGCGCGCGGCTGCTGCTGCTCTGGGGCTGCACGGTGGTGGC	59277	Hs.201034	GO:0007411|GO:0016322|GO:0060668|GO:0005886|GO:0005604|GO:0005515|GO:0043237	netrin 4 [Source:HGNC Symbol;Acc:13658]	4366.17	370.166	12.072	8.26246	3903.09	4680.46	4514.95	401.62	350.579	358.299	11.9935	11.8859	12.3366	8.31621	8.30916	8.16199
ASHGA5P009503	0.000627856	0.00951488	7.61267	up	protein_coding	NM_006455	CCDS11408.1	LEPREL4	RefSeq	2619	chr17	-	39958204	39968451		AAGTTCGTGGCCACCATGTACCACTACCTGCAGTTTGCCTACTATAAGTTGAATGATGTG	10609	Hs.446459	GO:0000794|GO:0000795|GO:0005730|GO:0007130	synaptonemal complex protein SC65 precursor	595.394	97.1667	9.11727	6.18887	416.678	952.012	417.492	87.2855	73.6884	130.526	8.86519	9.50726	8.97938	5.99528	5.92929	6.64204
ASHGA5P049982	0.00701987	0.0349457	2.48565	up	protein_coding	NM_144662	CCDS32808.1	PSMA8	RefSeq	1829	chr18	+	23713815	23773319	NM_001025096	ATTTTTATAGGACTTACTGCTGATGCTAGAGTAGTAATAAACAGAGCCCGTGTGGAGTGC	143471	Hs.464813	GO:0000075|GO:0000084|GO:0000209|GO:0000216|GO:0000278|GO:0002474|GO:0002479|GO:0004298|GO:0005634|GO:0005829|GO:0006521|GO:0006915|GO:0006977|GO:0010467|GO:0016032|GO:0016070|GO:0016071|GO:0019773|GO:0031145|GO:0034641|GO:0042590|GO:0042981|GO:0044281|GO:0051437|GO:0051439	proteasome subunit alpha type-7-like isoform 1	47.6311	33.7391	5.88179	4.56816	40.0148	60.9052	41.9732	45.3582	31.0573	24.8018	5.78481	5.89013	5.97041	4.99391	4.58986	4.12073
ASHGA5P005087	0.000325948	0.00696237	3.37251	up	protein_coding	NM_021913	CCDS12575.1	AXL	RefSeq	4743	chr19	+	41725107	41767671		CACCAGCTGGTGAAGGAACCTTCAACTCCTGCCTTCTCGTGGCCCTGGTGGTATGTACTG	558	Hs.590970	GO:0001764|GO:0001779|GO:0001786|GO:0001961|GO:0001974|GO:0004714|GO:0005515|GO:0005524|GO:0005615|GO:0005887|GO:0006909|GO:0006954|GO:0007165|GO:0007167|GO:0007283|GO:0009986|GO:0021885|GO:0030168|GO:0031668|GO:0032689|GO:0032720|GO:0032825|GO:0032940|GO:0034101|GO:0034446|GO:0035457|GO:0042698|GO:0043277|GO:0043491|GO:0043524|GO:0045087|GO:0046982|GO:0048469|GO:0051250|GO:0051897|GO:0060068|GO:…	tyrosine-protein kinase receptor UFO isoform 1 precursor	1059.4	376.11	10.0386	8.28478	1091.98	1118.95	967.281	420.542	342.098	365.691	10.2005	9.7532	10.1621	8.38024	8.27486	8.19924
ASHGA5P047303	0.00193769	0.0169049	2.3447	up	protein_coding	NM_014317	CCDS31168.1	PDSS1	RefSeq	1679	chr10	+	26986594	27035726		CTTTCAGACTCCGACCATGGCCTCGCGCTGGTGGCGGTGGCGGCGCGGCTGCTCCTGGAA	23590	Hs.558468	GO:0000010|GO:0005739|GO:0006744|GO:0006744|GO:0008299|GO:0046872|GO:0046982|GO:0050347|GO:0051290	decaprenyl-diphosphate synthase subunit 1	106.083	67.9069	6.89994	5.67054	82.3562	146.025	89.8671	84.4289	60.693	58.5989	6.72957	6.99832	6.97195	5.94538	5.62288	5.44336
ASHGA5P049411	0.00358843	0.0238079	2.47425	up	protein_coding	NM_001163809	CCDS54062.1	WDR81	RefSeq	6869	chr17	+	1628124	1641893		CCTGGAGGAGATGGCCCAGGGCAGCGGGGGGCGGGAAGGCGCTCTCAGAACCCCGGCCGG	124997	Hs.234572	GO:0010923	WD repeat-containing protein 81 isoform 1	44.0596	30.1672	5.75096	4.44397	28.7482	58.0029	45.4277	31.8454	29.202	29.4543	5.35203	5.83039	6.07047	4.45117	4.49099	4.38975
ASHGA5P010130	0.000335404	0.00702334	2.05156	up	protein_coding	NM_005992	CCDS13765.1	TBX1	RefSeq	1538	chr22	+	19744225	19771112		ACGGAGAAAGGGCTGGTCACAGAAGGCTCTGGGCTCCAACCTGGCTTGCTGGACGTGCTC	6899	Hs.173984	GO:0001525|GO:0001568|GO:0001708|GO:0001755|GO:0001934|GO:0001945|GO:0001974|GO:0002053|GO:0003007|GO:0003148|GO:0003151|GO:0003677|GO:0003700|GO:0005634|GO:0006351|GO:0006357|GO:0006357|GO:0007368|GO:0007389|GO:0007498|GO:0007507|GO:0007517|GO:0007605|GO:0008283|GO:0008284|GO:0009952|GO:0021644|GO:0030855|GO:0030878|GO:0035176|GO:0035909|GO:0042471|GO:0042472|GO:0042473|GO:0042474|GO:0042475|GO:…	T-box transcription factor TBX1 isoform B	76.4489	58.9631	6.50617	5.46944	64.9353	91.7106	72.7009	62.1464	55.8862	58.8569	6.42264	6.40977	6.68609	5.46921	5.48958	5.44953
ASHGA5P042324	0.0285926	0.0865751	2.7457	up	protein_coding	NM_024493	CCDS4650.1	ZKSCAN3	RefSeq	4725	chr6	+	28317690	28336954	NM_001242894	AAAGGTGGAGGAAGAAGAAGCCGGTTTTCCCAGTAGCCCAGATCTGGGTTCTGAGGGCTC	80317	Hs.380930	GO:0003677|GO:0003682|GO:0003700|GO:0005634|GO:0006351|GO:0008270|GO:0016032|GO:0045893	zinc finger protein with KRAB and SCAN domains 3 isoform 1	18.4401	12.1852	4.49757	3.0404	8.01448	28.198	19.1079	12.51	9.97512	14.0704	3.65899	4.90024	4.93349	3.00451	2.8602	3.25649
ASHGA5P041532	0.000100997	0.00413707	5.65899	up	protein_coding	NM_014592	CCDS4374.1	KCNIP1	RefSeq	2020	chr5	+	169931047	170163636	NM_001034837	ATGGGGGCCGTCATGGGCACCTTCTCATCTCTGCAAACCAAACAAAGGCGACCCTCGAAA	30820	Hs.484111	GO:0005244|GO:0005267|GO:0005509|GO:0005513|GO:0005515|GO:0005886|GO:0007165|GO:0007268	Kv channel-interacting protein 1 isoform 2	143.633	38.9018	7.34149	4.84094	140.268	152.944	137.686	38.2899	39.9703	38.4454	7.44148	7.05829	7.52469	4.7344	4.98158	4.80684
ASHGA5P017432	0.00402114	0.0252546	2.21411	up	protein_coding	ENST00000441508	CCDS44430.1	C10orf105	GENCODE	4837	chr10	-	73471457	73479578		TGGCTCTGAGGAGCCATGAGCACAGAGGGCCCCAGCCTCGCCAGCTCCCCAGCCATCAGC	414152	Hs.568788	GO:0016021	chromosome 10 open reading frame 105 [Source:HGNC Symbol;Acc:20304]	532.3	294.752	9.06903	7.92231	543.515	530.709	522.676	317.162	282.47	284.626	9.22241	8.69868	9.286	7.96109	7.98472	7.82111
ASHGA5P012351	0.00014627	0.00494662	3.03809	up	protein_coding	NM_198572	CCDS6413.2	SPATC1	RefSeq	2065	chr8	+	145086581	145102015		AACCCCCGAGAGTCGAAGCAGCTGGCCTGGGAGAGGCTGGTGGGTGAGATTGCCTTCCAG	375686	Hs.97726	GO:0005813|GO:0043015	speriolin isoform 1	57.8321	31.7555	6.12188	4.51872	47.7711	77.6765	48.0487	30.5318	28.4961	36.2386	6.02124	6.19978	6.14462	4.38781	4.4519	4.71644
ASHGA5P005377	0.0013378	0.0139728	2.06562	up	protein_coding	NM_138296	CCDS4874.1	PTCRA	RefSeq	1097	chr6	+	42883726	42893575	NM_001243168	CTACCCACAGGTGTGGGCGGCACACCCTTTCCTTCTCTGGCCCCACCAATCATGCTGCTG	171558	Hs.169002	GO:0005515|GO:0016021|GO:0070244	pre T-cell antigen receptor alpha isoform 2 precursor	534.185	315.425	9.05908	8.0125	555.637	605.969	440.95	341.181	259.291	345.803	9.24411	8.88057	9.05255	8.07697	7.85602	8.10451
ASHGA5P006772	0.00146983	0.0145866	2.01342	up	protein_coding	NM_001135245	CCDS47306.1	TCOF1	RefSeq	4885	chr5	+	149737201	149779871	NM_000356, NM_001135243	TTCAAGTGGGGTTGACAGTGCTGTGGGAACACTCCCTGCAACAAGTCCCCAGAGCACCTC	6949	Hs.519672	GO:0001501|GO:0005215|GO:0005515|GO:0005634|GO:0005730|GO:0005737|GO:0042790	treacle protein isoform f	54.268	45.3344	6.06824	5.05859	50.9635	61.904	49.9364	48.4775	37.1929	50.3328	6.09806	5.91094	6.19572	5.09314	4.87205	5.21059
ASHGA5P033895	0.000323472	0.00694854	2.73971	up	protein_coding	ENST00000382675	CCDS54189.1	C18orf63	GENCODE	5065	chr18	+	71983109	72026422		TATTTTTCATGCCATCCCCGCTGCCTGTCCTTTTCACTCATATGGAGATTTCCAGAGACA	644041	Hs.465414		chromosome 18 open reading frame 63 [Source:HGNC Symbol;Acc:40037]	2736.85	1144.9	11.3801	9.92604	2774.87	2915.45	2520.23	1229.09	1133.6	1072	11.482	11.1662	11.4921	9.97527	10.009	9.79385
ASHGA5P006452	0.0180611	0.0636807	2.82948	up	protein_coding	NM_022772	CCDS31328.1	EPS8L2	RefSeq	3156	chr11	+	706119	727727		CGAGTCACAGGAGGAGCTGGAAGACTTCCCGCTGCCCACGGTGCAGCGCAGCCAGACGGT	64787	Hs.55016	GO:0005737|GO:0005886	epidermal growth factor receptor kinase substrate 8-like protein 2	28.686	20.3876	5.24665	3.74611	24.9753	29.9684	31.1143	23.9328	11.6416	25.5884	5.16771	4.97987	5.59236	4.00254	3.06629	4.1695
ASHGA5P047465	0.000236926	0.00606214	8.75256	up	protein_coding	NM_012339	CCDS7294.1	TSPAN15	RefSeq	1726	chr10	+	71211225	71267423		TGAAAGTGCCTTCCTGGCTCCAGCCATCATCCTCATCCTCCTGGGCGTCGTCATGTTCAT	23555	Hs.499941	GO:0005887|GO:0016020	tetraspanin-15	14648.6	2024.19	13.8521	10.7224	16326.5	14182.9	13436.4	2328.65	2221.24	1522.68	14.0398	13.5762	13.9404	10.8955	10.9624	10.3095
ASHGA5P017114	0.000207285	0.00572087	2.77556	up	protein_coding	NM_148913	CCDS47608.1	ABHD11	RefSeq	1446	chr7	-	73150426	73153184		CCGAGCCGAGGCTTCTGGACGGGGAGGCAGCCCTCCCGGCCGTCGTCTTTTTGCACGGGC	83451	Hs.647045	GO:0003674|GO:0005575|GO:0005739|GO:0008150|GO:0016787	abhydrolase domain-containing protein 11 isoform 2	115.566	63.5008	7.05421	5.58143	113.846	128.888	103.966	69.4978	59.5268	61.4779	7.17329	6.83945	7.14991	5.64164	5.59084	5.51181
ASHGA5P050478	0.0217789	0.0720188	2.13814	up	protein_coding	NM_033109	CCDS1856.1	PNPT1	RefSeq	4579	chr2	-	55861197	55921011		CGGAGTGAGCCAATCAGGGCACAGCCTGCGTTGACCGCGTGCCGGGTGTCATGGCGGCCT	87178	Hs.388733	GO:0000175|GO:0000957|GO:0000958|GO:0000962|GO:0000964|GO:0000965|GO:0004654|GO:0005515|GO:0005737|GO:0005739|GO:0005758|GO:0005886|GO:0006401|GO:0006402|GO:0008266|GO:0034046|GO:0034599|GO:0035198|GO:0035458|GO:0035927|GO:0035928|GO:0043457|GO:0043631|GO:0045025|GO:0045926|GO:0051260|GO:0061014|GO:0070207|GO:0070584|GO:0071042|GO:0071850|GO:0097222|GO:2000627|GO:2000772	polyribonucleotide nucleotidyltransferase 1, mitochondrial precursor	33.0326	28.4967	5.4292	4.33285	33.9213	28.9139	36.2624	31.5286	21.7091	32.2524	5.56883	4.93065	5.78813	4.43614	4.02765	4.53475
ASHGA5P015002	0.012226	0.0493773	2.40381	up	protein_coding	NM_001025096	CCDS45842.1	PSMA8	RefSeq	1827	chr18	+	23713815	23773319	NM_144662	TGACCATGTCTGCATGGCTTTTGCAGGACTTACTGCTGATGCTAGAGTAGTAATAAACAG	143471	Hs.464813	GO:0000075|GO:0000084|GO:0000209|GO:0000216|GO:0000278|GO:0002474|GO:0002479|GO:0004298|GO:0005634|GO:0005829|GO:0006521|GO:0006915|GO:0006977|GO:0010467|GO:0016032|GO:0016070|GO:0016071|GO:0019773|GO:0031145|GO:0034641|GO:0042590|GO:0042981|GO:0044281|GO:0051437|GO:0051439	proteasome subunit alpha type-7-like isoform 2	319.321	172.853	8.30845	7.04312	247.61	481.787	228.567	162.611	118.864	237.083	8.17552	8.57836	8.17145	6.93812	6.65772	7.53353
ASHGA5P010761	0.00141795	0.0143994	11.1557	up	protein_coding	NM_001001430	CCDS30969.1	TNNT2	RefSeq	1132	chr1	-	201328141	201346805	NM_001001431	GCTGTTGAAGAGCAGGAGGAGGCAGCGGAAGAGGATGCTGAAGCAGAGGCTGAGACCGAG	7139	Hs.533613	GO:0003779|GO:0005523|GO:0005829|GO:0005861|GO:0005865|GO:0006200|GO:0008016|GO:0016887|GO:0030017|GO:0030049|GO:0030049|GO:0030172|GO:0031013|GO:0032780|GO:0032781|GO:0051592|GO:0051592|GO:0055010	troponin T, cardiac muscle isoform 2	83.4909	12.2564	6.52075	3.04103	58.3814	133.52	58.5717	20.3239	11.4453	5	6.27913	6.88176	6.40136	3.73845	3.04187	2.34278
ASHGA5P006295	4.88494e-05	0.00308665	2.02375	up	protein_coding	NM_001012715		C9orf106	RefSeq	843	chr9	+	132083294	132084882		CTGAGACGAGGTGGCAGCGGGGACCACGTGAGATGGCGTATGTGGCCTTGAGCGATAAAC	414318	Hs.449434		putative uncharacterized protein C9orf106	34.375	30.2954	5.46567	4.44864	31.9439	42.8944	28.2869	33.1864	29.0906	28.6093	5.49045	5.44704	5.45952	4.51752	4.48407	4.34434
ASHGA5P031464	4.0639e-05	0.00291046	6.54345	up	protein_coding	NM_014353	CCDS10460.1	RAB26	RefSeq	1641	chr16	+	2198650	2204141		ACGGCCCAGGGCACGGCGGCTGCAGCGGGAGCACACTGAGCGCCCGCCCGCCATGTCCAG	25837	Hs.3797	GO:0005525|GO:0005525|GO:0005575|GO:0007264|GO:0008150|GO:0015031|GO:0017157|GO:0031226|GO:0035272	ras-related protein Rab-26	40.7602	11.6585	5.68626	2.97621	38.0237	50.8691	33.3879	14.5886	9.11428	11.2725	5.7214	5.6558	5.68157	3.23032	2.75793	2.94037
ASHGA5P054892	0.00358945	0.0238079	2.02015	up	protein_coding	ENST00000278829	CCDS8013.1	FADS3	GENCODE	1779	chr11	-	61640997	61659006		TGCGTGCAGCATGGGCGGCGTCGGGGAGCCGGGACCGCGGGAGGGACCCGCGCAGCCGGG	3995	Hs.21765	GO:0055114|GO:0006629|GO:0006810|GO:0022900|GO:0006636|GO:0006633|GO:0016021|GO:0005789|GO:0005624|GO:0003674|GO:0020037|GO:0005506|GO:0016717	fatty acid desaturase 3 [Source:HGNC Symbol;Acc:3576]	54.9428	45.1752	6.07341	5.05894	43.9028	66.7835	54.1422	52.1742	44.377	38.9743	5.91051	6.00845	6.30126	5.20729	5.14076	4.82878
ASHGA5P010234	0.000240115	0.00610396	4.10665	up	protein_coding	NM_025267	CCDS11447.1	PTGES3L-AARSD1	RefSeq	1800	chr17	-	41102542	41132020		GTGAGGGAAGGCAGCACGCCCGGACCTTGTGGTACGACAGGCCCAGGTATGTGTTCATGG	100885850			PTGES3L-AARSD1 protein isoform 2	80.7461	32.3188	6.59091	4.55295	72.0835	90.4273	79.7275	30.1464	34.2856	32.5244	6.56565	6.39192	6.81517	4.36751	4.74294	4.5484
ASHGA5P002854	0.000261635	0.00630315	3.23047	up	protein_coding	NM_001083910	CCDS42850.1	SIRPB1	RefSeq	1818	chr20	-	1545028	1600689	NM_006065	AACAGAAGGCCTGACTGACCCTCAGTCTCTGCTGCCTCCTCCTTTCTTGAGAAGCTCAGC	10326	Hs.664861	GO:0005515|GO:0005886|GO:0005887|GO:0007165|GO:0007166|GO:0016021	signal-regulatory protein beta-1 isoform 2 precursor	2868.1	1007.55	11.4432	9.75148	3054.06	2938.74	2611.51	1099.67	940.103	982.88	11.6072	11.1799	11.5425	9.81609	9.76168	9.67668
ASHGA5P034536	0.000643437	0.00963048	2.35171	up	protein_coding	ENST00000252575	CCDS12397.1	NCAN	GENCODE	6406	chr19	+	19322781	19363061		TTTGTCTGGGCCTTGGGCCTTTTGATGCTGCAGATGCTGCTCTTTGTGGCTGGGGAACAG	1463	Hs.169047	GO:0007411|GO:0007155|GO:0051823|GO:0005576|GO:0005515|GO:0005509|GO:0030246|GO:0005540	neurocan [Source:HGNC Symbol;Acc:2465]	129.854	81.995	7.2052	5.97148	127.347	143.846	118.37	86.8524	70.5088	88.6238	7.31538	6.98099	7.31923	5.98995	5.85733	6.06718
ASHGA5P025170	0.000332769	0.00701526	2.83948	up	protein_coding	NM_001001520	CCDS42472.1	HDGFRP2	RefSeq	2344	chr19	+	4472254	4502222	NM_032631	CGAGGAGAAGCTGGCCGGGGAGGAGCTGGCCGGGGAGGAGGCCCCCCAGGAGAAGGCGGA	84717	Hs.43071	GO:0003677|GO:0005634|GO:0006351	hepatoma-derived growth factor-related protein 2 isoform 1	247.863	115.774	7.98731	6.48169	207.048	353.8	182.741	137.046	96.9777	113.3	7.92703	8.15698	7.87793	6.67474	6.34286	6.42746
ASHGA5P007868	0.0277977	0.084762	2.13893	up	protein_coding	ENST00000337752	CCDS34232.1	C5orf56	GENCODE	2025	chr5	+	131746672	131798059		TGTAGCCTATTGGAGGAAAACACACCAAGGGAATCTTCAAACTCTTCTTCTCCACTGGCT				chromosome 5 open reading frame 56 [Source:HGNC Symbol;Acc:33838]	90.0541	64.5615	6.64536	5.54847	71.1682	137.508	61.486	49.5315	52.7645	91.3886	6.54906	6.92081	6.46621	5.12786	5.4056	6.11195
ASHGA5P005498	0.00065539	0.00970654	4.341	up	protein_coding	NM_183240	CCDS33281.1	TMEM37	RefSeq	1687	chr2	+	120189445	120196096		CGGCGTGCAGGCCCAGAGGCCTTTGGGCCAAAGGCAGCCCCGCCGGTCCTTCTTTGAATC	140738	Hs.26216	GO:0005244|GO:0005262|GO:0016021	voltage-dependent calcium channel gamma-like subunit	42.6033	18.3897	5.76337	3.64534	46.7328	43.8237	37.2535	18.2446	14.6978	22.2267	5.98907	5.4741	5.82693	3.56012	3.42159	3.9543
ASHGA5P037865	0.00137616	0.0142142	2.3256	up	protein_coding	NM_000496	CCDS13831.1	CRYBB2	RefSeq	781	chr22	+	25615611	25627836		AAACTTTCAAGGCCACTCGCATGAGCTCAATGGGCCCTGCCCCAACCTGAAGGAAACTGG	1415	Hs.373074	GO:0005198|GO:0005212|GO:0007601|GO:0042802|GO:0042803|GO:0043010|GO:0050896	beta-crystallin B2	104.49	69.6544	6.92586	5.70825	100.486	115.295	97.6884	74.5892	56.9098	77.4644	7.00109	6.69894	7.07754	5.74486	5.51721	5.86269
ASHGA5P051557	0.00191749	0.0167761	4.10362	up	protein_coding	NM_018725	CCDS2874.1	IL17RB	RefSeq	2072	chr3	+	53880576	53899827		CCCGCGCAGTGGCCCGGCGATGTCGCTCGTGCTGCTAAGCCTGGCCGCGCTGTGCAGGAG	55540	Hs.654970	GO:0001558|GO:0004896|GO:0005576|GO:0005737|GO:0005887|GO:0006952|GO:0009986|GO:0016020|GO:0019221	interleukin-17 receptor B precursor	19.009	8.28454	4.68767	2.65078	16.0821	17.3526	23.5922	7.70246	8.20098	8.95018	4.58601	4.26387	5.21314	2.58286	2.67766	2.69181
ASHGA5P018007	0.000440174	0.00801361	2.21686	up	protein_coding	NM_001142306	CCDS47353.1	C5orf60	RefSeq	1210	chr5	-	179068557	179072047		ATCACCAAACCCGACCAGCTCCACAGAATCCTTGGGGGAGACCCCACATGCAGGCAGGTG	285679	Hs.558748	GO:0016021	putative uncharacterized protein C5orf60	82.5122	57.9023	6.58991	5.4414	66.8803	106.462	74.1948	63.3102	57.7824	52.6144	6.46209	6.59332	6.71433	5.49889	5.54108	5.28422
ASHGA5P043611	0.00770325	0.0368698	3.42638	up	protein_coding	NM_001017404	CCDS30972.1	LGR6	RefSeq	3041	chr1	+	202183282	202288889		CTCAGCGAGGGCGGGACAGAACCTCTCCCGGGCTGGGAGTGCACGGCGCGGTGCGCCCAG	59352	Hs.497402	GO:0005886|GO:0016021|GO:0016500	leucine-rich repeat-containing G-protein coupled receptor 6 isoform 3	26.2224	14.1471	5.03722	3.26053	14.3008	35.5281	28.8383	15.5355	15.6098	11.2958	4.42716	5.19646	5.48802	3.32545	3.51323	2.94292
ASHGA5P014584	0.000534374	0.00889909	4.28759	up	protein_coding	NM_001164326	CCDS54907.1	BRD8	RefSeq	2998	chr5	-	137492572	137514358		TACTGTTGCAGCCTCCCCTGCTGCATCAGTGAGTCAACCCGACAACTGTGTTCCCATGGA	10902	Hs.519337	GO:0003700|GO:0004887|GO:0005634|GO:0005634|GO:0005730|GO:0005739|GO:0006355|GO:0006357|GO:0007165|GO:0007166|GO:0035267|GO:0040008|GO:0043967|GO:0043968	bromodomain-containing protein 8 isoform 4	1014.52	285.323	9.97218	7.87201	1072.16	993.298	978.092	302.753	274.633	278.584	10.1716	9.56789	10.177	7.88493	7.94429	7.78681
ASHGA5P054420	0.00125067	0.0134798	2.14263	up	protein_coding	ENST00000374694	CCDS7192.1	FZD8	GENCODE	3186	chr10	-	35927176	35930362		TACAACTACACCTACATGCCCAATCAGTTCAACCACGACACGCAAGACGAGGCGGGCCTG	8325	Hs.302634	GO:0000122|GO:0007409|GO:0007420|GO:0060070|GO:0030182|GO:0045944|GO:0009790|GO:0007166|GO:0001934|GO:0033077|GO:0043507|GO:0008406|GO:0001944|GO:0016021|GO:0005737|GO:0005886|GO:0042995|GO:0016020|GO:0005794|GO:0005515|GO:0005102|GO:0004930|GO:0017147|GO:0042813|GO:0030165|GO:0004888	frizzled family receptor 8 [Source:HGNC Symbol;Acc:4046]	52.8345	40.456	5.99196	4.89257	44.7775	74.0352	39.6908	37.2136	38.2798	45.8745	5.93246	6.14306	5.90035	4.6886	4.91455	5.07457
ASHGA5P036108	0.000770408	0.0106043	2.7113	up	protein_coding	NM_014474	CCDS30655.1	SMPDL3B	RefSeq	1890	chr1	+	28261503	28285663		GTGCCGGACGCCAGCGCCCACTCCATGCACACAGTGCTGGACCGCATCGCTGGCGACCAG	27293	Hs.123659	GO:0004767|GO:0005615|GO:0006685|GO:0016798	acid sphingomyelinase-like phosphodiesterase 3b isoform 1 precursor	19.0813	13.6851	4.65679	3.21781	16.2511	26.7515	14.2411	15.0486	14.5087	11.4979	4.60034	4.83155	4.53847	3.2803	3.40185	2.97126
ASHGA5P010735	0.00264626	0.0202744	2.9221	up	protein_coding	NM_052934	CCDS30990.1	SLC26A9	RefSeq	4815	chr1	-	205882176	205912588	NM_134325	TCACCCACTGCTTGTAAATGCCCCAGATATGAGCCAGCCCAGGCCCCGCTACGTGGTAGA	115019	Hs.164073	GO:0005886|GO:0006811|GO:0006821|GO:0006885|GO:0008271|GO:0015106|GO:0015301|GO:0016021|GO:0016324|GO:0055085	solute carrier family 26 member 9 isoform a	2267.45	884.718	11.1147	9.56771	2502.13	2101.73	2198.49	930.965	912.702	810.487	11.3416	10.6871	11.3154	9.57357	9.72209	9.40749
ASHGA5P019957	0.00326534	0.0227407	2.77122	up	protein_coding	NM_001163418	CCDS54879.1	FAM172A	RefSeq	4404	chr5	-	92953430	93447404	NM_001163417	TGGGGGCAGAGCTCAGATTTATTATCTAGGATAGATTTGGATGAACTAATGAAAAAAGAT	83989	Hs.600086	GO:0005576|GO:0005783	protein FAM172A isoform 3	28.7778	19.3482	5.18604	3.71551	25.5254	41.3152	19.4928	25.6294	16.0366	16.3787	5.1975	5.39701	4.96361	4.1083	3.55443	3.48381
ASHGA5P034668	0.00644122	0.0332525	2.79631	up	protein_coding	NM_001294	CCDS12651.1	CLPTM1	RefSeq	2531	chr19	+	45458598	45496604		CAGGAGGCGGACGGGGCCCGCAGCGCCGTGGTGGCGGCCGGGGGAGGCAGCTCCGGTCAG	1209	Hs.444441	GO:0005887|GO:0007275|GO:0009897|GO:0030154|GO:0033081	cleft lip and palate transmembrane protein 1	46.1563	28.4351	5.79068	4.30716	45.5154	64.9747	27.9787	38.635	23.7973	22.8729	5.9521	5.97383	5.44612	4.74787	4.17494	3.99866
ASHGA5P012854	0.000194333	0.00551271	2.45416	up	protein_coding	ENST00000381175	CCDS31338.1	TH	GENCODE	1898	chr11	-	2185158	2193035		GGCCATCATGGGCGCCCCGGGGCCCAGCCTCACAGGCTCTCCGTGGCCTGGAACTGCAGC	7054	Hs.435609	GO:0055114|GO:0044281|GO:0007605|GO:0007507|GO:0007601|GO:0032355|GO:0001666|GO:0009635|GO:0032496|GO:0034641|GO:0003007|GO:0071363|GO:0010259|GO:0021987|GO:0042755|GO:0009414|GO:0045471|GO:0035176|GO:0007617|GO:0007626|GO:0009416|GO:0051412|GO:0042462|GO:0006631|GO:0009887|GO:0014823|GO:0006665|GO:0048596|GO:0010043|GO:0051602|GO:0007613|GO:0001975|GO:0043434|GO:0071333|GO:0035690|GO:0031667|GO:…	tyrosine hydroxylase [Source:HGNC Symbol;Acc:11782]	38.4055	28.0495	5.6232	4.32798	34.7129	45.0368	35.4667	28.0389	25.334	30.7755	5.5984	5.50982	5.7614	4.25011	4.27546	4.45836
ASHGA5P049881	0.00020027	0.00559875	2.70193	up	protein_coding	NM_001164638	CCDS54174.1	ENDOV	RefSeq	1288	chr17	+	78388966	78404171		CAGGTGAGGGCCAGCCCCCACAGGACCACAGCCCAGGCCCCAGGACAGCCCCAAGGCCAG	284131	Hs.728933	GO:0000287|GO:0006281|GO:0016888	endonuclease V isoform 3	798.002	349.142	9.61072	8.17673	776.48	922.42	695.105	381.55	343.43	322.447	9.69942	9.47032	9.66242	8.2415	8.27876	8.00993
ASHGA5P038283	0.000199342	0.00558727	3.11094	up	protein_coding	NM_020925	CCDS628.2	CACHD1	RefSeq	5274	chr1	+	64936475	65158741		GTGCTGGCGAGCCAGATGCGGAGGCTGGCGGCCGAGGAGCTGGGGGTCGTCACCATGCAG	57685	Hs.443891	GO:0006816|GO:0016021	VWFA and cache domain-containing protein 1	42.6414	24.4114	5.73441	4.09706	36.8339	56.197	34.8934	26.0848	19.6089	27.5405	5.67725	5.78715	5.73884	4.13406	3.8707	4.28641
ASHGA5P010074	0.000829653	0.0109455	4.3723	up	protein_coding	NM_001699	CCDS12574.1	AXL	RefSeq	4716	chr19	+	41725107	41767671		TGGCGCCCAGTGAAGGAACCTTCAACTCCTGCCTTCTCGTGGCCCTGGTGGTATGTACTG	558	Hs.590970	GO:0001764|GO:0001779|GO:0001786|GO:0001961|GO:0001974|GO:0004714|GO:0005515|GO:0005524|GO:0005615|GO:0005887|GO:0006909|GO:0006954|GO:0007165|GO:0007167|GO:0007283|GO:0009986|GO:0021885|GO:0030168|GO:0031668|GO:0032689|GO:0032720|GO:0032825|GO:0032940|GO:0034101|GO:0034446|GO:0035457|GO:0042698|GO:0043277|GO:0043491|GO:0043524|GO:0045087|GO:0046982|GO:0048469|GO:0051250|GO:0051897|GO:0060068|GO:…	tyrosine-protein kinase receptor UFO isoform 2 precursor	939.264	261.741	9.85322	7.72483	1030.52	963.101	824.174	308.314	257.868	219.04	10.1131	9.52445	9.92211	7.91685	7.84897	7.40867
ASHGA5P008065	0.000805579	0.010807	2.05882	up	protein_coding	NM_001082959	CCDS45008.1	SCARB1	RefSeq	2630	chr12	-	125262173	125348519		TCCTGCTGCTGGTCCCTGTCATCTGCCAAATCCGGAGCCAAGGTCCTGAGGACACCGTGA	949	Hs.731377	GO:0001530|GO:0001786|GO:0001875|GO:0001935|GO:0005215|GO:0005545|GO:0005737|GO:0005886|GO:0005886|GO:0005887|GO:0005901|GO:0006629|GO:0006702|GO:0006707|GO:0007155|GO:0008035|GO:0009986|GO:0010595|GO:0010867|GO:0010886|GO:0010899|GO:0015914|GO:0015920|GO:0019048|GO:0030169|GO:0031528|GO:0031663|GO:0032497|GO:0033344|GO:0034185|GO:0034186|GO:0034375|GO:0034383|GO:0034384|GO:0042060|GO:0042157|GO:…	scavenger receptor class B member 1 isoform 2	1568.59	852.864	10.561	9.5192	1401.49	2195.07	1109.22	888.642	824.006	845.944	10.5638	10.7502	10.369	9.51238	9.57614	9.4691
ASHGA5P021925	0.0162675	0.0592919	2.13316	up	protein_coding	NM_001173514	CCDS54255.1	TYROBP	RefSeq	575	chr19	-	36395302	36399211	NM_001173515	GCTGTAAGTGATTGCAGTTGCTCTACGGTGAGCCCGGGCGTGCTGGCAGGGATCGTGATG	7305	Hs.515369	GO:0002281|GO:0002283|GO:0005057|GO:0005515|GO:0005622|GO:0005886|GO:0005887|GO:0006968|GO:0007165|GO:0007229|GO:0007411|GO:0035556|GO:0042802|GO:0050776	TYRO protein tyrosine kinase-binding protein isoform 3 precursor	9.43573	8.23321	3.74305	2.65006	6.54856	10.9474	10.8112	5	9.17883	10.5208	3.39982	3.66275	4.16659	2.34074	2.76522	2.84423
ASHGA5P052255	0.00161147	0.0152708	7.86127	up	protein_coding	NM_001017992	CCDS34163.1	ACTBL2	RefSeq	2812	chr5	-	56775842	56778636		ATCATGAAGTGCGATGTGGATATTCGCAAGGATCTCTATGCCAACACCGTGTTATCTGGA	345651	Hs.482167	GO:0005524|GO:0005737|GO:0005856	beta-actin-like protein 2	159.806	30.5728	7.36311	4.38835	95.0624	255.288	129.067	36.0232	18.3169	37.3784	6.92437	7.72251	7.44245	4.63864	3.76406	4.76234
ASHGA5P052514	5.62419e-06	0.00180355	3.1523	up	protein_coding	NM_006650	CCDS4396.1	CPLX2	RefSeq	4726	chr5	+	175223609	175311023	NM_001008220	AAGTAACCAGGCCTCCTGCCCCAGCCTACTCCACCTGTTACTACTTCTTTTTGGTTCTTT	10814	Hs.193235	GO:0005829|GO:0006904|GO:0007399|GO:0016079|GO:0017075|GO:0030154|GO:0030425|GO:0031201|GO:0031915|GO:0043025|GO:0043303|GO:0045202	complexin-2	8044.23	2942.43	12.9624	11.306	7710.29	9699	6723.4	2945.4	2765.8	3116.1	12.9587	13.002	12.9265	11.2395	11.2824	11.3962
ASHGA5P002421	6.25944e-06	0.00180355	15.0509	up	protein_coding	NM_025250	CCDS34588.1	TTYH3	RefSeq	4838	chr7	+	2671602	2704436		TCTACGACTGGTACAGGTGGCTGGGCTACCTGGGCCTGCTGCTGCTGGACGTCATCATCT	80727	Hs.440899	GO:0005254|GO:0005886|GO:0034707	protein tweety homolog 3	3750.34	296.681	11.8463	7.93456	3410.68	4069.29	3771.06	314.276	272.694	303.074	11.7791	11.6713	12.0886	7.94558	7.93485	7.92325
ASHGA5P000681	0.00114661	0.0128186	4.44258	up	protein_coding	NM_005565	CCDS47339.1	LCP2	RefSeq	2472	chr5	-	169675087	169724822		ATGTACATCGACCGGCCCCCCTCTGGGAAAACCCCCCAGCAGCCTCCTGTGCCCCCCCAG	3937	Hs.304475	GO:0005515|GO:0005829|GO:0006955|GO:0007169|GO:0007596|GO:0030168|GO:0045576|GO:0050663|GO:0050852	lymphocyte cytosolic protein 2	15486.7	4038.27	13.9212	11.7698	13595.3	14256.3	18608.5	4322.56	3748.59	4043.67	13.7599	13.5789	14.425	11.8173	11.7145	11.7778
ASHGA5P048630	0.00966508	0.0427354	2.27747	up	protein_coding	NM_001013642	CCDS41289.1	TRNP1	RefSeq	1949	chr1	+	27320194	27327377		GGGGCGGGGGATGCCGGGCTGCCGCATCAGCGCCTGCGGCCCGGGGGCCCAGGAGGGGAC	388610	Hs.355747	GO:0005634|GO:0007049	TMF-regulated nuclear protein 1	20.4618	17.6048	4.78846	3.60103	16.6579	21.5035	23.2239	15.3478	19.11	18.3565	4.63298	4.53964	5.19277	3.30908	3.83045	3.66357
ASHGA5P007354	0.00446018	0.0267141	2.51043	up	protein_coding	NM_198935	CCDS13491.1	SS18L1	RefSeq	4566	chr20	+	60718821	60757566		ATCCTGGAGTACCAGAGCAAGGGCAAGACGGCCGAGTGCACGCAGTACCAGCAGATCCTG	26039	Hs.154429	GO:0000777|GO:0000780|GO:0005634|GO:0006351|GO:0016358|GO:0016568|GO:0045893	calcium-responsive transactivator	14.0608	11.4292	4.29241	2.96447	14.0399	16.4015	11.741	10.1299	14.5695	9.58813	4.40174	4.19133	4.28415	2.7444	3.40782	2.74119
ASHGA5P008518	0.00506917	0.0287745	2.07648	up	protein_coding	NM_001143759	CCDS44496.1	LRRC27	RefSeq	1869	chr10	+	134145613	134166901		AAACTCGAATCATGGGCGTGGTAGGGCGTGCGCCTACACATATGGGAGAAGGAAGACAGC	80313	Hs.119897		leucine-rich repeat-containing protein 27 isoform c	100.169	71.8707	6.808	5.75385	92.559	140.297	67.6519	66.5402	60.8043	88.2675	6.88354	6.94727	6.59318	5.57435	5.62586	6.06135
ASHGA5P050736	1.2512e-05	0.00216313	3.10643	up	protein_coding	NM_052952	CCDS2296.1	DIRC1	RefSeq	1454	chr2	-	189598464	189654831		AACTAAGCCTTACCTAATTACAATGCCCTGCTGCTGCTCATCTCCCTTTATTCGTTTGTA	116093	Hs.470892		disrupted in renal carcinoma protein 1	5739.73	2148.51	12.4735	10.8382	5227.21	6780.11	5211.86	2293.55	1902.27	2249.73	12.4097	12.4491	12.5617	10.8762	10.7534	10.8851
ASHGA5P006409	0.000434748	0.00796553	2.07719	up	protein_coding	NM_001002862	CCDS33615.1	DERL3	RefSeq	3115	chr22	-	24176689	24181199		GACCCCTGGCTTCCTAAAGCTGCTCCTGGATGCCCCTGCAGAAGACCCCAATTACCTGCC	91319	Hs.593679	GO:0005515|GO:0018279|GO:0030176|GO:0030433|GO:0030433|GO:0030968	derlin-3 isoform 2	1193.64	668.439	10.2137	9.15911	1148.42	1376.5	1056	735.166	648.431	621.72	10.2738	10.0776	10.2898	9.22615	9.23461	9.01656
ASHGA5P045876	2.35384e-05	0.00251764	5.54147	up	protein_coding	NM_003692	CCDS6750.1	TMEFF1	RefSeq	2501	chr9	+	103235519	103339918		TGCTTCTGCTCTTCGCCTTCTCTCTGCCCGGGAGCCGCGCGTCCAACCAGCCCCCGGGTG	8577	Hs.598100	GO:0005886|GO:0007275|GO:0016021	tomoregulin-1 precursor	4999.62	1031.2	12.2534	9.78316	4991.01	5891.52	4116.31	1174.93	1001.12	917.562	12.3335	12.2244	12.2024	9.91606	9.85207	9.58135
ASHGA5P008899	9.70297e-05	0.00410335	19.444	up	protein_coding	NM_183228	CCDS11347.1	IKZF3	RefSeq	9518	chr17	-	37913967	38020441	NM_001257408, NM_001257410, NM_012481, NM_183230, NR_047559, NR_047560	AGCCATACTGTGGAGAAACCCTACAAATGTGAGTTTTGTGGAAGGAGTTACAAGCAGAGA	22806	Hs.444388	GO:0003700|GO:0005515|GO:0005634|GO:0005737|GO:0005886|GO:0006351|GO:0006357|GO:0007498|GO:0008270|GO:0030888|GO:0042113|GO:0042803|GO:0042981|GO:0043565|GO:0045577|GO:0045619|GO:0046982	zinc finger protein Aiolos isoform 2	1574.74	104.417	10.5765	6.29526	1265.8	2165.45	1292.99	142.19	94.7335	76.3275	10.4229	10.7288	10.5779	6.7356	6.31027	5.83991
ASHGA5P013897	0.00402813	0.0252829	2.2224	up	protein_coding	ENST00000397547	CCDS10429.1	SSTR5	GENCODE	2657	chr16	+	1122755	1131454		GGGCTCCCCCAGCCTGACGCACCCCAGGGCTGCCGCCATGGAGCCCCTGTTCCCAGCCTC	6755	Hs.449840	GO:0008285|GO:0007186|GO:0042593|GO:0071385|GO:0007193|GO:0050796|GO:0007187|GO:0016021|GO:0005737|GO:0005886|GO:0005887|GO:0004994	somatostatin receptor 5 [Source:HGNC Symbol;Acc:11334]	4431.44	2300.78	12.0881	10.936	4901.22	4213.75	4179.36	2417.42	2342.86	2142.06	12.3079	11.731	12.2254	10.9571	11.0486	10.8022
ASHGA5P016819	0.00270365	0.0205394	2.04691	up	protein_coding	ENST00000434608	CCDS2696.1	CCK	GENCODE	747	chr3	-	42299317	42305439		TGAGGAGTTCCCAAAGACCAGCCAGCCATGAACAGCGGCGTGTGCCTGTGCGTGCTGATG	885	Hs.458426	GO:0001764|GO:0007205|GO:0007409|GO:0008284|GO:0007165|GO:0043065|GO:0042755|GO:0001662|GO:0032099|GO:0051901|GO:0050731|GO:0001836|GO:0006919|GO:0051930|GO:0032461|GO:0005576|GO:0030424|GO:0005615|GO:0043195|GO:0043204|GO:0030425|GO:0043203|GO:0043194|GO:0005179|GO:0005184	cholecystokinin [Source:HGNC Symbol;Acc:1569]	103.152	76.4805	6.8951	5.86166	87.0628	117.321	105.074	77.2305	66.575	85.636	6.79826	6.72171	7.16533	5.80795	5.76699	6.01003
ASHGA5P032422	8.45479e-05	0.00389569	3.73402	up	protein_coding	NM_000526	CCDS11400.1	KRT14	RefSeq	1653	chr17	-	39738530	39743147		GGACACAGATCCCACTGGAAGATCCCCTCTCCTGCCCAAGCACTTCACAGCTGGACCCTG	3861	Hs.654380	GO:0005200|GO:0005515|GO:0005634|GO:0005730|GO:0005737|GO:0005829|GO:0005882|GO:0005882|GO:0008544|GO:0010043|GO:0010212|GO:0030855|GO:0031581|GO:0034329|GO:0045095|GO:0045110|GO:0071944	keratin, type I cytoskeletal 14	6657.11	2091.94	12.696	10.7953	6771.77	7170.21	6029.34	2283.03	2107.99	1884.82	12.7676	12.5458	12.7747	10.8687	10.9008	10.6164
ASHGA5P013106	0.00393069	0.0249104	2.46869	up	protein_coding	NM_001005335	CCDS33016.1	HNRNPL	RefSeq	1895	chr19	-	39327027	39342979		CGCCGAGCTGGAGAACTACGATGACCCGCACAAAACCCCTGCCTCCCCAGTTGTCCACAT	3191	Hs.644906	GO:0000166|GO:0000398|GO:0003723|GO:0005515|GO:0005634|GO:0005654|GO:0005737|GO:0006396|GO:0008380|GO:0010467|GO:0030529|GO:0044212|GO:0045120	heterogeneous nuclear ribonucleoprotein L isoform b	6477.37	3042.72	12.6412	11.3375	7218.72	6329.48	5883.91	3272.79	3334.65	2520.73	12.8551	12.3378	12.7309	11.4081	11.559	11.0454
ASHGA5P049104	0.00351851	0.0236014	3.2698	up	protein_coding	ENST00000219593	CCDS10596.1	ZP2	GENCODE	2266	chr16	-	21208772	21222868		TAAACATCAACGTTGAAAGCCTTACTCCTCCAGTGGCCTCAGTGAAGTTGGGTCCATTTA	7783	Hs.73982	GO:0006886|GO:0007339|GO:0016021|GO:0005886|GO:0005783|GO:0005794|GO:0005578|GO:0031012|GO:0030141|GO:0005771|GO:0015026|GO:0032190	zona pellucida glycoprotein 2 (sperm receptor) [Source:HGNC Symbol;Acc:13188]	339.353	138.196	8.4664	6.75719	376.21	321.235	320.614	149.901	150.243	114.444	8.73361	8.03155	8.63403	6.8123	7.01975	6.43953
ASHGA5P006209	0.000883542	0.0113583	2.16255	up	protein_coding	NM_001144895	CCDS45952.1	CD209	RefSeq	4052	chr19	-	7804880	7812464	NM_001144897, NM_001144899, NM_021155, NR_026692	ATACAAGAGCTTAGCAGGGTGTCTTGGCCATGGTCCCCTGGTGCTGCAACTCCTCTCCTT	30835	Hs.278694	GO:0005537|GO:0005576|GO:0005737|GO:0005886|GO:0006897|GO:0007157|GO:0007159|GO:0009988|GO:0016020|GO:0016021|GO:0019048|GO:0019062|GO:0019079|GO:0019882|GO:0030246|GO:0035556|GO:0042129|GO:0042605|GO:0045087|GO:0046790|GO:0046795|GO:0046872|GO:0046968	CD209 antigen isoform 7	227.066	142.048	7.92258	6.80984	215.768	249.769	215.662	143.996	136.153	145.997	7.98083	7.69026	8.09663	6.75367	6.86576	6.8101
ASHGA5P044015	0.00142378	0.0144247	5.81369	up	protein_coding	ENST00000467517	CCDS55183.1	NOS3	GENCODE	2377	chr7	+	150690891	150701023	ENST00000484524, NM_000603, NM_001160109	TGAGCAGCTGCTGAGTCAGGCCCGGGACTTCATCAACCAGTACTACAGCTCCATTAAGAG	4846	Hs.647092	GO:0055114|GO:0006809|GO:0016491|GO:0020037|GO:0050661|GO:0050660|GO:0005516|GO:0010181|GO:0004517	nitric oxide synthase 3 (endothelial cell) [Source:HGNC Symbol;Acc:7876]	39.7714	12.9944	5.66968	3.13023	41.7043	35.3872	42.2227	16.5278	13.2804	9.17498	5.83976	5.19228	5.977	3.41302	3.26895	2.70871
ASHGA5P019414	0.000852603	0.0111059	2.55904	up	protein_coding	NM_001014838	CCDS4779.1	CUTA	RefSeq	1041	chr6	-	33384318	33386065		CCTAAATCCCAGAGGTTGGCCCCCTGAGGTGCCTCTCTGCTCCTGTCTTTTGTTTGGATG	51596	Hs.520070	GO:0005515|GO:0008104|GO:0010038|GO:0016020|GO:0019899|GO:0051260	protein CutA isoform 2 precursor	1270.51	589.944	10.3161	8.96053	1251.96	1355.5	1204.09	621.141	500.884	647.809	10.4061	10.055	10.4873	8.97456	8.82912	9.07791
ASHGA5P047702	0.0252271	0.0793417	2.37588	up	protein_coding	NM_000681	CCDS7569.2	ADRA2A	RefSeq	3889	chr10	+	112836789	112840662		CTTGTCTGTTATCTGAGTTTTCAAAAGCTTTAAGACTCTGGGAACATCTGATTTTATGGA	150	Hs.249159	GO:0001819|GO:0004938|GO:0004938|GO:0005515|GO:0005737|GO:0005886|GO:0005887|GO:0006112|GO:0006928|GO:0007165|GO:0007186|GO:0007194|GO:0007265|GO:0007266|GO:0007596|GO:0008284|GO:0010700|GO:0010700|GO:0016323|GO:0019901|GO:0030036|GO:0030168|GO:0030335|GO:0030818|GO:0030818|GO:0031692|GO:0031696|GO:0031996|GO:0032147|GO:0032148|GO:0032795|GO:0032811|GO:0032870|GO:0035625|GO:0042593|GO:0042596|GO:…	alpha-2A adrenergic receptor	18.6596	16.0616	4.66888	3.42042	21.9293	16.4531	17.5963	21.4208	15.6071	11.1568	4.99223	4.19497	4.81945	3.82414	3.51311	2.92402
ASHGA5P046731	8.75228e-05	0.00395422	3.02083	up	protein_coding	NM_023934	CCDS14763.1	FUNDC2	RefSeq	2981	chrX	+	154255063	154285191		GCAGCCGCGGCGCGCCCGGCCCTCCCTCTTCCGCTGCCGCCGTGGGAATGGAAACATCTG	65991	Hs.356050	GO:0005739	FUN14 domain-containing protein 2	6034.81	2324.22	12.5506	10.9557	6107.76	6531.97	5464.69	2413.93	2348.83	2209.89	12.6209	12.3885	12.6425	10.9558	11.054	10.8572
ASHGA5P012710	0.000797243	0.0107828	2.011	up	protein_coding	NM_198270	CCDS14181.1	NHS	RefSeq	8776	chrX	+	17393542	17754113		AAGGACCGTCACTTTTTAACGTCCCATCCCCCAGAGGATGAAGATACAGATGTCATGTTA	4810	Hs.201623	GO:0002088|GO:0005634|GO:0030154	Nance-Horan syndrome protein isoform 1	766.04	447.338	9.56085	8.55293	687.436	873.521	737.163	454.213	410.362	477.439	9.53777	9.39102	9.75376	8.50913	8.53246	8.61721
ASHGA5P031825	0.00039818	0.00766904	3.11037	up	protein_coding	NM_199046	CCDS10790.1	TEPP	RefSeq	1638	chr16	+	58010338	58022017		TGGGCAGGGCGTCCGTGCTCCCCCGACTCACCGCGCCCCTATCCCTGCTGCCCGCCTCAG	374739	Hs.132976	GO:0005576	testis, prostate and placenta-expressed protein isoform 1 precursor	7258.96	2736.33	12.8245	11.1874	7650.26	7130.61	6995.99	2907.35	2680	2621.62	12.9429	12.5373	12.9934	11.2254	11.2295	11.1074
ASHGA5P010532	0.000462209	0.00826849	2.2295	up	protein_coding	NM_024526	CCDS813.1	EPS8L3	RefSeq	2247	chr1	-	110292701	110306644		TTTCCCTTCGGCCCTCCAGCCCCAAACCTGCCCAGCCAGCCCTGAAAATGCAAGTCTTGT	79574	Hs.485352	GO:0005737	epidermal growth factor receptor kinase substrate 8-like protein 3 isoform c	4610.9	2381.1	12.14	10.9833	4830.51	5177.79	3824.41	2580.89	2387.23	2175.18	12.2892	12.0166	12.1142	11.0462	11.0712	10.8325
ASHGA5P019472	0.00681285	0.0343745	4.6676	up	protein_coding	NM_153768	CCDS11882.1	CABYR	RefSeq	2279	chr18	+	21718954	21741564		GCTTATTTTCAAGAACTTACTATGTATAGAGTAGAGAAATGGTCAGAAGGAACGACACCA	26256	Hs.511983	GO:0001539|GO:0005509|GO:0005634|GO:0005730|GO:0005737|GO:0005856|GO:0007165|GO:0008603|GO:0017124|GO:0019861|GO:0019899|GO:0019901|GO:0019904|GO:0031514|GO:0035686|GO:0046982|GO:0048240	calcium-binding tyrosine phosphorylation-regulated protein isoform b	35.8427	13.4246	5.38837	3.16569	30.5366	58.3879	18.6035	20.5886	12.2489	7.43642	5.42964	5.83868	4.8968	3.75957	3.14152	2.59598
ASHGA5P010239	8.33665e-05	0.00386599	2.55742	up	protein_coding	NM_001079860	CCDS43921.1	GPR64	RefSeq	4829	chrX	-	19007424	19140755		TCTGTTGTCAGTTTTGCCCCCTCCTCCAATGGTACTCCAGATGTTACTTTAAGCTTACTC	10149	Hs.146978	GO:0004930|GO:0005737|GO:0005887|GO:0007186|GO:0007218|GO:0007283|GO:0016021|GO:0016324	G-protein coupled receptor 64 isoform 3 precursor	6146.26	2800.46	12.5764	11.2218	6419.93	6690.31	5328.56	3003.61	2670.95	2726.82	12.6952	12.4275	12.6067	11.2687	11.2212	11.1754
ASHGA5P051110	0.000709584	0.0101618	2.82507	up	protein_coding	NM_033088	CCDS30798.1	FAM40A	RefSeq	3290	chr1	+	110577222	110597263	NR_073071	GCGAGTTAAGCTGGGGGTGTGGAGCAGCCAAGATGGAGCCGGCAGTCGGCGGTCCGGGCC	85369	Hs.584996	GO:0003674|GO:0005515|GO:0005634|GO:0005737|GO:0022604|GO:0030866	protein FAM40A isoform 1	28.5989	19.1684	5.21491	3.71662	22.9668	36.9806	25.8491	23.3642	15.3962	18.7448	5.05586	5.24995	5.33892	3.96033	3.49236	3.69716
ASHGA5P054713	0.00373032	0.0243384	2.08566	up	protein_coding	NM_000990	CCDS7790.1	RPL27A	RefSeq	4906	chr11	+	8703994	8711419		TGGCCGATACCTCGCGAGACTTGGCGAAGGCCTTCCTTTTTCGTCTGGGCTGCCAACATG	6157	Hs.523463	GO:0000184|GO:0003723|GO:0003735|GO:0005515|GO:0005829|GO:0006412|GO:0006412|GO:0006413|GO:0006414|GO:0006415|GO:0006614|GO:0010467|GO:0016032|GO:0016070|GO:0016071|GO:0019058|GO:0019083|GO:0022625|GO:0044267	60S ribosomal protein L27a	592.098	345.613	9.20461	8.14411	553.169	696.293	526.833	328.173	276.353	432.312	9.2407	9.07394	9.29921	8.01258	7.9548	8.46495
ASHGA5P038302	0.00119982	0.0131129	2.40333	up	protein_coding	NM_015541	CCDS33783.1	LRIG1	RefSeq	4812	chr3	-	66429220	66550845		CTGCGGTGGGCGCGGGCTGGCTGCGTTGCCCGGGGACCTGCCCTCCTGGACGCGGAGCCT	26018	Hs.518055	GO:0016021	leucine-rich repeats and immunoglobulin-like domains protein 1 precursor	461.098	242.11	8.87149	7.60646	420.386	508.96	453.947	282.748	204.574	239.01	8.87971	8.64507	9.08969	7.77466	7.49903	7.54568
ASHGA5P026775	1.37452e-06	0.00126379	5.80998	up	protein_coding	NM_001541	CCDS8352.1	HSPB2	RefSeq	858	chr11	+	111783459	111784817		TTTGGACACAGAGGTCAATGAGGTCTACATCTCCCTGCTCCCTGCGCCTCCTGATCCAGA	3316	Hs.709660	GO:0005515|GO:0005634|GO:0005737|GO:0005829|GO:0006986|GO:0008047|GO:0043085	heat shock protein beta-2	21760.6	4507.55	14.4599	11.9213	22070.4	25509.7	17701.8	4785.91	4265.66	4471.07	14.5025	14.5233	14.3538	11.947	11.8935	11.9235
ASHGA5P019055	0.0167642	0.0605564	3.44186	up	protein_coding	NM_001173490	CCDS14239.1	PRRG1	RefSeq	4527	chrX	+	37208582	37316548		CAGGAAGGATTGGGGGAATCATCATCCAGGGACGTGCCAGAAACCACAAGAAAACATGGG	5638	Hs.190341	GO:0005509|GO:0005576|GO:0005887	transmembrane gamma-carboxyglutamic acid protein 1 isoform 1 precursor	46.6503	20.6054	5.61776	3.83458	19.88	88.2972	31.7737	18.7596	19.1105	23.9461	4.87034	6.36466	5.61829	3.60864	3.83057	4.06452
ASHGA5P050405	8.66667e-05	0.00394953	4.59489	up	protein_coding	NM_147152	CCDS46230.1	ITSN2	RefSeq	4597	chr2	-	24443187	24583397		TCGTCGTCGAGGTGAGGAGGCTGCTGCTGGCTAGCTCTCGGGGTATCTGCTGTCTCTCAT	50618	Hs.432562	GO:0005070|GO:0005089|GO:0005509|GO:0005543|GO:0005737|GO:0006897|GO:0035023	intersectin-2 isoform 2	356.774	104.003	8.52392	6.32389	303.271	422.093	344.957	122.905	90.4641	98.6398	8.43686	8.40163	8.73326	6.49757	6.24648	6.2276
ASHGA5P013791	0.00640734	0.0331488	6.49735	up	protein_coding	NM_001076677	CCDS43802.1	CLTA	RefSeq	1210	chr9	+	36190852	36212059		AACCCTTCGCTGACGTGATTGGTTATGTGGCAGCAGAAGAAGCCTTTGTAAATGACATTG	1211	Hs.522114	GO:0003674|GO:0005198|GO:0005829|GO:0005886|GO:0006886|GO:0006892|GO:0006897|GO:0007173|GO:0007411|GO:0016023|GO:0016044|GO:0019886|GO:0030118|GO:0030130|GO:0030132|GO:0030669|GO:0032588|GO:0042059|GO:0042277|GO:0048011	clathrin light chain A isoform c	319.304	68.0204	8.22952	5.52967	227.08	546.118	184.714	58.0457	36.6483	109.367	8.05742	8.73703	7.89411	5.36609	4.84908	6.37382
ASHGA5P038249	0.00438426	0.0264893	2.60894	up	protein_coding	NM_007024	CCDS2828.1	TMEM115	RefSeq	2178	chr3	-	50392179	50396939		AGATATGCCAGAAGACGGTGAAGCGCTACGATGTGGGTGCCCCATCCTCCATCACCATCA	11070	Hs.91566	GO:0001302|GO:0003674|GO:0005634|GO:0005794|GO:0008285|GO:0016021	transmembrane protein 115	2650.44	1155.88	11.3252	9.94172	3017.96	2405.43	2527.92	1239.6	1180.43	1047.62	11.5905	10.8891	11.496	9.99193	10.0706	9.76266
ASHGA5P053255	0.00119101	0.0130648	2.7009	up	protein_coding	NM_006754	CCDS5736.1	SYPL1	RefSeq	2335	chr7	-	105730813	105753093		GGGGAAGACCGAGTGCCAGGGGCTGAACCGCAGGGAAGGGGGCGCGGCGCACGCAGTATG	6856	Hs.80919	GO:0005215|GO:0005887|GO:0007268|GO:0008021|GO:0016021|GO:0030141|GO:0030659|GO:0042470	synaptophysin-like protein 1 isoform a	16.1787	11.7951	4.42777	2.99433	13.7221	23.1786	11.6354	14.5832	9.14731	11.6547	4.36967	4.64051	4.27314	3.23019	2.76187	2.99095
ASHGA5P050620	0.00367525	0.0241772	3.61072	up	protein_coding	NM_001164463	CCDS46394.1	RGPD8	RefSeq	7299	chr2	-	113125945	113191222	NM_001123363	GTAATGATTATTTTAATATTTCTATTAAAACTGTATATTTTTATGGCTGCTCTTTTATGT	727851	Hs.535589	GO:0000042|GO:0005643|GO:0008150|GO:0008536	RANBP2-like and GRIP domain-containing protein 8	4024.1	1308.44	11.9479	10.0956	4322.53	3881.62	3868.14	1282.47	1641.63	1001.23	12.1265	11.589	12.1282	10.0423	10.545	9.69942
ASHGA5P008335	0.000413187	0.00779637	4.53981	up	protein_coding	NM_207585	CCDS13621.1	IFNAR2	RefSeq	2898	chr21	+	34602230	34636820		AGAAATAGCCTCCCCAAAGTCTTGAATTTTCATAACTTTTTAGCCTGGCCATTTCCTAAC	3455	Hs.708195	GO:0004905|GO:0005515|GO:0005576|GO:0005615|GO:0005615|GO:0005886|GO:0005887|GO:0006357|GO:0007166|GO:0007259|GO:0008283|GO:0009615|GO:0019221|GO:0019901|GO:0019962|GO:0035455|GO:0060337|GO:0060338	interferon alpha/beta receptor 2 isoform a precursor	1671.33	436.258	10.6889	8.50632	1819.21	1746.67	1448.11	464.052	464.741	379.98	10.922	10.4071	10.7377	8.53738	8.72135	8.26022
ASHGA5P046045	0.020936	0.0701764	2.08366	up	protein_coding	ENST00000440944	CCDS48055.1	GPSM1	GENCODE	3633	chr9	+	139221931	139254057		CGGGAGGGCAGCCACTCCCCGCTGGACAGCGCCGACGTCCGGGTGCACGTGCCACGCACG	26086	Hs.239370	GO:0030154|GO:0007165|GO:0007399|GO:0008277|GO:0005634|GO:0005886|GO:0005829|GO:0005789|GO:0000139|GO:0005794|GO:0005515|GO:0005092|GO:0001965|GO:0030695	G-protein signaling modulator 1 [Source:HGNC Symbol;Acc:17858]	22.7052	19.8605	4.85126	3.79214	13.0771	31.8539	23.1845	20.2595	20.585	18.7369	4.30491	5.05785	5.19102	3.73309	3.94667	3.69666
ASHGA5P048827	0.0003131	0.0068552	2.40167	up	protein_coding	NM_000137	CCDS10314.1	FAH	RefSeq	1810	chr15	+	80445232	80478924		GCCACCTTAGGCCCGCAGCCGTGCCGGGTGCTCTTCAGCATGTCCTTCATCCCGGTGGCC	2184	Hs.73875	GO:0004334|GO:0005829|GO:0006527|GO:0006559|GO:0006559|GO:0006572|GO:0034641|GO:0044281|GO:0046872	fumarylacetoacetase	146.536	88.6255	7.35587	6.09184	127.386	172.105	140.117	95.3898	77.5458	92.9409	7.31567	7.20515	7.5468	6.12936	6.0096	6.13654
ASHGA5P051497	0.00122711	0.0133111	3.03714	up	protein_coding	NM_033629	CCDS2769.1	TREX1	RefSeq	1515	chr3	+	48507228	48509044	NM_016381	TCAGCAGCAGGTACGTACCCAACCATGGGCTCGCAGGCCCTGCCCCCGGGGCCCATGCAG	11277	Hs.707026	GO:0003690|GO:0003697|GO:0005635|GO:0006260|GO:0006281|GO:0006298|GO:0006310|GO:0008219|GO:0008296|GO:0008408|GO:0008408|GO:0008853|GO:0032405|GO:0032407|GO:0032558|GO:0035458|GO:0042803|GO:0042803|GO:0046872|GO:0046872	three prime repair exonuclease 1 isoform b	241.98	109.825	8.01164	6.40892	260.672	238.101	227.168	111.504	101.122	116.85	8.2454	7.62819	8.16132	6.35049	6.40504	6.47124
ASHGA5P007385	0.0125981	0.0503692	2.4189	up	protein_coding	NM_014653	CCDS41828.1	WSCD2	RefSeq	4650	chr12	+	108523510	108644313		AAGGGCAAAGAGTGGCCAGAGTTCGTGAGGAACTATGCCCCGTGGTGGGCCACTCACACA	9671	Hs.143591	GO:0016021	WSC domain-containing protein 2	8.70297	5	3.61768	2.34333	12.1217	8.20792	5.77924	5	5	5	4.20697	3.27351	3.37255	2.34074	2.34646	2.34278
ASHGA5P016425	0.00015239	0.005002	2.53551	up	protein_coding	NM_001145662	CCDS46903.1	GATA2	RefSeq	3263	chr3	-	128198264	128206764		TGGGCAGAACCGACCACTCATCAAGCCCAAGCGAAGACTGACGACAACCACCACCTTATG	2624	Hs.367725	GO:0000122|GO:0000980|GO:0001077|GO:0001158|GO:0001655|GO:0001709|GO:0001892|GO:0003682|GO:0003700|GO:0005515|GO:0005634|GO:0005654|GO:0005730|GO:0006351|GO:0006909|GO:0007596|GO:0008134|GO:0008270|GO:0021514|GO:0021533|GO:0021954|GO:0021983|GO:0035019|GO:0035065|GO:0035854|GO:0042472|GO:0043234|GO:0045599|GO:0045648|GO:0045650|GO:0045654|GO:0045746|GO:0045766|GO:0045944|GO:0045944|GO:0045944|GO:…	endothelial transcription factor GATA-2 isoform 2	45.2956	31.0344	5.82053	4.47825	43.5556	56.7567	35.5746	35.5995	26.1262	31.3775	5.89698	5.7993	5.76531	4.62233	4.31982	4.49261
ASHGA5P005177	0.00240386	0.0191335	2.89018	up	protein_coding	NM_000508	CCDS3787.1	FGA	RefSeq	3655	chr4	-	155504279	155511897		CCTGTCAGAGACTGTGATGATGTCCTCCAAACACATCCTTCAGGTACCCAAAGTGGCATT	2243	Hs.351593	GO:0002576|GO:0005102|GO:0005515|GO:0005576|GO:0005576|GO:0005577|GO:0005615|GO:0005886|GO:0005938|GO:0007165|GO:0007596|GO:0009897|GO:0030168|GO:0030674|GO:0031091|GO:0031093|GO:0043499|GO:0051258|GO:0051592	fibrinogen alpha chain isoform alpha-E preproprotein	60.963	35.2096	6.21019	4.67904	72.4492	62.9204	47.5195	37.4621	37.301	30.8658	6.57205	5.92988	6.12865	4.69892	4.87503	4.46317
ASHGA5P010345	0.00260466	0.0200809	3.34314	up	protein_coding	NM_001091	CCDS43679.1	ABP1	RefSeq	2438	chr7	+	150549572	150558379		GAGCACACAGAGCCGTGGAGCGAGAGATGCCGGCCCTGGGCTGGGCCGTGGCTGCCATCC	26	Hs.647097	GO:0004872|GO:0005261|GO:0005272|GO:0005507|GO:0005509|GO:0005615|GO:0005777|GO:0005886|GO:0005923|GO:0008131|GO:0008144|GO:0008201|GO:0008270|GO:0009308|GO:0032403|GO:0035725|GO:0035874|GO:0042493|GO:0042803|GO:0046677|GO:0048038|GO:0052597|GO:0052598|GO:0052599|GO:0052600|GO:0055114|GO:0071280|GO:0071420|GO:0071504|GO:0097185	amiloride-sensitive amine oxidase [copper-containing] precursor	14.6699	7.4375	4.31864	2.57743	9.98777	17.4151	16.6069	5	7.47515	9.83737	3.94943	4.26921	4.73727	2.34074	2.62838	2.76318
ASHGA5P007871	0.000345023	0.00715543	3.33988	up	protein_coding	ENST00000337801	CCDS2542.1	AQP12A	GENCODE	1084	chr2	+	241631261	241637900		CCGGGAGGCGATGAGGACGCTGGTCGAGCTCGGGCCCTGGGCTGGGGACTTTGGGCCTGA	375318	Hs.534650	GO:0006810|GO:0016021|GO:0016020|GO:0005215	aquaporin 12A [Source:HGNC Symbol;Acc:19941]	43.3132	22.6447	5.73211	3.99231	31.3803	60.1597	38.3996	25.8985	21.1946	20.841	5.46415	5.87306	5.85911	4.1219	3.99193	3.8631
ASHGA5P045446	0.00133232	0.0139425	2.80846	up	protein_coding	NM_014368	CCDS6838.2	LHX6	RefSeq	3444	chr9	-	124964855	124991091	NM_199160	GCCCCGGCGTTGCCCGAGGGCTGCCGGCTGCCGGCCGAGGGCGGCCCCGCCACCGACCAG	26468	Hs.103137	GO:0003700|GO:0005634|GO:0006351|GO:0008270|GO:0021799|GO:0021800|GO:0021853|GO:0021877|GO:0021884|GO:0043565|GO:0048469	LIM/homeobox protein Lhx6 isoform 1	13.6986	8.69688	4.1813	2.69152	9.9721	20.9639	10.1597	11.1793	6.93666	7.97467	3.94632	4.50794	4.08964	2.85013	2.5932	2.63124
ASHGA5P051857	1.21573e-06	0.00125934	3.36293	up	protein_coding	NM_207044	CCDS963.1	ENSA	RefSeq	2883	chr1	-	150595753	150602098	NM_207043, NM_207047	AGCTTGCGGGGTAACCTGAGCCCCCCTCTCCTCCCCTTCCTCAACCACTGGACGTTTATA	2029	Hs.632456	GO:0000086|GO:0004864|GO:0005102|GO:0005737|GO:0006810|GO:0007067|GO:0007584|GO:0008200|GO:0008601|GO:0019212|GO:0051301|GO:0051721	alpha-endosulfine isoform 4	85163.5	35008.1	16.6424	14.8927	85219.4	91628.6	78642.5	36582.8	35577.8	32863.7	16.6415	16.6143	16.6713	14.9537	14.8852	14.839
ASHGA5P002985	0.00124074	0.0134095	2.38798	up	protein_coding	NM_006433	CCDS1984.1	GNLY	RefSeq	751	chr2	+	85921413	85925875		GGCAACCCAGGTCTGGTCTTCTCTCGTCTGAGCCCTGAGTACTACGACCTGGCAAGAGCC	10578	Hs.105806	GO:0005615|GO:0006968|GO:0031640|GO:0042742|GO:0050832	granulysin isoform NKG5 precursor	175.201	104.092	7.58573	6.32995	176.46	195.277	153.865	114.342	105.56	92.3736	7.72697	7.35974	7.67049	6.39109	6.47124	6.12751
ASHGA5P041700	0.00236787	0.0190221	5.42785	up	protein_coding	ENST00000377364	CCDS4572.1	HIST1H4B	GENCODE	357	chr6	-	26027123	26027480		GTTAAGCGAATTTCCGGTTTGATTTATGAGGAGACTCGTGGCGTTCTCAAGGTGTTTCTG	8366	Hs.143080	GO:0006352|GO:0048015|GO:0006334|GO:0000723|GO:0006325|GO:0034080|GO:0045653|GO:0005634|GO:0005576|GO:0000786|GO:0005654|GO:0003677|GO:0005515	histone cluster 1, H4b [Source:HGNC Symbol;Acc:4789]	192.238	53.0987	7.68719	5.24681	181.309	245.966	149.439	62.3486	64.3294	32.618	7.76037	7.66946	7.63175	5.47362	5.71393	4.55288
ASHGA5P006849	0.0312333	0.0917926	2.56642	up	protein_coding	NM_001178098	CCDS53998.1	CD19	RefSeq	1968	chr16	+	28943259	28950668	NM_001770	AGTCAATGTGGAGGGCAGCGGGGAGCTGTTCCGGTGGAATGTTTCGGACCTAGGTGGCCT	930	Hs.652262	GO:0005057|GO:0005886|GO:0005887|GO:0006968|GO:0007166|GO:0009897|GO:0050776|GO:0050853	B-lymphocyte antigen CD19 isoform 1 precursor	11.5453	7.16716	3.93241	2.57265	5.67446	13.3387	15.6228	9.31138	5.23722	6.95287	3.22234	3.92078	4.65409	2.68072	2.47113	2.56608
ASHGA5P005275	0.000193015	0.00549545	4.42949	up	protein_coding	NM_024809	CCDS9253.1	TCTN2	RefSeq	2930	chr12	+	124155659	124192950	NM_001143850	TGTGATGTTCGCTGCTGCTGTGACCAGGAATGCTCATCAAATTTAACAACGCTGTTCAGA	79867	Hs.167165	GO:0005932|GO:0007224|GO:0016021|GO:0036038|GO:0042384|GO:0060271	tectonic-2 isoform 1 precursor	392.915	113.884	8.61458	6.46745	297.258	544.212	337.275	118.951	122.057	100.645	8.41091	8.73015	8.70269	6.44858	6.69684	6.25691
ASHGA5P054694	0.00028507	0.0065583	5.73336	up	protein_coding	NM_032127	CCDS7760.1	FAM160A2	RefSeq	3507	chr11	-	6232563	6255941		AGCATGCCTCATGGGCACGAGGTGGGCCTAGCAGAGAGACAGGGAGAAGGGAGGACATCA	84067	Hs.501793	GO:0005515|GO:0007032|GO:0007040|GO:0008333|GO:0015031|GO:0045022|GO:0070695	FTS and Hook-interacting protein isoform 1	24.3428	5.66681	4.92938	2.41	16.1169	38.0573	18.8543	7.00043	5	5	4.58905	5.28566	4.91344	2.54076	2.34646	2.34278
ASHGA5P005482	0.00223231	0.0183353	7.69077	up	protein_coding	NM_139278	CCDS6025.1	LGI3	RefSeq	3285	chr8	-	22004342	22014344		TCATCTCCCTGACCCTGGTGAATGCCGCCTTCTCAGAGATCCAGGATGGAGCGTTCTCCC	203190	Hs.33470	GO:0005576|GO:0006887|GO:0008021|GO:0030054|GO:0043005	leucine-rich repeat LGI family member 3 precursor	11370.8	1549.25	13.3073	10.3642	11305.6	17729.3	5077.45	1542.45	1419.56	1685.73	13.4746	13.9367	12.5107	10.295	10.3485	10.449
ASHGA5P003683	0.00147628	0.0146022	2.5312	up	protein_coding	NM_175924	CCDS3008.1	ILDR1	RefSeq	2776	chr3	-	121706169	121741127		TCCTGAGGAAGATTTGTCCCTGCCGTCCAGCCTCCCGCAGATGCCAATGACCCAGACCAC	286676	Hs.98484	GO:0005829|GO:0005886|GO:0016021	immunoglobulin-like domain-containing receptor 1 isoform 2 precursor	2296.93	1043.11	11.1374	9.79758	2471.27	2301.43	2118.1	1046.74	1070.69	1011.9	11.3204	10.8231	11.2687	9.74846	9.93416	9.71012
ASHGA5P025240	0.000188122	0.0054152	3.83695	up	protein_coding	NM_001267716		ZNF728	RefSeq	2632	chr19	-	23157684	23186010		TGAGCTGGTGAAAGAACCGCCAGTTATATGTTCTCATTTTGCTCAAGACCTTTGGCCAGA	388523	Hs.616766		zinc finger protein 43	273.724	97.6843	8.17893	6.23897	280.275	295.283	245.613	104.587	97.5427	90.9236	8.34005	7.92652	8.27023	6.25927	6.35174	6.10592
ASHGA5P045979	0.00104426	0.0122245	2.82602	up	protein_coding	NM_001006641	CCDS35151.1	SLC25A25	RefSeq	3446	chr9	+	130830478	130871537		GGGACGGCGGCCTGTGTGTCAACGACCTGGCGGTGGGGCTGCGGCGCCTGGGACTGCACC	114789	Hs.5476	GO:0005509|GO:0005743|GO:0016021|GO:0055085	calcium-binding mitochondrial carrier protein SCaMC-2 isoform b	93.863	52.51	6.76419	5.26542	78.3134	119.685	83.5907	63.7965	39.2361	54.4975	6.66667	6.74606	6.87985	5.51094	4.9525	5.33282
ASHGA5P004421	0.000714191	0.0101773	2.65407	up	protein_coding	NM_003283	CCDS12917.1	TNNT1	RefSeq	1059	chr19	-	55644160	55660606		AACAGCTCCGGGCCCGGTCTGCCTGGCTGCCTCCATCACAGCCCTCCTGCCCTGCCAGGG	7138	Hs.631558	GO:0003009|GO:0005523|GO:0005829|GO:0005861|GO:0005861|GO:0030049|GO:0031014|GO:0031444|GO:0045932	troponin T, slow skeletal muscle isoform a	2794.24	1209.5	11.4068	9.99859	2913.33	2869.33	2600.07	1369.34	1131.87	1127.29	11.5407	11.1441	11.5357	10.1192	10.0065	9.87007
ASHGA5P054473	0.00116077	0.0129167	3.79873	up	protein_coding	NM_001080449	CCDS44415.1	DNA2	RefSeq	4287	chr10	-	70173820	70231730		TTCTAAGCTTTCTGTGTTACCCCCGGTTCCGCTGTCTTTTCTGTCTACAGTTTGCGATCC	1763	Hs.532446	GO:0000076|GO:0000084|GO:0000278|GO:0000722|GO:0000723|GO:0000729|GO:0003677|GO:0003678|GO:0003678|GO:0004386|GO:0004518|GO:0005515|GO:0005524|GO:0005634|GO:0005654|GO:0005760|GO:0006200|GO:0006260|GO:0006264|GO:0006271|GO:0006284|GO:0016887|GO:0016890|GO:0017108|GO:0032201|GO:0032508|GO:0033567|GO:0042645|GO:0043137|GO:0043139|GO:0043142|GO:0043504|GO:0045740|GO:0046872|GO:0051539	DNA2-like helicase	8589.36	2635.07	13.0374	11.1119	10512.6	8755.56	6499.92	3046.01	2744.19	2115.02	13.3645	12.8691	12.8786	11.2854	11.2687	10.7815
ASHGA5P053625	0.00167546	0.0155637	2.51133	up	protein_coding	NM_001145355	CCDS47948.1	CBWD1	RefSeq	1838	chr9	-	121037	179075	ENST00000377457, NM_001024916, NM_001145356, NM_018491, NM_172003, NM_201453	CATTGTTATTAAATTTTTTTAACACAAGTAAGTGTCACCATTTTATGACATGAAATAAAA	55871	Hs.531330	GO:0005524	COBW domain-containing protein 1 isoform 2	13776.2	6475.08	13.7631	12.4346	14583.6	13949.5	12795.5	6253.96	7563.95	5607.32	13.8685	13.5537	13.867	12.3401	12.7145	12.2493
ASHGA5P011903	0.00187917	0.016616	2.56506	up	protein_coding	NM_032513	CCDS272.1	SLC30A2	RefSeq	2326	chr1	-	26364513	26372604		TCGGAGAAGTCGTTGAGATCTTGGGAGCCCTGGTCTCTGTACTGTCCATCTGGGTCGTGA	7780	Hs.143545	GO:0005385|GO:0005765|GO:0005770|GO:0010008|GO:0016021|GO:0016023|GO:0044444|GO:0055085|GO:0061090	zinc transporter 2 isoform 2	271.418	142.231	8.17106	6.81207	272.418	273.794	268.04	140.348	141.249	145.097	8.30489	7.82187	8.38642	6.71352	6.92279	6.79988
ASHGA5P018926	0.00456728	0.0270315	3.05496	up	protein_coding	NM_180977	CCDS43464.1	PPP2R5D	RefSeq	2649	chr6	+	42952236	42980083		AAACTGAAAAAGGAGAAGGAGCTGTTTATCCAGAAGCTACGCCAGTGCTGTGTCCTCTTT	5528	Hs.533308	GO:0000159|GO:0005515|GO:0005634|GO:0005737|GO:0007165|GO:0007399|GO:0008601	serine/threonine-protein phosphatase 2A 56 kDa regulatory subunit delta isoform isoform 3	30.5001	18.3977	5.27012	3.65896	18.9058	39.0117	33.5829	22.046	16.7349	16.4123	4.80223	5.3196	5.68853	3.87124	3.61938	3.48627
ASHGA5P017062	0.000165581	0.00519333	2.72476	up	protein_coding	ENST00000437219	CCDS54061.1	WDR81	GENCODE	3184	chr17	+	1619816	1641893		TTCCCAGAACCCAGCGCGCTCTATACAGCCTGCAAGATGGTCCGCTGGCTGTCTGCCAAG	124997	Hs.234572	GO:0010923|GO:0005515	WD repeat domain 81 [Source:HGNC Symbol;Acc:26600]	33.0124	22.4365	5.42454	3.97841	31.679	38.1629	29.1953	21.3415	22.335	23.6328	5.48006	5.28829	5.50528	3.81814	4.0726	4.0445
ASHGA5P011727	0.00385795	0.0247463	2.08801	up	protein_coding	ENST00000453908	CCDS53298.1	SH3D21	GENCODE	2519	chr1	+	36771993	36786948		CGCCGCCGAGGTCATCCTGCCAAACACCCGAGGCCCCAAAGATGGTGCAAAGTGAACTTC	79729	Hs.524496	GO:0005515	SH3 domain containing 21 [Source:HGNC Symbol;Acc:26236]	55.9356	44.8757	6.11458	5.05245	56.2	56.2552	55.3514	51.0598	39.8967	43.6706	6.22619	5.7887	6.32885	5.17491	4.9788	5.00365
ASHGA5P041132	0.00262992	0.0202035	9.76637	up	protein_coding	NM_001098728	CCDS43325.1	GTF2H2C	RefSeq	2106	chr5	+	68856050	68888729	NM_001515, NR_033417	AAGTTAAGTCTGAATGTAAATTCAGTGTAAGATGAAAATTTATCAATACTTATGAAATTA	728340	Hs.422901		general transcription factor IIH subunit 2-like protein	82.9602	14.18	6.526	3.23818	132.41	63.565	52.9054	15.441	9.37613	17.723	7.36534	5.9437	6.26896	3.31706	2.7863	3.61117
ASHGA5P009982	0.00355442	0.0237291	2.521	up	protein_coding	NM_138319		PCSK6	RefSeq	4520	chr15	-	101844132	102030187	NM_138321	GATTACACAGGTGTGTGCCATCCGGAGTGTGGTGACAAAGGCTGTGATGGCCCCAATGCA	5046	Hs.498494	GO:0004175|GO:0004252|GO:0005615|GO:0005783|GO:0005796|GO:0006508|GO:0008201|GO:0009100|GO:0009986|GO:0012505|GO:0016020|GO:0016485|GO:0016486|GO:0030510|GO:0031012|GO:0032455|GO:0032902|GO:0032940|GO:0043499|GO:0048011|GO:0048406	proprotein convertase subtilisin/kexin type 6 isoform b preproprotein	14.1872	11.4643	4.29187	2.95788	10.6835	15.5259	16.3523	12.6691	10.8378	10.8861	4.03994	4.11873	4.71696	3.02047	2.96292	2.89023
ASHGA5P048949	0.000401271	0.00770797	2.38159	up	protein_coding	ENST00000251595	CCDS10398.1	HBA2	GENCODE	605	chr16	+	222845	223709		CCTCCTCCCCTCCTTGCACCGGCCCTTCCTGGTCTTTGAATAAAGTCTGAGTGGGCAGCA	3040	Hs.654744	GO:0042744|GO:0051291|GO:0042542|GO:0010942|GO:0015671|GO:0022627|GO:0005833|GO:0031838|GO:0005515|GO:0004601|GO:0020037|GO:0005506|GO:0005344|GO:0019825|GO:0031720	hemoglobin, alpha 2 [Source:HGNC Symbol;Acc:4824]	80509.2	46041.3	16.5389	15.287	77558.3	97588.7	66380.6	48999.8	45933.7	43190.5	16.4648	16.7577	16.3943	15.3434	15.2588	15.2588
ASHGA5P002308	0.000221356	0.00583783	6.74357	up	protein_coding	NM_001703	CCDS346.2	BAI2	RefSeq	5434	chr1	-	32192717	32229648		AGGTTGGATGGGCAAGGGACATAGGATGACCCCAGCCTGTCCCCTCTTACTGTCTGTGAT	576	Hs.524138	GO:0004930|GO:0005886|GO:0007186|GO:0007218|GO:0016021|GO:0016525	brain-specific angiogenesis inhibitor 2 precursor	1271.51	232.249	10.3086	7.5551	1362.38	1226.45	1225.71	239.139	229.399	228.21	10.5218	9.89169	10.5124	7.51764	7.6716	7.47606
ASHGA5P015784	0.010551	0.0451054	2.31772	up	protein_coding	NM_001105543	CCDS43647.1	PLXNA4	RefSeq	3408	chr7	-	132068246	132261323		AAGTGGCAAGCTGAAGAAGATGCCTGGTACCAGCCTCTGCCCTACCCTTGAGCTACAGAC	91584	Hs.511454	GO:0002116|GO:0004872|GO:0005622|GO:0005886|GO:0007411|GO:0016021|GO:0071526	plexin-A4 isoform 3 precursor	1110.25	558.985	10.1025	8.88976	1271.19	999.609	1059.95	605.708	522.72	548.528	10.4337	9.57693	10.2968	8.93695	8.90077	8.83157
ASHGA5P037721	0.000406045	0.00776225	2.16818	up	protein_coding	NM_001025161	CCDS33657.1	CYP2D6	RefSeq	1520	chr22	-	42522500	42526883	NM_000106	AGCCACCATGGTGTCTTTGCTTTCCTGGTGACCCCATCCCCCTATGAGCTTTGTGCTGTG	1565	Hs.648256	GO:0004497|GO:0005506|GO:0005739|GO:0005783|GO:0005789|GO:0006805|GO:0008144|GO:0008202|GO:0009055|GO:0009804|GO:0009820|GO:0009822|GO:0016098|GO:0016491|GO:0017144|GO:0017144|GO:0020037|GO:0033076|GO:0042737|GO:0044281|GO:0046483|GO:0051100|GO:0055114|GO:0070330|GO:0070989|GO:0090350	cytochrome P450 2D6 isoform 2	4447.02	2366.4	12.0952	10.9787	4455.49	4751.81	4133.75	2358.37	2309.48	2431.35	12.176	11.9024	12.2071	10.9138	11.0303	10.992
ASHGA5P034184	0.0102187	0.0442481	2.14806	up	protein_coding	NM_199126	CCDS12499.1	ZNF585A	RefSeq	4107	chr19	-	37641000	37663333	NM_152279, NM_152655	AATGCAATACTTGTGGAAAAGCCTTCACTCAGAAGTCACACCTCAATATACATCAGAAAA	199704	Hs.729172	GO:0003676|GO:0005634|GO:0006351|GO:0006355|GO:0008270	zinc finger protein 585A	337.881	200.931	8.39251	7.28948	247.453	499.736	266.454	228.318	137.914	236.561	8.17411	8.62482	8.37861	7.45161	6.88637	7.53045
ASHGA5P047668	6.89076e-05	0.00350444	2.16728	up	protein_coding	NM_001083913	CCDS44473.1	WBP1L	RefSeq	4123	chr10	+	104503726	104576021		GCGCTCCTGCTCCTCCAGGCGCTGCCCAGCCCCTTGTCAGCCAGGGCTGAACCCCCGCAG	54838	Hs.500897	GO:0016021	WW domain binding protein 1-like isoform 1 precursor	2703.4	1425.15	11.3546	10.2387	2719.71	3106.03	2284.45	1557.91	1312.37	1405.16	11.4468	11.2559	11.3612	10.3044	10.2263	10.1853
ASHGA5P034792	0.038264	0.105055	2.98026	up	protein_coding	NM_018337	CCDS12939.1	ZNF444	RefSeq	2080	chr19	+	56652534	56672262	NM_001253792	ATGTGACGCAGGGCCCTGGGGCCACAGGTGGAAAGGAGGACAGTGGGATGATTCCCTTAG	55311	Hs.24545	GO:0003677|GO:0003700|GO:0005634|GO:0006351|GO:0008270|GO:0016032	zinc finger protein 444 isoform 1	28.1634	19.3199	5.2097	3.63427	28.5542	32.6105	23.3255	20.9418	28.2005	8.81748	5.34382	5.08648	5.19881	3.78801	4.43454	2.68025
ASHGA5P004882	1.41537e-05	0.00221638	2.51691	up	protein_coding	NM_001105521	CCDS44494.1	JAKMIP3	RefSeq	6488	chr10	+	133918312	133998313		AAGAAAGAAAATGGCAAAACTTCCCAAGCCGGTGGTTGTGGAGACCTTCTTTGGATACGA	282973	Hs.106254	GO:0005794|GO:0008017|GO:0019900	janus kinase and microtubule-interacting protein 3	23.0508	17.7209	4.94396	3.61231	20.0419	28.464	20.6466	18.701	17.0106	17.4511	4.87959	4.91183	5.04045	3.60427	3.64667	3.58598
ASHGA5P002642	0.000146011	0.0049456	3.43018	up	protein_coding	NM_003486	CCDS10964.1	SLC7A5	RefSeq	4543	chr16	-	87863628	87903100		CTCTGCGTGCTGCTGCTCACGGCCGTGAACTGCTACAGCGTGAAGGCCGCCACCCGGGTC	8140	Hs.513797	GO:0005829|GO:0005886|GO:0006520|GO:0006810|GO:0006811|GO:0006865|GO:0007399|GO:0007596|GO:0015171|GO:0015175|GO:0015179|GO:0015804|GO:0016021|GO:0016324|GO:0030154|GO:0042605|GO:0050900|GO:0055085	large neutral amino acids transporter small subunit 1	174.316	73.1353	7.57529	5.79701	160.362	209.344	153.242	82.5349	72.4252	64.4459	7.61329	7.44713	7.66545	5.90764	5.90108	5.58231
ASHGA5P015560	0.000193808	0.00551079	3.51075	up	protein_coding	NM_001102599		CEACAM20	RefSeq	1530	chr19	-	45010210	45033548	NM_001102598	ACCATCAACTGTCCCCAGTCCTCCTCCCTGTCCTCAGGGGCCATCGCTGGTATTGTCATC	125931	Hs.689632	GO:0016021	carcinoembryonic antigen-related cell adhesion molecule 20 isoform 4L precursor	30858.6	10669.1	15.0033	13.1915	29556.9	37872.9	25145.9	10989.6	9351.67	11665.9	14.94	15.1744	14.8956	13.1847	13.009	13.3809
ASHGA5P012856	0.00729826	0.0358367	2.16556	up	protein_coding	ENST00000381178	CCDS7731.1	TH	GENCODE	1910	chr11	-	2185158	2193035		AAGAGGGCAGGGCGCCCCGGGGCCCAGCCTCACAGGCTCTCCGTGGCCTGGAACTGCAGC	7054	Hs.435609	GO:0055114|GO:0044281|GO:0007605|GO:0007507|GO:0007601|GO:0032355|GO:0001666|GO:0009635|GO:0032496|GO:0034641|GO:0003007|GO:0071363|GO:0010259|GO:0021987|GO:0042755|GO:0009414|GO:0045471|GO:0035176|GO:0007617|GO:0007626|GO:0009416|GO:0051412|GO:0042462|GO:0006631|GO:0009887|GO:0014823|GO:0006665|GO:0048596|GO:0010043|GO:0051602|GO:0007613|GO:0001975|GO:0043434|GO:0071333|GO:0035690|GO:0031667|GO:…	tyrosine hydroxylase [Source:HGNC Symbol;Acc:11782]	29.8209	25.9494	5.29451	4.17977	27.3323	34.1514	27.979	22.7973	21.7727	33.278	5.28918	5.14814	5.44622	3.92335	4.03339	4.58257
ASHGA5P012429	0.00248192	0.0195247	2.22365	up	protein_coding	NM_015864	CCDS47384.1	FAM65B	RefSeq	2452	chr6	-	24839594	24877583		TATTCTAAAAAAGTAGAGAAGATCCTCTAATGGATCCCAGTGTGCCCATCCCTCAACCTC	9750	Hs.559459	GO:0005739|GO:0005856|GO:0007517|GO:0030154|GO:0030175	protein FAM65B isoform 2	191.189	119.87	7.69831	6.54538	191.119	196.822	185.627	123.223	115.83	120.556	7.82262	7.36878	7.90353	6.50199	6.61685	6.51731
ASHGA5P029832	0.00068034	0.00992047	3.07134	up	protein_coding	NM_174891	CCDS42000.1	C14orf79	RefSeq	1908	chr14	+	105452615	105461855		AGTGATGACAGTTTGGAATGGAGACGGACCTGCCCCGACCTTCTCCTGTCCGATGGGAAA	122616	Hs.27183		uncharacterized protein C14orf79	1442.23	552.385	10.4895	8.87062	1548.96	1468.35	1309.36	598.758	539.948	518.448	10.6946	10.1804	10.5934	8.91856	8.95092	8.74237
ASHGA5P029986	0.000146612	0.00494795	2.38053	up	protein_coding	NM_170726	CCDS188.1	ALDH4A1	RefSeq	2386	chr1	-	19197923	19229293	NM_003748	GCTGCTGCCGGCGCCCGCGCTCCGCCGCGCCCTGCTGTCCCGCCCCTGGACCGGGGCCGG	8659	Hs.77448	GO:0003842|GO:0004029|GO:0005759|GO:0006560|GO:0006561|GO:0006562|GO:0009055|GO:0010133|GO:0019470|GO:0034641|GO:0044281	delta-1-pyrroline-5-carboxylate dehydrogenase, mitochondrial isoform a precursor	3444.01	1664.83	11.7132	10.4619	3382.39	3853.58	3096.06	1715.57	1451.11	1827.81	11.7628	11.5788	11.798	10.445	10.3727	10.568
ASHGA5P055420	0.000200188	0.00559875	2.23797	up	protein_coding	ENST00000305748	CCDS8834.1	KRT73	GENCODE	2284	chr12	-	53001353	53012343		TCAGCATCTTATCCCCACTTTCTGGCCTCCCCACCATGAGCCGCCAATTCACCTACAAGT	319101	Hs.55410	GO:0045095|GO:0005198	keratin 73 [Source:HGNC Symbol;Acc:28928]	3288.52	1684.73	11.6419	10.4797	3361.55	3609.35	2894.67	1807.62	1578.97	1667.6	11.7531	11.4724	11.7003	10.5152	10.4881	10.436
ASHGA5P013751	0.00201984	0.0173141	2.39654	up	protein_coding	NM_014231	CCDS41740.1	VAMP1	RefSeq	2748	chr12	-	6571403	6579843		GTTATTGTAATCTACTTTTTTACTTGAGAATGTACCACCCCTTCCCTGTTGTCCATTGCC	6843	Hs.20021	GO:0005515|GO:0005741|GO:0005887|GO:0007268|GO:0007269|GO:0016192|GO:0030054|GO:0030666|GO:0030672|GO:0043005	vesicle-associated membrane protein 1 isoform 1	1957.49	941.498	10.9179	9.65698	2053.44	1948.63	1870.39	989.866	868.508	966.119	11.0818	10.566	11.1061	9.67066	9.65316	9.64712
ASHGA5P026997	0.000154832	0.00505209	2.91196	up	protein_coding	ENST00000360168	CCDS53738.1	SCNN1A	GENCODE	3481	chr12	-	6456008	6484390		CCAGAGCTCAGCCTTGACCCTGACCCTTGCTCTCCCCAATCCACTCCGGGGCTCATGAAG	6337	Hs.591047	GO:0006814|GO:0050896|GO:0007588|GO:0050909|GO:0035725|GO:0016021|GO:0016020|GO:0005624|GO:0009897|GO:0016324|GO:0030864|GO:0034706|GO:0005515|GO:0003779|GO:0015280|GO:0005272|GO:0050699	sodium channel, non-voltage-gated 1 alpha subunit [Source:HGNC Symbol;Acc:10599]	7967.33	3205.7	12.9706	11.4286	7619.97	8875.3	7406.72	3180.28	3473.21	2963.6	12.9402	12.8891	13.0824	11.3558	11.6161	11.3138
ASHGA5P054450	0.00132632	0.0139249	2.39883	up	protein_coding	NM_001040084	CCDS31194.1	ANXA8	RefSeq	2070	chr10	+	48255224	48271368	NM_001630	AGGCAGAGCCCGGGGGCGAGGGGACGGCAGGCAGGTGTGGCGCTGCCCTGGGCGGGCTTG	653145	Hs.535306	GO:0005509|GO:0005544|GO:0007596	annexin A8	116.612	70.4725	6.99332	5.73099	88.8035	174.083	86.9492	84.149	60.009	67.2595	6.8287	7.22156	6.9297	5.93954	5.60377	5.64967
ASHGA5P039378	0.00277015	0.0208581	2.61859	up	protein_coding	NM_015230	CCDS3441.1	ARAP2	RefSeq	7375	chr4	-	36067619	36245979		AACCTGGCTCTGCTTACCTGGTGGTGAAGAGATTCTTAACCGCTGACACAATTAAACACT	116984	Hs.479451	GO:0005547|GO:0005829|GO:0007264|GO:0008060|GO:0008270|GO:0032312|GO:0051056	arf-GAP with Rho-GAP domain, ANK repeat and PH domain-containing protein 2	206.922	111.88	7.80237	6.41358	200.715	226.187	193.864	137.806	82.1969	115.636	7.88695	7.55616	7.96401	6.6846	6.09968	6.45646
ASHGA5P005161	0.0019707	0.0170795	2.1653	up	protein_coding	ENST00000377244	CCDS8089.1	SNX15	GENCODE	1939	chr11	+	64794879	64808044	NR_037650	TCCAAGGAAGAAGGCGCAGCCCCCAGCCCCACCCATGTGGCTGAGCTGGCAACGATGGAG	29907	Hs.80132	GO:0007154|GO:0006886|GO:0005737|GO:0005829|GO:0005730|GO:0016020|GO:0030659|GO:0005515|GO:0008565|GO:0035091	sorting nexin 15 [Source:HGNC Symbol;Acc:14978]	435.926	252.985	8.7992	7.68464	468.964	459.15	379.665	261.141	245.05	252.765	9.02057	8.51616	8.86088	7.6513	7.76888	7.63372
ASHGA5P054986	0.000106116	0.00422315	2.51752	up	protein_coding	NM_013246	CCDS31617.1	CLCF1	RefSeq	1860	chr11	-	67131638	67141206		CACTCCGCCAGCCTCCGGGAGAGGAGCCGCACCCGGCCGGCCCGGCCCCAGCCCCATGGA	23529	Hs.502977	GO:0002639|GO:0005102|GO:0005125|GO:0005125|GO:0005127|GO:0005127|GO:0005515|GO:0005576|GO:0005576|GO:0007166|GO:0007259|GO:0008083|GO:0008284|GO:0019221|GO:0030183|GO:0030890|GO:0042517|GO:0042517|GO:0043066|GO:0043524|GO:0046982|GO:0048295|GO:0048711|GO:0097058|GO:0097059	cardiotrophin-like cytokine factor 1 isoform 1 precursor	339.383	173.978	8.44927	7.11726	345.553	401.573	271.024	186.278	160.073	175.583	8.61526	8.33216	8.40039	7.1455	7.11975	7.08654
ASHGA5P000998	0.00265526	0.0203172	2.56353	up	protein_coding	NM_021158	CCDS12997.1	TRIB3	RefSeq	2469	chr20	+	361307	378203		ACGGGGCGAGATGCGAGCCACCCCTCTGGCTGCTCCTGCGGGTTCCCTGTCCAGGAAGAA	57761	Hs.516826	GO:0003714|GO:0004860|GO:0005515|GO:0005524|GO:0005634|GO:0005634|GO:0005730|GO:0005829|GO:0005886|GO:0006351|GO:0006355|GO:0006468|GO:0006469|GO:0006915|GO:0006950|GO:0007173|GO:0008286|GO:0008543|GO:0010827|GO:0016301|GO:0019901|GO:0019901|GO:0031625|GO:0032092|GO:0032869|GO:0043405|GO:0044255|GO:0044281|GO:0045599|GO:0045717|GO:0048011|GO:0048015|GO:0051443|GO:0055106	tribbles homolog 3	928.295	428.755	9.83861	8.48048	974.634	939.774	870.476	471.382	432.436	382.446	10.0301	9.49151	9.99421	8.56189	8.61148	8.26807
ASHGA5P047788	0.00321761	0.0226122	2.11284	up	protein_coding	NM_152911	CCDS7683.1	PAOX	RefSeq	1878	chr10	+	135192740	135205198		AGTACTGGGGGCGACCTGGACCTGCTGGCTCAGCCCCTCCCTGCAGACGGCGCCGGCGCC	196743	Hs.532469	GO:0005102|GO:0005782|GO:0006595|GO:0006596|GO:0006598|GO:0006805|GO:0009446|GO:0009447|GO:0034641|GO:0044281|GO:0046203|GO:0046208|GO:0046592|GO:0046592|GO:0052899|GO:0052901|GO:0052902|GO:0052903|GO:0052904|GO:1901307	peroxisomal N(1)-acetyl-spermine/spermidine oxidase isoform 1	6012.96	3257.7	12.5393	11.4601	6541.94	5915.52	5581.4	3246.05	3433.27	3093.78	12.7206	12.2287	12.6686	11.3941	11.5995	11.3867
ASHGA5P012221	0.0385583	0.105568	2.17472	up	protein_coding	NM_001077497	CCDS43441.1	PRR3	RefSeq	3341	chr6	+	30524485	30532473		AGACTGGAGATGAGGAGGATGGGAGTCCCATCGCTCTTCACAGAGGTCCTCCAGGATCAA	80742	Hs.118354	GO:0003676|GO:0008270	proline-rich protein 3 isoform b	29.321	26.2121	5.2483	4.12748	29.5652	36.3117	22.0861	23.5348	16.4432	38.6582	5.3869	5.2281	5.12992	3.97198	3.59369	4.81675
ASHGA5P016089	0.00186177	0.016516	3.4876	up	protein_coding	NM_001127227	CCDS7886.1	CD59	RefSeq	7573	chr11	-	33724555	33744498		TATACTTCTTACAGTGAGGAGCCAGAGCTTCCAGGTTCTGTGGACAATCACAATGGGAAT	966	Hs.278573	GO:0005515|GO:0005576|GO:0005886|GO:0007166|GO:0007596|GO:0009986|GO:0016020|GO:0031362	CD59 glycoprotein preproprotein	235.734	91.2519	7.90967	6.10743	152.159	342.949	212.093	99.5994	67.497	106.659	7.54426	8.1119	8.07283	6.18897	5.78954	6.34377
ASHGA5P052926	0.02141	0.071235	2.13968	up	protein_coding	NM_000702	CCDS1196.1	ATP1A2	RefSeq	5496	chr1	+	160085519	160113374		TCCCCTACAGCCTCCTCATCTTCATCTATGATGAGGTCCGAAAGCTCATCCTGCGGCGGT	477	Hs.34114	GO:0001504|GO:0002026|GO:0002087|GO:0005391|GO:0005524|GO:0005737|GO:0005768|GO:0005886|GO:0005886|GO:0005890|GO:0005901|GO:0006754|GO:0006813|GO:0006814|GO:0006940|GO:0006942|GO:0008217|GO:0008344|GO:0008542|GO:0015991|GO:0019229|GO:0019829|GO:0034220|GO:0040011|GO:0042383|GO:0043197|GO:0045202|GO:0045822|GO:0045988|GO:0046872|GO:0051481|GO:0055085	sodium/potassium-transporting ATPase subunit alpha-2 proprotein	607.518	341.564	9.23312	8.13572	689.253	540.924	592.375	381.713	355.175	287.802	9.54114	8.72021	9.438	8.24195	8.32747	7.83775
ASHGA5P018999	0.0066576	0.0338679	2.74175	up	protein_coding	NM_001130964	CCDS46793.1	PLCD1	RefSeq	2976	chr3	-	38048986	38066278	NR_024071	TTAAGGTGGCGGCGCTCAATGGACGGAGGCTGGGCCTACAGGATGATGAGGATCTACAGG	5333	Hs.80776	GO:0001525|GO:0004435|GO:0004871|GO:0005509|GO:0005543|GO:0005737|GO:0005829|GO:0006644|GO:0016042|GO:0032794|GO:0035556|GO:0042127|GO:0060716	1-phosphatidylinositol 4,5-bisphosphate phosphodiesterase delta-1 isoform 1	23.2706	15.5626	4.84047	3.38537	17.4688	38.2013	14.1417	19.9825	12.808	13.8974	4.70143	5.28928	4.53068	3.71035	3.20953	3.23622
ASHGA5P021538	0.000316735	0.00687343	3.89454	up	protein_coding	NM_001195005	CCDS53698.1	C11orf70	RefSeq	548	chr11	+	101918168	101946842		GATTCTTCTGGACAATGGATCATATTAGGTTTTGCTAGTGGAAGACTCAGAAAAATATGA	85016	Hs.98328		uncharacterized protein C11orf70 isoform 2	16.2339	6.16176	4.42944	2.46798	11.6219	23.3962	13.6835	8.25936	5	5.22591	4.14502	4.6523	4.49099	2.6164	2.34646	2.44108
ASHGA5P027305	0.0424227	0.112403	3.69093	up	protein_coding	NM_002272	CCDS41787.1	KRT4	RefSeq	2147	chr12	-	53200326	53207900		ACTGGTGGCTTTGGTGGTGGATTTGGGGGCTCCTTCAGTGGTAAGGGTGGCCCTGGCTTC	3851	Hs.654610	GO:0005198|GO:0005882|GO:0007010|GO:0030855|GO:0045095|GO:0050680	keratin, type II cytoskeletal 4	2217.85	555.91	10.7089	8.82495	1151.09	4646.28	856.177	623.486	357.564	686.681	10.2789	11.8767	9.97123	8.98128	8.33715	9.15643
ASHGA5P046715	3.25456e-05	0.00269605	4.81976	up	protein_coding	ENST00000544824	CCDS53524.1	MTRNR2L7	GENCODE	1494	chr10	-	37890365	37891859	ENST00000545075	GGATGCTATCTCAATCTAAAAAATCATCACCACCCTACCCAAGAACAGGGTTTGTTAAGA	100288485	Hs.727092	GO:0005737|GO:0005576	MT-RNR2-like 7 [Source:HGNC Symbol;Acc:37164]	55332.9	14617.1	15.9206	13.6517	54015.2	60865.8	51117.7	15036.3	16526.5	12288.7	15.8674	15.8977	15.9968	13.6717	13.8188	13.4645
ASHGA5P007463	0.0233219	0.075278	2.02284	up	protein_coding	NM_001029852	CCDS34190.1	PDE8B	RefSeq	4240	chr5	+	76506705	76724080		CTCCCATCACAAAGGACGGCTTGAGAAGACTGTCAGGAAACGAGTATGTGTTTACTAAGA	8622	Hs.584830	GO:0000156|GO:0004114|GO:0005575|GO:0005829|GO:0006198|GO:0006355|GO:0009187|GO:0046676|GO:0046872	high affinity cAMP-specific and IBMX-insensitive 3',5'-cyclic phosphodiesterase 8B isoform 5	22.1422	21.697	4.90107	3.88469	18.8702	24.9682	22.5882	29.2042	19.9063	15.9804	4.79914	4.74409	5.15999	4.31753	3.89469	3.44185
ASHGA5P004716	0.0015918	0.0152006	2.18713	up	protein_coding	NM_001161581	CCDS54591.1	POC1A	RefSeq	2284	chr3	-	52109248	52188706	NM_015426	GGGGAATCTGCCAGAAGTGGACTTCCCTGTCCCCCCAGGCAGAGGCAGGAGTGTGGAGTC	25886	Hs.476306	GO:0005737|GO:0005813|GO:0005814|GO:0005932	POC1 centriolar protein homolog A isoform 3	780.595	421.749	9.5883	8.45926	794.124	825.225	722.435	416.58	391.565	457.104	9.73184	9.31097	9.72209	8.36864	8.46005	8.54908
ASHGA5P037768	0.000264476	0.00633629	2.19896	up	protein_coding	NM_002751	CCDS14090.1	MAPK11	RefSeq	2420	chr22	-	50702141	50708779		ATATATCCAGTCCCTGCCCCCCATGCCCCAGAAGGACCTGAGCAGCATCTTCCGTGGAGC	5600	Hs.57732	GO:0000187|GO:0002224|GO:0002755|GO:0002756|GO:0004674|GO:0004707|GO:0005515|GO:0005524|GO:0005654|GO:0005829|GO:0006351|GO:0006950|GO:0007165|GO:0007243|GO:0007265|GO:0008063|GO:0010467|GO:0016070|GO:0016071|GO:0034130|GO:0034134|GO:0034138|GO:0034142|GO:0035666|GO:0042692|GO:0045087|GO:0048011|GO:0051090|GO:0051149|GO:0051403	mitogen-activated protein kinase 11	32739.2	18104.1	15.0992	13.9624	32108.6	39514.3	26594.5	18335.9	17058	18918.3	15.0717	15.2364	14.9894	13.9525	13.8652	14.0694
ASHGA5P001179	0.00269837	0.0205261	37.7589	up	protein_coding	ENST00000222286	CCDS12465.1	GAPDHS	GENCODE	1492	chr19	+	36024313	36036221		TGACAATTTCGTGAAGCTCATTTCATGGTACGACAACGAATATGGCTACAGTCACCGGGT	26330	Hs.248017	GO:0055114|GO:0044281|GO:0007286|GO:0005975|GO:0006096|GO:0006006|GO:0006094|GO:0030317|GO:0045821|GO:0005829|GO:0009434|GO:0005737|GO:0019861|GO:0005515|GO:0050661|GO:0051287|GO:0016620|GO:0004365	glyceraldehyde-3-phosphate dehydrogenase, spermatogenic [Source:HGNC Symbol;Acc:24864]	2417.57	85.956	10.9686	5.72983	1348.37	4678.46	1225.89	63.523	34.2941	160.051	10.5079	11.8849	10.513	5.5032	4.74325	6.94306
ASHGA5P052907	7.54417e-05	0.00371223	3.75502	up	protein_coding	NM_003564	CCDS1189.1	TAGLN2	RefSeq	1360	chr1	-	159887902	159895284		AGATCCTCTGATCCCACCCCAGGCCTTGCCCCTGCCCTCCCACGAATGGTTAATATATAT	8407	Hs.517168	GO:0005515|GO:0005886|GO:0007517|GO:0031965	transgelin-2	46076.6	15331.1	15.636	13.7272	46386.7	52639.2	39203.8	15550.2	13382.8	17060.1	15.6191	15.6794	15.6096	13.7242	13.5343	13.9231
ASHGA5P033389	0.0153637	0.0570266	3.06238	up	protein_coding	NM_001113495	CCDS45794.1	SEPT9	RefSeq	3651	chr17	+	75471324	75496678		TAGTTTATAGGACCTGAAGTGCCCCCATGGGCTCAAGTTTCTGGGAAGGCCTGCAGGTGG	10801	Hs.440932	GO:0001725|GO:0003924|GO:0005515|GO:0005525|GO:0005737|GO:0005874|GO:0006184|GO:0007049|GO:0015629|GO:0048471|GO:0051291|GO:0051301	septin-9 isoform d	76.6292	43.6446	6.52334	4.90869	78.1982	79.7543	71.9351	53.6328	23.7079	53.5932	6.66452	6.23257	6.67293	5.248	4.16896	5.30911
ASHGA5P041376	0.047836	0.122133	2.17729	up	protein_coding	NM_003202	CCDS4169.1	TCF7	RefSeq	3277	chr5	+	133450401	133483920		CGCCGCCGGTCCCGAGCGCGACCTGGCCGAGCTCAAGTCGTCGCTCGTGAACGAGTCCGA	6932	Hs.573153	GO:0003682|GO:0003700|GO:0005515|GO:0005634|GO:0005667|GO:0006351|GO:0006355|GO:0006357|GO:0006955|GO:0007420|GO:0008013|GO:0016055|GO:0021915|GO:0022008|GO:0030538|GO:0033153|GO:0042127|GO:0042981|GO:0043565|GO:0044212|GO:0046632|GO:0048557|GO:0048619|GO:0048699|GO:0060070|GO:0071353	transcription factor 7 isoform 1	16.2424	14.178	4.38533	3.2628	22.3334	18.19	8.20392	13.5306	16.9438	12.0595	5.01912	4.32483	3.81205	3.11333	3.64029	3.03478
ASHGA5P028738	0.00137802	0.0142211	2.22808	up	protein_coding	NM_016529	CCDS41873.1	ATP8A2	RefSeq	5006	chr13	+	25946208	26595420		AGATGCTGAACGGCGCAGGCCTGGACAAAGCTCTTAAGATGTCCCTGCCGCGGAGGTCGA	51761	Hs.444957	GO:0000287|GO:0004012|GO:0005524|GO:0006812|GO:0008285|GO:0015662|GO:0016021	probable phospholipid-transporting ATPase IB	31.1193	25.4208	5.3213	4.1655	24.1708	41.2906	27.8965	25.0034	21.995	29.2641	5.12504	5.39602	5.44285	4.07097	4.04599	4.37954
ASHGA5P043969	0.001356	0.0140748	4.40832	up	protein_coding	NM_178829	CCDS5876.2	C7orf34	RefSeq	774	chr7	+	142636602	142637957		AATGCCCCTGGAAAGGGTTAAGGGCCAGGACAGGAATGGGGCAGGAGGTGCACGGATCCT	135927	Hs.239676	GO:0005576	uncharacterized protein C7orf34	19.5553	6.83778	4.67659	2.53636	13.0723	27.5174	18.0761	5	10.5133	5	4.30459	4.86925	4.85592	2.34074	2.92556	2.34278
ASHGA5P021683	0.0028653	0.0212444	2.22262	up	protein_coding	ENST00000537971	CCDS8520.1	TSPAN9	GENCODE	4284	chr12	+	3186520	3395730		TGCGGGCGCGAATTTAAGAAGTGCAACATGGCCAGGGGCTGCCTCTGCTGCTTGAAGTAC	10867	Hs.504517	GO:0016021|GO:0005624|GO:0005887	tetraspanin 9 [Source:HGNC Symbol;Acc:21640]	97.687	68.5691	6.8339	5.68164	90.3862	109.028	93.6471	66.7578	56.9731	81.9765	6.84826	6.62579	7.02765	5.57904	5.51982	5.94605
ASHGA5P000928	0.000969718	0.011821	2.27025	up	protein_coding	NM_006116	CCDS13993.1	TAB1	RefSeq	3240	chr22	+	39795758	39827887		CCCTCACCAACCAAAGCCCGACCTTAACCCTGCAGTCCACCAACACGCACACGCAGAGCA	10454	Hs.507681	GO:0000185|GO:0000187|GO:0002224|GO:0002755|GO:0002756|GO:0003824|GO:0005515|GO:0005829|GO:0007249|GO:0007254|GO:0008047|GO:0008063|GO:0010008|GO:0034130|GO:0034134|GO:0034138|GO:0034142|GO:0035666|GO:0035872|GO:0045087|GO:0051092|GO:0051403|GO:0070423	TGF-beta-activated kinase 1 and MAP3K7-binding protein 1 isoform alpha	672.208	351.013	9.36285	8.17999	668.656	833.796	514.173	397.563	346.701	308.775	9.5015	9.32418	9.26286	8.29991	8.292	7.94807
ASHGA5P039766	7.07467e-06	0.00185761	4.83234	up	protein_coding	NM_024494	CCDS847.1	WNT2B	RefSeq	2515	chr1	+	113051369	113063910		TGCCTGCCTTCTGCTCCTGCTGCTGCTGACGCTGCCGGCCCGCGTAGACACGTCCTGGTG	7482	Hs.258575	GO:0002062|GO:0002088|GO:0005110|GO:0005578|GO:0005615|GO:0005615|GO:0005886|GO:0007223|GO:0008584|GO:0009950|GO:0016055|GO:0021871|GO:0030182|GO:0060070|GO:0060492|GO:0060638|GO:0061072|GO:0061303|GO:0071425|GO:0090190|GO:0090263	protein Wnt-2b isoform WNT-2B2	73545	19776.7	16.3682	14.0955	73848.8	85700.9	61085.3	20613.9	18935.3	19780.7	16.3707	16.4707	16.2633	14.1262	14.0066	14.1538
ASHGA5P043091	0.00067656	0.00987202	4.68614	up	protein_coding	NM_015852	CCDS43593.1	ZNF117	RefSeq	6404	chr7	-	64434829	64451414		AGAAACAGTACAAATGTGATGAATGTGGCAAAGCTTCTACCTGATCCTCAAAACTCATTG	51351	Hs.250693	GO:0003677|GO:0003700|GO:0005634|GO:0006351|GO:0006355|GO:0008270	zinc finger protein 117	4869.86	1199.18	12.197	9.96858	3939.88	6796.08	3873.62	1540.17	1111.29	946.078	12.0064	12.453	12.1316	10.292	9.98702	9.6267
ASHGA5P008988	2.26049e-05	0.00251764	5.99966	up	protein_coding	NM_138297	CCDS3311.1	MUC4	RefSeq	3958	chr3	-	195473637	195538844		TGTGTCTCTGCCTCCTTCCGCATGTGGTCCCAGGAGTTTCCCTCTTCCCCTATGGGGCAG	4585	Hs.369646	GO:0005176|GO:0005201|GO:0005578|GO:0005796|GO:0005887|GO:0007160|GO:0008150|GO:0016020|GO:0016266|GO:0030197|GO:0043687|GO:0044267	mucin-4 isoform e precursor	11248.5	2180.33	13.4339	10.849	11324.4	13345.7	9075.46	2427.85	2199.92	1913.24	13.4792	13.4699	13.3526	10.9653	10.9459	10.6358
ASHGA5P054945	0.000351246	0.00720741	2.56332	up	protein_coding	NM_001178030	CCDS53661.1	SF1	RefSeq	2946	chr11	-	64532075	64545938		ACGCCGTTGGGTAAGCTGGGCCCCCCCGGGCTGCCCCCGCTCCCCGGGCCCAAAGGAGGC	7536	Hs.502829	GO:0000245|GO:0000389|GO:0000398|GO:0003676|GO:0003714|GO:0003723|GO:0005634|GO:0005634|GO:0005681|GO:0005730|GO:0005840|GO:0006351|GO:0006355|GO:0008270	splicing factor 1 isoform 6	3420.79	1534.73	11.7068	10.3487	3477.82	3601.13	3183.42	1571	1447.3	1585.88	11.8107	11.4691	11.8404	10.3153	10.369	10.3619
ASHGA5P017940	0.000135886	0.00475529	2.9342	up	protein_coding	NM_052884	CCDS12790.2	SIGLEC11	RefSeq	3183	chr19	-	50452249	50464429		CTGCTACCAGGGAAGCTGGAGCATGGGGGAGGACTTGGCCTGGGGGCTGCCCTGGGAGCT	114132	Hs.661852	GO:0007155|GO:0016021|GO:0030246	sialic acid-binding Ig-like lectin 11 isoform 1 precursor	108.184	56.8835	6.96681	5.41384	104.127	122.005	98.4197	58.4841	51.4879	60.6786	7.04905	6.7668	7.08458	5.37825	5.37066	5.49261
ASHGA5P007050	0.000162639	0.00514883	2.04994	up	protein_coding	NM_001145104	CCDS53951.1	SMAD3	RefSeq	5441	chr15	+	67458492	67487533	NM_001145102, NM_001145103, NM_005902	AGATCCCACCAGGATGCAACCTGAAGATCTTCAACAACCAGGAGTTCGCTGCCCTCCTGG	4088	Hs.730690	GO:0000122|GO:0000122|GO:0000122|GO:0000987|GO:0000988|GO:0001102|GO:0001657|GO:0001666|GO:0001701|GO:0001707|GO:0001756|GO:0001836|GO:0001889|GO:0001933|GO:0001947|GO:0002076|GO:0002520|GO:0003690|GO:0003700|GO:0003700|GO:0005160|GO:0005515|GO:0005518|GO:0005634|GO:0005637|GO:0005654|GO:0005667|GO:0005737|GO:0005829|GO:0005886|GO:0006351|GO:0006367|GO:0006810|GO:0006917|GO:0006919|GO:0006955|GO:…	mothers against decapentaplegic homolog 3 isoform 4	705.225	403.082	9.42992	8.39433	696.866	881.717	537.091	439.658	366.357	403.23	9.55822	9.40967	9.32186	8.45443	8.37229	8.35628
ASHGA5P012812	7.74583e-05	0.00375308	11.9891	up	protein_coding	NM_144675	CCDS10631.1	GSG1L	RefSeq	4538	chr16	-	27798849	27899478	NM_001109763	ACTTCCGGGAGAGGATGGAGAAGAGGGACGGGAGCGAGGAGGACTTTCACTTAGACTGCC	146395	Hs.91910	GO:0016021	germ cell-specific gene 1-like protein isoform 2	58.119	6.52597	6.08216	2.4985	49.5896	87.2952	37.4722	5	9.57792	5	6.06623	6.34744	5.83281	2.34074	2.81199	2.34278
ASHGA5P034659	0.00147957	0.0146097	6.33024	up	protein_coding	NM_001144824	CCDS46101.1	ZNF234	RefSeq	4482	chr19	+	44645709	44664462	NM_006630	TAGAAAAGGAAAAAAAGCTTGATATAATGAAGACAGCAACTCAAAGAAAAGGGAAATCAG	10780	Hs.235992	GO:0003677|GO:0005634|GO:0006351|GO:0006355|GO:0008270	zinc finger protein 234	40.7307	11.5709	5.63866	2.9764	36.8605	58.2839	27.0478	16.0512	5	13.6617	5.67813	5.83625	5.4016	3.37043	2.34646	3.2123
ASHGA5P047409	0.000256826	0.00625138	3.01452	up	protein_coding	NM_003055	CCDS7231.1	SLC18A3	RefSeq	2440	chr10	+	50818346	50820766		TGTGTAGAGCCTGCATCTGTCTGTCCTTCCTTCCATTGCTCCCAGTGCCAAACTTGGGCC	6572	Hs.654374	GO:0005277|GO:0005886|GO:0005887|GO:0007268|GO:0007269|GO:0008021|GO:0015870|GO:0016020|GO:0030121|GO:0030122|GO:0042166|GO:0043679|GO:0060201	vesicular acetylcholine transporter	2617.5	989.627	11.3161	9.72413	2464.34	2946.46	2441.7	1101.4	993.033	874.449	11.3165	11.1831	11.4485	9.81916	9.83929	9.51394
ASHGA5P035712	0.0054091	0.0298647	3.40672	up	protein_coding	NM_001165931	CCDS54334.1	RRM2	RefSeq	3452	chr2	+	10262694	10271546		GGAAGGGCCGGGGCACCAAAGCCAATGGGAAGGGCCGGGAGCGCGCGGCGCGGGAGATTT	6241	Hs.226390	GO:0000082|GO:0000083|GO:0000278|GO:0004748|GO:0004748|GO:0005515|GO:0005654|GO:0005737|GO:0005829|GO:0005971|GO:0006260|GO:0006260|GO:0009186|GO:0009263|GO:0015949|GO:0044281|GO:0046914|GO:0051290|GO:0055086	ribonucleoside-diphosphate reductase subunit M2 isoform 1	23.7673	12.6929	4.86815	3.09977	13.5157	38.3354	19.4509	14.0292	14.0227	10.0268	4.35015	5.29362	4.96068	3.16758	3.34929	2.78242
ASHGA5P053367	0.00353194	0.0236447	2.45939	up	protein_coding	NM_023942	CCDS5901.1	LRRC61	RefSeq	1809	chr7	+	150020295	150035245	NM_001142928	GGAGCAGGTACTCAGCTCTGCGGGCCCCACCTCTTCCTTCGTCTTCTGAACGTGGCCTAT	65999	Hs.647119		leucine-rich repeat-containing protein 61	896.764	429.388	9.79025	8.49195	948.947	861.583	879.76	451.316	404.073	432.775	9.99023	9.36946	10.0111	8.49841	8.51046	8.46698
ASHGA5P029613	5.9199e-05	0.0032635	4.56466	up	protein_coding	NM_002028	CCDS9769.1	FNTB	RefSeq	2836	chr14	+	65453506	65529370		ACACACTGTCTGCTGCTCTCCTGATCATGGCTTCTCCGAGTTCTTTCACCTACTATTGCC	2342	Hs.325531	GO:0004311|GO:0004660|GO:0005515|GO:0005875|GO:0008144|GO:0008270|GO:0008285|GO:0010035|GO:0014070|GO:0018343|GO:0019840|GO:0034097|GO:0042060|GO:0042277|GO:0045787|GO:0048146	protein farnesyltransferase subunit beta	2788.58	688.706	11.3787	9.18814	2404.01	3766.05	2195.69	810.45	576.763	678.904	11.2867	11.5348	11.3145	9.37107	9.05077	9.14259
ASHGA5P049483	0.000152426	0.005002	3.71093	up	protein_coding	NM_002616	CCDS11131.1	PER1	RefSeq	4717	chr17	-	8043787	8055753		CTGAGGGGGCTGCTGTTGCAGGAGGCCCTGGGAGCAGTGCCGGGCCCCCACCTCCCAGTG	5187	Hs.445534	GO:0000122|GO:0000978|GO:0000988|GO:0004871|GO:0005634|GO:0005737|GO:0006351|GO:0007623|GO:0009416|GO:0009649|GO:0032922|GO:0045892|GO:0070888	period circadian protein homolog 1	223.209	83.5645	7.90016	6.00838	212.013	244.91	212.704	87.0327	82.9058	80.7549	7.96129	7.66223	8.07697	5.9926	6.11138	5.92117
ASHGA5P009992	0.00178671	0.016061	2.50132	up	protein_coding	NM_001102608	CCDS46911.1	COL6A6	RefSeq	8475	chr3	+	130279177	130395888		GGCAGGCATGGAAAACCGGAATGCCCAGTGCACCCAACCGAGTTGGTGTTTGCCCTGGAC	131873	Hs.591282	GO:0005581|GO:0007155|GO:0031012	collagen alpha-6(VI) chain precursor	13.0953	10.7637	4.20701	2.88432	11.6782	13.9309	13.6767	12.7125	10.536	9.04256	4.15182	3.97856	4.49067	3.02532	2.9292	2.69844
ASHGA5P006758	0.0271169	0.0834038	3.32075	up	protein_coding	ENST00000392496	CCDS45785.1	SPHK1	GENCODE	1866	chr17	+	74381288	74383941	ENST00000323374, NM_001142601	ATGGATCCAGCGGGCGGCCCCCGGGGCGTGCTCCCGCGGCCCTGCCGCGTGCTGGTGCTG	8877	Hs.68061	GO:0007205|GO:0043066|GO:0006954|GO:0044281|GO:0007420|GO:0035556|GO:0006457|GO:0007165|GO:0019722|GO:0048146|GO:0044267|GO:0045766|GO:0031398|GO:0030335|GO:0042346|GO:0006916|GO:0051092|GO:0045987|GO:0006665|GO:0001568|GO:0045931|GO:0030307|GO:0051084|GO:0010803|GO:0030148|GO:0032651|GO:0006670|GO:0046521|GO:0005634|GO:0005737|GO:0005886|GO:0005829|GO:0005624|GO:0003677|GO:0005515|GO:0005524|GO:…	sphingosine kinase 1 [Source:HGNC Symbol;Acc:11240]	24.7762	13.421	4.92134	3.18983	14.0399	19.8505	40.4382	13.816	14.0447	12.4024	4.40155	4.43846	5.92402	3.14505	3.35103	3.07342
ASHGA5P034782	0.00187081	0.0165893	3.87042	up	protein_coding	NM_032430	CCDS12921.1	BRSK1	RefSeq	3109	chr19	+	55795533	55823903		GGGCCGGGACCAAGGGCACCATGTCGTCCGGGGCCAAGGAGGGAGGTGGGGGCTCTCCCG	84446	Hs.182081	GO:0000287|GO:0004674|GO:0005524|GO:0005634|GO:0005730|GO:0005737|GO:0005813|GO:0005886|GO:0006468|GO:0006974|GO:0007269|GO:0007409|GO:0008021|GO:0009411|GO:0010212|GO:0019901|GO:0030010|GO:0030054|GO:0030182|GO:0031572|GO:0043015|GO:0050321|GO:0051298	serine/threonine-protein kinase BRSK1	88.5481	36.1301	6.6782	4.72571	63.439	95.5196	106.686	34.1664	34.8638	39.3602	6.39029	6.45995	7.18436	4.56347	4.76926	4.8444
ASHGA5P018320	0.000147274	0.00495731	5.03828	up	protein_coding	NM_014741	CCDS7921.1	ATG13	RefSeq	5812	chr11	+	46638825	46697568	NM_001205121, NM_001205122	TGTACCACCTCTTTTTCCACCTCCCCACCATCCCAGCTGATGGTTCCTGGGAAGGAAGGT	9776	Hs.127403	GO:0000045|GO:0000407|GO:0005515|GO:0005829|GO:0019901|GO:0070969	autophagy-related protein 13 isoform 2	12944.3	2997.83	13.6615	11.3286	12973.1	12847.3	13012.5	3220.82	3070.11	2702.55	13.6799	13.4084	13.8963	11.3784	11.4473	11.1601
ASHGA5P010865	0.0190034	0.0658431	2.85596	up	protein_coding	NM_001184872	CCDS53419.1	FCRLA	RefSeq	1937	chr1	+	161676761	161684142		ATGCTACTGGAACTGTTTCCAGCGCCAATTCTCAGAGCTGTACCCTCAGCTGAACCCCAA	84824	Hs.266331	GO:0005576|GO:0005737|GO:0030154	Fc receptor-like A isoform 5 precursor	23.1064	15.1952	4.85341	3.33944	12.3791	33.5337	23.4064	20.1932	14.6221	10.7702	4.23422	5.1228	5.20321	3.72773	3.41442	2.87616
ASHGA5P002546	0.000414438	0.00779637	2.63786	up	protein_coding	NM_016216	CCDS33863.1	DBR1	RefSeq	2690	chr3	-	137879829	137893791		TATCGAAAAGGTCATTTTGAGTGCCCCCCTTATAATTCATCTACAATCAGGAGTATATAT	51163	Hs.477700	GO:0000375|GO:0000398|GO:0005634|GO:0008419|GO:0046872	lariat debranching enzyme	2055.17	895.736	10.9636	9.5642	1968.98	2632.04	1564.48	972.283	698.72	1016.2	11.0287	11.0164	10.8456	9.63905	9.33828	9.71527
ASHGA5P016963	0.000607095	0.00944222	2.46199	up	protein_coding	NM_032848	CCDS9166.1	C12orf52	RefSeq	1775	chr12	+	113623554	113630119		ACAAATACAGACCCATCAGCCACACCCCGTCTTACTGTGATGAGTCGCTGTTTGGCTCCC	84934	Hs.524762	GO:0000122|GO:0005515|GO:0005634|GO:0005737|GO:0005813|GO:0007219|GO:0015631|GO:0022008|GO:0045746|GO:0051168	RBPJ-interacting and tubulin-associated protein	733.447	352.052	9.49249	8.19267	758.703	801.286	640.352	344.672	321.08	390.403	9.6627	9.26824	9.54654	8.09238	8.17867	8.30696
ASHGA5P009034	0.00043183	0.00794199	3.64974	up	protein_coding	ENST00000350274	CCDS8622.1	KLRD1	GENCODE	3165	chr12	+	10460416	10469850		CTCATGGCAGCTTTTACTAAACTGAGTATTGAGCCAGCATTTACTCCAGGACCCAACATA	3824	Hs.562457	GO:0050776|GO:0007166|GO:0016021|GO:0005886|GO:0030246|GO:0004888	killer cell lectin-like receptor subfamily D, member 1 [Source:HGNC Symbol;Acc:6378]	149.919	60.8896	7.38286	5.51507	155.854	170.221	123.682	67.5541	63.6271	51.4877	7.57244	7.19088	7.38527	5.59674	5.69777	5.25071
ASHGA5P048613	0.0188889	0.065604	2.24021	up	protein_coding	NM_005159	CCDS10041.1	ACTC1	RefSeq	3693	chr15	-	35080296	35087927		ATTGCTGATCGTATGCAGAAGGAAATCACTGCTCTGGCTCCTAGCACCATGAAGATTAAG	70	Hs.118127	GO:0005524|GO:0005737|GO:0005829|GO:0005884|GO:0006200|GO:0006915|GO:0016887|GO:0017022|GO:0017022|GO:0030017|GO:0030048|GO:0030049|GO:0030240|GO:0031032|GO:0031674|GO:0033275|GO:0042493|GO:0042643|GO:0045471|GO:0055003|GO:0055008|GO:0060047|GO:0060048	actin, alpha cardiac muscle 1 proprotein	2441.45	1227.79	11.1584	9.9948	1650.43	3692.76	1981.17	1247.12	839.112	1597.12	10.7852	11.5121	11.178	10.0017	9.60799	10.3747
ASHGA5P036346	0.000424682	0.00787757	5.18238	up	protein_coding	NM_001207069		BZW1	RefSeq	3086	chr2	+	201676907	201688569		GCTCCCTCTGGGCCGTGCCCGGCCTGGCTAACAAAGCCGCCGCGGCCTCTGTTGTGTGAT	9689	Hs.355983	GO:0005737|GO:0006351|GO:0006355	basic leucine zipper and W2 domain-containing protein 1 isoform 3	2983.48	650.891	11.49	9.11636	3635.63	3015.07	2299.73	710.635	649.993	592.045	11.8825	11.2152	11.3722	9.17271	9.23718	8.9392
ASHGA5P052524	0.00252203	0.0197182	2.35113	up	protein_coding	NM_013237	CCDS4415.1	PRELID1	RefSeq	1287	chr5	+	176730834	176733950		TTTATCATTAAAAATCAACTTCCAGCCCTGTCTGCTGTCTACGTGGTGGGTTGTGGGGAT	27166	Hs.731613	GO:0005634|GO:0005730|GO:0005739|GO:0005739|GO:0006955|GO:0007275	PRELI domain-containing protein 1, mitochondrial precursor	14523.1	7232.35	13.8415	12.6082	14164.4	16595.1	12809.8	6736.16	5977.17	8983.73	13.8261	13.8285	13.8699	12.4701	12.3848	12.9696
ASHGA5P034421	0.000139862	0.00482814	3.4697	up	protein_coding	NM_144614	CCDS42483.1	MBD3L2	RefSeq	774	chr19	+	7049350	7051746	NM_001136507, NM_001164419, NM_001164425	CTCTGAATTGTCACACTTTTCCCTTCCCCACCAGTTCTTTAATAAAAGTATTTGAAAGGC	125997	Hs.567667		methyl-CpG-binding domain protein 3-like 2	10782.7	3561.55	13.385	11.5902	10816.6	10961.5	10570.1	3556.76	3726.11	3401.79	13.4042	13.1811	13.5697	11.5365	11.702	11.532
ASHGA5P032790	0.000118352	0.00446175	3.06728	up	protein_coding	NM_005426	CCDS1538.1	TP53BP2	RefSeq	4802	chr1	-	223967594	224033674	NM_001031685	ATTTGTTCCAGCAAAAACAGAGGGAGCTCGTCCTGGCTGTGTCAAAAGTAGAAGAACTGA	7159	Hs.523968	GO:0005070|GO:0005515|GO:0005634|GO:0005737|GO:0005737|GO:0006915|GO:0006917|GO:0007049|GO:0007165|GO:0017124|GO:0045786|GO:0048471|GO:0051059	apoptosis-stimulating of p53 protein 2 isoform 2	69.308	36.4062	6.3563	4.73934	54.6284	91.4299	61.8656	36.1166	36.9926	36.1093	6.18797	6.4062	6.47473	4.64222	4.86444	4.71137
ASHGA5P008366	0.00325892	0.0227407	3.5557	up	protein_coding	NM_022161	CCDS13512.1	BIRC7	RefSeq	1268	chr20	+	61867275	61871854		CAGGAGCCAGGAGCCAGGGATGTGGAGGCGCAGCTGCGGCGGCTGCAGGAGGAGAGGACG	79444	Hs.256126	GO:0004842|GO:0004869|GO:0005515|GO:0005634|GO:0005737|GO:0005794|GO:0006309|GO:0007257|GO:0008270|GO:0016567|GO:0019899|GO:0042127|GO:0070247	baculoviral IAP repeat-containing protein 7 isoform beta	67.5963	31.777	6.29246	4.46232	48.8891	98.7076	55.1923	44.9886	23.9976	26.3449	6.05041	6.50078	6.32617	4.98133	4.18919	4.21645
ASHGA5P054464	0.000493363	0.00856352	5.94265	up	protein_coding	NM_138932	CCDS7242.1	A1CF	RefSeq	9293	chr10	-	52559168	52645435	NM_001198819	ATGTACCTGTAGGGGCTGCGGGAGTGAGAGGACTGGGCGGCCGTGGCTATTTGGCATACA	29974	Hs.282795	GO:0000166|GO:0003723|GO:0003725|GO:0003727|GO:0003729|GO:0004131|GO:0005515|GO:0005654|GO:0005720|GO:0005737|GO:0005783|GO:0006397|GO:0010467|GO:0016554|GO:0016556|GO:0030895|GO:0050821	APOBEC1 complementation factor isoform 2	138.448	32.7606	7.13906	4.56795	92.5964	237.178	85.5707	36.4466	30.9138	30.9215	6.88386	7.6236	6.90972	4.65624	4.58152	4.4661
ASHGA5P021978	0.0140543	0.054167	2.44807	up	protein_coding	NM_001190726	CCDS53753.1	RERG	RefSeq	2268	chr12	-	15260715	15374411		GGCAAGTCAGAATCAACCTACCGACACCAAGCAACCATCGATGATGAAGTTGTTTCCATG	85004	Hs.199487	GO:0003924|GO:0005525|GO:0005634|GO:0005737|GO:0005829|GO:0007264|GO:0008285|GO:0009725|GO:0016020|GO:0019003|GO:0030308|GO:0030331	ras-related and estrogen-regulated growth inhibitor isoform 2	19.9816	16.0107	4.69311	3.40146	15.5669	29.7267	14.6514	17.2712	10.1957	20.5652	4.53909	4.96803	4.5722	3.47453	2.88833	3.84153
ASHGA5P008334	0.000848474	0.0110856	2.07103	up	protein_coding	NM_139156	CCDS804.1	AMPD2	RefSeq	3785	chr1	+	110162434	110174677		ATGGCCTCAGAGGCTCGGGGTGGTCTGGGGGCCCCTCCGCTGCAGTCTGCCCGATCCCTG	271	Hs.82927	GO:0003876|GO:0005575|GO:0005829|GO:0006144|GO:0006163|GO:0032264|GO:0043101|GO:0044281|GO:0046872|GO:0055086	AMP deaminase 2 isoform 2	111.622	81.088	7.00795	5.9576	105.835	124.303	104.727	83.4435	73.4637	86.3568	7.07446	6.78917	7.16021	5.92543	5.92402	6.02334
ASHGA5P009579	0.000347328	0.00718949	2.94507	up	protein_coding	NM_207194	CCDS1085.1	ADAM15	RefSeq	2927	chr1	+	155023747	155035252	NM_001261465	GAGACTCCAGTCTCAGGGGCCAGCCAAGCCCCCACCCCCAAGGAAGCCACTGCCTGCCGA	8751	Hs.312098	GO:0001525|GO:0001669|GO:0004222|GO:0005515|GO:0005912|GO:0006508|GO:0007160|GO:0008237|GO:0008270|GO:0012505|GO:0016021|GO:0017124|GO:0019861|GO:0030574|GO:0042246|GO:0060317	disintegrin and metalloproteinase domain-containing protein 15 isoform 3 preproprotein	3614.93	1413.9	11.7915	10.2332	3748.68	3749.67	3346.45	1406.12	1351.09	1484.5	11.9291	11.5266	11.9186	10.1581	10.2687	10.2726
ASHGA5P002434	0.000185791	0.00540005	2.99308	up	protein_coding	NM_030576	CCDS11641.1	LIMD2	RefSeq	3232	chr17	-	61773248	61777519		GCGCTCCAAGTCCTTCAGCCTGCGGGCCCAGGTGAAGGAGACCTGCGCCGCCTGCCAGAA	80774	Hs.591166	GO:0008270	LIM domain-containing protein 2	56.148	31.7441	6.10137	4.51974	60.0177	64.326	44.1002	33.6089	27.9863	33.6372	6.31172	5.96213	6.03027	4.53766	4.42154	4.60002
ASHGA5P052636	2.46342e-05	0.00255615	2.09055	up	protein_coding	NM_172016	CCDS34378.1	TRIM39	RefSeq	3578	chr6	+	30295007	30311506	NM_021253	TTTCACCTCAGGTCGACACTACTGGGAGGTGGAGGTGGGCGACAAGACCCACTGGGCAGT	56658	Hs.413493	GO:0003674|GO:0005515|GO:0005575|GO:0005739|GO:0005829|GO:0006915|GO:0008150|GO:0008270|GO:0016874|GO:0042802	tripartite motif-containing protein 39 isoform 2	37.567	31.3468	5.57019	4.50631	33.9383	49.0965	29.6662	31.221	30.396	32.4235	5.56954	5.61177	5.52927	4.42302	4.55276	4.54314
ASHGA5P001119	0.00413045	0.0256713	5.75548	up	protein_coding	ENST00000221403	CCDS12741.1	DHDH	GENCODE	1081	chr19	+	49436938	49448226		TGTCGTGGGAAGGCGTCATGAAACAGGTGTGGATGACACTGTCACGGTGCTCCTGCAGTA	27294	Hs.631555	GO:0005975|GO:0042843|GO:0005625|GO:0000166|GO:0016491|GO:0009055|GO:0047115|GO:0008746|GO:0047837	dihydrodiol dehydrogenase (dimeric) [Source:HGNC Symbol;Acc:17887]	30.3833	9.29336	5.2807	2.75576	22.003	28.7025	40.4443	8.43625	5	14.4438	4.99685	4.92087	5.92438	2.62616	2.34646	3.29466
ASHGA5P051823	0.000694239	0.0100217	3.73488	up	protein_coding	NM_001167931	CCDS54696.1	IL1RAP	RefSeq	2930	chr3	+	190231839	190374986		TATCCTATAATTACTGTGTGTGGTGGGTGGTGGCTACTATCTCTACCAACCCTCTGTATG	3556	Hs.478673	GO:0004871|GO:0004908|GO:0005576|GO:0005622|GO:0005886|GO:0005887|GO:0006461|GO:0006954|GO:0006955|GO:0042094|GO:0045087	interleukin-1 receptor accessory protein isoform 3 precursor	489.537	159.495	8.88815	6.98709	349.402	732.682	386.526	163.461	172.207	142.817	8.63286	9.14936	8.88224	6.94589	7.23782	6.77757
ASHGA5P052458	0.00129756	0.0138129	2.39316	up	protein_coding	NM_024028	CCDS4296.1	PCYOX1L	RefSeq	2561	chr5	+	148737569	148749221		GCTAGCGCCTGAATCCGGCGTGCTGCCCGCTCGCCGCCCGCCATGGCCCGCGCAGCCCCG	78991	Hs.644397	GO:0005576|GO:0016670|GO:0030328	prenylcysteine oxidase-like precursor	866.569	427.868	9.74059	8.48167	879.196	905.845	814.664	441.952	373.787	467.866	9.87673	9.44762	9.89742	8.46236	8.39778	8.58487
ASHGA5P050236	0.0154364	0.0571756	2.2932	up	protein_coding	NM_000041	CCDS12647.1	APOE	RefSeq	1223	chr19	+	45409038	45412650		CAGCCGGACCCGCGACCGCCTGGACGAGGTGAAGGAGCAGGTGGCGGAGGTGCGCGCCAA	348	Hs.654439	GO:0000302|GO:0001540|GO:0001937|GO:0005319|GO:0005515|GO:0005543|GO:0005576|GO:0005615|GO:0005737|GO:0005737|GO:0005886|GO:0006629|GO:0006641|GO:0006641|GO:0006898|GO:0006917|GO:0007010|GO:0007186|GO:0007263|GO:0007271|GO:0008201|GO:0008203|GO:0008203|GO:0008219|GO:0008289|GO:0010544|GO:0010873|GO:0010875|GO:0010875|GO:0016209|GO:0019934|GO:0030195|GO:0030425|GO:0030516|GO:0030828|GO:0032488|GO:…	apolipoprotein E precursor	12.2596	10.7204	4.10796	2.91059	11.782	14.391	10.6056	8.50367	7.14942	16.5082	4.16519	4.01696	4.14171	2.63153	2.6062	3.49404
ASHGA5P049611	0.0365495	0.101972	2.64131	up	protein_coding	NM_032932	CCDS11267.1	RAB11FIP4	RefSeq	8665	chr17	+	29718641	29865232		TTCGAGGTGTGCGGCCGCGACCCCGACGGCTTCCTGCGCGTGGAGCGCGTCGCGGCGCTC	84440	Hs.406788	GO:0000910|GO:0005509|GO:0005515|GO:0005768|GO:0006810|GO:0017137|GO:0019048|GO:0030139|GO:0030306|GO:0030496|GO:0032154|GO:0042803|GO:0055038	rab11 family-interacting protein 4	12.7968	7.94065	4.04797	2.64671	5.81977	16.9326	15.6379	5	10.9273	7.8947	3.25548	4.23231	4.65612	2.34074	2.97436	2.62504
ASHGA5P013087	0.000233913	0.0060197	2.43034	up	protein_coding	NM_032732	CCDS2591.2	IL17RC	RefSeq	2407	chr3	+	9958757	9975305	NM_001203265, NR_037807	CAGCTGCCTGCCCTGCCCTGGCTCAACGTGTCAGCAGATGGTGACAACGTGCATCTGGTT	84818	Hs.129959	GO:0005886|GO:0016021|GO:0030368|GO:1900017	interleukin-17 receptor C isoform 3 precursor	29349.1	14715.5	14.9488	13.6676	30573.7	29921.1	27552.5	14030	15721.4	14395	14.9855	14.7947	15.0662	13.5509	13.7676	13.6844
ASHGA5P048350	5.90998e-05	0.0032635	4.36392	up	protein_coding	NM_023930	CCDS8255.2	KCTD14	RefSeq	1688	chr11	-	77726760	77734320		GTGGGCAGGATGACGAGCCAGACCCCTCTGCCCCAGTCCCCCCGGCCCAGGCGGCCAACG	65987	Hs.709780	GO:0051260	BTB/POZ domain-containing protein KCTD14	6527.83	1751.31	12.6627	10.5371	6793.06	6689.36	6101.07	1842.63	1661.24	1750.08	12.7725	12.4268	12.7887	10.5521	10.5618	10.4972
ASHGA5P021780	1.26616e-05	0.00216313	2.41504	up	protein_coding	ENST00000540734	CCDS54078.1	RPAIN	GENCODE	2478	chr17	+	5322960	5332985	NR_027685	AGGAAATTCAACAGGAGCTGATCAACCAAGTCTTCTGAGTTGACAGAGCAGAAGCTTCGT	84268	Hs.462086	GO:0005634|GO:0005730	RPA interacting protein [Source:HGNC Symbol;Acc:28641]	1375.89	659.933	10.4052	9.13315	1297.65	1719.68	1110.34	665.991	596.965	716.842	10.462	10.3829	10.3707	9.07892	9.11102	9.20951
ASHGA5P034457	0.000891412	0.0113895	2.6545	up	protein_coding	NM_001111307	CCDS45961.1	PDE4A	RefSeq	4794	chr19	+	10531332	10580307		CGGCCCGGCCTGCGCACGACCCGCATGTCCTGGCCCTCGTCCTTCCATGGCACTGGCACC	5141	Hs.89901	GO:0004115|GO:0005515|GO:0005634|GO:0005829|GO:0006198|GO:0006198|GO:0007165|GO:0016020|GO:0032587|GO:0042493|GO:0046872|GO:0048471	cAMP-specific 3',5'-cyclic phosphodiesterase 4A isoform 1	742.69	333.497	9.51628	8.10784	768.854	780.883	678.335	365.573	323.189	311.729	9.68302	9.23655	9.62928	8.17526	8.18717	7.96109
ASHGA5P003418	0.000383247	0.00753748	7.10814	up	protein_coding	NM_000781	CCDS32291.1	CYP11A1	RefSeq	1936	chr15	-	74630102	74660081		CGATTTACAGGGAGAAGCTCGGCAACGTGGAGTCGGTTTATGTCATCGACCCTGAAGATG	1583	Hs.303980	GO:0001101|GO:0005506|GO:0005739|GO:0005759|GO:0006700|GO:0006700|GO:0006701|GO:0006703|GO:0006805|GO:0007617|GO:0008202|GO:0008203|GO:0008203|GO:0008386|GO:0008386|GO:0009055|GO:0009651|GO:0010332|GO:0014037|GO:0015485|GO:0017085|GO:0018879|GO:0018894|GO:0018958|GO:0018963|GO:0020037|GO:0021549|GO:0021766|GO:0030061|GO:0033197|GO:0033327|GO:0033591|GO:0033595|GO:0042359|GO:0042493|GO:0042542|GO:…	cholesterol side-chain cleavage enzyme, mitochondrial isoform a precursor	11873.5	2000.74	13.5292	10.6998	11545.2	12313.6	11761.8	1916.5	2498.84	1586.88	13.504	13.3341	13.7496	10.6059	11.13	10.3634
ASHGA5P013654	0.0180814	0.0637318	2.00861	up	protein_coding	NM_001014987	CCDS32425.1	LAT	RefSeq	1680	chr16	+	28996386	29002104	ENST00000395461, NM_001014988	GCGAGCTACGAGAACGAGGAACCAGCCTGTGAGGATGCGGATGAGGATGAGGACGACTAT	27040	Hs.632179	GO:0001772|GO:0005070|GO:0005515|GO:0005886|GO:0006955|GO:0007229|GO:0007265|GO:0007596|GO:0008180|GO:0016021|GO:0019722|GO:0019901|GO:0030168|GO:0035556|GO:0042110|GO:0043303|GO:0045121|GO:0050852|GO:0050863	linker for activation of T-cells family member 1 isoform b	10.5463	9.78588	3.8454	2.8392	8.0146	16.0238	7.60046	5.9889	9.92153	13.4472	3.65915	4.16112	3.71592	2.47566	2.85154	3.19041
ASHGA5P034323	0.000146767	0.00494795	7.03327	up	protein_coding	NM_001172675	CCDS54314.1	ZNF347	RefSeq	4245	chr19	-	53641956	53662322	NM_001172674, NM_032584	AGCCAAGTACAAATAGCAGGAAACCCAGATGGATGGGAATGGATCAAAGCTGTGATCACA	84671	Hs.467239	GO:0003677|GO:0005634|GO:0006351|GO:0006355|GO:0008270	zinc finger protein 347 isoform a	32.5359	6.72404	5.32839	2.51419	22.465	49.2576	25.8851	9.65306	5.51906	5	5.02768	5.61595	5.34153	2.7038	2.49599	2.34278
ASHGA5P055339	0.000854697	0.0111198	4.16963	up	protein_coding	NM_001193451	CCDS53772.1	TMTC1	RefSeq	8750	chr12	-	29653745	29936743		AGGGGAGGATGCCAGACGCCCGGGAGAGGCCAGGGCAGCAGCGGCGGCGGCGGCGCGATG	83857	Hs.401954	GO:0005739|GO:0016021	transmembrane and TPR repeat-containing protein 1 isoform 1	109.856	39.5866	6.90557	4.84565	72.9007	167.112	89.5567	48.8458	36.6724	33.2417	6.57978	7.16858	6.96835	5.10522	4.85021	4.58152
ASHGA5P041751	6.61703e-05	0.00342911	3.32515	up	protein_coding	NM_001105205	CCDS41412.1	RUSC1	RefSeq	2525	chr1	+	155293727	155300909		CTCGCCTCCCTCCGTCTCCTCCCTTTCCCCTGTCTGTCTTTCCATTGGTCCATGCCGCCC	23623	Hs.226499	GO:0000209|GO:0003779|GO:0005070|GO:0005515|GO:0005634|GO:0005737|GO:0005769|GO:0005794|GO:0005874|GO:0005886|GO:0014069|GO:0015630|GO:0016023|GO:0030054|GO:0031410|GO:0045211	RUN and SH3 domain-containing protein 1 isoform c	168477	82312.7	17.8591	16.1257	170085	188993	146352	88435.3	76566.4	81936.5	17.8841	17.9604	17.7327	16.2401	15.9847	16.1522
ASHGA5P011183	2.99062e-05	0.00269605	6.96017	up	protein_coding	ENST00000369849	CCDS7545.1	INA	GENCODE	3231	chr10	+	105036919	105050108		TCAATGTCAAAATGGCTCTTGACATTGAGATAGCAGCTTACAGGAAACTGCTGGAAGGCG	9118	Hs.500916	GO:0030154|GO:0007399|GO:0042246|GO:0060052|GO:0045104|GO:0005882|GO:0005883|GO:0005200	internexin neuronal intermediate filament protein, alpha [Source:HGNC Symbol;Acc:6057]	3020.94	499.336	11.5001	8.70103	2660.34	3917.39	2485.11	539.347	393.462	565.2	11.4211	11.6044	11.4749	8.76305	8.46728	8.87275
ASHGA5P051053	0.00648502	0.0333829	2.39391	up	protein_coding	ENST00000370527	CCDS46627.1	C20orf166	GENCODE	1220	chr20	+	61147659	61167971		GATGGCGCCGTGCGGCCCGGCCGCAGGTCCCGCAGCCGTGGAGAGGACCCAGCAGGTGGC	128826	Hs.86507		chromosome 20 open reading frame 166 [Source:HGNC Symbol;Acc:16159]	39.044	28.5534	5.6172	4.35783	27.6044	44.2056	45.322	29.2409	29.4185	27.0009	5.30148	5.48422	6.0659	4.31955	4.49963	4.25431
ASHGA5P054236	0.000842175	0.0110443	2.7045	up	protein_coding	NM_000651	CCDS44308.1	CR1	RefSeq	9979	chr1	+	207669472	207815110	NM_000573	CCTTCCTTGACAAAGTACTATACAGCTGAAGAACATCTCGAATACAATTTTGGTGGGAAA	1378	Hs.334019	GO:0001851|GO:0001855|GO:0001861|GO:0004877|GO:0005886|GO:0005887|GO:0006958|GO:0009986|GO:0030449|GO:0045087|GO:0045957|GO:0045959|GO:1900004|GO:1900005	complement receptor type 1 isoform S precursor	22.0105	15.3634	4.82825	3.39289	16.2118	32.3135	17.5061	15.7667	15.9643	14.3592	4.59688	5.07486	4.81302	3.34408	3.54826	3.28632
ASHGA5P003754	0.0261857	0.0814825	2.10321	up	protein_coding	NM_004577	CCDS5522.1	PSPH	RefSeq	2142	chr7	-	56078743	56119268		CAGATATGGAAGCCTGTCCTCCTGCTGATGCTTTCATTGGATTTGGAGGAAATGTGATCA	5723	Hs.512656	GO:0000287|GO:0004647|GO:0004647|GO:0005509|GO:0005737|GO:0005829|GO:0006563|GO:0006564|GO:0006564|GO:0008652|GO:0009612|GO:0031667|GO:0033574|GO:0034641|GO:0042803|GO:0044281	phosphoserine phosphatase	4699.57	2661.29	12.1782	11.1056	4761.14	4781.1	4556.47	3073.67	3098.54	1811.65	12.269	11.9128	12.3527	11.3014	11.4633	10.5521
ASHGA5P032816	0.00398523	0.0251154	2.18695	up	protein_coding	NM_001005271	CCDS32553.2	CHD3	RefSeq	7372	chr17	+	7788122	7816075		CGCGGGCCGGGCCACGACCGGGGCCGCGACCGCCACAGCCCCCCCGGCTGCCACCTCTTC	1107	Hs.25601	GO:0003677|GO:0004003|GO:0004386|GO:0005515|GO:0005524|GO:0005634|GO:0005634|GO:0005730|GO:0005737|GO:0005813|GO:0006351|GO:0006355|GO:0006357|GO:0007051|GO:0008270|GO:0016568|GO:0016581|GO:0045111|GO:0051297	chromodomain-helicase-DNA-binding protein 3 isoform 3	409.551	237.708	8.7178	7.58888	446.271	408.227	374.153	239.747	214.694	258.682	8.9555	8.35442	8.84347	7.52095	7.57703	7.66866
ASHGA5P051457	0.0008471	0.0110758	2.41567	up	protein_coding	NM_004256	CCDS2676.1	SLC22A13	RefSeq	2560	chr3	+	38307297	38319806		ACTTGTGATCCTGCTGGGAGAGTACCACGCTGCCCTCCCCATGCTCATCTACGGCAGCCT	9390	Hs.225941	GO:0005887|GO:0015101|GO:0015695	solute carrier family 22 member 13	6414.33	3067.71	12.6345	11.3621	6903.62	6487.82	5851.55	3154.43	2747.76	3300.92	12.7975	12.3806	12.7253	11.3431	11.2707	11.4724
ASHGA5P036092	0.00825514	0.038625	2.18685	up	protein_coding	NM_001105556	CCDS41290.1	THEMIS2	RefSeq	2723	chr1	+	28199054	28213193		AAAGGACTGTGAGGGCGAGAGGGAGGAGAATCCCGAGTTCACGTCCCTGGCTGTGGGTGA	9473	Hs.10649	GO:0006954|GO:0007155	protein THEMIS2 isoform 3	22.5059	20.2101	4.92488	3.79602	24.5635	22.1605	20.7938	25.284	16.247	19.0995	5.14562	4.57794	5.05107	4.08696	3.57575	3.72535
ASHGA5P007762	0.000812156	0.0108175	2.80349	up	protein_coding	NM_001039670	CCDS41741.1	IFFO1	RefSeq	2733	chr12	-	6648693	6665249	NM_001193457, NM_080730	ACAAGCGGAGGTGGGAAGAGGAGTACACGGTGCGGATCCAGCTGCAAGACCGTGTAAATG	25900	Hs.15243	GO:0005882	intermediate filament family orphan 1 isoform 4	10.9562	5.68993	3.89867	2.41145	9.24185	16.2835	7.34318	7.06979	5	5	3.84109	4.18127	3.67365	2.54509	2.34646	2.34278
ASHGA5P021455	0.000508077	0.00867948	2.23877	up	protein_coding	NM_001256795		LOC100129083	RefSeq	729	chr19	+	51919159	51920679		GTCCACATGGCAGCTTCCTCTCTCCACCCGAAAGAAGTACTGTGACTCATCCTGCATCTG	100129083	Hs.724300		uncharacterized protein LOC100129083	1260.12	660.5	10.3016	9.13889	1182.04	1446.55	1151.77	708.928	662.622	609.951	10.3206	10.1564	10.4278	9.169	9.26212	8.98556
ASHGA5P050464	0.00652354	0.033496	3.24015	up	protein_coding	NM_001145051		TMEM247	RefSeq	681	chr2	+	46706703	46711564		TGGTTTTCTGGATGGCAGCAGAGGACAGGGAGATGATGGAAGCCCGGGGTGCGGGAGAAA	388946	Hs.733348	GO:0005783|GO:0016021	transmembrane protein 247	21.3306	12.2027	4.7426	3.04654	13.3177	33.6501	17.024	16.6045	7.41933	12.5844	4.32828	5.127	4.77253	3.41878	2.62532	3.09553
ASHGA5P048584	5.8551e-05	0.00325267	3.3096	up	protein_coding	NM_005517	CCDS283.1	HMGN2	RefSeq	1989	chr1	+	26798901	26803133		TAATAAAGCTGGATACAGTTTGGCTTGGAATGCTGCCTCTGATCTTTTCCCACAAGTGGG	3151	Hs.181163	GO:0000785|GO:0003677|GO:0005634|GO:0005634|GO:0005737|GO:0006325|GO:0006355|GO:0031492	non-histone chromosomal protein HMG-17	100262	44767.6	16.9504	15.2237	97049.9	112313	91422	44545.5	50866	38891.2	16.8904	17.0219	16.9387	15.2045	15.3867	15.0799
ASHGA5P044234	0.00352384	0.0236124	4.99017	up	protein_coding	NM_001142446	CCDS47849.1	ANK1	RefSeq	8486	chr8	-	41510743	41754280		AAGGAGAAGGAGGAATCCAACAGGAAGCGGAGAAACCGCTCCCGTGACCGAAAGAAGAAG	286	Hs.654438	GO:0005198|GO:0005200|GO:0005515|GO:0005829|GO:0005856|GO:0005886|GO:0005886|GO:0006779|GO:0006887|GO:0006888|GO:0007010|GO:0007165|GO:0007411|GO:0008093|GO:0008093|GO:0014731|GO:0015672|GO:0016323|GO:0016529|GO:0019899|GO:0019899|GO:0030507|GO:0030507|GO:0030507|GO:0030863|GO:0031430|GO:0045199|GO:0048821|GO:0051117|GO:0072661	ankyrin-1 isoform 9	20.031	5.81489	4.74693	2.42784	22.9588	14.3842	22.7501	5	5	7.44468	5.05535	4.0161	5.16936	2.34074	2.34646	2.59633
ASHGA5P041041	6.10595e-05	0.00329051	5.31915	up	protein_coding	NM_001145523	CCDS54838.1	RAI14	RefSeq	4942	chr5	+	34687663	34832717		TACTTTGAGCAGAGTTGTGGAGTGGGAGAAATTAATGGAAGGGAATTAGATGGAAGCCAA	26064	Hs.431400	GO:0005739|GO:0005856|GO:0005938	ankycorbin isoform c	19.7493	5	4.75452	2.34333	18.5155	20.9674	19.7649	5	5	5	4.77396	4.50827	4.98133	2.34074	2.34646	2.34278
ASHGA5P039445	0.00618586	0.03243	2.54919	up	protein_coding	NM_002092	CCDS47069.1	GRSF1	RefSeq	6646	chr4	-	71681498	71705627		GCCTGCCTGCCCTTCTACTCCGCCGCTGGCTCTATCCCGTCGGGCGTCTCGGGCCGCCGC	2926	Hs.309763	GO:0000166|GO:0003723|GO:0003729|GO:0005737|GO:0005739|GO:0006378|GO:0009952|GO:0016331	G-rich sequence factor 1 isoform 1	18913.5	8416.07	14.1875	12.8375	17968.6	26593.1	12178.7	8569.49	7193.08	9485.64	14.1832	14.5825	13.7968	12.8119	12.6464	13.0541
ASHGA5P014218	0.0395653	0.107399	2.21755	up	protein_coding	NM_004801	CCDS54360.1	NRXN1	RefSeq	9368	chr2	-	50145642	51259674		ACACGCTATGGTGACAATATCAGTGGATGGGATTCTTACCACAACGGGCTACACGCAAGA	9378	Hs.637685	GO:0001525|GO:0004872|GO:0005102|GO:0005515|GO:0005886|GO:0005886|GO:0005887|GO:0007155|GO:0007157|GO:0007158|GO:0007158|GO:0007411|GO:0007612|GO:0009986|GO:0009986|GO:0016021|GO:0016339|GO:0023041|GO:0030054|GO:0030139|GO:0030534|GO:0035176|GO:0042734|GO:0043473|GO:0044295|GO:0045184|GO:0045202|GO:0046872|GO:0048306|GO:0050839|GO:0050885|GO:0051968|GO:0060134|GO:0060325|GO:0071625|GO:0090004|GO:…	neurexin-1-beta isoform alpha1 precursor	13.7445	12.275	4.26431	3.11534	11.8697	13.7203	15.6435	6.11569	13.7378	16.9715	4.17558	3.96066	4.65669	2.48484	3.32074	3.54045
ASHGA5P051543	0.000462633	0.00826924	2.31449	up	protein_coding	NM_032750	CCDS2842.1	ABHD14B	RefSeq	2447	chr3	-	52002525	52008646		TTTGAACCACAGGCCCTTCACCAGCACAGCAGCAGCAGGCATGGCAGCAAGCGTGGAGCA	84836	Hs.420796	GO:0005634|GO:0005730|GO:0005737|GO:0016787	abhydrolase domain-containing protein 14B isoform 1	175.899	106.018	7.57132	6.36063	148.178	236.362	143.157	113.435	110.439	94.1807	7.51664	7.62029	7.57703	6.37798	6.54389	6.16002
ASHGA5P008469	0.0130519	0.0515729	3.4911	up	protein_coding	NM_004020	CCDS55394.1	DMD	RefSeq	7080	chrX	-	31137344	32173586	NM_004023	TGTCTTAGAGGGGGACAACATGGAAACGAATCTGCAAGCAGAATATGACCGTCTAAAGCA	1756	Hs.495912	GO:0002162|GO:0003779|GO:0005200|GO:0005515|GO:0005829|GO:0005856|GO:0007517|GO:0008270|GO:0008307|GO:0008307|GO:0009986|GO:0016010|GO:0016010|GO:0016010|GO:0030049|GO:0042383|GO:0043034|GO:0043043|GO:0043234|GO:0050998	dystrophin Dp140c isoform	21.175	10.4932	4.70637	2.90269	10.3024	32.495	20.7276	11.1722	13.716	6.59134	3.99037	5.08214	5.04661	2.84921	3.31776	2.54111
ASHGA5P054671	0.0112726	0.0469567	3.68498	up	protein_coding	NM_005706	CCDS7735.1	TSSC4	RefSeq	1443	chr11	+	2423522	2425106		AGAGGCTGAGGAGTGGGGCAGCCACCATGGAGGCCTGCAGGAGGTGGAGGCACTGTCAGG	10078	Hs.523424		protein TSSC4	50.6957	23.6032	5.8496	3.96794	34.5205	85.029	32.5377	27.8166	13.2546	29.7382	5.58956	6.31045	5.64879	4.23578	3.26557	4.40248
ASHGA5P010347	0.0404123	0.108932	2.36407	up	protein_coding	ENST00000360957	CCDS33050.1	PPP1R13L	GENCODE	3120	chr19	-	45882891	45908312		GCCCGGATCCGCGCCCGCTCCGGCCGGCACCATGGACAGCGAGGCATTCCAGAGCGCGCG	10848	Hs.466937	GO:0006351|GO:0006915|GO:0000122|GO:0035264|GO:0060048|GO:0003229|GO:0009791|GO:0003215|GO:0031076|GO:0042633|GO:0048871|GO:0005634|GO:0005737|GO:0005515|GO:0003714|GO:0008134	protein phosphatase 1, regulatory subunit 13 like [Source:HGNC Symbol;Acc:18838]	89.7707	56.8896	6.65808	5.41681	60.8591	75.7126	132.74	57.0173	57.2261	56.4254	6.33261	6.16601	7.47562	5.33933	5.52588	5.38522
ASHGA5P047620	0.00152876	0.0148995	2.40262	up	protein_coding	NM_001009997	CCDS31261.1	C10orf62	RefSeq	1264	chr10	+	99349449	99350691		AAGCAAAGAATGAAAGCTGGATTAAATCCCACTTTAGCCGCCTTTCCGAAGAGAAGCTGG	414157	Hs.662302	GO:0005515	uncharacterized protein C10orf62	95.6126	61.6392	6.80312	5.53851	107.205	102.48	77.1529	65.812	60.2294	58.8761	7.09061	6.54869	6.77006	5.55626	5.60958	5.44969
ASHGA5P002373	0.0447312	0.116603	3.27085	up	protein_coding	NM_001130455	CCDS46331.1	DYSF	RefSeq	6682	chr2	+	71693831	71913893	NM_001130976, NM_001130977, NM_001130978, NM_001130983, NM_001130984, NM_001130986, NM_003494	TGTAGTGGCAGACACAGGAGGAGAGGAAGACACAGAGGACCAGGGACTCACTGGAGATGA	8291	Hs.252180	GO:0001778|GO:0005544|GO:0005886|GO:0006906|GO:0016021|GO:0030315|GO:0030659	dysferlin isoform 2	23.1333	12.8661	4.78897	3.07931	14.1676	40.4808	14.7514	8.06832	5.94891	24.5811	4.41356	5.36974	4.58362	2.60378	2.52786	4.10627
ASHGA5P002600	0.000211746	0.00575408	3.719	up	protein_coding	NM_030941	CCDS10591.1	LOC81691	RefSeq	2791	chr16	+	20817766	20860990	NM_001144924	TTGAGAATCCGCCATGGAGCCAGAGAGGGAAGGGACCGAGAGACACCCCAGGAAGGTCAG	81691	Hs.177926	GO:0000166|GO:0003723|GO:0004527|GO:0005730	putative RNA exonuclease NEF-sp isoform 1	17.8084	8.82989	4.60271	2.7078	14.9702	20.8632	17.5918	9.28834	6.28806	10.9133	4.48776	4.50104	4.81933	2.67885	2.55075	2.89378
ASHGA5P013748	1.40541e-05	0.00221638	11.1295	up	protein_coding	NM_145698	CCDS44368.1	ACBD5	RefSeq	3993	chr10	-	27484142	27529808		TGCTCTTCCTCTCGTTTCATGCAGGCTCTTGGGAAAGCTGGTGCTGCTGCTGCCTGATTC	91452	Hs.530597	GO:0000062|GO:0003674|GO:0005778|GO:0006810|GO:0008150|GO:0008289|GO:0016021|GO:0043231	acyl-CoA-binding domain-containing protein 5 isoform 1	6719.9	706.621	12.7135	9.23716	6382.57	6992.84	6784.29	781.377	653.215	685.271	12.6858	12.507	12.9476	9.31528	9.24363	9.15257
ASHGA5P050095	0.0031026	0.0221204	3.3582	up	protein_coding	NM_001161616	CCDS54221.1	RGL3	RefSeq	2571	chr19	-	11504731	11530018		ATCTCCCCCAGTGTGTCCCCAGGGTCACCCCCCTCAAGTCCTAGAAGCAGAGATGCTCCT	57139	Hs.375142	GO:0005085|GO:0005622|GO:0007264|GO:0051056	ral guanine nucleotide dissociation stimulator-like 3 isoform 1	62769.1	23064.5	16.0842	14.3366	67284.2	82240.1	38782.9	25824.2	20924.5	22444.8	16.2582	16.4211	15.5735	14.4746	14.174	14.3611
ASHGA5P005166	3.85889e-05	0.00286633	3.82389	up	protein_coding	NM_006228	CCDS6066.1	PNOC	RefSeq	1245	chr8	+	28174648	28200868		TGACAGCTCTCAGCACCTGCTTCCTGCTCCTGCACCATGAAAGTCCTGCTTTGTGACCTG	5368	Hs.88218	GO:0001515|GO:0005184|GO:0005576|GO:0007165|GO:0007218|GO:0007268|GO:0007600	prepronociceptin preproprotein	4185.67	1276.18	12.0135	10.0784	4079.42	4521.45	3956.14	1373.28	1169.13	1286.13	12.0473	11.8342	12.1589	10.1231	10.0589	10.0532
ASHGA5P053642	3.25034e-05	0.00269605	8.30303	up	protein_coding	NM_001114395	CCDS47953.1	CNTLN	RefSeq	4887	chr9	+	17135037	17302049		ATATCAAAAAGTATGCTTTTATTCTGTAATAAAGATGTAAATGTTTATGTATGAACTTAT	54875	Hs.435381	GO:0000155|GO:0005739|GO:0005813|GO:0005814|GO:0016020	centlein isoform 2	330.016	53.3785	8.36348	5.30985	260.087	486.721	243.24	62.8076	48.3361	48.9918	8.24129	8.5926	8.25656	5.48653	5.2742	5.16881
ASHGA5P042122	0.0137326	0.053355	2.01873	up	protein_coding	NM_207360		ZC3H12D	RefSeq	4907	chr6	-	149768765	149806148		GGGGCCCCTGGGGCCGCCTCTCCCGGTCCCCGCCTGCAGCCTCACGCCCCGACTGGGCGG	340152	Hs.632618	GO:0003676|GO:0004519|GO:0005634|GO:0005730|GO:0005737|GO:0005737|GO:0008270|GO:0030308|GO:0043231|GO:2000134	probable ribonuclease ZC3H12D	4878.49	2821.52	12.2211	11.2077	4992.82	5203.18	4439.47	2365.33	3544.8	2554.43	12.3354	12.0249	12.3031	10.9186	11.6406	11.0638
ASHGA5P013804	0.0173874	0.0621298	2.08361	up	protein_coding	NM_152653	CCDS2637.1	UBE2E2	RefSeq	1760	chr3	+	23244783	23632296		CCAACTGTAGTGCTGGACCCAAAGGAGACAACATTTATGAATGGAGGTCAACTATATTGG	7325	Hs.475688	GO:0004842|GO:0005524|GO:0032020|GO:0042296|GO:0070534|GO:0070936|GO:0070979	ubiquitin-conjugating enzyme E2 E2	622.681	355.789	9.22172	8.16264	433.223	908.413	526.408	392.893	240.48	433.994	8.91601	9.45154	9.29762	8.27792	7.73884	8.47115
ASHGA5P018509	9.61049e-05	0.00409965	2.61227	up	protein_coding	NM_170604	CCDS46068.1	RASGRP4	RefSeq	3235	chr19	-	38899697	38916945	NM_001146202, NM_001146205	CAGCACCAAGGCCCTCCTGGAGCTCACTGAGCTCCTTGCCTCCCACAACAACTACGCCCG	115727	Hs.130434	GO:0005088|GO:0005634|GO:0005737|GO:0005886|GO:0007169|GO:0007202|GO:0007264|GO:0008277|GO:0008283|GO:0009991|GO:0016020|GO:0016049|GO:0019992|GO:0030099|GO:0030742|GO:0046579|GO:0046872	RAS guanyl-releasing protein 4 isoform a	1020.82	455.683	9.96582	8.58052	1038.65	1202.38	821.443	489.684	429.679	447.685	10.1271	9.85646	9.9139	8.6218	8.60162	8.51813
ASHGA5P050191	0.00089535	0.0114071	2.61812	up	protein_coding	NM_144689	CCDS12498.1	ZNF420	RefSeq	2990	chr19	+	37569381	37620651		ATTCACACAGGTGAGAAACCCTATGAATGTAAGGAATGTGGGAAATCTTTTATTCGTGGT	147923	Hs.444992	GO:0003677|GO:0005634|GO:0006351|GO:0006355|GO:0008270	zinc finger protein 420	7099.41	3118.84	12.7687	11.3801	6315.22	9250.45	5732.57	3658.21	3042.6	2655.7	12.6686	12.9392	12.6982	11.5762	11.4331	11.1312
ASHGA5P031481	2.1478e-05	0.00247083	8.03772	up	protein_coding	NM_145252	CCDS10479.2	ZG16B	RefSeq	846	chr16	+	2880172	2882285		CCCCACGGCCAGCTCCTTCCTGTTCCCCTGGCGGCCCCTCGCTTCTTCCTTCTGGATGGG	124220	Hs.105887	GO:0005576|GO:0030246	zymogen granule protein 16 homolog B precursor	22890.5	3355.84	14.5135	11.5067	22556.1	28866	17249.5	3711.5	2994.56	3361.45	14.5233	14.7149	14.3022	11.5977	11.4086	11.5137
ASHGA5P048877	0.000326371	0.00696237	4.42913	up	protein_coding	ENST00000394510	CCDS45342.1	AKAP13	GENCODE	8081	chr15	+	86220267	86292586	NM_001270546, NM_006738, NM_007200	TATCAGCAGAGGGTGAAGAGATCTTCTGCTGACCCTCTTCCTCTCTGCTGAGGCAGCTGC	11214	Hs.459211	GO:0035023|GO:0035556|GO:0005737|GO:0005622|GO:0005515|GO:0005543|GO:0005089|GO:0046872|GO:0016301	A kinase (PRKA) anchor protein 13 [Source:HGNC Symbol;Acc:371]	398.669	119.494	8.68145	6.53442	440.907	400.707	354.393	128.112	104.638	125.731	8.9411	8.3293	8.77394	6.56397	6.45708	6.58222
ASHGA5P019775	0.00163594	0.0153445	2.29625	up	protein_coding	NM_001172657	CCDS54712.1	ZFYVE28	RefSeq	1833	chr4	-	2331979	2420370		CCATCGTGTGCCCCCTCCTTCCAGCCCATCCCAGAACACGTGCAGGAGCCACCGCCCACG	57732	Hs.292056	GO:0005515|GO:0005829|GO:0007175|GO:0031901|GO:0032266|GO:0042059|GO:0046872	lateral signaling target protein 2 homolog isoform 4	33552.1	17631.4	15.1295	13.9303	31579.6	42542.5	26534.1	17747.8	15628.8	19517.7	15.0413	15.3599	14.9874	13.9011	13.7599	14.1298
ASHGA5P041410	0.000182691	0.00535678	2.07071	up	protein_coding	ENST00000310331	CCDS4226.1	EIF4EBP3	GENCODE	691	chr5	+	139927250	139929163		TTACTTTGCTGCTCCTCCCGCTCGCTATGTCAACGTCCACTAGCTGCCCGATTCCCGGGG	8637		GO:0045947|GO:0016281|GO:0005515|GO:0008190|GO:0030371	eukaryotic translation initiation factor 4E binding protein 3 [Source:HGNC Symbol;Acc:3290]	2306.41	1287.9	11.1465	10.0964	2285.83	2667.11	1966.28	1334	1295	1234.71	11.2264	11.0438	11.1694	10.086	10.2005	10.0027
ASHGA5P014349	0.00413988	0.0256804	2.39529	up	protein_coding	NM_001185024	CCDS54502.1	ZDHHC8	RefSeq	3237	chr22	+	20119363	20135530		CCGTGCAGAGGGGGCGGATTGGCACCTGCACCCGTGGATGGGGGCGGCGTGGCCAGCCTT	29801	Hs.63128	GO:0005739|GO:0007610|GO:0008270|GO:0016021|GO:0016746|GO:0030659	probable palmitoyltransferase ZDHHC8 isoform 1	17.6202	14.8603	4.58531	3.32511	14.5786	20.9141	17.3681	17.2839	15.8915	11.4055	4.4515	4.50382	4.80061	3.47554	3.54083	2.95896
ASHGA5P034784	0.00178101	0.0160435	2.56901	up	protein_coding	NM_001136136	CCDS46192.1	RPL28	RefSeq	594	chr19	+	55897299	55898408		TTTGTCTGGTTTGGGCCAGAGAGCGGCCCCTTTCCCGGGTCTGGGAGCTGTGATTTTTTA	6158	Hs.652114	GO:0000184|GO:0003723|GO:0003735|GO:0005515|GO:0005737|GO:0005829|GO:0006412|GO:0006412|GO:0006413|GO:0006414|GO:0006415|GO:0006614|GO:0010467|GO:0016032|GO:0016070|GO:0016071|GO:0019058|GO:0019083|GO:0022625|GO:0044267	60S ribosomal protein L28 isoform 4	87.4331	54.2559	6.69799	5.33678	89.6078	88.5551	84.1363	62.4668	50.3343	49.9665	6.83777	6.36806	6.88814	5.47627	5.33566	5.1984
ASHGA5P044590	3.52236e-05	0.00277804	3.04218	up	protein_coding	ENST00000398774	CCDS47936.1	PLEC	GENCODE	14646	chr8	-	144989320	145018905		CTGGCCCGCTCCGTCTGCCCCGTGGGCTCCTGCCACCGTCCCCGATGAAGATCGTGCCCG	5339	Hs.434248	GO:0006915|GO:0006921|GO:0034329|GO:0031581|GO:0046417|GO:0005737|GO:0005886|GO:0005829|GO:0005856|GO:0042383|GO:0043292|GO:0045111|GO:0005925|GO:0005626|GO:0030056|GO:0043034|GO:0016528|GO:0005515|GO:0003779|GO:0008307|GO:0030506	plectin [Source:HGNC Symbol;Acc:9069]	4033.92	1529.48	11.9526	10.3475	4081.28	4425.05	3595.44	1591.01	1444.71	1552.71	12.0482	11.7964	12.0133	10.3391	10.3661	10.3374
ASHGA5P051155	0.000133268	0.00472892	3.25786	up	protein_coding	NM_198693	CCDS42955.1	KRTAP10-2	RefSeq	1071	chr21	-	45970317	45971388		GAGAGCTGCTGTGAGCTCCCCTGCGGCACCCCCAGCTGCTGTGCCCCAGCCCCCTGCCTG	386679	Hs.664660	GO:0045095	keratin-associated protein 10-2	3887.66	1386.71	11.9039	10.1999	3947.14	4061.38	3654.47	1462.27	1282.98	1414.88	12.0088	11.6691	12.0337	10.2156	10.1866	10.1975
ASHGA5P018741	0.00101509	0.0120661	2.41022	up	protein_coding	NM_001193417	CCDS55404.1	DDX3X	RefSeq	5351	chrX	+	41192650	41209524		ATAATCAGAGTGGAGGAAGTACAGCCAGCAGTTTCTACGATAAAGACAGTTCAGGGTGGA	1654	Hs.731543	GO:0003677|GO:0003723|GO:0004003|GO:0004004|GO:0005515|GO:0005524|GO:0005634|GO:0005737|GO:0005741|GO:0005852|GO:0006200|GO:0006351|GO:0007059|GO:0007243|GO:0008134|GO:0008143|GO:0008190|GO:0008625|GO:0009615|GO:0010494|GO:0010501|GO:0016607|GO:0016887|GO:0017148|GO:0019048|GO:0022627|GO:0030307|GO:0030308|GO:0031333|GO:0031369|GO:0032728|GO:0034063|GO:0035613|GO:0042256|GO:0043024|GO:0043065|GO:…	ATP-dependent RNA helicase DDX3X isoform 3	130.014	79.7545	7.20769	5.93852	125.429	143.022	121.592	77.597	82.5337	79.1327	7.29417	6.97059	7.3583	5.81531	6.10557	5.89469
ASHGA5P008635	0.00920461	0.0414585	2.05902	up	protein_coding	ENST00000345080	CCDS34504.1	LIN28B	GENCODE	5505	chr6	+	105404922	105531207		ATGGCCGAAGGCGGGGCTAGCAAAGGTGGTGGAGAAGAGCCCGGGAAGCTGCCGGAGCCG	389421	Hs.23616	GO:0006355|GO:0031054|GO:0010587|GO:0031123|GO:0005634|GO:0005737|GO:0005739|GO:0003723|GO:0003677|GO:0008270|GO:0005515|GO:0003676	lin-28 homolog B (C. elegans) [Source:HGNC Symbol;Acc:32207]	18.5873	17.6816	4.63974	3.59778	13.2537	22.705	19.8031	17.5297	15.2549	20.2602	4.32052	4.61406	4.98463	3.49877	3.47878	3.81578
ASHGA5P039192	0.000417088	0.00779637	7.06638	up	protein_coding	NM_001145143	CCDS46966.1	HTR3D	RefSeq	1609	chr3	+	183749529	183757157		AGAGGCTGGTTCCATGGGAAAGGATTCCTCCTTGGCTTCATCCTCCACCTGCTGCTGCAA	200909	Hs.448004	GO:0005230|GO:0005886|GO:0016021|GO:0034220|GO:0055085	5-hydroxytryptamine receptor 3D isoform 1 precursor	4039.7	656.422	11.9463	9.12536	4446.12	3637.49	4035.47	741.299	660.434	567.532	12.17	11.4855	12.1836	9.23718	9.2592	8.87971
ASHGA5P006282	0.000460819	0.00826415	2.1881	up	protein_coding	NM_002093	CCDS2996.1	GSK3B	RefSeq	7134	chr3	-	119540801	119813264		CTCAAATTAAGGCACATCCTTGGACTAAGGATTCGTCAGGAACAGGACATTTCACCTCAG	2932	Hs.445733	GO:0000320|GO:0001085|GO:0001837|GO:0001954|GO:0002039|GO:0004674|GO:0004674|GO:0005178|GO:0005515|GO:0005524|GO:0005634|GO:0005730|GO:0005737|GO:0005813|GO:0005829|GO:0005886|GO:0005977|GO:0006349|GO:0006468|GO:0006611|GO:0006983|GO:0007173|GO:0007411|GO:0007520|GO:0008013|GO:0008543|GO:0009887|GO:0010226|GO:0010800|GO:0016301|GO:0016301|GO:0016477|GO:0018105|GO:0019901|GO:0021766|GO:0030010|GO:…	glycogen synthase kinase-3 beta isoform 1	718.518	388.142	9.45464	8.32496	664.783	902.881	587.892	463.923	328.769	371.733	9.49069	9.44277	9.43045	8.53641	8.21574	8.22273
ASHGA5P048537	0.000156531	0.00505827	3.31469	up	protein_coding	NM_001803	CCDS30647.1	CD52	RefSeq	523	chr1	+	26644410	26647014		TCTTCTGCTTCAGTTGAGGTGACACGTCTCAGCCTTAGCCCTGTGCCCCCTGAAACAGCT	1043	Hs.276770	GO:0005887|GO:0007204|GO:0016020|GO:0031225|GO:0045730	CAMPATH-1 antigen precursor	1292.78	463.76	10.3335	8.60461	1341.36	1454.39	1082.6	498.939	463.367	428.973	10.5021	10.1667	10.3317	8.64507	8.71571	8.45306
ASHGA5P051154	0.000106026	0.00422315	4.34501	up	protein_coding	NM_030891	CCDS13711.1	LRRC3	RefSeq	2520	chr21	+	45875392	45878739		TCAGGTCAGGATGGGCACCGTGCGCCCACCTCGCCCCTCGCTCCTGCTGGTCTCCACCCG	81543	Hs.326579	GO:0005515|GO:0016021	leucine-rich repeat-containing protein 3 precursor	2340.14	618.029	11.1633	9.04393	2481.58	2484.95	2053.88	639.968	625.52	588.599	11.3275	10.934	11.2284	9.02486	9.17713	8.9298
ASHGA5P050517	0.000513723	0.00873451	3.66181	up	protein_coding	ENST00000244204	CCDS33220.2	NAGK	GENCODE	1801	chr2	+	71295407	71305998		GCGGGAGGTCACGGGAAGTGGGGCGGTGCCCAGACAGCTGGAGGGAAGGAGGTGTCAGGC	55577	Hs.7036	GO:0006044|GO:0006051|GO:0005625|GO:0005515|GO:0005524|GO:0009384|GO:0045127	N-acetylglucosamine kinase [Source:HGNC Symbol;Acc:17174]	19.9087	10.4591	4.73457	2.86201	16.6252	26.0929	17.0082	9.87881	7.86113	13.6373	4.62958	4.80298	4.77114	2.72226	2.65392	3.20984
ASHGA5P012561	0.00546545	0.0300836	3.33612	up	protein_coding	NM_024424	CCDS44562.1	WT1	RefSeq	3028	chr11	-	32409321	32457081	NM_000378, NM_001198551	ACTCATACAGGTGAAAAGCCCTTCAGCTGTCGGTGGCCAAGTTGTCAGAAAAAGTTTGCC	7490	Hs.591980	GO:0000122|GO:0001077|GO:0001570|GO:0001657|GO:0001658|GO:0001822|GO:0003156|GO:0003690|GO:0003700|GO:0003700|GO:0003723|GO:0005515|GO:0005634|GO:0005654|GO:0005730|GO:0005737|GO:0006355|GO:0006355|GO:0006357|GO:0006917|GO:0007281|GO:0007356|GO:0007507|GO:0007530|GO:0008270|GO:0008285|GO:0008380|GO:0008406|GO:0008584|GO:0009888|GO:0016607|GO:0017148|GO:0030308|GO:0030325|GO:0030539|GO:0030855|GO:…	Wilms tumor protein isoform B	46.577	25.3942	5.87454	4.13637	50.7642	47.8246	41.1422	29.2598	29.4758	17.4469	6.09345	5.58536	5.94481	4.32025	4.50299	3.58586
ASHGA5P011547	0.000518844	0.00878132	3.52845	up	protein_coding	NM_033100	CCDS7372.1	CDHR1	RefSeq	5440	chr10	+	85954411	85977121		AAGATTGACATCACAGATGCTGAGACCCTCTCCCGGAGCCCCATGGCTGCCTTCCTGATA	92211	Hs.137556	GO:0005509|GO:0005887|GO:0007156|GO:0042622|GO:0045494	cadherin-related family member 1 isoform 1 precursor	2202.94	719.39	11.0839	9.26484	2278.16	2188.86	2141.79	754.695	707.683	695.793	11.2231	10.7456	11.283	9.26629	9.35648	9.17174
ASHGA5P052299	0.00607223	0.0320834	2.53793	up	protein_coding	NM_032367	CCDS4036.1	ZBED3	RefSeq	1437	chr5	-	76372531	76383030		TCATCACAAAGGTCCTCCTGTAGGGGTGTGGCCACTTCCCCACCCCAGGACAGCGCTTCT	84327	Hs.584988	GO:0001933|GO:0003677|GO:0005829|GO:0046872|GO:0050821|GO:0090263	zinc finger BED domain-containing protein 3	640.212	313.597	9.31165	7.96799	611.381	730.838	578.416	274.039	239.273	427.478	9.37698	9.1449	9.41305	7.72568	7.7323	8.44599
ASHGA5P013901	0.00706563	0.0350799	2.19066	up	protein_coding	NM_001142273		CLASP1	RefSeq	7941	chr2	-	122095351	122407052		CAGCAGCTTTGCCTCCAGGGTCATACGCATCCTTAGATGGTACTACCACTAAAGCGGAGG	23332	Hs.469840	GO:0000086|GO:0000087|GO:0000226|GO:0000236|GO:0000278|GO:0000776|GO:0000777|GO:0001578|GO:0005515|GO:0005794|GO:0005813|GO:0005828|GO:0005829|GO:0005876|GO:0005881|GO:0005938|GO:0007020|GO:0007026|GO:0007026|GO:0007163|GO:0007411|GO:0008017|GO:0008017|GO:0010458|GO:0030981|GO:0031023|GO:0031111|GO:0031592|GO:0034453|GO:0043515|GO:0051010|GO:0051294|GO:0051301	CLIP-associating protein 1 isoform 2	216.507	134.168	7.85145	6.72009	255.299	210.993	183.229	146.678	125.358	130.467	8.21346	7.45753	7.88336	6.77894	6.73966	6.64167
ASHGA5P006895	0.00101702	0.0120688	2.24883	up	protein_coding	NM_145714	CCDS32423.1	ATXN2L	RefSeq	3851	chr16	+	28834368	28848558		AGGAGGAGCCGATGACAGGATTCCTCCCCTTCCACCCCCCGGGGAACTGAAGATTGTCCT	11273	Hs.460499	GO:0003674|GO:0008150|GO:0016020	ataxin-2-like protein isoform B	5894.9	3012.63	12.5089	11.3397	6328.9	6079.88	5275.92	3074.35	3092.69	2870.86	12.6718	12.2703	12.5845	11.3019	11.4594	11.2579
ASHGA5P044634	0.000811149	0.0108175	4.42085	up	protein_coding	NM_001193630	CCDS55194.1	ZNF705B	RefSeq	1207	chr8	+	7783858	7809935	ENST00000525199, NM_001004328, NM_001039615	TGCAAGTGGAAATCCAGAGGAAGACAGAGAGAAACTGAGTTCCTGACAATGCATTCACTA	100132396	Hs.546691	GO:0003676|GO:0005622|GO:0006355|GO:0008270	zinc finger protein 705B	17.3533	5	4.48765	2.34333	17.5465	24.8922	9.62134	5	5	5	4.70726	4.73931	4.01638	2.34074	2.34646	2.34278
ASHGA5P013770	0.0287604	0.0868762	3.56502	up	protein_coding	NM_001004301	CCDS46172.1	ZNF813	RefSeq	4188	chr19	+	53970988	53997546	ENST00000458035, NM_001040185	ACGGCAGCGCGATTGACTTCTAAAGACTCTTGGTATGTGAGGAAGAAACCTGGAAGAGGA	126017	Hs.710780	GO:0003677|GO:0005634|GO:0006351|GO:0006355|GO:0008270	zinc finger protein 813	42.8569	22.1711	5.6357	3.80179	32.9375	70.3995	25.2338	23.2658	10.0717	33.1758	5.5291	6.07468	5.30331	3.95409	2.87225	4.57901
ASHGA5P009816	3.57319e-06	0.00166562	2.8613	up	protein_coding	NM_020963	CCDS853.1	MOV10	RefSeq	3653	chr1	+	113217047	113243368	NM_001130079	TCAAGATCAGCTTTGGGACCCCCGCCCCTGGCTTCTCCTCCATGCTGTATGGAATGAAGA	4343	Hs.514941	GO:0000932|GO:0003723|GO:0004386|GO:0005515|GO:0005524|GO:0005829|GO:0006351|GO:0006355|GO:0007219|GO:0035279	putative helicase MOV-10	13193.1	5388.74	13.6899	12.1732	13020.9	14692.2	11866.4	5613.89	5308.45	5243.88	13.6859	13.6252	13.7587	12.1769	12.2008	12.142
ASHGA5P051333	0.000135991	0.00475529	3.25033	up	protein_coding	ENST00000334678	CCDS13997.1	RPS19BP1	GENCODE	927	chr22	-	39925097	39928860		GTGTGAGGCTCGTGGGCGGAGCCAAGCGCCGCCATGTCCGCCGCCCTGCTGCGGCGGGGC	91582	Hs.526933	GO:0005737|GO:0005730|GO:0005654|GO:0005515	ribosomal protein S19 binding protein 1 [Source:HGNC Symbol;Acc:28749]	179.933	79.071	7.61629	5.9157	183.408	202.515	153.878	85.3293	69.2851	82.5987	7.77356	7.4046	7.6707	5.96197	5.82845	5.95669
ASHGA5P053066	0.0250735	0.0789735	2.0764	up	protein_coding	NM_015332	CCDS5490.2	NUDCD3	RefSeq	4932	chr7	-	44421964	44530385		TAGGGCGGGAGGCGACATGGAGACAGGGGCGGCCGAGCTGTATGACCAGGCCCTTTTGGG	23386	Hs.488171		nudC domain-containing protein 3	63.6288	50.279	6.22344	5.16936	51.1459	90.9263	48.8141	69.0958	47.1901	34.5512	6.1033	6.39923	6.1678	5.63105	5.23725	4.63978
ASHGA5P015151	0.0096474	0.0427167	3.0996	up	protein_coding	NM_001114171	CCDS46113.1	FOSB	RefSeq	3668	chr19	+	45971252	45978437		AGAGGAGACGGAGACAGATCAGTTGGAGGAAGAAAAAGCAGAGCTGGAGTCGGAGATCGC	2354	Hs.590958	GO:0000122|GO:0003677|GO:0003700|GO:0005634|GO:0007275|GO:0007610|GO:0008134|GO:0043565|GO:0046983|GO:0071277	protein fosB isoform 2	11.9302	5	3.97541	2.34333	5.95145	17.0261	12.8131	5	5	5	3.28046	4.23899	4.40678	2.34074	2.34646	2.34278
ASHGA5P000898	0.00370485	0.0242611	2.08228	up	protein_coding	NM_020530	CCDS13873.1	OSM	RefSeq	1869	chr22	-	30658818	30662829		TACTGCTCACACAGAGGACGCTGCTCAGTCTGGTCCTTGCACTCCTGTTTCCAAGCATGG	5008	Hs.248156	GO:0002675|GO:0005125|GO:0005147|GO:0005615|GO:0005900|GO:0006915|GO:0006955|GO:0007275|GO:0007422|GO:0008083|GO:0008283|GO:0008284|GO:0008285|GO:0009408|GO:0033138|GO:0040008|GO:0042503|GO:0042506|GO:0042508|GO:0043410|GO:0045835|GO:0045944|GO:0046888|GO:0048266|GO:0050731|GO:0051781	oncostatin-M preproprotein	161.421	108.943	7.46342	6.40526	185.41	177.708	121.145	113.905	108.002	104.924	7.7883	7.2489	7.35306	6.38534	6.50894	6.32149
ASHGA5P009159	0.00460504	0.0271734	2.56729	up	protein_coding	NM_172130	CCDS56.1	KCNAB2	RefSeq	4182	chr1	+	6086072	6161253		CCGGGATGATCTACAGGAACCTGGGCAAGTCTGGCCTGCGGGTCTCCTGCCTGGGACTTG	8514	Hs.440497	GO:0005249|GO:0005737|GO:0005886|GO:0007268|GO:0015459|GO:0016021|GO:0044224	voltage-gated potassium channel subunit beta-2 isoform 2	230.406	122.794	7.94394	6.5837	225.515	218.303	247.4	133.311	118.861	116.209	8.04814	7.50437	8.27931	6.63016	6.65743	6.4635
ASHGA5P013866	2.5689e-07	0.00111028	5.7423	up	protein_coding	NM_001130065	CCDS46010.1	MYO9B	RefSeq	7652	chr19	+	17186590	17324104		CAGTATTAAGGGCCCCCTGCGCCTGCTCTCCCTTGCCCCGGCGCGCCCACCCCGAGCCCC	4650	Hs.123198	GO:0000146|GO:0003779|GO:0005100|GO:0005515|GO:0005516|GO:0005524|GO:0005737|GO:0005829|GO:0005938|GO:0006200|GO:0007264|GO:0007266|GO:0015629|GO:0016459|GO:0016887|GO:0030048|GO:0031941|GO:0032011|GO:0032321|GO:0042803|GO:0043531|GO:0046872|GO:0048471|GO:0051056	unconventional myosin-IXb isoform 2	19744.5	4053.46	14.2983	11.7767	19971.4	22704.2	16558.1	4298.89	3930.72	3930.76	14.3347	14.3176	14.2427	11.8115	11.7846	11.7339
ASHGA5P053129	0.00443158	0.026661	2.51607	up	protein_coding	NM_001003795	CCDS34659.1	GTF2IRD2B	RefSeq	3595	chr7	+	74508346	74565623		GGGAAAGAAAGAAAGAGAAAAAGGAGGGCGAGTGGCGAGCAGGGGCCTCGGCCGCCACCC	389524		GO:0003677|GO:0005634|GO:0006351|GO:0006355|GO:0008270	general transcription factor II-I repeat domain-containing protein 2B	152.074	87.8493	7.38561	6.05444	160.773	182.658	112.791	108.62	87.1173	67.8104	7.61686	7.28057	7.2594	6.31459	6.18471	5.66403
ASHGA5P014244	0.000777644	0.010663	2.75832	up	protein_coding	NM_001166240	CCDS54339.1	CGREF1	RefSeq	1123	chr2	-	27322220	27341995		CACCAACCCGGGCAACCTGGACGCCAGGCTGGATGGAGGGGAGAAGGCGATGCAGCCGCA	10669	Hs.159525	GO:0005509|GO:0005576|GO:0006950|GO:0007050|GO:0007155|GO:0008285	cell growth regulator with EF hand domain protein 1 isoform b precursor	11.5248	7.02521	4.03346	2.56967	9.66031	12.951	11.9631	5.48723	6.47469	9.11372	3.90336	3.88375	4.31329	2.44143	2.56378	2.7038
ASHGA5P042181	0.000961206	0.0118116	3.7514	up	protein_coding	NM_005299	CCDS5299.1	GPR31	RefSeq	960	chr6	-	167570359	167571319		TGATGCACATCTTCCAGAATCTGGGGAGCTGCAGGGCCCTTTGTGCAGTGGCTCATACCT	2853	Hs.248124	GO:0004930|GO:0005887|GO:0007186	12-(S)-hydroxy-5,8,10,14-eicosatetraenoic acid receptor	29.78	14.9821	5.25588	3.34845	33.5035	35.5081	20.3285	13.0155	16.2202	15.7105	5.55153	5.19565	5.02047	3.05381	3.57244	3.4191
ASHGA5P021712	0.000306754	0.00678501	4.59887	up	protein_coding	ENST00000538962	CCDS55331.1	PTGR1	GENCODE	1220	chr9	-	114312001	114362135		CTTGCTGAAATGGGTCTTAGAGATCAAAAGAGAAAATGAAGAAGATTGAAGCTTCAAAGC	22949	Hs.584864	GO:0055114|GO:0009636|GO:0005737|GO:0000166|GO:0008270|GO:0016491|GO:0016747|GO:0032440|GO:0047522	prostaglandin reductase 1 [Source:HGNC Symbol;Acc:18429]	218.747	67.5599	7.8698	5.66852	220.128	250.158	185.955	78.3779	69.5367	54.7651	8.01209	7.69267	7.90465	5.82975	5.834	5.34181
ASHGA5P015720	7.85723e-06	0.00192939	7.90077	up	protein_coding	NM_001161725	CCDS53912.1	PPP2R5C	RefSeq	4494	chr14	+	102228134	102394328		TCAAAAGAAGGACAAGACACAGTAGAATCAGAGGGAACAAGTCCTGAAGAACCCTCAAGC	5527	Hs.368264	GO:0000159|GO:0000159|GO:0000775|GO:0005515|GO:0005634|GO:0006977|GO:0007165|GO:0008285|GO:0008601|GO:0008601|GO:0042771|GO:0043161	serine/threonine-protein phosphatase 2A 56 kDa regulatory subunit gamma isoform isoform e	32.9619	5.77797	5.41608	2.43408	29.6973	40.1734	29.015	5	7.33392	5	5.393	5.35926	5.49597	2.34074	2.61873	2.34278
ASHGA5P008919	0.0107442	0.0456606	2.23356	up	protein_coding	NM_001099431	CCDS41751.1	CLEC1B	RefSeq	883	chr12	-	10145661	10151899		ATATTAAAACTCGGAAACCAGCTCTCATCTCCGCTGTCATGCAGCGCAATTACCTACAAG	51266	Hs.409794	GO:0004888|GO:0005515|GO:0005887|GO:0006952|GO:0007166|GO:0030246	C-type lectin domain family 1 member B isoform b	202.37	125.455	7.77544	6.6161	224.867	187.501	194.741	131.606	131.299	113.461	8.04362	7.31271	7.96999	6.60944	6.80998	6.42887
ASHGA5P029135	0.00384936	0.0247457	6.30501	up	protein_coding	NM_001160148	CCDS53895.1	DDHD1	RefSeq	12969	chr14	-	53503457	53620046		TTAATCTCCCACAACTTCTTTTTCCGGAAAATGTAATGCAGAATAAAGATAATGCCCTCG	80821	Hs.125525	GO:0005737|GO:0016042|GO:0016787|GO:0046872	phospholipase DDHD1 isoform c	7491.76	1221.12	12.6624	10.0059	4866.72	13557.5	4051.06	1410.37	1226.97	1026.02	12.2991	13.4986	12.1894	10.1645	10.1239	9.72919
ASHGA5P043912	0.0047159	0.0276682	2.26482	up	protein_coding	NM_153758	CCDS1468.1	IL19	RefSeq	1048	chr1	+	206972214	207016326		CACATGTGCACACACATATCCATGTGTGTGTGCCAGTGCTTTGGGGCTCTGTTCCACGGG	29949	Hs.661017	GO:0005125|GO:0005576|GO:0005615|GO:0006915|GO:0006917|GO:0006955|GO:0007165|GO:0042226|GO:0072593	interleukin-19 isoform 1	68.3607	48.9623	6.36369	5.1843	56.8588	75.5454	72.6777	54.5886	50.7168	41.5814	6.24101	6.16454	6.68553	5.2768	5.34634	4.92975
ASHGA5P052657	0.000158899	0.00507901	3.27718	up	protein_coding	NM_032955	CCDS34398.1	AIF1	RefSeq	503	chr6	+	31583788	31584798	NM_004847	ATCCCTTCTGCTCTCTCCCCTCACCCAGAGAAATACATGGAGTTTGACCTTAATGGAAAT	199	Hs.76364	GO:0001774|GO:0001891|GO:0001934|GO:0003674|GO:0005509|GO:0005634|GO:0005634|GO:0005737|GO:0005829|GO:0005884|GO:0006911|GO:0006954|GO:0006954|GO:0010629|GO:0014739|GO:0016601|GO:0030027|GO:0030041|GO:0031668|GO:0032587|GO:0032870|GO:0042102|GO:0043066|GO:0043204|GO:0045429|GO:0048471|GO:0048661|GO:0048662|GO:0048678|GO:0051015|GO:0051017|GO:0051602|GO:0071346|GO:0071346|GO:0071672|GO:0071673|GO:…	allograft inflammatory factor 1 isoform 1	21410.7	7642.68	14.4063	12.6939	19991.9	27756.5	16483.8	8113.36	7531.5	7283.18	14.3386	14.6432	14.2372	12.7219	12.7083	12.6515
ASHGA5P049235	0.000984619	0.0118869	3.34446	up	protein_coding	ENST00000334346	CCDS10765.1	MT1B	GENCODE	380	chr16	+	56685810	56687116		TATCTTGCCTAGGAACTCCAGGCTTGTCTTGGCTCCAAATGGATCCCAACTGCTCCTGCA	4490	Hs.656629	GO:0071294|GO:0045926|GO:0005634|GO:0005737|GO:0048471|GO:0008270|GO:0046872|GO:0005507|GO:0046870	metallothionein 1B [Source:HGNC Symbol;Acc:7394]	865.756	309.398	9.73882	7.99705	780.331	900.295	916.641	315.408	316.724	296.062	9.70524	9.43876	10.0725	7.95077	8.15777	7.8826
ASHGA5P034613	0.000121956	0.00452051	2.59428	up	protein_coding	NM_001004318	CCDS33018.1	PAPL	RefSeq	2962	chr19	+	39574944	39602128		TCATTGAACCCGTGGCTGCCAGCCTGCCGTACATGACATGCCCTGGGAATCATGAAGAAC	390928	Hs.448934	GO:0003993|GO:0005576|GO:0046872	iron/zinc purple acid phosphatase-like protein precursor	138.471	78.3321	7.27576	5.90043	119.155	172.432	123.825	89.9569	71.2803	73.7591	7.23151	7.20823	7.38754	6.03956	5.875	5.78672
ASHGA5P010201	0.00190923	0.0167445	3.05021	up	protein_coding	NM_001164530	CCDS54330.1	ZNF135	RefSeq	2470	chr19	+	58570606	58581110	NM_001164529, NM_003436, NM_007134	GTGAGTGTGGCAAGGCCTTTACCCACAGCTCCTCCCTTACCAAGCACCAGAGAACTCACA	7694	Hs.85863	GO:0003677|GO:0003700|GO:0005634|GO:0006351|GO:0006355|GO:0007010|GO:0008270|GO:0022604	zinc finger protein 135 isoform 5	963.913	377.643	9.89177	8.28287	1043.1	971.521	877.121	415.531	389.963	327.437	10.1323	9.53893	10.0041	8.36403	8.454	8.03057
ASHGA5P018347	0.00850433	0.0394544	3.36396	up	protein_coding	NM_001101653	CCDS44571.1	COMMD9	RefSeq	2880	chr11	-	36293841	36310999		TTTTGCAGCACTCCAGAGCCTGCTCAAGCTGCTCCAGGCTCTGCACCGCCTCACTAGGCT	29099	Hs.279836		COMM domain-containing protein 9 isoform 2	197.575	88.523	7.73571	5.98555	182.508	232.684	177.533	71.0302	59.4863	135.052	7.7668	7.59614	7.84421	5.67269	5.58925	6.69472
ASHGA5P050389	0.00143847	0.0144803	4.04596	up	protein_coding	NM_012344	CCDS1681.1	NTSR2	RefSeq	1622	chr2	-	11798303	11810329		GACTCCGGGCAGTGAGAGGGAGGGAGCGCCGGCCGCGGGAGCGGGATGGAAACCAGCAGC	23620	Hs.131138	GO:0004930|GO:0005886|GO:0005887|GO:0007166|GO:0007200|GO:0007600|GO:0016492|GO:0042391	neurotensin receptor type 2	30.6574	13.8544	5.23136	3.21488	19.116	47.7668	25.0893	17.1917	11.8176	12.5537	4.8142	5.58394	5.29594	3.46748	3.08584	3.0913
ASHGA5P011200	0.000938261	0.0116394	2.54999	up	protein_coding	ENST00000369971	CCDS41362.1	CLCC1	GENCODE	4825	chr1	-	109472129	109506111		GATCCCGGACGATGCTGTGTTCTTTGCTCCTTTGTGAATGTCTGTTGCTGGTAGCTGGTT	23155	Hs.658489	GO:0016021|GO:0005634|GO:0005783|GO:0043231|GO:0005794|GO:0005792|GO:0005254	chloride channel CLIC-like 1 [Source:HGNC Symbol;Acc:29675]	795.045	368.668	9.61047	8.25998	854.368	833.521	697.246	398.771	331.145	376.088	9.84099	9.32265	9.66778	8.30748	8.22844	8.24403
ASHGA5P009594	6.09393e-05	0.00329051	3.45126	up	protein_coding	NM_006983	CCDS30559.1	MMP23B	RefSeq	1246	chr1	+	1567559	1570030		CGCAGCGCAGGGAGACGTCGCTGCGCTGGGCCTCTCGGCGGTCCCCCCCACCCGGGTCCC	8510	Hs.192316	GO:0000003|GO:0004222|GO:0004222|GO:0005578|GO:0005622|GO:0005789|GO:0006508|GO:0008237|GO:0008270|GO:0016021	matrix metalloproteinase-23 precursor	1921.65	646.823	10.8929	9.10576	1958.29	2138.31	1668.34	656.402	589.055	695.012	11.0225	10.7067	10.9494	9.05512	9.09092	9.17124
ASHGA5P008903	0.00150273	0.0147609	8.76095	up	protein_coding	NM_023001	CCDS9733.1	ARID4A	RefSeq	5585	chr14	+	58765221	58840451		GAAAAGAATGGAACAGATGAATTAGATAATATGAACAGTACAGAGAGAATCTCATTTCTC	5926	Hs.161000	GO:0003677|GO:0003700|GO:0005634|GO:0005634|GO:0006366|GO:0017053|GO:0045892	AT-rich interactive domain-containing protein 4A isoform III	55.7458	10.4327	5.97197	2.84088	31.4703	91.1222	44.6449	16.1865	5	10.1115	5.46898	6.40096	6.04598	3.38249	2.34646	2.79369
ASHGA5P009667	0.00388581	0.0247665	2.31229	up	protein_coding	NM_025220	CCDS13058.1	ADAM33	RefSeq	3594	chr20	-	3648619	3662738		ACCTAGAATGGTGTGCCAGAGCAGGCGCTGCAGGAAGAATGCCTTCCAGGAGCTTCAGCG	80332	Hs.173716	GO:0004222|GO:0006508|GO:0008270|GO:0016021	disintegrin and metalloproteinase domain-containing protein 33 isoform alpha preproprotein	13.1594	11.1476	4.1698	2.96047	11.1558	18.0581	10.2643	14.0945	12.0906	7.25757	4.0943	4.31434	4.10075	3.17458	3.12149	2.58534
ASHGA5P049158	6.50657e-07	0.00125011	7.12221	up	protein_coding	ENST00000398841	CCDS42147.1	YPEL3	GENCODE	1588	chr16	-	30103634	30107521	NM_001145524	TCCCCGGCAGGCACTGGGCTCCCTCTGCTCCCCGTGGGCCGCTCCCCGCGTGGGGCCACT	83719	Hs.513491	GO:0005730	yippee-like 3 (Drosophila) [Source:HGNC Symbol;Acc:18327]	24446	4149.38	14.6402	11.8079	25820.2	27190.6	20327.2	4484.53	3980.97	3982.63	14.7188	14.6192	14.5825	11.8642	11.8037	11.7557
ASHGA5P034712	0.000134098	0.00473507	4.08202	up	protein_coding	NM_017636	CCDS33073.1	TRPM4	RefSeq	4103	chr19	+	49661015	49715098		AGCTGCTGCTCTATTTCTGGGCTTTCACGCTGCTGTGCGAGGAACTGCGCCAGGGCCTGA	54795	Hs.467101	GO:0002407|GO:0002724|GO:0005227|GO:0005262|GO:0005516|GO:0005524|GO:0005783|GO:0005794|GO:0005886|GO:0008284|GO:0016021|GO:0016925|GO:0090263	transient receptor potential cation channel subfamily M member 4 isoform 1	423.864	134.013	8.74106	6.71177	338.68	525.686	407.226	155.229	123.321	123.487	8.58757	8.68639	8.94921	6.86651	6.71467	6.55414
ASHGA5P007966	3.96615e-06	0.00174915	2.77155	up	protein_coding	NM_001002031	CCDS31812.1	ATP5G2	RefSeq	1178	chr12	-	54058943	54070512		GATGCCTGAGCTGATCCTCTCTCCTGCCACAGCTCCTCACCCCCTGAAAATGTTCGCCTG	517	Hs.524464	GO:0005215|GO:0005753|GO:0008289|GO:0015078|GO:0015986|GO:0015991|GO:0016021|GO:0045263	ATP synthase lipid-binding protein, mitochondrial isoform a precursor	10850.7	4474.34	13.3797	11.909	11132.4	12258.1	9161.72	4812.24	4187.62	4423.17	13.4419	13.3232	13.3741	11.9512	11.8677	11.9082
ASHGA5P054184	0.00260146	0.0200634	2.40971	up	protein_coding	NM_001146151	CCDS55539.1	AVPR2	RefSeq	1788	chrX	+	153170528	153172620		CCTCTGGAAGGTGGGTGTAGCCGTGGCTAGGGCTGACGGGGCCACTTGGGCTTGGCCGCA	554	Hs.567240	GO:0003084|GO:0005000|GO:0005768|GO:0005783|GO:0005794|GO:0005886|GO:0005887|GO:0006833|GO:0007188|GO:0007190|GO:0007249|GO:0007588|GO:0007599|GO:0008284|GO:0010628|GO:0016021|GO:0021537|GO:0031398|GO:0032609|GO:0034097|GO:0035811|GO:0035814|GO:0055085	vasopressin V2 receptor isoform 2	19.0413	15.7223	4.69075	3.42189	15.0241	21.3331	20.7668	17.6735	14.9581	14.5352	4.49187	4.53123	5.04914	3.51161	3.44964	3.30442
ASHGA5P010236	0.000232034	0.00599791	3.93522	up	protein_coding	NM_016022	CCDS41391.1	APH1A	RefSeq	2290	chr1	-	150237798	150241609	NM_001077628, NR_045035	TGGTCGCAGGGGCATTTTTCTGGCTGGTCTCCCTGCTCCTGGCCTCTGTGGTCTGGTTCA	51107	Hs.108408	GO:0001656|GO:0004175|GO:0005515|GO:0005783|GO:0005789|GO:0005794|GO:0005886|GO:0005887|GO:0006509|GO:0006915|GO:0007219|GO:0007220|GO:0007220|GO:0008624|GO:0016485|GO:0031293|GO:0031293|GO:0032580|GO:0042987|GO:0042987|GO:0043085|GO:0048011	gamma-secretase subunit APH-1A isoform 2	4269.82	1255.39	12.0389	10.0624	4290.42	4280.58	4238.46	1322.05	1234.89	1209.22	12.1133	11.7504	12.253	10.0778	10.138	9.97143
ASHGA5P002493	0.000104112	0.00421497	3.1696	up	protein_coding	NM_001145057	CCDS8206.2	IL18BP	RefSeq	1371	chr11	+	71710662	71713574	NM_001039659, NM_001039660, NM_173042	CCAGCTCTGGGCTGGGCTGAGGGCAACCTTGCCCCCCACCCAAGAAGCCCTGCCCTCCAG	10068	Hs.591967	GO:0005576|GO:0005615|GO:0032496|GO:0042007|GO:0042088|GO:0048019|GO:0070301|GO:0071356|GO:1900116	interleukin-18-binding protein isoform a precursor	25849.5	9763.16	14.7182	13.0539	28730.2	28690.8	20127.6	10619.5	9741.06	8928.87	14.8898	14.7063	14.5585	13.1313	13.0707	12.9598
ASHGA5P051475	0.000711001	0.0101686	3.53808	up	protein_coding	NM_173658	CCDS2716.1	ZNF660	RefSeq	2205	chr3	+	44626455	44637557		AACCTCATAAATAACAAATATTGTGGGTAGTAGGGCTGACTGCTGCTTTTCTAAAAAGTA	285349	Hs.733134	GO:0003677|GO:0005634|GO:0006351|GO:0006355|GO:0008270	zinc finger protein 660	258.296	100.667	8.09854	6.27557	237.331	292.094	245.462	107.354	110.684	83.9631	8.11543	7.9107	8.26949	6.2965	6.54773	5.98249
ASHGA5P031084	0.00010435	0.00421497	3.56894	up	protein_coding	NM_012248	CCDS42150.1	SEPHS2	RefSeq	2291	chr16	-	30454951	30457224		CCGGACGTGCGGCCCCCGCTGGGCCGGGGCCTGGTGGGTGGCCAGGAAGAGGCGTCCCAG	22928	Hs.118725	GO:0004756|GO:0005524|GO:0005575|GO:0016260	selenide, water dikinase 2	25.1563	13.7127	5.04927	3.21378	22.247	32.346	20.876	12.6252	12.7297	15.7831	5.01328	5.0762	5.05833	3.01655	3.20051	3.42427
ASHGA5P019351	0.00157252	0.0151368	2.19049	up	protein_coding	ENST00000543067	CCDS55389.1	CNKSR2	GENCODE	4355	chrX	+	21392535	21660980		TGAAGTGATTCAAGTTAATCATCAGACTGTGCCTCTTATACCTAGAAGTCCCACAAGCAG	22866	Hs.555917	GO:0009966|GO:0005737|GO:0016020|GO:0043005|GO:0045211|GO:0043025|GO:0005515|GO:0005543	connector enhancer of kinase suppressor of Ras 2 [Source:HGNC Symbol;Acc:19701]	88.301	60.3758	6.63697	5.50572	82.4364	124.454	58.013	65.7859	60.2304	55.1113	6.73131	6.79103	6.38857	5.55567	5.60975	5.35173
ASHGA5P001060	0.000943903	0.0116759	3.55384	up	protein_coding	NM_024306	CCDS10911.1	FA2H	RefSeq	2450	chr16	-	74746855	74808729		TAAGACTGTCTGGTACAGTGTCCCCATCATCTGGGTGCCCCTGGTGCTGTATCTCAGCTG	79152	Hs.461329	GO:0001949|GO:0005506|GO:0005789|GO:0006633|GO:0006665|GO:0008219|GO:0016021|GO:0020037|GO:0022900|GO:0030258|GO:0032286|GO:0032287|GO:0042127|GO:0042634|GO:0080132	fatty acid 2-hydroxylase	937.411	317.818	9.85797	8.02859	977.512	914.83	919.89	353.728	269.122	330.604	10.0356	9.46011	10.0782	8.13003	7.9107	8.04505
ASHGA5P050042	6.01967e-05	0.00328498	5.50651	up	protein_coding	ENST00000330475	CCDS12071.1	ADAMTSL5	GENCODE	2857	chr19	-	1505016	1513188		TGTTCCCCAGGCCCCACCTCTTCCAGAACCTCCTGCTCTTCCTGTGGGCCCTGCTGAACT	339366	Hs.371674	GO:0005578|GO:0031012|GO:0004222|GO:0008270|GO:0005515	ADAMTS-like 5 [Source:HGNC Symbol;Acc:27912]	12794.9	2664.61	13.608	11.1469	11769.3	17021.5	9593.89	2928.45	2426.27	2639.11	13.536	13.8652	13.4228	11.2302	11.0924	11.118
ASHGA5P025227	9.94999e-05	0.00411127	3.69445	up	protein_coding	NM_001242704		ZNF385C	RefSeq	2596	chr17	-	40177593	40190044		GGTCTGGCTGCAGGCCCGGCCTCCGGCGCCCCCAGCCCCCTGCTGGCCTCCCTGCCCCTG	201181	Hs.443140	GO:0003676|GO:0005634|GO:0008270	zinc finger protein 385C	9413.76	2958.49	13.1955	11.3102	10099.5	9555.18	8586.6	3034.14	2677.31	3164.03	13.3204	12.9841	13.2822	11.2817	11.2269	11.4219
ASHGA5P008725	0.0005006	0.00864055	2.15129	up	protein_coding	NM_053026	CCDS43141.1	MYLK	RefSeq	7645	chr3	-	123331142	123603149	NM_053028	AAACTGTCAAGTTCAGATGTGAAGGGCTTGCCGTGATGGAGGTGGCCCCCTCCTTCTCCA	4638	Hs.477375	GO:0001725|GO:0003779|GO:0004687|GO:0005515|GO:0005516|GO:0005524|GO:0005737|GO:0005829|GO:0005886|GO:0006468|GO:0006936|GO:0006939|GO:0014820|GO:0030027|GO:0030335|GO:0032060|GO:0032154|GO:0046872|GO:0051928|GO:0060414|GO:0071476|GO:0090303	myosin light chain kinase, smooth muscle isoform 2	109.804	77.1483	6.98411	5.87891	102.037	126.051	101.323	86.8516	69.3399	75.2533	7.02284	6.8094	7.1201	5.98978	5.83009	5.81687
ASHGA5P046812	0.00296811	0.0215382	4.00979	up	protein_coding	ENST00000457222	CCDS48204.1	TSPY3	GENCODE	1161	chrY	+	9236029	9238826	NM_001164471, NM_001197242, NM_001243721, NM_003308, NM_022573	AGTGAGCAGGCGGCTTTGGGGGAGGAGGCGGTGCTGCTGTTGGATGACATAATGGCGGAG	728137	Hs.730364	GO:0030154|GO:0007283|GO:0006334|GO:0007506|GO:0005634|GO:0005737	testis specific protein, Y-linked 3 [Source:HGNC Symbol;Acc:33876]	327.544	104.277	8.30394	6.30041	269.44	521.526	191.666	140.471	91.2545	81.1063	8.29067	8.67536	7.94579	6.71477	6.25812	5.92835
ASHGA5P051909	0.00333288	0.0230402	5.15104	up	protein_coding	NM_001130726	CCDS47036.1	CCDC149	RefSeq	3978	chr4	-	24807738	24914600		AGGAGGCCGGCCAGCGCATGGAGGAGGAGGCCATGAACGGCGACCGGACTGAGAGCGACT	91050	Hs.106432		coiled-coil domain-containing protein 149 isoform 2	38.3392	14.5426	5.59506	3.2302	34.6125	50.2621	30.1432	23.1391	8.02064	12.4681	5.59377	5.64021	5.55121	3.94525	2.66418	3.08118
ASHGA5P012072	0.000373569	0.00746837	2.53606	up	protein_coding	NM_001135248	CCDS44071.1	MFAP2	RefSeq	1121	chr1	-	17300998	17307173	NM_002403	ACCCGGACAGCTGTCCTCTCTGACACCACCCCGGCCTGCCTCTTTGTTGCCATGAGAGCT	4237	Hs.389137	GO:0001527|GO:0001968|GO:0030220|GO:0070051	microfibrillar-associated protein 2 isoform b precursor	1731.13	787.595	10.7448	9.4022	1718.03	1873.03	1602.32	832.302	741.169	789.313	10.8359	10.5075	10.891	9.41109	9.42529	9.37023
ASHGA5P009715	0.00130048	0.0138195	3.24092	up	protein_coding	NM_003078	CCDS5924.1	SMARCD3	RefSeq	1728	chr7	-	150936058	150974231	NM_001003802	CGTGGTACAGCGCCCCGGGATGCCGTCTGGAGCCCGGATGCCCCACCAGGGGGCGCCCAT	6604	Hs.647067	GO:0000790|GO:0002052|GO:0003139|GO:0003219|GO:0003407|GO:0003713|GO:0005102|GO:0005515|GO:0005634|GO:0005654|GO:0005737|GO:0006337|GO:0006338|GO:0006338|GO:0006351|GO:0006357|GO:0006357|GO:0008134|GO:0016514|GO:0016514|GO:0016922|GO:0030374|GO:0035257|GO:0042692|GO:0043393|GO:0044255|GO:0044281|GO:0045893|GO:0071564|GO:0071564|GO:0071565	SWI/SNF-related matrix-associated actin-dependent regulator of chromatin subfamily D member 3 isoform 1	931.717	341.821	9.84479	8.14839	1038.73	921.555	834.861	345.219	349.615	330.63	10.1275	9.4691	9.93782	8.09569	8.30399	8.04549
ASHGA5P009489	7.21195e-06	0.00185761	4.34808	up	protein_coding	NM_052837	CCDS1106.1	SCAMP3	RefSeq	1517	chr1	-	155225769	155232176		CCCCTTTCAGCCACCACCAGCCTATGAGCCTCCAGCCCCTGCCCCATTGCCTCCACCCTC	10067	Hs.200600	GO:0000139|GO:0006892|GO:0015031|GO:0016021|GO:0032526	secretory carrier-associated membrane protein 3 isoform 2	27225	7580.92	14.8073	12.6869	27025.8	31900.4	22748.9	7765.98	6996.15	7980.61	14.8029	14.8916	14.7274	12.6596	12.6138	12.7873
ASHGA5P014085	0.0268865	0.0829374	2.23394	up	protein_coding	NM_001033714	CCDS44811.1	NOP2	RefSeq	2772	chr12	-	6666035	6677498		AAGAGTGGCAGCACTGACCTGGTCTGGGACGTGGGGAGAAGGTACCATGGGGCGCAAGTT	4839	Hs.534334	GO:0003723|GO:0005515|GO:0005634|GO:0005730|GO:0006364|GO:0008284|GO:0008757	putative ribosomal RNA methyltransferase NOP2 isoform 1	17.6473	15.9402	4.57999	3.4204	22.3572	14.3238	16.2609	18.2917	11.9297	17.5993	5.0211	4.01057	4.70831	3.56407	3.0983	3.59883
ASHGA5P037507	3.24413e-08	0.000408438	5.30728	up	protein_coding	ENST00000334662	CCDS13713.1	KRTAP10-8	GENCODE	876	chr21	+	46031995	46032871	ENST00000400365, NM_198690, NM_198693	TGCTGTGTGCCTGTCTGCTCTGGGGCTTCCTCTCTGTGCTGCCAGAAGTCTAGCTGCCAG	386681	Hs.528021	GO:0045095	keratin associated protein 10-8 [Source:HGNC Symbol;Acc:20525]	17880.6	3966.34	14.1536	11.7456	17154.4	20922.3	15565.1	4144.77	3854.01	3900.26	14.1217	14.1783	14.1607	11.758	11.7574	11.7214
ASHGA5P005594	0.00313025	0.0222427	2.74607	up	protein_coding	NM_138418	CCDS10415.1	FAM195A	RefSeq	928	chr16	+	691848	698474		CGCCGCACAGGTCCCACGCAGCAGCAGGTGGAGGGCCGGCTCGGCGAGCTCCTGAAATGC	84331	Hs.732507		protein FAM195A	24.2782	17.008	4.97219	3.51482	18.5575	34.5619	19.7154	19.7683	12.0318	19.2238	4.77652	5.16238	4.97766	3.69424	3.11517	3.73506
ASHGA5P053788	0.00137389	0.0141989	2.01025	up	protein_coding	NM_017832	CCDS6774.1	FAM206A	RefSeq	1925	chr9	+	111696672	111703237		GCGGAGGAAGCGCTGGGGTCCCGGAGGGCGGGGGTGGCGGCGCCGGAGGTCGCCATGGCT	54942	Hs.29276	GO:0005960|GO:0006546	protein FAM206A	53.6749	43.6187	6.0178	5.01042	40.9114	73.56	46.5532	50.1274	40.3398	40.3888	5.81499	6.13617	6.10224	5.14825	4.99739	4.88564
ASHGA5P051327	0.000436693	0.0079852	2.40896	up	protein_coding	NM_014292	CCDS13980.1	CBX6	RefSeq	3284	chr22	-	39260247	39268258		TGATGTGCATTTCTCTGTCAAGCCGAGCGCCAGTGCCTCCTCGCCCAAGCTGCACTCCAG	23466	Hs.592201	GO:0000122|GO:0000792|GO:0003727|GO:0005515|GO:0005634|GO:0006351|GO:0016568|GO:0031519	chromobox protein homolog 6	726.234	354.898	9.46657	8.19816	758.613	860.794	559.296	389.401	340.428	334.864	9.66242	9.36865	9.36865	8.26513	8.26592	8.06344
ASHGA5P050107	0.000615634	0.00948503	2.52239	up	protein_coding	NM_016264	CCDS45988.1	ZNF44	RefSeq	2674	chr19	-	12382624	12405714	NM_001164276	CCCTATGAATGTAAGGAATGTGGGAAAGCCTTCAGTTCTCTCAGTTCCTTTAATAGACAT	51710	Hs.296731	GO:0003677|GO:0005634|GO:0005730|GO:0005737|GO:0006351|GO:0006355|GO:0008270|GO:0015630	zinc finger protein ZnFP12 isoform 2	13819.8	6196.57	13.727	12.3922	11896.7	18510.3	11052.4	6269.11	6131.36	6189.25	13.5509	13.9908	13.6392	12.343	12.4247	12.4088
ASHGA5P021642	0.0210161	0.0703686	2.01932	up	protein_coding	ENST00000537045	CCDS54496.1	DGCR2	GENCODE	4361	chr22	-	19023794	19109967	NM_001173534, NR_033674	CTGCGGCCAGAAGTGACCGGGGAGGTGCGTCCTCATCATGGGAAGGAGGCTGTGGATCCG	9993	Hs.517357	GO:0007155|GO:0009887|GO:0016021|GO:0004872|GO:0005515|GO:0030246	DiGeorge syndrome critical region gene 2 [Source:HGNC Symbol;Acc:2845]	13.8	14.0364	4.2595	3.24563	11.1975	13.4167	16.7857	13.3003	12.6619	16.1471	4.09925	3.92804	4.7512	3.08447	3.19083	3.46158
ASHGA5P011949	0.00404787	0.0253476	6.14261	up	protein_coding	NM_032012	CCDS43858.1	TMEM245	RefSeq	8006	chr9	-	111777414	111882225		GGGCTTGGAAAATTCTTGTTAAAAGTTGATAGCAAGCTCTGGCACTGGCTAAATAAGAAG	23731	Hs.308074	GO:0003674|GO:0008150|GO:0016021	transmembrane protein 245	76.0745	18.0116	6.23004	3.61119	36.4175	148.573	43.2332	22.7838	13.9098	17.3412	5.66316	7.02063	6.00632	3.92216	3.33758	3.57383
ASHGA5P002956	0.00165746	0.0154453	3.10118	up	protein_coding	NM_002830	CCDS2129.1	PTPN4	RefSeq	11381	chr2	+	120517206	120742474		GAAAAGAATTGCATGAATCTAGAGAAACATTATTGGGATTTAATATGGTGAATTACAGAG	5775	Hs.469809	GO:0004726|GO:0005515|GO:0005737|GO:0005856|GO:0006470|GO:0008092|GO:0009898	tyrosine-protein phosphatase non-receptor type 4	113.43	54.2051	6.95554	5.32272	80.706	169.252	90.3319	67.8678	50.2659	44.4816	6.70378	7.18418	6.97866	5.60447	5.33371	5.02998
ASHGA5P000706	0.0103477	0.0445799	2.85685	up	protein_coding	NM_032607	CCDS12121.1	CREB3L3	RefSeq	2586	chr19	+	4153628	4173048		AAGAAAGCAGGAAGAAGAAGAAGGAATATATCGATGGCCTGGAGACTCGGATGTCAGCTT	84699	Hs.247744	GO:0003700|GO:0005515|GO:0005634|GO:0005730|GO:0005737|GO:0005789|GO:0006351|GO:0006986|GO:0016021|GO:0043565|GO:0046983	cyclic AMP-responsive element-binding protein 3-like protein 3	33.3291	21.461	5.3917	3.87727	37.6865	41.1949	21.1058	23.9069	25.5082	14.968	5.70838	5.39343	5.07328	4.00063	4.28335	3.34783
ASHGA5P054001	0.0195145	0.0670443	2.08745	up	protein_coding	NM_144968	CCDS14353.1	RIBC1	RefSeq	1954	chrX	+	53449833	53456776		ATGAGAATTATACAGGTAAGCAGCCCGGCCCTCCAGACTCAGAGACCTGAGGCCTAGTGG	158787	Hs.351743		RIB43A-like with coiled-coils protein 1 isoform 2	1138.34	631.378	10.1367	9.07496	1319.28	1023.47	1072.26	643.359	655.606	595.169	10.4804	9.61276	10.3169	9.02998	9.24973	8.94516
ASHGA5P021168	0.000274363	0.00644495	3.74433	up	protein_coding	NM_001164470	CCDS53638.1	MS4A12	RefSeq	1044	chr11	+	60260250	60274901		TTAAAGAAGAAGCAAAGGCACTAGGGTTTATTATCTCTGGCTCTCTCTCTGTGTCAGCAT	54860	Hs.272789	GO:0016021	membrane-spanning 4-domains subfamily A member 12 isoform 2	537.418	180.82	9.07672	7.17202	495.221	588.368	528.664	210.105	162.7	169.653	9.08771	8.84087	9.30159	7.33052	7.15015	7.03538
ASHGA5P008969	0.000212125	0.00575408	2.60177	up	protein_coding	ENST00000349339	CCDS13270.1	C20orf152	GENCODE	1927	chr20	+	34556528	34618622		AGAAATTTTGGCCTTCCTTCCAGAGGGTGAATGCGACACACGACCCTTGATCCTGATGAG	140894	Hs.732697		chromosome 20 open reading frame 152 [Source:HGNC Symbol;Acc:16145]	223.988	118.028	7.90271	6.52321	213.679	264.009	194.278	132.546	114.097	107.44	7.96983	7.7707	7.96758	6.62144	6.59378	6.35441
ASHGA5P004476	0.000612373	0.00948197	14.0357	up	protein_coding	NM_012481	CCDS11346.1	IKZF3	RefSeq	9686	chr17	-	37913967	38020441	NM_001257408, NM_001257410, NM_183228, NM_183230, NR_047559, NR_047560	ACACATTCTGTGGAGAAACCCTACAAATGTGAGTTTTGTGGAAGGAGTTACAAGCAGAGA	22806	Hs.444388	GO:0003700|GO:0005515|GO:0005634|GO:0005737|GO:0005886|GO:0006351|GO:0006357|GO:0007498|GO:0008270|GO:0030888|GO:0042113|GO:0042803|GO:0042981|GO:0043565|GO:0045577|GO:0045619|GO:0046982	zinc finger protein Aiolos isoform 1	175.42	19.4891	7.51253	3.70151	114.263	270.948	141.049	24.8764	21.7456	11.8452	7.17996	7.80194	7.5557	4.06212	4.03095	3.01145
ASHGA5P043089	0.000565405	0.00909203	10.3944	up	protein_coding	NM_178558	CCDS34644.1	ZNF680	RefSeq	3050	chr7	-	63980254	64023505		GCTTATTAAACATAAGGGAATTCATATGGGAGAGAAACCCTACAAATGTGAGGAATGTGG	340252	Hs.520886	GO:0003677|GO:0005634|GO:0005730|GO:0006351|GO:0006355|GO:0008270	zinc finger protein 680 isoform 1	3063.62	354.626	11.516	8.13829	2552.74	4173.16	2464.96	470.578	360.697	232.603	11.3669	11.7154	11.4658	8.55885	8.35045	7.50559
ASHGA5P033967	0.00758344	0.0366083	2.53381	up	protein_coding	ENST00000316757	CCDS12110.1	APBA3	GENCODE	2158	chr19	-	3750770	3761673		TGATGAGTCAAGCCTTCAGGAGCTGGTGCAGCAGTTTGAAGCTCTGCCAGGCGATCTGGT	9546	Hs.465607	GO:0035556|GO:0015031|GO:0001701|GO:0043086|GO:0007268|GO:0010468|GO:0005622|GO:0048471|GO:0016020|GO:0005515|GO:0001540|GO:0019899|GO:0004857	amyloid beta (A4) precursor protein-binding, family A, member 3 [Source:HGNC Symbol;Acc:580]	41.5039	29.0807	5.7249	4.3836	45.0244	37.0559	42.4316	28.9602	32.0068	26.2751	5.93907	5.2525	5.98314	4.30424	4.63499	4.21156
ASHGA5P002281	6.07889e-05	0.00329051	40.2783	up	protein_coding	NM_024713	CCDS10034.1	C15orf29	RefSeq	2750	chr15	-	34432874	34502297	ENST00000562413	AAATTATAAATGATGGAAATATTCAAATTTTAAAACAACAATTAAGTGGATTATGGGAAC	79768	Hs.633566	GO:0005730	uncharacterized protein C15orf29	1426.67	48.4198	10.4563	5.12441	1171.41	1695.46	1413.13	61.9439	50.1471	33.1683	10.3067	10.3592	10.7031	5.46449	5.33027	4.57847
ASHGA5P049039	0.000327167	0.00697246	6.12027	up	protein_coding	ENST00000304926	CCDS10503.1	ZNF434	GENCODE	3027	chr16	-	3432084	3451025		GTTGTTACAGGGACCAGCCATGCGTGACAACAGAGCTGTATCCCTCTGTCAGCAAGAATG	54925	Hs.592078	GO:0006351|GO:0006355|GO:0005634|GO:0005622|GO:0003677|GO:0008270|GO:0003676	zinc finger protein 434 [Source:HGNC Symbol;Acc:20812]	224.41	52.4576	7.90728	5.29368	233.443	210.863	228.923	54.7836	48.0084	54.5808	8.09063	7.45709	8.17411	5.28221	5.26343	5.3354
ASHGA5P012840	0.0163918	0.059594	2.45914	up	protein_coding	NM_001135565	CCDS48076.1	HDHD1	RefSeq	2224	chrX	-	6966960	7066231	ENST00000381077, NM_001178136	TCTCCCCCTCCTGCTATGGAGAAGTGCCTTGTCTTTGAAGATGCTCCCAATGGGGTGGAG	8226	Hs.185910	GO:0003674|GO:0005575|GO:0008150|GO:0009117|GO:0016791|GO:0046872	pseudouridine-5'-monophosphatase isoform a	24175.9	11043.9	14.534	13.2358	26312.9	33154.9	13059.8	12143.6	10906.5	10081.7	14.7524	14.9469	13.9026	13.3411	13.231	13.1354
ASHGA5P011020	0.00227917	0.018572	2.09055	up	protein_coding	NM_001167880	CCDS53587.1	LHPP	RefSeq	1611	chr10	+	126150340	126302710		ATAGGAGTGGAAGCCCACCAGGCCCAGTGACGAGCACCATCCGGAAGTGAAGGCTGATGG	64077	Hs.527748	GO:0000287|GO:0004427|GO:0005634|GO:0005730|GO:0005737|GO:0005829|GO:0006470|GO:0006796|GO:0008969|GO:0042803	phospholysine phosphohistidine inorganic pyrophosphate phosphatase isoform 2	72.834	55.9486	6.44045	5.37657	74.5348	85.7649	58.2022	55.155	46.3765	66.3142	6.60606	6.32281	6.39248	5.2913	5.21059	5.6278
ASHGA5P001101	0.000358279	0.0072767	2.78392	up	protein_coding	NM_080838	CCDS6372.1	WISP1	RefSeq	4933	chr8	+	134203281	134243932		AATAGGAGTGTGTGCACATGCTGTGGGTGAGGTGGAGGCATGGCACAGGAACTGCATAGC	8840	Hs.492974	GO:0001558|GO:0005520|GO:0005615|GO:0005737|GO:0007155|GO:0007165|GO:0007267|GO:0016055	WNT1-inducible-signaling pathway protein 1 isoform 2 precursor	27.0261	18.5282	5.15466	3.67754	26.7263	32.2124	22.1397	16.8992	18.1971	20.4884	5.25998	5.07145	5.13255	3.4436	3.75432	3.83471
ASHGA5P017581	5.60229e-05	0.00319434	5.20472	up	protein_coding	NM_001002020	CCDS31928.1	PUS1	RefSeq	1666	chr12	+	132413744	132428406		GGGGCGGGAGCTCGCCGCGCATGGCCGGGAACGCGGAGCCGCCGCCCGCCGGAGCCGCAT	80324	Hs.592004	GO:0003677|GO:0003723|GO:0004730|GO:0005634|GO:0005667|GO:0005730|GO:0005739|GO:0008033|GO:0009982|GO:0030374|GO:0031119|GO:0045944	tRNA pseudouridine synthase A, mitochondrial isoform 2	222.12	60.6294	7.89137	5.51154	230.872	248.254	187.233	65.8114	59.6921	56.3846	8.07776	7.68058	7.91575	5.55611	5.59451	5.38402
ASHGA5P014119	0.031009	0.0913562	2.08664	up	protein_coding	ENST00000435606	CCDS45834.1	C18orf1	GENCODE	8032	chr18	+	13620866	13652753	ENST00000399847, ENST00000399848	GCTGCCGCAGATCATGCATGCCCCGCGGTCCAGGGACAGGTTCACAGCGCCGTCCTTCAT	753	Hs.731853	GO:0008150|GO:0016021|GO:0005886|GO:0003674	chromosome 18 open reading frame 1 [Source:HGNC Symbol;Acc:1224]	19.6622	18.701	4.73293	3.67174	16.817	17.828	24.3415	23.8986	15.0304	17.1742	4.64771	4.29743	5.25365	3.99977	3.45602	3.55944
ASHGA5P008501	0.000894291	0.0114071	3.1778	up	protein_coding	NM_001025097	CCDS45843.1	PSMA8	RefSeq	1713	chr18	+	23713815	23773319		GGAATTCGAGGACTTACTGCTGATGCTAGAGTAGTAATAAACAGAGCCCGTGTGGAGTGC	143471	Hs.464813	GO:0000075|GO:0000084|GO:0000209|GO:0000216|GO:0000278|GO:0002474|GO:0002479|GO:0004298|GO:0005634|GO:0005829|GO:0006521|GO:0006915|GO:0006977|GO:0010467|GO:0016032|GO:0016070|GO:0016071|GO:0019773|GO:0031145|GO:0034641|GO:0042590|GO:0042981|GO:0044281|GO:0051437|GO:0051439	proteasome subunit alpha type-7-like isoform 3	98.6899	47.9324	6.8192	5.15117	72.6577	126.326	97.0856	54.2282	48.6312	40.9379	6.57503	6.81317	7.0694	5.2646	5.28271	4.90621
ASHGA5P006522	0.000114134	0.00439983	3.75281	up	protein_coding	NM_153636	CCDS10981.1	CPNE7	RefSeq	2449	chr16	+	89642175	89663654		ACCCTGGGGCAGATTGTGGCCCAGAAGAAGGTGACCCGCCCGCTGCTGCTCAAGTTTGGC	27132	Hs.461775	GO:0005215|GO:0006629|GO:0006810	copine-7 isoform a	563.985	187.682	9.14502	7.23705	547.635	614.085	530.236	195.97	176.648	190.428	9.23044	8.89841	9.30621	7.22206	7.27798	7.2111
ASHGA5P012332	7.89923e-05	0.00380183	4.95745	up	protein_coding	NM_015104	CCDS31602.1	ATG2A	RefSeq	6378	chr11	-	64662003	64684722		CGGCCAGAAGCTCTCGGAGAGTCCTGCCTCTCTGCCCTCGTGCCCCCCAGTGGAGACGGC	23130	Hs.370671	GO:0005515	autophagy-related protein 2 homolog A	17497.8	4198.28	14.1284	11.8188	16975.2	18946.1	16572	4280.44	3460.03	4854.36	14.1037	14.0366	14.2447	11.8023	11.6095	12.0444
ASHGA5P014103	0.000552825	0.00902808	5.147	up	protein_coding	ENST00000399668	CCDS42024.1	CASC5	GENCODE	7607	chr15	+	40886446	40954881		AATAGTGAGAAAGTCAGAAATGGAAGAAACAGAAACAGGAGAAAATCTTCTTTTGATACA	57082	Hs.181855	GO:0051301|GO:0000278|GO:0006334|GO:0010923|GO:0071173|GO:0000087|GO:0001675|GO:0000236|GO:0008608|GO:0034080|GO:0005634|GO:0005829|GO:0005654|GO:0000777|GO:0001669|GO:0005515	cancer susceptibility candidate 5 [Source:HGNC Symbol;Acc:24054]	22.9271	7.03035	4.94921	2.58548	20.9685	22.503	25.3098	5.37466	9.61056	6.10582	4.93865	4.60095	5.30805	2.43545	2.81617	2.50482
ASHGA5P029268	0.000970045	0.011821	2.58683	up	protein_coding	NM_015859	CCDS9873.1	GTF2A1	RefSeq	6336	chr14	-	81641795	81687296	NR_048573	TTATCTTGTTTTCTTGGGGTTGCCCCCTCTTGTTTGTGTTGTGTGTGGAAATGGCGAACT	2957	Hs.592334	GO:0003677|GO:0003713|GO:0005515|GO:0005654|GO:0005672|GO:0006355|GO:0006366|GO:0006366|GO:0006367|GO:0006368|GO:0008134|GO:0010467|GO:0016032|GO:0017025|GO:0046982	transcription initiation factor IIA subunit 1 isoform 1	1098.34	499.761	10.0903	8.71916	974.004	1201.94	1119.08	536.595	465.983	496.704	10.0292	9.85513	10.3867	8.75367	8.72495	8.67885
ASHGA5P014602	0.022257	0.0729964	2.49672	up	protein_coding	NM_001145298	CCDS45781.1	EXOC7	RefSeq	4775	chr17	-	74077085	74099868		AGTCAAGCGGCCAGGTCACGAGCATGATTTCCGAGTTAAGCACCTGTCCGAGGCCTTGAA	23265	Hs.514496	GO:0000145|GO:0005515|GO:0005815|GO:0005829|GO:0005886|GO:0006887|GO:0015031|GO:0032584|GO:0034451	exocyst complex component 7 isoform 5	12.8089	10.1992	4.15181	2.83177	9.6953	12.6611	16.0703	13.2191	5	12.3785	3.90932	3.85228	4.69381	3.07773	2.34646	3.07112
ASHGA5P017887	0.011663	0.0478158	2.10691	up	protein_coding	NM_009588	CCDS4704.1	LTB	RefSeq	848	chr6	-	31548335	31550202	NM_002341	AGGGAGGACTGGGTTTCAGAAGCTGCCAGAGGAGGAGCCAGAAACAGATCTCAGCCCCGG	4050	Hs.376208	GO:0005102|GO:0005125|GO:0005164|GO:0005575|GO:0005615|GO:0006955|GO:0007165|GO:0007267|GO:0010467|GO:0016021|GO:0043588|GO:0045084|GO:0048535	lymphotoxin-beta isoform b	24.5427	21.4075	4.95565	3.88052	17.2054	37.4894	18.9334	27.6898	17.9229	18.6098	4.67915	5.26798	4.91981	4.22838	3.72822	3.68496
ASHGA5P013100	0.0242849	0.0773924	2.1507	up	protein_coding	NM_173676	CCDS34438.1	PNPLA1	RefSeq	2367	chr6	+	36210944	36276372	ENST00000394571	CCGCGGTGTGAGGTACATCGATGGGGGCTTCACGGGCATGCAGCCCTGTGCCTTCTGGAC	285848	Hs.407002	GO:0016042|GO:0016787	patatin-like phospholipase domain-containing protein 1 isoform 1	11.3645	10.7894	3.99616	2.89135	8.19303	12.3987	13.5018	15.0305	7.38379	9.95382	3.68853	3.82494	4.475	3.27784	2.62307	2.77314
ASHGA5P018513	1.09093e-05	0.00216313	4.83098	up	protein_coding	NM_001127691	CCDS53285.1	RHD	RefSeq	2545	chr1	+	25598980	25656936		GTACCTGCCGTTTCCTCATTTGGCTGTTGGATTTTAAGCAAAAGCATCCAAGAAAAACAA	6007	Hs.449968	GO:0005887|GO:0008519	blood group Rh(D) polypeptide isoform 2	1204.16	300.667	10.2256	7.95325	1204	1389.56	1018.91	315.743	290.614	295.643	10.3459	10.096	10.2348	7.95223	8.02664	7.88088
ASHGA5P015013	0.044417	0.116078	2.01394	up	protein_coding	NM_001020825	CCDS47298.1	NR3C1	RefSeq	4154	chr5	-	142657495	142783254		CTTGGATTCTATGCATGAAAATGTTATGTGGTTAAAACCAGAAAGCACATCTCACACATT	2908	Hs.122926	GO:0003682|GO:0003690|GO:0003700|GO:0004883|GO:0005496|GO:0005515|GO:0005634|GO:0005654|GO:0005730|GO:0005737|GO:0005759|GO:0005829|GO:0006111|GO:0006351|GO:0006366|GO:0006367|GO:0007165|GO:0007420|GO:0007568|GO:0007623|GO:0008211|GO:0008270|GO:0009314|GO:0010467|GO:0014049|GO:0014069|GO:0014823|GO:0014889|GO:0016020|GO:0030324|GO:0030325|GO:0030512|GO:0030544|GO:0030971|GO:0031946|GO:0032868|GO:…	glucocorticoid receptor isoform beta	144.425	96.7179	7.19343	6.18341	87.9654	245.576	99.7324	129.393	89.3758	71.3849	6.8128	7.6668	7.10069	6.58051	6.22684	5.74287
ASHGA5P002664	0.010872	0.0460101	2.40783	up	protein_coding	NM_000750	CCDS10306.1	CHRNB4	RefSeq	2448	chr15	-	78916635	78933587		TGAAGACCAGAGTGTCGTTGAGGACTGGAAGTACGTGGCTATGGTGGTGGACCGGCTGTT	1143	Hs.624178	GO:0001508|GO:0004889|GO:0005886|GO:0005887|GO:0005892|GO:0005892|GO:0006811|GO:0006939|GO:0006940|GO:0007165|GO:0007268|GO:0007271|GO:0007626|GO:0015276|GO:0015464|GO:0016021|GO:0030054|GO:0035095|GO:0042166|GO:0045211|GO:0046928|GO:0060084	neuronal acetylcholine receptor subunit beta-4 isoform 1 precursor	29.4202	22.0736	5.19053	3.92279	29.4951	41.667	17.0986	28.9888	17.4332	19.7988	5.38387	5.40783	4.77989	4.30547	3.68366	3.77926
ASHGA5P055582	2.25578e-05	0.00251764	2.91289	up	protein_coding	NM_213611	CCDS9065.1	SLC25A3	RefSeq	1919	chr12	+	98987402	98995778		TGTCCTCTAACCGTCGCTCCCTCCTCCCCTAGAAAGATGTTCTCGTCCGTGGCGCACCTG	5250	Hs.290404	GO:0005739|GO:0005743|GO:0005887|GO:0006091|GO:0006810|GO:0015293|GO:0015320	phosphate carrier protein, mitochondrial isoform b precursor	46758.2	20077	15.6554	14.113	50288.2	51100.2	38886.3	21694.3	20251.2	18285.4	15.7359	15.649	15.5814	14.1983	14.1199	14.0206
ASHGA5P013453	0.00284832	0.0211447	3.12917	up	protein_coding	ENST00000393872	CCDS14713.1	MAGEA2	GENCODE	1965	chrX	-	151918387	151922364		AGGAGGCAAGGGAACTCTGGCGTAAGAGCTTTGTGTGACCAGGGCAGGGCTGGTTAGAAG	4101	Hs.713061	GO:0006351|GO:0000122|GO:0051443|GO:0044257|GO:0072331|GO:0005634|GO:0005515|GO:0031625|GO:0042826|GO:0070491	melanoma antigen family A, 2 [Source:HGNC Symbol;Acc:6800]	32.836	19.5636	5.4112	3.76543	27.28	31.7819	39.446	20.8475	17.5336	20.3098	5.28739	5.05465	5.89157	3.78118	3.69406	3.82104
ASHGA5P034146	0.00737342	0.0360415	2.51474	up	protein_coding	NM_004364	CCDS54243.1	CEBPA	RefSeq	2591	chr19	-	33790839	33793430		GGAGCCCCGCGAGGAGGATGAAGCCAAGCAGCTGGCGCTGGCCGGCCTCTTCCCTTACCA	1050	Hs.740432	GO:0000050|GO:0000122|GO:0001889|GO:0001892|GO:0003677|GO:0003700|GO:0003705|GO:0005515|GO:0005634|GO:0006091|GO:0006351|GO:0006351|GO:0006366|GO:0006953|GO:0007005|GO:0008134|GO:0008203|GO:0008285|GO:0016363|GO:0019048|GO:0019221|GO:0019904|GO:0030099|GO:0030225|GO:0030324|GO:0031100|GO:0032403|GO:0033274|GO:0035189|GO:0042803|GO:0043565|GO:0044212|GO:0045600|GO:0045669|GO:0045944|GO:0045945|GO:…	CCAAT/enhancer-binding protein alpha	18.4946	15.06	4.66673	3.33632	19.2917	18.5197	17.6725	18.7087	15.3434	11.1278	4.82657	4.34832	4.8253	3.60507	3.48533	2.91856
ASHGA5P050171	0.000347842	0.00719318	3.00682	up	protein_coding	NM_024321	CCDS12468.1	RBM42	RefSeq	1669	chr19	+	36119979	36128587		TCCTCTGCAGCAGCCGGCCCCCGCCCTATGGCCCTACGGCCCCCTCACCAGGCCCTCGTG	79171	Hs.5086	GO:0000166|GO:0003723|GO:0005634|GO:0005737	RNA-binding protein 42	3204.35	1218.38	11.6094	10.0212	3200.83	3302.17	3110.05	1241.42	1167.21	1246.5	11.6799	11.3409	11.8074	9.99367	10.0556	10.0143
ASHGA5P052962	0.00927351	0.0416641	2.07916	up	protein_coding	NM_000535	CCDS5343.1	PMS2	RefSeq	2851	chr7	-	6012869	6048737	NR_003085	TATCATTTCAGCAGGCATCCGTGTAAGTTGCACCAATCAGCTTGGACAAGGAAAACGACA	5395	Hs.632637	GO:0003677|GO:0003697|GO:0004519|GO:0005515|GO:0005524|GO:0005634|GO:0006200|GO:0006298|GO:0007131|GO:0016446|GO:0016887|GO:0032138|GO:0032300|GO:0032389|GO:0032407	mismatch repair endonuclease PMS2 isoform a	18.5085	17.0009	4.59109	3.53509	12.0102	26.7996	16.7157	19.9834	14.1333	16.8862	4.19359	4.83454	4.74515	3.71065	3.36072	3.5339
ASHGA5P002658	0.00215871	0.0180115	2.27201	up	protein_coding	NM_004658	CCDS9165.1	RASAL1	RefSeq	3841	chr12	-	113536623	113574044	NM_001193520	AAGAGTCCTGAGTGGCAGATGTGTCACTCCATCCCCGTGTCTCACATCCGCGCCGTGGAG	8437	Hs.528693	GO:0005099|GO:0005543|GO:0005737|GO:0007165|GO:0031235|GO:0032320|GO:0035556|GO:0046580|GO:0046872	rasGAP-activating-like protein 1 isoform 2	277.512	163.31	8.19787	7.0139	276.131	300.58	255.826	190.313	155.102	144.516	8.32167	7.94941	8.32253	7.17771	7.06874	6.79525
ASHGA5P049860	5.54425e-06	0.00180355	2.38747	up	protein_coding	NM_198955	CCDS45788.1	MGAT5B	RefSeq	4068	chr17	+	74868728	74946471		GTCTGGAGCTCAGCCCCCATCCTTTCATTCTCCCTTGCTTCCTTCACTCATGCACTCATT	146664	Hs.144531	GO:0000139|GO:0006487|GO:0016021|GO:0030144|GO:0046872	alpha-1,6-mannosylglycoprotein 6-beta-N-acetylglucosaminyltransferase B isoform 2	3835.5	1850.15	11.8697	10.6143	3622.55	4692.53	3191.43	2032.53	1664.91	1853.01	11.8753	11.8889	11.845	10.6863	10.5654	10.5911
ASHGA5P029837	0.000159008	0.00507901	4.64649	up	protein_coding	ENST00000451127	CCDS53916.1	TEX22	GENCODE	2571	chr14	+	105864919	105880196		CTGGCCACGCTGGGCGGCCGGGAGAGGCCGGGCGCCGCCGGGACCCAGCTGCACTGCAGG	647310	Hs.729499	GO:0001669|GO:0005737	testis expressed 22 [Source:HGNC Symbol;Acc:40026]	18.9375	5.73012	4.66038	2.44424	21.0097	22.8852	12.9177	6.25284	5	5.93752	4.94133	4.62385	4.41597	2.49374	2.34646	2.49252
ASHGA5P041538	0.000339442	0.00707362	3.39209	up	protein_coding	NM_002520	CCDS4376.1	NPM1	RefSeq	1449	chr5	+	170814707	170837888	NM_001037738, NM_199185	CGGCTACGGTACGGGGGTGGGAGGGCTTCGGAGCACGCGCGCGGAGGCGGGACTTGGGAA	4869	Hs.557550	GO:0003713|GO:0003723|GO:0005515|GO:0005634|GO:0005634|GO:0005654|GO:0005654|GO:0005730|GO:0005737|GO:0005737|GO:0005813|GO:0005813|GO:0006281|GO:0006334|GO:0006334|GO:0006886|GO:0006913|GO:0006913|GO:0006950|GO:0007098|GO:0007098|GO:0007165|GO:0007569|GO:0007569|GO:0008104|GO:0008285|GO:0008285|GO:0010826|GO:0019048|GO:0019901|GO:0030529|GO:0030957|GO:0031616|GO:0032071|GO:0034080|GO:0042255|GO:…	nucleophosmin isoform 1	31.1443	17.5907	5.34551	3.58333	31.412	35.7347	26.2861	19.4129	13.7295	19.6296	5.46551	5.20674	5.36426	3.66468	3.31927	3.76604
ASHGA5P004445	0.00479219	0.0278985	2.01234	up	protein_coding	NM_022963	CCDS4411.1	FGFR4	RefSeq	2807	chr5	+	176516550	176525126		GTGCTGCCAGGTACTGGGCGCATCCCCCACCTCACATGTGACAGCCTGACTCCAGCAGGC	2264	Hs.165950	GO:0004713|GO:0005007|GO:0005007|GO:0005524|GO:0005576|GO:0005634|GO:0005730|GO:0005737|GO:0005768|GO:0005783|GO:0005886|GO:0005887|GO:0005911|GO:0008201|GO:0008284|GO:0008284|GO:0008286|GO:0008543|GO:0008543|GO:0008543|GO:0008543|GO:0010715|GO:0016477|GO:0017134|GO:0017134|GO:0018108|GO:0019216|GO:0042593|GO:0045862|GO:0046777|GO:0048554|GO:0055062|GO:0070374|GO:0070857|GO:2000188|GO:2000573	fibroblast growth factor receptor 4 isoform 2 precursor	449.58	278.499	8.84033	7.83146	480.014	451.869	416.858	298.971	263.155	273.372	9.04929	8.49507	8.97664	7.86429	7.87558	7.7545
ASHGA5P034685	0.0221276	0.0727327	2.07722	up	protein_coding	NM_002517	CCDS12694.1	NPAS1	RefSeq	2066	chr19	+	47524142	47549017		AACCAGGAAGGAAAATTCCTCTACATCTCAGAGACAGTCTCCATCTATCTGGGTCTCTCA	4861	Hs.79564	GO:0000122|GO:0003677|GO:0003700|GO:0004871|GO:0005634|GO:0006351|GO:0007417|GO:0007610|GO:0046983	neuronal PAS domain-containing protein 1	80.1842	61.8817	6.58002	5.52537	91.9349	72.1419	76.4758	76.1959	58.93	50.5191	6.87376	6.10623	6.76008	5.7825	5.57521	5.21839
ASHGA5P001914	0.016579	0.0601028	2.99331	up	protein_coding	ENST00000249041	CCDS13958.1	GALR3	GENCODE	1157	chr22	+	38219388	38221502		TCTCCGTGGACAGGTACCTGGCCGTGCGGCACCCGCTGCGCTCGCGCGCCCTGCGCACGC	8484	Hs.158353	GO:0007186|GO:0007218|GO:0007194|GO:0007268|GO:0007631|GO:0007611|GO:0016021|GO:0005886|GO:0004966	galanin receptor 3 [Source:HGNC Symbol;Acc:4134]	22.4477	15.2397	4.89383	3.31209	15.7885	25.0964	26.4584	22.5791	12.679	10.461	4.55931	4.75139	5.37077	3.90666	3.19356	2.83604
ASHGA5P004127	0.0110885	0.0465021	2.93861	up	protein_coding	NM_004202	CCDS14786.1	TMSB4Y	RefSeq	1702	chrY	+	15815446	15817902		TGTCTTCCAAAGAAACTATCGAACAGGAGAGGCAAGCAGGCGAATCTTAAACAGGCATGT	9087	Hs.159201	GO:0003779|GO:0005737|GO:0005856|GO:0008064|GO:0030036|GO:0042989	thymosin beta-4, Y-chromosomal	50793.7	22258	15.7585	14.2033	43604.3	65793.6	42983.1	21260.7	14601.1	30912.2	15.5225	16.024	15.7289	14.1701	13.6731	14.7667
ASHGA5P019227	0.00147052	0.0145866	2.95697	up	protein_coding	NM_001134445	CCDS44170.1	DDAH1	RefSeq	4023	chr1	-	85784167	86044046		TTTATATTAGGTTGACATGATGAAAGAAGCATTAGAAAAACTTCAGCTCAATATAGTAGA	23576	Hs.731520	GO:0000052|GO:0003073|GO:0003824|GO:0005739|GO:0006527|GO:0007263|GO:0016403|GO:0016597|GO:0045429|GO:0045766|GO:0046872	N(G),N(G)-dimethylarginine dimethylaminohydrolase 1 isoform 2	29.1328	18.4556	5.21695	3.65283	21.589	40.5119	25.2974	17.6158	15.2931	22.458	4.97251	5.3709	5.30745	3.50625	3.48268	3.96957
ASHGA5P047704	0.00100372	0.0120432	3.25744	up	protein_coding	NM_016234	CCDS7572.1	ACSL5	RefSeq	3372	chr10	+	114135955	114188138		TCGTGTGGCAGGAAGAACTCAGAGCCGGGAAGCCCCCATTCACTAGAAGCACTGAGAGAT	51703	Hs.11638	GO:0001676|GO:0004467|GO:0004467|GO:0005524|GO:0005739|GO:0005741|GO:0005743|GO:0005783|GO:0005789|GO:0007584|GO:0009744|GO:0009749|GO:0010747|GO:0010867|GO:0015908|GO:0016021|GO:0019432|GO:0032869|GO:0035338|GO:0042981|GO:0044255|GO:0044281|GO:0070723	long-chain-fatty-acid--CoA ligase 5 isoform a	756.854	280.867	9.53504	7.8313	814.336	833.718	622.508	345.789	251.615	245.197	9.77377	9.32375	9.5076	8.09888	7.81062	7.58441
ASHGA5P006532	0.00133704	0.0139728	2.72885	up	protein_coding	NM_003934	CCDS43893.1	FUBP3	RefSeq	3175	chr9	+	133454959	133513739		CAGCAGGTCCCAAGCCAGCAGAGCCAGCCGCAGAGCAGCCAGCCCAACTACAGCAAGGCC	8939	Hs.98751	GO:0003677|GO:0003723|GO:0005634|GO:0005634|GO:0005737|GO:0006351|GO:0010628|GO:0045893	far upstream element-binding protein 3	200.786	100.562	7.71499	6.2667	162.567	294.863	144.929	120.581	97.2827	83.8227	7.62921	7.92399	7.59176	6.47297	6.34744	5.97968
ASHGA5P008390	0.0115115	0.0474018	6.48104	up	protein_coding	NM_006956	CCDS47539.1	ZNF12	RefSeq	4960	chr7	-	6728063	6746566		CCCTGATTGAAGAGAGAGAATATATTAGTAGTGATGGAAGCTATGCAAGAATGAAAGCTG	7559	Hs.431471	GO:0003677|GO:0005634|GO:0006351|GO:0008270|GO:0045892	zinc finger protein 12 isoform b	33.5713	5	5.03955	2.34333	9.87756	68.472	22.3642	5	5	5	3.93399	6.03916	5.14551	2.34074	2.34646	2.34278
ASHGA5P053238	0.00418897	0.0257965	2.57925	up	protein_coding	ENST00000292535	CCDS5721.1	CUX1	GENCODE	13747	chr7	+	101460881	101901513		CCGGGACAGCCCCGGGACTCTGCCAGGTGGATGTTGTGCGTAGCCGGAGCCAGGTTGAAG	1523	Hs.191482	GO:0006351|GO:0007275|GO:0000122|GO:0006355|GO:0030324|GO:0042491|GO:0006357|GO:0000301|GO:0005634|GO:0005737|GO:0000139|GO:0003677|GO:0003700|GO:0043565|GO:0003682|GO:0030674	cut-like homeobox 1 [Source:HGNC Symbol;Acc:2557]	123.332	72.5134	7.14107	5.77412	117.271	133.138	119.587	85.9475	74.7184	56.8745	7.21132	6.87779	7.33409	5.973	5.95198	5.39738
ASHGA5P003760	4.91881e-05	0.00309862	4.91994	up	protein_coding	ENST00000275838	CCDS47749.2	ASB10	GENCODE	1820	chr7	-	150872784	150884478		CCTCCCCAAGAAACATCAGCGTTTCTACTCCTCCCTCTTCGCCTTGGTGAGGCAGCCCAG	136371	Hs.647081	GO:0016567|GO:0035556|GO:0005622|GO:0005515	ankyrin repeat and SOCS box containing 10 [Source:HGNC Symbol;Acc:17185]	4426.27	1019.05	12.0666	9.76793	4724.31	5269.65	3284.86	1104.61	991.983	960.562	12.2585	12.0501	11.8911	9.8237	9.83775	9.64235
ASHGA5P037983	3.05294e-05	0.00269605	3.6878	up	protein_coding	NM_033386	CCDS13961.1	MICALL1	RefSeq	4495	chr22	+	38302154	38338465		ATCACGCTGGTGCAGGCAGAACCAAAGAAGAAGCCAGCCCCACTTCCCCCAAGCAGCAGC	85377	Hs.517610	GO:0005515|GO:0005737|GO:0005856|GO:0008270	MICAL-like protein 1	2369.43	737.711	11.1857	9.30291	2323.49	2635.45	2149.35	751.354	675.415	786.364	11.2501	11.0194	11.2875	9.25863	9.28474	9.36536
ASHGA5P042046	0.00535053	0.0297229	2.04319	up	protein_coding	NM_001145659	CCDS47475.1	CTAGE9	RefSeq	2577	chr6	-	132029580	132032157	NM_001247988, NM_001247989, NM_001247990, NM_005930, NM_198495, NM_203354, NM_203355, NM_203356, NR_027466	CACAGCAAGACACCTGACAATATTGTTGCTTTCTTCAAAAGTAATTTTGACTGATCTCAT	643854	Hs.632613	GO:0016021	cutaneous T-cell lymphoma-associated antigen 9	5546.06	3126.3	12.4118	11.381	5910.28	5670.21	5057.7	3270.36	3462.36	2646.18	12.5653	12.1668	12.5033	11.4069	11.6112	11.1248
ASHGA5P025223	0.0048717	0.028133	5.29455	up	protein_coding	NM_001242313		TMEM191B	RefSeq	1334	chr22	+	20377668	20380440	ENST00000442222, ENST00000445836, NM_001207052	GGAGGACTTGGAGCAGCACAGCAGGCAGCTGCAGGAGCAGTGGGAGGAGCTGTCGAGTCA	728229		GO:0016021	transmembrane protein 191B	47.9268	15.6942	5.79229	3.38778	34.9308	78.5558	30.2937	18.9957	19.6259	8.46089	5.60682	6.213	5.55704	3.63205	3.87192	2.65937
ASHGA5P004672	0.00126745	0.0135861	2.88625	up	protein_coding	ENST00000412055	CCDS43049.1	PRRT3	GENCODE	3761	chr3	-	9987225	9994078		CTGCAGCCAGATGAAGCCGAGGAGTGGCCGGGGCGCCCCCAAAGCCATCCCCCAGCACCC	285368	Hs.598147	GO:0016021	proline-rich transmembrane protein 3 [Source:HGNC Symbol;Acc:26591]	102.442	55.2509	6.90142	5.37223	100.799	101.585	104.941	56.5882	52.3109	56.8535	7.00392	6.53743	7.16292	5.32838	5.39243	5.39586
ASHGA5P004893	0.00143548	0.0144686	2.27305	up	protein_coding	ENST00000370597	CCDS31266.1	CRTAC1	GENCODE	2890	chr10	-	99624756	99790585		GCCTGCGTGGGGACTCTCGGCCAGTCACCGGGCCCCCGCCCCACCACCCCCACCGCTGCT	55118	Hs.500736	GO:0005578|GO:0005509	cartilage acidic protein 1 [Source:HGNC Symbol;Acc:14882]	3318.98	1677.53	11.6609	10.4763	3407.16	3389.49	3160.29	1710.64	1673.25	1648.69	11.7768	11.3767	11.8293	10.4396	10.5743	10.4149
ASHGA5P050454	0.00142643	0.0144344	2.01682	up	protein_coding	ENST00000306078	CCDS1809.1	KCNG3	GENCODE	3824	chr2	-	42669156	42721237		CAACCGCAGCCTGGATGACCGGAGCAGGTACTCCGCCGGCCCTGGGAGGGAGCCCTCCGG	170850	Hs.352633	GO:0055085|GO:0006811|GO:0051260|GO:0007268|GO:0006813|GO:0005886|GO:0005783|GO:0016020|GO:0008076|GO:0005216|GO:0005515|GO:0005249	potassium voltage-gated channel, subfamily G, member 3 [Source:HGNC Symbol;Acc:18306]	118.295	87.5956	7.08711	6.07503	115.733	128.595	110.557	91.9987	78.6562	92.132	7.19393	6.83611	7.23129	6.07273	6.02787	6.12448
ASHGA5P047482	0.000655944	0.00970654	4.9669	up	protein_coding	NM_001171933	CCDS53540.1	CDH23	RefSeq	4341	chr10	+	73555527	73575704	NM_001171935, NM_022124	AAGCTCTTTGCACAGCGGATGGTGCAAAAAGCCTCCTCCTGCCACTCCTCCATCTCTGAG	64072	Hs.656032	GO:0005509|GO:0005515|GO:0005886|GO:0006816|GO:0007156|GO:0007605|GO:0016020|GO:0016021|GO:0016339|GO:0032420|GO:0045494|GO:0050896|GO:0050953|GO:0050957|GO:0051480	cadherin-23 isoform 6	4073.95	942.965	11.9631	9.65074	4576.79	3914.32	3730.73	1039.4	1010	779.494	12.215	11.6021	12.0722	9.73892	9.86178	9.35153
ASHGA5P013570	0.0320806	0.0935549	3.55608	up	protein_coding	NM_001040694	CCDS44624.1	INCENP	RefSeq	4146	chr11	+	61891444	61920635		CAGCTTCGTCGAGAAGGAGCGGCAGCGCCTGGAGAATCTGCGGCGGAAGGAGGAGGCCGA	3619	Hs.142179	GO:0000087|GO:0000236|GO:0000278|GO:0000775|GO:0000776|GO:0000777|GO:0000801|GO:0000910|GO:0005515|GO:0005721|GO:0005819|GO:0005829|GO:0005874|GO:0007059|GO:0030496|GO:0043234	inner centromere protein isoform 1	16.4326	6.63581	4.376	2.54571	25.6527	8.3117	15.3334	6.45606	6.31395	7.1374	5.2056	3.29197	4.63041	2.50664	2.5525	2.57798
ASHGA5P002230	0.00287789	0.0212686	4.75263	up	protein_coding	NM_004585	CCDS41662.1	RARRES3	RefSeq	779	chr11	+	63304272	63313930		GATGGCTTCGCCACACCAAGAGCCCAAACCTGGAGACCTGATTGAGATTTTCCGCCTTGG	5920	Hs.17466	GO:0004623|GO:0006644|GO:0008285|GO:0016042	retinoic acid receptor responder protein 3	250.367	74.8459	7.99403	5.74531	210.898	366.799	173.403	67.4875	48.2667	108.784	7.95292	8.2119	7.81727	5.59506	5.27169	6.36917
ASHGA5P002199	0.00417013	0.0257572	2.36631	up	protein_coding	NM_052970	CCDS13061.1	HSPA12B	RefSeq	3178	chr20	+	3713316	3733758	NM_001197327	CTGTACATCGGCTCCAGCCCGGAGCGGTCCCCAGTGCCTAGCCCACCCGGCTCCCCGAGG	116835	Hs.516854	GO:0005524	heat shock 70 kDa protein 12B isoform 1	698.867	351.951	9.43218	8.18954	746.066	672.234	678.301	381.16	335.117	339.577	9.64398	9.02367	9.6289	8.24038	8.24565	8.0826
ASHGA5P012968	0.000758297	0.0105044	3.33736	up	protein_coding	NM_001079846	CCDS45399.1	CREBBP	RefSeq	10083	chr16	-	3775055	3930121		GCCTGCCAAGCCATCCTGGGGTCTCCAGCTAGTGGAATTCAAAACACAATTGGTTCTGTT	1387	Hs.459759	GO:0000122|GO:0000123|GO:0000790|GO:0000987|GO:0001078|GO:0001085|GO:0001102|GO:0001105|GO:0001191|GO:0001666|GO:0002039|GO:0003700|GO:0003713|GO:0003713|GO:0003713|GO:0004402|GO:0004871|GO:0005515|GO:0005634|GO:0005634|GO:0005654|GO:0005737|GO:0006355|GO:0006355|GO:0006367|GO:0006461|GO:0007165|GO:0007219|GO:0008134|GO:0008270|GO:0008589|GO:0010467|GO:0016407|GO:0016573|GO:0016604|GO:0018076|GO:…	CREB-binding protein isoform b	6788.29	2420.29	12.7253	10.9866	6447.46	7478.5	6438.9	2845.83	2484.24	1930.82	12.7045	12.6067	12.8647	11.1889	11.1268	10.6441
ASHGA5P001089	0.045007	0.117096	2.08011	up	protein_coding	ENST00000220507	CCDS10068.1	RHOV	GENCODE	1705	chr15	-	41164411	41166487		AGCGGGACAGGAGGATTTTGACCGACTTCGTTCCCTTTGCTACCCGGATACCGATGTCTT	171177	Hs.447901	GO:0007264|GO:0051056|GO:0015031|GO:0007165|GO:0006184|GO:0005886|GO:0005622|GO:0005829|GO:0016020|GO:0010008|GO:0005525|GO:0046872|GO:0003924|GO:0005515	ras homolog family member V [Source:HGNC Symbol;Acc:18313]	21.3126	20.1129	4.83546	3.77881	26.9646	16.919	20.0541	25.086	14.6426	20.61	5.27278	4.23115	5.00246	4.075	3.41661	3.8448
ASHGA5P050821	0.00351407	0.0236014	2.57912	up	protein_coding	ENST00000373883	CCDS33385.1	TMEM198	GENCODE	2218	chr2	+	220408744	220415317		TTAACTTGGGAGGGTGACTCCCTTCTATTCCCAGCACTATGCCGGGGACTGTGGCAACAC	130612	Hs.446664	GO:0016021	transmembrane protein 198 [Source:HGNC Symbol;Acc:33704]	38.9417	26.9305	5.59951	4.23264	28.8501	53.9285	34.0465	34.7777	20.8707	25.1431	5.35624	5.73546	5.70683	4.58949	3.96837	4.14004
ASHGA5P045524	0.000556152	0.00904608	2.1449	up	protein_coding	NM_003172	CCDS6966.1	SURF1	RefSeq	1037	chr9	-	136218665	136223361		ATGACTCCTTTCTTCAGTGGGTCCTGCTCCTCATCCCTGTGACTGCCTTTGGCTTGGGGA	6834	Hs.512464	GO:0004129|GO:0005746|GO:0006119|GO:0006754|GO:0008535|GO:0009060|GO:0016021|GO:0055114	surfeit locus protein 1	3431.51	1835.37	11.7098	10.6089	3516.65	3649.83	3128.06	1911.08	1730.34	1864.7	11.8242	11.4907	11.8144	10.6009	10.622	10.6037
ASHGA5P049842	0.000828979	0.0109455	3.2564	up	protein_coding	NM_006937	CCDS45774.1	SUMO2	RefSeq	1066	chr17	-	73163824	73179098	NM_001005849	GGTGGGGGGAGGGAGCGCACGACGTGCGCGCACCCTCTCCCCTCGTCCACCGCTGCCGCC	6613	Hs.546298	GO:0005515|GO:0005634|GO:0016925|GO:0031625|GO:0032436	small ubiquitin-related modifier 2 isoform a precursor	1879.46	672.097	10.8657	9.1624	1925.18	1855.24	1857.97	721.594	600.66	694.038	11.0032	10.4957	11.0981	9.19773	9.11979	9.1697
ASHGA5P054418	1.33977e-05	0.00219336	13.3378	up	protein_coding	NM_183012	CCDS31181.1	CREM	RefSeq	2330	chr10	+	35426709	35501886	NM_181571, NM_183011, NM_183013	TACAAATATCTTAACAATGAGCAAATGTGCAAGGAAAAAATATATTAAGACAAATCCAAG	1390	Hs.200250	GO:0003677|GO:0003700|GO:0005515|GO:0005634|GO:0005667|GO:0006006|GO:0006351|GO:0006355|GO:0006355|GO:0006631|GO:0006687|GO:0007165|GO:0007275|GO:0007283|GO:0008140|GO:0030154|GO:0042752|GO:0043565|GO:0046983|GO:0048384	cAMP-responsive element modulator isoform 20	61.0919	5.08145	6.14657	2.40912	45.1007	92.2443	45.9307	5.14564	5.0987	5	5.94092	6.41548	6.08331	2.42419	2.4604	2.34278
ASHGA5P007437	0.0131095	0.0517153	2.5309	up	protein_coding	NM_003062	CCDS4369.1	SLIT3	RefSeq	5395	chr5	-	168093070	168728133		TGCCAACAAGAGAATCCGTGCCTGGGACAAGTAGTCCGAGAGGTGATCCGCCGCCAGAAA	6586	Hs.604116	GO:0005509|GO:0005615|GO:0005739|GO:0007411|GO:0007411|GO:0008285|GO:0009887|GO:0010629|GO:0021510|GO:0021834|GO:0030308|GO:0032870|GO:0035385|GO:0048495|GO:0048846|GO:0050919|GO:0051414|GO:0061364|GO:0070100	slit homolog 3 protein precursor	30.5381	23.3552	5.3131	3.97345	31.3096	35.3898	24.9149	21.3526	15.8857	32.8273	5.46079	5.19246	5.28605	3.81872	3.54001	4.56162
ASHGA5P053595	0.00370036	0.0242391	4.62353	up	protein_coding	NM_052924	CCDS47927.1	RHPN1	RefSeq	3795	chr8	+	144451024	144466390		GGGTGCGGCGATGATCCTGGAGGAGAGGCCGGACGGCGCGGGCGCCGGCGAGGAGAGCCC	114822	Hs.521912	GO:0005083|GO:0005622|GO:0007165	rhophilin-1	42.2126	16.5796	5.64762	3.43862	30.0173	67.119	29.5016	24.7093	13.1263	11.9033	5.40797	6.01374	5.52115	4.04856	3.2493	3.01801
ASHGA5P049271	3.21768e-05	0.00269605	2.27204	up	protein_coding	NM_001040715	CCDS42177.1	KIAA0895L	RefSeq	3416	chr16	-	67209504	67217883		GTATGATCAGGCACCCCCCAGCCCGCCTACCAGTCCCCCATCCCTGCGCCATAGGCTGAA	653319	Hs.651201		uncharacterized protein KIAA0895-like	13787.9	7053.4	13.7629	12.5789	13850.3	15023.1	12490.4	7523.82	6605.63	7030.76	13.7988	13.665	13.8248	12.6197	12.5236	12.5933
ASHGA5P012103	0.000148567	0.00497164	2.70684	up	protein_coding	ENST00000375741	CCDS45068.1	ARHGEF7	GENCODE	5525	chr13	+	111767623	111947542		GCGGCTGGAGCTCCTGTTTCCTCCTTCCCAGCCTCCTCAGCATCTGGTAACCACCATTCT	8874	Hs.508738	GO:0006915|GO:0007264|GO:0051056|GO:0035023|GO:0035556|GO:0007165|GO:0043065|GO:0007399|GO:0042059|GO:0007173|GO:0008624|GO:0048011|GO:0043547|GO:0005622|GO:0005829|GO:0005938|GO:0043005|GO:0001726|GO:0043025|GO:0043234|GO:0005925|GO:0005515|GO:0005543|GO:0005089|GO:0005085|GO:0019901	Rho guanine nucleotide exchange factor (GEF) 7 [Source:HGNC Symbol;Acc:15607]	5885.76	2528.71	12.5104	11.0738	5955.85	6233.81	5467.62	2635.04	2370.64	2580.46	12.5781	12.3099	12.6433	11.0804	11.0626	11.0784
ASHGA5P008082	0.000624723	0.00951488	4.94628	up	protein_coding	NM_015695	CCDS34437.1	BRPF3	RefSeq	6054	chr6	+	36164549	36200567		TGAACGGAGACTCTGACTACAATGGCTCAGGCAGAAGCCTCCTGCTGCCCTTTGAAGACC	27154	Hs.520096	GO:0002576|GO:0005515|GO:0005576|GO:0005829|GO:0007596|GO:0008270|GO:0030168|GO:0043966|GO:0070776	bromodomain and PHD finger-containing protein 3	771.908	193.014	9.57813	7.27178	827.285	743.576	744.864	217.254	192.647	169.141	9.79385	9.17057	9.76996	7.3803	7.4046	7.03045
ASHGA5P009092	0.0040032	0.0251846	2.08198	up	protein_coding	NM_032459	CCDS9596.1	EFS	RefSeq	2853	chr14	-	23825610	23834842		TGCCACGTCGGTGTATGTGGTGCCGCCCCCAGCTCGGCCCTGTCCAACCTCAGGACCTCC	10278	Hs.24587	GO:0005737|GO:0007155|GO:0017124|GO:0019904|GO:0035556	embryonal Fyn-associated substrate isoform 2	3332.77	1837.25	11.6644	10.6064	3641.48	3350.77	3006.06	1765.12	1909.92	1836.69	11.8859	11.3575	11.7497	10.4833	10.7586	10.5774
ASHGA5P017593	0.00483076	0.0280305	3.37104	up	protein_coding	NM_001114139	CCDS47821.1	EPB49	RefSeq	2553	chr8	+	21912327	21940036		GCTGCAGAAGGCCAAGATGGACAATCAGGTGCTGGGCTACAAGGACCTGGCTGCCATCCC	2039	Hs.106124	GO:0003779|GO:0005634|GO:0005737|GO:0007010|GO:0015629|GO:0016020|GO:0030863|GO:0051017|GO:0051693	dematin isoform 3	36.6799	19.9992	5.55609	3.8029	40.769	29.1969	40.0739	20.0352	19.4685	20.494	5.81121	4.94477	5.91228	3.71504	3.8583	3.83535
ASHGA5P053159	0.000175476	0.00526293	12.2328	up	protein_coding	NM_002069	CCDS5595.1	GNAI1	RefSeq	3318	chr7	+	79764139	79848725		ACCGCAACCTCCGTGAGGACGGCGAGAAGGCGGCGCGCGAGGTCAAGCTGCTGCTGCTCG	2770	Hs.134587	GO:0003924|GO:0003924|GO:0003924|GO:0004871|GO:0005515|GO:0005525|GO:0005634|GO:0005737|GO:0005813|GO:0005834|GO:0005886|GO:0005886|GO:0006184|GO:0006184|GO:0006184|GO:0007049|GO:0007186|GO:0007193|GO:0007268|GO:0007596|GO:0030168|GO:0030496|GO:0031234|GO:0031683|GO:0031821|GO:0043434|GO:0046872|GO:0051301	guanine nucleotide-binding protein G(i) subunit alpha-1 isoform 1	625.207	68.2951	9.2793	5.66662	568.383	623.24	683.998	87.7173	56.6584	60.5096	9.27694	8.91798	9.64298	6.00146	5.51066	5.48773
ASHGA5P013395	6.10704e-06	0.00180355	11.5927	up	protein_coding	NM_017867	CCDS3813.1	C4orf27	RefSeq	1233	chr4	-	170650618	170679093		CTGCAGTCAAATTATTTTTGACGAAAAAACTTAGAGAAATAACGGATAAAAAGAAAATCA	54969	Hs.406756	GO:0005634	UPF0609 protein C4orf27	1937.05	205.637	10.8962	7.36106	1796.88	2403.43	1610.85	244.474	186.98	185.457	10.904	10.8861	10.8986	7.55502	7.36233	7.16583
ASHGA5P046224	9.45025e-05	0.00409258	2.93451	up	protein_coding	ENST00000374519	CCDS14398.1	P2RY4	GENCODE	1639	chrX	-	69478015	69479654		TTCTCGTTGTTTCTGTTCCTTCCTGGGGCCATTGGTCCTACAATCTTCCTGAAAATCTTC	5030	Hs.673854	GO:0007186|GO:0007200|GO:0007204|GO:0030321|GO:0016021|GO:0005886|GO:0016323|GO:0005887|GO:0016324|GO:0005524|GO:0045028|GO:0045030|GO:0015065	pyrimidinergic receptor P2Y, G-protein coupled, 4 [Source:HGNC Symbol;Acc:8542]	947.965	381.889	9.86475	8.31163	914.234	1075.81	853.849	386.631	375.974	383.061	9.93162	9.69369	9.96893	8.2571	8.40657	8.27121
ASHGA5P046670	0.000733136	0.0102861	3.37807	up	protein_coding	NM_001017417	CCDS48174.1	CT45A1	RefSeq	1008	chrX	+	134847184	134856988	NM_001007551, NM_001017435, NM_001017436, NM_001017438, NM_001172288, NM_152582	TGTGGCTGGCTGCTTCCCTTCCTTCCATCCCCTTTGGACCAAACGGGATCGGTGCTTCTG	541466	Hs.460937		cancer/testis antigen family 45 member A1	16755.7	5766.16	14.0284	12.2722	15444.3	22278.7	12544	6505	6055.62	4737.86	13.9635	14.286	13.8359	12.4028	12.4059	12.008
ASHGA5P012577	0.00440439	0.0265492	2.52622	up	protein_coding	ENST00000535316	CCDS53492.1	USP6NL	GENCODE	4739	chr10	-	11502508	11653679		ACAACATTCAGACCCATTTCCAGTCATGAATTCAGACCAGGATGTAGCACTCAAACTTGC	9712	Hs.498661	GO:0008150|GO:0032313|GO:0005575|GO:0005622|GO:0003674|GO:0005097	USP6 N-terminal like [Source:HGNC Symbol;Acc:16858]	91.5765	54.9485	6.67726	5.34028	60.226	134.294	80.209	67.3398	42.9301	54.5757	6.31762	6.89009	6.82407	5.59084	5.0949	5.33509
ASHGA5P045526	0.000307543	0.00679552	2.15236	up	protein_coding	ENST00000339996	CCDS35170.1	TMEM8C	GENCODE	818	chr9	-	136379707	136390068		TGTGCCCTGGCTATGTCCTTTGTTCTGCTGCTGCCCAAGGTCAACAAGAAGGCTGGATCC	389827	Hs.512467	GO:0016021	transmembrane protein 8C [Source:HGNC Symbol;Acc:33778]	1190.55	641.847	10.2003	9.09434	1109.88	1475.36	986.41	717.858	628.41	579.273	10.2263	10.1862	10.1882	9.19032	9.18595	8.90674
ASHGA5P048980	1.84687e-06	0.00127712	9.48591	up	protein_coding	NM_012217	CCDS10432.1	TPSD1	RefSeq	855	chr16	+	1306272	1308494		TGCTCCCCAGATGCTGAGCCTGCTGCTGCTGGCGCTGCCCGTCCTGGCGAGCCCGGCCTA	23430	Hs.677789	GO:0004252|GO:0005576|GO:0006508|GO:0008236	tryptase delta precursor	3890.22	480.064	11.9047	8.65887	3921.29	4285.87	3463.49	502.064	443.62	494.509	12.0003	11.7539	11.9597	8.65465	8.65108	8.67089
ASHGA5P051011	0.00216784	0.0180607	3.65709	up	protein_coding	NM_033421	CCDS13377.1	SNX21	RefSeq	3173	chr20	+	44462469	44471914	NM_001042632, NM_001042633	CCTTTCTGGAGGCCCATGTCCGGCTCTCCTGGCGCCTGGGCCTGGACAAACGTCAATCAG	90203	Hs.472854	GO:0007154|GO:0015031|GO:0030659|GO:0035091	sorting nexin-21 isoform a	958.104	315.898	9.88971	8.01902	1020.46	918.795	935.055	317.87	353.999	275.823	10.0997	9.46622	10.1032	7.96503	8.32222	7.76981
ASHGA5P018816	0.00915029	0.0413245	5.37622	up	protein_coding	NM_001190879	CCDS2187.1	ORC4	RefSeq	6710	chr2	-	148687965	148778316		CTAGAGAAGAAAACAGCATTACCATGGATTTGAATTTGTTGAAATGAGCAGTCGTAAATC	5000	Hs.558364	GO:0000075|GO:0000082|GO:0000084|GO:0000166|GO:0000216|GO:0000278|GO:0000808|GO:0003688|GO:0005515|GO:0005524|GO:0005634|GO:0005654|GO:0005664|GO:0006260|GO:0006270|GO:0017111	origin recognition complex subunit 4 isoform 1	121.772	34.3395	6.98067	4.55408	61.5608	190.489	113.268	43.6009	40.0532	19.3645	6.34919	7.32992	7.26292	4.93187	4.98536	3.74501
ASHGA5P055128	3.17252e-05	0.00269605	4.62667	up	protein_coding	NM_207645	CCDS31672.1	C11orf87	RefSeq	5937	chr11	+	109292845	109299893		GTACTGTCCTGATCGTCTAGCCCCTCTCGTTCCCCGTCCTCGTTTCCAGCATCTTTGCCA	399947	Hs.172982	GO:0016021	uncharacterized protein C11orf87 precursor	6917.39	1761.03	12.751	10.541	6642.44	8125.16	5984.57	1942.42	1792.95	1547.71	12.7421	12.7537	12.7572	10.6246	10.6686	10.33
ASHGA5P001660	0.00751727	0.0364397	2.23027	up	protein_coding	NM_003947	CCDS3027.1	KALRN	RefSeq	6524	chr3	+	123813557	124238698		ACAGTGACAAGGATGGCAACCTTGTTCCTCGGTGGCACCTGGGACCTGGAGATCCTTTCT	8997	Hs.8004	GO:0004674|GO:0005085|GO:0005089|GO:0005524|GO:0005543|GO:0005829|GO:0006468|GO:0006915|GO:0007165|GO:0007264|GO:0007399|GO:0008624|GO:0015629|GO:0016192|GO:0035023|GO:0035556|GO:0046872|GO:0048011|GO:0051056	kalirin isoform 2	30.4423	25.0347	5.27922	4.12201	25.189	42.1443	23.9936	20.6652	22.4389	31.9999	5.17895	5.4234	5.23531	3.76496	4.07911	4.52195
ASHGA5P021219	0.000263761	0.00633319	5.0359	up	protein_coding	NM_019839	CCDS9625.2	LTB4R2	RefSeq	1504	chr14	+	24779356	24781259		TTCTCCAGGCCCCCAATCCTGCTTGCTCCCAGCTTGGCCCAGAAGGATGTCGGTCTGCTA	56413	Hs.642693	GO:0001632|GO:0004974|GO:0005886|GO:0005887|GO:0006935|GO:0007194|GO:0051546	leukotriene B4 receptor 2	5564.84	1270.16	12.4054	10.0731	6611.79	5445.61	4637.13	1410.15	1186.31	1214.01	12.7353	12.098	12.3827	10.1641	10.0778	9.97746
ASHGA5P004114	0.0278513	0.0848815	2.17285	up	protein_coding	NM_145257	CCDS1577.1	CCSAP	RefSeq	5121	chr1	-	229456751	229478688		CGGGAAGGAGGCTGCGGGCAGCGAGGAGCGGCTGGCGCTCGAGGCGGCGGACGGCACCAT	126731	Hs.740385	GO:0005813|GO:0005814|GO:0005819|GO:0005929|GO:0007275|GO:0030424|GO:0035085|GO:0035869|GO:0036064|GO:0045995|GO:0060296	uncharacterized protein C1orf96	132.945	90.4819	7.17224	6.05265	109.809	195.038	93.9892	127.838	83.9254	59.6821	7.12771	7.35617	7.03285	6.55886	6.131	5.46811
ASHGA5P013611	9.71414e-06	0.00202379	2.34941	up	protein_coding	NM_033247	CCDS10256.1	PML	RefSeq	1797	chr15	+	74287013	74328735		CGTTGACCTGCTGCCTCCTCCAGCCCATGCTCTTACAGGCCCTGCACAGAGTAGCACTCA	5371	Hs.526464	GO:0001666|GO:0001932|GO:0002230|GO:0003677|GO:0003713|GO:0005515|GO:0005634|GO:0005654|GO:0005654|GO:0005730|GO:0005730|GO:0005737|GO:0005829|GO:0006351|GO:0006461|GO:0006605|GO:0006605|GO:0006917|GO:0006917|GO:0006919|GO:0006977|GO:0007050|GO:0007050|GO:0007179|GO:0007182|GO:0007184|GO:0007569|GO:0008270|GO:0008270|GO:0008285|GO:0008630|GO:0009411|GO:0009615|GO:0010332|GO:0010522|GO:0016363|GO:…	protein PML isoform 8	9572.85	4680.05	13.2059	11.9736	9072.16	11793	7853.35	5069.81	4496.73	4473.6	13.1825	13.272	13.1631	12.024	11.9718	11.925
ASHGA5P041916	0.00497038	0.0284907	2.25331	up	protein_coding	NM_000863	CCDS4986.1	HTR1B	RefSeq	1173	chr6	-	78171947	78173120		TCCAATGAGGACTTTAAACAAGCATTCCATAAACTGATACGTTTTAAGTGCACAAGTTGA	3351	Hs.123016	GO:0002031|GO:0004993|GO:0005737|GO:0005886|GO:0005887|GO:0007186|GO:0007187|GO:0007205|GO:0007268|GO:0008144|GO:0014059|GO:0030818|GO:0032229|GO:0042220|GO:0042493|GO:0042756|GO:0045471|GO:0046849|GO:0051378|GO:0051385|GO:0051967|GO:0071502	5-hydroxytryptamine receptor 1B	47.6808	36.4667	5.91046	4.73841	47.8739	48.2505	46.9182	33.1733	39.9571	36.2698	6.02487	5.59395	6.11255	4.51701	4.98056	4.71767
ASHGA5P046705	0.01066	0.0454007	2.2343	up	protein_coding	NM_005342	CCDS35428.1	HMGB3	RefSeq	3556	chrX	+	150151762	150159248		GCTGGGGAGCGCTGAGCCGCGCGTCGTGCCCTGCGCTGCCCAGACTAGCGAACAATACAG	3149	Hs.19114	GO:0003690|GO:0005634|GO:0005694|GO:0006310|GO:0007275|GO:0008301	high mobility group protein B3	93.7545	66.6598	6.76119	5.60137	89.5399	116.805	74.919	68.1489	44.8704	86.9602	6.83651	6.71684	6.73023	5.61006	5.15749	6.03656
ASHGA5P014232	0.00418224	0.0257814	2.17041	up	protein_coding	NM_182520	CCDS13814.2	C22orf15	RefSeq	879	chr22	+	24105207	24108050		TCGGATCATCAAGGGAGAGGACATGGCCTCCACCCGCTATGAGTCCCTATTGGAGAACCT	150248	Hs.116254		uncharacterized protein C22orf15	39.9112	32.2532	5.66803	4.55006	33.0522	43.0863	43.5952	32.4825	33.2482	31.0291	5.53275	5.45396	6.01737	4.48331	4.6932	4.47367
ASHGA5P004202	0.000302725	0.0067442	2.6697	up	protein_coding	NM_004874	CCDS6104.1	BAG4	RefSeq	4478	chr8	+	38034105	38070819		AAGCCACCAGGAGCAGCCACCATATCCTAGCTACAATTCTAACTATTGGAATTCTACTGC	9530	Hs.194726	GO:0005057|GO:0005634|GO:0005730|GO:0005737|GO:0005829|GO:0005886|GO:0006457|GO:0010763|GO:0030838|GO:0033138|GO:0045785|GO:0051087|GO:0051496|GO:0051897|GO:0071356|GO:0071364|GO:0072659|GO:0097178|GO:2001145	BAG family molecular chaperone regulator 4 isoform 1	174.057	92.8203	7.56306	6.14638	154	224.57	143.601	113.344	81.8043	83.3124	7.55985	7.54723	7.58209	6.37657	6.09254	5.97004
ASHGA5P005187	0.0013236	0.0139187	3.30622	up	protein_coding	NM_004497	CCDS12677.1	FOXA3	RefSeq	2046	chr19	+	46367517	46377055		GGCGGGCGAGGTCTACTCGCCGGTGACCCCAGTGCCCACCATGGCCCCCCTCAACTCCTA	3171	Hs.36137	GO:0001678|GO:0001678|GO:0003690|GO:0003700|GO:0003700|GO:0003705|GO:0005634|GO:0005667|GO:0007283|GO:0007420|GO:0008134|GO:0008285|GO:0008301|GO:0009267|GO:0009790|GO:0016568|GO:0019904|GO:0021999|GO:0031018|GO:0043565|GO:0044212|GO:0045944|GO:0048665|GO:0051090|GO:0060441|GO:0060487|GO:0070368	hepatocyte nuclear factor 3-gamma	2698.1	925.228	11.3572	9.63202	2861.17	2541.51	2691.63	1021.91	912.769	841.004	11.5141	10.9653	11.5922	9.71577	9.7225	9.45779
ASHGA5P006190	0.00319219	0.0225288	3.56432	up	protein_coding	NM_018397	CCDS2873.1	CHDH	RefSeq	3711	chr3	-	53850323	53880420		TTGTCAACAGAAACTGATATTGAGGATTTCCGTCTGTGTGTGAAGCTCACCAGAGAAATT	55349	Hs.126688	GO:0005743|GO:0008812|GO:0019285|GO:0050660	choline dehydrogenase, mitochondrial	17.4871	9.29309	4.56203	2.7284	12.8223	17.5592	22.0797	11.139	7.8988	8.84149	4.27953	4.27737	5.12919	2.84658	2.65605	2.68258
ASHGA5P009496	0.00437177	0.0264633	2.22752	up	protein_coding	NM_174983	CCDS42465.1	MFSD12	RefSeq	2138	chr19	-	3544196	3557571		CTGCGACGCTGGGACCGTGATGCCCGGCCCTGACTCCTGACAGCCTCCTGCACCTGTGCA	126321	Hs.656901	GO:0006810|GO:0016021	major facilitator superfamily domain-containing protein 12 isoform c	821.099	437.293	9.66104	8.5056	772.939	869.753	820.606	500.729	432.546	378.603	9.6914	9.3813	9.91041	8.65136	8.61188	8.25355
ASHGA5P054926	5.02245e-06	0.00177926	6.9418	up	protein_coding	NM_000738	CCDS8040.1	CHRM1	RefSeq	2863	chr11	-	62676150	62689012		CCAATGCTGATAGTCCCCTCTCCTGCATCCCTCCACCCCAGTCCCCGGGAAAGGCCGGTG	1128	Hs.632119	GO:0004435|GO:0005886|GO:0005887|GO:0006464|GO:0007165|GO:0007186|GO:0007205|GO:0007207|GO:0007213|GO:0007274|GO:0007399|GO:0008144|GO:0008283|GO:0008284|GO:0014069|GO:0016020|GO:0016907|GO:0030054|GO:0032279|GO:0040012|GO:0043270|GO:0043679|GO:0045211	muscarinic acetylcholine receptor M1	78548.9	15155.9	16.5009	13.7056	80022.4	86720.2	68904.1	16570.4	15775.8	13121.6	16.5223	16.5156	16.4648	13.8038	13.7717	13.5412
ASHGA5P011265	1.8944e-05	0.00239404	14.6307	up	protein_coding	NM_022082	CCDS42901.1	SLC17A9	RefSeq	2612	chr20	+	61583998	61599949		AGTGGTCCAGGCCCGAGTGCCAGGCATGGACGGGGACGCTGCTGCTGGGCACATGCCTTC	63910	Hs.512686	GO:0005215|GO:0006887|GO:0016021|GO:0055085	solute carrier family 17 member 9	181.435	19.5243	7.62021	3.74928	146.283	217.832	180.191	23.0458	16.0311	19.496	7.49879	7.50086	7.86097	3.93781	3.55393	3.75609
ASHGA5P022812	0.0110101	0.0463166	2.08395	up	protein_coding	NM_173618	CCDS10665.1	INO80E	RefSeq	1185	chr16	+	30007530	30017112		GAAACTCAAGATGGCGGTGGGACCCCCCGACTGCCCTGTGGGAGGGCCGCTGACCTTCCC	283899	Hs.434864	GO:0005515|GO:0005634|GO:0005730|GO:0006281|GO:0006310|GO:0006351|GO:0006355|GO:0031011	INO80 complex subunit E	293.225	184.876	8.27108	7.21176	312.733	277.861	289.081	187.027	192.782	174.821	8.47908	7.84188	8.49228	7.15063	7.40635	7.07829
ASHGA5P031441	0.000350141	0.00720623	2.75659	up	protein_coding	ENST00000293894	CCDS10428.1	SOX8	GENCODE	3049	chr16	+	1031807	1036979		GTCGCACGTGGAGGACTCGGACTCGGACGCGCCGCCGTCTCCCGCCGGCTCCGAGGGCCT	30812	Hs.243678	GO:0006351|GO:0045893|GO:0043066|GO:0007283|GO:0060612|GO:0045892|GO:0007165|GO:0045944|GO:0008584|GO:0060041|GO:0001701|GO:0045444|GO:0001649|GO:0001755|GO:0007422|GO:0014015|GO:0048484|GO:0048469|GO:0048709|GO:0045165|GO:0045662|GO:0010817|GO:0072034|GO:0090190|GO:0033690|GO:0090184|GO:0060009|GO:0072289|GO:0060018|GO:0046533|GO:0060221|GO:0061138|GO:0072197|GO:0010628|GO:0005634|GO:0005737|GO:…	SRY (sex determining region Y)-box 8 [Source:HGNC Symbol;Acc:11203]	461.903	211.309	8.87295	7.41007	427.309	507.054	451.346	216.259	195.088	222.581	8.89841	8.6394	9.08103	7.37278	7.4228	7.43462
ASHGA5P046274	0.036011	0.101005	2.22099	up	protein_coding	ENST00000302917	CCDS14534.1	TEX13B	GENCODE	1248	chrX	-	107224093	107225600		AGCAGGAGATGGAATGCAATGAGGCGACCTTCCAGTTGCAGCTAACCGAGACCAGCCTTG	56156	Hs.333130		testis expressed 13B [Source:HGNC Symbol;Acc:11736]	11.9582	9.80788	3.93624	2.78504	5.66094	19.1587	11.0549	9.02894	10.454	9.94073	3.2188	4.39313	4.19679	2.66369	2.91914	2.77229
ASHGA5P036771	0.000628889	0.00951488	2.31707	up	protein_coding	NM_014657	CCDS13300.1	TTI1	RefSeq	3931	chr20	-	36611422	36661833		TTTTACGATAAGAGAGCTGCTTCCTTTGTCAGCGTTCTGCATGCTCTGATGGCAGCATTA	9675	Hs.655481	GO:0005515	TELO2-interacting protein 1 homolog	544.564	286.527	9.08983	7.87753	552.341	598.453	482.899	302.427	277.896	279.26	9.23827	8.86392	9.16729	7.88284	7.95957	7.79017
ASHGA5P003008	0.00102539	0.0121002	2.6835	up	protein_coding	NM_002855	CCDS8426.1	PVRL1	RefSeq	5493	chr11	-	119531702	119599435		TGGAGGTCAATATCACAGAATTCCCCTACACCCCGTCTCCTCCCGAACATGGGCGGCGCG	5818	Hs.334846	GO:0002089|GO:0005515|GO:0005576|GO:0005886|GO:0005912|GO:0005913|GO:0006826|GO:0006955|GO:0007155|GO:0007156|GO:0007157|GO:0007411|GO:0015026|GO:0016020|GO:0016021|GO:0016337|GO:0016342|GO:0030246|GO:0030424|GO:0032584|GO:0034329|GO:0034332|GO:0042803|GO:0045202|GO:0045216|GO:0046718|GO:0046790|GO:0046982|GO:0050839|GO:0051963|GO:0060041|GO:0070166	poliovirus receptor-related protein 1 isoform 1 precursor	3460.93	1489.78	11.7262	10.3021	3624.03	3547.29	3211.46	1653.83	1471.65	1343.87	11.8767	11.4479	11.8539	10.3948	10.3917	10.1197
ASHGA5P008337	4.14341e-05	0.00291494	4.33351	up	protein_coding	NM_005090	CCDS32202.1	JMJD7-PLA2G4B	RefSeq	3379	chr15	+	42120282	42140346	NM_001198588	TGAAGAGGCCATGGAGAAGGCAGAGGTGTCCAGGACCTGCCTGCTCACGGTTCGTGTCCT	8681	Hs.198161		JMJD7-PLA2G4B protein isoform a	29.2359	12.782	5.22439	3.10885	26.0597	40.4855	21.1626	14.1251	10.9099	13.311	5.227	5.36997	5.0762	3.1774	2.97215	3.17701
ASHGA5P015599	0.000533298	0.00889909	5.36295	up	protein_coding	NM_016532	CCDS11004.1	INPP5K	RefSeq	3001	chr17	-	1397870	1420182		AGGAGGCTCAGCATACACGTCGTGACTTGGAACGTGGCTTCGGCAGCGCCCCCTCTAGAT	51763	Hs.632238	GO:0001701|GO:0001726|GO:0001933|GO:0004445|GO:0005000|GO:0005515|GO:0005634|GO:0005737|GO:0005783|GO:0005802|GO:0005829|GO:0005829|GO:0005886|GO:0005979|GO:0006469|GO:0006644|GO:0006661|GO:0007186|GO:0010801|GO:0010829|GO:0016020|GO:0016311|GO:0016311|GO:0016312|GO:0030036|GO:0032587|GO:0032869|GO:0032870|GO:0033137|GO:0034485|GO:0034594|GO:0034595|GO:0035305|GO:0035810|GO:0042577|GO:0042593|GO:…	inositol polyphosphate 5-phosphatase K isoform 1	2127.17	466.211	11.031	8.60797	2189.29	2022.81	2169.4	493.815	493.343	411.474	11.1644	10.6287	11.3	8.63286	8.80759	8.38346
ASHGA5P025169	0.000383327	0.00753748	3.13664	up	protein_coding	NM_000802	CCDS8211.1	FOLR1	RefSeq	962	chr11	+	71900958	71907367		TAAACGACAAGGACAGACATGGCTCAGCGGATGACAACACAGCTGCTGCTCCTTCTAGTG	2348	Hs.73769	GO:0004872|GO:0005542|GO:0005576|GO:0005886|GO:0005887|GO:0006898|GO:0008219|GO:0015884|GO:0016020|GO:0031225|GO:0046655	folate receptor alpha precursor	54.2112	29.6184	6.06524	4.41602	45.7573	60.8572	56.019	30.0035	29.5967	29.255	5.96087	5.88884	6.34601	4.36024	4.50911	4.37872
ASHGA5P033370	0.00108118	0.0124477	2.85306	up	protein_coding	NM_001015002	CCDS45776.1	LLGL2	RefSeq	1440	chr17	+	73521782	73560804		TTCGGGAGTGGGTGCCCAGGGTTAGGTGTGGGAGGCATGGGGCAGGACCATCAGTAAAGA	3993	Hs.514477	GO:0005515|GO:0005737|GO:0006887|GO:0007049|GO:0030165|GO:0032878|GO:0043231|GO:0051301	lethal(2) giant larvae protein homolog 2 isoform b	273.433	124.279	8.09928	6.58677	235.641	407.538	177.118	126.574	103.1	143.164	8.10346	8.35319	7.84119	6.54443	6.43609	6.77979
ASHGA5P006246	3.85979e-05	0.00286633	3.14406	up	protein_coding	NM_004217	CCDS11134.1	AURKB	RefSeq	1314	chr17	-	8108048	8113944		CCGACAGACGGCTCCATCTGGCCTGAGCACCCTGCCCCAGCGAGTCCTCCGGAAAGAGCC	9212	Hs.442658	GO:0000087|GO:0000122|GO:0000236|GO:0000278|GO:0000779|GO:0000780|GO:0002903|GO:0004674|GO:0004712|GO:0005515|GO:0005524|GO:0005634|GO:0005819|GO:0005829|GO:0008608|GO:0016570|GO:0030496|GO:0031145|GO:0032133|GO:0032133|GO:0034501|GO:0034644|GO:0036089|GO:0046777|GO:0046872|GO:0051256|GO:0051256|GO:0051983|GO:0071777|GO:0071777	aurora kinase B isoform 1	3079.33	1112.14	11.5411	9.88846	3107.61	3414.72	2715.66	1103.48	1064.94	1168.01	11.6328	11.3891	11.6014	9.82146	9.92678	9.91713
ASHGA5P052632	0.00134551	0.0140134	2.36368	up	protein_coding	NM_025236	CCDS4673.1	RNF39	RefSeq	2170	chr6	-	30038042	30043628		CAAGGGCTGCGTAAGGCTGTGCCCTGCGGGGGCCGTGTGGGCCGTGGAGGGCCGCGGCGG	80352	Hs.121178	GO:0005575|GO:0005737|GO:0008150|GO:0008270	RING finger protein 39 isoform 1	38.0474	28.8187	5.60876	4.36773	32.1607	42.5632	39.4183	32.6084	25.2823	28.5654	5.4995	5.43641	5.89038	4.48934	4.27166	4.34218
ASHGA5P026703	8.25676e-05	0.00383765	2.87902	up	protein_coding	NM_173556	CCDS8271.1	CCDC83	RefSeq	2345	chr11	+	85566143	85631051		TCCTCGTCATCTGCTGCTGCTGCCTTTGGAATCATGTCTAATCTCTGCCAGGCGTTGCTG	220047	Hs.567774		coiled-coil domain-containing protein 83	31819	13502	15.0616	13.5361	29431.7	36052.5	29972.6	14010.6	12601.6	13893.8	14.9339	15.0642	15.1868	13.5458	13.4304	13.632
ASHGA5P006384	0.000923759	0.0115993	3.40675	up	protein_coding	NM_032580	CCDS42258.1	HES7	RefSeq	1684	chr17	-	8023907	8027410		GAGCCCCCGGGGGTTCCCCGGTCCCCAGTCCAGGACGCCGAGGCGCTCGCCAGCTGCTAC	84667	Hs.434828	GO:0000122|GO:0001501|GO:0001756|GO:0003677|GO:0005634|GO:0006351|GO:0007219|GO:0007498|GO:0008134|GO:0046983|GO:0048511	transcription factor HES-7 isoform 2	298.915	119.027	8.29869	6.53029	311.989	289.668	295.086	126.139	106.975	123.966	8.47462	7.89935	8.52209	6.53993	6.49113	6.5598
ASHGA5P003852	3.94079e-05	0.00287704	2.42661	up	protein_coding	NM_000062	CCDS7962.1	SERPING1	RefSeq	1984	chr11	+	57365026	57382326		GAAGTTTGGAGTCCGCTGACGTCGCCGCCCAGATGGCCTCCAGGCTGACCCTGCTGACCC	710	Hs.384598	GO:0001869|GO:0002576|GO:0004867|GO:0005515|GO:0005576|GO:0005576|GO:0005615|GO:0006958|GO:0007596|GO:0007597|GO:0008015|GO:0010951|GO:0030168|GO:0031093|GO:0042730|GO:0045087	plasma protease C1 inhibitor precursor	390.377	203.508	8.63865	7.35971	351.554	488.828	330.75	209.993	201.692	198.838	8.64507	8.598	8.67289	7.33005	7.47745	7.27163
ASHGA5P010147	0.00292996	0.0214449	2.99526	up	protein_coding	NM_001025081	CCDS32847.1	MBP	RefSeq	2300	chr18	-	74690788	74729055	NM_002385	CTCTGGCAAGGTACCCTGGCTAAAGCCGGGCCGGAGCCCTCTGCCCTCTCATGCCCGCAG	4155	Hs.551713	GO:0002020|GO:0005886|GO:0006955|GO:0007268|GO:0007417|GO:0008366|GO:0009636|GO:0019911|GO:0033269|GO:0042552|GO:0043025|GO:0043218|GO:0050771	myelin basic protein isoform 1	1337.11	525.347	10.3789	8.79619	1398.17	1255.33	1357.83	509.517	548.776	517.747	10.5632	9.92627	10.6472	8.67722	8.97044	8.74089
ASHGA5P034572	0.00643562	0.0332473	2.78849	up	protein_coding	NM_194325	CCDS46045.1	ZNF30	RefSeq	2601	chr19	+	35417806	35436076	NM_001099437, NM_001099438, NR_024018	AATATGTGGGTTTGCAGTATCACGGATCAGTGACATTTGAGGATGTGGCCATAGCCTTCT	90075	Hs.657402	GO:0003677|GO:0005634|GO:0006351|GO:0006355|GO:0008270	zinc finger protein 30 isoform b	28.3294	19.3357	5.17467	3.69518	25.7693	39.5997	19.6194	24.91	12.6386	20.4586	5.21225	5.34012	4.97164	4.06528	3.18853	3.83174
ASHGA5P001250	0.000387901	0.0075723	2.40897	up	protein_coding	NM_016016	CCDS11482.1	SLC25A39	RefSeq	1604	chr17	-	42396992	42402217		TATACCAAATGGAAGTGCCTCCTGTATTGCAATGGTGTCCTGGAGCCTCTGTACCTGTGC	51629	Hs.740409	GO:0005743|GO:0006783|GO:0006810|GO:0016021	solute carrier family 25 member 39 isoform b	589.892	297.071	9.2013	7.93289	548.616	656.402	564.656	308.825	270.235	312.152	9.23195	8.98981	9.38216	7.91942	7.9162	7.96305
ASHGA5P009713	0.00467612	0.0274968	2.03889	up	protein_coding	NM_032251	CCDS8072.2	CCDC88B	RefSeq	4932	chr11	+	64107689	64125006		TGGGCATCATTGCCCCCAGCTCCCGAGGGGGACCTCGGATGCTCAGAGGCCTTGACGGAC	283234	Hs.98564	GO:0000226|GO:0005737|GO:0008017	coiled-coil domain-containing protein 88B precursor	24.212	22.6373	5.02531	3.99753	25.3712	24.503	22.7617	22.0833	23.8532	21.9754	5.18909	4.71696	5.1699	3.87333	4.18004	3.93922
ASHGA5P052062	0.000164594	0.00518496	3.89722	up	protein_coding	NM_015312	CCDS43267.1	KIAA1109	RefSeq	15592	chr4	+	123091757	123283914		AAGCTGTATGGTATGAAAGATAGTGCAACATCTCCTCCTTCTCCTCCTTTACCTTCCACT	84162	Hs.408142	GO:0001558|GO:0005515|GO:0005634|GO:0016020|GO:0016021|GO:0030856	uncharacterized protein KIAA1109	9660.42	2879.62	13.2276	11.2651	10405	9467.9	9108.39	3116.47	2850.21	2672.19	13.3526	12.9696	13.3606	11.3211	11.3335	11.1408
ASHGA5P035212	0.040629	0.109298	2.13625	up	protein_coding	NM_001144013	CCDS46379.1	RGPD3	RefSeq	5873	chr2	-	107021135	107084801	ENST00000283195, NM_001037866, NM_001123363, NM_001164463, NM_005054, NM_182588	GTCAACGAGAGGATTCTATTTTGCAAAGCTGTATTATGAAGCTAAAGAATATGATCTTGC	653489	Hs.726367	GO:0000042|GO:0005622	ranBP2-like and GRIP domain-containing protein 3	17.341	16.6219	4.54766	3.45258	14.8817	22.839	14.3022	18.1168	21.7498	9.99905	4.48013	4.62044	4.54241	3.54812	4.03138	2.77824
ASHGA5P002697	6.54507e-05	0.0034164	3.12112	up	protein_coding	NM_002020	CCDS43412.1	FLT4	RefSeq	4534	chr5	-	180034752	180076624	ENST00000261937	ATCCACAAGGGCAGCAGCTGTGACACCGTGGCCGTGAAAATGCTGAAAGAGGGCGCCACG	2324	Hs.646917	GO:0001934|GO:0001938|GO:0001944|GO:0001945|GO:0001946|GO:0001946|GO:0002040|GO:0004714|GO:0005021|GO:0005021|GO:0005515|GO:0005524|GO:0005576|GO:0005634|GO:0005737|GO:0005886|GO:0005886|GO:0005887|GO:0007169|GO:0008284|GO:0008284|GO:0010575|GO:0010595|GO:0018108|GO:0019838|GO:0019903|GO:0030307|GO:0035924|GO:0035924|GO:0043066|GO:0043410|GO:0046330|GO:0046777|GO:0048010|GO:0048010|GO:0048010|GO:…	vascular endothelial growth factor receptor 3 isoform 2 precursor	31.0011	18.6363	5.32799	3.68592	29.9892	37.8924	25.1217	17.9382	17.5113	20.4594	5.40637	5.27981	5.29778	3.53333	3.69248	3.83195
ASHGA5P005754	0.000785134	0.0107045	3.39385	up	protein_coding	NM_017806	CCDS13536.1	LIME1	RefSeq	1206	chr20	+	62367977	62370460		GGCGGAAGCGTCCCTACTGAGGCGGACCCACCTCTGCTCCCTCAGCAAGTCGGACACCAG	54923	Hs.233220	GO:0006357|GO:0014066|GO:0016021|GO:0019815|GO:0019901|GO:0042345|GO:0043122|GO:0043405|GO:0050852|GO:0050853|GO:0051279|GO:0070851	lck-interacting transmembrane adapter 1 precursor	6952.37	2392.12	12.7538	10.9909	7346.54	6638.21	6872.36	2515.22	2480.76	2180.4	12.8777	12.4121	12.9717	11.0142	11.123	10.8355
ASHGA5P040922	0.000325688	0.00696237	3.0323	up	protein_coding	NM_052863	CCDS4456.1	SCGB3A1	RefSeq	517	chr5	-	180017104	180018487		CCCGCGCCATGAAGCTCGCCGCCCTCCTGGGGCTCTGCGTGGCCCTGTCCTGCAGCTCCG	92304	Hs.62492	GO:0005125|GO:0005576|GO:0005615|GO:0030308|GO:0042127	secretoglobin family 3A member 1 precursor	1165.68	458.031	10.1821	8.58164	1175.34	1270.48	1051.22	513.188	436.848	424.058	10.3132	9.9512	10.2818	8.68661	8.62689	8.43142
ASHGA5P011612	0.00029339	0.00664406	2.59411	up	protein_coding	NM_024097	CCDS473.1	C1orf50	RefSeq	1036	chr1	+	43232915	43241413		GGCCAGGGAGGAGCCCTGGTGGAGCTCACCCCGACCCCCGGCGGCCTGGCCCTGGTGAGC	79078	Hs.148845		uncharacterized protein C1orf50	235.748	124.188	7.97463	6.59939	222.327	261.157	223.76	131.852	112.444	128.268	8.02664	7.75371	8.14355	6.61221	6.57117	6.61479
ASHGA5P020769	0.000810737	0.0108175	2.91508	up	protein_coding	ENST00000519574	CCDS46515.1	GPBAR1	GENCODE	1382	chr2	+	219125737	219128582		CAACAGCCATGCATGCCGGCTGCCGCTCCAGGACTCCCCTGTCCCCAGGACCAAGATGAC	151306	Hs.160954	GO:0007186|GO:0016021|GO:0005886|GO:0004930	G protein-coupled bile acid receptor 1 [Source:HGNC Symbol;Acc:19680]	2219.93	875.091	11.0958	9.55224	2299.18	2204.54	2156.08	900.645	813.289	911.339	11.2373	10.7586	11.2914	9.53044	9.55473	9.57157
ASHGA5P050275	0.00257521	0.0199646	2.14642	up	protein_coding	NM_013410	CCDS629.1	AK4	RefSeq	6881	chr1	+	65613849	65697828		AGCGTGGCGCTCAGTCCGCCTGCTACTCGGTCCCGGCGCTGGGCTGAGGGGAGGGGTTGT	205	Hs.10862	GO:0004017|GO:0004017|GO:0005524|GO:0005525|GO:0005739|GO:0005759|GO:0010243|GO:0014070|GO:0046033|GO:0046034|GO:0046039|GO:0046899|GO:0046899	adenylate kinase isoenzyme 4, mitochondrial	111.197	77.3554	6.9751	5.87317	114.756	140.514	78.3192	77.4397	63.9706	90.6559	7.18436	6.94949	6.79144	5.81258	5.70549	6.10143
ASHGA5P008046	0.000928772	0.0116135	4.50119	up	protein_coding	NM_198706	CCDS12145.1	HSD11B1L	RefSeq	1960	chr19	+	5680775	5688534	NM_001267868, NM_198533, NM_198707	TCTCCTGCAGAAGGTGGTAGGGAACTGCCGGAAGCTGGGCGCCCCCAAGGTCTTCTACAT	374875	Hs.631840	GO:0000166|GO:0005576|GO:0016491	hydroxysteroid 11-beta-dehydrogenase 1-like protein isoform b precursor	23.0334	9.40888	4.91208	2.74178	16.4454	31.4187	21.236	12.0667	5	11.1599	4.61647	5.03939	5.0804	2.95448	2.34646	2.92439
ASHGA5P048536	0.00278945	0.0209451	2.22853	up	protein_coding	NM_005432	CCDS9984.1	XRCC3	RefSeq	2620	chr14	-	104163953	104181823	NM_001100118, NM_001100119	TGCTGGCTGACCGGCTCCGCGAGGAAGAGGCTGCCCTCGGCTGCCCAGCCCGGACCCTGC	7517	Hs.733412	GO:0003677|GO:0005515|GO:0005524|GO:0005634|GO:0005737|GO:0005739|GO:0006281|GO:0006310|GO:0006974|GO:0008094|GO:0048471	DNA repair protein XRCC3	72.2895	52.2775	6.43955	5.28346	61.748	81.1883	73.9324	47.979	50.003	58.8506	6.35428	6.25491	6.70945	5.07647	5.32471	5.44919
ASHGA5P051191	6.3586e-06	0.00180802	3.22244	up	protein_coding	NM_016335	CCDS13754.1	PRODH	RefSeq	2423	chr22	-	18900286	18924066		CGGGTACCGCCGTCCCGCCATGGCTCTGAGGCGCGCCCTGCCCGCGCTGCGCCCCTGCAT	5625	Hs.517352	GO:0004657|GO:0005743|GO:0005759|GO:0006537|GO:0006560|GO:0006562|GO:0008631|GO:0010133|GO:0019470|GO:0034641|GO:0044281|GO:0071949	proline dehydrogenase 1, mitochondrial isoform 1	222.817	95.0583	7.88517	6.19702	213.668	274.817	179.965	100.435	84.4113	100.328	7.96969	7.82686	7.85897	6.19911	6.13929	6.25265
ASHGA5P034777	0.00354948	0.0237151	2.58758	up	protein_coding	NM_133272	CCDS12909.1	FCAR	RefSeq	1635	chr19	+	55385548	55401839	NM_002000, NM_133277, NM_133279	TACAACAGGAGCCCCTACCTGTGGTCCTTCCCCAGTAATGCCTTGGAGCTTGTGGTCACA	2204	Hs.659872	GO:0005576|GO:0005886|GO:0005887|GO:0006955|GO:0019862	immunoglobulin alpha Fc receptor isoform d	1141.43	521.815	10.1546	8.78296	1228.67	1093.95	1101.69	566.713	503.826	494.907	10.3829	9.7225	10.3582	8.83607	8.84024	8.67256
ASHGA5P006066	0.000180844	0.00533535	3.54185	up	protein_coding	NM_022762	CCDS4431.1	RMND5B	RefSeq	1825	chr5	+	177558027	177575479		AAGTGAGCAGGCTGAGGCCACCATGGAGCAGTGTGCGTGCGTGGAGAGAGAGCTGGACAA	64777	Hs.27222		protein RMD5 homolog B	64.648	29.8132	6.25051	4.426	47.8219	90.5743	55.5476	29.0194	30.534	29.8861	6.02398	6.3933	6.33424	4.30668	4.56189	4.40945
ASHGA5P004308	0.00191554	0.0167659	5.95861	up	protein_coding	NM_000037	CCDS6121.1	ANK1	RefSeq	8300	chr8	-	41510743	41655140	NM_020478	GCACGAGGAGGTGGAGCTGAGAGGGAGTGGCCTACAGCCGGACCTGATAGAGGGCAGGAA	286	Hs.654438	GO:0005198|GO:0005200|GO:0005515|GO:0005829|GO:0005856|GO:0005886|GO:0005886|GO:0006779|GO:0006887|GO:0006888|GO:0007010|GO:0007165|GO:0007411|GO:0008093|GO:0008093|GO:0014731|GO:0015672|GO:0016323|GO:0016529|GO:0019899|GO:0019899|GO:0030507|GO:0030507|GO:0030507|GO:0030863|GO:0031430|GO:0045199|GO:0048821|GO:0051117|GO:0072661	ankyrin-1 isoform 3	60.7038	17.9742	6.16392	3.58894	43.0066	84.561	54.5439	19.5864	22.7171	11.6191	5.87845	6.30142	6.31189	3.67937	4.10098	2.98647
ASHGA5P008269	9.93756e-05	0.00411127	2.10809	up	protein_coding	NM_015850	CCDS43732.1	FGFR1	RefSeq	5911	chr8	-	38268655	38326352	ENST00000425967, NM_001174063, NM_001174065, NM_023110	CCTGAACAAGCCCAGCCCTGGGGAGCCCCTGTGGAAGTGGAGTCCTTCCTGGTCCACCCC	2260	Hs.264887	GO:0000122|GO:0000165|GO:0001501|GO:0001525|GO:0001657|GO:0001701|GO:0001759|GO:0001764|GO:0001948|GO:0002053|GO:0002062|GO:0004713|GO:0005007|GO:0005007|GO:0005515|GO:0005524|GO:0005576|GO:0005634|GO:0005829|GO:0005886|GO:0005886|GO:0005887|GO:0006351|GO:0006468|GO:0007411|GO:0007605|GO:0008201|GO:0008284|GO:0008284|GO:0008284|GO:0008286|GO:0008543|GO:0008543|GO:0008543|GO:0008543|GO:0010518|GO:…	fibroblast growth factor receptor 1 isoform 2 precursor	715.972	401.048	9.46038	8.38445	671.162	839.815	636.941	431.515	357.46	414.171	9.50653	9.33348	9.54114	8.42359	8.33658	8.39316
ASHGA5P053894	0.0180234	0.0636001	2.82663	up	protein_coding	NM_017723	CCDS7041.1	TOR4A	RefSeq	4069	chr9	+	140172279	140177093		TTCCTGCGACATGGACCGCGGCCAGCCCAGCCTGGAGCCTGCTGCCGCGGCCCCCCGAGC	54863	Hs.495541	GO:0005524|GO:0016021|GO:0017111|GO:0051085	torsin-4A	73.3825	41.6629	6.43641	4.93733	61.9169	59.249	98.9816	42.5794	46.3588	36.0506	6.35853	5.85751	7.09318	4.89356	5.21	4.70843
ASHGA5P040745	0.00389382	0.0247924	2.22494	up	protein_coding	NM_194249	CCDS4236.1	DND1	RefSeq	1681	chr5	-	140050380	140053171		TTATAAAGAGGGTACGAGGGGGCCAGCTGGAGAGCCATGCAGTCCAAGCGGGATTGTGAG	373863	Hs.591262	GO:0000166|GO:0005634|GO:0005737|GO:0007275|GO:0007281|GO:0017091|GO:0035198|GO:0060965	dead end protein homolog 1	31.8947	26.171	5.3629	4.20914	23.9145	39.0016	32.7681	31.2887	22.9194	24.305	5.11199	5.31918	5.65754	4.42551	4.11338	4.08851
ASHGA5P044583	0.000194813	0.00551271	2.23354	up	protein_coding	ENST00000356994	CCDS6412.1	SCRIB	GENCODE	5218	chr8	-	144873089	144897549		AAGTTTGACTACAGGGCCTTTGCGGCCCTGCCTTCTTCCAGACCTGTCTATGACATCCAG	23513	Hs.436329	GO:0008283|GO:0001843|GO:0043065|GO:0016337|GO:0016477|GO:0032863|GO:0050918|GO:0060603|GO:0001921|GO:0060561|GO:0045930|GO:0044419|GO:0035089|GO:0071896|GO:0005886|GO:0045211|GO:0042734|GO:0005911|GO:0031252|GO:0005913|GO:0034750|GO:0005515	scribbled homolog (Drosophila) [Source:HGNC Symbol;Acc:30377]	186.181	116.53	7.66022	6.50089	178.112	217.104	163.327	118.104	109.25	122.237	7.73931	7.49545	7.74591	6.43755	6.52643	6.53869
ASHGA5P047675	0.00113155	0.0127625	2.6464	up	protein_coding	ENST00000373012	CCDS30679.1	POU3F1	GENCODE	2928	chr1	-	38509522	38512450		TTATTTTCTGGATGTGTTTGGAGCTTCCCCCTTCTCCGTTTCTTCTTCTGTTTGTTAAGG	5453	Hs.1837	GO:0006351|GO:0045893|GO:0006355|GO:0030216|GO:0010628|GO:0030900|GO:0022011|GO:0008366|GO:0014044|GO:0008544|GO:0042552|GO:0045944|GO:0005634|GO:0005667|GO:0003677|GO:0003700|GO:0043565|GO:0001105	POU class 3 homeobox 1 [Source:HGNC Symbol;Acc:9214]	4656.35	2047.19	12.1672	10.7632	4700.41	4693.71	4574.93	2211.21	2082.99	1847.37	12.2511	11.8896	12.361	10.8197	10.8828	10.5871
ASHGA5P001233	0.000256574	0.00625138	2.46948	up	protein_coding	ENST00000223862	CCDS6462.1	RLN1	GENCODE	967	chr9	-	5334968	5339873	NM_134441	CCAGTGGCAGAAATTGTACCATCCTTCATCAACAAAGATACAGAAACTATAATTATCATG	6013	Hs.368996	GO:0007165|GO:0007565|GO:0005576|GO:0005179	relaxin 1 [Source:HGNC Symbol;Acc:10026]	106.378	65.4814	6.93668	5.63248	108.707	126.946	83.4794	66.8317	65.8122	63.8004	7.11166	6.8197	6.87869	5.58142	5.74924	5.56677
ASHGA5P054944	8.8271e-06	0.00200086	2.46666	up	protein_coding	NM_004630	CCDS31599.1	SF1	RefSeq	3586	chr11	-	64532075	64546316	NM_001178031	CCGGCATGATGTATGCCCCGCCCCCTCCTCCTCCGCCTCCCATGGACCCTTCTAACTTTG	7536	Hs.502829	GO:0000245|GO:0000389|GO:0000398|GO:0003676|GO:0003714|GO:0003723|GO:0005634|GO:0005634|GO:0005681|GO:0005730|GO:0005840|GO:0006351|GO:0006355|GO:0008270	splicing factor 1 isoform 1	60627.9	31437.6	16.0665	14.7639	61557.6	64136.7	56189.5	32257.1	31081.3	30974.2	16.0788	15.9847	16.136	14.7787	14.7425	14.7706
ASHGA5P004189	8.77514e-05	0.00395422	6.4769	up	protein_coding	NM_032693	CCDS47084.1	NAA11	RefSeq	1549	chr4	-	80238271	80247171		TAGAGCATGCTTAAGCATTTCAGGTCCTCATGTCTCAACCACATCTACTCTGTGAACCCT	84779	Hs.676048	GO:0004596|GO:0005634|GO:0005730|GO:0005737|GO:0005794|GO:0005813	N-alpha-acetyltransferase 11	133.07	32.3911	7.24138	4.54607	134.535	140.955	123.72	37.1839	30.5385	29.4509	7.38448	6.95368	7.38597	4.68684	4.5622	4.38918
ASHGA5P052291	0.000334326	0.00702318	4.78653	up	protein_coding	NM_004472		FOXD1	RefSeq	2272	chr5	-	72742084	72744352		GTCCAGTGTCGAGAACTTTACTGCTAGGATTTCCAATTGTTAATAACGCTATGTTAGCGC	2297	Hs.519385	GO:0001755|GO:0003677|GO:0003690|GO:0003700|GO:0003705|GO:0005634|GO:0005667|GO:0007389|GO:0007422|GO:0008134|GO:0008301|GO:0009790|GO:0010628|GO:0030318|GO:0030513|GO:0030513|GO:0043565|GO:0045892|GO:0045944|GO:0048484|GO:0048485|GO:0048846|GO:0048937|GO:0050935|GO:0051090|GO:0051216|GO:0060678|GO:0060678|GO:0072213|GO:0072267|GO:0090184|GO:0090184	forkhead box protein D1	29.5997	11.9439	5.2727	3.01372	33.8425	31.26	23.6967	11.2661	10.5274	14.038	5.56627	5.03296	5.21886	2.86077	2.92783	3.25256
ASHGA5P001246	0.0248587	0.0785604	2.1487	up	protein_coding	ENST00000225275	CCDS11604.1	MPO	GENCODE	3215	chr17	-	56347216	56358296		AGCAGGACAAATACCGCACCATCACCGGGATGTGCAACAACAGACGCAGCCCCACGCTGG	4353	Hs.458272	GO:0042744|GO:0055114|GO:0032094|GO:0032496|GO:0001878|GO:0002679|GO:0007568|GO:0009612|GO:0044130|GO:0006916|GO:0019430|GO:0006979|GO:0006952|GO:0034374|GO:0050832|GO:0002149|GO:0005634|GO:0005739|GO:0005615|GO:0005764|GO:0005625|GO:0030141|GO:0004601|GO:0020037|GO:0003682|GO:0008201	myeloperoxidase [Source:HGNC Symbol;Acc:7218]	17.4439	16.9699	4.58842	3.48496	17.4449	18.8332	16.0538	21.0485	10.23	19.6312	4.70011	4.37275	4.6924	3.79565	2.89302	3.7662
ASHGA5P026346	0.00165119	0.0154135	2.15998	up	protein_coding	NM_021117	CCDS7915.2	CRY2	RefSeq	4204	chr11	+	45868956	45904799		TGGGCGGGCTATGGGCGGGGTCCACGTCGCCTACCGGGGCGGAGCGGGGGTGGCTGGAGC	1408	Hs.532491	GO:0000122|GO:0000166|GO:0000719|GO:0000988|GO:0003677|GO:0003684|GO:0003697|GO:0003904|GO:0003914|GO:0005515|GO:0005576|GO:0005634|GO:0005634|GO:0005737|GO:0005739|GO:0006351|GO:0006606|GO:0007623|GO:0009785|GO:0009882|GO:0018298|GO:0042752|GO:2000118	cryptochrome-2 isoform 1	123.122	84.7796	7.12771	6.01669	106.698	146.195	116.472	99.8133	80.3892	74.1363	7.08309	7.00024	7.29981	6.19242	6.06269	5.79496
ASHGA5P050854	0.000221072	0.00583783	3.15188	up	protein_coding	NM_022049	CCDS772.1	GPR88	RefSeq	3465	chr1	+	101003727	101007583		TGAAGAGTTGGCCAGAATGACCAACTCCTCCTCCACATCCACCTCCTCCACCACCGGTGG	54112	Hs.170053	GO:0004930|GO:0005575|GO:0005886|GO:0007186|GO:0016021	probable G-protein coupled receptor 88	1624.89	601.809	10.6558	8.99956	1562.8	1770.55	1541.31	653.877	578.435	573.116	10.7107	10.4283	10.8283	9.04994	9.05689	8.89185
ASHGA5P001835	0.000620006	0.0094889	2.81283	up	protein_coding	NM_024660	CCDS12472.1	IGFLR1	RefSeq	1217	chr19	-	36230150	36233351		CTGCAGAGAGAGGCCGGTCCCTGCCAAGGGGCACTGCCCCCTCACACCTGGAAACCCAGG	79713	Hs.352548	GO:0005515|GO:0005886|GO:0016021	IGF-like family receptor 1 precursor	278.655	132.592	8.19586	6.70384	300.144	297.177	238.645	138.662	131.046	128.068	8.42522	7.936	8.22636	6.69291	6.80749	6.61112
ASHGA5P032698	0.00938968	0.0420193	2.2861	up	protein_coding	NM_138570	CCDS11780.1	SLC38A10	RefSeq	3078	chr17	-	79224670	79269096		TGGCTTGTGATTACCGTTTTATCTCCCTTGCTCCCCTTTAAAACACCTGCGGCATTGTCA	124565	Hs.352240	GO:0006814|GO:0006865|GO:0016021	putative sodium-coupled neutral amino acid transporter 10 isoform b	12537.7	6068.25	13.5453	12.3525	11980.4	17979.9	7652.7	6038.94	5550.72	6615.1	13.5599	13.9597	13.1165	12.294	12.2644	12.499
ASHGA5P050880	5.36757e-05	0.00319434	4.31991	up	protein_coding	NM_014808	CCDS33424.1	FARP2	RefSeq	4061	chr2	+	242295663	242434256		CGCCTGCTGCTGCGCCGCCTATGCGGACATTACAGCCCCGGGCACCATGACTACGCTGAC	9855	Hs.726316	GO:0005089|GO:0005543|GO:0005737|GO:0005829|GO:0005856|GO:0007411|GO:0008092|GO:0016322|GO:0016601|GO:0019898|GO:0035023	FERM, RhoGEF and pleckstrin domain-containing protein 2	1195.51	333.786	10.2206	8.10959	1058.1	1396.41	1132.03	366.125	321.2	314.034	10.153	10.1046	10.4042	8.17892	8.17943	7.97042
ASHGA5P038108	0.00268103	0.0204697	2.48647	up	protein_coding	NM_147161	CCDS593.1	ACOT11	RefSeq	3181	chr1	+	55013806	55076005		TGAGCAGTTTCTCTTGGACAACCGGAATGATCTGGCCCCCAGCCTCCAGACCCTCTAGAT	26027	Hs.729424	GO:0004091|GO:0005737|GO:0006631|GO:0009266|GO:0009409|GO:0035556|GO:0047617	acyl-coenzyme A thioesterase 11 isoform 2	1206.83	571.706	10.2359	8.92177	1300.35	1191.13	1129	589.995	543.989	581.135	10.4656	9.84327	10.3988	8.89618	8.95805	8.91108
ASHGA5P036903	0.00046415	0.00828573	3.75931	up	protein_coding	NM_006943	CCDS12995.1	SOX12	RefSeq	4645	chr20	+	306238	310867		AGGCCTGCTTCCTCTTCTTCCTCTTCTTTTCACAGGTGCTTATTCCTAATAAACATCTTG	6666	Hs.43627	GO:0000976|GO:0001077|GO:0001105|GO:0003677|GO:0005575|GO:0005634|GO:0006357|GO:0021510|GO:0032993|GO:0045165|GO:0045944|GO:0065004	transcription factor SOX-12	9204.1	2748.42	13.1073	11.1969	7901.6	13252.3	6458.41	2865.42	2699.8	2680.03	12.9934	13.4595	12.8691	11.1989	11.2439	11.1478
ASHGA5P015322	0.00431918	0.0262553	2.81808	up	protein_coding	NM_001163811	CCDS54063.1	WDR81	RefSeq	3320	chr17	+	1627833	1641893		CCGCGGAGGGATACAGCCTGCAAGATGGTCCGCTGGCTGTCTGCCAAGCTCGGCCCCACA	124997	Hs.234572	GO:0010923	WD repeat-containing protein 81 isoform 4	49.0256	30.4552	5.94143	4.44672	54.9118	43.3433	48.8218	35.4822	25.9765	29.9069	6.19453	5.46164	6.16813	4.61832	4.31149	4.41034
ASHGA5P053310	0.00436868	0.026452	3.75549	up	protein_coding	NM_015328	CCDS5812.1	AHCYL2	RefSeq	5075	chr7	+	128864854	129070052	NM_001130720	GCTGGAGTCTGAGCCGGTGGTTGCAGCGGAGGCGGTGATGTCGGTGCAGGTTGTGTCAGC	23382	Hs.600789	GO:0004013|GO:0006730	putative adenosylhomocysteinase 3 isoform a	24.8648	12.7981	5.02821	3.11921	17.562	30.8494	26.1831	16.4711	6.73778	15.1855	4.70831	5.01786	5.35845	3.4081	2.5803	3.36922
ASHGA5P039064	0.0014224	0.0144242	7.58146	up	protein_coding	NM_173552	CCDS3130.1	C3orf58	RefSeq	4370	chr3	+	143690639	143711210		TTGCGCCTGCTGGACTTCCTCAACGTGAAGAACGTGTACTTCGCGCAGTACGGCGAGCCC	205428	Hs.288954	GO:0000139|GO:0005576|GO:0030126	deleted in autism protein 1 isoform a precursor	1306.97	216.627	10.3359	7.4134	1030.99	1402.44	1487.48	227.159	269.689	153.034	10.1145	10.1106	10.7825	7.44431	7.91314	6.88275
ASHGA5P012114	1.76917e-05	0.00231359	3.66992	up	protein_coding	NM_138274	CCDS4717.1	C6orf25	RefSeq	2303	chr6	+	31691120	31694485		GCCCCCGGGCCTACCCATGCTCTGTCCCCCCCACATAGCTCCACTTGTGAAAACCGAGCC	80739	Hs.247879	GO:0005783|GO:0005794|GO:0005886|GO:0008201|GO:0016021	protein G6b isoform G6b-D precursor	11145.5	3441.17	13.4198	11.544	10665.7	13770.9	8999.88	3817.01	3092.85	3413.65	13.3915	13.5325	13.3354	11.6372	11.46	11.5348
ASHGA5P008115	0.0149494	0.0562818	2.14112	up	protein_coding	NM_173660	CCDS3370.2	DOK7	RefSeq	2583	chr4	+	3465032	3496209	NM_001164673	ATTCATCTTTGAAGGCGGGACCAGGTGTGGGTACTGGGCTGGCGTCTTCTTCCTGTCCTC	285489	Hs.122110	GO:0005158|GO:0005886|GO:0007528|GO:0019901|GO:0030054|GO:0031594|GO:0035091|GO:0043113|GO:0061098	protein Dok-7 isoform 1	55.518	45.0077	6.09419	4.99583	51.0858	65.6543	49.8138	63.4189	31.7249	39.8794	6.10194	5.98821	6.19242	5.5004	4.62221	4.86487
ASHGA5P002274	0.011093	0.0465021	2.30985	up	protein_coding	NM_001570	CCDS33697.1	IRAK2	RefSeq	3469	chr3	+	10206562	10285427		TGATTCAAAGGACTTCAGCACCTCCATTCCTAAGCAGGAAAAACTTTTGAGCTTGGCTGG	3656	Hs.449207	GO:0000187|GO:0001959|GO:0002224|GO:0002755|GO:0002756|GO:0004672|GO:0005515|GO:0005524|GO:0005829|GO:0005886|GO:0006468|GO:0006954|GO:0007249|GO:0007254|GO:0008063|GO:0009986|GO:0010008|GO:0031663|GO:0032088|GO:0034130|GO:0034134|GO:0034138|GO:0034142|GO:0035666|GO:0035872|GO:0042803|GO:0045087|GO:0046982|GO:0051092|GO:0051092|GO:0051403|GO:0070423|GO:0070498|GO:0070555	interleukin-1 receptor-associated kinase-like 2	65.6311	46.0592	6.24648	5.03869	52.9617	97.1535	46.7781	62.7244	32.2623	43.1909	6.15032	6.48085	6.10828	5.48349	4.64537	4.98721
ASHGA5P054836	0.00454595	0.0269662	2.30033	up	protein_coding	ENST00000453464	CCDS53257.1	RNF223	GENCODE	1122	chr1	-	1007125	1009687		TGATAATTAGGGCCAGCAGCCTCTGCCCAGGTCAGCCGCCCTCGCCCAGCTCCATGGGGC	401934	Hs.568137	GO:0016021|GO:0008270|GO:0005515	ring finger protein 223 [Source:HGNC Symbol;Acc:40020]	5299.57	2660.86	12.3427	11.1409	5808.71	5075.62	5014.37	2753.44	2871.46	2357.67	12.5458	11.9943	12.4882	11.1345	11.3423	10.9459
ASHGA5P054040	0.000544917	0.00899592	2.68184	up	protein_coding	NM_015975	CCDS35340.1	TAF9B	RefSeq	2714	chrX	-	77385244	77395179		GATGACGAGTGGCTGGATAACATGGAGTCGGGCAAGATGGCGCCTCCCAAGAACGCTCCG	51616	Hs.592248	GO:0000122|GO:0003714|GO:0005515|GO:0005669|GO:0006352|GO:0012501|GO:0014070|GO:0030307|GO:0033276|GO:0043066|GO:0046982	transcription initiation factor TFIID subunit 9B	115.174	64.9362	7.03317	5.60995	95.4276	139.751	110.344	75.9618	60.9479	57.8989	6.9299	6.94188	7.22773	5.77654	5.62944	5.42387
ASHGA5P025241	0.0174567	0.0622508	2.05183	up	protein_coding	NM_001267779		ZNF850	RefSeq	7626	chr19	-	37234379	37263716		GTCTCACTAGACTCGGAGTTTAGATGTAAGACCAAAGATTCATGTTTGCCAAAAGAAATC	342892	Hs.406307	GO:0003677|GO:0005634|GO:0006351|GO:0006355|GO:0008270	zinc finger protein 850 isoform 2	16.1131	15.4628	4.43381	3.39689	19.9485	17.9417	10.4491	13.8369	14.6442	17.9073	4.8742	4.30589	4.12133	3.14774	3.417	3.62594
ASHGA5P048203	0.00092943	0.0116135	3.84622	up	protein_coding	NM_138456	CCDS8087.1	BATF2	RefSeq	2142	chr11	-	64755416	64764517		ACCCCAAGGAGCAACAAAGGCAGCTGAAGAAGCAGAAGAACCGGGCAGCCGCCCAGCGAA	116071	Hs.124840	GO:0003700|GO:0005515|GO:0005634|GO:0043565|GO:0046983	basic leucine zipper transcriptional factor ATF-like 2	14.3516	5.08907	4.31637	2.37292	11.9782	14.3734	16.7032	5.26722	5	5	4.19004	4.01521	4.74386	2.42953	2.34646	2.34278
ASHGA5P053243	2.66413e-05	0.00264091	2.96924	up	protein_coding	NM_032959	CCDS43627.1	POLR2J2	RefSeq	1987	chr7	-	102277194	102312176		TAAATGCCCCCAAAACCTCCCTGCCTGTCCGTGACATCATACACCTGGGTAGTCTTTCTG	246721	Hs.732239	GO:0003677|GO:0003899|GO:0005634|GO:0006351	DNA-directed RNA polymerase II subunit RPB11-b1	11762.7	4561.99	13.511	11.9409	12386.9	12692.8	10208.4	4633.63	4524.7	4527.64	13.6269	13.3873	13.5188	11.9063	11.9781	11.9383
ASHGA5P007737	0.00014937	0.00498902	2.21862	up	protein_coding	NM_003549	CCDS2815.1	HYAL3	RefSeq	1945	chr3	-	50330258	50336899	NM_001200030	GCATCAACATGTTTCCATCCTTGGGGAATGACCACGCAACTGGGCCCAGCCCTGGTGCTG	8372	Hs.129910	GO:0001618|GO:0004415|GO:0004415|GO:0005576|GO:0005764|GO:0005975|GO:0006954|GO:0009615|GO:0030214|GO:0031410|GO:0033906|GO:0046677|GO:0051216|GO:0071347|GO:0071356|GO:0071493	hyaluronidase-3 isoform 1 precursor	11.2402	10.2829	3.9739	2.82424	10.1287	14.8292	8.76264	10.3918	10.811	9.6458	3.96754	4.05586	3.89831	2.76628	2.95982	2.74661
ASHGA5P017929	0.00101106	0.0120661	2.29356	up	protein_coding	NM_207354	CCDS31616.2	ANKRD13D	RefSeq	2150	chr11	+	67056761	67069955		CAGCCACCAGCACGACATTGAACAGGAGGACCCCCGCGGGCGGACCCCACTGGAGCTGGC	338692	Hs.438673		ankyrin repeat domain-containing protein 13D	35.2554	27.3226	5.48565	4.28807	38.113	42.5075	25.1458	26.6084	26.8586	28.5008	5.72396	5.43375	5.29925	4.16617	4.3595	4.33853
ASHGA5P045409	0.000493027	0.00856352	5.95862	up	protein_coding	NM_003408	CCDS6787.1	ZFP37	RefSeq	2752	chr9	-	115804173	115818996		TGCTCAGAGCAACCTGTATAATGATGTGATGCTGGAGAACTACTGCAACCAAGCCTCAAT	7539	Hs.150406	GO:0003677|GO:0003700|GO:0005634|GO:0006351|GO:0006355|GO:0008270|GO:0008283|GO:0030154	zinc finger protein 37 homolog	48.1209	14.212	5.83344	3.25846	45.4144	70.266	28.6822	16.8639	14.6624	11.1096	5.94887	6.07208	5.47936	3.44092	3.41848	2.91598
ASHGA5P005544	0.000967047	0.011821	5.47584	up	protein_coding	ENST00000307050	CCDS10026.1	OTUD7A	GENCODE	3042	chr15	-	31775328	31947542		GAATAAGGAGGAGGAGTGGGAGCGGGAGTGGACGGAGCTGCTGAAGCTGGCCTCCAGCGA	161725	Hs.355236	GO:0006508|GO:0005634|GO:0005737|GO:0003677|GO:0008270|GO:0005515|GO:0008234	OTU domain containing 7A [Source:HGNC Symbol;Acc:20718]	233.849	59.3839	7.90014	5.44706	185.185	348.618	167.744	72.0261	64.4069	41.7186	7.78703	8.13542	7.77797	5.69111	5.71628	4.93379
ASHGA5P006885	0.00970891	0.0428381	2.20581	up	protein_coding	NM_053280	CCDS7688.1	ODF3	RefSeq	1331	chr11	+	196760	200258		CCTACACAAGACCCCAGGTCCCGCAGCCTACCGCCAAACTGATGTGCGGGTGACCAAGTT	113746	Hs.350949	GO:0001520|GO:0005737|GO:0007275|GO:0007283|GO:0030154	outer dense fiber protein 3	1755.31	919.775	10.7659	9.62461	1880.02	1642.61	1743.31	914.301	977.558	867.466	10.9682	10.3164	11.0132	9.55009	9.82007	9.50365
ASHGA5P006864	4.99939e-05	0.00312245	3.76625	up	protein_coding	NM_020360	CCDS42253.1	PLSCR3	RefSeq	2089	chr17	-	7293046	7298162	NM_001201576, NR_037719	CCCATGGCAGGCTACTTGCCCCCCAAAGGCTACGCCCCTTCGCCCCCACCTCCCTACCCT	57048	Hs.534591	GO:0005509|GO:0005515|GO:0005886|GO:0005886|GO:0016021|GO:0017121|GO:0017124|GO:0017128|GO:0048306	phospholipid scramblase 3	13330.9	4122.55	13.7125	11.7994	13369.9	13760.8	12861.9	4368.02	3843.38	4156.25	13.7316	13.5298	13.8761	11.8293	11.7516	11.8173
ASHGA5P055917	0.000338167	0.00706227	4.4001	up	protein_coding	NM_020372	CCDS9593.1	SLC22A17	RefSeq	2090	chr14	-	23815526	23821479		CTGTGGGATTGTGAGCATCCTATCTTCCCCACAGTGTGGGCTCAACAAGGGAACCCCAAC	51310	Hs.373498	GO:0004888|GO:0005774|GO:0005887|GO:0015891|GO:0022857|GO:0031301	solute carrier family 22 member 17 isoform a	96.3767	35.7443	6.8228	4.68526	99.6884	103.395	86.0467	43.7987	29.3042	34.13	6.9911	6.5598	6.91749	4.93865	4.49408	4.62305
ASHGA5P054459	0.000151925	0.005002	2.94673	up	protein_coding	NM_001135196	CCDS44387.1	C10orf71	RefSeq	5286	chr10	+	50507186	50535537		CATTTCTTGAGTTACTGCAGGCTGTCCCCCACCCCCAGATGAACCCAGAGGAGCTTACTT	118461	Hs.585480		uncharacterized protein C10orf71 isoform 1	30817	12889	15.031	13.4719	32914.1	31484	28052.9	13168.1	14093.9	11405.2	15.1298	14.8684	15.0947	13.4432	13.6149	13.3575
ASHGA5P052853	0.000140186	0.00483162	3.37687	up	protein_coding	NM_052913	CCDS5140.1	TMEM200A	RefSeq	5042	chr6	+	130758261	130764210	NM_001258276, NM_001258277, NM_001258278	AGGCCAAGCTATGATAGCAACTGGTGGAGTGATAACTGGCCTGGCCGCCTTGAAAAGGCA	114801	Hs.591341	GO:0016021	transmembrane protein 200A	13.7647	6.21291	4.23396	2.47827	10.6556	18.8318	11.8067	6.42673	5	7.21201	4.03635	4.3725	4.29302	2.50499	2.34646	2.58336
ASHGA5P049392	0.00334275	0.0230715	2.62677	up	protein_coding	ENST00000325921	CCDS10993.1	PRDM7	GENCODE	2442	chr16	-	90122973	90128733		AATCCCTGCTTCCCTCACTTCCAGATTGTGAGATGTGTCAGAACTTCTTCATTGACAGCT	11105	Hs.406695	GO:0007283|GO:0045944|GO:0007128|GO:0010520|GO:0005634|GO:0005694|GO:0043565|GO:0042800	PR domain containing 7 [Source:HGNC Symbol;Acc:9351]	2998.72	1302.69	11.4894	10.0961	2297.24	4055.23	2643.69	1490.27	1388.25	1029.54	11.2355	11.665	11.5677	10.2392	10.3127	9.73635
ASHGA5P052922	0.000618875	0.00948503	2.28895	up	protein_coding	NM_001129895		HGC6.3	RefSeq	1016	chr6	-	168376603	168377619		CCTCCTCCCAACACACTGCAGGGGGAATGACCCCCACTGTCTTCTCCTCCCAACACACTG	100128124	Hs.448059		uncharacterized protein LOC100128124	3132.44	1531.58	11.5417	10.347	2861.72	4245.86	2289.73	1518.75	1539.93	1536.06	11.5169	11.7425	11.3656	10.2687	10.4527	10.3195
ASHGA5P053760	0.000936173	0.0116377	3.20939	up	protein_coding	NM_153698	CCDS35073.1	AAED1	RefSeq	1242	chr9	-	99403532	99417599		GAGCGGACCCAGGCCCTCGGCCGCCCCGCGTCATGGCCGCGCCGGCCCCGGTCACGCGGC	195827	Hs.44640		UPF0308 protein C9orf21	342.73	141.6	8.48206	6.79976	337.56	376.742	313.889	143.795	156.951	124.053	8.58419	8.25293	8.60907	6.7516	7.08724	6.56045
ASHGA5P051264	0.000891766	0.0113895	3.12281	up	protein_coding	NM_001135772	CCDS33626.1	LRP5L	RefSeq	1686	chr22	-	25747384	25777544	NM_002335, NM_182492	CCCCACACAACCCGGTTTGGCTGCCCCATCTAGGGCCTGGAACTGCTGAGTGACATGAAG	91355	Hs.634058	GO:0017147|GO:0042813|GO:0044332|GO:0060070	low-density lipoprotein receptor-related protein 5-like protein	3983.03	1476.02	11.9318	10.2889	4302.74	3918.19	3728.15	1482.23	1547.6	1398.22	12.1181	11.606	12.0713	10.2296	10.4603	10.177
ASHGA5P008683	0.0116166	0.0476655	4.30756	up	protein_coding	NM_173844	CCDS11968.1	MALT1	RefSeq	4996	chr18	+	56338617	56417370		GTCAAGATAGCAAGAAGGTAGAAATCATCATAGATGAATTAAATAATCTTGGTCATCCTG	10892	Hs.601217	GO:0001923|GO:0002020|GO:0002237|GO:0002726|GO:0004197|GO:0004842|GO:0004871|GO:0005515|GO:0005634|GO:0005730|GO:0005737|GO:0005829|GO:0005886|GO:0006508|GO:0006952|GO:0007250|GO:0008233|GO:0009620|GO:0016567|GO:0019209|GO:0031398|GO:0032449|GO:0032743|GO:0042098|GO:0042981|GO:0043123|GO:0043234|GO:0043621|GO:0045087|GO:0048471|GO:0050852|GO:0050852|GO:0050856|GO:0050870|GO:0051092|GO:0051168|GO:…	mucosa-associated lymphoid tissue lymphoma translocation protein 1 isoform b	41.2136	14.9214	5.44138	3.33451	16.4561	78.0513	29.1334	17.7491	14.5607	12.4543	4.61725	6.20479	5.50209	3.51859	3.40688	3.07805
ASHGA5P006453	0.0078504	0.0372913	2.8242	up	protein_coding	NM_001040002	CCDS42343.1	MEOX1	RefSeq	2184	chr17	-	41717757	41739262	NM_004527	AATCATCCAGGCGGAGAAAGGAGAGTTCAGACAACCAGGAGAACAGAGGGAAGCCGGAGG	4222	Hs.438	GO:0001757|GO:0003674|GO:0003682|GO:0003700|GO:0005575|GO:0005730|GO:0007275|GO:0008150|GO:0043565|GO:0045944|GO:0071837	homeobox protein MOX-1 isoform 3	13.5166	8.72196	4.18928	2.69144	8.24667	15.9057	16.3974	9.79466	9.43334	6.93788	3.69653	4.15122	4.72009	2.71595	2.79328	2.56509
ASHGA5P013431	0.0199909	0.0680533	2.36348	up	protein_coding	NM_198046	CCDS7460.1	ZDHHC16	RefSeq	1973	chr10	+	99205946	99217127		TCAAGGACAAAGCCCTCCCTGGCTGCCTCAGGGCAAAATCAGGAACCATGCGAGGCCAGC	84287	Hs.76662	GO:0005789|GO:0006915|GO:0008270|GO:0016021|GO:0016746	probable palmitoyltransferase ZDHHC16 isoform 1 precursor	639.801	335.269	9.31035	8.06944	671.714	713.513	534.175	228.298	380.799	396.711	9.5088	9.10783	9.31442	7.45136	8.42562	8.33133
ASHGA5P014152	0.000653716	0.00969582	3.00277	up	protein_coding	ENST00000400308	CCDS46652.1	PCBP3	GENCODE	1911	chr21	+	47269874	47362368		AGATCTGTGTGGTCATGCTGGAGGCCTACACAATCCAGGGACAGTATGCCATCCCTCACC	54039	Hs.474049	GO:0016071|GO:0005634|GO:0005829|GO:0005739|GO:0043231|GO:0030529|GO:0003723|GO:0003677	poly(rC) binding protein 3 [Source:HGNC Symbol;Acc:8651]	112.607	55.6478	6.96063	5.37434	77.7849	158.179	101.856	60.1914	47.4673	59.2849	6.65808	7.09651	7.12731	5.41904	5.24597	5.45801
ASHGA5P055284	0.000703843	0.0101069	2.26377	up	protein_coding	NM_024865	CCDS31736.1	NANOG	RefSeq	2098	chr12	+	7941994	7948655		TTTTTCCTCCTCTTCCTCTATACTAACATGAGTGTGGATCCAGCTTGTCCCCAAAGCTTG	79923	Hs.635882	GO:0001714|GO:0003677|GO:0003700|GO:0005634|GO:0005730|GO:0006351|GO:0006355|GO:0008283|GO:0009790|GO:0010468|GO:0030154|GO:0035019|GO:0043565|GO:0045595|GO:0045944	homeobox protein NANOG	1779.98	899.085	10.7681	9.5894	1509.2	2332.37	1498.37	1009.56	902.368	785.324	10.6691	10.8456	10.7897	9.70032	9.70562	9.36227
ASHGA5P028725	1.11297e-06	0.00125934	3.37258	up	protein_coding	ENST00000435039		C1QTNF9B-AS1	GENCODE	701	chr13	+	24463591	24466242		AGCGTCGCTCCCCCTCGCCTTCTCGGCCGCCCTCCCGGTTTACCGCCCCCTGTGTCCAGA				C1QTNF9B antisense RNA 1 (non-protein coding) [Source:HGNC Symbol;Acc:39839]	23567.7	8381.39	14.5885	12.8347	24000.4	26183	20519.7	8867.74	7812.75	8463.69	14.6078	14.5523	14.6055	12.862	12.7716	12.8703
ASHGA5P009165	0.000255071	0.00624246	5.64438	up	protein_coding	ENST00000396901	CCDS42552.1	NFKBID	GENCODE	1834	chr19	-	36379142	36391552		TTGACATTCGTGAGCATAAGGGCAAGACCCCTCTCCTGGTGGCGGCTGCTGCCAACCAGC	84807	Hs.466531	GO:0006954|GO:0032088|GO:0043124|GO:0070245|GO:0033085|GO:0005634|GO:0005515|GO:0051059	nuclear factor of kappa light polypeptide gene enhancer in B-cells inhibitor, delta [Source:HGNC Symbol;Acc:15671]	2874.53	582.536	11.4494	8.95256	3038.96	2708.59	2876.02	595.054	579.96	572.595	11.5982	11.0602	11.6897	8.90733	9.06122	8.88912
ASHGA5P053312	0.00138558	0.014251	2.03251	up	protein_coding	NM_001195243		LOC100287482	RefSeq	1068	chr7	+	129142319	129152773		TAAGGGCTTCGGGATCGGGAGAGTCCACCACGCCTGCCTGCTCGGCTGAGAATCGCCATG	100287482	Hs.178144		uncharacterized protein LOC100287482	321.471	203.998	8.38763	7.36437	322.554	353.915	287.945	204.56	202.234	205.199	8.51782	8.15753	8.48753	7.29049	7.4803	7.32231
ASHGA5P005342	0.00105693	0.0122797	3.09304	up	protein_coding	NM_001142627	CCDS44358.1	SEC61A2	RefSeq	2129	chr10	+	12171639	12211957		AGATACCTCTATGGTTCATGAGCTTAATAGACCAAAAGTGAAGTTAAGAAGGTGGAAGGG	55176	Hs.112955	GO:0002474|GO:0002479|GO:0003674|GO:0005789|GO:0008150|GO:0015031|GO:0016021|GO:0042590	protein transport protein Sec61 subunit alpha isoform 2 isoform c	106.004	51.3333	6.87595	5.24692	85.2292	155.159	77.6239	59.7641	52.9298	41.306	6.77148	7.07573	6.78063	5.41081	5.41081	4.91913
ASHGA5P005587	0.00294274	0.0214847	2.38192	up	protein_coding	NM_030767	CCDS6805.1	AKNA	RefSeq	7387	chr9	-	117096432	117156685		TCGGGAGAAGAGGCTGAAGCAGAGGATGTGGACAGCCCAGCAAGTTCCCATGAGCCTCTT	80709	Hs.494895	GO:0003677|GO:0005634|GO:0006351|GO:0006355	AT-hook-containing transcription factor	11.4902	9.15689	4.02713	2.77501	10.8154	13.3804	10.2748	8.32997	12.2895	6.85119	4.05485	3.92462	4.10193	2.6202	3.14568	2.55915
ASHGA5P034623	0.000366461	0.00738734	2.69606	up	protein_coding	NM_002446	CCDS12549.1	MAP3K10	RefSeq	3453	chr19	+	40697650	40721482		AAGGAAGCAAACAGTGGTCATCAAGTGCCCCCAACCTGGGCAAGTCCCCCAAACACACAC	4294	Hs.466743	GO:0003714|GO:0004672|GO:0004674|GO:0004706|GO:0005524|GO:0005737|GO:0006917|GO:0007165|GO:0007224|GO:0007254|GO:0007256|GO:0007257|GO:0018105|GO:0018107|GO:0042803|GO:0043425|GO:0043433|GO:0043507|GO:0045892|GO:0045892|GO:0046330|GO:0046777	mitogen-activated protein kinase kinase kinase 10	596.082	269.195	9.20547	7.77462	614.624	683.37	490.252	268.402	231.599	307.583	9.38249	9.04901	9.18491	7.6956	7.68575	7.9425
ASHGA5P043944	0.0229972	0.0745646	2.07701	up	protein_coding	NM_001061	CCDS5855.1	TBXAS1	RefSeq	2082	chr7	+	139528951	139720125	NM_001130966, NM_001166253, NM_001166254, NR_029394	TAGGGCTGCTTGAGGTCAAGTTGACACTGCTCCACGTGCTGCACAAGTTCCGGTTCCAAG	6916	Hs.520757	GO:0001516|GO:0004497|GO:0004796|GO:0005506|GO:0005789|GO:0006690|GO:0006805|GO:0009055|GO:0016021|GO:0016705|GO:0020037|GO:0044281	thromboxane-A synthase isoform 1	60.0396	49.5002	6.20043	5.14593	52.6869	65.9922	61.4396	56.6469	32.0056	59.848	6.14324	5.99307	6.46499	5.33041	4.63483	5.47254
ASHGA5P000721	0.00248801	0.0195441	2.74125	up	protein_coding	NM_015015	CCDS12138.1	KDM4B	RefSeq	5675	chr19	+	4969123	5153608		TCCTCCGCAGGTCTCACCGGAAACGGAGCCAGCCCAAGAAGCCGAAGCCCGAAGACCCCA	23030	Hs.654816	GO:0005634|GO:0006351|GO:0006355|GO:0008270|GO:0016568|GO:0016702	lysine-specific demethylase 4B	23.8873	17.047	5.0035	3.54866	21.2297	23.8753	26.5568	19.0154	16.6532	15.4722	4.95271	4.6829	5.37488	3.63485	3.61258	3.39856
ASHGA5P004614	0.000268632	0.00639333	4.31566	up	protein_coding	NM_139118	CCDS1115.1	YY1AP1	RefSeq	2676	chr1	-	155629232	155658823	NM_001198906	ACCCAGGGAGTCGGCTTACCCGCTGGCCGCCTCCTGACAAGCGGGAGGGATCCGCGGTGG	55249	Hs.584927	GO:0005515|GO:0005634|GO:0005730|GO:0005737|GO:0006351|GO:0006355|GO:0051726	YY1-associated protein 1 isoform 2	113.539	40.4756	7.0075	4.89792	87.5093	132.855	120.254	44.337	38.5205	38.5693	6.80522	6.8743	7.34298	4.95889	4.92199	4.81288
ASHGA5P006474	7.4598e-05	0.00369739	5.11776	up	protein_coding	NM_182775	CCDS43080.1	ALS2CL	RefSeq	3324	chr3	-	46710484	46718899	NM_001190707, NM_147129	AAGCAGCATGCCCAGGAACTCTGGGCTGCCTACAGGGGTCTGCTGCGAGTTGCCTTAGAG	259173	Hs.517937	GO:0005089|GO:0005096|GO:0007032|GO:0008104|GO:0016023|GO:0017137|GO:0035023|GO:0042802	ALS2 C-terminal-like protein isoform 3	52.6164	18.5727	6.03325	3.67774	50.4368	57.4547	49.9576	21.613	16.0388	18.0663	6.08632	5.81728	6.19614	3.83957	3.55497	3.63867
ASHGA5P001528	0.00487941	0.0281484	3.6193	up	protein_coding	NM_001110781	CCDS44041.1	SLC35E2B	RefSeq	6020	chr1	-	1592938	1624243		CAAAAAAGCTGCTCAGCGGGGACAAATACAGGTTCTCGGCCCCGGAGCTGCAGTTCTACA	728661	Hs.655255	GO:0016021	solute carrier family 35 member E2B	20.331	11.1337	4.76908	2.91338	15.8307	19.3931	25.7691	14.6662	9.08768	9.64715	4.56392	4.40808	5.33526	3.23751	2.75592	2.74669
ASHGA5P020665	0.00629219	0.0327705	2.57146	up	protein_coding	ENST00000518157	CCDS12464.1	SBSN	GENCODE	957	chr19	-	36014268	36019253		ACAACGCTGCTGGACAGGCCGGGAAGGAAGCAGACAAAGCGGTCCAAGGGTTCCACACTG	374897	Hs.433484	GO:0005576	suprabasin [Source:HGNC Symbol;Acc:24950]	9.01949	5	3.70591	2.34333	8.8696	7.88824	10.3006	5	5	5	3.793	3.21932	4.10542	2.34074	2.34646	2.34278
ASHGA5P004377	0.0183306	0.0643267	2.96761	up	protein_coding	ENST00000291187	CCDS42574.1	ZNF229	GENCODE	4964	chr19	-	44930425	44952665		GAGGAATCCTCTGGGAGACAAGAATGGAAAGGATACGGAGTATATTCAAGATGAAGAATT	7772	Hs.709348	GO:0006351|GO:0006355|GO:0005634|GO:0005622|GO:0003677|GO:0008270|GO:0003676	zinc finger protein 229 [Source:HGNC Symbol;Acc:13022]	23.1657	15.5459	4.89122	3.32192	22.7156	32.276	14.5053	11.4553	11.2522	23.93	5.04037	5.07397	4.55931	2.88485	3.01821	4.06269
ASHGA5P039988	0.000773266	0.0106164	5.98715	up	protein_coding	NM_178497	CCDS3569.1	C4orf26	RefSeq	1882	chr4	+	76481257	76491103	NM_001206981	GTGTAACCACCGTTTTCCATTCCAGCCATTTTATTGGCCACACCGTTACCTTACTTATAG	152816	Hs.24510	GO:0005576	uncharacterized protein C4orf26 isoform 2 precursor	167.392	41.15	7.45485	4.87298	153.135	245.434	103.607	56.6514	33.5219	33.2765	7.55301	7.66628	7.14526	5.33053	4.70603	4.58238
ASHGA5P003832	0.000467521	0.00830643	2.19587	up	protein_coding	NM_022146	CCDS53539.1	NPFFR1	RefSeq	1311	chr10	-	72014712	72043450		ATCATGGAGGGGGAGCCCTCCCAGCCTCCCAACAGCAGTTGGCCCCTAAGTCAGAATGGG	64106	Hs.302026	GO:0004930|GO:0005886|GO:0007218|GO:0008150|GO:0008188|GO:0016021	neuropeptide FF receptor 1	509.113	285.068	8.99989	7.8651	483.854	580.136	463.35	310.532	242.01	302.663	9.05932	8.82133	9.11904	7.9275	7.74784	7.91997
ASHGA5P036462	0.000120865	0.00448981	4.02039	up	protein_coding	NM_024293	CCDS2434.1	FAM134A	RefSeq	4625	chr2	+	220042938	220050197		TGGTGGCCTCACTGCTCTGCCCGGCACCCTGTCACCTCCACTTTGCCTTGTTGGAAGTGA	79137	Hs.516707	GO:0005783|GO:0016021	protein FAM134A	4880.34	1407.6	12.2273	10.22	5067.94	5056.97	4516.12	1552.23	1352.97	1317.62	12.3527	11.9909	12.3384	10.2999	10.2712	10.0889
ASHGA5P051194	0.00271302	0.0205641	2.01105	up	protein_coding	NM_001130861	CCDS13763.2	CLDN5	RefSeq	2332	chr22	-	19510546	19512860		AAGAGCCGTTGTTTCCCTAACTTCAGCTGCCAGAGGCTCTGTGATTGGCTGCGGCACGAT	7122	Hs.505337	GO:0005198|GO:0005911|GO:0005923|GO:0016021|GO:0016338|GO:0042802	claudin-5	53.0562	44.3958	6.04538	5.03744	50.2366	55.5566	53.3753	49.1326	40.0351	44.0196	6.0824	5.77355	6.28021	5.1131	4.98453	5.01469
ASHGA5P045195	0.00518513	0.0291756	3.809	up	protein_coding	NM_001141917	CCDS55305.1	FAM205A	RefSeq	4311	chr9	-	34723049	34729535		TAGGAGACGTTCCCGGGAAGAAGCTGAGAAGCCACAGAAGCTGCTCTCCATCATTAAAAG	259308	Hs.522093	GO:0016021	protein FAM205A	311.383	112.324	8.35206	6.42265	327.758	282.007	324.383	128.057	126.946	81.97	8.54332	7.86149	8.65136	6.56223	6.75984	5.94586
ASHGA5P010319	0.000176784	0.00527371	2.13352	up	protein_coding	NM_004384	CCDS4135.1	CSNK1G3	RefSeq	4251	chr5	+	122881110	122952738	NM_001044723	CAGACAGACATGGTGGCTCGGTACAGGTTGTAAGTTCTACAAATGGAGAGTTAAACACAG	1456	Hs.129206	GO:0004672|GO:0004674|GO:0005524|GO:0005737|GO:0006464|GO:0007165|GO:0016055	casein kinase I isoform gamma-3 isoform 1	149.781	100.458	7.37249	6.27926	134.539	188.989	125.814	107.951	100.594	92.8288	7.38481	7.32231	7.41035	6.30625	6.397	6.13453
ASHGA5P037862	0.000598043	0.0093738	4.217	up	protein_coding	NM_001039948	CCDS46674.1	SGSM1	RefSeq	6201	chr22	+	25202135	25322813	NM_133454	ACTTCTTGGGCAGCACTTCCTCCGTCTCTGTGGGCCCTGCCTGGATGATGGTTCCTGCAG	129049	Hs.474397	GO:0005097|GO:0005794	small G protein signaling modulator 1 isoform 1	4665.3	1286.01	12.1672	10.091	4774.6	4452.97	4768.33	1369.06	1329.55	1159.41	12.2749	11.8061	12.4207	10.1185	10.25	9.90451
ASHGA5P043984	0.00769222	0.0368497	2.46153	up	protein_coding	NM_012369	CCDS5887.1	OR2F1	RefSeq	1089	chr7	+	143657019	143658108		TTGACTCATGAGTATGACTTAGAGAAAACAGCTTTGCCTCAGTGTTCTCCACCCAGCTGA	26211	Hs.553595	GO:0004930|GO:0004984|GO:0005886|GO:0007165|GO:0016021	olfactory receptor 2F1	323.557	169.589	8.37886	7.07931	408.719	298.502	263.45	180.829	162.058	165.88	8.83651	7.94162	8.35846	7.09478	7.14253	7.00061
ASHGA5P039770	2.93583e-05	0.00269605	2.03021	up	protein_coding	NM_001141936	CCDS47000.2	C4orf48	RefSeq	483	chr4	+	2043776	2045697	NM_001168243	GGCCCCGCTCCCTCTGCTGGCCATGGCCCCCCCGCCCGCGTGCCGGTCCCCGATGTCACC	401115	Hs.446474	GO:0005576	neuropeptide-like protein C4orf48 isoform 2 precursor	98047.2	70129	16.9162	15.8945	101729	103713	88699.5	72564.8	73148.7	64673.6	16.9654	16.8655	16.9176	15.9565	15.9036	15.8235
ASHGA5P014396	0.000490094	0.00852732	3.65215	up	protein_coding	NM_015094	CCDS13789.1	HIC2	RefSeq	6812	chr22	+	21771692	21805750		TGGCACTCCGGTGGTGCGCGTGGGCAGGGCGCGGGGACATGGGGCCCGACATGGAGCTGC	23119	Hs.632767	GO:0003677|GO:0005634|GO:0005730|GO:0005886|GO:0005925|GO:0006351|GO:0008022|GO:0008270|GO:0045892	hypermethylated in cancer 2 protein	92.9987	39.6227	6.71661	4.84786	65.9822	131.254	81.7604	48.0519	33.335	37.4812	6.44229	6.8582	6.84933	5.07852	4.69702	4.76804
ASHGA5P003815	0.0113887	0.0471925	2.23876	up	protein_coding	ENST00000277517	CCDS7055.1	IDI2	GENCODE	1359	chr10	-	1064846	1071799		TGGGGAGCAGATTTCTCCAGAGGACATTGTGTTCATGACAATCTATCACCACAAGGCAAA	91734	Hs.591325	GO:0044281|GO:0008299|GO:0006695|GO:0050992|GO:0005829|GO:0005777|GO:0046872|GO:0016787|GO:0004452	isopentenyl-diphosphate delta isomerase 2 [Source:HGNC Symbol;Acc:23487]	504.652	280.433	8.99299	7.83029	496.197	509.854	507.904	265.203	328.168	247.929	9.09121	8.64745	9.24032	7.67624	8.21293	7.6017
ASHGA5P033843	0.00103945	0.0121991	2.67743	up	protein_coding	ENST00000389474	CCDS32819.1	SIGLEC15	GENCODE	1505	chr18	+	43405544	43422521		TTCAGATGCTCACAGCATGGAAAAGTCCATCTGGCTGCTGGCCTGCTTGGCGTGGGTTCT	284266	Hs.287692	GO:0016021|GO:0005515	sialic acid binding Ig-like lectin 15 [Source:HGNC Symbol;Acc:27596]	148.886	81.6338	7.38974	5.96889	143.124	154.376	149.159	85.4153	74.379	85.1072	7.46932	7.07107	7.62883	5.9628	5.94349	6.00039
ASHGA5P051479	0.000481033	0.00846508	2.37215	up	protein_coding	NM_015444	CCDS54573.1	TMEM158	RefSeq	1876	chr3	-	45265955	45267814		CCGCCGCAGGCCATGCTGCCCCTGCTCGCCGCGCTCCTGGCCGCCGCCTGCCCGCTGCCG	25907	Hs.740403	GO:0016021	transmembrane protein 158 precursor	30878.2	15959.2	15.0269	13.7807	29696.2	33917.5	29021	16795.8	13873.2	17208.7	14.9514	14.9692	15.1601	13.8201	13.5924	13.9297
ASHGA5P053831	0.031568	0.092437	2.18159	up	protein_coding	NM_001134431	CCDS48025.1	TOR2A	RefSeq	2300	chr9	-	130493802	130497628	NM_001085347, NM_001134430, NM_001252018, NM_001252021, NM_001252023, NM_130459	TCGGGCCTCACCCGGATGGCGGCTGCGACGCGCGGCTGCCGGCCCTGGGGCTCGCTCCTC	27433	Hs.444106	GO:0005179|GO:0005524|GO:0005576|GO:0005788|GO:0017111|GO:0051085|GO:0051260	prosalusin isoform d precursor	15.7269	14.3237	4.38425	3.25887	9.32934	18.8314	19.0199	17.2088	10.7676	14.9946	3.85321	4.37233	4.9272	3.46924	2.95496	3.3524
ASHGA5P033656	0.0321107	0.0936008	2.08282	up	protein_coding	ENST00000269500	CCDS12002.1	FBXO15	GENCODE	1749	chr18	-	71740587	71814999	NM_001142958	CTTAGATTTATGTGGCATGACACCAGTTTTTACCGACTGGTATAAAACTCCCACCAAACA	201456	Hs.664011	GO:0019005|GO:0005515	F-box protein 15 [Source:HGNC Symbol;Acc:13617]	23.5015	21.0645	4.89679	3.83825	25.5743	31.8825	13.0477	27.7445	14.9153	20.5338	5.20025	5.05943	4.43068	4.23203	3.44414	3.83859
ASHGA5P049559	0.0087492	0.0402298	2.3265	up	protein_coding	NM_173484	CCDS508.1	KLF17	RefSeq	3131	chr1	+	44584521	44600809		AGACCCACAGGCCAACAACAACAATGGAGAGCAGGACAGTCCTCCTGCTGCTGGTCCTTA	128209	Hs.567674	GO:0003700|GO:0005634|GO:0006351|GO:0006357|GO:0007276|GO:0008270|GO:0044212	Krueppel-like factor 17	62.8859	45.4304	6.26879	5.05063	68.0018	61.4622	59.1938	57.341	42.2069	36.7434	6.48745	5.90259	6.41634	5.34675	5.06658	4.73857
ASHGA5P014180	0.0075088	0.0364284	3.22823	up	protein_coding	NM_001040007	CCDS42845.1	RSPO4	RefSeq	2539	chr20	-	939095	982907		GAGTGCCAGGAGAGGAGCCCCGGCCAGAAGAAGGGCAGGAAGGACCGGCGCCCACGCAAG	343637	Hs.444980	GO:0005576|GO:0008201|GO:0016055	R-spondin-4 isoform 2 precursor	26.7299	15.4023	5.0797	3.38896	15.3826	34.9555	29.8515	13.1384	16.4654	16.603	4.52399	5.1773	5.5378	3.06806	3.59608	3.50273
ASHGA5P013594	0.00195937	0.0170116	2.20054	up	protein_coding	NM_001145250	CCDS46453.1	SP9	RefSeq	1455	chr2	+	175199820	175202268		TATACTCGGGGAAGAGCCGCGCTTCGGAACGACCCCGTTGGCCATGCTGGCGGCGACCTG	100131390	Hs.516603	GO:0003677|GO:0005634|GO:0006351|GO:0006355|GO:0008270|GO:0030326	transcription factor Sp9	52.6637	40.828	6.02779	4.88994	51.5587	60.1419	46.2905	42.2224	32.4881	47.7734	6.11535	5.87275	6.09528	4.88064	4.65695	5.13223
ASHGA5P012521	0.00219137	0.0181579	2.32863	up	protein_coding	NM_018188	CCDS31.1	ATAD3A	RefSeq	2656	chr1	+	1447522	1470067		AGCAACAGTCCAAGCTCAAAATGCGGCTGGAAGCCCTGAGCCTGCTGCACACACTAGTCT	55210	Hs.23413	GO:0005524|GO:0005739|GO:0005743|GO:0016021|GO:0016049|GO:0017111|GO:0042645|GO:0043066	ATPase family AAA domain-containing protein 3A isoform 1	36.7202	28.5412	5.5718	4.35232	38.9203	37.0226	34.2177	30.8729	24.4789	30.2718	5.75075	5.25071	5.71393	4.40647	4.21954	4.43094
ASHGA5P051316	0.000441213	0.00802577	2.47343	up	protein_coding	NM_152243	CCDS13949.1	CDC42EP1	RefSeq	2182	chr22	+	37956470	37965410		CGGTGGCAGCTCCGGGAGCACCCATCGCTCACCCCGCAGCTTCCTGGCCAAGAAGCTGCA	11135	Hs.225356	GO:0005515|GO:0005737|GO:0005794|GO:0005886|GO:0007266|GO:0008360|GO:0012505|GO:0015629|GO:0031274	cdc42 effector protein 1	478.768	241.06	8.9139	7.60738	499.716	535.844	400.745	254.472	208.326	260.381	9.10535	8.70819	8.92815	7.61686	7.52815	7.67714
ASHGA5P053832	0.00576876	0.031088	2.18805	up	protein_coding	NM_001270601		ASCL5	RefSeq	1420	chr1	-	201083080	201084500		CTGGCATTGATCGGGCCTGTGGCCGCCCCCGGCTTGGAGGATGATCCGCCGGCCCCGTCC	647219		GO:0003674|GO:0003677|GO:0005575|GO:0005634|GO:0006351|GO:0006355|GO:0008150|GO:0046983	achaete-scute homolog 5	74.4963	55.1916	6.48618	5.35654	79.7908	74.6843	69.0136	66.2092	51.7208	47.6447	6.6882	6.1531	6.61723	5.56476	5.37605	5.1288
ASHGA5P012249	0.00419988	0.0258427	2.58683	up	protein_coding	NM_007028	CCDS34374.1	TRIM31	RefSeq	2049	chr6	-	30070673	30080867		ATCAAAGTCGTCTTGTGCAGAAGTGAAGAGTTTCAGTTTCTCAACCCAACCCCTGTTCCT	11074	Hs.493275	GO:0005739|GO:0008270|GO:0016567|GO:0016874	E3 ubiquitin-protein ligase TRIM31	38.7362	26.7738	5.62681	4.25562	32.9691	38.5766	44.6631	26.5283	27.782	26.0112	5.52991	5.30331	6.04721	4.16112	4.40997	4.19578
ASHGA5P004446	0.000344318	0.00715176	3.75283	up	protein_coding	NM_000497	CCDS6392.1	CYP11B1	RefSeq	3551	chr8	-	143953772	143961236	NM_001026213	AACTAGGGCCCATTTTCAGGTACGACTTGGGAGGAGCAGGCATGGTGTGTGTGATGCTGC	1584	Hs.184927	GO:0004507|GO:0004507|GO:0005506|GO:0005739|GO:0005743|GO:0005743|GO:0006700|GO:0006704|GO:0006705|GO:0006805|GO:0006950|GO:0006955|GO:0008202|GO:0008217|GO:0009055|GO:0020037|GO:0032342|GO:0032342|GO:0032870|GO:0034651|GO:0034651|GO:0035865|GO:0042593|GO:0044281	cytochrome P450 11B1, mitochondrial isoform 1 precursor	122.288	50.0342	7.12978	5.22181	108.34	134.16	124.365	53.1132	51.1809	45.8086	7.10625	6.88881	7.39429	5.23337	5.35912	5.07292
ASHGA5P037440	0.00589916	0.0314895	2.04116	up	protein_coding	NM_181616	CCDS13604.1	KRTAP20-2	RefSeq	198	chr21	+	32007582	32007780		GGATATGGCTGCTGCCGCCCATCTTGCTATGGAAGATACTGGTCCTGTGGCTTCTACTGA	337976	Hs.553698	GO:0005882	keratin-associated protein 20-2	451.912	274.697	8.84014	7.81075	519.621	468.917	367.2	285.469	275.668	262.956	9.15746	8.54473	8.81822	7.79209	7.94941	7.69075
ASHGA5P033198	8.88859e-06	0.00200086	16.467	up	protein_coding	NM_002507	CCDS11549.1	NGFR	RefSeq	3420	chr17	+	47572654	47592382		GCAGGTGCCACCGGCCGCGCCATGGACGGGCCGCGCCTGCTGCTGTTGCTGCTTCTGGGG	4804	Hs.415768	GO:0004871|GO:0004872|GO:0004888|GO:0005035|GO:0005515|GO:0005576|GO:0005654|GO:0005768|GO:0005829|GO:0005886|GO:0005887|GO:0006915|GO:0007411|GO:0007417|GO:0008624|GO:0009611|GO:0009986|GO:0010468|GO:0016048|GO:0021675|GO:0031069|GO:0031293|GO:0031625|GO:0040037|GO:0042488|GO:0043588|GO:0045786|GO:0048011|GO:0048146|GO:0048406|GO:0048635|GO:0050770|GO:0050771|GO:0050772|GO:0051799	tumor necrosis factor receptor superfamily member 16 precursor	3276.84	238.95	11.6404	7.59893	3027.27	3506.97	3296.28	248.755	226.958	241.137	11.5943	11.4279	11.8992	7.57992	7.65821	7.55864
ASHGA5P006881	0.0140652	0.0541784	2.07366	up	protein_coding	NM_015567	CCDS9465.1	SLITRK5	RefSeq	4461	chr13	+	88324869	88331870		GTGAGACTGGGAGGTAAAATGCACACTTGCTGCCCCCCAGTAACTTTGGAACAGGACCTT	26050	Hs.591208	GO:0007409|GO:0016021	SLIT and NTRK-like protein 5 precursor	635.736	366.23	9.29751	8.24533	717.566	583.361	606.281	361.158	380.873	356.658	9.59172	8.83132	9.46948	8.15515	8.42621	8.15462
ASHGA5P001867	0.000583263	0.00924488	2.81168	up	protein_coding	NM_013258	CCDS10708.1	PYCARD	RefSeq	782	chr16	-	31212806	31214097		ACGCACCAGGGCTCTGGAGCCGCGCCAGCTGGGATCCAGGCCCCTCCTCAGTCGGCAGCC	29108	Hs.499094	GO:0004197|GO:0005515|GO:0005737|GO:0005737|GO:0005739|GO:0005829|GO:0006508|GO:0006917|GO:0006919|GO:0007165|GO:0008385|GO:0008385|GO:0008656|GO:0010803|GO:0032088|GO:0032090|GO:0032688|GO:0033209|GO:0035872|GO:0042771|GO:0042803|GO:0043065|GO:0043124|GO:0043280|GO:0044444|GO:0045087|GO:0050718|GO:0051092|GO:0071222|GO:0071347|GO:0071356|GO:0071901|GO:0072332|GO:0090200|GO:2001056|GO:2001238|GO:…	apoptosis-associated speck-like protein containing a CARD isoform a	183.727	92.4659	7.64677	6.15533	181.034	202.187	167.96	89.598	82.4634	105.336	7.75814	7.40221	7.77996	6.03513	6.10494	6.32594
ASHGA5P053609	0.00258656	0.0200056	2.1611	up	protein_coding	NM_024531	CCDS6423.1	SLC52A2	RefSeq	1900	chr8	+	145582275	145584948	NM_001253815, NM_001253816	CGCCCGTCCGGTGCTGACCCACCTGCTGGTGGCTCTCTTCGGCATGGGCTCCTGGGCTGC	79581	Hs.6459	GO:0005887|GO:0032217|GO:0032218	solute carrier family 52, riboflavin transporter, member 2	228.584	144.338	7.93549	6.82373	233.759	237.933	214.06	154.784	122.4	155.831	8.09238	7.62726	8.08684	6.86211	6.70298	6.90608
ASHGA5P003874	0.00446831	0.0267256	2.34724	up	protein_coding	NM_020238	CCDS31582.1	INCENP	RefSeq	4134	chr11	+	61891444	61920635		ATGAAGTCCTTTATTAAGCGCAACACTCCCCTGCGCATGGACCCCAAGGAGAAGGAGCGG	3619	Hs.142179	GO:0000087|GO:0000236|GO:0000278|GO:0000775|GO:0000776|GO:0000777|GO:0000801|GO:0000910|GO:0005515|GO:0005721|GO:0005819|GO:0005829|GO:0005874|GO:0007059|GO:0030496|GO:0043234	inner centromere protein isoform 2	269.44	153.541	8.15584	6.92488	289.66	265.062	253.599	168.822	152.636	139.164	8.38082	7.77614	8.31058	6.99257	7.04455	6.73751
ASHGA5P002067	0.00194085	0.0169057	2.79038	up	protein_coding	ENST00000252530	CCDS42562.1	FAM98C	GENCODE	1275	chr19	+	38893774	38899728		AGGAGTTGCATGCTAAGATCTCAGAGCTGCAGCCTTCTCTGCCCCCAGGGTCCCTGCAGC	147965	Hs.355162		family with sequence similarity 98, member C [Source:HGNC Symbol;Acc:27119]	471.515	212.826	8.90425	7.42379	498.222	471.832	444.491	224.593	219.019	194.865	9.09914	8.5524	9.06122	7.42394	7.60414	7.24329
ASHGA5P051305	0.00107579	0.0124187	2.16017	up	protein_coding	NM_145641	CCDS13924.1	APOL3	RefSeq	3654	chr22	-	36536370	36562225	NM_145640, NM_145642, NR_027833, NR_027834, NR_027835	ATCCATGCCATACCCACTGACCCCAGACCAGTGCAGCCAGCAGGGGAGGTGAGCCATACA	80833	Hs.474737	GO:0004871|GO:0005319|GO:0005575|GO:0005576|GO:0005737|GO:0006954|GO:0007165|GO:0008289|GO:0042157|GO:0043123	apolipoprotein L3 isoform 3	1968.91	1057.72	10.9298	9.81863	1980.7	2148.46	1777.57	995.008	1070.99	1107.15	11.038	10.7129	11.0385	9.68017	9.93518	9.84053
ASHGA5P048586	0.00111815	0.0126841	2.65248	up	protein_coding	NM_021912	CCDS10018.1	GABRB3	RefSeq	5733	chr15	-	26788693	27018935		AGCGGATCCCAGCAGGTTAGGCCGGAGGAACAGCGCCATGTGCTCCGGGCTCCTGGAGCT	2562	Hs.302352	GO:0004890|GO:0005230|GO:0005254|GO:0005886|GO:0005887|GO:0006810|GO:0007165|GO:0007268|GO:0030054|GO:0034220|GO:0034707|GO:0045211|GO:0055085	gamma-aminobutyric acid receptor subunit beta-3 isoform 2 precursor	14.5336	10.9074	4.29769	2.89035	12.2403	20.1756	11.1848	14.1673	8.50184	10.0532	4.2207	4.45884	4.21353	3.18195	2.70329	2.7858
ASHGA5P009481	0.00167162	0.0155573	4.91942	up	protein_coding	NM_057169	CCDS9138.1	GIT2	RefSeq	5643	chr12	-	110367606	110434194		TCCCCGCGCACATCGGGAGGAGTGCACTTGTGACCTCCTCTTCATCTCTGCCTTCCTTCC	9815	Hs.434996	GO:0005515|GO:0005654|GO:0008060|GO:0008270|GO:0008277|GO:0032312	ARF GTPase-activating protein GIT2 isoform 1	1414.84	340.984	10.4431	8.14463	1616.14	1194.43	1433.93	346.769	343.902	332.282	10.7574	9.84829	10.7236	8.10259	8.28003	8.05127
ASHGA5P005368	0.0242709	0.0773704	2.34014	up	protein_coding	NM_199439	CCDS8485.1	PRDM10	RefSeq	5903	chr11	-	129769600	129817517		ACAGCTGCAAGTGGTTCAAGTGGCCTCGGTATCTGGGCAGCCGTTGAGTCCCTCAGCCCA	56980	Hs.275086	GO:0003677|GO:0005634|GO:0006351|GO:0006355|GO:0008270	PR domain zinc finger protein 10 isoform 4	28.4205	24.1086	5.23536	4.00877	26.1898	31.1293	27.9424	36.1787	18.9389	17.2081	5.23373	5.0274	5.44496	4.64417	3.8184	3.56374
ASHGA5P051002	0.0058124	0.0312294	2.52441	up	protein_coding	NM_002959	CCDS798.1	SORT1	RefSeq	7034	chr1	-	109852187	109940563		GCGGCGATGGAGCGGCCCTGGGGAGCTGCGGACGGCCTCTCGCGCTGGCCCCATGGCCTC	6272	Hs.485195	GO:0001503|GO:0005737|GO:0005765|GO:0005768|GO:0005769|GO:0005789|GO:0005794|GO:0005886|GO:0005886|GO:0005905|GO:0006895|GO:0006897|GO:0007186|GO:0007218|GO:0008333|GO:0008624|GO:0009986|GO:0010008|GO:0010465|GO:0010468|GO:0014902|GO:0016021|GO:0016023|GO:0016050|GO:0019899|GO:0030136|GO:0030140|GO:0030379|GO:0030425|GO:0031965|GO:0032509|GO:0032580|GO:0032868|GO:0043025|GO:0043066|GO:0046323|GO:…	sortilin isoform 1 preproprotein	43.5131	31.0548	5.77545	4.43951	36.3547	50.6946	43.49	41.6805	23.1461	28.3377	5.6611	5.652	6.01326	4.86121	4.12887	4.32844
ASHGA5P001229	0.0115719	0.0475527	2.23134	up	protein_coding	ENST00000223398	CCDS5569.1	CLIP2	GENCODE	5563	chr7	+	73703804	73820273		GAGACCTGGAGACCCAGACGCAGCTGGAGCACGCGCGCATTGGGGAGCTGGAACAGAGCC	7461	Hs.647018	GO:0016192|GO:0016020|GO:0005881|GO:0005875|GO:0051010|GO:0005515|GO:0008017	CAP-GLY domain containing linker protein 2 [Source:HGNC Symbol;Acc:2586]	16.3741	14.5634	4.43485	3.27695	11.0956	23.6369	14.3898	19.4012	11.9496	12.3395	4.08746	4.66721	4.54989	3.66383	3.10108	3.06592
ASHGA5P033124	0.000568045	0.00910642	2.26185	up	protein_coding	NM_003734	CCDS11444.1	AOC3	RefSeq	4040	chr17	+	41003200	41010140		TTTCAATCAGAATGACCCTTGGGCCCCCACTGTGGATTTCAGTGACTTCATCAACAATGA	8639	Hs.198241	GO:0005261|GO:0005507|GO:0005507|GO:0005509|GO:0005886|GO:0006954|GO:0007155|GO:0008131|GO:0009308|GO:0009308|GO:0009986|GO:0016021|GO:0042803|GO:0046677|GO:0048038|GO:0052593|GO:0052594|GO:0052595|GO:0052596	membrane primary amine oxidase	436.806	243.11	8.8027	7.6252	418.622	484.36	407.435	250.13	234.741	244.458	8.87244	8.5851	8.95057	7.5891	7.70497	7.58154
ASHGA5P030673	1.30485e-05	0.00216313	4.95359	up	protein_coding	NM_001101404	CCDS45315.1	SH2D7	RefSeq	1892	chr15	+	78384926	78396393		CCCCTTCATTCTGCAGAACGGTGCCCTGCCTCCCTGGTTTCATGGATTCATCACCCGCAA	646892	Hs.569511		SH2 domain-containing protein 7	7018.21	1646.96	12.7597	10.4512	6472.93	9023.68	5558.01	1705.09	1639.52	1596.25	12.7083	12.9052	12.6655	10.4364	10.5434	10.3738
ASHGA5P050142	0.000534522	0.00889909	2.04447	up	protein_coding	NM_001145783	CCDS54235.1	MEF2BNB	RefSeq	1515	chr19	-	19292684	19303400		AGGGCCACAGGTAGCTCCTGGGACCGCCCGCCCCCACTGCCACTCCCAGCTGCAAGGACC	729991	Hs.153629	GO:0005515|GO:0007507	protein MEF2BNB isoform 2	4049.12	2285.7	11.9586	10.9268	4140.82	4341.91	3664.62	2306.71	2106.4	2444	12.0677	11.7698	12.0381	10.8801	10.8998	11.0006
ASHGA5P028363	0.00138698	0.0142523	2.28669	up	protein_coding	ENST00000369483	CCDS30814.1	IGSF3	GENCODE	7253	chr1	-	117117030	117210314		CAGATAACTGGGTAGTTAAAGTCCCCCAGCACCACCAGCTCCTGTCCCAAGGCCACTTGG	3321	Hs.171057	GO:0005515	immunoglobulin superfamily, member 3 [Source:HGNC Symbol;Acc:5950]	1211.88	621.675	10.243	9.04977	1259.83	1266.25	1109.56	663.36	577.423	624.243	10.4155	9.94349	10.3701	9.07115	9.05486	9.02329
ASHGA5P004774	0.00241549	0.0191945	2.71323	up	protein_coding	NM_198321	CCDS4325.1	GALNT10	RefSeq	5966	chr5	+	153570294	153800543		TCACACTGTGAAGCCAATGTCAACTGGCTTCCCCCCTTGCTTGACCGCATTGCTCGGAAC	55568	Hs.740431	GO:0000139|GO:0004653|GO:0016021|GO:0016266|GO:0030246|GO:0043687|GO:0044267|GO:0046872	polypeptide N-acetylgalactosaminyltransferase 10	828.708	364.486	9.6761	8.23608	876.746	800.485	808.893	395.556	346.061	351.842	9.87336	9.26747	9.88745	8.29067	8.28754	8.13003
ASHGA5P055464	7.07182e-07	0.00125011	13.5148	up	protein_coding	NM_005811	CCDS8891.1	GDF11	RefSeq	4260	chr12	+	56137063	56146665		TGCTCTTAAGGTGGGGGATAGAGGATGCCTCCCCCACAGACCCTACCCCAAGACCCCTAG	10220	Hs.600883	GO:0001501|GO:0001656|GO:0001657|GO:0005125|GO:0005575|GO:0005615|GO:0007399|GO:0007498|GO:0008083|GO:0008285|GO:0021512|GO:0031016|GO:0040007|GO:0045665|GO:0048469|GO:0048593	growth/differentiation factor 11 precursor	24379.6	2196.96	14.6287	10.8723	26160.7	27244.5	19733.4	2308.13	2000.64	2282.1	14.745	14.6253	14.5159	10.8816	10.8308	10.9044
ASHGA5P049806	0.00118917	0.0130615	2.40872	up	protein_coding	NM_001191031	CCDS54159.1	C17orf72	RefSeq	2894	chr17	+	62075710	62081644	NM_001164257, NM_001191029	CTTCCTGCAGCCCCTCTCGTGGGCCGTCCCACCTGCGCCCCCGCAGCCAGGCCGCGTGAA	92340	Hs.708161		uncharacterized protein C17orf72 isoform 4	2678.66	1277.99	11.3502	10.0819	2801.34	2691.45	2543.2	1399.96	1196.56	1237.47	11.4935	11.054	11.503	10.153	10.0873	10.0054
ASHGA5P050380	0.00235806	0.0189645	2.77495	up	protein_coding	NM_014746	CCDS1657.1	RNF144A	RefSeq	5740	chr2	+	7057522	7184309		ATTTTTGCAGGATTTGGGCTGCTGCTCTTGGTGGCCTCACCTTTCCTACTCCTGGCCACT	9781	Hs.22146	GO:0005794|GO:0008270|GO:0016021|GO:0016567|GO:0016874	probable E3 ubiquitin-protein ligase RNF144A	1207.9	512.995	10.2352	8.76276	1317.24	1175.34	1131.14	522.539	514.879	501.568	10.4788	9.82407	10.4028	8.71742	8.87627	8.69458
ASHGA5P050001	0.0109008	0.046081	4.53287	up	protein_coding	NM_016626	CCDS11951.2	MEX3C	RefSeq	4158	chr18	-	48700919	48724051		CGCCGCCGCGATGCCCAGCGGCAGCTCCGCGGCCCTGGCCCTGGCGGCGGCCCCGGCCCC	51320	Hs.465144	GO:0003723|GO:0005634|GO:0005737|GO:0008270|GO:0016874|GO:0043231	RNA-binding protein MEX3C	87.5775	32.5092	6.68301	4.50258	109.39	65.7865	87.556	26.9572	45.3123	25.258	7.1201	5.98978	6.93914	4.18531	5.17423	4.1482
ASHGA5P010260	0.0322355	0.0938096	2.47766	up	protein_coding	ENST00000360409	CCDS2364.1	NRP2	GENCODE	6662	chr2	+	206547223	206662857		CTCGGCTTTTGCAGGTGAGAATTTTAAAGTGGACATCCCAGAAATACATGAGAGAGAAGG	8828	Hs.471200	GO:0007411|GO:0007507|GO:0001525|GO:0007155|GO:0001755|GO:0001938|GO:0071526|GO:0050919|GO:0048010|GO:0010595|GO:0038084|GO:0016021|GO:0005886|GO:0030424|GO:0016020|GO:0005624|GO:0002116|GO:0004872|GO:0046872|GO:0017154|GO:0019955|GO:0008201|GO:0019838|GO:0005021	neuropilin 2 [Source:HGNC Symbol;Acc:8005]	364.681	195.484	8.48292	7.17395	279.926	550.345	263.771	187.223	108.702	290.528	8.33826	8.74986	8.36064	7.15303	6.52002	7.84879
ASHGA5P019350	0.00014862	0.00497164	2.53907	up	protein_coding	NM_002571	CCDS35173.1	PAEP	RefSeq	828	chr9	+	138453603	138458622		CCGTTTCTAGCTCACCTCCGCCTCCAGGAAGACCAGACTCCCACCCTTCCACACCTCCAG	5047	Hs.532325	GO:0005576|GO:0006810|GO:0007275|GO:0036094	glycodelin precursor	3998.48	1819.55	11.9355	10.5912	4262.67	4386.25	3346.53	1955.29	1696.85	1806.52	12.1026	11.7846	11.9194	10.6346	10.5929	10.5462
ASHGA5P026783	0.000308011	0.00679889	4.4434	up	protein_coding	NM_001242607		NCAM1	RefSeq	6070	chr11	+	112831968	113149158		AACTGGCAAGTGGGCAGACAGAAAGGACAGGCTGGCAGTGCAGGTTTCCCAGGATCTCAT	4684	Hs.503878	GO:0000139|GO:0005576|GO:0005886|GO:0007155|GO:0007411|GO:0009897|GO:0009986|GO:0016021|GO:0019221|GO:0031225|GO:0060333	neural cell adhesion molecule 1 isoform 5 precursor	39.6733	16.7123	5.65918	3.50752	33.1825	46.006	39.8313	20.3993	15.5859	14.1517	5.53869	5.53539	5.90346	3.74466	3.51146	3.26644
ASHGA5P010249	0.000808623	0.0108175	4.39209	up	protein_coding	NM_139049	CCDS7224.1	MAPK8	RefSeq	1412	chr10	+	49609686	49643183	NM_002750	GGAAGGGACTATATTGATCAGTGGAATAAAGTTATTGAACAGCTTGGAACACCATGTCCT	5599	Hs.138211	GO:0002224|GO:0002755|GO:0002756|GO:0004674|GO:0004705|GO:0005515|GO:0005524|GO:0005634|GO:0005654|GO:0005829|GO:0006915|GO:0006950|GO:0007254|GO:0007254|GO:0007258|GO:0008063|GO:0008624|GO:0008633|GO:0009411|GO:0010628|GO:0018105|GO:0018107|GO:0018107|GO:0031063|GO:0032091|GO:0032880|GO:0034130|GO:0034134|GO:0034138|GO:0034142|GO:0035033|GO:0035666|GO:0042826|GO:0043066|GO:0045087|GO:0048011|GO:…	mitogen-activated protein kinase 8 isoform JNK1 alpha2	71.572	26.3324	6.35485	4.21995	46.5528	105.265	62.898	31.5854	25.1748	22.2369	5.98393	6.58202	6.49861	4.43969	4.26487	3.95528
ASHGA5P049625	6.73407e-05	0.00346484	2.55294	up	protein_coding	NM_003738	CCDS516.1	PTCH2	RefSeq	3773	chr1	-	45287937	45308616		GCGGGCTTAGGTGGGGGGCATCCTCCTCCCTGCCCCAGAGCTTTGCCAGAGTGACTACCT	8643	Hs.591497	GO:0005119|GO:0008158|GO:0016021|GO:0042633|GO:0043588|GO:0045879|GO:0097108|GO:0097108	protein patched homolog 2 isoform 1	7180.69	3233.57	12.8074	11.4553	7498.07	7718.42	6325.58	3335.18	3020.42	3345.1	12.9138	12.6628	12.8457	11.4408	11.4228	11.5023
ASHGA5P041776	0.000625361	0.00951488	2.58863	up	protein_coding	NM_030651	CCDS4739.1	PRRT1	RefSeq	1931	chr6	-	32116139	32119720		GGGGCACCCCCACCCGGCTGCGCTACCTTGCCCCGCATGCCACCCGACCCTTACCTGCAG	80863	Hs.699821	GO:0009607|GO:0016021	proline-rich transmembrane protein 1	5072.11	2263.78	12.285	10.9128	5468.64	5154.46	4593.23	2335.69	2214.6	2241.04	12.4753	12.014	12.3657	10.904	10.9564	10.878
ASHGA5P006057	0.000118512	0.00446175	4.65365	up	protein_coding	NM_004240	CCDS12172.1	TRIP10	RefSeq	2029	chr19	+	6739706	6751529		GAAGAACAAGACAGTGGTGACCGAGGATTTTAGCCACTTGCCCCCAGAGCAGCAGCGAAA	9322	Hs.515094	GO:0001891|GO:0005737|GO:0005764|GO:0005794|GO:0005829|GO:0005856|GO:0005938|GO:0006897|GO:0007154|GO:0007165|GO:0007264|GO:0008289|GO:0030036|GO:0042802|GO:0042995|GO:0048471|GO:0051056	cdc42-interacting protein 4	677.241	180.189	9.38537	7.167	729.603	724.875	577.245	180.283	162.355	197.929	9.61398	9.13179	9.41033	7.08993	7.14597	7.2651
ASHGA5P002531	0.00613727	0.0323117	2.76991	up	protein_coding	NM_000104	CCDS1793.1	CYP1B1	RefSeq	5160	chr2	-	38294745	38303323		CTCCCCGCAGCATGGGCACCAGCCTCAGCCCGAACGACCCTTGGCCGCTAAACCCGCTGT	1545	Hs.154654	GO:0001525|GO:0004497|GO:0005506|GO:0005789|GO:0006725|GO:0006805|GO:0007601|GO:0008210|GO:0009055|GO:0009404|GO:0009636|GO:0010033|GO:0016712|GO:0019825|GO:0020037|GO:0043542|GO:0044281|GO:0055114|GO:0061298|GO:0070330|GO:0071603	cytochrome P450 1B1	486.912	210.795	8.87106	7.40122	558.125	621.38	281.231	240.99	214.533	176.861	9.25046	8.91432	8.4484	7.53007	7.57578	7.09782
ASHGA5P001501	0.0369538	0.102657	6.88146	up	protein_coding	NM_002242	CCDS2498.1	KCNJ13	RefSeq	3609	chr2	-	233630511	233641275	NM_001172416	CAAAAGAACTGAGAAATACAGCCTGAGATGGACAGCAGTAATTGCAAAGTTATTGCTCCT	3769	Hs.467338	GO:0005242|GO:0006813|GO:0008076	inward rectifier potassium channel 13 isoform 1	47.9401	5	5.12604	2.34333	25.3671	111.884	6.56889	5	5	5	5.18873	6.65894	3.53046	2.34074	2.34646	2.34278
ASHGA5P003421	0.00109265	0.0124956	7.6353	up	protein_coding	NM_033238	CCDS10255.1	PML	RefSeq	5600	chr15	+	74287013	74340155		TTTCTTTGACCTCAAGATTGACAATGAAACCCAGAAGATTAGCCAGCTGGCTGCGGTGAA	5371	Hs.526464	GO:0001666|GO:0001932|GO:0002230|GO:0003677|GO:0003713|GO:0005515|GO:0005634|GO:0005654|GO:0005654|GO:0005730|GO:0005730|GO:0005737|GO:0005829|GO:0006351|GO:0006461|GO:0006605|GO:0006605|GO:0006917|GO:0006917|GO:0006919|GO:0006977|GO:0007050|GO:0007050|GO:0007179|GO:0007182|GO:0007184|GO:0007569|GO:0008270|GO:0008270|GO:0008285|GO:0008630|GO:0009411|GO:0009615|GO:0010332|GO:0010522|GO:0016363|GO:…	protein PML isoform 1	46.3477	9.10541	5.66083	2.72815	25.0911	84.784	29.168	11.6566	8.20647	7.45315	5.17365	6.30476	5.50408	2.90921	2.67841	2.59683
ASHGA5P051960	0.000851966	0.0111059	4.49769	up	protein_coding	NM_000406	CCDS3517.1	GNRHR	RefSeq	5843	chr4	-	68603098	68621804		GGTGGCATCAAGCATTTTATAACTTTTTCACCTTCAGCTGCCTCTTCATCATCCCTCTTT	2798	Hs.407587	GO:0004968|GO:0005886|GO:0005887|GO:0007186|GO:0007275|GO:0008285|GO:0016020|GO:0016520|GO:0097211	gonadotropin-releasing hormone receptor isoform 1	1763.3	458.667	10.7607	8.59155	2052.22	1627.13	1610.56	481.605	454.957	439.438	11.0811	10.303	10.8981	8.5968	8.68695	8.4909
ASHGA5P014213	0.000173853	0.00525858	3.52942	up	protein_coding	NM_001130965	CCDS47525.1	SUN1	RefSeq	3977	chr7	+	872141	914557		GAGAGTTTATTCTAGGGACAGGAATCAAAAATGTTACTTCTTGCTGCAGATTCTGCGCAG	23353	Hs.438072	GO:0005515|GO:0005635|GO:0005637|GO:0006998|GO:0016021|GO:0031965|GO:0034993|GO:0043231|GO:0090286|GO:0090292	SUN domain-containing protein 1 isoform a	38.2137	19.2599	5.55774	3.7383	35.1642	53.9013	25.5757	20.382	16.9056	20.492	5.61471	5.73443	5.32407	3.7432	3.63645	3.83526
ASHGA5P002044	3.03543e-05	0.00269605	2.15986	up	protein_coding	ENST00000252087	CCDS4263.1	PCDHGC5	GENCODE	4641	chr5	+	140868807	140892546		GCGGAGCCAGCAAGCCCCGCCCAACACGGACTGGCGTTTCTCTCAGGCCCAGAGACCCGG	56097		GO:0007156|GO:0016021|GO:0005886|GO:0016020|GO:0005509	protocadherin gamma subfamily C, 5 [Source:HGNC Symbol;Acc:8718]	86.6425	62.1532	6.66271	5.55177	79.4967	106.496	73.9348	65.4172	60.6748	60.3676	6.68444	6.59407	6.70962	5.5475	5.62235	5.48545
ASHGA5P052643	2.484e-05	0.00255615	5.56266	up	protein_coding	ENST00000274853	CCDS43444.1	PPP1R18	GENCODE	4599	chr6	-	30644165	30655672		CTGTCCCCAGTGCTCCCTACCCTCACCTCAAGACGACCATGGCCACCATCCCAGACTGGA	170954	Hs.101150	GO:0005737|GO:0005856|GO:0003779|GO:0019902	protein phosphatase 1, regulatory subunit 18 [Source:HGNC Symbol;Acc:29413]	27957.4	6071.72	14.8325	12.3567	27768.3	34615.7	21488.2	6543.79	6026.38	5644.99	14.8339	15.0053	14.6582	12.4174	12.3954	12.2572
ASHGA5P054480	0.00100587	0.0120437	2.44587	up	protein_coding	NM_001083116	CCDS7305.1	PRF1	RefSeq	2555	chr10	-	72357103	72362531		GTCTCTGCAGCTCCATGGCAGCCCGTCTGCTCCTCCTGGGCATCCTTCTCCTGCTGCTGC	5551	Hs.2200	GO:0002357|GO:0002418|GO:0005509|GO:0005515|GO:0005576|GO:0005886|GO:0006915|GO:0006968|GO:0007623|GO:0016021|GO:0016023|GO:0019835|GO:0022829|GO:0031904|GO:0044194|GO:0045471|GO:0051260|GO:0051607	perforin-1 precursor	1250.62	602.129	10.2932	9.00282	1261.82	1337.98	1152.05	659.793	589.744	556.851	10.4176	10.0336	10.4283	9.06203	9.09315	8.85328
ASHGA5P027470	0.00190709	0.0167326	2.66692	up	protein_coding	NM_005447	CCDS44950.1	RASSF9	RefSeq	1796	chr12	-	86198330	86230318		TTCTTTATTCGTTTGCCCGACAGACCATGGCTCCCTTTGGAAGAAACTTGCTAAAGACTC	9182	Hs.527881	GO:0005215|GO:0005515|GO:0005768|GO:0005829|GO:0006605|GO:0007165|GO:0012510|GO:0016197	ras association domain-containing protein 9	286.534	144.113	8.23724	6.82206	309.145	285.373	265.085	162.541	122.2	147.598	8.46596	7.8771	8.36864	6.93734	6.69928	6.82956
ASHGA5P005546	0.00024402	0.00612942	2.70265	up	protein_coding	NM_022908	CCDS2858.1	NT5DC2	RefSeq	2105	chr3	-	52558384	52569093		GAGTTGACGGACCTCCTGCCCCCCGAGGTCTGCAGTCTCCTGAACCCAGCAGCCATCTAC	64943	Hs.84753	GO:0016787|GO:0046872	5'-nucleotidase domain-containing protein 2 isoform 2	2951.96	1242.32	11.4793	10.045	3171.25	3130.96	2553.69	1325.74	1160.5	1240.72	11.6599	11.2687	11.5094	10.081	10.0445	10.0094
ASHGA5P031600	0.00225619	0.0184945	3.72656	up	protein_coding	ENST00000388956	CCDS53994.1	OTOA	GENCODE	3466	chr16	+	21695749	21772050		AACTTCCTGGACAAAGGCCAGCTGCTGCTGATGGGAAACTCAATCACCTACAGGGACCAG	146183	Hs.408336	GO:0007605|GO:0005578|GO:0016324|GO:0031225	otoancorin [Source:HGNC Symbol;Acc:16378]	33.0775	17.2985	5.43038	3.53253	29.5572	37.0567	32.6186	23.7849	15.0673	13.0432	5.38656	5.25259	5.652	3.99176	3.45927	3.14657
ASHGA5P002235	0.00821638	0.0384853	3.41556	up	protein_coding	NM_001024938	CCDS46673.1	SLC2A11	RefSeq	2292	chr22	+	24199058	24227725		TCCGAAGACTGATTCAGGGCAGGATCCTGCTCCTGACCATCTGCGCTGCCGGCATTGGTG	66035	Hs.632772	GO:0005886|GO:0008643|GO:0016021|GO:0022891|GO:0055085	solute carrier family 2, facilitated glucose transporter member 11 isoform c	16.5185	8.97658	4.48424	2.71212	13.8367	13.4666	22.2523	11.124	6.05776	9.74798	4.38014	3.93318	5.13941	2.84553	2.5362	2.75463
ASHGA5P007769	0.000632944	0.00953165	4.47449	up	protein_coding	NM_201557	CCDS2070.1	FHL2	RefSeq	1727	chr2	-	105977282	106055230		ACAGAAGACAGAACCCTAAAACCACAGGTTGCTGAAAAGCCAGGAGTCAAAATGACTGAG	2274	Hs.443687	GO:0000122|GO:0001649|GO:0003713|GO:0005515|GO:0005634|GO:0005654|GO:0005925|GO:0006351|GO:0008134|GO:0008270|GO:0009725|GO:0015629|GO:0030018|GO:0030521|GO:0031430|GO:0042802|GO:0043066|GO:0044255|GO:0044281|GO:0045893|GO:0050681|GO:0055014|GO:0055015|GO:0060347	four and a half LIM domains protein 2	18.8009	5.58393	4.57497	2.41325	13.3742	30.3363	12.6921	5	5	6.75179	4.33399	4.99707	4.39386	2.34074	2.34646	2.55254
ASHGA5P006809	0.0021811	0.0181283	2.17305	up	protein_coding	NM_030765	CCDS9227.1	B3GNT4	RefSeq	1554	chr12	+	122688227	122692084		TTTACCAAAGGGACCGGCGATGCTCTGCAGGCTGTGCTGGCTGGTCTCGTACAGCTTGGC	79369	Hs.363315	GO:0000139|GO:0005975|GO:0008378|GO:0016021|GO:0016266|GO:0018146|GO:0030203|GO:0042339|GO:0043687|GO:0044267|GO:0044281	UDP-GlcNAc:betaGal beta-1,3-N-acetylglucosaminyltransferase 4	41.0729	33.3798	5.71353	4.59381	37.1063	43.7952	42.3173	35.7696	28.8751	35.4946	5.68772	5.47362	5.97926	4.62892	4.47036	4.68216
ASHGA5P030208	0.00389213	0.024789	3.36119	up	protein_coding	NM_001717	CCDS10324.1	BNC1	RefSeq	4627	chr15	-	83924654	83953468		CTGGGCGCTTGGGGAGCCGCCCACTTCGCCGGGTCGCGCCCCGACGGCCGGAGCGTGGAT	646	Hs.459153	GO:0003677|GO:0003700|GO:0005634|GO:0005737|GO:0006351|GO:0006356|GO:0006357|GO:0008270|GO:0008284|GO:0008544|GO:0042060|GO:0050679|GO:0051276	zinc finger protein basonuclin-1	14.8616	7.20921	4.31682	2.56785	19.3978	15.9442	9.24276	5	9.19532	7.4323	4.83324	4.15468	3.96255	2.34074	2.76699	2.59582
ASHGA5P026920	0.000259902	0.0062754	3.96666	up	protein_coding	NM_021978	CCDS8487.1	ST14	RefSeq	3319	chr11	+	130029681	130080257		AAATGAGAATTTTGTGGATGCCTACGAGAACTCCAACTCCACTGAGTTTGTAAGCCTGGC	6768	Hs.504315	GO:0004252|GO:0005615|GO:0005886|GO:0005887|GO:0006508|GO:0008236|GO:0016323|GO:0019897	suppressor of tumorigenicity 14 protein	83.5656	32.6653	6.54554	4.55762	64.8796	127.862	57.9548	35.4215	27.5792	34.9952	6.42132	6.82823	6.38707	4.6148	4.39827	4.65977
ASHGA5P011213	0.00606902	0.0320824	3.49029	up	protein_coding	NM_024541	CCDS41563.1	C10orf76	RefSeq	4101	chr10	-	103605355	103815932		ATCGTGGATGATGAGGCCACACTCAATGGAATGGGACTTGTAATTGCTCAGGCTTTATCT	79591	Hs.16004	GO:0016021	UPF0668 protein C10orf76	37.8069	18.6502	5.48709	3.68374	20.2335	58.4843	34.7029	19.0711	21.0038	15.8756	4.88981	5.84087	5.73058	3.63818	3.97963	3.43341
ASHGA5P036115	0.00210522	0.0177502	4.63365	up	protein_coding	NM_001178017	CCDS54391.1	DBI	RefSeq	789	chr2	+	120124828	120130122		ATGGAGAGATGGGGGAAGGGGTTGCACGGATTGGAGGAGCGAGGAGACTCAGTCCCCATC	1622	Hs.78888	GO:0000062|GO:0001942|GO:0005739|GO:0005783|GO:0005794|GO:0006641|GO:0006810|GO:0008289|GO:0030156|GO:0043588	acyl-CoA-binding protein isoform 4	33.153	14.0056	5.42953	3.21738	32.5308	37.9999	28.9283	14.9237	8.08279	19.0103	5.51255	5.2832	5.49285	3.26658	2.66815	3.71742
ASHGA5P005022	0.000661691	0.00975385	2.07517	up	protein_coding	NM_006076	CCDS5697.1	AGFG2	RefSeq	4821	chr7	+	100136833	100165843		AGTTTCTCCAGGAAAAATATGAGAAGAAGAGATGGTATGTCCCCCCAGACCAAGTCAAGG	3268	Hs.521083	GO:0003674|GO:0005575|GO:0008060|GO:0008150|GO:0008270|GO:0032312	arf-GAP domain and FG repeat-containing protein 2	447.11	268.401	8.82876	7.77553	457.868	499.246	384.216	279.993	252.582	272.63	8.98854	8.62312	8.87461	7.76012	7.816	7.75047
ASHGA5P002109	0.000230581	0.00597464	5.43023	up	protein_coding	NM_005629	CCDS14726.1	SLC6A8	RefSeq	3580	chrX	+	152953751	152962048	NM_001142805	AAGAACGGCGGAGGTGTGTTCCTTATTCCCTACGTCCTGATCGCCCTGGTTGGAGGAATC	6535	Hs.540696	GO:0003674|GO:0005308|GO:0005309|GO:0005328|GO:0005575|GO:0005886|GO:0005887|GO:0006600|GO:0006810|GO:0006936|GO:0008150|GO:0015881|GO:0016021|GO:0034641|GO:0044281	sodium- and chloride-dependent creatine transporter 1 isoform 1	651.554	150.685	9.33424	6.89323	561.368	693.81	699.483	171.041	140.842	140.17	9.2592	9.06964	9.67388	7.01213	6.91771	6.74983
ASHGA5P008668	0.0269167	0.0830009	2.05025	up	protein_coding	NM_003152	CCDS11424.1	STAT5A	RefSeq	4314	chr17	+	40439564	40463960		AATGAACAGAGGCTGGTCCGAGAAGCCAACAATTGCAGCTCTCCGGCTGGGATCCTGGTT	6776	Hs.437058	GO:0000255|GO:0000979|GO:0001553|GO:0001779|GO:0003690|GO:0003700|GO:0004871|GO:0005509|GO:0005515|GO:0005634|GO:0005654|GO:0005730|GO:0005737|GO:0005829|GO:0006101|GO:0006103|GO:0006105|GO:0006107|GO:0006357|GO:0006366|GO:0006549|GO:0006573|GO:0006600|GO:0006631|GO:0007259|GO:0007565|GO:0007595|GO:0018108|GO:0019218|GO:0019221|GO:0019530|GO:0019915|GO:0030155|GO:0030856|GO:0031667|GO:0032825|GO:…	signal transducer and activator of transcription 5A	18.6625	18.1377	4.66062	3.62482	14.7911	21.9535	19.2427	13.3691	20.3641	20.6798	4.47237	4.56612	4.94336	3.09277	3.93105	3.85063
ASHGA5P008402	0.00383082	0.0247043	2.25632	up	protein_coding	NM_138360	CCDS32054.1	LRRC16B	RefSeq	4615	chr14	+	24521205	24538937		CCGGAAGATGGGCACTGAGGGGTCAGAGCCAGGGGAGGGGGGCCCAGCCCCTGGGACAGC	90668	Hs.26135	GO:0005737	leucine-rich repeat-containing protein 16B	24.2365	20.526	5.00793	3.83396	27.8035	26.1051	18.801	18.7862	19.6199	23.1719	5.31047	4.80344	4.90988	3.61149	3.87159	4.01879
ASHGA5P001634	0.0073165	0.0358769	2.11858	up	protein_coding	NM_001144984	CCDS53863.1	CCDC169	RefSeq	900	chr13	-	36801178	36871992	NM_001198910	GGAAAAAATCCATGGAAACTCTTCAGGAATCCTTAAACACATTACTTAAACAGCTAGAAG	728591	Hs.730899		coiled-coil domain-containing protein 169 isoform c	53.172	42.8082	6.04696	4.96386	47.2714	57.6162	54.6284	53.0115	40.0347	35.3786	6.00519	5.82086	6.31483	5.22981	4.98439	4.67739
ASHGA5P007976	0.000220135	0.00583697	3.49406	up	protein_coding	NM_031925		TMEM120A	RefSeq	1497	chr7	-	75616154	75623992		AGGAGTGGCAGGTGCTTATGTGCGGCTTTCCCTTCCTCCTCCTTTTCCTCGGCAATTTCT	83862	Hs.488835	GO:0003674|GO:0005575|GO:0008150|GO:0016021	transmembrane protein 120A	11954.1	3942.53	13.5357	11.7308	11984.2	12594	11284	3896.78	3357.89	4572.92	13.5612	13.3741	13.6717	11.6707	11.5735	11.9481
[truncated: 1,347 more rows]
