# Supplementary material for: Investigation of TGFβ1-Induced Long Noncoding RNAs in Endothelial Cells
Source: Int J Vasc Med. 2016 Apr 10;2016:2459687. doi: 10.1155/2016/2459687 (PMC4842052; doi:10.1155/2016/2459687)
Supplement: Supplementary file 1 — Quality Assessment of RNA Samples and Data Analysis. RNA integrity and genomic DNA contamination were evaluated by denaturing agarose gel electrophoresis. In all of the samples, the intensity of the upper 28S ribosomal RNA band was about twice that of the lower 18S band thereby confirming the integrity of the RNA studied. The absence of smears above the 28S band attests to the purity of the RNA samples. RNA quantity and purity were also assessed with the NanoDrop ND-1000. The combination of optical density (OD) A260/A280 ratios that were close to 2.0 and A260/A230 ratios that exceeded 1.8 further confirmed the purity of the RNA used. The Box Plot is a well accepted means to quickly visualize the distribution of a dataset. Our Box plots (10th, 90th percentile) showed comparable distributions of expression values after normalization. Hierarchical clustering is a widely used method for analysis of gene expression. Cluster analysis groups samples based on their expression levels with dendrograms summarize the arrangement of said clusters. The supplementary tables report the fold change, P value, false discovery rate, annotations, and raw and normalized intensities for differentially expressed and up-/down-regulated lncRNAs and mRNAs in TGFβ1-treated HUVECs relative to control HUVECs. [file 2459687.f1.zip › Supplement Table D-mRNA_DOWN_TGFb1-treated_vs_Controlsample.xlsx]

## Sheet: Sheet1
# Fold Change cut-off: 2.0 # P-value cut-off: 0.05 # Condition pairs: TGFb1-treated_vs_Controlsample # Column A: ProbeName it represents probe name. # Column B: P-value, P-value calculated from unpaired t-test. # Column C: FDR, FDR is calculated from Benjamini Hochberg FDR. # Column D: FC (abs), the absolute ratio (no log scale) of normalized intensities between two conditions. # Column E: Regula…
TGFb1-treated_vs_Controlsample 2.0 fold down regulated mRNAs
	P-value and FDR		Fold change and Regulation		Annotations																Group--Raw Intensity		Group--Normalized Intensity		Raw Intensity						Normalized Intensity
ProbeName	P-value	FDR	FC (abs)	Regulation	type	seqname	ccdsID	GeneSymbol	source	RNAlength	chrom	strand	txStart	txEnd	Xhyb	Sequence	EntrezID	Unigene	GO	product	group-TGFb1-treated(raw)	group-Controlsample(raw)	group-TGFb1-treated(normalized)	group-Controlsample(normalized)	[10, TGFb1-treated](raw)	[11, TGFb1-treated](raw)	[12, TGFb1-treated](raw)	[1, Controlsample](raw)	[2, Controlsample](raw)	[3, Controlsample](raw)	[10, TGFb1-treated](normalized)	[11, TGFb1-treated](normalized)	[12, TGFb1-treated](normalized)	[1, Controlsample](normalized)	[2, Controlsample](normalized)	[3, Controlsample](normalized)
ASHGA5P005374	0.00299386	0.0216315	3.97216	down	protein_coding	NM_153211	CCDS32804.1	TTC39C	RefSeq	4900	chr18	+	21572736	21715574		CTTCTTTTGTGAAATCATAGCCCACTAATGAGTTTTGGAGCCAGCTTTGTCAGTTTTTTG	125488	Hs.128576		tetratricopeptide repeat protein 39C isoform 2	6.24498	37.0856	2.77506	4.76498	5	8.73494	5	36.5648	39.4851	35.2069	2.46913	3.36009	2.49594	4.66112	4.96388	4.66993
ASHGA5P039175	8.39767e-06	0.00199656	2.86917	down	protein_coding	NM_001013439	CCDS33894.1	FXR1	RefSeq	8911	chr3	+	180630233	180700539	NM_005087	TCTCAGAGCAGACAAAGAAACCTCCCAAGGGAAACTTTGGCTAAAAACAAGAAAGAAATG	8087	Hs.478407	GO:0003723|GO:0005730|GO:0005737|GO:0005844|GO:0006915|GO:0007517|GO:0030154	fragile X mental retardation syndrome-related protein 1 isoform c	5260.16	16690.2	12.3306	13.8512	5193.46	6152.02	4435.01	18078	16300	15692.4	12.4011	12.2884	12.3022	13.9282	13.8083	13.8171
ASHGA5P049406	0.00882772	0.0404339	2.8422	down	protein_coding	NM_130766	CCDS11005.1	INPP5K	RefSeq	3232	chr17	-	1397870	1420182	NM_001135642, NM_016532	TGAAGCACAGCCACAGATCTGAGCCAGGATGGGAGTGAATCCCAGGCGGAGGCCAGAGCT	51763	Hs.632238	GO:0001701|GO:0001726|GO:0001933|GO:0004445|GO:0005000|GO:0005515|GO:0005634|GO:0005737|GO:0005783|GO:0005802|GO:0005829|GO:0005829|GO:0005886|GO:0005979|GO:0006469|GO:0006644|GO:0006661|GO:0007186|GO:0010801|GO:0010829|GO:0016020|GO:0016311|GO:0016311|GO:0016312|GO:0030036|GO:0032587|GO:0032869|GO:0032870|GO:0033137|GO:0034485|GO:0034594|GO:0034595|GO:0035305|GO:0035810|GO:0042577|GO:0042593|GO:…	inositol polyphosphate 5-phosphatase K isoform 2	155.552	582.421	7.37094	8.87795	138.939	225.077	102.638	486.133	419.426	841.705	7.42763	7.55013	7.13506	8.61188	8.56307	9.4589
ASHGA5P049426	0.0130751	0.0516363	2.11729	down	protein_coding	NM_031965	CCDS11036.1	GSG2	RefSeq	2797	chr17	+	3627196	3629992		GCGTTTGAACCTCTTGGCGGGTGCCGGCCATGGCGGCTTCGCTCCCGGGACCTGGGAGCC	83903	Hs.534059	GO:0003677|GO:0004672|GO:0005524|GO:0005634|GO:0005694|GO:0005737|GO:0005813|GO:0005819|GO:0006468|GO:0007064|GO:0007243|GO:0031965|GO:0043231|GO:0071459|GO:0072354|GO:0072355|GO:0090231	serine/threonine-protein kinase haspin	5	17.1214	2.45604	3.53826	5	5	5	12.7786	18.4322	20.1535	2.46913	2.40305	2.49594	3.03328	3.77463	3.80688
ASHGA5P013681	0.0116411	0.047744	2.21339	down	protein_coding	ENST00000395782	CCDS11187.1	PEMT	GENCODE	895	chr17	-	17408876	17480779		CCACTATTGTTTTAATTTGCTTTTACCTGATTCCTGGCAGACTTCTGCGTTATGACCCGG	10400	Hs.731773	GO:0008285|GO:0006629|GO:0008283|GO:0042493|GO:0045471|GO:0006656|GO:0006644|GO:0043200|GO:0046498|GO:0046500|GO:0033273|GO:0050747|GO:0016021|GO:0005789|GO:0005624|GO:0042383|GO:0031966|GO:0031526|GO:0008170|GO:0008429|GO:0004608	phosphatidylethanolamine N-methyltransferase [Source:HGNC Symbol;Acc:8830]	12.2505	48.7914	4.03711	5.18337	13.6626	16.4006	6.68834	46.9557	50.56	48.8585	4.36365	4.19123	3.55647	5.04441	5.34181	5.16389
ASHGA5P047901	0.0228488	0.0742929	2.98725	down	protein_coding	NM_001004461	CCDS31420.1	OR10A6	RefSeq	945	chr11	-	7949264	7950209		TTGTCTTACTCACTTCTGACACCACTGCTGAATCTGCTTATCTACAGTTTGCGAAATAGT	390093	Hs.528593	GO:0004930|GO:0004984|GO:0005886|GO:0016021	olfactory receptor 10A6	19.2908	92.0343	4.56999	6.14881	28.2286	21.0887	8.55513	94.8235	98.3512	82.9284	5.32936	4.51486	3.86577	6.11901	6.36364	5.96379
ASHGA5P002782	0.00538993	0.0297921	2.25388	down	protein_coding	NM_016835	CCDS11501.1	MAPT	RefSeq	6762	chr17	+	43971747	44105699	NM_001123066	CAAAAAAGCCAAGACATCCACACGTTCCTCTGCTAAAACCTTGAAAAATAGGCCTTGCCT	4137	Hs.101174	GO:0000226|GO:0001764|GO:0005200|GO:0005515|GO:0005829|GO:0005874|GO:0005875|GO:0005886|GO:0006915|GO:0006921|GO:0007628|GO:0008017|GO:0008088|GO:0010506|GO:0017124|GO:0019899|GO:0019901|GO:0030424|GO:0030426|GO:0031113|GO:0031116|GO:0032387|GO:0034185|GO:0034399|GO:0035085|GO:0045298|GO:0045773|GO:0047497|GO:0048676|GO:0048699|GO:0060632|GO:0071813	microtubule-associated protein tau isoform 1	22.5884	83.1291	4.8271	5.99951	19.7632	34.7953	13.2067	83.0336	79.2431	87.1106	4.86351	5.1712	4.44659	5.91841	6.04012	6.04
ASHGA5P053062	0.00693892	0.0347468	2.25917	down	protein_coding	NM_021642	CCDS30922.1	FCGR2A	RefSeq	2426	chr1	+	161475204	161489360	NM_001136219	TCTTTTCTAAGCTTGTCTCTTAAAACCCACTGGACGTTGGCACAGTGCTGGGATGACTAT	2212	Hs.352642	GO:0005886|GO:0016021|GO:0019864	low affinity immunoglobulin gamma Fc region receptor II-a isoform 2 precursor	5	18.1686	2.45604	3.63183	5	5	5	16.3251	22.5478	15.6328	2.46913	2.40305	2.49594	3.39548	4.0887	3.41132
ASHGA5P034460	0.0194349	0.0668514	2.13666	down	protein_coding	NM_006202	CCDS12238.1	PDE4A	RefSeq	4276	chr19	+	10563632	10580307		TCTCCAAGATGCCCTTGGTGGATTTCTTCTGCGAGACCTGCTCTAAGCCTTGGCTGGTGG	5141	Hs.89901	GO:0004115|GO:0005515|GO:0005634|GO:0005829|GO:0006198|GO:0006198|GO:0007165|GO:0016020|GO:0032587|GO:0042493|GO:0046872|GO:0048471	cAMP-specific 3',5'-cyclic phosphodiesterase 4A isoform 4	20.9378	73.6477	4.70671	5.80207	11.7573	32.9986	18.0575	80.7268	62.2265	77.9897	4.16282	5.10271	4.85459	5.87228	5.66228	5.87164
ASHGA5P006614	0.0279916	0.0852021	2.22911	down	protein_coding	NM_012260	CCDS2627.1	HACL1	RefSeq	2037	chr3	-	15602239	15643130		GGGAGCTTTCCAGGAGTTTCCTCAGGTTGAAGCTTGTAGATTATATACCAAGTTCTCTGC	26061	Hs.63290	GO:0000287|GO:0001561|GO:0001561|GO:0005102|GO:0005777|GO:0005782|GO:0016830|GO:0016830|GO:0030976|GO:0042802|GO:0044255|GO:0044281|GO:0048037|GO:0051259	2-hydroxyacyl-CoA lyase 1	738.156	1767.75	9.3805	10.537	407.306	1224.22	582.946	2193.53	1626.27	1483.44	8.83157	9.88745	9.42249	10.8094	10.5317	10.2698
ASHGA5P047427	0.00914568	0.0413155	2.39972	down	protein_coding	NM_001190478	CCDS53537.1	MTRNR2L5	RefSeq	1739	chr10	+	57358749	57360487		CTATCTATTTAGCATTTTTCCCAGTATGAAAGGATATGAGAAACCGGGCCCACTTCACAA	100463289	Hs.727204	GO:0005576|GO:0005737	humanin-like protein 5	10.551	44.4228	3.7811	5.04396	7.72506	17.8289	6.09905	44.1465	43.5196	45.6022	3.60831	4.29786	3.43712	4.95271	5.11321	5.06597
ASHGA5P012718	0.00421658	0.0258987	3.68026	down	protein_coding	ENST00000380099	CCDS9347.1	KL	GENCODE	5006	chr13	+	33590570	33640282		CTACATTCAAGTAGATACCACTCTGTCTCAGTTTACCGACCTGAATGTTTACCTGTGGGA	9365	Hs.524953	GO:0005975|GO:0007568|GO:0008286|GO:0002526|GO:0030501|GO:0008543|GO:0006112|GO:0090080|GO:0016021|GO:0005886|GO:0005576|GO:0005615|GO:0005624|GO:0005887|GO:0005625|GO:0004871|GO:0005179|GO:0004553|GO:0043169|GO:0017134|GO:0005499|GO:0005104|GO:0004566|GO:0008422|GO:0005515	klotho [Source:HGNC Symbol;Acc:6344]	6.66466	42.6938	3.10073	4.98054	5	8.70182	6.29215	46.8893	40.3112	40.881	2.46913	3.35436	3.47871	5.04237	4.99585	4.9034
ASHGA5P031991	0.000915776	0.0115357	2.13109	down	protein_coding	NM_153813	CCDS32502.1	ZFPM1	RefSeq	3241	chr16	+	88520013	88601574		TGTCTGCCACAGCTGTGGCTTCATCTCCACCACAAGGGACATCCTCTACAGCCACTTGGT	161882	Hs.632218	GO:0001078|GO:0001085|GO:0001102|GO:0002295|GO:0003151|GO:0003181|GO:0003192|GO:0003195|GO:0003677|GO:0005515|GO:0005654|GO:0005667|GO:0005737|GO:0007596|GO:0008134|GO:0008270|GO:0010724|GO:0010724|GO:0017053|GO:0030218|GO:0030219|GO:0030220|GO:0030851|GO:0032091|GO:0032642|GO:0035162|GO:0035855|GO:0045078|GO:0045403|GO:0045599|GO:0055008|GO:0060318|GO:0060319|GO:0060377|GO:0060412|GO:0060413|GO:…	zinc finger protein ZFPM1	26.9713	94.9468	5.10496	6.19655	25.154	37.4725	18.2874	103.381	88.4619	92.9976	5.17678	5.26728	4.87081	6.2423	6.20995	6.13739
ASHGA5P012518	0.043248	0.113946	2.41777	down	protein_coding	NM_144982	CCDS41813.1	ZFC3H1	RefSeq	7158	chr12	-	72003378	72057749		AATATCCCAACATGCCTGGCCACCTGGAAAATAGCCATTGCTGCTGAGATTGTTCTAAAG	196441	Hs.527874	GO:0005515|GO:0005622|GO:0006396|GO:0046872	zinc finger C3H1 domain-containing protein	549.503	1564.16	9.04539	10.3191	326.202	666.545	655.764	1955.35	1743.02	994.104	8.53802	9.01113	9.58703	10.6352	10.6299	9.69209
ASHGA5P013935	0.000132883	0.00472892	2.10488	down	protein_coding	ENST00000397990	CCDS9554.1	ANG	GENCODE	742	chr14	+	21156931	21162345		AACTGCCAGATTTTTGTAAGATTCTTCCTCCTGGGAGCCTGTGTTGGAAGAGATGGTGAT	283	Hs.283749	GO:0007154|GO:0001525|GO:0001666|GO:0001541|GO:0001890|GO:0001938|GO:0001556|GO:0009725|GO:0008219|GO:0048662|GO:0016477|GO:0017148|GO:0030041|GO:0050714|GO:0032148|GO:0009303|GO:0007202|GO:0042592|GO:0042327|GO:0006651|GO:0032431|GO:0005634|GO:0005615|GO:0005730|GO:0043025|GO:0030426|GO:0005605|GO:0032311|GO:0003677|GO:0005515|GO:0005102|GO:0004519|GO:0003779|GO:0005507|GO:0019843|GO:0004540|GO:…	angiogenin, ribonuclease, RNase A family, 5 [Source:HGNC Symbol;Acc:483]	315.759	799.144	8.33868	9.41241	281.337	417.138	248.802	787.717	711.231	898.485	8.3443	8.38316	8.28857	9.32469	9.36406	9.54849
ASHGA5P042621	0.00338927	0.0232367	2.87452	down	protein_coding	NM_005021	CCDS5148.1	ENPP3	RefSeq	3180	chr6	+	131958441	132068550		AGCCAAAAATGTTCCTTCTATTTAGCAGACAAGAATATCACCCACGGCTTCCTCTATCCT	5169	Hs.486489	GO:0003676|GO:0004528|GO:0004551|GO:0005044|GO:0005576|GO:0005887|GO:0006796|GO:0006955|GO:0009143|GO:0030247|GO:0030505|GO:0035529|GO:0046872|GO:0047429|GO:0048471	ectonucleotide pyrophosphatase/phosphodiesterase family member 3	12.2562	61.198	4.00701	5.53034	9.82261	19.6042	7.34174	59.2032	65.3947	58.996	3.92549	4.42238	3.67317	5.39656	5.74166	5.45279
ASHGA5P034774	0.00115986	0.0129167	2.27139	down	protein_coding	NM_013289	CCDS42621.1	KIR3DL1	RefSeq	1986	chr19	+	55327892	55342233	NM_001018081	CTTCGGACTATTTTCCAGCCTTCTGTCAGCAGTGAAACTTATAAAATTTTTTGTGATTTC	3811	Hs.645228	GO:0005886|GO:0005887|GO:0006955|GO:0030109|GO:0050776	killer cell immunoglobulin-like receptor 3DL1 precursor	14.4346	59.1874	4.29313	5.47671	14.8199	18.6586	9.82529	57.8025	59.1753	60.5844	4.47423	4.35745	4.04771	5.35823	5.58231	5.48958
ASHGA5P002612	0.0155235	0.0574323	2.23159	down	protein_coding	NM_016531	CCDS3444.1	KLF3	RefSeq	5632	chr4	+	38665789	38703129		ACACACACAGGAGAAAAACCCTACAAATGTACATGGGAAGGGTGCACATGGAAGTTTGCT	51274	Hs.298658	GO:0003677|GO:0003700|GO:0005634|GO:0006351|GO:0007275|GO:0008270	Krueppel-like factor 3	154.706	434.704	7.32027	8.47834	94.739	247.158	122.222	535.93	416.33	351.853	6.91869	7.67577	7.36635	8.75211	8.55275	8.13016
ASHGA5P027797	0.000832233	0.0109729	2.06954	down	protein_coding	NM_199286	CCDS8582.1	DPPA3	RefSeq	1040	chr12	+	7864088	7870152	ENST00000557188	TGTCATCAGTTTCTGCTACGTTTCAAAGATCCTGGAGAAGCCTAGTGTTGTGTCAAGACG	359787	Hs.131358	GO:0001939|GO:0001940|GO:0005634|GO:0005737|GO:0040016	developmental pluripotency-associated protein 3	9.11196	36.8111	3.70605	4.75536	9.69422	11.0521	6.58952	36.9384	35.696	37.799	3.90906	3.67409	3.535	4.67725	4.80725	4.78158
ASHGA5P003982	0.00473558	0.0277286	4.3518	down	protein_coding	ENST00000281806	CCDS5044.1	MCHR2	GENCODE	2368	chr6	-	100367785	100442099		GAGCACCCAGCTTTAATCCCTGGAAAGTCCACGAACAATGAATCCATTTCATGCATCTTG	84539	Hs.591342	GO:0007186|GO:0016021|GO:0005886|GO:0004930	melanin-concentrating hormone receptor 2 [Source:HGNC Symbol;Acc:20867]	6.3399	41.2659	2.79142	4.91303	5	9.01969	5	39.8841	49.8257	34.0877	2.46913	3.40919	2.49594	4.7973	5.31989	4.6219
ASHGA5P011066	0.0321927	0.0937579	2.00386	down	protein_coding	NM_001144914	CCDS44486.1	FGFR2	RefSeq	3821	chr10	-	123237843	123353481		GATGTTGTGGCGCCTGGAAGAGAAAAGGAGATTACAGCTTCCCCAGACTACCTGGAGATA	2263	Hs.533683	GO:0000122|GO:0001525|GO:0001657|GO:0001701|GO:0002053|GO:0003148|GO:0003149|GO:0004713|GO:0005007|GO:0005007|GO:0005007|GO:0005515|GO:0005524|GO:0005576|GO:0005634|GO:0005737|GO:0005794|GO:0005886|GO:0005886|GO:0005887|GO:0005938|GO:0006915|GO:0007267|GO:0007409|GO:0007528|GO:0008201|GO:0008284|GO:0008284|GO:0008284|GO:0008285|GO:0008286|GO:0008543|GO:0008543|GO:0008543|GO:0008543|GO:0008589|GO:…	fibroblast growth factor receptor 2 isoform 4 precursor	18.4576	64.8966	4.61544	5.61822	12.1456	19.5019	23.7254	65.8566	63.5185	65.3148	4.20974	4.41579	5.22078	5.55713	5.69561	5.60193
ASHGA5P022977	0.021079	0.0704918	2.0108	down	protein_coding	NM_020705	CCDS42107.1	TBC1D24	RefSeq	6589	chr16	+	2525146	2555734		AGCAGAAGAGGCAGTTTGTACACTTGGCCGTCCATGCAGAGAACTTCCGCTCGGAGATCG	57465	Hs.353087	GO:0005097|GO:0005515|GO:0005737|GO:0031175	TBC1 domain family member 24 isoform 2	5.02776	18.5433	2.66545	3.67321	5.08327	5	5	18.8124	21.0725	15.7451	3.09734	2.40305	2.49594	3.61342	3.98493	3.42129
ASHGA5P008131	0.00290321	0.0213468	2.12127	down	protein_coding	ENST00000340189	CCDS13406.1	NCOA3	GENCODE	7984	chr20	+	46130600	46285621	NM_001174087, NM_181659	TATCAAGAAGCTTATCTTAATGGCCATGCAGAAACCCCAGTATATCGATTCTCGTTGGCT	8202	Hs.592142	GO:0006351|GO:0045893|GO:0044255|GO:0044281|GO:0035264|GO:0006355|GO:0007165|GO:0045944|GO:0048589|GO:0010628|GO:0045618|GO:0030521|GO:0051091|GO:0016573|GO:0060068|GO:0060744|GO:0033148|GO:2001141|GO:0035624|GO:0005634|GO:0005737|GO:0005794|GO:0005654|GO:0005515|GO:0004871|GO:0046966|GO:0003682|GO:0003713|GO:0016922|GO:0004402|GO:0035257|GO:0047485|GO:0050681|GO:0030374|GO:0030331	nuclear receptor coactivator 3 [Source:HGNC Symbol;Acc:7670]	5	17.0215	2.45604	3.54097	5	5	5	14.5339	16.7302	19.8002	2.46913	2.40305	2.49594	3.22464	3.61883	3.77944
ASHGA5P008623	0.00163393	0.0153445	2.07969	down	protein_coding	NM_014146	CCDS5566.2	LAT2	RefSeq	2010	chr7	+	73624086	73644164		TGGACTCTCAGCATCACAAGAGGCAACACCAGGAGCCAACATGAGCTCGGGGACTGAACT	7462	Hs.647049	GO:0005515|GO:0005622|GO:0005886|GO:0016021|GO:0019722|GO:0035556|GO:0042113|GO:0042113|GO:0042169|GO:0043303|GO:0045121|GO:0050853	linker for activation of T-cells family member 2 precursor	5	16.7656	2.45604	3.51241	5	5	5	20.3605	15.7651	14.1714	2.46913	2.40305	2.49594	3.74144	3.5276	3.2682
ASHGA5P003194	0.000770417	0.0106043	2.03524	down	protein_coding	NM_007005	CCDS43837.1	TLE4	RefSeq	4749	chr9	+	82186877	82341656		CTCCATCAAGAGCTCTTCAGTATCCCCATCAGCCAGTTTCCGAGGTGCTGAGAAGCACAG	7091	Hs.444213	GO:0003674|GO:0005634|GO:0005654|GO:0006351|GO:0006355|GO:0007219|GO:0008150|GO:0016055	transducin-like enhancer protein 4	29.6741	101.294	5.26694	6.29214	28.8899	36.7599	23.3726	106.372	105.506	92.0026	5.35845	5.24151	5.20086	6.28458	6.47025	6.12159
ASHGA5P039406	0.00201632	0.0172976	2.1877	down	protein_coding	NM_001142564	CCDS47050.1	CNGA1	RefSeq	2872	chr4	-	47937993	47983550	NM_000087	CAACTGGCTGTTTTGCATCACATTACCTGTTATGTACAACTGGACAATGGTTATTGCCAG	1259	Hs.1323	GO:0005216|GO:0005887|GO:0006810|GO:0007601|GO:0030553|GO:0042622|GO:0050896	cGMP-gated cation channel alpha-1 isoform 1	5	17.6458	2.45604	3.58546	5	5	5	18.746	13.6115	20.5797	2.46913	2.40305	2.49594	3.60749	3.30603	3.84285
ASHGA5P004051	0.000890718	0.0113895	2.26648	down	protein_coding	NM_018343	CCDS4089.1	RIOK2	RefSeq	3980	chr5	-	96496570	96519005		AATTCCTCCAGAACTGGTGAAACAGAAGGTGAAACGTCAGTTGACAAAACAGCAAAAATC	55781	Hs.27021	GO:0004674|GO:0005524	serine/threonine-protein kinase RIO2 isoform 1	7521.86	19332.6	12.8737	14.0541	7893.85	8394.51	6277.21	20577.3	21682.7	15737.7	12.9906	12.8047	12.8257	14.1238	14.217	13.8216
ASHGA5P002127	0.000565734	0.00909203	2.38113	down	protein_coding	NM_005624	CCDS12194.1	CCL25	RefSeq	1002	chr19	+	8117645	8127547	NM_001201359	CTGCTGCGATATTCTACCTCCCCAAGAGACACAGGAAGGTGTGTGGGAACCCCAAAAGCA	6370	Hs.310511	GO:0005179|GO:0005576|GO:0005615|GO:0006935|GO:0006954|GO:0006955|GO:0007166|GO:0007186|GO:0008009|GO:0031735|GO:0050900	C-C motif chemokine 25 isoform 1 precursor	340.738	966.512	8.43644	9.68808	331.137	441.831	249.246	877.125	957.027	1065.38	8.55535	8.46399	8.28997	9.49151	9.78873	9.78399
ASHGA5P005912	0.0242747	0.0773711	2.30715	down	protein_coding	ENST00000392038	CCDS12552.1	AKT2	GENCODE	5300	chr19	-	40736223	40791302		CACAAGCGTGGTGAATACATCAAGACCTGGAGGCCACGGTACTTCCTGCTGAAGAGCGAC	208	Hs.631535	GO:0043066|GO:0006464|GO:0007165|GO:0045944|GO:0030334|GO:0006468|GO:0006417|GO:0045444|GO:0006006|GO:0033138|GO:0006970|GO:0010765|GO:0014850|GO:0009967|GO:0030335|GO:0032869|GO:0033119|GO:0043154|GO:0043491|GO:0045429|GO:0046326|GO:0046328|GO:0050927|GO:0008286|GO:0060644|GO:0005978|GO:0008643|GO:0045725|GO:2000147|GO:0016310|GO:0032000|GO:0010748|GO:0010907|GO:0071156|GO:0005634|GO:0005886|GO:…	v-akt murine thymoma viral oncogene homolog 2 [Source:HGNC Symbol;Acc:392]	6.60946	27.5954	3.09781	4.30392	5	7.72774	7.10066	28.3925	25.0382	29.3556	2.46913	3.19018	3.63412	4.27091	4.25635	4.3845
ASHGA5P021981	0.000105133	0.00422315	3.23588	down	protein_coding	NM_014212	CCDS8867.1	HOXC11	RefSeq	2100	chr12	+	54366909	54370203		GCCGCCCCCAACGCCCCCCGCACCCGCAAGAAGCGCTGCCCTTATTCGAAATTCCAGATC	3227	Hs.127562	GO:0001501|GO:0001656|GO:0001759|GO:0003700|GO:0005634|GO:0005730|GO:0005737|GO:0005739|GO:0006351|GO:0007492|GO:0009952|GO:0009954|GO:0042733|GO:0043565	homeobox protein Hox-C11	5649.94	20114.1	12.4274	14.1215	5839.11	6701.46	4409.26	20740.2	18630	20972	12.5526	12.4324	12.2971	14.137	13.9722	14.2553
ASHGA5P052383	0.000156593	0.00505827	2.44794	down	protein_coding	NM_130809	CCDS4143.1	PRRC1	RefSeq	4700	chr5	+	126853308	126890780		AGATGATCTACAGTGCAGCCAGAGCGATAGCGGGCATGTATAAACAGCGCCTGCCACCCA	133619	Hs.483259	GO:0005794	protein PRRC1	651.974	1844.58	9.31441	10.606	599.206	844.774	511.943	1994.24	1872.9	1666.6	9.3495	9.33993	9.25379	10.6566	10.7266	10.4347
ASHGA5P055614	0.0269012	0.0829648	2.12477	down	protein_coding	NM_170665	CCDS9144.1	ATP2A2	RefSeq	8329	chr12	+	110719031	110788897		ACCTGGAACCTGGTAAAGAGTGTGTGCAGCCTGCCACCAAATCCTGCTCGTTCTCGGCAT	488	Hs.506759	GO:0002026|GO:0005388|GO:0005509|GO:0005524|GO:0005789|GO:0005789|GO:0005887|GO:0006754|GO:0006810|GO:0006874|GO:0006984|GO:0007155|GO:0007596|GO:0008022|GO:0008544|GO:0016020|GO:0016529|GO:0031095|GO:0031775|GO:0033017|GO:0034220|GO:0043231|GO:0043234|GO:0043434|GO:0044548|GO:0045822|GO:0055085|GO:0070296	sarcoplasmic/endoplasmic reticulum calcium ATPase 2 isoform b	4244.6	9722.35	11.9394	13.0267	2777.11	6529.73	3426.94	12221.4	9312.92	7632.68	11.4855	12.3869	11.9459	13.354	13.0067	12.7195
ASHGA5P007659	0.00273441	0.02069	3.65001	down	protein_coding	NM_001080824	CCDS46349.1	TRABD2A	RefSeq	1733	chr2	-	85048795	85108252		TGAACTTTTCACAGGTTCCCAATTTTATTAATGCCACGCTACCACCTCAGGAGCGCATCA	129293	Hs.469134	GO:0004222|GO:0005887|GO:0006508|GO:0008152|GO:0016055|GO:0017147|GO:0018158|GO:0030178|GO:0031301|GO:0046872|GO:0060322	UPF0632 protein C2orf89 precursor	6.51444	40.659	3.04254	4.91044	6.24631	8.297	5	39.1922	40.7424	42.0423	3.34145	3.29023	2.49594	4.77099	5.01415	4.94618
ASHGA5P052640	0.0153612	0.0570266	2.5391	down	protein_coding	NM_005572	CCDS1131.1	LMNA	RefSeq	2077	chr1	+	156084460	156107657	NR_047544, NR_047545	TTGAGGACGACGAGGATGAGGATGGAGATGACCTGCTCCATCACCACCACGTGAGTGGTA	4000	Hs.594444	GO:0005198|GO:0005198|GO:0005515|GO:0005634|GO:0005635|GO:0005635|GO:0005638|GO:0005652|GO:0005654|GO:0005737|GO:0005882|GO:0005882|GO:0006915|GO:0006921|GO:0006987|GO:0007517|GO:0030334|GO:0030951|GO:0030968|GO:0034504|GO:0042981|GO:0048471|GO:0071456|GO:0090343	lamin isoform C	9148.16	26389.2	13.1033	14.4476	7397.43	13052	6995.03	22198.2	20065	36904.4	12.8861	13.4333	12.9906	14.2334	14.0963	15.0133
ASHGA5P036967	0.000296536	0.00664926	2.42283	down	protein_coding	NM_020689	CCDS13140.1	SLC24A3	RefSeq	3905	chr20	+	19193289	19703541		ATACATGTTCTATGCGCTGGCCATTGTGTGTGATGACTTCTTCGTCCCTTCCTTGGAAAA	57419	Hs.654790	GO:0005886|GO:0006811|GO:0008273|GO:0015293|GO:0016021|GO:0055085	sodium/potassium/calcium exchanger 3 precursor	129.915	419.015	7.17349	8.45018	100.319	169.879	119.545	413.245	397.173	446.626	6.99874	7.18817	7.33355	8.35564	8.47988	8.51503
ASHGA5P011735	0.00404362	0.0253399	3.43512	down	protein_coding	NM_018344	CCDS7310.1	SLC29A3	RefSeq	2277	chr10	+	73079009	73123147	NM_001174098	AGGACCCTGAGGGCTCAGACATCCTGAACTACTTTGAGAGCTACCTTGCCGTTGCCTCCA	55315	Hs.438419	GO:0005337|GO:0005765|GO:0016021|GO:0031902|GO:0055085	equilibrative nucleoside transporter 3 isoform a	9.34602	56.428	3.61121	5.39157	6.56831	16.2116	5.25809	65.7956	47.4007	56.0877	3.40352	4.17676	3.25335	5.55577	5.2437	5.37524
ASHGA5P046388	0.0444018	0.116067	2.63574	down	protein_coding	NM_001139457	CCDS48191.1	BCAP31	RefSeq	1828	chrX	-	152965946	152989556		ACTGCTCTTCCCGAAGAACGCCTTTCAGTTAAACGGGCGTCGGAAATCTCGGGCTTCCTG	10134	Hs.522817	GO:0000139|GO:0002474|GO:0005102|GO:0005515|GO:0005783|GO:0005789|GO:0005811|GO:0005829|GO:0005887|GO:0006886|GO:0006915|GO:0006921|GO:0006955|GO:0007204|GO:0016192|GO:0032471|GO:0033116|GO:0035584|GO:0043280|GO:0051561|GO:0071556|GO:2001244	B-cell receptor-associated protein 31 isoform a	8.31879	34.0177	3.22559	4.62379	5.26816	14.6882	5	28.9699	38.2027	34.8806	3.134	4.04681	2.49594	4.30469	4.91183	4.65485
ASHGA5P014437	0.00311765	0.0221766	2.2542	down	protein_coding	NM_015132	CCDS47551.1	SNX13	RefSeq	6371	chr7	-	17830384	17980131		ATTATGCCAGATGAGCTGAAGCACATTATTGGGGCTGAGACAACACGGAAAGGTATTCTT	23161	Hs.487648	GO:0005769|GO:0006886|GO:0007154|GO:0031901|GO:0035091|GO:0038032|GO:0043547	sorting nexin-13	1804.47	4728.64	10.7907	11.9634	1698.72	2233.54	1481.15	5521.63	5118.03	3546.25	10.8197	10.776	10.7765	12.1535	12.1402	11.5963
ASHGA5P053782	0.0418568	0.111509	2.22437	down	protein_coding	ENST00000374798	CCDS35085.1	CYLC2	GENCODE	2171	chr9	+	105757592	105780770		GTTTGAACTTACAATACTTAAGTCCTGGCAAGTCATAAGTGGGGAAAATGTCTCTCCCAA	1539	Hs.3232	GO:0007275|GO:0030154|GO:0007283|GO:0033150|GO:0005200	cylicin, basic protein of sperm head cytoskeleton 2 [Source:HGNC Symbol;Acc:2583]	57.1277	185.707	6.06493	7.21833	86.9258	45.6315	38.8257	177.743	190.844	188.536	6.79661	5.52683	5.87136	7.0694	7.39248	7.19312
ASHGA5P010575	0.000380168	0.00752504	2.57332	down	protein_coding	NM_203458	CCDS909.1	NOTCH2NL	RefSeq	4962	chr1	+	145209110	145285912		CTGCCTTCCAGAAACAGTGAGAAGAGGAACAGAGCTCTGGGAAAGAGACAGGGAAGTCTG	388677	Hs.728902	GO:0005509|GO:0005576|GO:0005737|GO:0007219|GO:0007275|GO:0030154	notch homolog 2 N-terminal-like protein	2109.76	6206.97	11.0236	12.3872	2157.02	2314.77	1857.48	5837.87	6253.49	6529.57	11.1437	10.8302	11.0969	12.2375	12.448	12.4762
ASHGA5P053681	3.26722e-05	0.00269605	2.08766	down	protein_coding	NM_001039592	CCDS43798.1	SPAG8	RefSeq	1715	chr9	-	35809806	35812259		TTGCCCTATGAACCTGAGAATTACCCCTACCAATTGGGAGAAATATCTTCCCTTCCCTGT	26206	Hs.256747	GO:0001669|GO:0003674|GO:0008017|GO:0008150|GO:0016020	sperm-associated antigen 8 isoform 1	1085.1	2605.06	10.057	11.1189	952.247	1359.79	943.256	2791.25	2335.01	2688.92	9.99367	10.0589	10.1185	11.1571	11.0454	11.1542
ASHGA5P012295	5.55623e-05	0.00319434	3.7873	down	protein_coding	NM_001922	CCDS9470.1	DCT	RefSeq	2304	chr13	-	95091840	95131936		CATTTTTGTGGTTCTTCATTCCTTTACTGATGCCATCTTTGATGAGTGGATGAAAAGATT	1638	Hs.301865	GO:0002052|GO:0004167|GO:0005507|GO:0005829|GO:0006583|GO:0008544|GO:0016021|GO:0016491|GO:0021847|GO:0033162|GO:0042470|GO:0048066|GO:0048468	L-dopachrome tautomerase isoform 1 precursor	7.83389	57.2028	3.50419	5.42536	6.12887	10.5114	6.86142	59.5528	56.9381	55.1175	3.31533	3.6063	3.59094	5.40503	5.51871	5.35234
ASHGA5P038816	0.0263026	0.0817606	2.80407	down	protein_coding	NM_004947	CCDS46835.1	DOCK3	RefSeq	8777	chr3	+	50712671	51421629		ACAAAGGGGAAAAGAAACTCTTTGGCTTTGCATTCTCAACCCTGATGCGTGATGATGGCA	1795	Hs.476284	GO:0005085|GO:0005515|GO:0005525|GO:0005737|GO:0017124|GO:0051020	dedicator of cytokinesis protein 3	7.57533	36.6936	3.25286	4.74038	5	8.70999	9.01601	42.1697	33.9043	34.0068	2.46913	3.35646	3.933	4.87917	4.7244	4.61758
ASHGA5P030025	0.00156929	0.0151192	2.46551	down	protein_coding	NM_207381	CCDS32241.1	TNFAIP8L3	RefSeq	2292	chr15	-	51348798	51397473		CCACGTTACAAACAAGACTCATCCCCTTATCTTTTCATCTTCAGAGGGGAAAGGGACTTG	388121	Hs.306343		tumor necrosis factor alpha-induced protein 8-like protein 3	22.6022	93.7732	4.87764	6.17953	16.2367	31.9418	19.6281	93.5196	98.6317	89.1681	4.59883	5.06132	4.97276	6.09667	6.36754	6.07437
ASHGA5P012991	0.0237818	0.0761759	2.38274	down	protein_coding	NM_001166139	CCDS54749.1	LCORL	RefSeq	5057	chr4	-	17882217	18023483		AAATTCAGTGGCTGGGAGACTACACAGAAACAGAGAGGACTATGTGGAAAGAAGTGCTGA	254251	Hs.446201	GO:0003677|GO:0005634|GO:0006357|GO:0006366	ligand-dependent nuclear receptor corepressor-like protein isoform 1	80.7308	284.28	6.54901	7.80163	65.1714	110.202	66.8191	359.596	315.131	178.113	6.42683	6.64124	6.57896	8.1482	8.14901	7.10767
ASHGA5P002333	0.021775	0.0720167	2.08778	down	protein_coding	NM_016569	CCDS9176.1	TBX3	RefSeq	4814	chr12	-	115108058	115121969		AACATTTCAGACAAACATGGATTTACTTTGGCCTTCCCAAGTGATCACGCTACGTGGCAG	6926	Hs.731585	GO:0001501|GO:0001568|GO:0001701|GO:0001947|GO:0003151|GO:0003167|GO:0003700|GO:0005634|GO:0006351|GO:0006357|GO:0007569|GO:0008284|GO:0008595|GO:0009887|GO:0010159|GO:0019827|GO:0021761|GO:0030539|GO:0030540|GO:0030857|GO:0030879|GO:0032275|GO:0035115|GO:0035136|GO:0042733|GO:0043565|GO:0045662|GO:0045787|GO:0045892|GO:0045893|GO:0046884|GO:0048332|GO:0060021|GO:0060412|GO:0060444|GO:0060596|GO:…	T-box transcription factor TBX3 isoform 2	16.2081	59.9756	4.43646	5.49843	21.8962	15.8798	10.8484	60.7678	62.6788	56.4802	4.99009	4.14865	4.17064	5.43375	5.67514	5.3864
ASHGA5P054761	0.0463091	0.119363	2.48498	down	protein_coding	NM_147199	CCDS7846.1	MRGPRX1	RefSeq	1190	chr11	-	18955359	18956549		AATCAGAGATCATACAGCTGGTGATCACAACTGGTTTCTGTTTCCAGGGTCACCAGACTA	259249	Hs.711459	GO:0004930|GO:0005886|GO:0006953|GO:0016021	mas-related G-protein coupled receptor member X1	6.77691	29.2013	3.07328	4.38651	9.9247	5.40602	5	25.9499	29.9698	31.6843	3.94083	2.78305	2.49594	4.126	4.52853	4.50501
ASHGA5P004942	0.0045695	0.0270317	2.37487	down	protein_coding	NM_138999	CCDS42444.1	NETO1	RefSeq	1849	chr18	-	70501274	70532934		AGATGCTGGCAGAGCCATTCCCTAAGGTTGTAGCAAGTTTAATCATCCTCCATTTGTCTG	81832	Hs.465407	GO:0005576|GO:0005886|GO:0007613|GO:0008542|GO:0014069|GO:0016021|GO:0030054|GO:0045211|GO:0048169|GO:0060076	neuropilin and tolloid-like protein 1 isoform 1 precursor	16.1159	66.3007	4.39371	5.64156	11.4482	24.9483	11.9512	60.7505	61.5399	76.6117	4.12754	4.74209	4.31149	5.43359	5.64582	5.84527
ASHGA5P034106	0.00473636	0.0277286	2.27917	down	protein_coding	NM_004750	CCDS32962.1	CRLF1	RefSeq	1824	chr19	-	18704034	18717660		AAGTGCGCTGCAACCCCTTTGGCATCTATGGCTCCAAGAAAGCCGGGATCTGGAGTGAGT	9244	Hs.114948	GO:0001657|GO:0004872|GO:0005125|GO:0005127|GO:0005515|GO:0005615|GO:0005737|GO:0005886|GO:0008284|GO:0019955|GO:0042517|GO:0043524|GO:0046982|GO:0097058|GO:2000672	cytokine receptor-like factor 1 precursor	57.8548	202.228	6.15158	7.34009	48.4908	60.5043	64.5692	231.892	179.982	194.811	6.03883	5.88058	6.53532	7.47509	7.30241	7.24276
ASHGA5P055969	0.00739632	0.0361126	2.07777	down	protein_coding	NM_016586	CCDS9658.1	MBIP	RefSeq	1661	chr14	-	36767763	36789882	NM_001144891	AATTAGTGCCCTCAAACAAGCCCTCCTCAGAAAATCAAGAGAAGCAGAATCCATGGCAAC	51562	Hs.368647	GO:0000173|GO:0004860|GO:0005515|GO:0005671|GO:0005730|GO:0005737|GO:0042802|GO:0043966	MAP3K12-binding inhibitory protein 1 isoform 1	5446.16	12834.8	12.3916	13.4466	5491.44	5934.18	4912.85	14610	14396.8	9497.5	12.483	12.2334	12.4584	13.6297	13.6527	13.0575
ASHGA5P054335	4.42826e-05	0.0029626	2.92079	down	protein_coding	ENST00000366487	CCDS1634.2	OR2C3	GENCODE	2742	chr1	-	247693433	247697141		GCAAATTTAGAGACTCCAGTGCCTTCTGAGAAGGAAGATCAAGTTTACATCGAGCAAAGT	81472	Hs.730218	GO:0007186|GO:0016021|GO:0005886|GO:0004930|GO:0004984	olfactory receptor, family 2, subfamily C, member 3 [Source:HGNC Symbol;Acc:15005]	5	22.8898	2.45604	4.0024	5	5	5	25.6053	19.4112	23.653	2.46913	2.40305	2.49594	4.10684	3.85426	4.04609
ASHGA5P004319	0.00213508	0.0178841	2.19101	down	protein_coding	NM_022749	CCDS6021.2	FAM160B2	RefSeq	3759	chr8	+	21946713	21961891		TGTTTGACCGCATGTCCCGGATTCTGGATCAGCCATACAGCCTGAACCTGCAGGTGACCT	64760	Hs.491223		protein FAM160B2	18.1544	70.4325	4.6098	5.74139	13.7535	23.0973	17.6123	75.2805	72.0949	63.9222	4.37291	4.63591	4.82057	5.76024	5.89453	5.56941
ASHGA5P039369	0.00215341	0.0179801	2.45446	down	protein_coding	NM_000730	CCDS3438.1	CCKAR	RefSeq	1682	chr4	-	26483017	26492042		ATAACAACCAGACCGCGAATATGTGCCGCTTTCTACTGCCAAATGATGTTATGCAGCAGT	886	Hs.129	GO:0001659|GO:0001696|GO:0001764|GO:0002023|GO:0004951|GO:0005764|GO:0005768|GO:0005783|GO:0005886|GO:0005887|GO:0007200|GO:0007204|GO:0007409|GO:0007584|GO:0007586|GO:0007631|GO:0009314|GO:0009408|GO:0030073|GO:0030157|GO:0030900|GO:0031016|GO:0031100|GO:0031532|GO:0032496|GO:0032870|GO:0042594|GO:0043195|GO:0043266|GO:0051384|GO:0090274	cholecystokinin receptor type A	9.75967	43.9512	3.73081	5.02622	7.82925	15.1403	6.3094	48.2099	41.1784	42.4655	3.62711	4.08265	3.48268	5.08391	5.03223	4.96252
ASHGA5P008035	0.0191694	0.0661849	2.40303	down	protein_coding	NM_001100426	CCDS47105.1	RAP1GDS1	RefSeq	3770	chr4	+	99182526	99365012	NM_001100427, NM_021159	TACGATAGCCATGAGGGCAGAAGTGCAGTTGACCAAGCAGGTGGTGCACAGATTGTAATT	5910	Hs.132858	GO:0005096|GO:0005575|GO:0008150|GO:0043547	rap1 GTPase-GDP dissociation stimulator 1 isoform 1	565.051	1561.69	9.06917	10.334	360.729	842.431	491.994	1881.28	1728.11	1075.69	8.68065	9.33585	9.19101	10.5831	10.6194	9.79949
ASHGA5P049919	0.00381217	0.0246291	2.21392	down	protein_coding	NM_024702	CCDS11819.1	ZNF750	RefSeq	3218	chr17	-	80787309	80797931		AATATCCCTCTAACCTGCCGATTCCTTACGGATTTTACAGGCCAGAGTCTGCATTTTCCT	79755	Hs.653124	GO:0001046|GO:0001077|GO:0005634|GO:0008270|GO:0008544|GO:0030154|GO:0045944	zinc finger protein 750	70.9764	235.646	6.42575	7.57235	69.2363	75.6725	68.0203	256.787	246.013	204.138	6.51234	6.16544	6.59947	7.62921	7.77485	7.31299
ASHGA5P010028	0.0482287	0.122932	2.41624	down	protein_coding	NM_134270	CCDS13887.1	SMTN	RefSeq	3236	chr22	+	31477281	31500610		AGAGGACATGGTGCGGCTTCGAGAGCCTGACTGGAAGATGCTGGTGGACTGTGTGCCCCT	6525	Hs.149098	GO:0003779|GO:0005737|GO:0005856|GO:0006939|GO:0007517|GO:0008307|GO:0015629	smoothelin isoform a	1106.17	3123.51	9.99869	11.2714	814.393	1727.97	776.156	2612.16	1826.24	4932.13	9.7743	10.3907	9.83107	11.062	10.6938	12.0586
ASHGA5P012547	0.000563786	0.00909203	2.17853	down	protein_coding	NM_001024607	CCDS34735.1	C7orf66	RefSeq	422	chr7	-	108524037	108524637		GCTGTTTCAGGCTGTACTCATTCTTTCTGCACCACAAATGTCATGCCTTCTCAAGTGTTT	154907	Hs.276325	GO:0016021	uncharacterized protein C7orf66	29.5354	109.549	5.28151	6.40487	27.0377	34.235	27.3334	126.29	101.729	100.629	5.27624	5.15215	5.41615	6.54208	6.41598	6.25654
ASHGA5P037749	0.000758263	0.0105044	2.95559	down	protein_coding	NM_058238	CCDS33667.1	WNT7B	RefSeq	3928	chr22	-	46316247	46373008		AAACTTTCGCAAGTGGATTTTCTACGTGTTTCTCTGCTTTGGCGTCCTGTACGTGAAGCT	7477	Hs.512714	GO:0001701|GO:0003338|GO:0003338|GO:0005109|GO:0005201|GO:0005576|GO:0005578|GO:0005615|GO:0005886|GO:0007257|GO:0007267|GO:0007275|GO:0007409|GO:0009798|GO:0009952|GO:0016055|GO:0016332|GO:0021871|GO:0022009|GO:0022009|GO:0030182|GO:0030324|GO:0032364|GO:0042476|GO:0042592|GO:0044237|GO:0045669|GO:0045669|GO:0045879|GO:0046330|GO:0048144|GO:0048568|GO:0050808|GO:0050808|GO:0060070|GO:0060070|GO:…	protein Wnt-7b precursor	18.9734	98.31	4.68523	6.24868	15.1997	22.0527	19.6678	102.208	101.137	91.5853	4.50814	4.57201	4.97555	6.22551	6.40518	6.11535
ASHGA5P022149	0.021179	0.0707605	2.19571	down	protein_coding	NM_032901	CCDS8800.1	COX14	RefSeq	754	chr12	+	50505763	50514240		CAGCATCCAGGGGACAAGATGCCAACTGGCAAGCAGCTAGCTGACATTGGCTATAAGACC	84987	Hs.388645	GO:0005739|GO:0016021|GO:0031966|GO:0033617|GO:0033617	cytochrome c oxidase assembly protein COX14	1303.95	3268.73	10.2728	11.4075	974.988	1909.05	1027.81	2955.33	2330.96	4519.92	10.0312	10.5399	10.2474	11.2439	11.0424	11.9363
ASHGA5P045777	0.02605	0.081209	2.26266	down	protein_coding	ENST00000376708	CCDS35045.1	FOXB2	GENCODE	1299	chr9	+	79634570	79635869		AAGCACCCCTTTGCCATTGAGAACATTATTGGCCGGGACTACAAGGGCGTGCTGCAGGCT	442425	Hs.553843	GO:0007420|GO:0006355|GO:0007389|GO:0009790|GO:0051090|GO:0009888|GO:0005667|GO:0003700|GO:0003690|GO:0043565|GO:0008134|GO:0003705|GO:0008301	forkhead box B2 [Source:HGNC Symbol;Acc:23315]	9.36335	40.7997	3.73583	4.91386	7.9283	7.81193	12.3498	42.2988	41.2654	38.8349	3.64587	3.20494	4.3567	4.88351	5.03552	4.82254
ASHGA5P052846	5.46342e-05	0.00319434	2.84029	down	protein_coding	NM_014702	CCDS34531.1	KIAA0408	RefSeq	8124	chr6	-	127759550	127780535		TAAAAGTGGTGAAGGTTTCAAAGGGACTTGTCAGTACTGCTCTGTGGAATGGTTGGACTT	9729		GO:0005515	uncharacterized protein KIAA0408	5	22.1895	2.45604	3.96208	5	5	5	25.0522	21.3224	20.194	2.46913	2.40305	2.49594	4.07275	4.00302	3.81046
ASHGA5P008015	0.0005619	0.00908203	2.38113	down	protein_coding	NM_001142417	CCDS4928.1	CRISP2	RefSeq	1387	chr6	-	49660070	49681303	NM_001142408, NM_003296	GAAAACCAACATTTCCAGCAATGGCTTTACTACCGGTGTTGTTTCTGGTTACTGTGCTGC	7180	Hs.2042	GO:0005615	cysteine-rich secretory protein 2 precursor	5	19.0274	2.45604	3.70769	5	5	5	20.2569	15.335	21.4902	2.46913	2.40305	2.49594	3.73264	3.48487	3.90555
ASHGA5P013702	0.0288118	0.0869827	2.32787	down	protein_coding	NM_001128915	CCDS46616.1	CYP24A1	RefSeq	3089	chr20	-	52769987	52790516		AATATGCTTTACCCAAAGGAATTGTCCGCAAATACGACATCCAGGCCACAGACAATGAGC	1591	Hs.89663	GO:0001649|GO:0005506|GO:0005743|GO:0006766|GO:0006805|GO:0008202|GO:0008403|GO:0009055|GO:0016491|GO:0020037|GO:0030342|GO:0033280|GO:0042359|GO:0042369|GO:0044281|GO:0055114|GO:0070561|GO:0070561	1,25-dihydroxyvitamin D(3) 24-hydroxylase, mitochondrial isoform 2 precursor	6.74546	23.7057	2.84725	4.06626	5	10.2364	5	24.911	22.4456	23.7605	2.46913	3.57668	2.49594	4.06543	4.07969	4.05367
ASHGA5P001301	6.09324e-05	0.00329051	3.65713	down	protein_coding	NM_052964	CCDS47024.1	CLNK	RefSeq	1710	chr4	-	10491837	10686386		ACTCAAGAGATTCCACTTGCCATTAGCAGTTCTTCATTCACGACAAGCAACCACAGTGTG	116449	Hs.678910	GO:0005070|GO:0005622|GO:0006955|GO:0007169|GO:0035556	cytokine-dependent hematopoietic cell linker	5	28.0801	2.45604	4.32676	5	5	5	25.8983	28.1861	30.1559	2.46913	2.40305	2.49594	4.12179	4.43386	4.42462
ASHGA5P052759	0.000178239	0.00529813	2.53089	down	protein_coding	NM_145740	CCDS4945.1	GSTA1	RefSeq	1276	chr6	-	52656177	52668664		GATCTGATGTGAATTCAGATTTCCAATCTTCTCCTAGCCAACCATTTTCCTGGAATTAAA	2938	Hs.446309	GO:0004364|GO:0004364|GO:0005737|GO:0005829|GO:0006749|GO:0006805|GO:0008152|GO:0044281	glutathione S-transferase A1	27.4955	115.647	5.14869	6.48833	22.753	37.5627	22.1708	110.905	109.976	126.06	5.04226	5.26961	5.1342	6.34127	6.5376	6.58611
ASHGA5P054244	0.0140887	0.0541967	2.03206	down	protein_coding	NM_172362	CCDS1496.1	KCNH1	RefSeq	8106	chr1	-	210851656	211307457		TTTGAGAACGTGGATGAGGTTAGTGCCTTTATGGGTGATCCAGGGAAGATTGGTTTTGCT	3756	Hs.553187	GO:0000155|GO:0005251|GO:0005515|GO:0005516|GO:0005637|GO:0005886|GO:0006355|GO:0006813|GO:0007268|GO:0007520|GO:0008076	potassium voltage-gated channel subfamily H member 1 isoform 1	5	16.4563	2.45604	3.47899	5	5	5	13.9104	20.7412	14.7174	2.46913	2.40305	2.49594	3.15554	3.95729	3.32413
ASHGA5P052539	0.00352766	0.0236234	3.49919	down	protein_coding	NM_001164444	CCDS47354.1	CBY3	RefSeq	810	chr5	-	179105558	179107975		TCATGATCCAGCCGTGCGCTCTGGACTCGCAGTGACGCAATAAAGGCCGCGCTACGCATG	646019	Hs.535767		protein chibby homolog 3	5	27.5071	2.45604	4.26306	5	5	5	20.8807	35.3499	26.2907	2.46913	2.40305	2.49594	3.78403	4.79221	4.21295
ASHGA5P050972	0.00646299	0.033341	2.14239	down	protein_coding	NM_016558	CCDS13269.1	SCAND1	RefSeq	1388	chr20	-	34541538	34543281	NM_033630	CACTGGCTGAGCGGTGGAGCTGCGGGCGGCCAGGGCCGGGCGCTCTGTGCGGACTGGGGC	51282	Hs.584909	GO:0003700|GO:0003713|GO:0005634|GO:0016032|GO:0042802	SCAN domain-containing protein 1 isoform 1	737.727	1840.51	9.48214	10.5814	674.177	964.718	574.287	1622.4	1462.71	2436.44	9.51481	9.52842	9.40321	10.3656	10.3829	10.9955
ASHGA5P053173	0.00109538	0.0125046	2.56226	down	protein_coding	NM_198901	CCDS47638.1	SRI	RefSeq	2012	chr7	-	87834431	87856308	NM_001256892	AGAAGGCAATCCTCTAAGGATCACCAGCTTCTACCTATAAGACTTCAACTCAAGATGCAG	6717	Hs.489040	GO:0001508|GO:0005102|GO:0005246|GO:0005509|GO:0005515|GO:0005737|GO:0005886|GO:0006810|GO:0006816|GO:0006880|GO:0006942|GO:0007165|GO:0007507|GO:0007517|GO:0008016|GO:0030018|GO:0031982|GO:0033017|GO:0046982	sorcin isoform B	5	20.2681	2.45604	3.81346	5	5	5	18.3184	22.88	19.6058	2.46913	2.40305	2.49594	3.56612	4.11042	3.76385
ASHGA5P003483	0.0252712	0.0794458	2.43621	down	protein_coding	NM_005640	CCDS42421.1	TAF4B	RefSeq	4777	chr18	+	23806408	23971650		AACATCATGCTTCCGAGATGAGGATGACATCAATGATGTGACTTCTATGGCAGGGGTCAA	6875	Hs.369519	GO:0003677|GO:0003700|GO:0005634|GO:0005634|GO:0005654|GO:0005669|GO:0005730|GO:0005730|GO:0005737|GO:0006352|GO:0006355|GO:0006366|GO:0006367|GO:0006368|GO:0010467|GO:0016032|GO:0046982|GO:0051059	transcription initiation factor TFIID subunit 4B	6.69755	24.5755	2.83967	4.12431	5	10.0926	5	24.993	25.8408	22.8927	2.46913	3.55393	2.49594	4.07039	4.30291	3.99961
ASHGA5P026786	4.7894e-05	0.00305307	3.35014	down	protein_coding	NM_001101389	CCDS44736.1	CLDN25	RefSeq	690	chr11	+	113650517	113651207		TTTGCTCTGCAGCTTTGGGTCTGAATGCTTCCAGTTTCACAGGATCAGATGGGTATTCAA	644672	Hs.705360	GO:0005198|GO:0005923|GO:0016021	putative claudin-25	15.6736	94.1489	4.43283	6.17705	13.8025	18.6051	14.6131	107.638	81.915	92.894	4.37696	4.35313	4.56841	6.30175	6.09371	6.1357
ASHGA5P054581	0.00429151	0.0261459	2.15379	down	protein_coding	NM_001136200	CCDS7542.2	C10orf32	RefSeq	2450	chr10	+	104613966	104624718		AGAATGACATGTAAGAGTGCTGTAGGACTCCTTTGCCTAATGCTGAGGAGTAAATACCTT	119032	Hs.34492		UPF0693 protein C10orf32	3514.87	8355.91	11.709	12.8159	2913.59	4785.85	2845.16	7794.56	7257.78	10015.4	11.5412	11.9153	11.6707	12.6619	12.6607	13.1252
ASHGA5P008403	0.00889182	0.0406173	2.21573	down	protein_coding	NM_014734	CCDS9796.1	KIAA0247	RefSeq	5393	chr14	+	70078309	70181861		TTATCCCTCACGTCAGAGGAGTACACAGATGATATTCCACTGTTGAAAGAAGCATGAGGG	9766	Hs.440025	GO:0003674|GO:0005575|GO:0008150|GO:0016021	uncharacterized protein KIAA0247 precursor	5	17.8323	2.45604	3.60382	5	5	5	13.6301	19.4163	20.4503	2.46913	2.40305	2.49594	3.12513	3.85491	3.83142
ASHGA5P053724	0.0364639	0.101841	2.32953	down	protein_coding	NM_004293	CCDS6641.1	GDA	RefSeq	5477	chr9	+	74764266	74867140	NM_001242506, NM_001242507	CCAGCTCAGTGTAAGACCCTCGGGCGTCTACAAAGTTCTCCTGGGATTAGCGTGGTTCTG	9615	Hs.494163	GO:0005622|GO:0005829|GO:0006139|GO:0006144|GO:0006147|GO:0006195|GO:0007399|GO:0008270|GO:0008892|GO:0044281|GO:0055086	guanine deaminase isoform b	6.80905	23.9473	2.85442	4.07446	5	10.4271	5	21.5247	22.8509	27.4665	2.46913	3.5982	2.49594	3.83195	4.10881	4.28263
ASHGA5P031628	0.0183752	0.0644517	2.58836	down	protein_coding	NM_001169	CCDS10626.1	AQP8	RefSeq	1315	chr16	+	25228284	25240253		TTCCCAGCAGCTCAGGCAAGAGTCCGATGTTTGTGCCATCTGATCCTGATGTCTGGAGAG	343	Hs.176658	GO:0005886|GO:0005887|GO:0006810|GO:0006833|GO:0015250|GO:0015722|GO:0045177|GO:0046691|GO:0055085|GO:0071320	aquaporin-8	15.0644	66.1503	4.27602	5.64806	7.57471	21.0388	16.5798	70.0861	64.968	63.3969	3.58099	4.51252	4.73454	5.6529	5.73101	5.56027
ASHGA5P011895	0.00840316	0.0390437	2.58645	down	protein_coding	NM_032340	CCDS4784.1	MNF1	RefSeq	535	chr6	-	33665345	33679504		CAAACACAAGTACCCTCGCCCCAGAGACACCAGCTTCAGTGGCCTGTCGTTGGAAGAGTA	84300	Hs.740562	GO:0005634|GO:0005737|GO:0005739|GO:0042645	mitochondrial nucleoid factor 1	2309.45	6706.1	11.097	12.468	1802.98	3395.13	1730.24	6509.27	4866.92	8742.11	10.909	11.3801	11.002	12.4041	12.0811	12.9188
ASHGA5P053344	0.0093503	0.0418951	2.17897	down	protein_coding	NM_019841	CCDS5875.1	TRPV5	RefSeq	2486	chr7	-	142605647	142630820		GGATGGAGAGGAGGTCTACCATTTTTGATTAACATCGCTATCACTCTTGACCTTACTCCC	56302	Hs.283369	GO:0005262|GO:0005516|GO:0005887|GO:0006816|GO:0006816|GO:0016324|GO:0051262	transient receptor potential cation channel subfamily V member 5	5	17.8557	2.45604	3.57969	5	5	5	21.2987	11.9694	20.299	2.46913	2.40305	2.49594	3.81502	3.10412	3.81992
ASHGA5P051106	0.000289106	0.00660441	2.00728	down	protein_coding	NM_172212	CCDS816.1	CSF1	RefSeq	2772	chr1	+	110453232	110469365	NM_000757	TTAACTCCGTTCCTTTGACTGACACAGGCCATGAGAGGCAGTCCGAGGGATCCTTCAGCC	1435	Hs.173894	GO:0001503|GO:0001954|GO:0003006|GO:0005125|GO:0005157|GO:0005157|GO:0005615|GO:0005886|GO:0006954|GO:0008083|GO:0008083|GO:0008283|GO:0008284|GO:0008284|GO:0010628|GO:0010743|GO:0010744|GO:0016020|GO:0016021|GO:0030097|GO:0030154|GO:0030225|GO:0030278|GO:0030316|GO:0030335|GO:0032270|GO:0032946|GO:0040018|GO:0042117|GO:0042476|GO:0042488|GO:0042803|GO:0043235|GO:0045087|GO:0045651|GO:0045657|GO:…	macrophage colony-stimulating factor 1 isoform a precursor	5	16.0762	2.45604	3.46129	5	5	5	15.8858	16.7205	15.6222	2.46913	2.40305	2.49594	3.35525	3.61834	3.41027
ASHGA5P009360	0.0141965	0.0545079	2.32576	down	protein_coding	ENST00000354591	CCDS53873.1	DACH1	GENCODE	4633	chr13	-	72012097	72441330		ATTCCACCAACAGATGAGACCCCGCTTTCTACACCAACCGCAAGAGACAGCCTTGACAAA	1602	Hs.129452	GO:0005634|GO:0000166	dachshund homolog 1 (Drosophila) [Source:HGNC Symbol;Acc:2663]	891.071	2292.53	9.69142	10.9091	718.983	1387.43	566.798	2436.69	1623.35	2817.56	9.59489	10.0929	9.38647	10.9717	10.5272	11.2284
ASHGA5P013757	0.0117201	0.0479445	2.04891	down	protein_coding	NM_002468	CCDS2674.2	MYD88	RefSeq	2862	chr3	+	38179968	38184512	NM_001172567	TTGATGACCCCCTGGGGCATATGCCTGAGCGTTTCGATGCCTTCATCTGCTATTGCCCCA	4615	Hs.82116	GO:0002224|GO:0002238|GO:0002755|GO:0005121|GO:0005123|GO:0005515|GO:0005829|GO:0005886|GO:0006954|GO:0007165|GO:0007166|GO:0007254|GO:0008063|GO:0009615|GO:0010008|GO:0016064|GO:0019221|GO:0031663|GO:0032494|GO:0032740|GO:0032747|GO:0032755|GO:0032760|GO:0034130|GO:0034134|GO:0034142|GO:0042802|GO:0043123|GO:0044130|GO:0045080|GO:0045087|GO:0045351|GO:0045944|GO:0046330|GO:0048011|GO:0048661|GO:…	myeloid differentiation primary response protein MyD88 isoform 2	24.8884	81.4157	4.92969	5.96455	17.1733	41.0146	16.4772	81.203	74.6428	88.4014	4.67535	5.38709	4.72664	5.87963	5.95031	6.06372
ASHGA5P032717	0.00376958	0.0245068	2.61839	down	protein_coding	NM_005782	CCDS32768.2	ALYREF	RefSeq	1113	chr17	-	79845710	79849462		ATTCAAAGCAGCAGCTTTCGGCAGAGGAGCTGGATGCCCAGCTGGACGCCTATAATGCGA	10189	Hs.534385	GO:0000166|GO:0000346|GO:0000398|GO:0000398|GO:0003723|GO:0005515|GO:0005634|GO:0005654|GO:0005730|GO:0005829|GO:0006366|GO:0006369|GO:0006406|GO:0006406|GO:0008380|GO:0010467|GO:0016607|GO:0031124|GO:0046784|GO:0071013	THO complex subunit 4	912.154	2649.42	9.74388	11.1326	615.415	1375.42	745.627	2952.18	2707.01	2289.06	9.38443	10.0759	9.7713	11.2415	11.2488	10.9074
ASHGA5P055334	0.000656928	0.00970654	2.12141	down	protein_coding	NM_021821	CCDS8714.1	MRPS35	RefSeq	1919	chr12	+	27863705	27909237		ATTAATTAAACTTGTAGGAGAGCGATACTGCAAGACCACAGATGTGCTTACCATCAAAAC	60488	Hs.731634	GO:0005763|GO:0005763|GO:0042769|GO:0043043	28S ribosomal protein S35, mitochondrial isoform 1	1476.94	3575.86	10.5066	11.5916	1264.39	1829.74	1336.68	4023.42	3566.18	3137.98	10.4208	10.4776	10.6214	11.7227	11.6474	11.4048
ASHGA5P008576	0.000335787	0.00702454	4.79378	down	protein_coding	NM_201284	CCDS5515.1	EGFR	RefSeq	2865	chr7	+	55086724	55238738		GCACCTACGGGCCAGGAAATGAGAGTCTCAAAGCCATGTTATTCTGCCTTTTTAAACTAT	1956	Hs.488293	GO:0000139|GO:0000165|GO:0000186|GO:0001503|GO:0001892|GO:0001942|GO:0003690|GO:0004709|GO:0004713|GO:0004713|GO:0004713|GO:0004714|GO:0004716|GO:0004888|GO:0005006|GO:0005006|GO:0005515|GO:0005524|GO:0005615|GO:0005634|GO:0005737|GO:0005768|GO:0005789|GO:0005886|GO:0005886|GO:0006950|GO:0007165|GO:0007165|GO:0007166|GO:0007173|GO:0007173|GO:0007202|GO:0007411|GO:0007435|GO:0008283|GO:0008284|GO:…	epidermal growth factor receptor isoform d precursor	5.51323	40.7806	2.65062	4.91179	5	6.53968	5	39.9821	43.7401	38.6196	2.46913	2.98679	2.49594	4.80009	5.12054	4.81473
ASHGA5P051459	0.00810305	0.0381067	2.22892	down	protein_coding	NM_001106	CCDS2679.1	ACVR2B	RefSeq	11373	chr3	+	38495789	38534633		CTAAGCCCAGGACATGAGTGTCTGTCCAGACTCAGTGGATCTGAAGAAAAAAGGAAAAAA	93	Hs.174273	GO:0001702|GO:0001822|GO:0001946|GO:0001974|GO:0004674|GO:0004674|GO:0004702|GO:0004712|GO:0005024|GO:0005515|GO:0005524|GO:0005737|GO:0005886|GO:0005887|GO:0006355|GO:0007165|GO:0007178|GO:0007368|GO:0007498|GO:0007507|GO:0009749|GO:0009791|GO:0009952|GO:0009986|GO:0016362|GO:0019838|GO:0030073|GO:0030324|GO:0030501|GO:0030509|GO:0030509|GO:0030509|GO:0031016|GO:0032147|GO:0032927|GO:0035265|GO:…	activin receptor type-2B precursor	690.432	1788.4	9.4063	10.5626	803.858	708.748	558.689	1602.08	1999.39	1763.74	9.7532	9.09837	9.36731	10.3493	10.8283	10.5103
ASHGA5P033918	0.00118479	0.0130615	2.01807	down	protein_coding	NM_171999	CCDS12013.1	SALL3	RefSeq	5550	chr18	+	76740274	76758969		TACTGACACACAGATTGAAAGAGCTGCCTTCTCAGTTATTTGACCCCAACTTTGCTCTAG	27164	Hs.700557	GO:0003677|GO:0005634|GO:0006351|GO:0006355|GO:0008270|GO:0021891|GO:0035136|GO:0035137|GO:0045879	sal-like protein 3	22.5944	79.0283	4.90853	5.9215	19.3712	28.8824	19.5297	84.9757	82.4365	69.6727	4.83127	4.92878	4.96554	5.95492	6.1041	5.70549
ASHGA5P008249	4.4262e-05	0.0029626	2.19738	down	protein_coding	NM_016357	CCDS8802.1	LIMA1	RefSeq	3745	chr12	-	50569562	50677353	NM_001113546	GAAACAAACATGGAGAAGAAGAGAAGTAACACCGAAAATCTCTCCCAGCACTTTAGAAAG	51474	Hs.525419	GO:0001725|GO:0003785|GO:0005737|GO:0005886|GO:0005925|GO:0008270|GO:0015629|GO:0030835|GO:0031529|GO:0051015|GO:0051017	LIM domain and actin-binding protein 1 isoform 2	520.158	1336.79	9.0097	10.1455	432.18	674.113	454.181	1386.52	1208.34	1415.5	8.91182	9.02676	9.09053	10.1358	10.102	10.1987
ASHGA5P007944	0.0185505	0.0648354	3.07491	down	protein_coding	NM_013322	CCDS5399.1	SNX10	RefSeq	2591	chr7	+	26331514	26413949	NM_001199835	ACAGAAAGAGGAATTTGTAAGTGTCTGGGTTCGAGATCCTAGGATTCAGAAGGAGGACTT	29887	Hs.520714	GO:0005545|GO:0007032|GO:0007154|GO:0015031|GO:0031313	sorting nexin-10 isoform 1	6.69158	31.307	2.83865	4.4592	5	10.0747	5	41.0883	29.0607	23.7721	2.46913	3.55089	2.49594	4.84123	4.48218	4.05418
ASHGA5P013165	0.0327082	0.0947109	2.45906	down	protein_coding	NM_000947		PRIM2	RefSeq	2353	chr6	+	57182421	57513376		TTGCCTGAAGATTATTCTATCCAATCCACCAAGCCAAGGGGATTATCATGGGTGCCCATT	5558	Hs.654580	GO:0000082|GO:0000084|GO:0000216|GO:0000278|GO:0000722|GO:0000723|GO:0003677|GO:0003896|GO:0005654|GO:0005658|GO:0006269|GO:0006270|GO:0006271|GO:0032201|GO:0046872|GO:0051539	DNA primase large subunit	80.6695	284.142	6.52098	7.81909	47.3952	102.141	92.472	359.559	296.655	196.211	6.00861	6.54424	7.01009	8.14793	8.05408	7.25525
ASHGA5P029294	9.77321e-05	0.00410757	3.91442	down	protein_coding	NM_021161	CCDS9880.1	KCNK10	RefSeq	7518	chr14	-	88646451	88793256		GCTTGGAGCGGCATCTTTCTTGGATGTTTTTTCTCTACACAGACTTCTTTCTTTCCTTGG	54207	Hs.560255	GO:0005244|GO:0005267|GO:0005886|GO:0006810|GO:0007165|GO:0007268|GO:0016021	potassium channel subfamily K member 10 isoform 1 precursor	11.0301	79.5272	3.96469	5.93349	11.3865	13.0828	8.6211	77.8972	83.8321	76.8523	4.12229	3.89516	3.8766	5.82148	6.12894	5.85004
ASHGA5P007522	0.037449	0.103514	2.02347	down	protein_coding	NM_017954	CCDS55158.1	CADPS2	RefSeq	6074	chr7	-	121958477	122526813	NM_001167940	AGCCTGTCAAGAATATCGCCAACAGTCTTCCCAATGTAGCTCTTCCAAAAGTTCCAAGTC	93664	Hs.740589	GO:0005543|GO:0015031|GO:0016082|GO:0030054|GO:0030659|GO:0042734|GO:0045211|GO:0045921|GO:0046872	calcium-dependent secretion activator 2 isoform a	26.597	87.0735	5.04423	6.06107	14.1339	37.4853	28.1717	99.9484	81.141	80.1312	4.41057	5.26788	5.45424	6.19357	6.07868	5.91094
ASHGA5P001005	1.72339e-05	0.00231359	2.53601	down	protein_coding	NM_152503		C20orf132	RefSeq	3481	chr20	-	35729628	35807974		TCCTTGCCAACGCATTGCTGGAAAGAAATCAGCTCCTTGCACAGAAGGTCATGTACTTAT	140699	Hs.740596		uncharacterized protein C20orf132 isoform 1	5	19.9934	2.45604	3.7986	5	5	5	22.027	17.6735	20.2796	2.46913	2.40305	2.49594	3.87035	3.70732	3.81814
ASHGA5P012842	0.00735076	0.0359959	2.43629	down	protein_coding	NM_004520	CCDS3980.2	KIF2A	RefSeq	4058	chr5	+	61601988	61683011	NM_001098511, NM_001243952	AAGGAATTTGGACCCCCTTCACGTAGAAAATCTAATTGTGTGAAAGAAGTAGAAAAACTG	3796	Hs.558351	GO:0000087|GO:0000236|GO:0000278|GO:0000922|GO:0003774|GO:0003777|GO:0005515|GO:0005524|GO:0005813|GO:0005829|GO:0005876|GO:0007018|GO:0007052|GO:0007399|GO:0007596|GO:0019886|GO:0030154|GO:0051301	kinesin-like protein KIF2A isoform 1	239.633	695.049	7.91397	9.19866	215.176	360.143	143.581	815.275	722.418	547.453	7.97732	8.18285	7.58175	9.37915	9.38802	8.82881
ASHGA5P012735	3.62258e-06	0.00166562	2.00703	down	protein_coding	NM_001029989	CCDS32269.1	KIAA0101	RefSeq	1345	chr15	-	64657210	64673702		TCGAGGAAAGAGCATGTCCTTTGCAACCTGATCACACAAATGATGAAAAAGAATAGAACT	9768	Hs.81892	GO:0005634|GO:0005739	PCNA-associated factor isoform 2	28669.5	70633.7	14.8992	15.9042	29156.5	31918.5	24933.4	69478.4	75816.3	66606.5	14.9188	14.8935	14.8852	15.88	15.9565	15.8761
ASHGA5P018220	0.0280164	0.0852485	2.19404	down	protein_coding	NM_001136140	CCDS44135.1	CMPK1	RefSeq	2809	chr1	+	47799468	47844511		CATCGTCGAGGAAATGGATCAGACAATGGCTGCCAATGCTCAGAAGAATAAATTCTTGAT	51727	Hs.731647	GO:0004127|GO:0004849|GO:0005524|GO:0005634|GO:0005737|GO:0005829|GO:0006222|GO:0009220|GO:0015949|GO:0016776|GO:0044281|GO:0055086	UMP-CMP kinase isoform b	976.113	2314.12	9.77833	10.9119	603.427	1625.26	699.653	3037.44	1975.39	1929.52	9.35994	10.3007	9.67431	11.2824	10.8099	10.6435
ASHGA5P002743	0.00477189	0.0278501	4.67967	down	protein_coding	NM_006815	CCDS9250.1	TMED2	RefSeq	2126	chr12	+	124069075	124082688		AACAGGAATACATGGAAGTCCGGGAGAGAATACACAGAGCCATCAACGACAACACAAACA	10959	Hs.740378	GO:0001893|GO:0005515|GO:0005783|GO:0005789|GO:0005793|GO:0005794|GO:0006886|GO:0006888|GO:0007030|GO:0016021|GO:0030137|GO:0030663|GO:0032580|GO:0033116|GO:0034260|GO:0035459|GO:0042589|GO:0043231|GO:0048205|GO:0048208|GO:0048598|GO:0072661	transmembrane emp24 domain-containing protein 2 precursor	277.734	1634.94	8.15885	10.3853	185.426	320.358	327.418	2074.47	1755.39	1074.96	7.78881	8.0275	8.66025	10.7193	10.6379	9.79865
ASHGA5P043377	0.0314453	0.0922381	2.99308	down	protein_coding	ENST00000547270	CCDS34765.1	TAS2R38	GENCODE	1143	chr7	-	141672430	141673573		TGAGAATGGACATGAAATGAGCTCTTCATTAATACGCCTGTGAGTCTTCATAAATATGCC	5726	Hs.647085	GO:0007186|GO:0050909|GO:0016021|GO:0004930	taste receptor, type 2, member 38 [Source:HGNC Symbol;Acc:9584]	6.97464	35.9363	3.1378	4.71943	5	5.84965	10.0743	35.7668	35.8943	36.1478	2.46913	2.86608	4.0782	4.62876	4.81675	4.71278
ASHGA5P043805	0.000234921	0.00602211	2.37998	down	protein_coding	NM_022820	CCDS5675.1	CYP3A43	RefSeq	2167	chr7	+	99425635	99464173	NM_057095	AAACTTGCTGTCATTAGAGCACTGCAGAACTTCTCCTTCAAACCTTGTAAAGAGACTCAG	64816	Hs.306220	GO:0004497|GO:0005506|GO:0005789|GO:0006805|GO:0009055|GO:0020037|GO:0044281|GO:0070330	cytochrome P450 3A43 isoform 1	17.6309	74.1647	4.5736	5.82455	16.0164	22.9226	13.9536	69.7385	75.4341	77.3214	4.58066	4.62619	4.51396	5.64616	5.96802	5.85948
ASHGA5P002153	0.00101867	0.0120688	2.17989	down	protein_coding	NM_003626	CCDS31627.1	PPFIA1	RefSeq	5353	chr11	+	70116805	70230607	NM_177423	TCATGACCCTTTTGCCACCTTCCAGAGAAGAGGTACGAGATGACAAGACAACCATAAAGT	8500	Hs.530749	GO:0004871|GO:0005515|GO:0005737|GO:0007160|GO:0007165	liprin-alpha-1 isoform b	35.674	123.123	5.46346	6.58772	31.1835	51.2101	24.6282	125.341	123.557	120.47	5.45611	5.66415	5.27013	6.52921	6.71808	6.51587
ASHGA5P051664	0.00218898	0.0181579	3.0858	down	protein_coding	ENST00000249910	CCDS3058.1	MBD4	GENCODE	2470	chr3	-	129149792	129158852		AAATGGACAACAACTGCTCACCAACCAGGAAAGACTTCACTGGTGAGAAAATATTTCAAG	8930	Hs.35947	GO:0006281|GO:0006284|GO:0008630|GO:0009314|GO:0006285|GO:0045008|GO:0006974|GO:0005634|GO:0005737|GO:0005654|GO:0000785|GO:0003677|GO:0005515|GO:0003824|GO:0004520|GO:0003696	methyl-CpG binding domain protein 4 [Source:HGNC Symbol;Acc:6919]	2819.64	9851.18	11.4085	13.0341	2425.03	3568.18	2465.72	12250.1	10241.4	7062.02	11.3006	11.4583	11.4666	13.3588	13.1435	12.6
ASHGA5P013262	0.000943744	0.0116759	2.25073	down	protein_coding	NM_001007255	CCDS41425.1	KLHDC9	RefSeq	1348	chr1	+	161068180	161070138	NR_033386	CATGGGAAAATTAAGTCCTTTCTTTCTCCCCAAGGAGGAACCACCTGTTGCTCCTCATTT	126823	Hs.507290		kelch domain-containing protein 9 isoform b	437.079	1140.08	8.75437	9.92477	319.459	605.991	385.786	1164.33	1006.36	1249.55	8.50463	8.88084	8.87765	9.89917	9.85689	10.0182
ASHGA5P032760	0.024969	0.0788052	3.04451	down	protein_coding	ENST00000304094	CCDS11022.1	OR1A1	GENCODE	930	chr17	+	3118914	3119844		ATTTCCGCCCTTTGACCAATTATAGCCTAAAAGACGCAGTGATCACTGTAATGTACACGG	8383	Hs.532688	GO:0007186|GO:0007608|GO:0050911|GO:0016021|GO:0005886|GO:0004930|GO:0004984	olfactory receptor, family 1, subfamily A, member 1 [Source:HGNC Symbol;Acc:8179]	6.79003	38.7709	3.22096	4.82717	9.66426	5	5.70582	40.6774	42.1562	33.479	3.90399	2.40305	3.35584	4.82476	5.0653	4.59146
ASHGA5P032169	0.0236193	0.0758413	2.55226	down	protein_coding	NM_002470	CCDS11157.1	MYH3	RefSeq	6061	chr17	-	10531842	10560626		AGAAAGCATAGTATCCCAACTTTCCAGGAGCAAGCAAGCCTTTACCCAGCAAACAGAAGA	4621	Hs.440895	GO:0000146|GO:0003779|GO:0005516|GO:0005524|GO:0005829|GO:0007517|GO:0030016|GO:0030048|GO:0030049|GO:0032982	myosin-3	7.15308	32.2089	3.1878	4.53958	5	9.23198	7.22724	35.5181	32.7359	28.3726	2.46913	3.43682	3.65746	4.61977	4.66849	4.33048
ASHGA5P046693	0.0184795	0.0646812	2.61108	down	protein_coding	ENST00000286437	CCDS55521.1	AFF2	GENCODE	12280	chrX	+	147800614	148082193		TCTTGATCCATGAAGTTCAAAAGGAGGCACCAAGCATTTCCGTCCTTCTTCAAGATGAAG	2334	Hs.496911	GO:0007420|GO:0006397|GO:0008380|GO:0043484|GO:0007611|GO:0016607|GO:0002151	AF4/FMR2 family, member 2 [Source:HGNC Symbol;Acc:3776]	5.68996	25.5548	2.79699	4.18164	7.06988	5	5	24.705	26.8754	25.0839	3.49199	2.40305	2.49594	4.04816	4.36037	4.1364
ASHGA5P037437	0.0052774	0.0294385	3.69578	down	protein_coding	NM_181600	CCDS13592.1	KRTAP13-4	RefSeq	483	chr21	+	31802593	31803076		TGGCAGTCTTCTTGTTACAGACCAATCTGTGGATCTCGCTTCTATCAATTCACCTGCTAA	284827	Hs.553677	GO:0005882	keratin-associated protein 13-4	6.55344	41.7307	3.05327	4.93915	5	9.63703	5.02328	35.6814	43.7635	45.7472	2.46913	3.4886	3.20208	4.62549	5.12097	5.07098
ASHGA5P054515	2.18571e-05	0.00248377	2.19038	down	protein_coding	NM_001080116	CCDS41545.1	LDB3	RefSeq	1659	chr10	+	88428320	88459810		TTGTCTGCAGAGGCGGCCGCTGACAGCACCAGCATGTCTTACAGTGTGACCCTGACTGGG	11155	Hs.657271	GO:0005080|GO:0005515|GO:0005856|GO:0008092|GO:0008270|GO:0030018|GO:0031143|GO:0048471	LIM domain-binding protein 3 isoform 4	5	17.4892	2.45604	3.58722	5	5	5	18.1692	15.8776	18.4209	2.46913	2.40305	2.49594	3.55295	3.5395	3.66922
ASHGA5P053795	1.31129e-05	0.00216313	5.85742	down	protein_coding	ENST00000367364	CCDS44291.1	PTPRC	GENCODE	1017	chr1	+	198608226	198662335	NM_001267798, NM_002838, NM_080921	ATGTATTTGTGGCTTAAACTCTTGGCATTTGGCTTTGCCTTTCTGGACACAGAAGTATTT	5788	Hs.654514	GO:0004872	protein tyrosine phosphatase, receptor type, C [Source:HGNC Symbol;Acc:9666]	5	43.406	2.45604	5.00631	5	5	5	40.6354	44.2427	45.34	2.46913	2.40305	2.49594	4.82299	5.13667	5.05927
ASHGA5P003166	0.00284785	0.0211447	2.38963	down	protein_coding	NM_004932	CCDS3894.1	CDH6	RefSeq	8571	chr5	+	31193761	31329253		CATCGTGATCCTACTAGTGACAGTGGTGCTGTTTGCAGCTCTGAGGCGGCAGCGAAAAAA	1004	Hs.124776	GO:0005509|GO:0005634|GO:0005730|GO:0005737|GO:0005886|GO:0005886|GO:0007155|GO:0007156|GO:0016021|GO:0034329|GO:0034332|GO:0045216	cadherin-6 preproprotein	5.60935	21.6722	2.66846	3.92525	5	6.82805	5	21.9546	19.8132	23.2489	2.46913	3.04031	2.49594	3.86567	3.88631	4.02376
ASHGA5P038382	0.000615951	0.00948503	2.36371	down	protein_coding	NM_001146102	CCDS3014.1	PARP9	RefSeq	3177	chr3	-	122246759	122283147	NM_031458	TTGCTCAGATCTTTCCTCAGTGGAGAAAGGGGAATACAGAAGAATGTCTCCCCTACAAGT	83666	Hs.518200	GO:0003950|GO:0005515|GO:0005634|GO:0005634|GO:0005737|GO:0005829|GO:0016477|GO:0060330	poly [ADP-ribose] polymerase 9 isoform a	803.526	2121.26	9.57775	10.8188	606.877	1158.64	645.063	2176.26	1986.14	2201.38	9.36968	9.80457	9.55899	10.7886	10.8192	10.8486
ASHGA5P049861	0.00111996	0.0126957	2.12396	down	protein_coding	NM_001143999	CCDS11752.1	SEC14L1	RefSeq	5542	chr17	+	75137004	75213181	NM_001143998, NM_001144001, NM_001204410, NM_003003	TGATCTCCAGGTAGTGCCGCGCTGCCTGCACCTAGTGTGCAGAGGGGACGGCCGCCCCTC	6397	Hs.464184	GO:0005794|GO:0006810|GO:0016020|GO:0016021	SEC14-like protein 1 isoform a	2684.07	6376.68	11.3366	12.4233	2477.12	3422.97	2152.11	6363.78	5433.08	7333.18	11.3237	11.3957	11.2904	12.3729	12.2343	12.6628
ASHGA5P052877	8.53858e-07	0.00125011	3.78743	down	protein_coding	ENST00000368115	CCDS1184.1	FCER1A	GENCODE	1165	chr1	+	159259503	159278014		TTCTTTGAAGTCAGTTCCACCAAATGGTTCCACAATGGCAGCCTTTCAGAAGAGACAAAT	2205	Hs.897	GO:0019370|GO:0007257|GO:0050731|GO:0043306|GO:0050850|GO:0001812|GO:0001820|GO:0045401|GO:0045425|GO:0038095|GO:0000187|GO:0007165|GO:0007166|GO:0005886|GO:0005887|GO:0009897|GO:0005515|GO:0019767|GO:0019863	Fc fragment of IgE, high affinity I, receptor for; alpha polypeptide [Source:HGNC Symbol;Acc:3609]	5	28.9369	2.45604	4.37726	5	5	5	29.4016	27.4954	29.9136	2.46913	2.40305	2.49594	4.32797	4.39324	4.41057
ASHGA5P006740	0.00766196	0.0367829	2.40106	down	protein_coding	NM_001017989	CCDS33052.1	OPA3	RefSeq	1962	chr19	-	46031024	46088122		CCGGCTCAACTGTACCACTGGCTGGAGATGCGGACCAAAATGCGCATCATGGGTTTCAAT	80207	Hs.466945	GO:0005739|GO:0005739|GO:0007601|GO:0050896	optic atrophy 3 protein isoform a	5.41257	21.7591	2.63519	3.89886	5	6.23772	5	21.9109	16.1614	27.2049	2.46913	2.9405	2.49594	3.86164	3.56681	4.26813
ASHGA5P039021	0.000151256	0.005002	2.69829	down	protein_coding	NM_181897	CCDS3088.1	PPP2R3A	RefSeq	4669	chr3	+	135741576	135866752		TGTGATTTTGTTCTCCCTTCACGGTTTAAGAAGCGGCTGAAGTCATTTCAGCAGACACAG	5523	Hs.518155	GO:0000159|GO:0000159|GO:0000159|GO:0001754|GO:0005509|GO:0005515|GO:0006470|GO:0007525|GO:0008601|GO:0045732|GO:0061053|GO:0090090|GO:0090244|GO:0090249|GO:0090263	serine/threonine-protein phosphatase 2A regulatory subunit B'' subunit alpha isoform 2	244.773	800.352	7.98332	9.41536	194.708	336.244	203.366	779.088	718.548	903.419	7.84561	8.0839	8.02044	9.31018	9.37915	9.55677
ASHGA5P000840	0.00382342	0.0246857	2.16292	down	protein_coding	ENST00000202816	CCDS13117.1	ESF1	GENCODE	3216	chr20	-	13694968	13765532		AAGACAAAAGGCTGAAATGGCTTTGCTTATGATGGATGAGGACGAGGACAGTAAGAAACA	51575	Hs.369284	GO:0006351|GO:0006355|GO:0005634|GO:0005730|GO:0005654	ESF1, nucleolar pre-rRNA processing protein, homolog (S. cerevisiae) [Source:HGNC Symbol;Acc:15898]	1842.62	4501.96	10.7892	11.9022	1386.75	2655.98	1485.13	5221.66	4525.68	3758.53	10.5533	11.0345	10.7799	12.0641	11.9786	11.6639
ASHGA5P039193	0.0154347	0.0571756	2.05087	down	protein_coding	NM_001163646	CCDS54685.1	HTR3D	RefSeq	1786	chr3	+	183750618	183757157		TCTCAGTCTCTGCTCACTACAGGAAATGGCGACACTTTGATTATCAATTGCCCAGGCTTT	200909	Hs.448004	GO:0005230|GO:0005886|GO:0016021|GO:0034220|GO:0055085	5-hydroxytryptamine receptor 3D isoform 3 precursor	10.6751	42.7703	3.9401	4.97634	10.2777	10.2096	11.538	36.6667	45.662	45.982	3.98688	3.57196	4.26148	4.66498	5.18561	5.07842
ASHGA5P008565	0.00341747	0.0233101	2.23403	down	protein_coding	NM_016648	CCDS3701.2	LARP7	RefSeq	2292	chr4	+	113558119	113578748	NR_049768	TGACCCTGTATTTTGGGAGTCGAACGGAGAATGGAAACTGAAAGTGGAAATCAGGAAAAG	51574	Hs.713663	GO:0000166|GO:0003723|GO:0005634|GO:0005654|GO:0005737|GO:0006396|GO:0030529	la-related protein 7 isoform 1	934.027	2426.94	9.84006	10.9997	943.669	1067.1	791.312	2306.87	2840.43	2133.51	9.98106	9.68166	9.85747	10.8806	11.3262	10.7923
ASHGA5P010714	0.00269545	0.0205174	2.39954	down	protein_coding	NM_001136223	CCDS44312.1	RCOR3	RefSeq	4474	chr1	+	211432707	211489725	NM_018254	TTCTAATGTGCCATCAGGGAAGAGCACTGATGAAGAAGAGGAGGCACAGACCCCACAGGC	55758	Hs.356399	GO:0003677|GO:0003682|GO:0005515|GO:0005634|GO:0006351|GO:0006355	REST corepressor 3 isoform a	247.67	741.686	8.03939	9.30214	260.826	275.145	207.039	780.113	812.695	632.25	8.24618	7.82912	8.04286	9.31199	9.55312	9.04131
ASHGA5P049267	0.000551562	0.00902808	2.33567	down	protein_coding	NM_001755	CCDS10827.1	CBFB	RefSeq	3181	chr16	+	67063049	67134958		GAGACAGGTCTCATCGGGAGGAAATGGAGGTGAGAGTTTCACAGCTGCTGGCAGTAACTG	865	Hs.460988	GO:0001649|GO:0003677|GO:0003700|GO:0003713|GO:0005515|GO:0005575|GO:0005634|GO:0006366|GO:0030098|GO:0030099|GO:0045944|GO:0048469|GO:0060216	core-binding factor subunit beta isoform 2	232.784	676.41	7.94702	9.17086	207.55	284.215	206.586	725.774	702.019	601.438	7.92937	7.8723	8.03939	9.2054	9.34435	8.96282
ASHGA5P003655	0.0276465	0.084432	2.53165	down	protein_coding	NM_004162	CCDS2633.1	RAB5A	RefSeq	2548	chr3	+	19988571	20026667		ACCATTGGGGCTGCTTTTCTAACCCAAACTGTATGTCTTGATGACACTACAGTAAAGTTT	5868	Hs.475663	GO:0001726|GO:0003924|GO:0005515|GO:0005525|GO:0005769|GO:0005886|GO:0006897|GO:0007264|GO:0007399|GO:0007596|GO:0010008|GO:0015031|GO:0015629|GO:0019003|GO:0030139|GO:0030154|GO:0031901|GO:0042470|GO:0045121|GO:0045921|GO:0051489|GO:2000286	ras-related protein Rab-5A	138.32	435.24	7.12126	8.46134	71.0876	236.512	107.361	588.039	386.093	331.588	6.54806	7.62154	7.19417	8.89185	8.44351	8.04865
ASHGA5P003170	0.00276118	0.0208103	2.43895	down	protein_coding	NM_030627	CCDS4390.1	CPEB4	RefSeq	7769	chr5	+	173315330	173387313		TCATATCCAGGATCCGATAGCTCTCTGCTTATTAATGCAAGGACATATGGGCGAAGGAGA	80315	Hs.127126	GO:0000166|GO:0003723	cytoplasmic polyadenylation element-binding protein 4	5.35232	21.7009	2.62471	3.91097	5	6.05697	5	26.6946	17.8512	20.5569	2.46913	2.90907	2.49594	4.16997	3.72236	3.84058
ASHGA5P012164	0.0486076	0.12361	2.58884	down	protein_coding	NM_001012752	CCDS31169.1	ABI1	RefSeq	3629	chr10	-	27035524	27150016	NM_001178121, NM_001178124	ACCTATCGATTACACAGTTCTGGATGATGTGGGCCATGGTGTCAAGCATGGAAATAACCA	10006	Hs.508148	GO:0001756|GO:0005515|GO:0005622|GO:0005634|GO:0005783|GO:0005829|GO:0005856|GO:0006928|GO:0007169|GO:0008092|GO:0008154|GO:0008285|GO:0018108|GO:0030027|GO:0030054|GO:0030175|GO:0030296|GO:0030426|GO:0045202	abl interactor 1 isoform d	85.7894	284.779	6.45336	7.82566	34.2915	145.091	77.9854	372.889	200.23	281.217	5.58169	6.99096	6.78742	8.20763	7.46474	7.80462
ASHGA5P011207	0.0186634	0.0650955	2.25792	down	protein_coding	NM_007269	CCDS790.1	STXBP3	RefSeq	2522	chr1	+	109289284	109352148		TATAGAAAAGCTCTGCAAAACTGAACAGGACCTGGCACTTGGAACTGATGCAGAAGGACA	6814	Hs.530436	GO:0005515|GO:0005634|GO:0005730|GO:0005737|GO:0005829|GO:0005829|GO:0005886|GO:0006904|GO:0007596|GO:0015031|GO:0016323|GO:0016324|GO:0017075|GO:0019905|GO:0030168|GO:0031091|GO:0042581|GO:0043312|GO:0045955|GO:0070527|GO:0070820	syntaxin-binding protein 3	2135.42	5410.08	10.9831	12.1581	1389.91	3094.06	1922.3	6596.42	5717.95	3915.87	10.5577	11.253	11.1387	12.4364	12.3117	11.7263
ASHGA5P003435	5.83234e-05	0.00325267	2.16618	down	protein_coding	NM_003366	CCDS10601.1	UQCRC2	RefSeq	1674	chr16	+	21964608	21994668		TTCCAACACAGATGTCCAAGCTGCCAAGAACAAGCTGAAAGCTGGATACCTAATGTCAGT	7385	Hs.528803	GO:0004222|GO:0005515|GO:0005739|GO:0005743|GO:0005750|GO:0006119|GO:0006508|GO:0009060|GO:0022904|GO:0032403|GO:0044281|GO:0046872	cytochrome b-c1 complex subunit 2, mitochondrial precursor	22038	57061.1	14.474	15.5892	22963.3	24552.2	18598.5	61218.3	57656.7	52308.4	14.5523	14.4487	14.421	15.6794	15.5735	15.5147
ASHGA5P011411	0.0305471	0.0903782	2.56818	down	protein_coding	NM_006252	CCDS605.1	PRKAA2	RefSeq	9369	chr1	+	57110989	57181008		TCTCAGGCAGATTGTATGCAGGTCCTGAAGTTGATATCTGGAGCTGTGGTGTTATCTTGT	5563	Hs.437039	GO:0003682|GO:0004672|GO:0004674|GO:0004679|GO:0005515|GO:0005524|GO:0005654|GO:0005829|GO:0006112|GO:0006351|GO:0006355|GO:0006468|GO:0006633|GO:0006695|GO:0006853|GO:0006914|GO:0006950|GO:0007050|GO:0007165|GO:0008286|GO:0008610|GO:0010508|GO:0014823|GO:0016055|GO:0016324|GO:0030674|GO:0031000|GO:0031588|GO:0031669|GO:0032007|GO:0035174|GO:0042149|GO:0042304|GO:0042593|GO:0042752|GO:0043066|GO:…	5'-AMP-activated protein kinase catalytic subunit alpha-2	6.15504	29.7993	3.01227	4.37302	5	7.40452	6.06061	36.695	33.0553	19.6477	2.46913	3.1376	3.43008	4.66589	4.68471	3.76846
ASHGA5P049661	0.000652336	0.00968864	4.2154	down	protein_coding	ENST00000436615	CCDS11363.1	RAPGEFL1	GENCODE	3727	chr17	+	38334241	38351906		TTCGAGCTCTCCTACAAGCTGGAGGCAAACAGTCAGTGAGAGTGGAGGCTCCAGTCAGAC	51195	Hs.632254	GO:0007264|GO:0007186|GO:0007399|GO:0005622|GO:0005624|GO:0005085|GO:0005057	Rap guanine nucleotide exchange factor (GEF)-like 1 [Source:HGNC Symbol;Acc:17428]	10.8464	85.7948	3.94398	6.01965	11.6962	12.2743	8.56874	107.507	82.0972	67.7799	4.15375	3.81021	3.86799	6.29916	6.0971	5.66268
ASHGA5P055677	0.0318953	0.0931932	2.16581	down	protein_coding	NM_032554	CCDS9236.1	HCAR1	RefSeq	2977	chr12	-	123212152	123215129		GTTGATTGAAGTGAGTTGGCTGCATTTTCTTATCTGATCACAATGGCAGGGGACAGAATG	27198	Hs.610873	GO:0004930|GO:0005886|GO:0016021|GO:0032355	hydroxycarboxylic acid receptor 1	5.83773	25.628	3.07202	4.18692	6.13575	5	6.37744	26.9673	25.8368	24.08	3.31719	2.40305	3.49581	4.18613	4.30236	4.07228
ASHGA5P011256	0.00119534	0.0130888	2.57017	down	protein_coding	NM_001006605	CCDS44173.1	FAM69A	RefSeq	2603	chr1	-	93307716	93427079	NM_001252270, NM_001252273	TTACCTCCAGGCTCGCTTCTCATATGTGCGGATGAAATATCTTTTCTTTTCCTGGTTAGT	388650	Hs.180946	GO:0005789|GO:0016021	protein FAM69A isoform 1	20.3515	87.6844	4.72044	6.0823	15.7833	30.1871	15.0841	84.0288	91.3576	87.6668	4.55903	4.99107	4.61124	5.93667	6.25943	6.05081
ASHGA5P009941	0.045342	0.11767	2.55149	down	protein_coding	NM_172351	CCDS31008.1	CD46	RefSeq	3357	chr1	+	207925382	207968861	NM_002389, NM_172352	AGAAGAAAGGCACATACCTAACTGATGAGACCCACAGAGAAGTAAAATTTACTTCTCTCT	4179	Hs.510402	GO:0001848|GO:0002079|GO:0004175|GO:0004857|GO:0004872|GO:0005794|GO:0005886|GO:0005887|GO:0006508|GO:0006958|GO:0007338|GO:0009986|GO:0016323|GO:0019048|GO:0030449|GO:0045087|GO:0045916	membrane cofactor protein isoform 3 precursor	1637.76	4409.29	10.4825	11.8339	822.878	2844.82	1245.59	5744.05	4513.08	2970.72	9.7875	11.1274	10.5327	12.2071	11.9768	11.3177
ASHGA5P038516	0.0240163	0.0767854	2.69623	down	protein_coding	ENST00000389740	CCDS43162.1	GPR149	GENCODE	2323	chr3	-	154055460	154147504		TCTAGCAACTTGAAGGCGACTCTCCTAGTCTCTTACAACTTTTATACGATGCACAGAGGT	344758	Hs.688231	GO:0007186|GO:0001547|GO:0060206|GO:0001546|GO:0060280|GO:0016021|GO:0005886|GO:0004930	G protein-coupled receptor 149 [Source:HGNC Symbol;Acc:23627]	6.93862	27.708	2.8707	4.30164	5	10.8159	5	32.9822	25.3447	24.7971	2.46913	3.64703	2.49594	4.50794	4.27664	4.12035
ASHGA5P047915	0.0399595	0.108076	2.87493	down	protein_coding	NM_001123395	CCDS44125.1	CLDN19	RefSeq	3602	chr1	-	43198763	43205925	ENST00000296387	TCTCGTGGTATGCCACCCTGGTGACCCAGGAGTTCTTCAACCCAAGCACACCTGTCAATG	149461	Hs.496270	GO:0005198|GO:0005634|GO:0005737|GO:0005923|GO:0005923|GO:0007601|GO:0016021|GO:0016323|GO:0016338|GO:0019227|GO:0042802|GO:0043296|GO:0043297|GO:0050896	claudin-19 isoform b	9.27137	41.5767	3.40209	4.92562	5	16.0103	6.80377	41.9494	34.8442	47.9365	2.46913	4.15986	3.57729	4.87154	4.76804	5.13728
ASHGA5P036051	0.000155014	0.00505209	3.31613	down	protein_coding	ENST00000329106	CCDS33267.1	SULT1C3	GENCODE	915	chr2	+	108863650	108881807		TGTAATGAAGCAAAACCCAATGACCAACTATACCACTTTGCCCACCAGCATTATGGACCA	442038	Hs.535156	GO:0006790|GO:0005737|GO:0008146|GO:0004062|GO:0004027	sulfotransferase family, cytosolic, 1C, member 3 [Source:HGNC Symbol;Acc:33543]	16.4584	95.7497	4.48036	6.20986	13.9908	21.6619	13.7224	91.5868	103.319	92.3436	4.39691	4.5484	4.49576	6.06385	6.43936	6.12636
ASHGA5P012444	0.00011066	0.00433719	2.17025	down	protein_coding	NM_001042478	CCDS54.1	AJAP1	RefSeq	2070	chr1	+	4715104	4837854	NM_018836	TCATCACAACTCTTGTCTTAAAAAATTGCTGTGCCCAAAGCGGGAACACTCGTCGGAACA	55966	Hs.25924	GO:0005912|GO:0007155|GO:0016021|GO:0016323|GO:0016324	adherens junction-associated protein 1 precursor	5	17.3744	2.45604	3.5739	5	5	5	19.8387	15.1082	17.1764	2.46913	2.40305	2.49594	3.69894	3.4632	3.55957
ASHGA5P052284	0.0194859	0.0669566	2.16567	down	protein_coding	NM_021967	CCDS47228.1	SERF1A	RefSeq	1935	chr5	+	70196489	70214357		TCTTTTTATGAGGACTTTTGCTGTTGGATTTAGGTTCCATTCTAACCTAGGATGATCTCA	8293	Hs.726820		small EDRK-rich factor 1 isoform 1	6.13359	20.9674	2.75695	3.87176	5	8.40077	5	23.1595	21.4398	18.3029	2.46913	3.30577	2.49594	3.947	4.01026	3.65802
ASHGA5P037274	0.000407596	0.00776734	3.10628	down	protein_coding	NM_175858	CCDS13608.1	KRTAP11-1	RefSeq	928	chr21	-	32252963	32253874		ACAAAAACAGAGCTTGTCTCACCATGTATTTCTCAATAAACCTGCATTAGTTGGCATTGC	337880	Hs.407654	GO:0005198|GO:0045095	keratin-associated protein 11-1	5	24.1565	2.45604	4.09123	5	5	5	24.6948	26.9663	20.8083	2.46913	2.40305	2.49594	4.04711	4.36674	3.85985
ASHGA5P036264	0.00208507	0.0176561	2.11671	down	protein_coding	NM_002148	CCDS2266.1	HOXD10	RefSeq	1814	chr2	+	176981491	176984670		TGGATATTTTAGACTGAGTCAGACCTACGCCACCGGGAAAACCCAAGAGTACAATAATAG	3236	Hs.123070	GO:0003682|GO:0003700|GO:0005634|GO:0006351|GO:0007519|GO:0008344|GO:0009952|GO:0009954|GO:0021520|GO:0030326|GO:0035136|GO:0035137|GO:0043565|GO:0045944|GO:0048704|GO:0048935|GO:0050905	homeobox protein Hox-D10	5	16.9819	2.45604	3.53787	5	5	5	15.1293	15.6667	20.1496	2.46913	2.40305	2.49594	3.28777	3.51949	3.80634
ASHGA5P010267	0.0259053	0.0808818	2.22941	down	protein_coding	NM_207409	CCDS4810.2	CLPSL2	RefSeq	422	chr6	+	35744391	35747329		ATATAAAAAGAAAATCACAGACAGGTGCTTCCACCACTCTGAGTGCTACAGTGGCTGCTG	389383	Hs.259563	GO:0005576|GO:0007586|GO:0008047|GO:0016042	colipase-like protein 2 precursor	6.20342	25.2925	2.99498	4.15164	7.47781	6.13244	5	30.5789	20.9098	24.3889	3.56527	2.92372	2.49594	4.38975	3.97106	4.09412
ASHGA5P030809	0.00341921	0.0233101	2.31103	down	protein_coding	NM_000693	CCDS10389.1	ALDH1A3	RefSeq	3510	chr15	+	101420008	101456830		AACTGCTACAACGCCCTCTATGCACAGGCTCCATTTGGTGGCTTTAAAATGTCAGGAAAT	220	Hs.459538	GO:0001822|GO:0002072|GO:0002138|GO:0004029|GO:0004030|GO:0005737|GO:0021768|GO:0021983|GO:0042493|GO:0042572|GO:0042573|GO:0042574|GO:0042803|GO:0043065|GO:0048048|GO:0060166|GO:0060324|GO:0070324|GO:0070403	aldehyde dehydrogenase family 1 member A3	25.5648	96.3105	5.0062	6.21474	24.4577	36.8528	15.384	102.652	83.623	102.656	5.13953	5.24504	4.63402	6.23153	6.12448	6.2882
ASHGA5P043118	0.00569921	0.0309193	2.16196	down	protein_coding	NM_001145440		TYW1B	RefSeq	3171	chr7	-	72039491	72298813	NM_001145441, NM_018264	TCTGGGCTTTGCTGTTAGCATTAGCCTTTGGATTTGTGTCCAGATTGTCATCGAGATGCA	441250	Hs.488614	GO:0005506|GO:0008033|GO:0010181|GO:0016491|GO:0051539	tRNA wybutosine-synthesizing protein 1 homolog B isoform 1	5.22151	19.0331	2.59768	3.71002	5	5.66454	5	22.2478	19.6806	15.1708	2.46913	2.82796	2.49594	3.88511	3.87631	3.36863
ASHGA5P002570	0.0104872	0.0449304	2.57464	down	protein_coding	NM_020841	CCDS31862.1	OSBPL8	RefSeq	7259	chr12	-	76745577	76953589		GATAGCAAAGATGTCCTTGGGCCATCAACTGTTGTAGCAAACAGTGACGAATCTCAGCTT	114882	Hs.430849	GO:0005543|GO:0006869	oxysterol-binding protein-related protein 8 isoform a	6.33468	28.8407	2.9934	4.35777	5.02458	8.97946	5	34.7987	27.1552	24.5681	3.08074	3.40352	2.49594	4.59103	4.37657	4.10572
ASHGA5P029521	0.00372145	0.0243036	2.27109	down	protein_coding	NM_054024	CCDS9672.1	MIA2	RefSeq	2351	chr14	+	39703124	39722575		GGAAAATACCCTGCTAAATAGTCAGATGGTTTCAACTGATAACTCTTTGTCTTCTCAAAA	117153	Hs.287694	GO:0005576	melanoma inhibitory activity protein 2 precursor	5	18.3758	2.45604	3.63943	5	5	5	21.0139	13.1783	20.9351	2.46913	2.40305	2.49594	3.79374	3.25586	3.86869
ASHGA5P000752	0.00419722	0.0258336	2.25731	down	protein_coding	ENST00000170564	CCDS12428.1	GPATCH1	GENCODE	3362	chr19	+	33571785	33621318		AATAAAGGAAGAAAATTGGGAATTTCAGGCCAGGCTTTTGGTGTAGGTGCCCTGGAAGAG	55094	Hs.466436	GO:0000398|GO:0071013|GO:0003676	G patch domain containing 1 [Source:HGNC Symbol;Acc:24658]	13.1207	54.0286	4.16412	5.33873	15.3387	15.5746	8.4488	58.1078	52.7156	51.2624	4.51909	4.12229	3.85098	5.36802	5.40427	5.24389
ASHGA5P039438	0.0317603	0.0928742	3.08872	down	protein_coding	NM_001077	CCDS3523.1	UGT2B17	RefSeq	2099	chr4	-	69402902	69434245		CCCCACACAAAAGTTACTGAGCTTCCTTATGTTTCACACATTGTATTTGAACACAAAACA	7367	Hs.575083	GO:0001972|GO:0005789|GO:0008202|GO:0015020|GO:0016020|GO:0016021	UDP-glucuronosyltransferase 2B17 precursor	9.86675	46.874	3.497	5.12401	10.236	14.3643	5	50.645	45.3231	44.6538	3.98127	4.01378	2.49594	5.16264	5.17458	5.0348
ASHGA5P021603	0.0367095	0.102277	2.00231	down	protein_coding	NM_001162435		LOC100287718	RefSeq	1073	chr6	+	46714653	46726954		AAATTTCACACAAGACAGGCTGTTCTCACATTTCAATGCACTCACCTGGAGGGCTTACCA	100287718	Hs.736491		hypothetical protein LOC100287718	5.68356	18.8796	2.68162	3.68328	5	7.05067	5	19.1411	23.3958	14.1018	2.46913	3.07978	2.49594	3.64447	4.1452	3.26018
ASHGA5P013138	0.000756633	0.0104948	2.13239	down	protein_coding	ENST00000389156	CCDS43330.1	FAM169A	GENCODE	5990	chr5	-	74073398	74162663		CCATTGGGTTTTATTCAGTTAAGCCTACAGGAAGCATATGTGCCTCTTTTCTTACCCAAA	26049	Hs.91662		family with sequence similarity 169, member A [Source:HGNC Symbol;Acc:29138]	12.5478	50.0953	4.13237	5.22485	10.1449	15.6847	11.8137	51.6822	51.2569	47.3468	3.97039	4.13251	4.29422	5.1945	5.36192	5.11813
ASHGA5P008994	0.0385896	0.105627	2.0463	down	protein_coding	NM_003070	CCDS34977.1	SMARCA2	RefSeq	5758	chr9	+	2015341	2193623		AAGGAAACAGTTCAGGGCGACAGCTCAGTGAAGTCTTCATTCAGTTACCTTCAAGGAAAG	6595	Hs.298990	GO:0000122|GO:0000790|GO:0001105|GO:0003713|GO:0004386|GO:0005515|GO:0005524|GO:0005634|GO:0005654|GO:0005730|GO:0006338|GO:0006355|GO:0006357|GO:0007399|GO:0008094|GO:0008285|GO:0016514|GO:0030308|GO:0035887|GO:0043231|GO:0044212|GO:0045111|GO:0045892|GO:0045893|GO:0045893|GO:0045944|GO:0071564|GO:0071565|GO:0071778	probable global transcription activator SNF2L2 isoform a	308.598	689.148	8.16354	9.19656	274.946	513.911	136.936	729.391	604.784	733.27	8.31621	8.65844	7.51598	9.21204	9.12901	9.24865
ASHGA5P002557	0.0090338	0.0410213	2.60953	down	protein_coding	NM_004792	CCDS2235.1	PPIG	RefSeq	2717	chr2	+	170440849	170494254		GCAAGAAGAGTGCATCTAGTGAGAGTGAAGCTGAAAATCTTGAAGCACAACCCCAGTCTA	9360	Hs.727580	GO:0003755|GO:0005634|GO:0005654|GO:0005730|GO:0005737|GO:0006457|GO:0008380|GO:0016018|GO:0016363|GO:0016607	peptidyl-prolyl cis-trans isomerase G	250.003	765.869	7.96389	9.34768	142.749	379.389	227.871	874.24	786.905	636.462	7.46521	8.26046	8.166	9.4865	9.50726	9.04929
ASHGA5P004787	0.0490485	0.124362	2.34169	down	protein_coding	NM_022900	CCDS5636.1	CASD1	RefSeq	3898	chr7	+	94139169	94186328		TTCTTTCTTGACCTATTCCATCTGGGCTAGCAGTTGTAAAAACAAAGCAGAGTGCAATGA	64921	Hs.260041	GO:0016021	CAS1 domain-containing protein 1 precursor	700.329	1886.95	9.35087	10.5784	406.188	1038.91	655.89	2484	2041.16	1135.7	8.8276	9.63756	9.58745	11.0016	10.855	9.87869
ASHGA5P007194	0.000454724	0.00818882	3.13416	down	protein_coding	ENST00000329285	CCDS32991.1	ZNF599	GENCODE	3115	chr19	-	35248978	35264134		ACCTGCGCAGGTGAAAAAGCAAAACCCAAGATTACAGAGCCTACTGCTTCTCAGCTGGCC	148103	Hs.590961	GO:0006351|GO:0006355|GO:0005634|GO:0005622|GO:0003677|GO:0008270|GO:0003676	zinc finger protein 599 [Source:HGNC Symbol;Acc:26408]	5.37286	27.1684	2.62863	4.27671	5	6.11859	5	30.0536	23.8066	27.6451	2.46913	2.92082	2.49594	4.36251	4.17618	4.29143
ASHGA5P044652	0.000409324	0.00777334	2.56454	down	protein_coding	NM_198464	CCDS5976.1	PRSS55	RefSeq	1129	chr8	+	10383055	10396333		CTGTCCCATGTGTTGTTCAGAGCTATTTTGTACTGATAATAAAATAGAGGCTATTCTTTC	203074	Hs.591394	GO:0004252|GO:0006508|GO:0016021	serine protease 55 isoform 1 precursor	11.993	57.2432	4.0638	5.4225	9.38019	15.1791	11.4195	64.0228	53.7566	53.9501	3.86098	4.08538	4.24504	5.516	5.43278	5.31872
ASHGA5P010940	0.001977	0.017096	2.68309	down	protein_coding	NM_001193302	CCDS53378.1	SEMA4A	RefSeq	2999	chr1	+	156123368	156147542		ATGTGCCTTTAAGAAGAAGAGCAATGAGGAACTTCAAGATTCCTACCTGTTGCCCATCTC	64218	Hs.408846	GO:0001525|GO:0004872|GO:0005886|GO:0007411|GO:0008360|GO:0010594|GO:0016021|GO:0016525|GO:0045063|GO:0071526	semaphorin-4A isoform 2	10.7962	55.4387	3.9452	5.3691	11.2936	12.0621	9.03286	58.0667	62.5848	45.6645	4.11202	3.78867	3.93492	5.36698	5.67225	5.06806
ASHGA5P003499	0.000180972	0.00533535	3.22958	down	protein_coding	NM_032265	CCDS11053.1	ZMYND15	RefSeq	2307	chr17	+	4643309	4649414		GGTGTTTTTGTCCCTGAGCTCAACATCCAAAACAAACAGTCACTGAAGATCCACGTGGTG	84225	Hs.47223	GO:0005634|GO:0005737|GO:0006351|GO:0007286|GO:0008270|GO:0042826|GO:0045892	zinc finger MYND domain-containing protein 15 isoform 2	5	25.0147	2.45604	4.14739	5	5	5	22.6796	26.3453	26.0193	2.46913	2.40305	2.49594	3.91346	4.33278	4.19592
ASHGA5P015690	0.00189923	0.0167043	2.26698	down	protein_coding	NM_001135823	CCDS44850.1	SSPN	RefSeq	4364	chr12	+	26348268	26387708		TTTGGAGGCTCGGTCTGCTTAGTGGCCTATCTTGGCTTGTTTATGCTTTGTGTCTCATAT	8082	Hs.183428	GO:0005887|GO:0006936|GO:0007155|GO:0016010|GO:0030054|GO:0030133|GO:0042383|GO:0045211	sarcospan isoform 2	27.4165	106.635	5.18568	6.36645	23.7324	29.4412	29.0758	112.439	98.3467	109.119	5.10092	4.95662	5.4995	6.36466	6.36348	6.37123
ASHGA5P012095	0.00696029	0.034805	2.37875	down	protein_coding	NM_172165	CCDS34410.1	MSH5	RefSeq	2790	chr6	+	31707724	31730455	NM_002441, NM_025259, NR_037846	TTGACTGCCTCCTCACAGTTCGAGCACTTGGAGGGCTGCTGAAGTTCCTGGGTCGAAGAA	4439	Hs.647011	GO:0000710|GO:0000795|GO:0003684|GO:0005524|GO:0006298|GO:0007126|GO:0007131|GO:0007136|GO:0008094|GO:0030983|GO:0032300|GO:0045143|GO:0051026	mutS protein homolog 5 isoform b	114.422	381.895	7.03974	8.28994	120.252	124.147	98.8683	435.774	413.67	296.241	7.24139	6.78616	7.09165	8.43972	8.54565	7.88445
ASHGA5P032892	0.00189914	0.0167043	2.99568	down	protein_coding	NM_001130092	CCDS45623.1	LRRC48	RefSeq	2068	chr17	+	17876126	17911142	NM_001130091	CGTTTCCAAAAGTTCAATTATGTGGAGGCTTCTGGCACTTTCTAAGAGAAGCAGTTACAG	83450	Hs.579264	GO:0005737	leucine-rich repeat-containing protein 48 isoform b	5	23.8982	2.45604	4.03892	5	5	5	28.5103	16.6048	26.5795	2.46913	2.40305	2.49594	4.2775	3.60796	4.23131
ASHGA5P030533	7.83616e-05	0.0037799	3.03738	down	protein_coding	ENST00000314902	CCDS30896.1	OR10K2	GENCODE	939	chr1	-	158389717	158390656		AGCCAGGATGCTCTAATATCAGTATCCTACACTATTATAACTCCATTGTTCAACCCAATG	391107	Hs.626815	GO:0007186|GO:0016021|GO:0005886|GO:0004930|GO:0004984	olfactory receptor, family 10, subfamily K, member 2 [Source:HGNC Symbol;Acc:14826]	5	23.7219	2.45604	4.05887	5	5	5	24.9069	19.9124	26.3464	2.46913	2.40305	2.49594	4.06486	3.895	4.21675
ASHGA5P055840	0.0147893	0.0558931	2.5714	down	protein_coding	NM_175929	CCDS9500.1	FGF14	RefSeq	2831	chr13	-	102373204	103054124		TCTTTCTCAGGGTGTCTAAGCTGCTGGATTGCTTTTCGCCCAAATCAATGTGGTTTCTTT	2259	Hs.508616	GO:0005104|GO:0005634|GO:0007165|GO:0007254|GO:0007267|GO:0007399|GO:0008083|GO:0008201|GO:0008219|GO:0008543	fibroblast growth factor 14 isoform 1B	11.7563	51.5913	3.90107	5.26363	6.34137	20.2979	8.62965	50.1433	45.9761	58.6545	3.3606	4.46496	3.87766	5.14861	5.19766	5.44461
ASHGA5P027740	0.0169584	0.0609666	4.44887	down	protein_coding	NM_001167623	CCDS53734.1	CACNA1C	RefSeq	13480	chr12	+	2162415	2807115	NM_001129840, NM_001167624, NM_001167625	TCAGTCTGGTCATCTTTGGATCCTTTTTCGTTCTAAATCTGGTTCTCGGTGTGTTGAGCG	775	Hs.118262	GO:0005245|GO:0005515|GO:0005516|GO:0005737|GO:0005886|GO:0005886|GO:0005891|GO:0006112|GO:0007204|GO:0007411|GO:0014069|GO:0016021|GO:0019904|GO:0030018|GO:0030315|GO:0043025|GO:0044281|GO:0050796|GO:0051393|GO:0051721|GO:0060402	voltage-dependent L-type calcium channel subunit alpha-1C isoform 21	8.44031	48.507	3.02144	5.17488	5	15.3209	5	47.5735	51.025	46.9224	2.46913	4.09925	2.49594	5.06421	5.35476	5.10567
ASHGA5P004045	0.000688363	0.00998358	2.72583	down	protein_coding	NM_001871	CCDS33874.1	CPB1	RefSeq	1473	chr3	+	148545587	148577972		TTTGATGCTGGTTGGTGTGAAATTGGAGCCTCTCGAAACCCCTGTGATGAAACTTACTGT	1360	Hs.477891	GO:0004180|GO:0004181|GO:0005576|GO:0006508|GO:0008270	carboxypeptidase B preproprotein	17.094	83.0441	4.54567	5.99237	13.6937	19.7026	17.8856	89.7947	73.5954	85.7422	4.36656	4.42942	4.84101	6.03794	5.92753	6.01163
ASHGA5P046252	0.018024	0.0636001	2.02813	down	protein_coding	ENST00000373034	CCDS55462.1	PCDH19	GENCODE	9756	chrX	-	99546641	99665271		ATTGCATCTCGGTTTCTCCCATTAGCGAGGAGCAAGACAAAAAGACAGAGGAGAAAGTGA	57526	Hs.4993	GO:0007156|GO:0016021|GO:0005886|GO:0016020|GO:0005509	protocadherin 19 [Source:HGNC Symbol;Acc:14270]	22.9884	77.6383	4.85825	5.8784	24.4353	32.0612	12.4688	91.7699	65.8186	75.3264	5.1386	5.06696	4.3692	6.0676	5.74963	5.81798
ASHGA5P006987	0.0202256	0.0685074	2.01933	down	protein_coding	NM_001112808	CCDS44161.1	FPGT-TNNI3K	RefSeq	3328	chr1	+	74663895	75010116	NM_015978	AGTTAGAAGAGTGTCTCTGCAACATTGAGCTGATGTCTCCTGCATCAAGTAACAGCAGTG	100526835			FPGT-TNNI3K fusion protein isoform a	13.8805	50.899	4.23503	5.2489	18.55	13.958	9.13356	53.1244	46.8214	52.7513	4.77631	3.98047	3.94831	5.23361	5.22493	5.28817
ASHGA5P006588	0.034986	0.0990629	2.15183	down	protein_coding	NM_030790	CCDS10728.1	ITFG1	RefSeq	2261	chr16	-	47189297	47495015		ACGGATCTCTTCGTGCTGCGGGAAAGAAATGACTTAATCGTCTTTTTGGCAGACCAGAAT	81533	Hs.42217	GO:0005576|GO:0016021	T-cell immunomodulatory protein precursor	690.469	1636.23	9.30234	10.4079	400.562	1128.92	541.925	2056.3	1636.87	1215.51	8.8111	9.76553	9.33039	10.7041	10.5404	9.97917
ASHGA5P010259	0.00014092	0.00484919	2.10896	down	protein_coding	NM_020365	CCDS517.1	EIF2B3	RefSeq	2027	chr1	-	45316193	45452394		ATCAAGGACTGCTTGATTGGAAGTGGCCAGAGGATTGAAGCCAAAGCTAAACGAGTGAAT	8891	Hs.533549	GO:0003743|GO:0005085|GO:0005085|GO:0005515|GO:0005737|GO:0005829|GO:0005851|GO:0006412|GO:0006413|GO:0006413|GO:0008135|GO:0009408|GO:0009408|GO:0009749|GO:0010467|GO:0014003|GO:0016779|GO:0032057|GO:0043434|GO:0044267|GO:0051716	translation initiation factor eIF-2B subunit gamma isoform 1	3690.42	8657.4	11.8096	12.8862	3523.98	4481.1	3066.16	8483.7	8155.29	9333.21	11.8293	11.818	11.7817	12.7898	12.8367	13.032
ASHGA5P039784	0.00614347	0.0323117	2.11615	down	protein_coding	NM_000683	CCDS47004.1	ADRA2C	RefSeq	1958	chr4	+	3768295	3770253		ATTTCCGGCGATCCTTTAAGCACATCCTCTTCCGACGGAGGAGAAGGGGCTTCAGGCAGT	152	Hs.123022	GO:0004938|GO:0005515|GO:0005737|GO:0005768|GO:0005886|GO:0005887|GO:0006112|GO:0007186|GO:0007267|GO:0007596|GO:0010700|GO:0010700|GO:0030168|GO:0030424|GO:0031694|GO:0032148|GO:0032811|GO:0035625|GO:0042803|GO:0044281|GO:0045666|GO:0046982|GO:0050796|GO:0051379|GO:0071883	alpha-2C adrenergic receptor	5	16.9882	2.45604	3.53748	5	5	5	14.0863	19.648	17.2305	2.46913	2.40305	2.49594	3.17344	3.874	3.56501
ASHGA5P050038	0.000289585	0.00660441	2.59836	down	protein_coding	NM_004368	CCDS12053.1	CNN2	RefSeq	2478	chr19	+	1026297	1039064	NM_201277	GCGGCCCCGTCCCGCCGCCCGCCCGCCAGCCATGAGCTCCACGCAGTTCAACAAGGGCCC	1265	Hs.651512	GO:0001725|GO:0003779|GO:0005516|GO:0005856|GO:0005911|GO:0007010|GO:0031032|GO:0032970|GO:0071260	calponin-2 isoform a	3458.33	9985.2	11.7148	13.0924	3447.76	4147.65	2779.58	10127.3	8797.49	11030.8	11.8015	11.7014	11.6415	13.0575	12.9281	13.2916
ASHGA5P012240	0.0233671	0.0753142	2.21807	down	protein_coding	ENST00000376650	CCDS33103.1	DPRX	GENCODE	648	chr19	+	54135309	54140263		AGTACTGCAGGTCTGGTTCAAGAATCACAGAGCAAAACTCAAGAAAGCGAAATGCAAGCA	503834	Hs.579941	GO:0006351|GO:0006355|GO:0005634|GO:0003677|GO:0003700|GO:0043565	divergent-paired related homeobox [Source:HGNC Symbol;Acc:32166]	6.6098	30.8802	3.30774	4.45704	5.97908	5.70102	8.1493	38.1937	28.6942	25.7527	3.28507	2.83438	3.80377	4.72994	4.46089	4.1803
ASHGA5P005879	0.00751608	0.0364397	2.27672	down	protein_coding	NM_016050	CCDS8139.1	MRPL11	RefSeq	1610	chr11	-	66202549	66206310	NM_170738	TGGTGAAGGACCTCAGTTCAGAAGAGCTTGCAGCTTTCCAGAAGGAACGAGCCATCTTCC	65003	Hs.418450	GO:0003735|GO:0005515|GO:0005761|GO:0006412	39S ribosomal protein L11, mitochondrial isoform a	4122.98	10465.1	11.9537	13.1406	3699.95	5486.1	3182.88	9753.07	8227.82	13414.5	11.9136	12.1082	11.8393	12.9995	12.8436	13.5789
ASHGA5P014721	0.0379154	0.104349	2.86001	down	protein_coding	NM_014931	CCDS46186.1	PPP6R1	RefSeq	3654	chr19	-	55741146	55770038		CCCCTCGCAGGGCGCCATGTTTTGGAAGTTTGACCTGCACACAAGCTCGCACCTGGACAC	22870	Hs.515610	GO:0005515|GO:0005634|GO:0005730|GO:0005737|GO:0019903|GO:0043666	serine/threonine-protein phosphatase 6 regulatory subunit 1	8.82068	39.5034	3.32805	4.84407	5	15.5912	5.87087	38.6202	32.974	46.9158	2.46913	4.12366	3.39136	4.74686	4.67995	5.1054
ASHGA5P026460	0.0140332	0.0540953	2.1122	down	protein_coding	NM_016464	CCDS8005.1	TMEM138	RefSeq	1868	chr11	+	61129472	61136975		CGAGAAAACAGAAGGAAGATGCTCCAGACCAGTAACTACAGCCTGGTGCTCTCTCTGCAG	51524	Hs.406530	GO:0005774|GO:0005929|GO:0016021|GO:0042384	transmembrane protein 138	258.9	646.35	7.99714	9.07588	172.246	417.887	186.568	692.66	482.449	763.941	7.69538	8.38613	7.90989	9.13778	8.77491	9.31496
ASHGA5P046727	0.000342073	0.00711473	2.97936	down	protein_coding	NM_001048181	CCDS35447.1	OPN1MW2	RefSeq	1283	chrX	+	153485202	153498755	NM_020061	TTCTTTGCCAAAAGTGCCACTATCTACAACCCCGTTATCTATGTCTTTATGAACCGGCAG	728458	Hs.571751	GO:0004930|GO:0005886|GO:0005886|GO:0005887|GO:0007186|GO:0007601|GO:0007602|GO:0009881|GO:0018298	medium-wave-sensitive opsin 1	9.92467	56.477	3.83076	5.40577	10.9353	11.0492	7.78946	59.8747	56.9693	52.5869	4.06801	3.67365	3.75062	5.41364	5.5197	5.28395
ASHGA5P007479	0.0487519	0.123828	2.04991	down	protein_coding	NM_001220473		PPFIA2	RefSeq	5424	chr12	-	81652044	82152474	NM_001220474, NM_001220475, NM_003625, NR_038265	CTGGGCCCAGTGTCCGGTTTTTCTACAGACCCTGGCTTATGGAGATATGAATCATGAGTG	8499	Hs.506216	GO:0005515|GO:0005737|GO:0007160|GO:0009986	liprin-alpha-2 isoform b	10.6374	39.0594	3.80062	4.83617	5.14588	16.7315	10.0349	44.0981	39.7962	33.2839	3.11108	4.21728	4.07349	4.95038	4.97516	4.58298
ASHGA5P054342	0.000169083	0.00524717	2.1419	down	protein_coding	NM_012341	CCDS31132.1	GTPBP4	RefSeq	2537	chr10	+	1034348	1063708		ACTTGCTGTCTGGGAAGAGGAAAGCTGGTAAAAAGGACAGGAGATAGTATCCGTTTGGTT	23560	Hs.215766	GO:0000079|GO:0003924|GO:0005515|GO:0005525|GO:0005634|GO:0005730|GO:0005737|GO:0005794|GO:0006184|GO:0008156|GO:0008285|GO:0022408|GO:0030336|GO:0031397|GO:0031965|GO:0033342|GO:0042254|GO:0048471|GO:0050821	nucleolar GTP-binding protein 1	4293.55	10216.1	12.0231	13.122	3917.26	5641.26	3322.13	10191.5	10434	10023	11.9961	12.1639	11.9094	13.0667	13.1729	13.1264
ASHGA5P034499	0.00074016	0.010346	2.29269	down	protein_coding	ENST00000248072	CCDS12320.1	OR7C2	GENCODE	960	chr19	+	15052300	15053260		TTCTCTTATTCTCAGATTTTCTCCTCCGTCCTAAGAGTATCTGCCAGAGGCCAGCACAAA	26658	Hs.589620	GO:0007186|GO:0016021|GO:0005886|GO:0004930|GO:0004984	olfactory receptor, family 7, subfamily C, member 2 [Source:HGNC Symbol;Acc:8374]	113.626	357.516	7.01636	8.2134	93.2067	134.802	112.871	361.841	346.727	363.98	6.89486	6.89404	7.26017	8.15672	8.29254	8.19093
ASHGA5P030681	0.0327527	0.0948011	2.28147	down	protein_coding	ENST00000388988	CCDS42063.1	AGPHD1	GENCODE	1235	chr15	+	78799905	78826012		AAAGCTGTAGAAGAAATCTGGTTTGAAACTGCCAAATCCTATGAATCTGGGATCTCCATG	123688	Hs.307962	GO:0005737|GO:0016301|GO:0016772	aminoglycoside phosphotransferase domain containing 1 [Source:HGNC Symbol;Acc:34403]	5	19.1895	2.45604	3.64601	5	5	5	28.965	16.6369	11.9667	2.46913	2.40305	2.49594	4.30433	3.61059	3.02309
ASHGA5P004616	0.00338318	0.0232287	2.19172	down	protein_coding	NM_173654	CCDS2908.1	EOGT	RefSeq	4152	chr3	-	69024367	69062774		AGTACTGACGTGTACATCGTGATGTGGGACACCGATGGAAAAATTCGAGTCACCATTCTT	285203	Hs.740595	GO:0005788|GO:0006493|GO:0016262	EGF domain-specific O-linked N-acetylglucosamine transferase precursor	1538.2	3855.74	10.5675	11.6995	1680.4	1630.41	1303.79	3771.02	4332.91	3463.3	10.8049	10.3084	10.5891	11.6233	11.9186	11.5567
ASHGA5P000778	0.00127182	0.0135992	2.11148	down	protein_coding	NM_001098506	CCDS46086.1	CEACAM21	RefSeq	1378	chr19	+	42082530	42093197	NM_033543	TACAGAAATTCTCAGATTGAACAGGCATCTCACCATCTCCGTGTATACGAGTCAGTGGCT	90273	Hs.655885	GO:0016021	carcinoembryonic antigen-related cell adhesion molecule 21 isoform 1 precursor	25.0085	88.6051	5.01523	6.09348	18.2802	35.0742	21.6711	92.0055	80.3075	93.5022	4.75746	5.18135	5.10687	6.07308	6.0609	6.14646
ASHGA5P039486	5.54236e-05	0.00319434	2.34543	down	protein_coding	ENST00000273905	CCDS3614.1	SLC10A6	GENCODE	1502	chr4	-	87744620	87770416		TTTCATCTTTCCTTTGATTGGCCATGTCACGGGTTTTCTGCTGGCACTTTTTACCCACCA	345274	Hs.452996	GO:0006814|GO:0055085|GO:0015711|GO:0043251|GO:0016021|GO:0005886|GO:0016020|GO:0008508|GO:0043250	solute carrier family 10 (sodium/bile acid cotransporter family), member 6 [Source:HGNC Symbol;Acc:30603]	27.802	108.966	5.17081	6.40066	23.5625	37.1155	22.728	109.658	107.056	110.185	5.08957	5.25463	5.16824	6.32565	6.49198	6.38436
ASHGA5P033853	0.00169321	0.0156404	2.30126	down	protein_coding	NM_006033	CCDS11938.1	LIPG	RefSeq	4143	chr18	+	47088426	47119278		AGAAATTGAGCCCACCTTTTACGTCACCCTTTATGGCACTAATGCAGATTCCCAGACTCT	9388	Hs.465102	GO:0004465|GO:0004620|GO:0004806|GO:0005615|GO:0006629|GO:0007584|GO:0008201|GO:0008283|GO:0008970|GO:0009395|GO:0010983|GO:0032376|GO:0034375|GO:0042632|GO:0043691|GO:0050253|GO:0050746|GO:0055091	endothelial lipase precursor	54.1029	181.321	5.97807	7.1805	41.4512	84.0839	36.7737	184.71	167.543	191.711	5.8309	6.29411	5.80921	7.12909	7.19355	7.21887
ASHGA5P000979	0.00424011	0.0260014	2.19078	down	protein_coding	NM_002687	CCDS9671.1	PNN	RefSeq	3606	chr14	+	39644386	39652422		ATGTTAAAAAGCCAGCATTGCAGTCTTCAGTTGTAGCTACCTCCAAAGAGCGCACACGTA	5411	Hs.409965	GO:0000398|GO:0003677|GO:0005198|GO:0005634|GO:0005730|GO:0005737|GO:0005882|GO:0005886|GO:0005911|GO:0006351|GO:0006355|GO:0007155|GO:0016607|GO:0030057|GO:0071013	pinin	69.6465	212.9	6.28581	7.41725	54.4061	110.41	44.123	241.263	190.101	207.335	6.18288	6.64305	6.0315	7.5319	7.38527	7.33458
ASHGA5P028251	0.000297168	0.00665471	2.61625	down	protein_coding	ENST00000228347	CCDS9105.1	POLR3B	GENCODE	4273	chr12	+	106751435	106903976		TTTCTTCCTCCTTCGTGAGCAGCATGGACGTGCTAGCGGAGGAGTTTGGGAACCTGACTC	55703	Hs.62696	GO:0006351|GO:0045087|GO:0009615|GO:0010467|GO:0006383|GO:0032728|GO:0045089|GO:0006385|GO:0006386|GO:0005654|GO:0003677|GO:0046872|GO:0003899|GO:0032549	polymerase (RNA) III (DNA directed) polypeptide B [Source:HGNC Symbol;Acc:30348]	126.091	443.481	7.14873	8.53623	101.818	156.104	120.351	428.293	427.232	474.919	7.01975	7.08217	7.34426	8.41015	8.59231	8.60624
ASHGA5P006455	0.000216251	0.00579061	2.72111	down	protein_coding	NM_178526	CCDS32966.1	SLC25A42	RefSeq	3279	chr19	+	19174802	19223841		AACCCCGAAGGAAATGTACAGCAACATCTTTCATGTCTTCATCCGCATCTCGAGAGAAGA	284439	Hs.303669	GO:0005347|GO:0005739|GO:0005743|GO:0015217|GO:0015228|GO:0015866|GO:0015867|GO:0016021|GO:0035349|GO:0043262|GO:0080121|GO:0080122	solute carrier family 25 member 42	31.1872	139.005	5.33017	6.77437	30.7551	38.3978	24.4088	145.142	144.112	127.76	5.43784	5.29519	5.25749	6.76492	6.95001	6.60817
ASHGA5P049218	0.0245502	0.0779273	2.21821	down	protein_coding	NM_001207030		LOC643802	RefSeq	1344	chr16	-	53403273	53405041		TGAAATGTGAGTATTTTGAAACATCCTTTACTTTGTGAGCTGGAATTGCCCAATCAGTGT	643802	Hs.451336		uncharacterized protein LOC643802	5.69356	24.0933	2.93009	4.07948	5	6.29561	5.78507	22.0207	28.9053	21.354	2.46913	2.94739	3.37375	3.86974	4.47227	3.89644
ASHGA5P014536	9.47433e-05	0.00409481	3.03416	down	protein_coding	NM_002976	CCDS46442.1	SCN7A	RefSeq	7186	chr2	-	167260082	167343481		AAATTTACTGGTACTTTACCTGTTTCTGGCATTGGTGAGCTCATTTAGTTCATGCAAGGA	6332	Hs.596087	GO:0001518|GO:0005248|GO:0006814|GO:0006936	sodium channel protein type 7 subunit alpha	5	23.564	2.45604	4.05734	5	5	5	21.9442	23.8809	24.8669	2.46913	2.40305	2.49594	3.86446	4.18189	4.12567
ASHGA5P001592	0.00616443	0.0323675	2.04422	down	protein_coding	ENST00000237889	CCDS2336.1	NDUFB3	GENCODE	755	chr2	+	201936461	201950473		TTGCTGTCAGACATGGCCCATGAACATGGACATGAGCATGGACATCATAAAATGGAACTT	4709	Hs.109760	GO:0044281|GO:0006810|GO:0022904|GO:0006120|GO:0016021|GO:0005739|GO:0005743|GO:0005747|GO:0008137	NADH dehydrogenase (ubiquinone) 1 beta subcomplex, 3, 12kDa [Source:HGNC Symbol;Acc:7698]	5404.7	12164.4	12.3472	13.3788	4916.05	7426.47	3871.58	12641.6	10129.1	13722.4	12.3128	12.599	12.13	13.3902	13.1313	13.6149
ASHGA5P048095	0.000483232	0.00847617	2.95755	down	protein_coding	ENST00000278409	CCDS31515.1	OR5F1	GENCODE	945	chr11	-	55761156	55762101		GAAGTAAAGAAGGCTTTAGCGAATGTAATTAGCAGGAAAAGGACCTCTTCCTTTCTGTGA	338674	Hs.553702	GO:0007186|GO:0007608|GO:0050911|GO:0016021|GO:0005886|GO:0004930|GO:0004984	olfactory receptor, family 5, subfamily F, member 1 [Source:HGNC Symbol;Acc:8343]	5	23.3037	2.45604	4.02044	5	5	5	24.1229	18.3559	27.4324	2.46913	2.40305	2.49594	4.01253	3.76831	4.2805
ASHGA5P011358	0.0351671	0.0993959	2.08377	down	protein_coding	NM_001190987	CCDS53332.1	SRSF11	RefSeq	2805	chr1	+	70671364	70717701	NM_004768	TATGCAGAAGGAGTTATTCCTGATGAAGCTAAAGCTTTGTCTCTGTTGGCACCAGCTAAT	9295	Hs.479693	GO:0000166|GO:0000398|GO:0003723|GO:0005515|GO:0005634|GO:0005654|GO:0005730|GO:0006366|GO:0006369|GO:0006397|GO:0006406|GO:0008380|GO:0010467|GO:0031124	serine/arginine-rich splicing factor 11 isoform 2	259.921	594.422	7.91909	8.97829	156.961	475.014	147.788	673.054	586.969	523.242	7.58224	8.55885	7.61618	9.09436	9.08172	8.75879
ASHGA5P032407	0.0378413	0.104265	2.89734	down	protein_coding	ENST00000345847	CCDS54125.1	KRTAP4-6	GENCODE	1055	chr17	-	39295684	39296739		TACAGCAATGTTTCTGTATCTTATTTTTGCTGCTTCTGAATAAAACTCCACTTTTGTCGC	81871	Hs.307014	GO:0045095	keratin associated protein 4-6 [Source:HGNC Symbol;Acc:18909]	8.66455	40.0589	3.33791	4.87263	5	14.4941	6.49955	33.3467	47.0743	39.7556	2.46913	4.02803	3.51656	4.52479	5.23328	4.85983
ASHGA5P009788	0.00326053	0.0227407	2.2528	down	protein_coding	NM_001851	CCDS4971.1	COL9A1	RefSeq	3805	chr6	-	70925742	71012786		ATGAAGACCTGCTGGAAAATTCCAGTTTTCTTCTTTGTGTGCAGTTTCCTGGAACCCTGG	1297	Hs.590892	GO:0001894|GO:0002062|GO:0003417|GO:0005576|GO:0005594|GO:0005594|GO:0005788|GO:0007411|GO:0009887|GO:0030020|GO:0030198|GO:0046872	collagen alpha-1(IX) chain isoform 1 precursor	15.6142	63.0941	4.39764	5.56937	12.393	21.5305	12.919	64.6377	71.1224	53.5221	4.23597	4.54087	4.41609	5.52972	5.87093	5.30745
ASHGA5P003211	0.000287345	0.00658486	2.68467	down	protein_coding	NM_003873	CCDS7177.1	NRP1	RefSeq	5895	chr10	-	33466418	33623833	NM_001024628	AGTGGAACAGGTGATGACTTCCAGCTCACAGGTGGCACCACTGTGCTGGCCACAGAAAAG	8829	Hs.131704	GO:0001525|GO:0001938|GO:0002116|GO:0005021|GO:0005576|GO:0005829|GO:0005886|GO:0005886|GO:0007155|GO:0007165|GO:0007267|GO:0007411|GO:0007411|GO:0008201|GO:0009887|GO:0010595|GO:0014911|GO:0015026|GO:0016021|GO:0017154|GO:0019838|GO:0019838|GO:0019955|GO:0031410|GO:0035729|GO:0035767|GO:0038084|GO:0038084|GO:0043235|GO:0046872|GO:0048008|GO:0048010|GO:0048010|GO:0048012|GO:0050731|GO:0060301|GO:…	neuropilin-1 isoform a precursor	3350.67	10043.3	11.6676	13.0924	3590.86	3689.33	2771.83	9521.96	10352.7	10255.2	11.8565	11.5105	11.6358	12.9636	13.1542	13.1592
ASHGA5P004523	0.0258887	0.0808461	2.08933	down	protein_coding	ENST00000294172	CCDS8037.1	NXF1	GENCODE	2346	chr11	-	62559597	62572964	NM_001081491	TTGAAGAGTCTGGTCTTGCACTTCCTGCAACAGTACTATGCAATTTACGACTCTGGAGAC	10482	Hs.523739	GO:0006810|GO:0010467|GO:0051028|GO:0016973|GO:0006406|GO:0044419|GO:0006405|GO:0005634|GO:0005737|GO:0005622|GO:0005829|GO:0005654|GO:0005643|GO:0016607|GO:0042405|GO:0000166|GO:0003723|GO:0005515|GO:0003729|GO:0005487	nuclear RNA export factor 1 [Source:HGNC Symbol;Acc:8071]	702.903	1616.66	9.32644	10.3895	483.788	1164.96	459.957	1712.56	1157.65	1979.76	9.05851	9.81212	9.1087	10.4427	10.0403	10.6854
ASHGA5P012075	0.0138499	0.0536663	2.62241	down	protein_coding	NM_001193335		ASPN	RefSeq	2308	chr9	-	95218488	95244844		CAGTTCCTAAAGATAATCTTCCTTCATTCTAATTCAATTGCAAGAGTGGGAGTAAATGAC	54829	Hs.435655	GO:0005509|GO:0005578|GO:0030282|GO:0030512|GO:0031012|GO:0070171	asporin isoform 2 preproprotein	12.7863	58.4822	4.05748	5.44837	6.69705	19.6467	12.0151	58.1974	50.019	67.2301	3.42745	4.42595	4.31905	5.37077	5.32556	5.64879
ASHGA5P009097	0.0385056	0.105477	2.22529	down	protein_coding	NM_145897	CCDS8854.1	PFDN5	RefSeq	608	chr12	+	53689234	53693234		GAGCTGAATCTGCCGCAGCTAGAAATGCTCAAGAACCAGCTGGACCAGATGTATGTCCCT	5204	Hs.655327	GO:0003714|GO:0005515|GO:0005634|GO:0005737|GO:0006355|GO:0006457|GO:0016272|GO:0044267|GO:0045892|GO:0051082|GO:0051084|GO:0060041|GO:0090090	prefoldin subunit 5 isoform gamma	2205.83	5693.07	11.0329	12.1869	1818.46	3214.02	1585.01	5419.17	3457.8	8202.25	10.9204	11.3095	10.8687	12.1247	11.6079	12.828
ASHGA5P012339	0.0157053	0.0578279	3.42025	down	protein_coding	ENST00000377340	CCDS33446.1	CRNKL1	GENCODE	4406	chr20	-	20015011	20036690		TTGGGAAATGCTGTTGACAAAAACACATCCAGATTGGAGCTCCGTTCTTACTCCCTTGCA	51340	Hs.171342	GO:0006397|GO:0006396|GO:0000398|GO:0000245|GO:0005634|GO:0005737|GO:0005622|GO:0005681|GO:0016607|GO:0071013|GO:0003723|GO:0005515	crooked neck pre-mRNA splicing factor-like 1 (Drosophila) [Source:HGNC Symbol;Acc:15762]	7.37668	35.4693	2.92002	4.69412	5	12.13	5	38.9849	33.663	33.7599	2.46913	3.79498	2.49594	4.76353	4.71238	4.60644
ASHGA5P055319	0.000248903	0.00618253	2.83001	down	protein_coding	NM_001145946	CCDS53757.1	SLCO1C1	RefSeq	3471	chr12	+	20848288	20906320	NM_001145944	ATGTCTTCAGGTACCAAATCAAAAGCATTCCCGCATCTCATTGCTACAGCATCCCAGATT	53919	Hs.47261	GO:0005886|GO:0015125|GO:0016021|GO:0043252|GO:0055085	solute carrier organic anion transporter family member 1C1 isoform 1	11.5825	60.7284	4.01473	5.51553	12.3055	14.2056	8.23626	62.6945	58.9593	60.5314	4.22586	4.00031	3.81802	5.48273	5.57585	5.48802
ASHGA5P007882	0.00234543	0.0188841	2.0962	down	protein_coding	NM_014836	CCDS7261.1	RHOBTB1	RefSeq	4515	chr10	-	62629197	62704033	NR_024554, NR_024555	GTGTTCTGTTCTTCACTTCCAGCAAGCCAGAGTTTCATAAATGGACGCTGACATGGACTA	9886	Hs.148670	GO:0005525|GO:0005829|GO:0005886|GO:0007264|GO:0051056	rho-related BTB domain-containing protein 1	51.3805	160.711	5.92284	6.99062	37.9814	78.5465	37.6134	177.871	147.193	157.07	5.71954	6.21272	5.83625	7.0707	6.9842	6.91695
ASHGA5P003799	9.78898e-05	0.00410757	2.00606	down	protein_coding	NM_001122	CCDS6490.1	PLIN2	RefSeq	2029	chr9	-	19115758	19127604	NR_038064	GCTGTTGGTAGAACAGTACCTCCCTCTCACTGAGGAAGAACTAGAAAAAGAAGCAAAAAA	123	Hs.3416	GO:0005576|GO:0005634|GO:0005783|GO:0005811|GO:0005886|GO:0014070|GO:0015909|GO:0019915|GO:0042493|GO:0044255|GO:0044281	perilipin-2	1971.83	4466.7	10.9064	11.9108	1800.89	2578.62	1535.98	4422.15	4283.71	4694.22	10.908	10.9879	10.8234	11.8411	11.9012	11.9901
ASHGA5P002631	0.0013984	0.0142819	2.3707	down	protein_coding	NM_012245	CCDS9867.1	SNW1	RefSeq	2146	chr14	-	78183943	78227497		TGGCGCTCACCAGCTTTTTACCTGCACCTACTCAGCTATCTCAGGACCAGCTTGAGGCTG	22938	Hs.445498	GO:0000398|GO:0000398|GO:0000785|GO:0005112|GO:0005515|GO:0005634|GO:0005654|GO:0005681|GO:0005730|GO:0006357|GO:0006367|GO:0007219|GO:0010467|GO:0035257|GO:0044428|GO:0045892|GO:0045944|GO:0048384|GO:0050769|GO:0071013|GO:0071300	SNW domain-containing protein 1	55.8476	193.065	6.03124	7.27656	39.4361	83.9157	44.191	191.707	179.762	207.727	5.76765	6.2926	6.03348	7.1906	7.30001	7.33906
ASHGA5P006889	0.0006509	0.00968062	2.4715	down	protein_coding	ENST00000325157	CCDS13998.1	ENTHD1	GENCODE	2710	chr22	-	40139048	40289794		TCAAGACAACCACACGGGTTTCAACTGCTTCTGAGGGAGCATCTTCCTTTTCTCCTTTAT	150350	Hs.474869	GO:0006886	ENTH domain containing 1 [Source:HGNC Symbol;Acc:26352]	23.8699	100.357	4.97589	6.28128	18.1502	30.8472	22.6121	102.924	100.919	97.2263	4.74815	5.01771	5.16182	6.23522	6.40163	6.20698
ASHGA5P009259	0.00647169	0.033346	2.0941	down	protein_coding	NM_000275	CCDS10020.1	OCA2	RefSeq	3154	chr15	-	28000022	28344458		ATGGATATGGGTTCTCCTTCATGGAATTTTTCAGGCTGGGCTTCCCAATGATGGTTGTGT	4948	Hs.654411	GO:0005215|GO:0005302|GO:0005515|GO:0005737|GO:0005765|GO:0005789|GO:0006726|GO:0007286|GO:0008283|GO:0010008|GO:0015105|GO:0015828|GO:0016021|GO:0030318|GO:0033162|GO:0042438	P protein	24.544	88.8397	5.02758	6.09391	19.1713	27.1187	27.3419	95.8907	75.4994	95.1291	4.81875	4.84759	5.4164	6.13739	5.96893	6.17542
ASHGA5P003634	0.00337525	0.0231995	2.36484	down	protein_coding	NM_014607	CCDS42761.1	UBXN4	RefSeq	4018	chr2	+	136499188	136542633		ATGCTCAGATCAGAGACCTGCAGAGGACCTCAACATCCGAGTGGAAAGACTAACAAAAAA	23190	Hs.591242	GO:0005515|GO:0005634|GO:0005635|GO:0005730|GO:0005737|GO:0005783|GO:0005789|GO:0006986	UBX domain-containing protein 4	5093.91	13334.8	12.268	13.5097	5899.96	5584.06	3797.71	13187.8	15667.6	11149.1	12.5646	12.1388	12.1005	13.4498	13.7633	13.3161
ASHGA5P008112	0.000704351	0.0101069	2.21642	down	protein_coding	NM_019619	CCDS7178.1	PARD3	RefSeq	6013	chr10	-	34398487	35104253	ENST00000340077, NM_001184785, NM_001184787, NM_001184793	GCCTTCCACCCAAGGGAACTGAATGCAGAGCCAAGCCAGATGCAGATTCCAAAAGAAACG	56288	Hs.131489	GO:0000226|GO:0003383|GO:0005080|GO:0005515|GO:0005546|GO:0005547|GO:0005819|GO:0005829|GO:0005886|GO:0005911|GO:0005911|GO:0005913|GO:0005923|GO:0005923|GO:0005938|GO:0006461|GO:0006612|GO:0007049|GO:0007163|GO:0007179|GO:0007205|GO:0007409|GO:0008356|GO:0012505|GO:0030054|GO:0032266|GO:0032970|GO:0034329|GO:0043234|GO:0044319|GO:0045177|GO:0045216|GO:0051642|GO:0070830|GO:0070830|GO:0090162	partitioning defective 3 homolog isoform 1	77.2086	242.657	6.46571	7.61394	59.8393	111.96	59.8262	254.39	204.88	268.7	6.30854	6.66006	6.42852	7.61583	7.50108	7.7249
ASHGA5P008800	1.55425e-05	0.00226615	2.28528	down	protein_coding	NM_018262	CCDS3059.1	IFT122	RefSeq	3837	chr3	+	129158967	129239190	NM_052989	TGAAGTACACGCACAATGATGCTATACAATGTGTCTCCTACAATCCTATTACTCATCAAC	55764	Hs.655284	GO:0001843|GO:0005515|GO:0005737|GO:0005932|GO:0010172|GO:0032391|GO:0035050|GO:0048593|GO:0060173|GO:0060271	intraflagellar transport protein 122 homolog isoform 3	13.6689	57.3656	4.23354	5.42591	12.7553	17.5922	10.6591	62.1924	52.5693	57.3353	4.27215	4.27981	4.14865	5.47007	5.3994	5.40825
ASHGA5P026938	0.00712396	0.0352205	3.37506	down	protein_coding	NM_001080407	CCDS44780.1	GLB1L3	RefSeq	2959	chr11	+	134146274	134189458		TATCTCATCAGGTTTTGCTCCTCGGTTTAAGCAGGAAGAGAACTTCATGCTTGGAAGAGC	112937	Hs.721382	GO:0004565|GO:0005975|GO:0043169	beta-galactosidase-1-like protein 3	7.30768	41.2921	3.16683	4.92175	6.95357	9.96948	5	41.5961	35.9733	46.3071	3.47024	3.53432	2.49594	4.85925	4.81988	5.08612
ASHGA5P009291	0.0124577	0.0500022	2.21298	down	protein_coding	NM_001136129	CCDS46638.1	APP	RefSeq	3255	chr21	-	27252860	27543138	NM_001136130	GGCGCTGGAGGTCTACCCTGAACTGCAGATCACCAATGTGGTAGAAGCCAACCAACCAGT	351	Hs.434980	GO:0000085|GO:0002576|GO:0003677|GO:0004867|GO:0005102|GO:0005515|GO:0005576|GO:0005737|GO:0005737|GO:0005794|GO:0005794|GO:0005829|GO:0005886|GO:0005887|GO:0005905|GO:0006378|GO:0006417|GO:0006468|GO:0006878|GO:0006897|GO:0007155|GO:0007176|GO:0007219|GO:0007409|GO:0007596|GO:0007617|GO:0007626|GO:0008088|GO:0008201|GO:0008344|GO:0008542|GO:0009986|GO:0016021|GO:0016199|GO:0016322|GO:0016358|GO:…	amyloid beta A4 protein isoform e precursor	273.513	729.978	8.09179	9.23778	205.99	422.257	192.292	686.907	533.684	969.342	7.92148	8.40311	7.95077	9.12445	8.93573	9.65316
ASHGA5P016919	0.0485882	0.123601	2.46395	down	protein_coding	ENST00000435680	CCDS45204.1	MTMR10	GENCODE	4961	chr15	-	31231143	31283807		TGCTAAAAAGGTATGCCTTGCAATAGCTCATTATTCCCAGCCAACAGACCTCCAGCTACT	54893	Hs.30141	GO:0016311|GO:0016791	myotubularin related protein 10 [Source:HGNC Symbol;Acc:25999]	570.513	1613.78	9.04429	10.3453	301.659	889.899	519.981	2251.63	1602.22	987.493	8.43142	9.42283	9.27862	10.8456	10.5086	9.68166
ASHGA5P030717	0.000980594	0.0118582	4.43656	down	protein_coding	ENST00000258888	CCDS10333.1	ALPK3	GENCODE	10917	chr15	+	85359910	85416713		AAGCTGTGGTGCCAGTTTTTCAACATTCTTAGTGACTCAGTCTTGACATGGGCCAAGGAT	57538	Hs.459183	GO:0007507|GO:0006468|GO:0005634|GO:0005515|GO:0005524|GO:0004674|GO:0016772	alpha-kinase 3 [Source:HGNC Symbol;Acc:17574]	5.9651	39.9479	2.72855	4.87799	5	7.89529	5	43.9484	36.6436	39.2517	2.46913	3.22058	2.49594	4.94421	4.84875	4.84101
ASHGA5P002090	0.0144945	0.0551205	2.90527	down	protein_coding	NM_013236	CCDS14070.1	ATXN10	RefSeq	3340	chr22	+	46067677	46241187		AGCGGAACCGAGAAACAGCACCCAGGACTATCTTCCAAAGAGTTCTGGATATCCTAAAGA	25814	Hs.475125	GO:0005515|GO:0005737|GO:0007399|GO:0008219|GO:0030425|GO:0031175|GO:0043025|GO:0048471	ataxin-10 isoform 1	492.659	1519.41	8.78073	10.3194	243.803	873.896	360.277	1812.15	1262	1484.08	8.15335	9.39196	8.79687	10.5194	10.1676	10.2712
ASHGA5P009958	0.0114744	0.0473365	2.59928	down	protein_coding	NM_138468	CCDS2354.1	ICA1L	RefSeq	7996	chr2	-	203637872	203736371		GCGTTCAACAACTGGGTCTCCCAAGAGGAATCAGAACTTTGTCTTTCACACACTGATAAC	130026	Hs.516629	GO:0019904	islet cell autoantigen 1-like protein isoform 1	381.886	1223.93	8.62409	10.0022	427.295	370.219	348.144	1225.02	1512.05	934.712	8.89815	8.22493	8.74921	9.97037	10.4247	9.61156
ASHGA5P008754	0.0418813	0.111535	2.06375	down	protein_coding	ENST00000346736	CCDS12299.1	C19orf57	GENCODE	2420	chr19	-	13993167	14016909		CCCAGCCGAGCCGGCTGATCATGGGCACCCACCGGGACCTGGAAGCTTTCAAGCGCCTTA	79173	Hs.143288	GO:0007275|GO:0005575|GO:0003674|GO:0005515	chromosome 19 open reading frame 57 [Source:HGNC Symbol;Acc:28153]	6.19818	20.5064	2.76711	3.81238	5	8.59453	5	17.0149	18.6967	25.8077	2.46913	3.33625	2.49594	3.45438	3.79937	4.18338
ASHGA5P052727	0.00414659	0.0256973	2.00181	down	protein_coding	NM_001168370	CCDS55003.1	CUL7	RefSeq	5527	chr6	-	43005354	43021683		ATACAAGCCCTGTCCTCCCATGACGCTGGTGAGGGGCAGTGTGGGGAGGAAGGGAAAGCA	9820	Hs.520136	GO:0001570|GO:0005515|GO:0005634|GO:0005680|GO:0005730|GO:0005737|GO:0005829|GO:0006508|GO:0006511|GO:0006987|GO:0016567|GO:0019048|GO:0030968|GO:0031625	cullin-7 isoform 1	60.5244	185.741	6.21569	7.21699	60.4064	64.8012	56.3658	201.123	190.775	165.326	6.32212	5.97066	6.35428	7.26551	7.39163	6.99384
ASHGA5P034686	0.00131781	0.013904	2.26268	down	protein_coding	NM_015603	CCDS12698.1	CCDC9	RefSeq	2093	chr19	+	47759730	47775210		TACTTTTGGGGAGTTCCTGTCCCAGCACAAAGCTGAGGCCAGCAGCCGCAGAAGGAGAAA	26093	Hs.227782		coiled-coil domain-containing protein 9	10.8024	46.0597	3.91674	5.09478	7.87689	14.0485	10.4817	49.1956	42.2975	46.6858	3.635	3.988	4.12722	5.11563	5.07059	5.09812
ASHGA5P037331	0.00335015	0.0230984	7.28688	down	protein_coding	ENST00000269844	CCDS13676.1	PRDM15	GENCODE	4710	chr21	-	43221324	43299591		TTCAGTGACTGTGAGTTTCCATATGAGTTTTGCACGGTCTGCTTTTCACCCTTCAAGCTG	63977	Hs.473893	GO:0006351|GO:0006355|GO:0005634|GO:0005622|GO:0003677|GO:0008270|GO:0005515	PR domain containing 15 [Source:HGNC Symbol;Acc:13999]	7.56119	73.4188	2.94012	5.80542	5	12.6836	5	74.6331	70.4724	75.1509	2.46913	3.85529	2.49594	5.7459	5.85605	5.81431
ASHGA5P010715	0.000983407	0.0118856	2.14822	down	protein_coding	NM_001136224	CCDS44313.1	RCOR3	RefSeq	4232	chr1	+	211432707	211489725		ATTAATGCCCGTTGGACCACAGAGGAGCAGCTTCTAGCAGTGCAAGGCACAGACCCCACA	55758	Hs.356399	GO:0003677|GO:0003682|GO:0005515|GO:0005634|GO:0006351|GO:0006355	REST corepressor 3 isoform b	201.651	542.539	7.72871	8.83185	177.159	284.452	143.342	624.69	445.732	557.197	7.73333	7.87364	7.57915	8.98457	8.65738	8.85362
ASHGA5P013166	0.00967951	0.0427672	4.51346	down	protein_coding	NM_005199	CCDS33400.1	CHRNG	RefSeq	2187	chr2	+	233404436	233411038		TTATCTTCCAGTCCCAGACTTACAGCACCAATGAGATTGATCTGCAGCTGAGTCAGGAAG	1146	Hs.248101	GO:0004889|GO:0005886|GO:0005887|GO:0006810|GO:0006936|GO:0007165|GO:0007268|GO:0015267|GO:0015464|GO:0030054|GO:0045211	acetylcholine receptor subunit gamma precursor	7.97359	60.2845	3.30347	5.4777	5	10.9213	7.99944	49.0556	55.8034	75.9943	2.46913	3.65856	3.78272	5.11121	5.48802	5.83388
ASHGA5P006718	0.00546429	0.0300836	2.08596	down	protein_coding	NM_002389	CCDS1485.1	CD46	RefSeq	3402	chr1	+	207925382	207968861	NM_172359	CAAAGTGTCTTAAAGTGCTGCCTCCATCTAGTACAAAACCTCCAGCTTTGAGTCATTCAG	4179	Hs.510402	GO:0001848|GO:0002079|GO:0004175|GO:0004857|GO:0004872|GO:0005794|GO:0005886|GO:0005887|GO:0006508|GO:0006958|GO:0007338|GO:0009986|GO:0016323|GO:0019048|GO:0030449|GO:0045087|GO:0045916	membrane cofactor protein isoform 1 precursor	234.35	595.225	7.91209	8.97279	160.227	335.81	207.014	699.293	569.208	517.173	7.61138	8.08224	8.04263	9.15224	9.02728	8.73887
ASHGA5P055900	0.000157618	0.0050762	3.37128	down	protein_coding	NM_020366	CCDS45080.1	RPGRIP1	RefSeq	3950	chr14	+	21756135	21819460		AGTGTCATAAGTATGGCTAAACCCATTGGTCTATGCATGCCTAACAGTGCCCACATCATG	57096	Hs.126035	GO:0005515|GO:0005929|GO:0007601|GO:0050896	X-linked retinitis pigmentosa GTPase regulator-interacting protein 1	5	26.2233	2.45604	4.20934	5	5	5	28.938	20.8225	28.9093	2.46913	2.40305	2.49594	4.30264	3.96451	4.36086
ASHGA5P053814	0.0121071	0.0490794	3.6043	down	protein_coding	NM_004099	CCDS6830.1	STOM	RefSeq	3108	chr9	-	124101265	124132582	NR_073037	AATTAAGGATGTGAAACTACCTGTGCAGCTCCAGAGAGCTATGGCTGCAGAAGCAGAAGC	2040	Hs.253903	GO:0005737|GO:0005856|GO:0005887|GO:0042470|GO:0045121|GO:0051260	erythrocyte band 7 integral membrane protein isoform a	62.1381	292.626	6.02723	7.87695	28.5718	112.306	45.5369	343.607	205.338	328.932	5.34449	6.66412	6.07308	8.0874	7.5053	8.03815
ASHGA5P007125	0.0015455	0.0149902	3.15384	down	protein_coding	NM_001005473	CCDS34150.1	PLCXD3	RefSeq	7739	chr5	-	41307047	41510730		TTAGCCATTCCAGGGTCTCATGATTCCTTCAGCTTCTACATTGATGAAGCCTCTCCAGTA	345557	Hs.145404	GO:0004629|GO:0004871|GO:0005622|GO:0016042|GO:0035556	PI-PLC X domain-containing protein 3	11.1031	62.1612	3.89671	5.55382	7.76742	17.3625	8.17948	63.3245	65.5089	57.6501	3.61663	4.26499	3.8085	5.49903	5.74393	5.4185
ASHGA5P053296	2.9487e-05	0.00269605	2.01034	down	protein_coding	NM_001174044	CCDS5791.1	SPAM1	RefSeq	2241	chr7	+	123565285	123600100	NM_001174045, NM_001174046, NM_153189	ACAATGCTTCACCCTCCACACTATCTGCCACAATGTTCATTGTTAGTATTTTGTTTCTTA	6677	Hs.121494	GO:0004415|GO:0005886|GO:0005975|GO:0007155|GO:0007339|GO:0007342|GO:0031225	hyaluronidase PH-20 isoform 2	312.792	759.268	8.33704	9.34448	298.446	386.711	253.22	820.146	699.86	757.797	8.41773	8.28499	8.30839	9.38843	9.3407	9.30431
ASHGA5P005387	0.0286633	0.0867162	2.05001	down	protein_coding	NM_001002033	CCDS45772.1	HN1	RefSeq	1696	chr17	-	73131343	73150774	NM_016185	AACTCCTCTGAAGCAAGCTCCGGAGACTTCTTAGATCTGAAGGGAGAAGGTGATATTCAT	51155	Hs.532803	GO:0005634	hematological and neurological expressed 1 protein isoform 3	6150.12	14144.4	12.5302	13.5658	5251.44	8751.54	4447.36	12992	10624.2	18817	12.4147	12.868	12.3079	13.4317	13.2023	14.0634
ASHGA5P009752	0.000257249	0.00625326	2.27082	down	protein_coding	NM_004013	CCDS48091.1	DMD	RefSeq	7410	chrX	-	31137344	32173586	NM_000109, NM_004006, NM_004007, NM_004009, NM_004010, NM_004011, NM_004012, NM_004014, NM_004015, NM_004017, NM_004020	ACTCAACAACTCCTTCCCTAGTTCAAGAGGAAGAAATACCCCTGGAAAGCCAATGAGAGA	1756	Hs.495912	GO:0002162|GO:0003779|GO:0005200|GO:0005515|GO:0005829|GO:0005856|GO:0007517|GO:0008270|GO:0008307|GO:0008307|GO:0009986|GO:0016010|GO:0016010|GO:0016010|GO:0030049|GO:0042383|GO:0043034|GO:0043043|GO:0043234|GO:0050998	dystrophin Dp140 isoform	430.955	1155.6	8.7636	9.94682	349.703	538.839	404.322	1152.16	1083.63	1231.02	8.63489	8.71571	8.9402	9.88745	9.95537	9.99763
ASHGA5P034552	0.0238346	0.0763175	2.38528	down	protein_coding	ENST00000221770	CCDS12416.1	POP4	GENCODE	2594	chr19	+	30097169	30108162		AAAGGCCTCTCTGCCAGGCAAAGGAGGGAGCTGCGGCTCTTTGACATTAAACCAGAGCAG	10775	Hs.412870	GO:0006364|GO:0008033|GO:0006379|GO:0000172|GO:0030677|GO:0005655|GO:0003723|GO:0005515|GO:0004540|GO:0004526	processing of precursor 4, ribonuclease P/MRP subunit (S. cerevisiae) [Source:HGNC Symbol;Acc:30081]	308.1	869.133	8.21119	9.46535	209.745	505.871	208.684	822.1	567.405	1217.89	7.94353	8.63574	8.05431	9.3931	9.01917	9.98378
ASHGA5P010400	0.00169753	0.0156634	2.15524	down	protein_coding	NM_014241	CCDS7121.1	PTPLA	RefSeq	1323	chr10	-	17631957	17659373		CACATTCAGCCTTCTTGACCACTTGCCATACTTCATTAAATGGGCCAGATATAATTTTTT	9200	Hs.114062	GO:0004725|GO:0005789|GO:0006470|GO:0006633|GO:0007165|GO:0007275|GO:0016021|GO:0016829|GO:0035335	3-hydroxyacyl-CoA dehydratase 1	3697.81	9076.68	11.8267	12.9345	3853.15	3969.97	3270.3	9277.99	10105.1	7846.99	11.9684	11.6275	11.8842	12.9188	13.1264	12.7583
ASHGA5P033955	0.0206954	0.0695316	2.5216	down	protein_coding	NM_012458	CCDS12089.1	TIMM13	RefSeq	1977	chr19	-	2425621	2427875		ATGACGGACAAGTGTTTCCGGAAGTGTATAGGGAAACCTGGGGGCTCCCTGGACAACTCC	26517	Hs.75056	GO:0005743|GO:0006626|GO:0007605|GO:0008270|GO:0042719|GO:0044267|GO:0045039|GO:0072321	mitochondrial import inner membrane translocase subunit Tim13	3151.77	8839.63	11.5315	12.8658	2477.39	4607.59	2370.32	7622.38	6328.28	12568.2	11.3243	11.8661	11.4041	12.6365	12.4671	13.4939
ASHGA5P039817	0.000800754	0.0107828	2.84771	down	protein_coding	NM_001040071		LOC650293	RefSeq	651	chr4	+	8951476	8952127		CTATAAAATCGTCACCTCCATTCTCAGGATTTCATCTTCAGATGGGAAGTATAAAGCCTT	650293	Hs.535167		seven transmembrane helix receptor precursor	25.2729	119.717	5.03383	6.54364	18.8919	34.9516	21.9753	108.885	122.798	127.468	4.80103	5.17703	5.12345	6.31798	6.70744	6.6055
ASHGA5P037044	1.70079e-06	0.00127712	4.19559	down	protein_coding	NM_032588	CCDS273.1	TRIM63	RefSeq	1771	chr1	-	26377795	26394125		TTCTTTACTTTGGATTTAGAGCACATAGCAGACGCCCTGAGAGCCATTGACTTTGGGACA	84676	Hs.279709	GO:0004842|GO:0004871|GO:0005634|GO:0005737|GO:0005737|GO:0005874|GO:0007165|GO:0008270|GO:0031432|GO:0043161	E3 ubiquitin-protein ligase TRIM63	5	31.7218	2.45604	4.52492	5	5	5	32.8682	31.2995	30.9977	2.46913	2.40305	2.49594	4.50199	4.60095	4.47182
ASHGA5P007256	0.0228027	0.0741783	3.9377	down	protein_coding	NM_032778	CCDS2929.1	MINA	RefSeq	5339	chr3	-	97660660	97691295	NM_001042533	TGAAGTTCAGGTTTGCATTTCCTTACTGCTTTGTCTTGAAGACAGAACGATGCCAAAGAA	84864	Hs.570562	GO:0005634|GO:0005730|GO:0005737|GO:0042254	MYC-induced nuclear antigen isoform b	8.47611	43.4994	3.02472	5.00207	5	15.4283	5	41.7901	39.6405	49.0675	2.46913	4.10908	2.49594	4.8664	4.96833	5.17147
ASHGA5P011464	0.000355301	0.00724	2.84657	down	protein_coding	NM_016219	CCDS7029.1	MAN1B1	RefSeq	2787	chr9	+	139981378	140003639	NR_045720	TTTTCTGTGGACTCCTCTTCTACATCAACTTGGCTGACCATTGGAAAGCTCTGGCTTTCA	11253	Hs.279881	GO:0004571|GO:0004571|GO:0005509|GO:0005783|GO:0005789|GO:0006457|GO:0006487|GO:0009311|GO:0016020|GO:0016021|GO:0018279|GO:0030433|GO:0043687|GO:0044267|GO:0044322	endoplasmic reticulum mannosyl-oligosaccharide 1,2-alpha-mannosidase	26.3981	125.773	5.11145	6.62068	21.4101	33.5757	24.2086	132.643	130.524	114.15	4.96189	5.12518	5.24728	6.62352	6.80216	6.43635
ASHGA5P055006	0.00709182	0.0351157	2.312	down	protein_coding	NM_177423	CCDS31628.1	PPFIA1	RefSeq	4062	chr11	+	70116805	70224598		CAGATGGACGGTATGTGATGGGTCACACTAACCTGTCACTTGTTGGGAGCATGAGCAGCT	8500	Hs.530749	GO:0004871|GO:0005515|GO:0005737|GO:0007160|GO:0007165	liprin-alpha-1 isoform a	428.88	1201.46	8.78009	9.98924	455.792	436.656	394.193	1231.74	1370.37	1002.28	8.98318	8.44868	8.90841	9.98062	10.2873	9.6998
ASHGA5P038930	0.0311934	0.0917127	2.77944	down	protein_coding	ENST00000261058	CCDS2949.1	CCDC54	GENCODE	1294	chr3	+	107096187	107097481		AGTTATGTTCTGCTTTGCTTGGCACAAAATAAATGTAACCTGGAGGCTCCAAGTATTCAC	84692	Hs.164799		coiled-coil domain containing 54 [Source:HGNC Symbol;Acc:30703]	8.27104	38.3693	3.31959	4.79438	5	12.7589	7.05422	44.8683	29.8001	40.4395	2.46913	3.86356	3.62607	4.97695	4.51909	4.88711
ASHGA5P000946	0.000745074	0.0103878	2.5435	down	protein_coding	ENST00000216294	CCDS9755.1	SNAPC1	GENCODE	2656	chr14	+	62229074	62263146		TTGAGTGGAACAGAGTTCACTGCATCCAAGAAGAGGAGAAAACACTGAACAAAGAGCCTG	6617	Hs.179312	GO:0006355|GO:0010467|GO:0006383|GO:0005654|GO:0003677	small nuclear RNA activating complex, polypeptide 1, 43kDa [Source:HGNC Symbol;Acc:11134]	3211.01	9187.1	11.6061	12.9529	3150.33	3555.47	2927.23	9082.5	10503.2	7975.56	11.6495	11.4515	11.7172	12.8861	13.1877	12.7849
ASHGA5P055213	0.00169599	0.0156558	2.83854	down	protein_coding	NM_001005468	CCDS31708.1	OR8B2	RefSeq	942	chr11	-	124252297	124253239	NM_001005467	TTATCTCCAATGTTGGGTGCATGACTCGGCTGTTTTTCTTTCTCTTTTTCGTCATCTCTG	26595	Hs.576944	GO:0004930|GO:0004984|GO:0005886|GO:0016021	olfactory receptor 8B2	42.4184	186.262	5.71912	7.22426	30.0128	52.9458	44.2965	190.275	190.617	177.895	5.40768	5.71208	6.0376	7.17746	7.38957	7.10576
ASHGA5P053962	0.00128133	0.0136692	2.0531	down	protein_coding	NM_001123385	CCDS48093.1	BCOR	RefSeq	6436	chrX	-	39910498	39956719		TGAATTAACAGGGCTCCATCCTAAAAAACAACGCCACTTGCTGCACCTTAGAGAACGATG	54880	Hs.659681	GO:0000122|GO:0000415|GO:0003714|GO:0003714|GO:0004842|GO:0005515|GO:0005634|GO:0006351|GO:0007507|GO:0008134|GO:0030502|GO:0031072|GO:0031519|GO:0035518|GO:0042476|GO:0042826|GO:0044212|GO:0045892|GO:0045892|GO:0051572|GO:0060021|GO:0065001|GO:0070171	BCL-6 corepressor isoform c	37.8333	125.586	5.57824	6.61604	35.1429	49.1109	29.2462	135.665	130.943	110.149	5.61379	5.6121	5.50882	6.65845	6.80618	6.38351
ASHGA5P048352	0.0407574	0.109548	2.23889	down	protein_coding	NM_012296	CCDS8260.1	GAB2	RefSeq	6062	chr11	-	77926335	78052926	NM_080491	AGAGCGTCTACATCCCAATGAGCCCAGGGGCCCATCACTTTGACTCACTTGGCTACCCAT	9846	Hs.429434	GO:0005068|GO:0005070|GO:0005515|GO:0005547|GO:0005737|GO:0005829|GO:0005886|GO:0007169|GO:0007229|GO:0008284|GO:0016477|GO:0030316|GO:0043234|GO:0043306|GO:0043325|GO:0048015	GRB2-associated-binding protein 2 isoform b	7.46558	28.7696	3.20426	4.36705	8.99314	8.4036	5	27.5007	28.7105	30.0977	3.81046	3.30638	2.49594	4.21796	4.46203	4.42114
ASHGA5P053372	0.0104394	0.0448412	2.98937	down	protein_coding	NM_001190956	CCDS55225.1	ADAM18	RefSeq	1462	chr8	+	39442086	39469094		GACTGTCATCATTCTGATGTTATGACATACTAGAACATTGCCTGTGTAGTTTTCTTGTAA	8749	Hs.127930	GO:0004222|GO:0006508|GO:0007275|GO:0007283|GO:0008237|GO:0008270|GO:0016020|GO:0016021|GO:0030154	putative ADAM18 gene product isoform 2 precursor	5.67192	31.1083	2.89732	4.47717	6.84857	5.16719	5	31.7922	36.2358	25.2969	3.45131	2.74472	2.49594	4.4488	4.83175	4.15095
ASHGA5P005502	0.00364753	0.0240778	2.37182	down	protein_coding	NM_000943	CCDS4133.1	PPIC	RefSeq	1241	chr5	-	122359077	122372425		TTTGGAAAAGTCATTGATGGGATGACAGTGGTGCACTCCATAGAGCTCCAAGCAACTGAT	5480	Hs.110364	GO:0003755|GO:0005737|GO:0006457|GO:0007165|GO:0016018|GO:0051082	peptidyl-prolyl cis-trans isomerase C precursor	5811.19	15390.7	12.4831	13.7291	4881.76	6087.3	6464.51	15885.7	16602.4	13683.9	12.3049	12.274	12.8703	13.7466	13.8302	13.6103
ASHGA5P006567	0.000331567	0.00700655	3.26813	down	protein_coding	NM_001142766	CCDS44403.1	PCDH15	RefSeq	7012	chr10	-	55580859	56561051	ENST00000395432, NM_001142763, NM_001142764, NM_001142765, NM_001142768, NM_001142773, NM_033056	ACAGCTCAATTCTTTTCCTTCTCTACCATTTTCAACAAAGCAGGGGAAATAACTCAGTCT	65217	Hs.280209	GO:0001750|GO:0005509|GO:0005576|GO:0005615|GO:0005886|GO:0007156|GO:0007605|GO:0016021|GO:0032420|GO:0045202|GO:0045494|GO:0050953|GO:0050957	protocadherin-15 isoform CD1-7 precursor	17.3374	96.4542	4.50807	6.21654	14.4481	25.6979	11.8661	107.844	85.6643	95.8546	4.44104	4.78106	4.30212	6.30489	6.15908	6.18565
ASHGA5P054228	0.0195977	0.0672125	2.48842	down	protein_coding	ENST00000382832	CCDS14793.1	CYorf15B	GENCODE	3315	chrY	+	21758441	21767698	NR_045128	CAGGATCTCCTCTAGGCATTGATTAAGATTAAGTGTGATCATTGTACTGATGGATATATT				Putative gamma-taxilin-like protein CYorf15B [Source:UniProtKB/Swiss-Prot;Acc:Q9BZA4]	6.34585	24.5794	2.79193	4.10716	5	9.03755	5	30.7514	22.3591	20.6277	2.46913	3.41073	2.49594	4.4007	4.07467	3.84611
ASHGA5P032393	5.38725e-05	0.00319434	2.12105	down	protein_coding	NM_033185	CCDS32643.1	KRTAP3-3	RefSeq	754	chr17	-	39149681	39150385		GGGAATTCTGTTTTCAGTCTTGGGTGGTATCTTTCTGAAAATTAAGGAAGTTCTTCATGA	85293	Hs.662759	GO:0005198|GO:0045095	keratin-associated protein 3-3	5	16.9773	2.45604	3.54082	5	5	5	17.3753	15.3946	18.1621	2.46913	2.40305	2.49594	3.48393	3.49199	3.64655
ASHGA5P050773	0.011841	0.0483257	2.79759	down	protein_coding	NM_006139	CCDS2361.1	CD28	RefSeq	4900	chr2	+	204571197	204603636		TACGACAATGCGGTCAACCTTAGCTGCAAGTATTCCTACAATCTCTTCTCAAGGGAGTTC	940	Hs.443123	GO:0002020|GO:0005070|GO:0005515|GO:0005829|GO:0005886|GO:0005886|GO:0005887|GO:0006959|GO:0007166|GO:0009897|GO:0015026|GO:0016032|GO:0031295|GO:0042089|GO:0042102|GO:0042102|GO:0042802|GO:0045066|GO:0045070|GO:0045086|GO:0045727|GO:0045840|GO:0050690	T-cell-specific surface glycoprotein CD28 isoform 1 precursor	5.16412	26.1454	2.72697	4.21115	5	5	5.49237	24.8252	30.4227	23.1883	2.46913	2.40305	3.30873	4.05829	4.55487	4.0203
ASHGA5P010524	0.00318658	0.0224965	3.09183	down	protein_coding	NM_133445	CCDS6758.1	GRIN3A	RefSeq	7771	chr9	-	104331633	104500862		TTCTGGAATACATGACCCCAAGTTACATCATCCTTCCCAAGGATTCCGCTTTGGAACTGT	116443	Hs.654783	GO:0004972|GO:0004972|GO:0005234|GO:0005262|GO:0005515|GO:0006816|GO:0014069|GO:0016020|GO:0016021|GO:0016358|GO:0016594|GO:0017146|GO:0030054|GO:0030288|GO:0042165|GO:0042802|GO:0043005|GO:0043025|GO:0045202|GO:0045211|GO:0045471|GO:0048511|GO:0051721|GO:0060134	glutamate [NMDA] receptor subunit 3A precursor	104.872	418.214	6.81327	8.44173	63.4096	167.959	83.2474	401.441	356.922	496.278	6.38997	7.17553	6.8743	8.31482	8.33386	8.67651
ASHGA5P008679	0.0090961	0.0412234	2.87395	down	protein_coding	NM_033338	CCDS7580.1	CASP7	RefSeq	2714	chr10	+	115439427	115490668	NM_033339	AGTGGGATTTGTGCTTCTTATGTTACCCAGATGGCAGATGATCAGGGCTGTATTGAAGAG	840	Hs.9216	GO:0001836|GO:0004190|GO:0004197|GO:0005515|GO:0005654|GO:0005737|GO:0005789|GO:0005829|GO:0006508|GO:0006915|GO:0006917|GO:0006921|GO:0007507|GO:0007568|GO:0008234|GO:0008635|GO:0009411|GO:0016485|GO:0031966|GO:0043525	caspase-7 isoform delta	15.6608	72.0204	4.25497	5.77801	10.5599	27.9539	8.4687	74.6473	69.7383	71.6757	4.02263	4.88843	3.85386	5.74693	5.83925	5.74783
ASHGA5P012465	5.8544e-05	0.00325267	5.09437	down	protein_coding	NM_001080487	CCDS45547.1	PABPN1L	RefSeq	1309	chr16	-	88929747	88933068		TTCTCTGGACACCCCAAGGGTTATGCCTACATAGAGTTTGCCACCAAGGGCTCCGTGCAG	390748	Hs.730522	GO:0000166|GO:0003723|GO:0005737	embryonic polyadenylate-binding protein 2	5	38.032	2.45604	4.80495	5	5	5	34.3088	40.7413	39.0459	2.46913	2.40305	2.49594	4.56931	5.01397	4.83155
ASHGA5P052081	0.00113507	0.0127888	2.47901	down	protein_coding	NM_032623	CCDS43269.1	MGARP	RefSeq	1339	chr4	-	140187316	140201492		ATCTGCCTGTCCAGGTCACGTGGAGGCTGCTCCGGAGACCACAGCAGTCAGTGCTGAAAC	84709	Hs.710036	GO:0005515|GO:0005739|GO:0006626|GO:0008089|GO:0008090|GO:0010822|GO:0019896|GO:0031307|GO:0071383|GO:0071456|GO:0097211	protein MGARP	113.58	376.201	6.96715	8.27692	99.6842	164.287	76.7684	395.813	301.44	431.349	6.99096	7.14645	6.76404	8.292	8.07697	8.46178
ASHGA5P048607	0.000365445	0.00737373	2.02304	down	protein_coding	NM_020154	CCDS10032.1	EMC7	RefSeq	1075	chr15	-	34376223	34394053		CAAAAGGAGGTAGTCAGGCCGTCCAGAGCTGGCATTTGCACAAACACGGCAACACTGGGT	56851	Hs.160565	GO:0004180|GO:0005737|GO:0008150|GO:0016021|GO:0016021|GO:0017076|GO:0030246|GO:0072546	chromosome 15 open reading frame 24 precursor	10555.8	23447.3	13.3365	14.3531	11509.9	11975.5	8181.96	24307.3	24564.2	21470.5	13.5002	13.2971	13.2124	14.3845	14.3845	14.2903
ASHGA5P010200	4.17556e-05	0.00291494	2.64593	down	protein_coding	ENST00000359971	CCDS6434.1	ZNF517	GENCODE	2335	chr8	+	146024260	146034529		GCCTCACTAGGCTTTCTTGTTGCCAAACCAGCACTGATCTCCCTATTGGAGCAAGGAGAG	340385	Hs.521942	GO:0006351|GO:0006355|GO:0005634|GO:0005622|GO:0003677|GO:0008270|GO:0003676	zinc finger protein 517 [Source:HGNC Symbol;Acc:27984]	181.393	613.979	7.62195	9.02572	154.142	226.97	163.067	628.588	553.573	659.777	7.56106	7.56054	7.74426	8.99213	8.98196	9.10309
ASHGA5P047767	0.0358734	0.100757	2.60021	down	protein_coding	NM_207426	CCDS7655.2	FOXI2	RefSeq	3178	chr10	+	129535537	129539450		TCAGCCAGATCTACCAGTACGTGGCTGGTAACTTCCCTTTCTACAAGCGCAGCAAGGCGG	399823	Hs.449674	GO:0003690|GO:0003705|GO:0005667|GO:0007389|GO:0008134|GO:0008301|GO:0009957|GO:0043049|GO:0043565|GO:0051090	forkhead box protein I2	8.50011	34.4851	3.27287	4.6515	6.04163	14.4587	5	36.3497	33.8312	33.2744	3.29799	4.02469	2.49594	4.65152	4.72072	4.58227
ASHGA5P043866	0.00686639	0.034563	5.7833	down	protein_coding	NM_012281	CCDS5776.1	KCND2	RefSeq	5333	chr7	+	119913721	120390387		ATTGCTCTACCTGTTCCGGTGATTGTATCCAACTTCAGTCGCATCTACCACCAGAATCAA	3751	Hs.654739	GO:0001508|GO:0005249|GO:0005515|GO:0005886|GO:0007268|GO:0008076|GO:0009986|GO:0043197|GO:0046872|GO:0051260	potassium voltage-gated channel subfamily D member 2 precursor	9.3121	77.231	3.35783	5.88972	6.45721	16.4791	5	77.274	76.8213	77.5978	3.38103	4.19651	2.49594	5.80905	5.99466	5.86546
ASHGA5P049840	1.46854e-05	0.00221669	3.44654	down	protein_coding	NM_001545	CCDS11711.1	ICT1	RefSeq	888	chr17	+	73008779	73017356		CATGAATCGGGAAAGGCTGAGACAAAAGAGAATTCATTCTGCTGTAAAGACAAGCAGGAG	3396	Hs.407955	GO:0004045|GO:0005739|GO:0005762|GO:0016150|GO:0070126	peptidyl-tRNA hydrolase ICT1, mitochondrial precursor	1563.83	6115.32	10.5813	12.3664	1444.84	2036.69	1209.95	6048.68	5779.69	6517.58	10.6059	10.6441	10.4939	12.2971	12.328	12.4742
ASHGA5P052901	0.0110892	0.0465021	2.22098	down	protein_coding	NM_138810	CCDS5263.1	TAGAP	RefSeq	1344	chr6	-	159459943	159466184		GAACAACAAGGTTTGTTCTGCTTACTGATGAGAAATCCCCAACTTATGATCTCACCATCT	117289	Hs.529984	GO:0005085|GO:0005829|GO:0007264|GO:0051056	T-cell activation Rho GTPase-activating protein isoform c	5.1078	20.5882	2.6814	3.83259	5.32341	5	5	24.6518	17.4119	19.7008	3.14519	2.40305	2.49594	4.04412	3.68117	3.77249
ASHGA5P012924	0.0188522	0.0655323	2.21853	down	protein_coding	NM_054014	CCDS13014.1	FKBP1A	RefSeq	901	chr20	-	1352355	1373816	NM_000801, NM_001199786, NR_037661	CCCCAGGAGACGGGCGCACCTTCCCCAAGCGCGGCCAGACCTGCGTGGTGCACTACACCG	2280	Hs.471933	GO:0000413|GO:0000413|GO:0003007|GO:0003755|GO:0003755|GO:0004871|GO:0005024|GO:0005160|GO:0005219|GO:0005515|GO:0005527|GO:0005528|GO:0005528|GO:0005829|GO:0005829|GO:0006457|GO:0006458|GO:0007179|GO:0007183|GO:0014802|GO:0018208|GO:0022417|GO:0030424|GO:0031398|GO:0032092|GO:0032513|GO:0032925|GO:0033017|GO:0034205|GO:0034713|GO:0042026|GO:0042110|GO:0043123|GO:0043206|GO:0046332|GO:0048185|GO:…	peptidyl-prolyl cis-trans isomerase FKBP1A isoform a	350.984	873.34	8.3707	9.52031	205.849	583.555	263.549	932.505	652.5	1035.02	7.92079	8.83157	8.35976	9.57614	9.2423	9.74249
ASHGA5P037492	0.00104578	0.0122357	2.08275	down	protein_coding	ENST00000398457	CCDS42937.1	ABCG1	GENCODE	3119	chr21	+	43619798	43717354	ENST00000347800, NM_004915, NM_016818, NM_207174, NM_207628	AATGGACATCTGAAAAAAGTAGATAATAACCTCACGGAAGCCCAGCGCTTCTCCTCCTTG	9619	Hs.124649	GO:0055085|GO:0044281|GO:0006355|GO:0006629|GO:0008203|GO:0006810|GO:0010033|GO:0042632|GO:0042157|GO:0033993|GO:0045542|GO:0010875|GO:0010887|GO:0033344|GO:0034374|GO:0042987|GO:0033700|GO:0043691|GO:0032367|GO:0034375|GO:0010745|GO:0055091|GO:0015914|GO:0010872|GO:0009720|GO:0034436|GO:0055099|GO:0005886|GO:0005622|GO:0005789|GO:0000139|GO:0016020|GO:0005794|GO:0005887|GO:0009897|GO:0055037|GO:…	ATP-binding cassette, sub-family G (WHITE), member 1 [Source:HGNC Symbol;Acc:73]	12.8974	49.8022	4.15379	5.21227	11.4347	17.0904	10.1673	47.1757	53.8299	48.4009	4.12627	4.24491	4.09017	5.05119	5.43563	5.15
ASHGA5P054730	0.0245309	0.0778775	2.82006	down	protein_coding	NM_001256686		CSNK2A1P	RefSeq	1416	chr11	-	11373488	11374904	NM_001895, NM_177559	AACCTGTCTGACATGTCGGGACCCGTGCCAAGCAGGGCCAGAGTTTACACAGATGTTAAT	283106	Hs.741126		casein kinase 2, alpha 1 polypeptide-like	136.095	488.793	7.12892	8.62464	119.75	217.862	70.6727	575.114	582.179	309.085	7.23674	7.50131	6.64871	8.85578	9.0679	7.95025
ASHGA5P012626	0.018605	0.0649628	2.19321	down	protein_coding	NM_030969	CCDS4515.1	TMEM14B	RefSeq	989	chr6	+	10747994	10757214	NM_001127711	CCTTCGGCAGATGCAGGCCTGGGGTAGTCTCCTTTCTGGACTGAGAAGAGAAGAATGGAG	81853	Hs.95600	GO:0016021	transmembrane protein 14B isoform a	1719.19	4011.72	10.6275	11.7606	1886.85	2372.04	898.67	4170.4	3769.07	4095.68	10.9741	10.8678	10.0408	11.7665	11.7205	11.7948
ASHGA5P008569	1.09981e-05	0.00216313	3.60656	down	protein_coding	NM_001080744	CCDS43182.1	DGKG	RefSeq	5743	chr3	-	185864989	186080023		AGACAAGGAGAAAGGTTGAACTTTTTCCGTGATACTCCAGACTTCCGTGTTTTGGCCTGT	1608	Hs.683449	GO:0004143|GO:0005509|GO:0005524|GO:0005737|GO:0005886|GO:0005886|GO:0007165|GO:0007205|GO:0007596|GO:0030168|GO:0035556	diacylglycerol kinase gamma isoform 2	5	27.6374	2.45604	4.30667	5	5	5	28.2157	28.1326	26.564	2.46913	2.40305	2.49594	4.25894	4.43043	4.23064
ASHGA5P044083	0.00466978	0.0274745	2.26426	down	protein_coding	NM_001118887	CCDS47762.1	ANGPT2	RefSeq	5267	chr8	-	6357174	6420784	NM_001147	AGAAATAGGGACAAACCTGTTGAACCAAACAGCGGAGCAAACGCGGAAGTTAACTGATGT	285	Hs.583870	GO:0001525|GO:0001666|GO:0005102|GO:0005515|GO:0005576|GO:0005615|GO:0005634|GO:0005886|GO:0007165|GO:0007281|GO:0007596|GO:0009314|GO:0009612|GO:0009749|GO:0010812|GO:0014070|GO:0014823|GO:0016525|GO:0030971|GO:0031100|GO:0042995|GO:0043537|GO:0045766|GO:0046872|GO:0048014|GO:0050900|GO:0050928|GO:0060135|GO:0072012	angiopoietin-2 isoform b precursor	2458.62	6168.01	11.1889	12.368	2066.25	3534.38	1775.23	7142.01	6513.3	4848.71	11.0881	11.4414	11.0372	12.5515	12.5096	12.0428
ASHGA5P003099	0.0468836	0.120413	2.05906	down	protein_coding	NM_017755	CCDS3869.1	NSUN2	RefSeq	3389	chr5	-	6599351	6633473	NM_001193455	ACATGCCGACATGAATGTCCCCTTTCCAGAGGGATTTGTTATTGCGAATGATGTGGACAA	54888	Hs.481526	GO:0000049|GO:0005634|GO:0005730|GO:0005737|GO:0005819|GO:0007067|GO:0016428|GO:0030488|GO:0051301	tRNA (cytosine(34)-C(5))-methyltransferase isoform 1	19.7785	65.9109	4.59405	5.63603	21.6961	29.0895	8.55011	69.7047	58.5023	69.5257	4.97817	4.9389	3.86508	5.64512	5.5612	5.70177
ASHGA5P053974	0.0365435	0.101972	2.36471	down	protein_coding	NM_006579	CCDS14300.1	EBP	RefSeq	1191	chrX	+	48380163	48387104		TCATGCCCAGAGCACGCTGGATGCCAAGGCCACAAAAGCCAAGAGCAAGAAGAACTGAGG	10682	Hs.30619	GO:0000247|GO:0001501|GO:0004769|GO:0004888|GO:0005783|GO:0005789|GO:0005887|GO:0006695|GO:0006695|GO:0006855|GO:0008203|GO:0015238|GO:0030097|GO:0044281|GO:0047750	3-beta-hydroxysteroid-Delta(8), Delta(7)-isomerase	1467.25	3827.31	10.3795	11.6211	1102.82	2405.53	893.396	3552.82	2516.96	5412.14	10.2153	10.8895	10.0336	11.5348	11.1397	12.1888
ASHGA5P015735	0.0371575	0.102972	2.13122	down	protein_coding	NM_014705	CCDS47688.1	DOCK4	RefSeq	8343	chr7	-	111366163	111846462		AGGATGTCACTGGGGAGTTTGTTGCTTGTCTCCTGTCCCTATTACGACAAATGACAGATA	9732	Hs.654652	GO:0005085|GO:0005515|GO:0005525|GO:0005829|GO:0012505|GO:0016020|GO:0017124|GO:0030165|GO:0030675|GO:0030971|GO:0032420|GO:0032421|GO:0032855|GO:0048365|GO:0060326	dedicator of cytokinesis protein 4	346.255	958.499	8.49199	9.58367	333.921	384.951	319.892	716.87	685.198	1473.43	8.56685	8.27856	8.63055	9.18806	9.30621	10.2567
ASHGA5P039032	0.0349069	0.0989	2.33545	down	protein_coding	NM_016369	CCDS3095.1	CLDN18	RefSeq	3359	chr3	+	137729005	137752494		TGAGGCAGAGTTCAGGCTTCACCGAATGCAGGCCCTATTTCACCATCCTGGGACTTCCAG	51208	Hs.655324	GO:0005198|GO:0005923|GO:0016021|GO:0016338|GO:0034329|GO:0042802|GO:0045216|GO:0070830	claudin-18 isoform 1 precursor	16.1013	64.2644	4.3619	5.5856	7.91332	22.3088	18.0816	79.0006	54.9496	58.8429	3.64215	4.58707	4.85648	5.84225	5.46551	5.44904
ASHGA5P030584	0.0116718	0.0478336	2.62965	down	protein_coding	NM_001005185	CCDS30905.1	OR6N1	RefSeq	939	chr1	-	158735533	158736472		TTCTATGGGAGCATCCTTTCCATGTATGTGCAGCTGAAGAAGAGCTACTCACTGGACTAT	128372	Hs.553592	GO:0004930|GO:0004984|GO:0005886|GO:0016021	olfactory receptor 6N1	6.10102	29.5337	2.99131	4.38618	5	7.96965	5.33341	29.8165	22.6387	36.146	2.46913	3.23302	3.27178	4.35089	4.09497	4.71267
ASHGA5P005043	0.00243004	0.0192285	2.12502	down	protein_coding	NM_203305	CCDS6888.1	FAM102A	RefSeq	3643	chr9	-	130702860	130712993	NM_001035254	TTGCCACCAGGGTCTCTTCTGGGGTCTACGAGCCAGTTGTGATTGAAAGCCATTGAGGAG	399665	Hs.535972		protein FAM102A isoform b	12.5483	50.1179	4.13008	5.21756	13.2458	14.7618	9.63739	44.8117	48.187	57.3551	4.31992	4.05139	4.01893	4.97466	5.26858	5.40944
ASHGA5P050155	0.000936107	0.0116377	2.08948	down	protein_coding	NM_001806	CCDS12432.1	CEBPG	RefSeq	3784	chr19	+	33864574	33873592	NM_001252296	AGGACAGTAGACCTCACCCTTTCCAGACTTTAGAGCTTGTGGCTTGAATGTTAAAGGTGT	1054	Hs.429666	GO:0001889|GO:0003677|GO:0003690|GO:0003700|GO:0005515|GO:0005634|GO:0005634|GO:0005730|GO:0006351|GO:0006357|GO:0006955|GO:0008134|GO:0016071|GO:0030183|GO:0042267|GO:0042803|GO:0043353|GO:0043388|GO:0043433|GO:0043565|GO:0045078|GO:0045739|GO:0046982|GO:0051091	CCAAT/enhancer-binding protein gamma	5135.12	12168.2	12.3066	13.3697	5342.64	5426	4636.72	13098.9	12493.4	10912.3	12.4463	12.0914	12.382	13.4393	13.4042	13.2656
ASHGA5P007460	0.00187704	0.016613	2.39409	down	protein_coding	ENST00000333175	CCDS12052.1	C19orf6	GENCODE	2608	chr19	-	1009649	1021141		AGCGGCATTGGCTGCGCATTCCATGATCTACTTCTTCCACCACTACGAGCTGCCTGCCAT	91304	Hs.515003	GO:0016021|GO:0005737	chromosome 19 open reading frame 6 [Source:HGNC Symbol;Acc:17039]	46.6768	169.625	5.82217	7.08164	32.8962	65.9309	41.2032	167.627	174.774	166.474	5.52715	5.99226	5.94709	6.98135	7.25863	7.00495
ASHGA5P005456	0.000556746	0.00904608	2.16413	down	protein_coding	NM_001160301	CCDS53346.1	DPYD	RefSeq	1789	chr1	-	98185313	98386615		GCAATTTGCTACTGAGACTTTGATCCTGGCTTTCTCTTTAATGAATCATTTGTAAAGACT	1806	Hs.335034	GO:0004158|GO:0005737|GO:0005829|GO:0005829|GO:0006145|GO:0006206|GO:0006208|GO:0006208|GO:0006210|GO:0006212|GO:0006214|GO:0006222|GO:0017113|GO:0017113|GO:0017113|GO:0017113|GO:0019483|GO:0042803|GO:0042803|GO:0044281|GO:0046135|GO:0046872|GO:0050660|GO:0050661|GO:0051539|GO:0055086	dihydropyrimidine dehydrogenase [NADP(+)] isoform 2	42.031	144.967	5.7244	6.83818	35.1588	52.7406	38.1936	154.424	146.66	133.817	5.61456	5.70532	5.85331	6.8582	6.97721	6.67913
ASHGA5P013709	0.0370679	0.102818	2.37548	down	protein_coding	NM_178498	CCDS7860.2	SLC5A12	RefSeq	6253	chr11	-	26688565	26743574		TCAGTAAAGGCTTATGTCTCTTATTTGGCGTGATGTGTACCTCTATGGCTGTGGCTGCAT	159963	Hs.148907	GO:0006814|GO:0015293|GO:0016021|GO:0016324	sodium-coupled monocarboxylate transporter 2	13.0646	56.9995	4.16576	5.41399	16.6578	8.76167	13.7743	58.6583	50.6474	61.6928	4.63282	3.36471	4.49976	5.38141	5.34394	5.51661
ASHGA5P007115	0.000660941	0.00974945	2.08822	down	protein_coding	NM_178339	CCDS43065.1	C3orf35	RefSeq	1558	chr3	+	37440967	37476988		AACATCTTTCCCCTGGACCTTTGGACCCAAGGTAAGAAAACTGAAGTTCAGAAAAGGGAG	339883	Hs.475945	GO:0016021	AP20 region protein 1 isoform B	59.7881	188.947	6.18213	7.2444	58.6242	72.5809	48.159	183.479	196.674	186.687	6.28334	6.11432	6.14872	7.11807	7.43744	7.17771
ASHGA5P042714	0.0143767	0.0549786	2.19323	down	protein_coding	NM_002377	CCDS5272.1	MAS1	RefSeq	1135	chr6	+	160327973	160329107		CTTAAGTATCTCCTAAATGTGATACAGAAGAACATCTCATCCCATATGCATGAGATACTA	4142	Hs.99900	GO:0001595|GO:0001933|GO:0004930|GO:0004945|GO:0005886|GO:0005887|GO:0007186|GO:0007250|GO:0007283|GO:0008283|GO:0008284|GO:0008584|GO:0009653|GO:0009986|GO:0014823|GO:0017046|GO:0021766|GO:0034698|GO:0038166|GO:0042277|GO:0042493|GO:0045740|GO:0050727|GO:0060732|GO:0070528|GO:0071375	proto-oncogene Mas	8.93913	36.1864	3.59312	4.72617	5.81251	14.7192	6.28573	33.488	40.1725	34.8986	3.25369	4.04869	3.47696	4.53109	4.99118	4.65624
ASHGA5P004826	0.00131108	0.0138817	2.12489	down	protein_coding	NM_152632	CCDS14237.2	CXorf22	RefSeq	3667	chrX	+	35937850	36008269		GTAATTGTTGGGCCTTCTGTCCTTAACTTTGGTAATATTTGTGTGAACTCTCCAAATACT	170063	Hs.563676		uncharacterized protein CXorf22	31.8809	111.39	5.34711	6.4345	25.5925	43.5588	26.4913	121.564	114.355	98.2508	5.20145	5.46784	5.37205	6.48445	6.59679	6.22227
ASHGA5P051033	0.00205342	0.0174514	2.17351	down	protein_coding	NM_001719	CCDS13455.1	BMP7	RefSeq	4049	chr20	-	55743808	55841707		GCCATCTCCGTCCTCTACTTCGATGACAGCTCCAACGTCATCCTGAAGAAATACAGAAAC	655	Hs.473163	GO:0001501|GO:0001503|GO:0001656|GO:0001657|GO:0001823|GO:0001837|GO:0005125|GO:0005515|GO:0005515|GO:0005615|GO:0008083|GO:0010664|GO:0010800|GO:0010862|GO:0010862|GO:0016358|GO:0030501|GO:0030509|GO:0032088|GO:0034116|GO:0034504|GO:0040007|GO:0042326|GO:0042347|GO:0043401|GO:0043407|GO:0045665|GO:0045669|GO:0045786|GO:0045839|GO:0045892|GO:0045893|GO:0048762|GO:0048812|GO:0051216|GO:0060389|GO:…	bone morphogenetic protein 7 precursor	189.508	515.516	7.64725	8.76728	130.719	263.077	174.728	510.022	483.264	553.264	7.34995	7.76588	7.82593	8.67858	8.7788	8.84447
ASHGA5P003262	0.0252602	0.0794229	2.50329	down	protein_coding	NM_002736	CCDS5740.1	PRKAR2B	RefSeq	3678	chr7	+	106685177	106802256		GGACTGTCAAATGTTTAGCAATGGATGTGCAAGCATTTGAAAGGCTTCTGGGACCTTGCA	5577	Hs.433068	GO:0000086|GO:0000278|GO:0005737|GO:0005743|GO:0005813|GO:0005829|GO:0005886|GO:0005952|GO:0006112|GO:0006631|GO:0006833|GO:0007165|GO:0007173|GO:0007202|GO:0007596|GO:0007612|GO:0008543|GO:0008603|GO:0019904|GO:0030552|GO:0031625|GO:0034199|GO:0035556|GO:0044281|GO:0045121|GO:0048011|GO:0048471|GO:0050796|GO:0055085|GO:0071377	cAMP-dependent protein kinase type II-beta regulatory subunit	1562.32	4482.09	10.5222	11.846	984.856	2278.98	1423.11	5521.93	5056.58	2867.77	10.0483	10.8061	10.7122	12.1542	12.1293	11.2546
ASHGA5P047373	0.0371385	0.102945	2.32227	down	protein_coding	NM_014753	CCDS7199.1	BMS1	RefSeq	8048	chr10	+	43277953	43330385		TGCTTCGTGACTGGAAAGTGGGAAGATGATAAAGATGCAGCCAAGGTCTTAGCAGAAGAT	9790	Hs.10848	GO:0003924|GO:0005524|GO:0005525|GO:0005634|GO:0005730|GO:0005730|GO:0042255	ribosome biogenesis protein BMS1 homolog	140.573	405.856	7.14968	8.36522	115.492	236.081	70.1467	476.231	457.586	283.752	7.19088	7.61869	6.63948	8.58018	8.69747	7.81802
ASHGA5P011436	0.0234916	0.0755548	4.11749	down	protein_coding	NM_033067	CCDS581.1	DMRTB1	RefSeq	1907	chr1	+	53925071	53933158		TCATCTTTCTCACTGACCGTCCTGTTTGATACTGACAAGGAGAACACTGATGACCAGGAT	63948	Hs.131654	GO:0005634|GO:0006351|GO:0006355|GO:0007548|GO:0043565|GO:0046872	doublesex- and mab-3-related transcription factor B1	5.0327	41.1587	2.66669	4.70846	5.09811	5	5	71.8675	30.6482	20.9603	3.10108	2.40305	2.49594	5.68772	4.5673	3.87035
ASHGA5P045721	3.66513e-05	0.0028109	2.08249	down	protein_coding	NM_001085452	CCDS43808.1	FAM75A1	RefSeq	4223	chr9	+	39884974	39891207	ENST00000356699, ENST00000377621, NM_001113541, NM_001145196	TAGCCTTCCCTGGAGAAAAAGAAGTCCCCAAGAAAAAATTCACTCTATGTAGAGAAAAAA	647060	Hs.632654	GO:0016021	protein FAM75A1	31.872	109.938	5.357	6.41531	28.3951	41.5318	25.6892	120.125	104.813	104.877	5.33628	5.4037	5.33103	6.4659	6.45938	6.32065
ASHGA5P011700	0.00451423	0.026874	2.24535	down	protein_coding	NM_032562	CCDS7319.1	PLA2G12B	RefSeq	1092	chr10	-	74694937	74714510		TATTTCCTGGGTCTCAAGGTACCAGAAAGTATGGACTTGGGCATTCCAGCAATGACAAAG	84647	Hs.333175	GO:0004623|GO:0005509|GO:0005576|GO:0016042	group XIIB secretory phospholipase A2-like protein precursor	5.53351	20.2848	2.65594	3.82288	5	6.60053	5	18.855	20.8687	21.1308	2.46913	3.00275	2.49594	3.6197	3.96797	3.88097
ASHGA5P040760	0.0129574	0.051392	2.56388	down	protein_coding	ENST00000377976	CCDS34263.1	GRXCR2	GENCODE	747	chr5	-	145239295	145252531		ACAGTTTTCTGCAAGAGTCTCTTGAAACAATGGATGGTGTTTATGGGTCTGGGGAAGTCC	643226	Hs.570895		glutaredoxin, cysteine rich 2 [Source:HGNC Symbol;Acc:33862]	6.34372	25.0828	2.79183	4.15016	5	9.03115	5	28.6537	23.1937	23.4009	2.46913	3.41041	2.49594	4.28658	4.13251	4.03138
ASHGA5P032792	7.60434e-06	0.00191081	3.71248	down	protein_coding	NM_153230	CCDS11082.1	FBXO39	RefSeq	1673	chr17	+	6679551	6690965		TCTGAGAAGCTGCTATTTCAGTGACCCAGACTGTTCAATGAGACCCACTCTGATAGATCT	162517	Hs.368364		F-box only protein 39	5	28.4196	2.45604	4.34842	5	5	5	27.9069	26.9521	30.3999	2.46913	2.40305	2.49594	4.24174	4.36545	4.43808
ASHGA5P049314	0.00187701	0.016613	2.04037	down	protein_coding	ENST00000219313	CCDS10910.1	PSMD7	GENCODE	1670	chr16	+	74330672	74340186		CTCATCAACAACAAGATTGCCAACCGGGATGCAGAGAAGAAAGAAGGGCAGGAGAAAGAA	5713	Hs.440604	GO:0006915|GO:0042981|GO:0044281|GO:0000209|GO:0002474|GO:0000278|GO:0016032|GO:0000075|GO:0000084|GO:0000216|GO:0002479|GO:0006521|GO:0006977|GO:0010467|GO:0016070|GO:0016071|GO:0031145|GO:0034641|GO:0042590|GO:0051437|GO:0051439|GO:0000082|GO:0051436|GO:0005829|GO:0005654|GO:0000502|GO:0005838|GO:0005515	proteasome (prosome, macropain) 26S subunit, non-ATPase, 7 [Source:HGNC Symbol;Acc:9565]	15020.1	34970.5	13.8739	14.9027	14585.2	18766.8	11708.5	35622.7	30026	39262.8	13.8699	14.0133	13.7384	14.9212	14.6922	15.0947
ASHGA5P011988	0.00888463	0.0406171	2.59732	down	protein_coding	NM_174912	CCDS14375.1	FAAH2	RefSeq	2039	chrX	+	57313109	57515629		AACAACCCATATGATTTACAGCATATTGTAGGTGGAAGTTCTGGTGGTGAGGGCTGCACA	158584	Hs.496205	GO:0016021|GO:0016787|GO:0016884	fatty-acid amide hydrolase 2	6.18703	24.9885	2.76533	4.14235	5	8.5611	5	25.9703	22.0171	26.978	2.46913	3.33092	2.49594	4.12655	4.04802	4.25249
ASHGA5P052042	0.0232662	0.0751543	2.53967	down	protein_coding	NM_024590	CCDS43264.1	ARSJ	RefSeq	4689	chr4	-	114821439	114900878		GCAGTCTCAGGTTCAACTTGCCATTCAGGTGTTACTTGTGGATAAGCACAAATATTTCCT	79642	Hs.22895	GO:0004065|GO:0005576|GO:0005788|GO:0006644|GO:0006665|GO:0006687|GO:0043687|GO:0044267|GO:0044281|GO:0046872	arylsulfatase J precursor	1121.93	3124.44	10.0222	11.3668	614.453	1642.8	1108.54	3670.57	3296.16	2406.58	9.38168	10.3173	10.3675	11.5822	11.5442	10.9741
ASHGA5P005916	0.00357801	0.0237794	2.0278	down	protein_coding	NM_020787	CCDS11180.1	ZNF624	RefSeq	4250	chr17	-	16524047	16557167		AAATTTCAAGAATTCCCTATCCTGACATGGAGCCCAAACCTGCAACCAAGAAGGCTACAC	57547	Hs.128078	GO:0003677|GO:0005634|GO:0006351|GO:0006355|GO:0008270	zinc finger protein 624	13.5234	50.8283	4.2206	5.24052	14.9255	16.0234	9.62135	57.7671	49.4091	45.3085	4.4843	4.161	4.01651	5.35704	5.3062	5.05833
ASHGA5P001812	0.0112186	0.0468107	2.03601	down	protein_coding	NM_015585	CCDS33447.1	C20orf26	RefSeq	4120	chr20	+	20033157	20341346		CCAGTGCTCTATGTTCTTCAGCTTCTGTGAGAAGAATGTGGATTATGAAACGTTTAAAGC	26074	Hs.729168		uncharacterized protein C20orf26 isoform 1	5.32837	18.2594	2.61972	3.64547	5	5.98511	5	19.7614	20.4843	14.5324	2.46913	2.8941	2.49594	3.69304	3.93922	3.30416
ASHGA5P034994	0.000592546	0.00934617	2.22614	down	protein_coding	NM_001103170	CCDS41253.1	AADACL3	RefSeq	4049	chr1	+	12776117	12788726		TTTTTCTGTTTCATGCAAGATCTGCCTCCGCTAAAGTATGATCCCGATGTTGTGGTCACG	126767	Hs.464705	GO:0016787	arylacetamide deacetylase-like 3 isoform 1	96.391	299.416	6.79181	7.94635	73.8032	124.741	90.6294	303.462	285.854	308.932	6.596	6.7939	6.98553	7.8889	8.00124	7.94892
ASHGA5P045478	0.00140295	0.0142941	3.70182	down	protein_coding	NM_012098	CCDS6868.1	ANGPTL2	RefSeq	3572	chr9	-	129849627	129885044		TATTCACAAAGAATAACCACCATTTTGCAAGGACCATGAGGCCACTGTGCGTGACATGCT	23452	Hs.653262	GO:0005102|GO:0005615|GO:0007165|GO:0007275	angiopoietin-related protein 2 precursor	5.92538	33.5129	2.7214	4.60964	5	7.77614	5	34.7612	32.2416	33.5359	2.46913	3.19914	2.49594	4.58874	4.64511	4.59506
ASHGA5P051518	0.00246289	0.0194103	2.03724	down	protein_coding	NM_001640	CCDS2801.1	APEH	RefSeq	2775	chr3	+	49711434	49720934		ATGAATGCTGTGCTCTGGCTACGCACACACTTGGGCAGCTGAAGCCCTGCCATTCTGCAT	327	Hs.517969	GO:0004252|GO:0005737|GO:0006508|GO:0031965	acylamino-acid-releasing enzyme	2125.54	4952.96	11.0268	12.0534	2042.5	2603.48	1730.63	4556.44	4347.68	5954.77	11.0774	11.0006	11.0025	11.8819	11.9278	12.3506
ASHGA5P042123	0.00653715	0.0335137	2.26509	down	protein_coding	ENST00000423932	CCDS1185.1	OR10J1	GENCODE	1089	chr1	+	159409511	159410600		CAACATCCACACTAGGCAGGAATATGAGGTGTAAACTCACAAACACTTGGCTCCTAGAGA	26476	Hs.532661	GO:0007186|GO:0007338|GO:0007606|GO:0016021|GO:0005886|GO:0005887|GO:0004930|GO:0004984	olfactory receptor, family 10, subfamily J, member 1 [Source:HGNC Symbol;Acc:8175]	5	18.2524	2.45604	3.63561	5	5	5	21.489	19.8637	13.4044	2.46913	2.40305	2.49594	3.82943	3.89111	3.1863
ASHGA5P011357	0.00710524	0.035144	2.35677	down	protein_coding	NM_004768	CCDS647.1	SRSF11	RefSeq	2811	chr1	+	70671364	70717701	NM_001190987	TCTAGAAGTGCAAGCAGAGAGAGACGACGACGAAGAAGCAGGAGTGGCACAAGATCTCCT	9295	Hs.479693	GO:0000166|GO:0000398|GO:0003723|GO:0005515|GO:0005634|GO:0005654|GO:0005730|GO:0006366|GO:0006369|GO:0006397|GO:0006406|GO:0008380|GO:0010467|GO:0031124	serine/arginine-rich splicing factor 11 isoform 1	1784.41	4589.82	10.6986	11.9354	1453.07	2784.13	1116.01	5396.02	4509.33	3864.1	10.6148	11.0994	10.3815	12.1221	11.9759	11.7081
ASHGA5P001146	0.000377088	0.00750421	2.00124	down	protein_coding	NM_001436	CCDS12545.1	FBL	RefSeq	1171	chr19	-	40325092	40337054		ATATGAAAGAGACCATGCCGTGGTCGTGGGAGTGTACAGGCCACCCCCCAAGGTGAAGAA	2091	Hs.299002	GO:0001652|GO:0003723|GO:0005515|GO:0005730|GO:0006364|GO:0008033|GO:0008168|GO:0015030|GO:0016074|GO:0031428	rRNA 2'-O-methyltransferase fibrillarin	14571.9	33640.6	13.8466	14.8475	15005.8	15547.1	13162.7	32161.3	33133.2	35627.4	13.921	13.709	13.9097	14.7762	14.8029	14.9633
ASHGA5P004873	0.00177121	0.0160217	2.3331	down	protein_coding	NM_197948	CCDS41754.1	CLEC7A	RefSeq	2503	chr12	-	10269375	10282868	NM_197949	AAATGAATTGATTTCAGATCAGAACCACAGCTACCCAAGAAAACCCATCTCCAAATTGTG	64581	Hs.143929	GO:0001846|GO:0001872|GO:0001874|GO:0001879|GO:0002238|GO:0002752|GO:0005737|GO:0006910|GO:0006911|GO:0006954|GO:0008037|GO:0008329|GO:0009756|GO:0009897|GO:0016021|GO:0016337|GO:0030246|GO:0032760|GO:0042110|GO:0042287|GO:0042832|GO:0045087|GO:0046872|GO:0050766	C-type lectin domain family 7 member A isoform c	16.8671	68.9959	4.49251	5.71476	12.2292	23.2812	15.0911	66.2988	71.5618	69.127	4.21906	4.6465	4.61195	5.56669	5.8828	5.69479
ASHGA5P027673	8.12044e-07	0.00125011	2.93735	down	protein_coding	NM_032656	CCDS9261.1	DHX37	RefSeq	4568	chr12	-	125431369	125473667		ATGAGACTCTTTTATACCACTTCCAAGCTAGGCACTGGGAACCGCATGTATCACACCAAA	57647	Hs.107382	GO:0003676|GO:0005524|GO:0008026	probable ATP-dependent RNA helicase DHX37	5	22.8803	2.45604	4.01056	5	5	5	24.4623	21.2287	22.9498	2.46913	2.40305	2.49594	4.0325	3.99474	4.00443
ASHGA5P010405	0.000136899	0.00476011	2.38073	down	protein_coding	ENST00000378714	CCDS7095.1	MCM10	GENCODE	4547	chr10	+	13203553	13253104	NM_182751	AATGCTAAAGGAAAAGACTGGTCCAAAGATAGGAGGAGAAACTCTGTTACCAAGAGGAGA	55388	Hs.198363	GO:0000278|GO:0000075|GO:0000216|GO:0006260|GO:0000082|GO:0005634|GO:0005737|GO:0005730|GO:0005654|GO:0005515|GO:0046872	minichromosome maintenance complex component 10 [Source:HGNC Symbol;Acc:18043]	439.429	1217.25	8.76587	10.0173	354.853	619.38	344.054	1304.42	1170.22	1177.11	8.6568	8.91067	8.73015	10.0615	10.0605	9.92984
ASHGA5P003337	0.000489768	0.00852732	2.11147	down	protein_coding	NM_005810	CCDS8599.1	KLRG1	RefSeq	1815	chr12	+	9142220	9163340		AAGCCCAGAATGACTATGGACCACAGCAAAAATCTTCCTCTTCCAGGCCTTCTTGTTCTT	10219	Hs.558446	GO:0004872|GO:0005886|GO:0006954|GO:0006968|GO:0007166|GO:0016021|GO:0030246|GO:0045087|GO:0050776	killer cell lectin-like receptor subfamily G member 1	775.378	1869.11	9.54875	10.627	624.529	1021.84	679.764	1922.23	1600.16	2084.95	9.40321	9.60995	9.63311	10.612	10.5069	10.7622
ASHGA5P026484	0.0416578	0.111153	2.06172	down	protein_coding	NM_006054	CCDS8049.1	RTN3	RefSeq	2588	chr11	+	63448921	63527363	NM_001265589, NM_001265590, NM_001265591, NM_201428, NM_201429, NM_201430, NR_049750, NR_049751	TGAAAGGGGAAAGATTGGAGGTAAGAGAGAAAATGAAAGAACACCTCTGGGTCCTTCTGT	10313	Hs.731428	GO:0000139|GO:0005615|GO:0005783|GO:0005789|GO:0006915|GO:0006950|GO:0016021|GO:0016192|GO:0019048|GO:0071786	reticulon-3 isoform a	2025	4652.78	10.88	11.9238	1597.97	3142.9	1334.14	4318.17	3137.97	6502.21	10.7466	11.2769	10.6164	11.8165	11.4848	12.4701
ASHGA5P043929	0.00330198	0.0229064	2.7574	down	protein_coding	NM_001185156	CCDS53465.1	IL24	RefSeq	1979	chr1	+	207070787	207077484	NM_006850	ACTCTGAAGTCATTCTCTACTCTGGCCAACAACTTTGTTCTCATCGTGTCACAACTGCAA	11009	Hs.58831	GO:0005125|GO:0005615|GO:0006915	interleukin-24 isoform 3 precursor	10.6979	56.4078	3.94153	5.40484	10.6944	10.1113	11.2878	53.0022	61.291	54.9303	4.04139	3.55761	4.2256	5.22892	5.63824	5.34736
ASHGA5P009397	0.00302752	0.0217883	2.41457	down	protein_coding	NM_002525	CCDS559.1	NRD1	RefSeq	4040	chr1	-	52254865	52344609	NM_001242361	ACAAGAAATCTTTATGGGGTAGTTGGAGCTGAAAGCAGGTCTGCACCTGTTCAGCATTTG	4898	Hs.584782	GO:0004222|GO:0005515|GO:0005829|GO:0006508|GO:0007528|GO:0008270|GO:0008283|GO:0009986|GO:0016477|GO:0048408|GO:0051044|GO:0052548	nardilysin isoform a precursor	757.489	2116.32	9.51932	10.7911	691.126	976.551	604.79	2317.81	2386.01	1645.16	9.54519	9.54654	9.46622	10.891	11.07	10.4123
ASHGA5P031730	0.0095033	0.0423698	4.19334	down	protein_coding	NM_133443	CCDS10725.1	GPT2	RefSeq	3963	chr16	+	46918307	46965201		GGGCCGCAGCCAGAGCAGCGCGGCCGCCGAGGCCTCGGCGGTGCTCAAGGTGCGGCCCGA	84706	Hs.460693	GO:0004021|GO:0004021|GO:0005759|GO:0006103|GO:0008652|GO:0030170|GO:0034641|GO:0042851|GO:0042853|GO:0044281	alanine aminotransferase 2 isoform 1	16.5551	114.376	4.38984	6.45794	7.91374	23.3943	18.3572	87.7767	123.221	132.13	3.64232	4.65217	4.87503	6.00255	6.71337	6.6579
ASHGA5P003972	0.000821275	0.0108949	2.18878	down	protein_coding	NM_001714	CCDS8726.1	BICD1	RefSeq	3589	chr12	+	32260184	32531141		AACATTCGGGTCAGCAGTGGCACTCAGAGGAAAAGACAATTTTCACCTTCCCTTTGTGAT	636	Hs.505202	GO:0005200|GO:0005515|GO:0005794|GO:0005802|GO:0005829|GO:0005856|GO:0005881|GO:0006396|GO:0008093|GO:0008298|GO:0009653|GO:0016020|GO:0016032|GO:0017137|GO:0019048|GO:0031410|GO:0031871|GO:0033365|GO:0034063|GO:0034452|GO:0045298|GO:0045502|GO:0048260|GO:0048471|GO:0072385|GO:0072393|GO:0072517|GO:1900275|GO:1900276|GO:1900737	protein bicaudal D homolog 1 isoform 1	119.894	355.475	7.06396	8.19409	106.781	162.83	90.0707	353.624	292.086	420.714	7.08397	7.13365	6.97426	8.12947	8.03441	8.41838
ASHGA5P021741	0.0215295	0.0714894	2.09504	down	protein_coding	NM_001166395	CCDS10902.1	CHST4	RefSeq	2197	chr16	+	71560153	71572493		TCTCAAAAGCAGCAGGGAAGCCCAAGCCACAAGGTCTTCCACTTCAGCACAATGCTACTG	10164	Hs.251383	GO:0001517|GO:0005802|GO:0005975|GO:0006044|GO:0006477|GO:0006790|GO:0006928|GO:0006954|GO:0006955|GO:0007155|GO:0007267|GO:0008146|GO:0016021|GO:0031228|GO:0050901	carbohydrate sulfotransferase 4	12.192	47.1182	4.0579	5.12488	7.60195	14.5319	14.442	54.9905	41.2291	45.1351	3.58632	4.03298	4.55441	5.2871	5.03452	5.05303
ASHGA5P002755	0.0175263	0.062396	3.33601	down	protein_coding	ENST00000423118	CCDS45385.1	PKD1	GENCODE	14135	chr16	-	2138710	2185899	ENST00000262304	TCCTGCTTTTGGTCAAGGCTGCCCAGCAGCTACGCTTCGTGCGCCAGTGGTCCGTCTTTG	5310	Hs.75813	GO:0007507|GO:0007218|GO:0007156|GO:0006611|GO:0043588|GO:0007160|GO:0048565|GO:0045944|GO:0006816|GO:0001701|GO:0001502|GO:0007050|GO:0032092|GO:0001892|GO:0018105|GO:0051216|GO:0001822|GO:0007259|GO:0050982|GO:0060674|GO:0072164|GO:0048754|GO:0021510|GO:0072205|GO:0060428|GO:0021915|GO:0042994|GO:0009653|GO:0031659|GO:0072177|GO:0007161|GO:0072218|GO:0048806|GO:0072287|GO:0072237|GO:0016021|GO:…	polycystic kidney disease 1 (autosomal dominant) [Source:HGNC Symbol;Acc:9008]	7.34492	34.4733	2.91677	4.6549	5	12.0348	5	32.8889	36.4892	34.0417	2.46913	3.78524	2.49594	4.50283	4.84209	4.61977
ASHGA5P014927	0.000425919	0.00787979	2.0059	down	protein_coding	NM_012062	CCDS8729.1	DNM1L	RefSeq	4612	chr12	+	32832136	32898584		GCTGCTTCTGCTGAGGCTGATGGCAAGTTAATTCAGGACAGCAGAAGAGAAACTAAAAAT	10059	Hs.556296	GO:0003374|GO:0003924|GO:0005515|GO:0005525|GO:0005737|GO:0005741|GO:0005741|GO:0005777|GO:0005794|GO:0005829|GO:0005874|GO:0006915|GO:0006921|GO:0010821|GO:0012505|GO:0016559|GO:0016559|GO:0031625|GO:0042802|GO:0043234|GO:0043653|GO:0048471|GO:0050714|GO:0051289|GO:0070584|GO:0090141|GO:0090149|GO:0090200|GO:1900063|GO:2001244	dynamin-1-like protein isoform 1	316.88	757.397	8.32968	9.33393	272.93	440.137	237.574	855.853	686.374	729.963	8.30696	8.46042	8.22165	9.45186	9.30895	9.24098
ASHGA5P003829	0.00297069	0.0215425	2.82415	down	protein_coding	NM_022079	CCDS41533.1	HERC4	RefSeq	4531	chr10	-	69681655	69835103		TATATCAACTGGGTCCAACAGCAGGCCTATGGAATGGATGTCAACCATGGATTAACTGAG	26091	Hs.51891	GO:0004842|GO:0005634|GO:0005737|GO:0005829|GO:0007283|GO:0030154|GO:0042787	probable E3 ubiquitin-protein ligase HERC4 isoform a	837.864	2673.72	9.63346	11.1313	638.754	1223.57	651.272	3113.56	2839.05	2068.54	9.43724	9.88621	9.57693	11.3192	11.3243	10.7502
ASHGA5P047950	0.00343343	0.0233571	2.00235	down	protein_coding	NM_001144061	CCDS7815.1	COPB1	RefSeq	3429	chr11	-	14479048	14521441	NM_001144062, NM_016451	AGCAATGGGTAACACACAGAGGAAAGAGGCAGCAGATCCCCTAGCATCTAAACTTAACAA	1315	Hs.339278	GO:0000139|GO:0005198|GO:0005515|GO:0005793|GO:0005798|GO:0005829|GO:0005886|GO:0006886|GO:0006890|GO:0006891|GO:0016044|GO:0019048|GO:0030126|GO:0048205	coatomer subunit beta	7650.95	16723.8	12.8488	13.8505	6382.55	10706.2	5864.13	19031.3	15789	15351.2	12.6851	13.1339	12.7273	14	13.7727	13.7787
ASHGA5P004225	0.00672769	0.0340928	2.27193	down	protein_coding	NM_013956	CCDS6083.1	NRG1	RefSeq	3093	chr8	+	32405727	32622558	NM_001159995, NM_001159999, NM_001160001	ATCGCTGCCAAAACTACGTAATGGCCAGCTTCTACAAGCATCTTGGGATTGAATTTATGG	3084	Hs.453951	GO:0000165|GO:0000902|GO:0003161|GO:0003222|GO:0003712|GO:0005102|GO:0005125|GO:0005176|GO:0005515|GO:0005576|GO:0005576|GO:0005615|GO:0005634|GO:0005737|GO:0005887|GO:0007154|GO:0007169|GO:0007171|GO:0007171|GO:0007399|GO:0007416|GO:0007422|GO:0007626|GO:0008083|GO:0008083|GO:0008283|GO:0009790|GO:0010001|GO:0010667|GO:0014032|GO:0016020|GO:0016324|GO:0016477|GO:0030296|GO:0030297|GO:0030297|GO:…	pro-neuregulin-1, membrane-bound isoform isoform HRG-beta1	58.2142	202.888	6.16686	7.35078	61.0626	56.7736	56.8065	215.046	215.69	177.929	6.33659	5.79976	6.36424	7.36254	7.58355	7.10625
ASHGA5P030471	0.00632848	0.0328854	2.14411	down	protein_coding	NM_001004341	CCDS30893.1	ETV3L	RefSeq	1977	chr1	-	157061834	157069600		ACATACAAGTTCAACTTCAGCAAGCTCATCGTAGTCAACTATCCTTTGTGGGAAGTGCGG	440695	Hs.127138	GO:0003700|GO:0005634|GO:0006351|GO:0043565	ETS translocation variant 3-like protein	5	17.2045	2.45604	3.55642	5	5	5	13.7778	18.619	19.2166	2.46913	2.40305	2.49594	3.14168	3.79317	3.73441
ASHGA5P006971	0.000402467	0.00772242	2.04677	down	protein_coding	NM_147196	CCDS43081.1	TMIE	RefSeq	1861	chr3	+	46742822	46752413		TTGTCCATCATCATCACGCTGTGCTGTGTCTTCAACTGTCGTGTGCCACGGACCCGGAAG	259236	Hs.185777	GO:0007605|GO:0016021|GO:0042472	transmembrane inner ear expressed protein precursor	14.0222	52.6475	4.25806	5.29141	12.5908	18.8701	10.6057	60.4252	46.8774	50.6401	4.25675	4.37555	4.14187	5.42464	5.22714	5.22245
ASHGA5P000943	0.0180333	0.0636001	2.19568	down	protein_coding	NM_005348	CCDS9967.1	HSP90AA1	RefSeq	3366	chr14	-	102547074	102553512		TCACTTAGCCAAGATGCCTGAGGAAACCCAGACCCAAGACCAACCGATGGAGGAGGAGGA	3320	Hs.525600	GO:0000086|GO:0000166|GO:0000278|GO:0005515|GO:0005524|GO:0005829|GO:0005829|GO:0005886|GO:0006200|GO:0006839|GO:0006986|GO:0007165|GO:0007411|GO:0016887|GO:0030235|GO:0030911|GO:0030911|GO:0042026|GO:0042470|GO:0042802|GO:0042803|GO:0044281|GO:0045040|GO:0045429|GO:0046209|GO:0050999|GO:0051082|GO:0051131	heat shock protein HSP 90-alpha isoform 2	2753.65	6812.27	11.3551	12.4898	2334.07	3901.78	2025.1	7083.22	4592.84	8760.76	11.2546	11.5982	11.2124	12.5421	12.0038	12.9234
ASHGA5P032662	0.00533405	0.0296702	2.32132	down	protein_coding	NM_001454	CCDS32739.1	FOXJ1	RefSeq	2666	chr17	-	74132414	74137380		ATCTACAAGTGGATCACGGACAACTTCTGCTACTTCCGCCACGCAGATCCCACCTGGCAG	2302	Hs.651204	GO:0000122|GO:0000976|GO:0001947|GO:0002508|GO:0002635|GO:0002635|GO:0002897|GO:0002897|GO:0002924|GO:0002924|GO:0003677|GO:0003690|GO:0003700|GO:0003705|GO:0005634|GO:0005667|GO:0006959|GO:0007283|GO:0007389|GO:0007420|GO:0007420|GO:0008134|GO:0008301|GO:0019904|GO:0030036|GO:0030036|GO:0030324|GO:0030855|GO:0032088|GO:0032088|GO:0032862|GO:0032862|GO:0033085|GO:0033085|GO:0035089|GO:0035089|GO:…	forkhead box protein J1	33.8944	129.519	5.44795	6.66289	25.6732	38.7398	37.2704	145.892	127.832	114.834	5.20701	5.30886	5.82797	6.77294	6.77063	6.44511
ASHGA5P039574	0.00516315	0.0291168	3.90336	down	protein_coding	NM_001083	CCDS3713.1	PDE5A	RefSeq	7005	chr4	-	120415549	120549981		AAGCATGGCTGGACGATCACTGGGACTTTACCTTCTCATACTTTGTTAGAAAAGCCACCA	8654	Hs.647971	GO:0001666|GO:0002026|GO:0002678|GO:0004114|GO:0005575|GO:0005829|GO:0007165|GO:0007399|GO:0007596|GO:0007614|GO:0008270|GO:0009187|GO:0010613|GO:0030553|GO:0032496|GO:0033574|GO:0042130|GO:0042311|GO:0043065|GO:0043406|GO:0045907|GO:0046069|GO:0046069|GO:0047555|GO:0055118|GO:0055119|GO:0060282	cGMP-specific 3',5'-cyclic phosphodiesterase isoform 1	6.45115	37.3447	2.80604	4.77076	5	9.35345	5	39.0344	40.9524	32.0472	2.46913	3.45305	2.49594	4.76512	5.02266	4.52449
ASHGA5P035709	0.00476647	0.0278463	2.73397	down	protein_coding	NM_005680	CCDS33143.1	TAF1B	RefSeq	2306	chr2	+	9983570	10074545		AAGATGACCATGCCACAGACACTTGCCTTCTGTTATCTGTCCTTACTTTGGCAGAGAGAA	9014	Hs.584833	GO:0001164|GO:0001187|GO:0001189|GO:0003700|GO:0005634|GO:0005654|GO:0006351|GO:0006360|GO:0006361|GO:0006362|GO:0006363|GO:0010467|GO:0017025|GO:0046872|GO:0070860	TATA box-binding protein-associated factor RNA polymerase I subunit B	679.589	2134.23	9.34774	10.7987	517.194	961.732	559.841	2461.41	2389.07	1552.21	9.15126	9.52089	9.37107	10.9874	11.072	10.3369
ASHGA5P041733	0.00459901	0.0271543	2.72412	down	protein_coding	ENST00000377173	CCDS34358.1	OR2B3	GENCODE	1106	chr6	-	29053984	29055090		TTATCTTCAATGATGGTAATGACCTTTGAACTCATTTTCCTATTTTCCAGGCTCTGGTGA	442184	Hs.553835	GO:0007186|GO:0016021|GO:0005886|GO:0004930|GO:0004984	olfactory receptor, family 2, subfamily B, member 3 [Source:HGNC Symbol;Acc:8238]	5	21.7635	2.45604	3.90183	5	5	5	16.4656	22.393	26.4318	2.46913	2.40305	2.49594	3.40705	4.07689	4.22156
ASHGA5P001382	1.87483e-05	0.00239305	2.04868	down	protein_coding	NM_016462	CCDS4514.1	TMEM14C	RefSeq	1187	chr6	+	10723147	10731362		TCGTGAGACCGGTGCAGGCCTGGGGTAGTCTCCTGTCTGGACAGAGAAGAGAAAAATGCA	51522	Hs.519557	GO:0006783|GO:0016021|GO:0031966	transmembrane protein 14C	1845.25	4281.87	10.8195	11.8542	1671.99	2352.86	1510.9	4357.92	3982.37	4505.33	10.8018	10.8566	10.8001	11.8259	11.8045	11.9322
ASHGA5P012450	0.00698905	0.0348619	2.92903	down	protein_coding	NM_014704	CCDS30571.1	CEP104	RefSeq	6458	chr1	-	3728644	3773797		TAAAATAGATGGCAGAGCTACAGATGCTGAGATGAGGGCACGGAGAAAAGCGGCTACAGA	9731	Hs.509017	GO:0005814	centrosomal protein of 104 kDa	1125.14	3698.1	10.0731	11.6235	1388.26	1267.67	719.494	3568.74	4444.65	3080.91	10.5555	9.94655	9.71711	11.5425	11.9551	11.3729
ASHGA5P002961	0.019677	0.067367	2.4551	down	protein_coding	NM_014864	CCDS1328.1	FAM20B	RefSeq	5950	chr1	+	178995073	179045702		TTATGATAGACACAATGCAGAGGTAGCAGCCTTTCACTTGGACAGGATTCTGGGTTTCCA	9917	Hs.740494	GO:0000139|GO:0005524|GO:0005794|GO:0016021|GO:0016301|GO:0016773	glycosaminoglycan xylosylkinase	23.7368	92.5655	4.83252	6.1283	13.306	40.5928	17.3115	97.1374	69.3906	111.168	4.3276	5.37354	4.7964	6.15598	5.83133	6.39758
ASHGA5P022025	0.0022301	0.0183353	3.97505	down	protein_coding	NM_001204067		ANKS1B	RefSeq	3157	chr12	-	99137751	99548868		TCTGCATTTGTTTTGACTGCTCTCATCATTCAAGATTGACGCTTGGATGGGACCCAGATG	56899	Hs.506458	GO:0005737|GO:0005886|GO:0014069|GO:0015030|GO:0030054|GO:0045211|GO:0046875	ankyrin repeat and sterile alpha motif domain-containing protein 1B isoform f	5.36987	39.5694	2.87459	4.86556	5	5.10393	6.00569	41.5898	38.9353	38.1831	2.46913	2.736	3.41864	4.85895	4.94026	4.79748
ASHGA5P038621	0.0490724	0.124364	4.98684	down	protein_coding	NM_198505	CCDS33914.1	ATP13A5	RefSeq	3657	chr3	-	192992830	193096514		TTGCTCTTGCCCACAAAACCTTAAAGATGGGGAATCTTTCAGAAGTCGAGCACTTAGCCA	344905	Hs.658032	GO:0005524|GO:0006754|GO:0006812|GO:0015662|GO:0016021|GO:0046872	probable cation-transporting ATPase 13A5	5.12798	56.7657	2.58155	4.89967	5	5.38393	5	25.0888	22.4024	122.806	2.46913	2.77957	2.49594	4.07519	4.07718	6.54664
ASHGA5P006754	0.03944	0.107182	2.00783	down	protein_coding	NM_153714	CCDS44365.1	C10orf67	RefSeq	2943	chr10	-	23605519	23633772		AATGTACCAGCCACTGTGAAACCAAACATTGAGATACTCTGGATGTGCTGAAGGTAGCAA	256815	Hs.522360		uncharacterized protein C10orf67	5.2614	19.4448	2.74857	3.75421	5	5	5.7842	18.2832	20.7953	19.2557	2.46913	2.40305	3.37354	3.56296	3.96287	3.73679
ASHGA5P055304	0.0371812	0.103015	2.10366	down	protein_coding	NM_018050	CCDS8648.1	MANSC1	RefSeq	2297	chr12	-	12482217	12503169		TCATTGACATCCAGTCATCTCTTTCTAAGGGAATCAGAGGCAATGAGCCCGTATATACTT	54682	Hs.591145	GO:0016021	MANSC domain-containing protein 1 precursor	618.683	1436.58	9.14865	10.2215	357.313	1007.8	490.935	1848.76	1388.83	1072.14	8.66777	9.59042	9.18774	10.557	10.3132	9.79439
ASHGA5P053046	0.000112704	0.00437761	3.21466	down	protein_coding	NM_001077477	CCDS53408.1	NR1I3	RefSeq	1093	chr1	-	161199455	161208000	ENST00000367980, NM_001077469, NM_001077472, NM_001077473, NM_001077476, NM_001077478, NM_001077479, NM_001077480, NM_005122	GTTCCAGGTAGAGTTTTTGGAGTTGCTCTTTCACTTCCATGGAACACTACGAAAACTGCA	9970	Hs.349642	GO:0003677|GO:0003700|GO:0003713|GO:0004879|GO:0004882|GO:0004887|GO:0005634|GO:0005654|GO:0005737|GO:0005856|GO:0006367|GO:0007165|GO:0008270|GO:0010467|GO:0030521|GO:0030522|GO:0043565	nuclear receptor subfamily 1 group I member 3 isoform 14	5	24.9068	2.45604	4.14071	5	5	5	22.919	24.1994	27.6021	2.46913	2.40305	2.49594	3.93017	4.20226	4.2897
ASHGA5P007012	0.00195245	0.0169721	2.0716	down	protein_coding	ENST00000326856	CCDS12805.1	KLK15	GENCODE	1309	chr19	-	51328544	51334779		CGGTCACAAGTGAGTCTCCCAGATACGTTGCATTGTGCCAACATCAGCATTATCTCGGAC	55554	Hs.567535	GO:0006508|GO:0005576|GO:0004252|GO:0003824|GO:0008236	kallikrein-related peptidase 15 [Source:HGNC Symbol;Acc:20453]	170.812	465.491	7.55517	8.60592	158.649	195.69	158.098	500.393	477.91	418.169	7.59739	7.36167	7.70646	8.64931	8.76054	8.40792
ASHGA5P054108	0.0104615	0.0448648	2.55363	down	protein_coding	ENST00000371594	CCDS14579.1	CXorf56	GENCODE	2326	chrX	-	118672111	118699397	ENST00000536133, NM_001170569	TAGAGTTTTCAGATTGCTCTTGGGAATCATGCCGAAAGTAGTGTCTCGGTCAGTAGTCTG	63932	Hs.248572		chromosome X open reading frame 56 [Source:HGNC Symbol;Acc:26239]	6.12025	24.3743	2.75457	4.10712	5	8.36074	5	22.8189	26.38	23.9241	2.46913	3.29865	2.49594	3.92462	4.33463	4.06212
ASHGA5P034420	0.00378959	0.0245703	2.94393	down	protein_coding	NM_001974	CCDS12175.1	EMR1	RefSeq	3161	chr19	+	6887559	6940464	NM_001256252, NM_001256253	AAACTACTCTTGTTTCTGCAACCCAGGATTTGAATCCAGCAGTGGCCACTTGAGTTTCCA	2015	Hs.2375	GO:0004930|GO:0005509|GO:0005887|GO:0007155|GO:0007186|GO:0007218|GO:0009897	EGF-like module-containing mucin-like hormone receptor-like 1 isoform 1 precursor	5.72699	31.0266	2.93393	4.49167	5	6.55942	5.62157	30.7407	30.7404	31.5987	2.46913	2.99302	3.33965	4.40039	4.57248	4.50216
ASHGA5P011798	0.0273684	0.0839147	2.18985	down	protein_coding	NM_002721	CCDS6861.1	PPP6C	RefSeq	4256	chr9	-	127908851	127952218	NM_001123355	ATATCCATGGACAGTTTTATGACCTTTGTGAACTGTTCAGAACTGGAGGTCAGGTTCCTG	5537	Hs.731864	GO:0000082|GO:0004722|GO:0005515|GO:0005829|GO:0006470|GO:0046872	serine/threonine-protein phosphatase 6 catalytic subunit isoform b	1365.6	3396.22	10.3522	11.4831	901.388	1685.12	1510.31	3988.59	3649.53	2550.54	9.90852	10.3493	10.7989	11.7098	11.6792	11.0602
ASHGA5P046395	0.00193378	0.0168844	2.54661	down	protein_coding	NM_004992	CCDS14741.1	MECP2	RefSeq	10241	chrX	-	153287263	153363188		CCTTGCTTCTGTAGACCAGCTCCAACAGGATTCCATGGTAGCTGGGATGTTAGGGCTCAG	4204	Hs.200716	GO:0000122|GO:0000400|GO:0000790|GO:0000792|GO:0001662|GO:0001666|GO:0001964|GO:0001976|GO:0002087|GO:0003677|GO:0003700|GO:0003714|GO:0003729|GO:0005515|GO:0005634|GO:0005829|GO:0006020|GO:0006122|GO:0006342|GO:0006349|GO:0006351|GO:0006541|GO:0007416|GO:0007585|GO:0007616|GO:0008104|GO:0008134|GO:0008211|GO:0008284|GO:0008327|GO:0008344|GO:0008542|GO:0009405|GO:0009790|GO:0009791|GO:0010385|GO:…	methyl-CpG-binding protein 2 isoform 1	41.254	163.729	5.67621	7.02479	43.7038	52.4819	27.5764	171.768	173.306	146.111	5.90273	5.69791	5.428	7.01726	7.24631	6.8108
ASHGA5P004605	0.00407993	0.0254928	2.12846	down	protein_coding	NM_152523	CCDS2377.1	CCNYL1	RefSeq	3674	chr2	+	208576263	208620896	NM_001142300	GAACCTAGAGGCTATTTCTAGATTGTGTGAAGACAAAGACTTGTGTAGAGCCGCTATGAG	151195	Hs.471234	GO:0000079|GO:0019901	cyclin-Y-like protein 1 isoform 2	1120.72	2778.7	10.104	11.1938	1004.01	1423.95	934.198	3240.62	2924.26	2171.22	10.0754	10.1343	10.1024	11.3873	11.3669	10.8274
ASHGA5P004093	0.0203363	0.0687743	2.13355	down	protein_coding	NM_152754	CCDS34676.1	SEMA3D	RefSeq	6276	chr7	-	84624871	84751247		GCAGATACTTACTTTGATGAGCTTCAAGATATTTATTTACTCCCCACAAGAGATGAAAGA	223117	Hs.201340	GO:0004872|GO:0005576|GO:0007399|GO:0016020|GO:0030154	semaphorin-3D precursor	56.879	183.079	6.07641	7.16966	42.6896	81.4019	46.5456	147.356	232.759	169.123	5.86772	6.25943	6.10207	6.78718	7.69174	7.03005
ASHGA5P000760	0.00462609	0.027262	2.99445	down	protein_coding	ENST00000173229	CCDS11148.1	NTN1	GENCODE	5954	chr17	+	8924858	9147317		ATTAACATGAAAAAGTACTGCAAGAAGGACTATGCCGTCCAGATCCACATCCTGAAGGCG	9423	Hs.660885	GO:0007411|GO:0006915|GO:0001764|GO:0008284|GO:0030334|GO:0016337|GO:0045773|GO:0030517|GO:0060603|GO:0040023|GO:0030879|GO:0007409|GO:0005737|GO:0005576|GO:0005604|GO:0005578|GO:0005515	netrin 1 [Source:HGNC Symbol;Acc:8029]	5.87585	27.5906	2.71339	4.29568	5	7.62754	5	27.7784	30.9824	24.0109	2.46913	3.17511	2.49594	4.23349	4.58503	4.06853
ASHGA5P013079	0.0012834	0.0136824	2.32906	down	protein_coding	NM_182935	CCDS2687.1	MOBP	RefSeq	3077	chr3	+	39509069	39557494	NR_003090	CCAGAAGACCAGATTGAAAAGGAAGATCAGGCCAACCCCAAAGAAGAAGTGACCAAGGAG	4336	Hs.121333	GO:0005634|GO:0005730|GO:0005737|GO:0005739|GO:0007399|GO:0019911|GO:0043231|GO:0048471	myelin-associated oligodendrocyte basic protein	44.7993	167.526	5.82845	7.04819	46.4386	46.7275	41.2319	180.711	141.15	180.717	5.98135	5.55525	5.94874	7.09368	6.92145	7.12945
ASHGA5P042077	0.0416861	0.111215	2.34967	down	protein_coding	NM_000416	CCDS5185.1	IFNGR1	RefSeq	2138	chr6	-	137518620	137540567		GATTCCAGTTGTTGCTGCTTTACTACTCTTTCTAGTGCTTAGCCTGGTATTCATCTGTTT	3459	Hs.520414	GO:0004906|GO:0005886|GO:0005887|GO:0007165|GO:0009615|GO:0019221|GO:0019955|GO:0060333|GO:0060334	interferon gamma receptor 1 precursor	650.406	1769.52	9.28444	10.5169	387.575	740.264	823.378	2193.39	1852.64	1262.53	8.76965	9.16448	9.91917	10.8089	10.7117	10.0301
ASHGA5P032311	0.0192839	0.0664791	2.9173	down	protein_coding	NM_004740	CCDS32599.1	TIAF1	RefSeq	2110	chr17	-	27400538	27402627		CCAAGGAAGGTTTTTACTTAACAATGTTTGGCTTTTGGGGAGTGCTCTGACGCAGCTTTG	9220	Hs.462590	GO:0003674|GO:0005634|GO:0006915|GO:0007249	TGFB1-induced anti-apoptotic factor 1	6.53779	34.1008	3.08617	4.6308	5	6.73447	7.8789	29.2973	36.6395	36.3656	2.46913	3.024	3.76538	4.32192	4.84861	4.72188
ASHGA5P045070	0.000135662	0.00475529	2.17046	down	protein_coding	ENST00000330824	CCDS34954.1	GPIHBP1	GENCODE	2281	chr8	+	144295067	144299044		TGACGCAGAACTGCTCACATGGCCAGACCTGCACAACCCTCATTGCCCACGGGAACACCG	338328	Hs.426410	GO:0006886|GO:0042632|GO:0006869|GO:0051006|GO:0050821|GO:0070328|GO:0045056|GO:0034394|GO:0017038|GO:0071503|GO:0090321|GO:0016021|GO:0005622|GO:0016323|GO:0031362|GO:0009897|GO:0016324|GO:0034364|GO:0046658|GO:0009986|GO:0008289|GO:0034185|GO:0071813|GO:0008035|GO:0008320|GO:0035473|GO:0035478	glycosylphosphatidylinositol anchored high density lipoprotein binding protein 1 [Source:HGNC Symbol;Acc:24945]	53.1114	176.41	6.02266	7.14066	52.7138	65.9076	40.7127	182.105	171.599	175.525	6.14417	5.99172	5.93209	7.10498	7.23061	7.08639
ASHGA5P050704	0.0409964	0.109972	3.11529	down	protein_coding	NM_000210	CCDS2249.1	ITGA6	RefSeq	5810	chr2	+	173292313	173371181		ATGCCACATATCACAAGGCTGAGATCCATGCTCAGCCATCTGATAAAGAGAGGCTTACTT	3655	Hs.133397	GO:0005178|GO:0005515|GO:0005604|GO:0005886|GO:0005886|GO:0005913|GO:0007044|GO:0007160|GO:0007229|GO:0007596|GO:0009897|GO:0009925|GO:0010811|GO:0016337|GO:0022409|GO:0030175|GO:0031581|GO:0031668|GO:0033627|GO:0034329|GO:0034676|GO:0042327|GO:0042475|GO:0043065|GO:0043066|GO:0043236|GO:0045944|GO:0046847|GO:0050873|GO:0050900|GO:0071407	integrin alpha-6 isoform b precursor	392.927	1288.5	8.39104	10.0304	157.782	751.178	269.82	1853.58	1133.04	878.884	7.59001	9.1896	8.39349	10.5627	10.0083	9.52013
ASHGA5P054484	0.00253119	0.0197612	2.15119	down	protein_coding	NM_052836	CCDS44429.1	CDH23	RefSeq	2684	chr10	+	73156690	73407219		GGCACCCCCAAATCCCTGAGCTGTGTTTGTTGGTGTATTAAATAAAGTTTTTGGACTCTT	64072	Hs.656032	GO:0005509|GO:0005515|GO:0005886|GO:0006816|GO:0007156|GO:0007605|GO:0016020|GO:0016021|GO:0016339|GO:0032420|GO:0045494|GO:0050896|GO:0050953|GO:0050957|GO:0051480	cadherin-23 isoform 2 precursor	375.678	979.976	8.60673	9.71186	371.892	407.236	347.906	1057.53	1008.37	874.036	8.72021	8.35201	8.74797	9.76168	9.86027	9.51364
ASHGA5P011005	0.000314545	0.00685598	2.19096	down	protein_coding	NM_016567	CCDS7649.1	BCCIP	RefSeq	1461	chr10	+	127512103	127542264		ATACAGCACAATGGTGGTTCACGGGGGCAAGTGACAGCCCTGGTTTCTCTGAAGGCTGGA	56647	Hs.715543	GO:0000079|GO:0005515|GO:0005634|GO:0006281|GO:0007049|GO:0019207|GO:0019908|GO:0061101	BRCA2 and CDKN1A-interacting protein isoform BCCIPalpha	2006.48	5086.51	10.9589	12.0905	1932.72	2285.49	1801.23	5321.84	5274.86	4662.84	11.0075	10.8111	11.0581	12.0953	12.1951	11.9811
ASHGA5P054042	0.00878026	0.0402848	3.06192	down	protein_coding	NM_005296	CCDS14441.1	LPAR4	RefSeq	2627	chrX	+	78003205	78012578		GTGCTGTCTACAGTGTTGTATTCATCTTGGGTCTGATAACCAACAGTGTCTCTCTGTTTG	2846	Hs.522701	GO:0004930|GO:0005886|GO:0005887|GO:0007186|GO:0008289|GO:0045028	lysophosphatidic acid receptor 4	6.52071	29.9692	2.81457	4.42901	5	9.56213	5	33.6252	27.9934	28.2891	2.46913	3.47864	2.49594	4.53909	4.4221	4.32583
ASHGA5P002578	0.0192854	0.0664791	2.62239	down	protein_coding	NM_002595	CCDS9061.1	CDK17	RefSeq	4194	chr12	-	96672038	96794366		CCAGAGACAGGACATGGGAAGAACAGAAGACAGAGCATGCTCTTTTAAGTCTGATAACAT	5128	Hs.506415	GO:0004672|GO:0004693|GO:0005524|GO:0006468	cyclin-dependent kinase 17 isoform 1	1443.18	4399.06	10.423	11.8139	970.685	2050.52	1308.34	6135.02	4193.79	2868.36	10.0244	10.654	10.5906	12.3167	11.87	11.2551
ASHGA5P012728	0.000573557	0.00915404	2.17876	down	protein_coding	NM_002451	CCDS6509.1	MTAP	RefSeq	4937	chr9	+	21802634	21865969		CGAGGAAGCAGTTTCGGTGGACCGGGTCTTAAAGACCCTGAAAGAAAACGCTAATAAAGC	4507	Hs.193268	GO:0000096|GO:0004645|GO:0005634|GO:0005829|GO:0006139|GO:0006166|GO:0006595|GO:0006738|GO:0017061|GO:0019509|GO:0019509|GO:0034641|GO:0044281	S-methyl-5'-thioadenosine phosphorylase	845.106	2098.58	9.67288	10.7964	731.306	1116.86	687.152	2393.85	2049.66	1852.23	9.61904	9.75047	9.64912	10.9376	10.862	10.5895
ASHGA5P046131	0.0346604	0.0984239	3.96362	down	protein_coding	NM_001168465	CCDS55386.1	MAP7D2	RefSeq	4158	chrX	-	20024830	20135114		TTAGTCCAATGGAAGCCATTCTTGTTTCGCGACTGTTGACACCCACACAGTCTTCTTTAG	256714	Hs.127951		MAP7 domain-containing protein 2 isoform 1	8.53258	58.1475	3.38574	5.37256	5	10.4471	10.1506	44.0519	87.5915	42.7992	2.46913	3.60016	4.08794	4.94844	6.19479	4.97446
ASHGA5P017825	0.00190624	0.0167319	2.91222	down	protein_coding	ENST00000446176	CCDS48040.1	FNBP1	GENCODE	5425	chr9	-	132649465	132805473		ACCTCCAAACCCAAAATCCACTGCTTCAGGAGCCTAAAGCGTGGGCTTTCTCTCAAGCTG	23048	Hs.189409	GO:0006412|GO:0007165|GO:0007399|GO:0006897|GO:0005886|GO:0005622|GO:0005856|GO:0005840|GO:0005938|GO:0005764|GO:0005905|GO:0016023|GO:0003723|GO:0005515|GO:0008289|GO:0003735|GO:0042802	formin binding protein 1 [Source:HGNC Symbol;Acc:17069]	468.009	1629.34	8.89113	10.4332	537.918	462.618	403.493	1565.59	1672.48	1649.94	9.20823	8.52687	8.93829	10.3095	10.5722	10.4181
ASHGA5P009209	3.7461e-05	0.00286054	2.62902	down	protein_coding	NM_001891	CCDS3532.1	CSN2	RefSeq	1078	chr4	-	70820973	70826726		TAAACATGAGGACCAGCAGCAAGGAGAGGATGAACACCAGGATAAAATCTACCCCTCTTT	1447	Hs.2242	GO:0004857|GO:0005215|GO:0005509|GO:0005576|GO:0006816|GO:0043086	beta-casein precursor	70.9003	271.471	6.39512	7.78965	60.2311	90.8859	61.5839	281.925	234.853	297.636	6.31798	6.39827	6.46911	7.77048	7.70592	7.89254
ASHGA5P054781	0.000329913	0.00699759	3.85476	down	protein_coding	NM_002233	CCDS41629.1	KCNA4	RefSeq	4179	chr11	-	30031287	30038577		AACTGTTCTAATGCAAAGGCTGTGGAGACTGATGTGTGAATCTTTTTCCACCTGCCACTG	3739	Hs.592002	GO:0005249|GO:0005515|GO:0005886|GO:0006813|GO:0007268|GO:0008076|GO:0030955|GO:0051260	potassium voltage-gated channel subfamily A member 4	5.46433	33.1163	2.64282	4.58946	5	6.39298	5	35.3242	32.7962	31.2284	2.46913	2.96337	2.49594	4.61139	4.67241	4.48457
ASHGA5P000686	0.00281989	0.0210462	2.65633	down	protein_coding	ENST00000054666	CCDS88.1	VAMP3	GENCODE	2205	chr1	+	7831328	7841492		CTGCCAAAATGTCTACAGGTCCAACTGCTGCCACTGGCAGTAATCGAAGACTTCAGCAGA	9341	Hs.66708	GO:0015031|GO:0016192|GO:0042147|GO:0006461|GO:0006904|GO:0006887|GO:0034446|GO:0017156|GO:0001921|GO:0006944|GO:0016021|GO:0005886|GO:0030054|GO:0019717|GO:0005792|GO:0016324|GO:0055037|GO:0045202|GO:0031201|GO:0030136|GO:0030665|GO:0043229|GO:0031410|GO:0005515|GO:0017075|GO:0000149	vesicle-associated membrane protein 3 (cellubrevin) [Source:HGNC Symbol;Acc:12644]	305.151	930.287	8.2213	9.63074	202.937	481.549	230.966	1092.61	813.73	884.526	7.90053	8.57765	8.18574	9.8075	9.5563	9.52842
ASHGA5P007557	0.00249612	0.0195936	2.06918	down	protein_coding	NM_152641	CCDS31783.1	ARID2	RefSeq	8466	chr12	+	46123619	46301819		AAGTCTCATGAAGGTACATCAGGAGAATGGATTTGGGAGTCTTTATTTCATCCACCTCGA	196528	Hs.317304	GO:0003677|GO:0005515|GO:0005634|GO:0006337|GO:0006351|GO:0006355|GO:0008270|GO:0016568	AT-rich interactive domain-containing protein 2	7.77363	32.0258	3.48724	4.5363	8.27423	9.77544	5.27121	33.6019	33.117	29.3583	3.7	3.50507	3.25665	4.53726	4.68698	4.38467
ASHGA5P010359	0.00622201	0.0325642	3.58156	down	protein_coding	NM_001005783	CCDS901.1	HAO2	RefSeq	1696	chr1	+	119911401	119936751		AGATGTGGAGTGAATGTGAAGGTCCAGAAATGTCCTTGGTGTGTTTGACAGACTTTCAGG	51179	Hs.659767	GO:0003973|GO:0005102|GO:0005739|GO:0005777|GO:0010181|GO:0018924|GO:0019395|GO:0051260|GO:0052852|GO:0052853|GO:0052854	hydroxyacid oxidase 2	7.33263	43.8007	3.17931	5.01989	7.57069	9.42719	5	48.1431	42.7114	40.5475	3.57992	3.46205	2.49594	5.08052	5.08858	4.89058
ASHGA5P006249	0.017966	0.0635218	2.37131	down	protein_coding	NM_020666	CCDS4437.1	CLK4	RefSeq	2524	chr5	-	178029664	178054054		AGTCATCAGTCACGTTCGAAGAGCCACCGAAGGAAAAGATCCAGGAGTATAGAGGATGAT	57396	Hs.406557	GO:0004674|GO:0004712|GO:0004713|GO:0005524|GO:0005634|GO:0018108|GO:0043484|GO:0046777	dual specificity protein kinase CLK4	78.7041	248.743	6.39712	7.64281	45.4689	134.482	56.1612	309.61	229.31	207.309	5.95064	6.89183	6.3489	7.92339	7.6707	7.33433
ASHGA5P014400	0.00397944	0.0251154	2.09625	down	protein_coding	NM_018051	CCDS47757.1	WDR60	RefSeq	3789	chr7	+	158649268	158738883		AGAAAGAAAGCTGCAGTACGGAGACAGCAAGGACAACCCTCTCAAGTACTGGCTTTATAA	55112	Hs.389945		WD repeat-containing protein 60	121.557	338.175	7.0568	8.12462	108.484	175.94	80.2471	363.823	355.463	295.24	7.10867	7.23628	6.82547	8.16761	8.32831	7.87793
ASHGA5P004066	0.00439402	0.0265237	2.55478	down	protein_coding	ENST00000283303	CCDS4922.2	GPR115	GENCODE	3162	chr6	+	47666288	47689757		TCTGGGCTGCTAGATCTACTTCCTGGATGCCGTGAAGATCCTCATGTATGAAAATGAAGT	221393	Hs.150131	GO:0007186|GO:0007218|GO:0007166|GO:0016021|GO:0005886|GO:0016020|GO:0004930|GO:0004888	G protein-coupled receptor 115 [Source:HGNC Symbol;Acc:19011]	15.5553	71.4121	4.41294	5.76614	11.7048	16.9528	18.0082	73.3544	73.2451	67.6367	4.15513	4.23412	4.84958	5.71907	5.92036	5.65899
ASHGA5P005728	0.00131724	0.013904	2.7081	down	protein_coding	NM_000410	CCDS4578.1	HFE	RefSeq	2222	chr6	+	26087508	26095469	NM_139006, NM_139009	TTCACTGTTGACTTCTGGACTATTATGGAAAATCACAACCACAGCAAGGAGTCCCACACC	3077	Hs.233325	GO:0002474|GO:0005515|GO:0005737|GO:0005769|GO:0005886|GO:0005887|GO:0006461|GO:0006826|GO:0006879|GO:0006898|GO:0006955|GO:0007565|GO:0010106|GO:0031410|GO:0042446|GO:0042612|GO:0045177|GO:0045178|GO:0048471|GO:0055037|GO:0060586	hereditary hemochromatosis protein isoform 1 precursor	5.27655	23.4488	2.60941	4.04669	5	5.82966	5	25.6153	24.6208	20.1103	2.46913	2.86317	2.49594	4.10775	4.22902	3.80331
ASHGA5P044005	0.000141602	0.00485601	3.28014	down	protein_coding	NM_001006658	CCDS31007.1	CR2	RefSeq	4184	chr1	+	207627644	207663240		TTGCTTGTGGGAAACAAATCCATTCACTGTATGCCTTCAGGAAATTGGAGTCCTTCTGCC	1380	Hs.445757	GO:0004875|GO:0004888|GO:0005886|GO:0006955|GO:0006958|GO:0009897|GO:0016021|GO:0042113|GO:0042803|GO:0045087	complement receptor type 2 isoform 1 precursor	5	25.3899	2.45604	4.1698	5	5	5	24.2961	27.6445	24.2292	2.46913	2.40305	2.49594	4.02425	4.40174	4.0834
ASHGA5P016327	0.000668765	0.00982461	4.35094	down	protein_coding	NM_078476	CCDS47390.1	BTN2A1	RefSeq	3162	chr6	+	26458152	26469866		TTACATGCTGAGCTCCAATTCTTCTCAAACTGAGAGAACTGCTTCTGTCTCTGGAGAGAC	11120	Hs.159028	GO:0003674|GO:0005887|GO:0006629	butyrophilin subfamily 2 member A1 isoform 2 precursor	5.0184	37.5489	2.6628	4.78413	5.0552	5	5	40.2148	37.0188	35.4131	3.08941	2.40305	2.49594	4.80792	4.86516	4.67931
ASHGA5P029557	0.00108658	0.0124771	2.87771	down	protein_coding	NM_001001523	CCDS30856.1	RORC	RefSeq	3054	chr1	-	151778546	151798553		ACCCCCTGCTGAGAAGGACAGGGAGCCAAGGCCGGCAGAGCCAAGGCTCAGTCATGAGAA	6097	Hs.256022	GO:0003677|GO:0003707|GO:0004879|GO:0005654|GO:0006367|GO:0006468|GO:0008270|GO:0010467|GO:0030522|GO:0033077|GO:0043565|GO:0048535|GO:0048537|GO:0072539	nuclear receptor ROR-gamma isoform b	20.9536	106.657	4.83032	6.35524	20.0131	23.4232	19.4246	129.066	103.115	87.7908	4.87814	4.65409	4.95873	6.57612	6.43654	6.05306
ASHGA5P007056	0.000210048	0.00574575	2.59184	down	protein_coding	NM_031481	CCDS13744.1	SLC25A18	RefSeq	2087	chr22	+	18043182	18073647		ACTGTGCCAGGAAACTCTGGATTCAGGAGGGACCATCTGCCTTCATGAAAGGCGCTGGCT	83733	Hs.282982	GO:0005743|GO:0015293|GO:0016021	mitochondrial glutamate carrier 2	5	20.4708	2.45604	3.83002	5	5	5	24.2149	18.8464	18.351	2.46913	2.40305	2.49594	4.01812	3.80918	3.66275
ASHGA5P005645	0.000460812	0.00826415	2.1216	down	protein_coding	NM_000301	CCDS5279.1	PLG	RefSeq	3538	chr6	+	161123224	161175085		AAACTTCCCCTGCAAAAATTTGGATGAAAACTACTGCCGCAATCCTGACGGAAAAAGGGC	5340	Hs.143436	GO:0002576|GO:0004252|GO:0005515|GO:0005576|GO:0005615|GO:0005886|GO:0006508|GO:0007596|GO:0007596|GO:0008285|GO:0010812|GO:0019904|GO:0022617|GO:0022617|GO:0030168|GO:0030198|GO:0031093|GO:0031232|GO:0034185|GO:0042730|GO:0043498|GO:0048771|GO:0051918|GO:0051919|GO:2000048	plasminogen isoform 1 precursor	40.2829	138.453	5.68418	6.76933	38.4259	47.2841	35.1388	148.103	139.476	127.779	5.7353	5.57076	5.74647	6.79602	6.90321	6.60876
ASHGA5P019545	0.0442705	0.115821	2.08263	down	protein_coding	NM_001164317	CCDS54599.1	FLNB	RefSeq	9560	chr3	+	57994126	58157982		TTTCAGAGTTCTTTAAAGGTGACCCGAAGGGTGACTTTAATAAGACAGGCTTGGTGGAGC	2317	Hs.476448	GO:0003779|GO:0005515|GO:0005737|GO:0005829|GO:0005886|GO:0005938|GO:0007016|GO:0007165|GO:0007517|GO:0015629|GO:0016021|GO:0019221|GO:0030018|GO:0030036|GO:0030154|GO:0042802	filamin-B isoform 1	6.7058	21.3788	2.84127	3.89968	5	10.1174	5	24.5689	19.2675	20.2999	2.46913	3.55875	2.49594	4.03717	3.84165	3.82021
ASHGA5P003955	0.0418918	0.111543	2.45478	down	protein_coding	NM_002848	CCDS8674.1	PTPRO	RefSeq	6295	chr12	+	15475190	15751265	NM_030667	TAAAAAGAGTGTAACACGCAATGTCATGACTGCAATTCTCAGCTTGCCTCCAGGCGACAT	5800	Hs.160871	GO:0000902|GO:0002548|GO:0003093|GO:0003105|GO:0004725|GO:0004725|GO:0004725|GO:0005001|GO:0005515|GO:0005886|GO:0005887|GO:0006470|GO:0006470|GO:0007411|GO:0010812|GO:0010977|GO:0016021|GO:0016324|GO:0016328|GO:0016791|GO:0017147|GO:0030027|GO:0030032|GO:0030424|GO:0030426|GO:0032835|GO:0035335|GO:0036060|GO:0036060|GO:0042803|GO:0043005|GO:0043197|GO:0072112|GO:0090090|GO:0090260	receptor-type tyrosine-protein phosphatase O isoform b precursor	8.6859	34.4045	3.35802	4.65361	8.52085	12.5369	5	33.7027	35.5672	33.9434	3.73785	3.84027	2.49594	4.54329	4.8025	4.61505
ASHGA5P047872	0.00631848	0.032857	4.98627	down	protein_coding	ENST00000332249	CCDS44529.1	OR52L1	GENCODE	1094	chr11	-	6007121	6008215		ACACAAAAGGATTGATCTGAACATATTCTCATTGTTTCCTTCGGAGGCTTCTTCTGCGGA	338751	Hs.553703	GO:0007186|GO:0016021|GO:0005886|GO:0004930|GO:0004984	olfactory receptor, family 52, subfamily L, member 1 [Source:HGNC Symbol;Acc:14785]	7.25739	50.2047	2.90763	5.2256	5	11.7722	5	51.0399	54.5713	45.0028	2.46913	3.75783	2.49594	5.17381	5.45545	5.04753
ASHGA5P001259	0.0151369	0.0565741	2.86544	down	protein_coding	NM_030753	CCDS11505.1	WNT3	RefSeq	1506	chr17	-	44841686	44896082		TGAACAAGCACAACAACGAGGCGGGCCGCACGACTATCCTGGACCACATGCACCTCAAAT	7473	Hs.445884	GO:0000902|GO:0001707|GO:0005109|GO:0005110|GO:0005578|GO:0005615|GO:0005615|GO:0005769|GO:0005770|GO:0005886|GO:0007223|GO:0007411|GO:0008284|GO:0009880|GO:0009948|GO:0009950|GO:0010628|GO:0019904|GO:0030182|GO:0030917|GO:0035115|GO:0035116|GO:0042472|GO:0044338|GO:0044339|GO:0045121|GO:0045599|GO:0048018|GO:0048697|GO:0048843|GO:0060064|GO:0060070|GO:0060174|GO:0060323|GO:0061180|GO:0071300|GO:…	proto-oncogene Wnt-3 precursor	5.53731	27.9828	2.80427	4.32303	5	5	6.61194	30.4632	24.4339	29.0513	2.46913	2.40305	3.54063	4.38356	4.21645	4.36906
ASHGA5P017292	0.00518488	0.0291756	2.16822	down	protein_coding	NM_001168216	CCDS54428.1	ALS2CR11	RefSeq	1779	chr2	-	202352143	202483905		GGAGCTTGAAAATATTGTAGGAGTAGGTGGCTTTTTCACCAAAAGAATATAATTCACCAT	151254	Hs.335788		amyotrophic lateral sclerosis 2 chromosomal region candidate gene 11 protein isoform 4	5	17.3782	2.45604	3.57255	5	5	5	14.1192	18.9096	19.1057	2.46913	2.40305	2.49594	3.17669	3.81479	3.72617
ASHGA5P054725	0.000186239	0.00540005	2.03726	down	protein_coding	NM_001098579	CCDS44538.1	MRVI1	RefSeq	6045	chr11	-	10594637	10673848		TTGACTTGTCCTTTTGGCATCTCCCCAGCCTGTGGAGCCCAGGCCTCTTGGAGCATCTTT	10335	Hs.501898	GO:0005515|GO:0005789|GO:0007596|GO:0016021|GO:0016529|GO:0031095|GO:0048471	protein MRVI1 isoform a	2688.94	6111.8	11.3358	12.3625	2381.28	3535.7	2149.85	6175.03	5644.86	6515.51	11.2762	11.4421	11.2892	12.3241	12.2904	12.4729
ASHGA5P037028	0.0014799	0.0146097	2.82508	down	protein_coding	NM_020884	CCDS42869.1	MYH7B	RefSeq	6530	chr20	+	33543703	33590240		ATCCGTGCCTTCAATGCCGTCAAGAACTGGTCATGGATGAAGCTCTTTTTCAAGATGAAG	57644	Hs.414122	GO:0003774|GO:0003779|GO:0005524|GO:0016020|GO:0032982	myosin-7B	5.61322	25.2579	2.66913	4.16742	5	6.83967	5	26.0015	25.1469	24.6252	2.46913	3.04231	2.49594	4.12887	4.26313	4.11026
ASHGA5P012463	0.0128939	0.0512439	2.25344	down	protein_coding	NM_182752	CCDS47.1	TPRG1L	RefSeq	2440	chr1	+	3541555	3546694		ATTCCAGTTTCCCCCTAAATCGCTCAACAAGCGAGAAGGTTTTGGGATTCGAATTCAGTG	127262	Hs.20529	GO:0008021|GO:0030054|GO:0042802	tumor protein p63-regulated gene 1-like protein	81.1425	247.633	6.4648	7.63693	48.4781	132.734	62.2153	249.058	197.469	296.373	6.03827	6.87255	6.48358	7.58248	7.44282	7.88548
ASHGA5P009019	0.0482661	0.122999	2.22141	down	protein_coding	NM_002482	CCDS524.1	NASP	RefSeq	3301	chr1	+	46049659	46084578	NM_152298	TCCTGCTCCTTCTACATCTGCAGATAAAGTGGAGAGTCTGGATGTGGATAGTGAAGCTAA	4678	Hs.319334	GO:0001824|GO:0005634|GO:0005737|GO:0006260|GO:0007049|GO:0008283|GO:0015031|GO:0042393|GO:0043486|GO:0051879	nuclear autoantigenic sperm protein isoform 2	372.419	829.276	8.31909	9.47057	212.192	724.363	180.701	929.008	734.741	824.079	7.96205	9.13029	7.86494	9.57004	9.41225	9.42942
ASHGA5P007251	0.00526623	0.0294209	2.0475	down	protein_coding	NM_001572	CCDS7703.1	IRF7	RefSeq	1972	chr11	-	612554	615999	ENST00000397566	TGTGCTGGAGGCCCAGGGCTCCCTGCTGGGGAGCTGTACGGGTGGGCAGTAGAGACGACC	3665	Hs.166120	GO:0000122|GO:0000979|GO:0000982|GO:0002756|GO:0002819|GO:0003677|GO:0005515|GO:0005634|GO:0005654|GO:0005737|GO:0005829|GO:0006366|GO:0006468|GO:0006473|GO:0006974|GO:0008063|GO:0009615|GO:0010008|GO:0016064|GO:0019043|GO:0019221|GO:0032479|GO:0032607|GO:0032608|GO:0032727|GO:0032727|GO:0032728|GO:0034124|GO:0034127|GO:0034138|GO:0034142|GO:0035666|GO:0039530|GO:0045087|GO:0045351|GO:0045655|GO:…	interferon regulatory factor 7 isoform a	81.6915	247.368	6.60759	7.64145	80.6822	84.8517	79.5406	287.945	230.775	223.383	6.70298	6.3061	6.81369	7.80419	7.67932	7.44085
ASHGA5P028747	0.000417418	0.00779637	2.93237	down	protein_coding	NM_000209	CCDS9327.1	PDX1	RefSeq	2573	chr13	+	28494167	28500451		AGCTGCCTTTCCCATGGATGAAGTCTACCAAAGCTCACGCGTGGAAAGGCCAGTGGGCAG	3651	Hs.32938	GO:0000122|GO:0001889|GO:0003309|GO:0003309|GO:0003682|GO:0003700|GO:0005634|GO:0005829|GO:0006006|GO:0006091|GO:0006366|GO:0007263|GO:0008284|GO:0008285|GO:0009887|GO:0016331|GO:0030073|GO:0031017|GO:0031018|GO:0042593|GO:0043565|GO:0045944|GO:0048565|GO:0051594	pancreas/duodenum homeobox protein 1	21.3291	108.797	4.84687	6.39894	22.1175	23.5073	18.3624	119.839	109.859	96.6922	5.00552	4.65893	4.87616	6.4618	6.5359	6.19911
ASHGA5P000827	0.000304337	0.00676617	2.26237	down	protein_coding	NM_005954	CCDS10762.1	MT3	RefSeq	599	chr16	+	56623266	56625000		TGCCCTTCTGGTGGCTCCTGCACCTGCGCGGACTCCTGCAAGTGCGAGGGATGCAAATGC	4504	Hs.73133	GO:0000060|GO:0001666|GO:0001934|GO:0005507|GO:0005507|GO:0005515|GO:0005622|GO:0005737|GO:0006112|GO:0006707|GO:0006829|GO:0006875|GO:0006875|GO:0006882|GO:0008021|GO:0008144|GO:0008270|GO:0008283|GO:0010507|GO:0010628|GO:0010628|GO:0010940|GO:0010942|GO:0010942|GO:0014002|GO:0016209|GO:0016234|GO:0016570|GO:0019430|GO:0030295|GO:0030308|GO:0030308|GO:0030308|GO:0030517|GO:0030949|GO:0032095|GO:…	metallothionein-3	17680	47510.5	14.1423	15.3201	16623.9	18933.1	17483.1	48853.3	50513.9	43164.1	14.0634	14.0333	14.3302	15.329	15.3757	15.2558
ASHGA5P005186	8.25777e-05	0.00383765	5.02659	down	protein_coding	NM_001040261	CCDS47142.1	DCLK2	RefSeq	4316	chr4	+	150999425	151178608		CCAGCTTCAGTAAAGCGGGGTGGCCACTACTCCAGTGCCTATTCTACAGCCAAATCCCCA	166614	Hs.591683	GO:0004674|GO:0005524|GO:0005737|GO:0005856|GO:0035556	serine/threonine-protein kinase DCLK2 isoform b	5.10161	40.6211	2.57756	4.90714	5	5.30483	5	37.8164	42.5025	41.5445	2.46913	2.76761	2.49594	4.71367	5.08012	4.92762
ASHGA5P026500	0.0338076	0.09683	2.48391	down	protein_coding	NM_006244	CCDS8085.1	PPP2R5B	RefSeq	2766	chr11	+	64692142	64701950		ATTTCTGGAACAATGAGTATATCCTAAGCCTCATTGAGGACAACTGCCACACTGTGCTGC	5526	Hs.75199	GO:0000159|GO:0005515|GO:0005737|GO:0005829|GO:0006987|GO:0008601|GO:0010469|GO:0010976|GO:0030968|GO:0031334|GO:0031952|GO:0050730|GO:0051091|GO:0051388|GO:0070317|GO:0071158|GO:0071363	serine/threonine-protein phosphatase 2A 56 kDa regulatory subunit beta isoform	7.83953	32.6703	3.25479	4.5674	5	12.1022	6.41641	30.1614	32.7639	35.0856	2.46913	3.79317	3.50206	4.36831	4.67007	4.66381
ASHGA5P021848	7.55973e-05	0.00371223	3.98645	down	protein_coding	NM_001159770	CCDS54160.1	SLC39A11	RefSeq	2799	chr17	-	70642084	71088853		TGAACTTTCCATCCGGATAGGTAGAGCTGGGCTTCTTTCAGACAAGAGTGAGAATGGTGA	201266	Hs.221127	GO:0006829|GO:0016021|GO:0046873	zinc transporter ZIP11 isoform 1	5	30.5034	2.45604	4.45115	5	5	5	30.3232	25.7599	35.4271	2.46913	2.40305	2.49594	4.37529	4.29857	4.67958
ASHGA5P014229	0.00765766	0.0367738	2.28661	down	protein_coding	NM_032173	CCDS42999.1	ZNRF3	RefSeq	6489	chr22	+	29313376	29453476		TTTCAACAAGATGCACCCACTGGGCCTATGTAATAACAATGACGAAGAGGACTTGTATGA	84133	Hs.732114	GO:0004842|GO:0005109|GO:0005515|GO:0005887|GO:0006511|GO:0008270|GO:0016055|GO:0016567|GO:0038018|GO:0072089|GO:0090090|GO:2000051	E3 ubiquitin-protein ligase ZNRF3 isoform 2	5	18.7202	2.45604	3.64925	5	5	5	18.3343	13.3951	24.4312	2.46913	2.40305	2.49594	3.56936	3.28186	4.09654
ASHGA5P046105	0.0163596	0.059497	2.51232	down	protein_coding	NM_016378	CCDS35200.1	VCX2	RefSeq	817	chrX	-	8137984	8139308	ENST00000381059, ENST00000381089, NM_001001888	AGAGATCTCACCAGCGGGGTGCTTGCCATTCTGAAGATAATAAAATGAATGTGTTGCAAA	51480	Hs.279737	GO:0003674|GO:0005575|GO:0008150	variable charge X-linked protein 2	6.39432	28.6362	3.02626	4.35528	7.27344	6.90953	5	28.6905	32.1509	25.0672	3.52743	3.05539	2.49594	4.28905	4.64155	4.13523
ASHGA5P053543	0.000247983	0.00617344	3.5328	down	protein_coding	NM_006438	CCDS6327.1	COLEC10	RefSeq	1708	chr8	+	120079423	120119202		AAGCTGTTTATTTGGCATTTCTGGGAGACCCTTTTCTGAGGAACCACAGCAATGAATGGC	10584	Hs.176615	GO:0005537|GO:0005581|GO:0005737	collectin-10 precursor	5	27.2031	2.45604	4.27686	5	5	5	24.8071	30.3536	26.4487	2.46913	2.40305	2.49594	4.05741	4.5507	4.22246
ASHGA5P042808	0.0208451	0.0699312	2.37066	down	protein_coding	NM_032522	CCDS1312.1	ZBTB37	RefSeq	1386	chr1	+	173837492	173842778		GGATTTAGAACTGCTTTGGTGGTTGGAGGAATTGCTACTGTGTATGAATAGAAAATAATG	84614	Hs.668497	GO:0003677|GO:0005634|GO:0006351|GO:0006355|GO:0008270	zinc finger and BTB domain-containing protein 37 isoform b	45.3049	160.713	5.75072	6.99601	59.9203	51.1922	24.8021	144.948	176.96	160.231	6.30962	5.66363	5.27891	6.76315	7.2797	6.94517
ASHGA5P002625	0.00500577	0.0286203	2.93969	down	protein_coding	NM_006745	CCDS3809.1	MSMO1	RefSeq	2241	chr4	+	166248817	166264314		GGCCGTTCAGAATTATAAGGCTGTCTGCAGAGATTTGAAAAATGGCAACAAATGAAAGTG	6307	Hs.105269	GO:0000254|GO:0005506|GO:0005783|GO:0005789|GO:0005886|GO:0006631|GO:0006633|GO:0006695|GO:0008202|GO:0016021|GO:0044281	methylsterol monooxygenase 1 isoform 1	31.3565	151.476	5.33458	6.89025	23.1397	39.9212	31.0086	160.278	177.181	116.969	5.06575	5.34929	5.58872	6.91561	7.28111	6.47403
ASHGA5P004199	0.00612766	0.0322899	2.11857	down	protein_coding	NM_025151	CCDS34881.1	RAB11FIP1	RefSeq	5954	chr8	-	37716464	37757015	NM_001002814	TCAAGCCCCGACTTCATCCTGTGAAGCCAATGAATGCAATGGCCACCAAGGTTGCTAACT	80223	Hs.191179	GO:0005737|GO:0015031|GO:0030670|GO:0043231|GO:0055037	rab11 family-interacting protein 1 isoform 1	112.029	331.445	7.02002	8.1031	117.238	110.791	108.059	331.818	341.057	321.461	7.21049	6.64638	7.20317	8.03219	8.26995	8.00717
ASHGA5P045282	0.000946564	0.0116931	3.49164	down	protein_coding	NM_001007471	CCDS43835.1	TRPM3	RefSeq	6288	chr9	-	73149965	73736514		TTCAGTTTCTTGTTTTCCTGGTGGAATTTGGAAGGGGTCATGAATCAGGCTGATGCTCCT	80036	Hs.47288	GO:0005261|GO:0005262|GO:0006812|GO:0016021	transient receptor potential cation channel subfamily M member 3 isoform k	6.72171	47.2005	3.32257	5.12648	7.84861	7.00145	5.31509	54.5	46.9519	40.1495	3.63017	3.07066	3.26689	5.27262	5.23046	4.87635
ASHGA5P002368	0.005145	0.029042	2.49527	down	protein_coding	ENST00000258042	CCDS5196.1	NMBR	GENCODE	1354	chr6	-	142396744	142409936		CAAAAAACAGATGGAAACACGGAAACGCCTGGCTAAAATTGTGCTTGTCTTTGTGGGCTG	4829	Hs.654478	GO:0007186|GO:0007200|GO:0031989|GO:0016021|GO:0005737|GO:0005886|GO:0005887|GO:0004946	neuromedin B receptor [Source:HGNC Symbol;Acc:7843]	6.95128	35.5717	3.38013	4.69932	6.79986	6.69127	7.36271	31.6635	38.3873	36.6642	3.44535	3.01748	3.67756	4.44395	4.91784	4.73618
ASHGA5P003285	0.000469176	0.00831057	2.74268	down	protein_coding	NM_020369	CCDS34746.1	FSCN3	RefSeq	1911	chr7	+	127233688	127241851		CACTTCCAGGCACAGGGGGGATCCTTCTGGTCAATAACATCCTTTGGCACCTTTCGCCCT	29999	Hs.712692	GO:0005737|GO:0005856|GO:0015629|GO:0030674|GO:0051015	fascin-3	13.6558	67.0574	4.21003	5.66562	13.6785	18.2278	9.06094	71.7309	63.7669	65.6744	4.36499	4.32652	3.93858	5.68487	5.7007	5.61129
ASHGA5P001324	0.0320682	0.0935467	2.01088	down	protein_coding	NM_005888	CCDS9066.1	SLC25A3	RefSeq	1688	chr12	+	98987402	98995778		GCCGTGGAAGAGCAGTATAGCTGTGACTATGGATCTGGCAGATTCTTTATCCTTTGTGGA	5250	Hs.290404	GO:0005739|GO:0005743|GO:0005887|GO:0006091|GO:0006810|GO:0015293|GO:0015320	phosphate carrier protein, mitochondrial isoform a precursor	119.89	325.591	7.02729	8.03511	77.4487	172.955	109.266	395.515	343.876	237.384	6.65237	7.2132	7.21628	8.29017	8.27961	7.53555
ASHGA5P054601	0.000330056	0.00699759	5.79872	down	protein_coding	NM_001112704	CCDS44483.1	VAX1	RefSeq	1968	chr10	-	118892800	118897812		GCCGAGAAAAAAGCGCTGGACTGATTTTAAGTGTTTCCCTGTATTTATATTTATAGTATC	11023	Hs.441536	GO:0000122|GO:0000976|GO:0001764|GO:0003700|GO:0005634|GO:0006351|GO:0007406|GO:0007411|GO:0007420|GO:0031490|GO:0043010|GO:0060021	ventral anterior homeobox 1 isoform a	5.72763	50.0707	2.68802	5.22375	5	7.1829	5	50.7679	52.0545	47.3897	2.46913	3.09898	2.49594	5.167	5.38413	5.12012
ASHGA5P055435	0.0351771	0.0993959	2.59475	down	protein_coding	NM_001098620	CCDS44903.1	PCBP2	RefSeq	3082	chr12	+	53845885	53874946	NM_001128911, NM_001128912, NM_001128913, NM_001128914, NM_005016, NM_031989	TCCAGCTCCCCAGAACACTGCTCGACATGGACACCGGTGTGATTGAAGGTGGATTAAATG	5094	Hs.546271	GO:0000398|GO:0003677|GO:0003723|GO:0005515|GO:0005634|GO:0005634|GO:0005654|GO:0005730|GO:0005737|GO:0005737|GO:0005829|GO:0008380|GO:0009615|GO:0010467|GO:0016071|GO:0019899|GO:0030529|GO:0031625|GO:0032480|GO:0043161|GO:0045087|GO:0050687	poly(rC)-binding protein 2 isoform c	412.876	1154.36	8.52171	9.89731	333.23	723.514	181.885	960.055	886.102	1616.93	8.56399	9.12862	7.87252	9.61904	9.68219	10.3907
ASHGA5P019774	0.0135671	0.0529312	3.06146	down	protein_coding	NM_001161429	CCDS54843.1	RANBP3L	RefSeq	2635	chr5	-	36249103	36302011		TACAGATTCTCAGTCCCAGGGAGTGTCAACCTTGTCTCAGAAGCAAATGAGATGTTCATC	202151	Hs.729817	GO:0005622|GO:0046907	ran-binding protein 3-like isoform 1	5	24.8908	2.45604	4.07026	5	5	5	21.2258	36.0494	17.3973	2.46913	2.40305	2.49594	3.8085	4.82324	3.57904
ASHGA5P008849	0.0017796	0.0160435	2.07703	down	protein_coding	NM_007328	CCDS8626.1	KLRC1	RefSeq	1389	chr12	-	10598637	10605979	NM_213657	GTTATTCCCTCACGTCATTGTGGCCATTGTCCTGAGGAGTGGATTACATATTCCAACAGT	3821	Hs.512576	GO:0004888|GO:0005886|GO:0005887|GO:0007166|GO:0030246|GO:0050776	NKG2-A/NKG2-B type II integral membrane protein isoform NKG2-B	19.1176	68.808	4.65284	5.70736	13.7918	26.8824	16.6786	71.7744	65.7958	68.8539	4.37641	4.83918	4.74294	5.68592	5.74912	5.68706
ASHGA5P003409	0.0295995	0.0884708	2.34205	down	protein_coding	NM_006305	CCDS45292.1	ANP32A	RefSeq	2479	chr15	-	69070874	69113261	ENST00000560832, NR_003144	GAGCTTGGTGAAGAAGAAAGGGGTCAGAAGCGAAAACGAGAACCTGAAGATGAGGGAGAA	8125	Hs.458747	GO:0005515|GO:0005634|GO:0005654|GO:0005737|GO:0005783|GO:0006351|GO:0006355|GO:0006913|GO:0006913|GO:0008022|GO:0010467|GO:0016070|GO:0016071|GO:0016363|GO:0035556|GO:0048471|GO:0050839	acidic leucine-rich nuclear phosphoprotein 32 family member A	2885.98	7525.95	11.3958	12.6236	2399.29	4343.93	1914.73	6607.11	5261.83	10708.9	11.283	11.7704	11.134	12.4413	12.1888	13.2406
ASHGA5P003850	5.13062e-05	0.00314087	2.53734	down	protein_coding	NM_001001390	CCDS31456.1	CD44	RefSeq	5001	chr11	+	35160416	35253949		GAATCCCTGCTACCAATATGGACTCCAGTCATAGTATAACGCTTCAGCCTACTGCAAATC	960	Hs.502328	GO:0001658|GO:0002246|GO:0004415|GO:0004888|GO:0005515|GO:0005518|GO:0005540|GO:0005540|GO:0005886|GO:0005887|GO:0005975|GO:0007160|GO:0009897|GO:0009986|GO:0010628|GO:0016055|GO:0016323|GO:0016337|GO:0019221|GO:0030203|GO:0030212|GO:0030214|GO:0030214|GO:0033138|GO:0034116|GO:0043066|GO:0043066|GO:0043154|GO:0043518|GO:0044281|GO:0044344|GO:0050731|GO:0051216|GO:0060333|GO:0060442|GO:0070374|GO:…	CD44 antigen isoform 3 precursor	20.6595	91.0813	4.78586	6.12918	18.4889	26.595	16.8947	102.885	85.5212	84.8377	4.77185	4.82417	4.76155	6.2348	6.15693	5.99579
ASHGA5P001087	0.000128063	0.00463559	2.11009	down	protein_coding	NM_001165257	CCDS53947.1	SCG3	RefSeq	3313	chr15	+	51973549	52013223	ENST00000220478	CTTTTCCCAGCACCATCAGAGAAGAGTCATGAAGAAACAGACAGTACCAAGGAAGAAGCA	29106	Hs.232618	GO:0002576|GO:0005576|GO:0007596|GO:0030141|GO:0030168|GO:0030658	secretogranin-3 isoform 2	17.3668	66.41	4.57474	5.65205	17.0699	19.805	15.2255	70.5607	62.9776	65.6915	4.66589	4.43542	4.62292	5.66161	5.68259	5.61193
ASHGA5P010084	0.0158484	0.0581663	2.22801	down	protein_coding	NM_213658	CCDS8625.1	KLRC1	RefSeq	1617	chr12	-	10598637	10607215	NM_002259	GTTATTCCCTCTACATTAATACAGAGGCACAACAATTCTTCCCTGAATACAAGAACTCAG	3821	Hs.512576	GO:0004888|GO:0005886|GO:0005887|GO:0007166|GO:0030246|GO:0050776	NKG2-A/NKG2-B type II integral membrane protein isoform NKG2-A	37.7075	127.621	5.48473	6.64048	37.0412	56.3455	19.7357	143.206	130.169	109.486	5.68487	5.78999	4.97932	6.74721	6.79911	6.37513
ASHGA5P048926	0.0399345	0.108076	2.55882	down	protein_coding	NM_005587	CCDS45362.1	MEF2A	RefSeq	5569	chr15	+	100106132	100256629		AGCCCAGACCCTGATACTTCATATGTGCTAACTCCACATACAGAAGAAAAATATAAAAAA	4205	Hs.268675	GO:0000002|GO:0000122|GO:0000165|GO:0000790|GO:0000977|GO:0000981|GO:0001077|GO:0001085|GO:0001105|GO:0002224|GO:0002755|GO:0002756|GO:0003682|GO:0003700|GO:0003705|GO:0005515|GO:0005515|GO:0005634|GO:0005654|GO:0006351|GO:0006366|GO:0006915|GO:0007507|GO:0007517|GO:0008063|GO:0019901|GO:0033613|GO:0034130|GO:0034134|GO:0034138|GO:0034142|GO:0035035|GO:0035666|GO:0042692|GO:0042826|GO:0043565|GO:…	myocyte-specific enhancer factor 2A isoform 1	261.016	752.329	7.95248	9.30796	305.141	371.54	106.366	824.581	865.317	567.088	8.44599	8.23085	7.18061	9.39609	9.64877	8.87902
ASHGA5P009932	0.0225512	0.0735817	2.01137	down	protein_coding	ENST00000358130	CCDS14448.1	HMGN5	GENCODE	2126	chrX	-	80369199	80457441		GCTGCAGGTCAAGGTGATATGAGGCAGGAGCCAAAGAGAAGATCTGCCAGGTTGTCTGCT	79366	Hs.282204	GO:0006351|GO:0045893|GO:0006355|GO:0006357|GO:0016568|GO:0005634|GO:0005730|GO:0043231|GO:0005654|GO:0000785|GO:0003677|GO:0003682|GO:0031492	high mobility group nucleosome binding domain 5 [Source:HGNC Symbol;Acc:8013]	128.232	354.018	7.14099	8.14916	126.126	173.185	85.3864	345.965	240.512	475.576	7.30137	7.21518	6.90641	8.09947	7.73931	8.60871
ASHGA5P044323	0.000174845	0.00526235	2.48462	down	protein_coding	ENST00000260126	CCDS6205.1	SLCO5A1	GENCODE	3790	chr8	-	70584567	70747299	NM_001146008	TAACTGCTTTCATTACCTTCATTCCCAAGTTCATCGAGTCACAGTTTGGTATCCCAGCCT	81796	Hs.443609	GO:0055085|GO:0006810|GO:0016021|GO:0005886|GO:0016020|GO:0005215	solute carrier organic anion transporter family, member 5A1 [Source:HGNC Symbol;Acc:19046]	15.1621	67.1761	4.35841	5.67144	13.798	20.3877	11.3008	64.9927	65.7138	70.822	4.37657	4.47114	4.22754	5.53848	5.74731	5.72854
ASHGA5P003312	0.00155866	0.01507	2.76989	down	protein_coding	NM_003015	CCDS7472.1	SFRP5	RefSeq	1883	chr10	-	99526507	99531756		ATGTGCTCCAGTGACTTTGTGGTCAAAATGCGCATCAAGGAGATCAAGATAGAGAATGGG	6425	Hs.279565	GO:0001944|GO:0005615|GO:0005737|GO:0005886|GO:0006915|GO:0007163|GO:0007165|GO:0007420|GO:0007601|GO:0008285|GO:0008406|GO:0009653|GO:0009790|GO:0017147|GO:0030154|GO:0030165|GO:0035414|GO:0042813|GO:0042995|GO:0043433|GO:0043508|GO:0048546|GO:0051898|GO:0060028|GO:0090090|GO:0090179|GO:2000041|GO:2000057	secreted frizzled-related protein 5 precursor	5.56092	24.6644	2.66054	4.13037	5	6.68277	5	25.8048	25.0771	23.1114	2.46913	3.01655	2.49594	4.11766	4.25923	4.01421
ASHGA5P002293	0.00117642	0.0130171	3.43784	down	protein_coding	NM_013409	CCDS3959.1	FST	RefSeq	1834	chr5	+	52776263	52782304		CACTCCGGATCTTGCAACTCCATTTCGGAAGACACCGAGGAAGAGGAGGAAGATGAAGAC	10468	Hs.9914	GO:0000122|GO:0002244|GO:0004871|GO:0005515|GO:0005576|GO:0007165|GO:0032926|GO:0046882|GO:0048185|GO:0051798	follistatin isoform FST344 precursor	225.716	966.321	7.90419	9.68569	177.667	260.146	239.333	896.965	1096.38	905.614	7.73557	7.74758	8.2294	9.52696	9.96893	9.56117
ASHGA5P003772	0.000234252	0.0060197	3.38739	down	protein_coding	NM_001031705	CCDS35400.1	CXorf48	RefSeq	1901	chrX	-	134290460	134305751		TTTATTTGGAGAGCGATTTCTATCACCCCAGTGCATAAATCCAGCAGCGGATTCCAGGAT	54967	Hs.272804		uncharacterized protein CXorf48 isoform 1 precursor	5.07508	28.1812	2.57335	4.33352	5	5.22523	5	25.921	28.9983	29.6243	2.46913	2.75496	2.49594	4.12438	4.47791	4.39827
ASHGA5P029416	8.09865e-05	0.00382669	2.19827	down	protein_coding	ENST00000285600	CCDS32025.1	OR4K1	GENCODE	1076	chr14	+	20403766	20404842		ATCCTGAATTAGAATGAAGACCCTCCAGTGTATCATAGTGTCATGCCAACCATCTTTGCC	79544	Hs.554584	GO:0007186|GO:0016021|GO:0005886|GO:0004930|GO:0004984	olfactory receptor, family 4, subfamily K, member 1 [Source:HGNC Symbol;Acc:14726]	18.1743	71.3858	4.62758	5.76395	16.223	21.8354	16.4645	78.2295	67.7389	68.189	4.59805	4.55919	4.72549	5.82684	5.79475	5.67025
ASHGA5P001028	4.16683e-05	0.00291494	2.95892	down	protein_coding	NM_001142447	CCDS48158.1	ATP1B4	RefSeq	4773	chrX	+	119495939	119517104		TCAGAGTTGGAGCCTGATCTTACTCATTTACTTCTTCTTCTATGCCTCCTTGGCTGCTGT	23439	Hs.292599	GO:0000785|GO:0005637|GO:0005887|GO:0006351|GO:0006355|GO:0006810|GO:0015077|GO:0015672|GO:0046034	protein ATP1B4 isoform A	26.7695	131.184	5.122	6.68707	22.8965	35.7148	21.6973	138.235	130.533	124.783	5.0519	5.20528	5.10882	6.68865	6.80257	6.57
ASHGA5P005124	0.00555814	0.0304542	4.05152	down	protein_coding	ENST00000301480	CCDS12214.1	ZNF560	GENCODE	2802	chr19	-	9577030	9609279		GCCAAAGTAGGATTTCAGCTCTTTAAACCCAGTGTCATCTCTTGGTTGGAAGAAGAAGAG	147741	Hs.631613	GO:0006351|GO:0006355|GO:0005634|GO:0005622|GO:0003677|GO:0008270|GO:0003676	zinc finger protein 560 [Source:HGNC Symbol;Acc:26484]	7.1492	49.2783	3.18167	5.20013	5	9.54008	6.90753	45.6785	50.0006	52.1559	2.46913	3.47571	3.60016	5.00607	5.32433	5.26998
ASHGA5P053847	0.00257664	0.0199646	2.04974	down	protein_coding	NM_001122821	CCDS48037.1	SET	RefSeq	2863	chr9	+	131445933	131458675		TCATGTAAATATCCCTTCCAGGCAGGGCGGCTCCAGTGCAGATTTAAGCCGCTGGCACCT	6418	Hs.436687	GO:0003677|GO:0004864|GO:0005515|GO:0005634|GO:0005654|GO:0005737|GO:0005783|GO:0005829|GO:0006260|GO:0006334|GO:0006337|GO:0006913|GO:0008601|GO:0010467|GO:0016070|GO:0016071|GO:0035067|GO:0042393|GO:0043234|GO:0043524|GO:0045892|GO:0048471	protein SET isoform 1	69.2761	210.684	6.36448	7.39992	62.5275	89.3393	55.9615	180.57	213.268	238.214	6.37188	6.37657	6.34499	7.092	7.56697	7.54078
ASHGA5P017337	0.013355	0.0523682	2.05838	down	protein_coding	NM_001142596	CCDS44432.1	P4HA1	RefSeq	2806	chr10	-	74766979	74856732		GGAATTACAGAAAGATGAGCCAGATGCTTTCAAAGAGCTGGGGACAGGAAATAGAATTGC	5033	Hs.500047	GO:0004656|GO:0005506|GO:0005739|GO:0005783|GO:0005788|GO:0016702|GO:0018401|GO:0030199|GO:0031418|GO:0043231	prolyl 4-hydroxylase subunit alpha-1 isoform 3 precursor	251.354	643.026	8.02353	9.06504	222.308	340.295	191.459	807.579	653.317	468.182	8.02609	8.10048	7.94401	9.36446	9.24455	8.58611
ASHGA5P012182	0.00163423	0.0153445	2.2626	down	protein_coding	NM_001010909	CCDS34388.1	MUC21	RefSeq	3656	chr6	+	30951484	30957675		TTTAGAAGCTGCAACAAATTCCAATGAGACTAGCACCTCTGCCAACACTGGATCCAGTGT	394263	Hs.448277	GO:0005796|GO:0005886|GO:0016021|GO:0016266|GO:0043687|GO:0044267	mucin-21 precursor	17.2247	68.11	4.5134	5.69137	17.0918	23.303	11.2794	66.6946	64.9934	72.6419	4.66791	4.64771	4.22457	5.57745	5.73153	5.76514
ASHGA5P004929	0.0453766	0.117704	2.41947	down	protein_coding	NM_024944	CCDS13570.1	CHODL	RefSeq	2625	chr21	+	19617149	19639687		GTGGTCAGCGGCCAAAAGGTGTGTTTTGCTGACTTCAAGCATCCCTGCTACAAAATGGCC	140578	Hs.283725	GO:0005540|GO:0005737|GO:0007517|GO:0016021|GO:0048471	chondrolectin isoform a precursor	8.80037	34.4937	3.3774	4.65209	9.02442	12.3767	5	36.9106	33.98	32.5905	3.81403	3.82222	2.49594	4.67609	4.72835	4.55181
ASHGA5P003504	0.0321982	0.0937614	2.00869	down	protein_coding	NM_001126112	CCDS11118.1	TP53	RefSeq	2588	chr17	-	7571719	7590868	NM_000546, NM_001126115, NM_001126118	ATTTCACCCTTCAGATCCGTGGGCGTGAGCGCTTCGAGATGTTCCGAGAGCTGAATGAGG	7157	Hs.437460	GO:0000060|GO:0000075|GO:0000122|GO:0000122|GO:0000122|GO:0000733|GO:0000785|GO:0000790|GO:0001077|GO:0001085|GO:0001228|GO:0001701|GO:0001756|GO:0001836|GO:0002020|GO:0002039|GO:0002309|GO:0002326|GO:0002360|GO:0003677|GO:0003682|GO:0003684|GO:0003700|GO:0005507|GO:0005515|GO:0005524|GO:0005634|GO:0005654|GO:0005654|GO:0005657|GO:0005669|GO:0005678|GO:0005730|GO:0005737|GO:0005739|GO:0005783|GO:…	cellular tumor antigen p53 isoform a	19.8666	70.5717	4.68457	5.69082	19.3592	28.1865	12.0541	65.7133	50.3187	95.6831	4.83061	4.89963	4.32346	5.55471	5.33509	6.18267
ASHGA5P048107	0.000119301	0.0044681	2.3112	down	protein_coding	ENST00000302981	CCDS31534.1	OR5AP2	GENCODE	951	chr11	-	56408964	56409915		CCTGTGCTAAATCCCCTCATCTATAGTTTAAAAAATAAGGATGTAAAAAAGGCCCTAAAG	338675	Hs.449692	GO:0007186|GO:0016021|GO:0005886|GO:0004930|GO:0004984	olfactory receptor, family 5, subfamily AP, member 2 [Source:HGNC Symbol;Acc:15258]	15.5505	65.3237	4.41841	5.62705	15.8407	18.7785	12.0324	70.0355	62.367	63.5685	4.5651	4.36888	4.32124	5.65177	5.66636	5.563
ASHGA5P052749	3.33178e-05	0.00270676	4.28916	down	protein_coding	NM_005588	CCDS4918.1	MEP1A	RefSeq	2947	chr6	+	46761093	46807519		AATCAGCTCACTTGCAGCAATGGCTTGGATTAGATCCACTTGCATTCTCTTTTTTACCTT	4224	Hs.179704	GO:0004222|GO:0005615|GO:0005887|GO:0006508|GO:0007586|GO:0008270|GO:0017090	meprin A subunit alpha precursor	5	32.5941	2.45604	4.55674	5	5	5	36.2596	32.626	28.8966	2.46913	2.40305	2.49594	4.64702	4.6634	4.35979
ASHGA5P012513	0.00501737	0.0286213	3.73031	down	protein_coding	NM_001242815		C2orf91	RefSeq	3721	chr2	-	42162507	42180943		TTACATGTCAGGTTCCACCTGAATTCCTTCCATGCTTTTCAGCGACTGAACCATTTGGGT	400950	Hs.738713		uncharacterized protein C2orf91	6.6257	42.2915	3.06749	4.96678	7.83959	7.03752	5	42.4945	44.6254	39.7547	3.62862	3.0779	2.49594	4.89135	5.14928	4.85972
ASHGA5P049831	0.00934161	0.0418735	2.99558	down	protein_coding	NM_012121	CCDS11695.1	CDC42EP4	RefSeq	3121	chr17	-	71279762	71308143		TTCTTCATCTTCCAAACGCAGTCTCCTGTCCAGGAAGTTCCGGGGCAGCAAGCGGTCACA	23580	Hs.3903	GO:0005737|GO:0007266|GO:0008360|GO:0012505|GO:0015629|GO:0015630|GO:0016020|GO:0017049|GO:0031274	cdc42 effector protein 4	8.3544	48.0919	3.57681	5.15965	6.16647	7.78096	11.1158	44.1282	51.1349	49.0126	3.32472	3.20084	4.20487	4.95183	5.35776	5.16936
ASHGA5P008841	0.0198002	0.0676708	2.30334	down	protein_coding	NM_080682	CCDS774.1	VCAM1	RefSeq	2944	chr1	+	101185195	101204601		TAATTGTTCAAGCATTCCCTAGAGATCCAGAAATCGAGATGAGTGGTGGCCTCGTGAATG	7412	Hs.109225	GO:0001666|GO:0002102|GO:0002526|GO:0002544|GO:0005178|GO:0005615|GO:0005886|GO:0005902|GO:0007155|GO:0007157|GO:0007159|GO:0007507|GO:0007568|GO:0007584|GO:0009897|GO:0009986|GO:0010212|GO:0016021|GO:0019048|GO:0019221|GO:0022614|GO:0030175|GO:0030183|GO:0042102|GO:0042383|GO:0045177|GO:0050776|GO:0050839|GO:0050839|GO:0050901|GO:0060333|GO:0060710|GO:0071065|GO:0071333	vascular cell adhesion protein 1 isoform b precursor	6.36082	22.7195	2.79393	3.99765	5	9.08245	5	21.7571	21.9685	24.4329	2.46913	3.41671	2.49594	3.85179	4.0445	4.09666
ASHGA5P020807	0.00458411	0.0271108	2.10434	down	protein_coding	NM_001172087	CCDS6221.1	PEX2	RefSeq	4243	chr8	-	77892493	77913280		TTTCGCAGACTCCTAAGAGACCTTCAGAGAAGACATGGCTTCCAGAAAAGAGAATGCGAA	5828	Hs.437966	GO:0000122|GO:0001764|GO:0005515|GO:0005778|GO:0005779|GO:0006635|GO:0006699|GO:0007031|GO:0008270|GO:0016558|GO:0016593|GO:0031648|GO:0042632|GO:0045540|GO:0048147|GO:0050680	peroxisomal biogenesis factor 2	218.845	559.874	7.81083	8.88419	150.939	328.925	176.672	633.39	553.38	492.851	7.53598	8.05875	7.83775	9.0066	8.98128	8.66471
ASHGA5P011305	0.00275681	0.0207939	2.06608	down	protein_coding	NM_012152	CCDS700.1	LPAR3	RefSeq	1738	chr1	-	85279085	85358896		AACGTGAGCGGATGTTCACTTCTCCACAATGAATGAGTGTCACTATGACAAGCACATGGA	23566	Hs.674915	GO:0000187|GO:0001965|GO:0004930|GO:0005543|GO:0005886|GO:0005886|GO:0005887|GO:0007187|GO:0007204|GO:0007268|GO:0008289|GO:0032060|GO:0043231|GO:0043410|GO:0051482|GO:0051928|GO:0070915	lysophosphatidic acid receptor 3	5.39789	18.5576	2.63281	3.67971	5	6.19367	5	20.0503	16.2644	19.3581	2.46913	2.93337	2.49594	3.71654	3.57811	3.74449
ASHGA5P012835	0.0419018	0.111556	2.14143	down	protein_coding	NM_197941	CCDS3983.2	ADAMTS6	RefSeq	7289	chr5	-	64444562	64777704		TGTGCTGGAGGTGTCCAAAGACAGGAGGTGGTCTGTAAAAGGTTGGATGACAACTCCATT	11174	Hs.482291	GO:0004222|GO:0005578|GO:0006508|GO:0008237|GO:0008270	A disintegrin and metalloproteinase with thrombospondin motifs 6 preproprotein	6.80859	22.0142	2.85432	3.95289	5	10.4258	5	23.4053	20.9292	21.7081	2.46913	3.59788	2.49594	3.96348	3.9732	3.922
ASHGA5P054684	0.012179	0.0492365	4.56411	down	protein_coding	ENST00000380378	CCDS31363.1	OR51T1	GENCODE	1065	chr11	+	4903048	4904113		AGTTCAGTGTCTTCAACCAACCATGGCAATATTCAATAACACCACTTCGTCTTCCTCAAA	401665	Hs.553804	GO:0007186|GO:0016021|GO:0005886|GO:0004930|GO:0004984	olfactory receptor, family 51, subfamily T, member 1 [Source:HGNC Symbol;Acc:15205]	8.02762	48.5205	2.98552	5.17585	5	14.0829	5	49.6412	45.1581	50.7621	2.46913	3.99149	2.49594	5.13235	5.16881	5.2264
ASHGA5P010990	0.0179908	0.0635783	2.44856	down	protein_coding	NM_016262	CCDS5100.1	TUBE1	RefSeq	2314	chr6	-	112391859	112408751		ACCTAACGAGCTCTGCAAGATTTGAAGGGTCCCTTAATATGGACCTTAATGAAATCAGCA	51175	Hs.34851	GO:0000242|GO:0003924|GO:0005200|GO:0005525|GO:0005874|GO:0007018|GO:0007098|GO:0051258	tubulin epsilon chain	374.317	1113.31	8.54106	9.83299	258.144	528.283	336.522	1379.59	1229.53	730.793	8.22992	8.693	8.70025	10.1296	10.1271	9.2423
ASHGA5P008932	0.00302278	0.0217808	2.32941	down	protein_coding	NM_016836	CCDS2213.1	RBMS1	RefSeq	4305	chr2	-	161128661	161350318	NM_002897	GTACGCCACCTACTATTACCCCCAGTATCTGCAAGCCAAGCAGTCTCTGGTCCCAGCCCA	5937	Hs.470412	GO:0000166|GO:0003690|GO:0003697|GO:0003723|GO:0005515|GO:0005634|GO:0006260|GO:0006396	RNA-binding motif, single-stranded-interacting protein 1 isoform a	91.3788	290.422	6.66739	7.88736	64.3187	138.438	71.3794	348.245	256.025	266.995	6.40944	6.93099	6.66175	8.10811	7.83775	7.71621
ASHGA5P006163	0.00440227	0.0265458	3.47524	down	protein_coding	NM_003984	CCDS11231.1	SLC13A2	RefSeq	2384	chr17	+	26800663	26824798	NM_001145975	CCCCAGTAAGGAGGCCTACTGCGCGTATGCCATCATCCTCATGGCGCTCTTCTGGTGCAC	9058	Hs.102307	GO:0005886|GO:0005887|GO:0006810|GO:0015361|GO:0016020|GO:0055085	solute carrier family 13 member 2 isoform b	6.44125	39.4095	3.06452	4.86163	5	7.98227	6.34148	39.577	39.0207	39.6309	2.46913	3.23519	3.48925	4.78583	4.94393	4.85514
ASHGA5P013786	0.0390785	0.106479	2.48618	down	protein_coding	NM_001184832	CCDS53940.1	SLC12A1	RefSeq	4717	chr15	+	48498497	48596275		AAGCTGGAATTGGTCTTGGAGTCATCATCATTGGCCTAAGTGTGGTAGTAACGACACTCA	6557	Hs.123116	GO:0005886|GO:0006810|GO:0006811|GO:0006813|GO:0006814|GO:0008511|GO:0016020|GO:0016021|GO:0034220|GO:0055085	solute carrier family 12 member 1 isoform F	8.11269	32.1564	3.21839	4.53232	5.52932	13.8087	5	37.2758	30.0112	29.1823	3.19156	3.96767	2.49594	4.69146	4.53035	4.37516
ASHGA5P007450	0.00317782	0.0224671	3.15703	down	protein_coding	NM_001042771	CCDS359.1	LCK	RefSeq	2118	chr1	+	32739711	32751766		TTTCTGTGGCTGGTGAATGGGGATCCCAGGATCTCACAATCTCAGGGACCATGGGCTGTG	3932	Hs.470627	GO:0000242|GO:0000242|GO:0001772|GO:0001948|GO:0004713|GO:0004713|GO:0004713|GO:0004713|GO:0004715|GO:0004722|GO:0004722|GO:0005515|GO:0005524|GO:0005829|GO:0005886|GO:0006468|GO:0006882|GO:0006882|GO:0006917|GO:0006917|GO:0006919|GO:0006919|GO:0007596|GO:0008022|GO:0016032|GO:0019048|GO:0019901|GO:0030097|GO:0030168|GO:0030217|GO:0030217|GO:0031295|GO:0042169|GO:0042169|GO:0042493|GO:0042493|GO:…	tyrosine-protein kinase Lck precursor	5.79698	28.7452	2.70002	4.35858	5	7.39095	5	31.4106	30.6557	24.1694	2.46913	3.13498	2.49594	4.42913	4.56784	4.07879
ASHGA5P003561	0.00220572	0.0182285	2.34885	down	protein_coding	NM_018242	CCDS11209.1	SLC47A1	RefSeq	3279	chr17	+	19437166	19482346		ATCTGTTTCTCCATCAACTGCATCTTGGGGTGATAGGCTCTGCACTGGCAAACTTGATTT	55244	Hs.232054	GO:0005451|GO:0005886|GO:0015238|GO:0015695|GO:0016021|GO:0055085	multidrug and toxin extrusion protein 1	25.4991	98.7237	5.01969	6.25165	17.5708	37.8546	21.0717	110.414	92.5809	93.1765	4.70902	5.27891	5.07115	6.33495	6.27962	6.14038
ASHGA5P031557	0.00967324	0.0427569	2.20259	down	protein_coding	NM_001142469	CCDS45422.1	C16orf45	RefSeq	2053	chr16	+	15596122	15682116		TAACAATCATAGCCAGGATGTGAAGCCTGTCAGTTTCCTCAGCCGCAAATTCTTCCATGT	89927	Hs.401798		uncharacterized protein C16orf45 isoform 2	20.5296	76.3909	4.72849	5.86769	23.6967	26.1833	11.7087	84.7179	71.3951	73.0596	5.09848	4.80725	4.27974	5.95133	5.87789	5.77386
ASHGA5P045388	0.0147948	0.0559018	2.18186	down	protein_coding	NM_014334	CCDS35098.1	FRRS1L	RefSeq	1189	chr9	-	111899580	111929571		AGTTTTTGAGAACAATCGCGTCACCTGCAGATTTAAACGCCCTGTGAATGTTCCCAGAGA	23732	Hs.347537	GO:0003674|GO:0005575|GO:0008150|GO:0016021	DOMON domain-containing protein FRRS1L	9.4387	38.4868	3.69784	4.8234	10.7288	12.5412	5.04609	35.6325	40.3097	39.5181	4.04497	3.84058	3.20797	4.62367	4.99553	4.851
ASHGA5P002939	0.0329336	0.095118	2.40062	down	protein_coding	NM_018084	CCDS33203.1	CCDC88A	RefSeq	9746	chr2	-	55514977	55647057		TTCAAACTCTTTAGAAGATGGCCAGACCTTGGGGACCAAGAAAAGCAGCACCATGAATGA	55704	Hs.292925	GO:0000226|GO:0001932|GO:0003779|GO:0005783|GO:0005794|GO:0005829|GO:0005886|GO:0006260|GO:0006275|GO:0008017|GO:0010975|GO:0016020|GO:0016023|GO:0016044|GO:0016477|GO:0030027|GO:0030032|GO:0031410|GO:0031929|GO:0032148|GO:0032956|GO:0035091|GO:0042127|GO:0042803|GO:0043422	girdin isoform 2	239.238	643.031	7.81213	9.07554	119.894	432.058	165.761	808.653	609.887	510.552	7.23838	8.43403	7.76398	9.36694	9.14225	8.71742
ASHGA5P007280	0.00417645	0.0257572	2.16325	down	protein_coding	NM_001127362	CCDS44953.1	NR2C1	RefSeq	2147	chr12	-	95424184	95467404		CTTCAACAAGATGCCAAGGTAATTGCAGCCCTCATTCATTTCACAAGACGAGCAATCACT	7181	Hs.108301	GO:0000122|GO:0003677|GO:0003700|GO:0003707|GO:0004872|GO:0005515|GO:0005654|GO:0006367|GO:0008270|GO:0010467|GO:0016605|GO:0042803|GO:0042826|GO:0043565|GO:0048386	nuclear receptor subfamily 2 group C member 1 isoform c	293.781	777.839	8.25929	9.37249	313.509	326.064	241.77	871.104	807.914	654.498	8.483	8.04748	8.24739	9.48131	9.54405	9.09211
ASHGA5P048606	0.00350932	0.0236014	2.56114	down	protein_coding	NM_012125	CCDS10031.1	CHRM5	RefSeq	3055	chr15	+	34261088	34357287		AGCAAGCTACCCTGAAAAGTCAACAACTCCTCTCGAAAGAACAATGACCACAGTCAACAT	1133	Hs.584747	GO:0004435|GO:0005886|GO:0005887|GO:0007197|GO:0007213|GO:0008283|GO:0015872|GO:0016907|GO:0030054|GO:0045211|GO:0060304	muscarinic acetylcholine receptor M5	9.52557	47.6369	3.78598	5.14277	9.20543	9.16892	10.2023	54.7775	46.2892	41.8438	3.83604	3.42797	4.09393	5.2816	5.20745	4.93925
ASHGA5P050691	3.23284e-06	0.00162469	2.57878	down	protein_coding	NM_182976	CCDS727.1	ZNF326	RefSeq	2729	chr1	+	90460677	90494094		AGAATTACTCTTCCTACAGCAGTTTTTCTTCACCCCATATGAAGCCTGCACCTGTAGGCT	284695	Hs.306221	GO:0000993|GO:0003677|GO:0005515|GO:0006351|GO:0006397|GO:0008270|GO:0008380|GO:0016363|GO:0032784|GO:0044609|GO:0045893	DBIRD complex subunit ZNF326 isoform 1	36.5327	151.834	5.54258	6.90927	33.8252	46.4023	29.3706	163.671	143.086	148.746	5.56476	5.54793	5.51506	6.94705	6.93951	6.84125
ASHGA5P038777	0.000132884	0.00472892	3.29746	down	protein_coding	NM_025169	CCDS2714.1	ZNF167	RefSeq	1792	chr3	+	44596712	44624973	NM_018651	ATTTTAATCGGACCAACTGCAGCTGTAACAAGCTTCTCTTTGGGGTCACAATGACCACTG	55888	Hs.529512	GO:0003677|GO:0003700|GO:0005634|GO:0006351|GO:0008270|GO:0016032	zinc finger protein 167 isoform 2	5	25.5131	2.45604	4.1774	5	5	5	28.1295	26.2494	22.1605	2.46913	2.40305	2.49594	4.2546	4.32785	3.94973
ASHGA5P042572	0.00203774	0.0173942	2.00803	down	protein_coding	NM_032194	CCDS5088.1	RPF2	RefSeq	1078	chr6	+	111303290	111346794		CTAAGCAAACTACAAACCAGGAAAATGAAGGGGTTGAAGAAGCGACCTGCAGAAAGGATA	84154	Hs.372265	GO:0005634|GO:0005730	ribosome production factor 2 homolog	13031.7	30069.3	13.6781	14.6839	13902	13175.8	12017.3	29992.2	34241.1	25974.6	13.8038	13.4532	13.7772	14.6513	14.8439	14.5563
ASHGA5P018470	0.0438815	0.115124	2.34053	down	protein_coding	NM_001110792	CCDS48193.1	MECP2	RefSeq	1734	chrX	-	153295685	153363188		AGGAGAGACTGGAAGAAAAGTCAGAAGACCAGGACCTCCAGGGCCTCAAGGACAAACCCC	4204	Hs.200716	GO:0000122|GO:0000400|GO:0000790|GO:0000792|GO:0001662|GO:0001666|GO:0001964|GO:0001976|GO:0002087|GO:0003677|GO:0003700|GO:0003714|GO:0003729|GO:0005515|GO:0005634|GO:0005829|GO:0006020|GO:0006122|GO:0006342|GO:0006349|GO:0006351|GO:0006541|GO:0007416|GO:0007585|GO:0007616|GO:0008104|GO:0008134|GO:0008211|GO:0008284|GO:0008327|GO:0008344|GO:0008542|GO:0009405|GO:0009790|GO:0009791|GO:0010385|GO:…	methyl-CpG-binding protein 2 isoform 2	57.8878	191.743	6.02292	7.24975	79.6985	67.8602	26.1047	224.916	194.834	155.478	6.68711	6.02772	5.35391	7.42646	7.42048	6.9023
ASHGA5P012838	0.00104211	0.0122126	2.18836	down	protein_coding	NM_005869	CCDS3982.2	CWC27	RefSeq	2093	chr5	+	64064754	64314590		GGAAGATCAGACCCTTGCACTGCTGAACCAGTTTAAATCTAAACTCACTCAAGCAATTGC	10283	Hs.371372	GO:0000398|GO:0003755|GO:0006457|GO:0071013	peptidyl-prolyl cis-trans isomerase CWC27 homolog	4802.16	11427.2	12.174	13.3038	4266.18	6464.45	3675.84	11490.7	10488.9	12302	12.1045	12.3746	12.0428	13.2615	13.1825	13.4675
ASHGA5P006019	0.000643358	0.00963048	2.47927	down	protein_coding	NM_005425	CCDS45410.1	TNP2	RefSeq	599	chr16	-	11361713	11363160		CGGAGCTCAGGATGGAAATCCAACTAATGAGACCGCACTCCTTGGCTTGTTCCTGCGTGT	7142	Hs.513349	GO:0000786|GO:0003677|GO:0005634|GO:0007275|GO:0007283|GO:0007339|GO:0007340|GO:0007341|GO:0008270|GO:0030154|GO:0030317	nuclear transition protein 2	29.3516	122.726	5.27235	6.58226	27.4611	33.8093	26.7846	137.118	123.332	107.727	5.29603	5.13379	5.38723	6.67588	6.71477	6.35615
ASHGA5P036538	2.78548e-05	0.00268724	5.58169	down	protein_coding	NM_000463	CCDS2510.1	UGT1A1	RefSeq	2357	chr2	+	234668918	234681945		ATCATGCCCAATATGGTTTTTGTTGGTGGAATCAACTGCCTTCACCAAAATCCACTATCC	54658	Hs.554822	GO:0001889|GO:0001972|GO:0004857|GO:0005496|GO:0005789|GO:0005887|GO:0006778|GO:0006789|GO:0006805|GO:0007584|GO:0007586|GO:0008202|GO:0008210|GO:0014070|GO:0015020|GO:0015020|GO:0017144|GO:0019899|GO:0031100|GO:0032496|GO:0042167|GO:0042493|GO:0042573|GO:0042594|GO:0042803|GO:0043086|GO:0044281|GO:0045939|GO:0046483|GO:0046982|GO:0051552|GO:0052696|GO:0052697|GO:0070069|GO:0070980|GO:0071361|GO:…	UDP-glucuronosyltransferase 1-1 precursor	5.19449	45.2946	2.59235	5.07306	5	5.58348	5	45.9573	44.1957	45.7307	2.46913	2.81199	2.49594	5.0136	5.13526	5.07031
ASHGA5P053472	0.0155314	0.0574375	2.17253	down	protein_coding	NM_014656		KIAA0040	RefSeq	4584	chr1	-	175126122	175161949	NM_001162893, NM_001162894, NM_001162895	TGGCCCTAATCTAGCCAAGCACCATGGAGAGAATCAGTGCCTTCTTCAGCTCTATCTGGG	9674	Hs.518138		uncharacterized protein KIAA0040	95.692	281.273	6.70621	7.82558	79.1192	148.684	59.2725	325.297	301.492	217.03	6.67939	7.02136	6.41788	8.00044	8.07748	7.39882
ASHGA5P033256	0.00432761	0.0262991	2.70195	down	protein_coding	ENST00000545221	CCDS32688.1	OR4D2	GENCODE	924	chr17	+	56247016	56247940		TTTTGGATAACTTCTACTGTGATGTTCCCCAAGTACTGAGACTTGCCTGCACTGACACCT	124538	Hs.446879	GO:0007186|GO:0016021|GO:0005886|GO:0004930|GO:0004984	olfactory receptor, family 4, subfamily D, member 2 [Source:HGNC Symbol;Acc:8294]	14.7369	67.921	4.25551	5.68951	8.98819	23.2723	11.9502	68.3041	65.4079	70.0508	3.80932	4.64601	4.31119	5.61379	5.74179	5.71295
ASHGA5P033268	0.00079065	0.0107459	3.27783	down	protein_coding	NM_014906	CCDS11613.1	PPM1E	RefSeq	6545	chr17	+	56833229	57062540		AGGAAAATGGAGGACAAACATGTCTGCATTCCTGACTTTAATATGCTCTTCAACCTAGAG	22843	Hs.245044	GO:0004722|GO:0005515|GO:0005634|GO:0005730|GO:0005737|GO:0006469|GO:0035690|GO:0035970|GO:0043234|GO:0046872|GO:0051496	protein phosphatase 1E	5.31812	28.0916	2.61755	4.33029	5	5.95437	5	26.1136	30.7859	27.3754	2.46913	2.88758	2.49594	4.13678	4.57564	4.27846
ASHGA5P029318	0.00177366	0.0160234	2.0071	down	protein_coding	NM_016186	CCDS9923.1	SERPINA10	RefSeq	2467	chr14	-	94749649	94759361	NM_001100607	TGACAAGAATTTTCGTTGTCATGTCCTCAAACTGCCCTACCAAGGAAATGCCACCATGCT	51156	Hs.118620	GO:0004867|GO:0005576|GO:0010951|GO:0030162|GO:0042246|GO:0060046	protein Z-dependent protease inhibitor precursor	45.9462	147.167	5.85163	6.85674	45.6566	52.7379	39.444	165.233	146.638	129.631	5.95837	5.70505	5.89146	6.9617	6.97678	6.63173
ASHGA5P034022	0.0114224	0.0472508	3.35282	down	protein_coding	NM_001005191	CCDS32901.1	OR7D4	RefSeq	1022	chr19	-	9324525	9325547		ATTCTACTGATGAAGAGGTTGACCTTCTCCACAGGCACTGAGATTCCGCATTTCTTCTGT	125958	Hs.446910	GO:0004930|GO:0004984|GO:0005886|GO:0016021	olfactory receptor 7D4	7.88355	43.3261	3.25942	5.0048	8.05096	10.5997	5	42.3776	45.9358	41.6649	3.66584	3.61648	2.49594	4.88627	5.19587	4.93225
ASHGA5P020796	0.000629405	0.00951488	3.05932	down	protein_coding	NM_016612	CCDS47828.1	SLC25A37	RefSeq	1865	chr8	+	23386362	23430063		ACGTTTTCCACCACCAAGGAAACAGCCACCTAGCCAACGGGATAGCTGGGAGTATGGCCA	51312	Hs.726050	GO:0005381|GO:0005743|GO:0016021|GO:0048250|GO:0055072	mitoferrin-1	153.631	608.275	7.40295	9.01616	123.419	192.843	144.63	644.721	652.437	527.668	7.27314	7.3459	7.58983	9.03376	9.24196	8.77277
ASHGA5P052990	0.00101839	0.0120688	2.1364	down	protein_coding	NM_001002926	CCDS34606.1	TWISTNB	RefSeq	3892	chr7	-	19735084	19748660		AGATGACACTCCAATGGAAGAGTCAGCCCTGCAGAATACTAATAATGCGAATGGCATCTG	221830	Hs.353035	GO:0003899|GO:0005634|GO:0005730|GO:0006351|GO:0015630	DNA-directed RNA polymerase I subunit RPA43	2316.34	5672.21	11.155	12.2502	2257.11	2557.29	2134.61	5637.68	6135.22	5243.74	11.2117	10.975	11.2782	12.1836	12.4259	12.1411
ASHGA5P052587	0.00203085	0.0173671	2.04144	down	protein_coding	ENST00000329474	CCDS54973.1	LRRC16A	GENCODE	5431	chr6	+	25279655	25620758		CTGCACCCAGGTCTTCCAGAGAACCGCTTTGGTTTGGGAACACCAGAAAAGAATACCAAA	55604	Hs.649550	GO:0007015|GO:0030032|GO:0031529|GO:0016477|GO:0007596|GO:0046415|GO:0005634|GO:0005737|GO:0005829|GO:0030027	leucine rich repeat containing 16A [Source:HGNC Symbol;Acc:21581]	11.7164	45.9734	4.05707	5.08666	11.7934	12.6586	10.6973	53.3071	43.938	40.6751	4.16617	3.85192	4.15311	5.23884	5.12604	4.89509
ASHGA5P037248	8.79324e-05	0.00395422	2.49091	down	protein_coding	ENST00000286808	CCDS13586.1	CLDN17	GENCODE	731	chr21	-	31538240	31538971		TACGACAATGCTTAGTAAGACCTCCACCAGTTATGTCTAATGCCTCCTTTTGGCTCCAAG	26285	Hs.258589	GO:0016338|GO:0070830|GO:0045216|GO:0034329|GO:0016021|GO:0005886|GO:0005923|GO:0016020|GO:0005794|GO:0005198|GO:0042802	claudin 17 [Source:HGNC Symbol;Acc:2038]	38.3232	153.117	5.60818	6.92485	38.2228	47.0982	29.6486	162.44	149.582	147.33	5.72916	5.56695	5.52844	6.93602	7.01269	6.82586
ASHGA5P012597	0.000738971	0.0103376	2.35745	down	protein_coding	NM_198576	CCDS30551.1	AGRN	RefSeq	7343	chr1	+	955502	991499		TATGGACTTTGACTGGTTTCCTGCGTTTATCACGGGGGCCACGTCAGGAGCCATTGCTGC	375790	Hs.273330	GO:0005200|GO:0005515|GO:0005605|GO:0005796|GO:0005886|GO:0005975|GO:0006024|GO:0006027|GO:0007165|GO:0007213|GO:0007411|GO:0030203|GO:0030204|GO:0031012|GO:0031012|GO:0031012|GO:0043113|GO:0043113|GO:0043202|GO:0043236|GO:0044281|GO:0045162|GO:0050808	agrin precursor	7.1082	33.7877	3.38422	4.62146	5.79393	9.38746	6.14322	32.0689	36.4966	32.7977	3.24975	3.45637	3.44656	4.46076	4.84309	4.56052
ASHGA5P026180	0.00153591	0.0149308	2.79912	down	protein_coding	ENST00000379829	CCDS7774.1	OR10A4	GENCODE	995	chr11	+	6897855	6898850		TGTGTTTGAACTGGAGGCTCTGACAGCCACTGTCCTATTCATTCTCTTTCCTTTCTTGCT	283297	Hs.448685	GO:0007186|GO:0016021|GO:0005886|GO:0004930|GO:0004984	olfactory receptor, family 10, subfamily A, member 4 [Source:HGNC Symbol;Acc:15130]	25.9104	119.807	5.06083	6.5458	28.269	32.4782	16.984	134.608	118.673	106.139	5.33119	5.08167	4.76961	6.64575	6.65431	6.33733
ASHGA5P011631	0.0264771	0.082161	2.329	down	protein_coding	NM_080753	CCDS13363.1	WFDC10A	RefSeq	482	chr20	+	44258384	44259831		ATACCGTGACAAGAAGAGGATGCAGAAAACACAGCTATCCCCAGAAATCAAAGTCTGCCA	140832	Hs.199380	GO:0004867|GO:0005576	WAP four-disulfide core domain protein 10A precursor	7.39731	29.3476	3.18103	4.40074	7.00765	10.1843	5	28.3184	30.7642	28.9602	3.48064	3.5665	2.49594	4.26467	4.57409	4.36345
ASHGA5P028339	4.36082e-05	0.0029626	2.17963	down	protein_coding	NM_014938		MLXIP	RefSeq	5508	chr12	+	122516651	122628967		TTCGACACGGTCAACAAACAGACGTGCCAGACCTACAGCTTCGGCAAGACTAGCTCCTGC	22877	Hs.721711	GO:0003677|GO:0005634|GO:0005741|GO:0006351|GO:0006355|GO:0046983	MLX-interacting protein	5	17.417	2.45604	3.58012	5	5	5	19.6384	15.857	16.7555	2.46913	2.40305	2.49594	3.68322	3.536	3.52115
ASHGA5P011090	0.0247998	0.0784431	2.45086	down	protein_coding	NM_020940	CCDS31290.1	FAM160B1	RefSeq	5828	chr10	+	116581502	116624474		AAGGCCCTATTATTGACCACATCACACTGCTAGAGGGTGTGATTGTGTTAGAAGAGTTCT	57700	Hs.192619		protein FAM160B1 isoform a	136.993	445.285	7.18714	8.48043	87.6813	202.326	120.972	585.812	458.426	291.617	6.80727	7.40333	7.35081	8.8838	8.70025	7.85723
ASHGA5P004606	0.0339411	0.0970022	2.57538	down	protein_coding	NM_138335	CCDS3469.1	GNPDA2	RefSeq	2313	chr4	-	44703811	44728651		ACACTGGGTTTACCAACAGGGAGTACACCTTTAGGATGCTATAAAAAACTAATAGAATAT	132789	Hs.21398	GO:0004342|GO:0005737|GO:0005975|GO:0006044|GO:0016787	glucosamine-6-phosphate isomerase 2 isoform 1	600.728	1705.96	9.09076	10.4555	299.326	968.787	534.072	2143.57	1797.29	1177.04	8.42268	9.53573	9.31388	10.7637	10.6739	9.92905
ASHGA5P039469	0.0125566	0.0502591	2.66014	down	protein_coding	ENST00000264399	CCDS3589.1	PRKG2	GENCODE	3328	chr4	-	82009836	82126215		GGACCACATTTGGGGAGCTTGCCATTTTATACAATTGTACAAGGACTGCCTCTGTGAAAG	5593	Hs.570833	GO:0044281|GO:0007165|GO:0006468|GO:0007596|GO:0050999|GO:0046209|GO:0005829|GO:0005524|GO:0004674|GO:0004672|GO:0004713|GO:0016772|GO:0030553|GO:0004692	protein kinase, cGMP-dependent, type II [Source:HGNC Symbol;Acc:9416]	8.15158	42.8374	3.56484	4.97634	10.5875	6.91571	6.95151	43.6529	48.8104	36.0488	4.02754	3.05746	3.60951	4.93349	5.28721	4.70831
ASHGA5P003131	8.17423e-05	0.00382669	2.9196	down	protein_coding	NM_006563	CCDS12285.1	KLF1	RefSeq	1615	chr19	-	12995236	12998017		TTCCCGGACACACAGGATGACTTCCTCAAGTGGTGGCGCTCCGAAGAGGCGCAGGACATG	10661	Hs.37860	GO:0000790|GO:0000987|GO:0001701|GO:0001889|GO:0003700|GO:0005634|GO:0006338|GO:0006351|GO:0008270|GO:0030218|GO:0035162|GO:0043249|GO:0044212|GO:0045893	Krueppel-like factor 1	5	22.8778	2.45604	4.00181	5	5	5	26.8809	19.88	21.8726	2.46913	2.40305	2.49594	4.18107	3.89216	3.9322
ASHGA5P029322	0.000212435	0.00575408	2.83284	down	protein_coding	NM_173849	CCDS9930.1	GSC	RefSeq	1217	chr14	-	95234559	95236499		ATCTTCACTGACGAGCAGCTCGAAGCTCTCGAGAACCTCTTCCAGGAGACCAAGTACCCG	145258	Hs.440438	GO:0000122|GO:0003677|GO:0003700|GO:0005634|GO:0005667|GO:0007369|GO:0021904|GO:0023019|GO:0030178|GO:0030900|GO:0042474|GO:0043565|GO:0048644|GO:0048704	homeobox protein goosecoid	5	22.1256	2.45604	3.95829	5	5	5	22.9263	23.6932	19.7575	2.46913	2.40305	2.49594	3.93092	4.16756	3.7764
ASHGA5P004239	0.000674061	0.0098622	2.09406	down	protein_coding	NM_138476	CCDS9620.1	MDP1	RefSeq	760	chr14	-	24683142	24685276	NM_001199823	AGCAAACTGGGTGTTACCTGCATTCACATCCAGAATGGAATGAATCTTCAAACTCTAAGT	145553	Hs.220963	GO:0004725|GO:0030389|GO:0046872	magnesium-dependent phosphatase 1 isoform 1	5179.42	12152.6	12.3162	13.3825	4527.16	5889.97	5121.13	12634.3	11726.3	12097.2	12.1979	12.2227	12.5282	13.3891	13.3192	13.4393
ASHGA5P053733	0.0214518	0.0713005	2.16293	down	protein_coding	NM_030940	CCDS35056.1	ISCA1	RefSeq	2012	chr9	-	88879462	88897490		GACTCCTAAAATCTGAGACAGGACATCGTGACTGCTGGTAGTAATATGGTGGTGCATTGT	81689	Hs.449291	GO:0005198|GO:0005739|GO:0016226|GO:0046872|GO:0051536	iron-sulfur cluster assembly 1 homolog, mitochondrial precursor	480.33	1129.55	8.79039	9.90338	267.877	808.551	364.561	1292.28	914.906	1181.46	8.28176	9.28039	8.80902	10.0489	9.72605	9.93518
ASHGA5P055278	0.000894639	0.0114071	2.16119	down	protein_coding	NM_138425	CCDS8571.1	C12orf57	RefSeq	574	chr12	+	7053202	7055165		CCGCCTCCTGAGAGTTGGCCCTCCCTTGTGCCACTGCCAGGGGAGGAAAGGCCTTGATGT	113246	Hs.405913		protein C10	10140	24403.4	13.2938	14.4056	11073.1	10084.3	9262.59	23540.9	25962.8	23706.6	13.4376	13.0564	13.3873	14.3302	14.4501	14.4365
ASHGA5P051471	2.35163e-05	0.00251764	4.92119	down	protein_coding	ENST00000316161	CCDS2707.1	CYP8B1	GENCODE	3950	chr3	-	42913683	42917633		ACTCAGTGAGGTGAAGCTCTTTATCCTGCTTATGGTCACACACTTTGACTTAGAGTTGGT	1582	Hs.447793	GO:0055114|GO:0044281|GO:0008206|GO:0006699|GO:0006805|GO:0016021|GO:0005789|GO:0005792|GO:0020037|GO:0009055|GO:0016705|GO:0005506|GO:0019825|GO:0008397|GO:0033778	cytochrome P450, family 8, subfamily B, polypeptide 1 [Source:HGNC Symbol;Acc:2653]	5.09627	39.7847	2.57634	4.87534	5	5.28882	5	40.6367	39.3095	39.4078	2.46913	2.76394	2.49594	4.82324	4.95606	4.84674
ASHGA5P008837	0.00292564	0.0214315	3.10613	down	protein_coding	ENST00000347619	CCDS12814.1	KLK8	GENCODE	590	chr19	-	51499263	51504958		AGCCTGGGCAGAGAATTTTCCTGACACTCTCAACTGTGCAGAAGTAAAAATCTTTCCCCA	11202	Hs.104570	GO:0006508|GO:0048812|GO:0009611|GO:0008219|GO:0043616|GO:0007613|GO:0048681|GO:0031642|GO:0050807|GO:0005737|GO:0005615|GO:0005515|GO:0004252|GO:0003824	kallikrein-related peptidase 8 [Source:HGNC Symbol;Acc:6369]	10.2447	56.4336	3.77061	5.40572	6.56211	16.6946	7.47746	58.1855	58.7451	52.3702	3.40208	4.21368	3.69606	5.37037	5.56941	5.2774
ASHGA5P003838	0.0489098	0.124127	2.10447	down	protein_coding	NM_032320	CCDS7811.1	BTBD10	RefSeq	2520	chr11	-	13409555	13484838		GGGATGAAGAATATCCACCACAGATGGGAGAAGAATATTCACAAATTATTTATAGCACAA	84280	Hs.332382	GO:0005634|GO:0005730|GO:0005737	BTB/POZ domain-containing protein 10	1275.37	2723.26	10.1007	11.1741	820.852	2291.44	713.805	3239.54	2123.28	2806.95	9.78471	10.8145	9.70289	11.3867	10.9133	11.2225
ASHGA5P050622	0.0210506	0.0704291	2.39412	down	protein_coding	NM_000576	CCDS2102.1	IL1B	RefSeq	1498	chr2	-	113587336	113594356		ATTTGTGTCTTCCTAAAGAGAGCTGTACCCAGAGAGTCCTGTGCTGAATGTGGACTCAAT	3553	Hs.126256	GO:0000165|GO:0000187|GO:0001660|GO:0001666|GO:0001934|GO:0001934|GO:0002439|GO:0002711|GO:0005125|GO:0005125|GO:0005149|GO:0005576|GO:0005576|GO:0005576|GO:0005615|GO:0005829|GO:0006915|GO:0006954|GO:0006954|GO:0007165|GO:0007204|GO:0007267|GO:0007566|GO:0007568|GO:0007613|GO:0008083|GO:0008285|GO:0009408|GO:0010193|GO:0010243|GO:0010332|GO:0010575|GO:0010575|GO:0010829|GO:0014050|GO:0014805|GO:…	interleukin-1 beta proprotein	19.4081	80.9967	4.69762	5.95711	15.2474	16.8321	26.1449	88.8392	74.0532	80.0978	4.51193	4.22428	5.35663	6.02273	5.93825	5.91036
ASHGA5P012755	0.0286365	0.0866595	2.10997	down	protein_coding	NM_001031739	CCDS35208.1	ASB9	RefSeq	1714	chrX	-	15262108	15288293	NM_001168530, NM_001168531, NM_024087	TCTGGAGTCAGGAGCGGACGTGAACCAAGGGAAAGGTCAGGATTCCCCACTTCATGCAGT	140462	Hs.19404	GO:0005515|GO:0005634|GO:0005730|GO:0005737|GO:0005739|GO:0016567|GO:0016567|GO:0035556|GO:0045732	ankyrin repeat and SOCS box protein 9 isoform 1	168.989	455.834	7.4453	8.52253	127.721	269.33	109.915	449.361	300.925	617.217	7.31862	7.79428	7.22301	8.48954	8.07401	9.00403
ASHGA5P003521	0.000522995	0.0087816	5.72313	down	protein_coding	NM_182511	CCDS11999.1	CBLN2	RefSeq	2910	chr18	-	70203914	70211723		TTTCGACCAGGTATTAGTAAATATTGGCAACCACTTTGATCTTGCTTCCAGTATATTTGT	147381	Hs.569851	GO:0005615|GO:0016021|GO:0051965	cerebellin-2 precursor	5.15798	54.2406	2.82823	5.34504	5	5.10779	5.36615	56.5148	54.9723	51.2347	2.46913	2.73647	3.2791	5.32634	5.46623	5.24254
ASHGA5P053083	0.00135989	0.0140946	3.26465	down	protein_coding	NM_001100159	CCDS47583.1	C7orf57	RefSeq	2149	chr7	+	48075107	48100894		TCTGTCTTTTCCCGCAGCGTGCAGCGCCTGACCATGAGGAACACAAGCAAGGAACTTCAG	136288	Hs.258357		uncharacterized protein C7orf57 isoform 1	5.22615	28.1931	2.59828	4.30521	5	5.67844	5	36.6523	23.6673	24.2597	2.46913	2.82977	2.49594	4.66394	4.16617	4.08551
ASHGA5P014312	0.0145732	0.0553461	2.67601	down	protein_coding	NM_001100600	CCDS47529.1	MMD2	RefSeq	2434	chr7	-	4945619	4998844	NR_072989	TCTTCCATGAGCGAACAGGGAGCTGTGTGCAGTTTCTTCGTGGGGAGGCATGTCCTAAGG	221938	Hs.558694	GO:0000139|GO:0016021	monocyte to macrophage differentiation factor 2 isoform 1	5.27413	25.4927	2.75117	4.17126	5	5	5.82239	30.711	24.0385	21.7286	2.46913	2.40305	3.38134	4.39883	4.19192	3.92302
ASHGA5P037117	0.0147015	0.0556976	2.55256	down	protein_coding	ENST00000243911	CCDS13449.2	MC3R	GENCODE	1084	chr20	+	54823787	54824871		GAATTGCGCAACACCTTTAGGGAGATTCTCTGTGGCTGCAACGGCATGAACTTGGGATAG	4159	Hs.248018	GO:0007186|GO:0007188|GO:0030819|GO:0007200|GO:0007187|GO:0016021|GO:0005886|GO:0005887|GO:0005515|GO:0017046|GO:0042923|GO:0004980|GO:0004977	melanocortin 3 receptor [Source:HGNC Symbol;Acc:6931]	5.48092	24.5226	2.75903	4.11098	6.44277	5	5	23.7376	21.5588	28.2713	3.3781	2.40305	2.49594	3.98903	4.01879	4.32511
ASHGA5P050980	0.000488877	0.00851986	2.00744	down	protein_coding	NM_001167820	CCDS13295.1	BLCAP	RefSeq	2216	chr20	-	36145818	36156333	NM_001167821, NM_001167822, NM_001167823, NM_006698	AACGGCCTGCCCTGTTAGCTTTCCAAGGAAGCAGAAGACGGGAGGGGAGGCATTGACATA	10904	Hs.472651	GO:0005515|GO:0006915|GO:0007049|GO:0016021	bladder cancer-associated protein	282.603	689.595	8.19858	9.20393	259.438	357.325	231.047	638.55	656.068	774.165	8.2382	8.17118	8.18636	9.02125	9.25108	9.33947
ASHGA5P000809	0.00418947	0.0257965	3.67701	down	protein_coding	NM_013439	CCDS5691.1	PILRA	RefSeq	1323	chr7	+	99971067	99997722		ACTGATCTGCCTCCTCAGGTGGAGGAGAAGGAAAGGTCAGCAGCGGACTAAAGCCACAAC	29992	Hs.444407	GO:0005515|GO:0005576|GO:0005886|GO:0007165|GO:0016021|GO:0019048	paired immunoglobulin-like type 2 receptor alpha isoform 1 precursor	61.7218	343.055	6.22019	8.09872	65.7753	73.0307	46.3594	389.979	405.117	234.068	6.43755	6.12513	6.09789	8.2669	8.51436	7.5149
ASHGA5P026204	0.0378396	0.104265	2.64197	down	protein_coding	NM_015055	CCDS31426.1	SWAP70	RefSeq	4848	chr11	+	9685627	9774507		ACCAAGAGCTGGAAGGACAAAGTGGCCCATCATGAAGGATTAATTCGACTGATAGAACCA	23075	Hs.153026	GO:0003677|GO:0005509|GO:0005524|GO:0005543|GO:0005634|GO:0005737|GO:0005886|GO:0030027|GO:0045190	switch-associated protein 70	220.238	620.937	7.61959	9.0212	157.904	419.399	83.4099	772.393	505.502	584.915	7.59082	8.39072	6.87722	9.29603	8.8451	8.92248
ASHGA5P047766	0.00304163	0.0218546	2.88902	down	protein_coding	ENST00000398023	CCDS41577.1	NPS	GENCODE	322	chr10	+	129347612	129350935		CTAGTTCTGTCGCTGTCCACAATGCATGTGTTTTGGTGTTATCCAGTTCCATCTTCTAAG	594857	Hs.643423	GO:0007218|GO:0032230|GO:0051968|GO:0045760|GO:0005576	neuropeptide S [Source:HGNC Symbol;Acc:33940]	17.4951	84.9475	4.49552	6.0261	12.8094	27.4414	12.2347	84.6304	95.1513	75.0609	4.27805	4.86516	4.34335	5.9501	6.31534	5.81285
ASHGA5P011276	0.0225128	0.0735229	2.15065	down	protein_coding	NM_000392	CCDS7484.1	ABCC2	RefSeq	5051	chr10	+	101542462	101611662		ATTGACACCAACCAGAAATGTGTCTTTTCCTGGATCACCTCCAACAGGTGGCTTGCAATT	1244	Hs.368243	GO:0005515|GO:0005524|GO:0005886|GO:0005887|GO:0006810|GO:0008514|GO:0015711|GO:0016324|GO:0042626|GO:0046581|GO:0055085	canalicular multispecific organic anion transporter 1	9.52956	40.0844	3.77701	4.88178	10.2348	8.05473	10.2991	34.7606	41.2716	44.2212	3.98094	3.24505	4.10505	4.58856	5.03584	5.02095
ASHGA5P012081	0.0400331	0.108207	2.09613	down	protein_coding	NM_000131	CCDS9528.1	F7	RefSeq	3144	chr13	+	113760101	113774995		AAACACGGGACATGCCGTGGAAGCCGGGGCCTCACAGAGTCTTCGTAACCCAGGAGGAAG	2155	Hs.36989	GO:0001948|GO:0002690|GO:0004252|GO:0005102|GO:0005509|GO:0005576|GO:0005615|GO:0005788|GO:0005796|GO:0005886|GO:0006508|GO:0007596|GO:0007598|GO:0007623|GO:0008236|GO:0010641|GO:0014070|GO:0017187|GO:0030194|GO:0030335|GO:0031100|GO:0032571|GO:0043627|GO:0043687|GO:0044267|GO:0050927|GO:0051897|GO:0060416	coagulation factor VII isoform a preproprotein	6.38652	20.9168	2.7974	3.86513	5	9.15956	5	20.256	24.0967	18.3975	2.46913	3.42714	2.49594	3.73245	4.19565	3.66729
ASHGA5P037270	0.00438722	0.0264974	2.84402	down	protein_coding	NM_181617	CCDS13605.1	KRTAP21-2	RefSeq	252	chr21	-	32119268	32119520		TCTAGCTGCTGTGGCTACCGACCACTTTGCTACAGAAGATGCTATTCCTCTTGCTACTAA	337978	Hs.553699	GO:0005882	keratin-associated protein 21-2	11.6001	58.3903	3.94526	5.4532	8.25248	18.4601	8.08765	53.7825	67.0317	54.3566	3.69731	4.34391	3.79458	5.25214	5.77894	5.32851
ASHGA5P011721	0.0315781	0.0924541	2.18958	down	protein_coding	NM_019117	CCDS14457.1	KLHL4	RefSeq	5880	chrX	+	86772714	86925050		ATGGAAAGAGGAAGTTCCTGTTAACATTGGAAGAGCTGGTGCATGTGTTGTAGTGGTGAA	56062	Hs.49075	GO:0003674|GO:0003779|GO:0005634|GO:0005730|GO:0005730|GO:0005737|GO:0005737|GO:0008150|GO:0015630|GO:0043231	kelch-like protein 4 isoform 1	778.815	1921.64	9.50457	10.6352	492.483	1176.4	667.559	2468.64	1964	1332.27	9.08172	9.82447	9.60752	10.9955	10.8035	10.1067
ASHGA5P049845	0.00772524	0.0368797	3.20778	down	protein_coding	NM_001142643	CCDS45775.1	CASKIN2	RefSeq	4514	chr17	-	73496341	73505958	NM_020753	ATTCATAACTGGCTAAGCGAGTTCCAGCTGGAGGGCTACACTGCCCACTTTCTGCAGGCC	57513	Hs.274408	GO:0003674|GO:0005737|GO:0008150	caskin-2 isoform b	6.52202	31.2104	2.81469	4.49626	5	9.56605	5	34.057	30.7023	28.8719	2.46913	3.479	2.49594	4.55919	4.57052	4.35908
ASHGA5P036727	0.000166122	0.00519971	2.55778	down	protein_coding	NM_001011878	CCDS33456.1	DEFB121	RefSeq	418	chr20	-	29992647	29994069		GATCATTCATCATTCATGAAGCTCCTTCTTCTGCTTTTGACTGTTACTCTGCTCCTGGCC	245934	Hs.272294	GO:0003674|GO:0005576|GO:0042742	beta-defensin 121 isoform 1 precursor	45.9245	179.848	5.81487	7.16976	36.2516	64.3223	37.1996	179.566	172.134	187.846	5.65678	5.96197	5.82584	7.08397	7.23714	7.18817
ASHGA5P055641	0.0060109	0.0318684	2.07945	down	protein_coding	ENST00000340368	CCDS5938.1	INSIG1	GENCODE	3010	chr7	+	155089485	155101945		CAGTCACCTCGGAGAACCCCACAAATTTAAGAGAGAATGGGCCAGTGTCATGCGCTGCAT	3638	Hs.520819	GO:0042472|GO:0008283|GO:0006641|GO:0045599|GO:0045717|GO:0060021|GO:0042474|GO:0006695|GO:0006991|GO:0010894|GO:0060363|GO:0008152|GO:0030967|GO:0008203|GO:0016126|GO:0016021|GO:0005789|GO:0005783|GO:0005515	insulin induced gene 1 [Source:HGNC Symbol;Acc:6083]	853.575	2001.31	9.65633	10.7125	672.88	1257.56	630.288	2020.26	1575.01	2408.67	9.51056	9.93079	9.52765	10.6778	10.4833	10.9766
ASHGA5P004379	0.000321233	0.00692798	2.14309	down	protein_coding	NM_000960	CCDS12686.1	PTGIR	RefSeq	2103	chr19	-	47123724	47128354		GCCTCTCACGATCCGCTGCTTCACCCAGGCTGTCGCCCCTGACAGCAGCAGTGAGATGGG	5739	Hs.458324	GO:0004930|GO:0005085|GO:0005829|GO:0005886|GO:0005886|GO:0005887|GO:0007187|GO:0007189|GO:0007267|GO:0007596|GO:0010642|GO:0030819|GO:0032496|GO:0043950|GO:0048662	prostacyclin receptor	32.4658	116.615	5.4006	6.5003	29.9176	38.1836	29.2962	132.581	107.561	109.702	5.40212	5.28875	5.51094	6.62219	6.50035	6.37835
ASHGA5P009596	0.0184606	0.0646254	2.37517	down	protein_coding	NM_001002032	CCDS32729.1	HN1	RefSeq	1582	chr17	-	73131343	73150774		ACTCCTCTGAAGCAAGCTCCGGAGACTTCTTAGATCTGAAGAAAATGTGGACACAGACTT	51155	Hs.532803	GO:0005634	hematological and neurological expressed 1 protein isoform 2	4582.46	12062	12.0846	13.3327	3799.71	6679.75	3267.93	11057.7	8825.31	16302.9	11.9499	12.4207	11.8833	13.1956	12.9354	13.867
ASHGA5P008663	0.0105004	0.04496	2.01611	down	protein_coding	ENST00000535737	CCDS14655.1	FHL1	GENCODE	2437	chrX	+	135230736	135293518	ENST00000394155, ENST00000539015, NM_001159699, NM_001159704, NM_001167819, NM_001449, NR_027621	GCGTGAAGTGCAACAAGGCCATCACATCTGGAGGAATCACTTACCAGGATCAGCCCTGGC	2273	Hs.435369	GO:0030154|GO:0030308|GO:2000134|GO:0009887|GO:0007517|GO:0010972|GO:0005634|GO:0005737|GO:0005886|GO:0005829|GO:0003674|GO:0008270|GO:0005515	four and a half LIM domains 1 [Source:HGNC Symbol;Acc:3702]	710.358	1589.98	9.37203	10.3836	481.807	1112.87	536.398	1779.78	1289.68	1700.46	9.05255	9.74522	9.31833	10.4936	10.1953	10.462
ASHGA5P009566	0.00389711	0.0248061	2.08063	down	protein_coding	NM_130791	CCDS42197.1	WWOX	RefSeq	959	chr16	+	78133326	78312593		AGAAGAATGGAAAACAAAATACCACCCTCCGCCAGAAAAGTGCAGAATAAAAATTTTCCA	51741	Hs.461453	GO:0000166|GO:0001649|GO:0005515|GO:0005634|GO:0005737|GO:0005737|GO:0005739|GO:0005794|GO:0005829|GO:0005829|GO:0005886|GO:0005902|GO:0006915|GO:0006917|GO:0008202|GO:0016055|GO:0016491|GO:0016491|GO:0019899|GO:0030178|GO:0043065|GO:0045944|GO:0046983|GO:0048037|GO:0048705|GO:0050662|GO:0055114|GO:0071560	WW domain-containing oxidoreductase isoform 2	802.032	1941.4	9.63241	10.6894	822.156	823.97	759.969	1951.71	1994.92	1877.58	9.78704	9.30743	9.80275	10.632	10.8256	10.6107
ASHGA5P049387	0.000512636	0.00872977	2.07459	down	protein_coding	NM_017702	CCDS45555.1	DEF8	RefSeq	932	chr16	+	90015138	90025774	NM_001242821, NM_001242822	ACCTGCACAGGTGGGCCGAGACCCAGACGAGGAGTGAGGAATGAGAGAGACCAAAGTTCC	54849	Hs.62771	GO:0005622|GO:0008270|GO:0035556	differentially expressed in FDCP 8 homolog isoform 2	3297.43	7609.71	11.6409	12.6937	3224.18	3796.26	2871.85	6988.61	7576.96	8263.58	11.691	11.5448	11.6869	12.525	12.7195	12.8367
ASHGA5P031676	0.0119226	0.0485303	2.25479	down	protein_coding	NM_014712	CCDS32435.1	SETD1A	RefSeq	6447	chr16	+	30968614	30995981		TTCCAAATGTTCTCTGTATGCTGACTCAGATGGCGAAAATGACAGCACATCAGACTCCGA	9739	Hs.297483	GO:0000166|GO:0003723|GO:0005515|GO:0005634|GO:0005694|GO:0005730|GO:0006351|GO:0006355|GO:0016607|GO:0035097|GO:0042800|GO:0048188|GO:0051568	histone-lysine N-methyltransferase SETD1A	6.07933	21.5434	2.74841	3.9214	5	8.23798	5	22.7556	21.0218	20.8529	2.46913	3.28016	2.49594	3.92018	3.98047	3.86356
ASHGA5P016806	0.00101152	0.0120661	2.19964	down	protein_coding	ENST00000434452	CCDS32811.1	DSC3	GENCODE	6978	chr18	-	28570051	28622781	NM_004949	AACCCCGTCTCGGTGAAGAATCCATTAGAGGACACACTGGTTAAAAATTAAACATAAAAG	1825	Hs.41690	GO:0007156|GO:0007155|GO:0001701|GO:0050821|GO:0016021|GO:0005737|GO:0005886|GO:0005576|GO:0016020|GO:0005624|GO:0005911|GO:0030057|GO:0005509|GO:0045295	desmocollin 3 [Source:HGNC Symbol;Acc:3037]	155.177	442.249	7.38972	8.52699	155.742	202.475	107.315	498.204	370.724	457.819	7.57144	7.40417	7.19355	8.64264	8.38693	8.55139
ASHGA5P044139	0.00924795	0.041583	2.75737	down	protein_coding	NM_020749	CCDS43719.1	MTUS1	RefSeq	3819	chr8	-	17501302	17555246		AGGATTGCTTCGAAACCTTCGACTTCCTTCAGGGTTTAGGAGAAGCACTGTTGTTTTCCA	57509	Hs.7946	GO:0005634|GO:0005739|GO:0005794|GO:0005815|GO:0005819|GO:0005874|GO:0005886	microtubule-associated tumor suppressor 1 isoform 5	168.931	567.835	7.41013	8.87342	111.092	288.058	107.643	754.516	443.508	505.481	7.14141	7.89055	7.19842	9.2651	8.65045	8.70471
ASHGA5P048515	1.46915e-06	0.00126379	3.33206	down	protein_coding	NM_001005187	CCDS31700.1	OR6T1	RefSeq	972	chr11	-	123813573	123814545		TTCCATCTTTCTCTACATTCGTATGTCAGAGGCTCAGTCCAAACTGCTCAACAAAGGTGC	219874	Hs.553638	GO:0004930|GO:0004984|GO:0005886|GO:0016021	olfactory receptor 6T1	5	25.7128	2.45604	4.19245	5	5	5	27.6729	24.3381	25.1274	2.46913	2.40305	2.49594	4.2274	4.21079	4.13918
ASHGA5P036971	0.00201246	0.0172851	2.88459	down	protein_coding	NM_018993		RIN2	RefSeq	4265	chr20	+	19870209	19983103	NM_001242581	AAGGCTCAGGAATCAGTTTCGCAGATTTATTCCGGCTCATTGCTTTCTACTGCATCAGCA	54453	Hs.472270	GO:0005083|GO:0005096|GO:0005575|GO:0005737|GO:0006897|GO:0007264|GO:0017112	ras and Rab interactor 2 isoform 2	6.80483	40.0385	3.35558	4.88394	6.81015	6.62337	6.98097	37.0722	42.3387	40.7047	3.44638	3.00669	3.61365	4.68216	5.07328	4.89639
ASHGA5P050592	0.000377121	0.00750421	2.03211	down	protein_coding	NM_001242559		MAP4K4	RefSeq	7183	chr2	+	102314537	102511152		AGAACAAGCATATCTCCTGTCTCTACAGCATGACCATAGGAGGCCGCACCCGCAGCACTC	9448	Hs.431550	GO:0004674|GO:0005083|GO:0005515|GO:0005524|GO:0005737|GO:0006468|GO:0006950|GO:0007243|GO:0046328	mitogen-activated protein kinase kinase kinase kinase 4 isoform 4	60.8031	183.716	6.16951	7.19248	49.88	85.5022	47.027	196.33	157.064	197.753	6.07504	6.31856	6.11492	7.22592	7.08821	7.26332
ASHGA5P038010	0.00184273	0.0164256	2.29254	down	protein_coding	NM_001004339	CCDS44148.1	ZYG11A	RefSeq	4286	chr1	+	53308182	53360247		AATTTGTGGGACTATTGGCCACGGATGCTGGCTCTTCTGACTTCTTTACTACAAAGCAAG	440590	Hs.658458		protein zyg-11 homolog A	22.4912	88.0832	4.89038	6.08733	16.1733	28.8718	22.4286	93.708	82.9747	87.5669	4.59276	4.92795	5.15043	6.10012	6.11325	6.04861
ASHGA5P021938	0.000714376	0.0101773	2.42659	down	protein_coding	ENST00000545128	CCDS55320.1	PCSK5	GENCODE	9538	chr9	+	78505559	78977255		TTCTGGAATGATATTTTGAGAAAACTCCAGCCTTGTCATTCTTCTTGTAAAACCTGCAAT	5125	Hs.368542	GO:0006508|GO:0007507|GO:0007566|GO:0009952|GO:0048706|GO:0007267|GO:0001822|GO:0006465|GO:0016485|GO:0035108|GO:0016486|GO:0043043|GO:0048011|GO:0048566|GO:0032455|GO:0019067|GO:0042089|GO:0002001|GO:0030323|GO:0016021|GO:0005615|GO:0005794|GO:0012505|GO:0030141|GO:0005796|GO:0005515|GO:0004252|GO:0042277	proprotein convertase subtilisin/kexin type 5 [Source:HGNC Symbol;Acc:8747]	23.7927	97.5009	4.95902	6.23795	18.0244	32.5349	20.819	99.3918	100.524	92.5866	4.74079	5.08313	5.05316	6.18638	6.39647	6.131
ASHGA5P053319	0.00391727	0.0248597	2.66134	down	protein_coding	NM_025063	CCDS41436.1	C1orf129	RefSeq	2258	chr1	+	170904635	170967946		CCTCACTGAAGTGAGTTTTGTAGACTGTGAACAGCTGTGTTCTCATTTCCTTTTCTTACC	80133	Hs.591489		uncharacterized protein C1orf129 isoform 2	12.2451	60.0411	4.07971	5.49186	15.0816	13.4906	8.1632	68.7711	58.6488	52.7035	4.49687	3.93621	3.80604	5.62235	5.56612	5.2871
ASHGA5P003072	0.00659114	0.0336486	2.40492	down	protein_coding	NM_006345	CCDS3465.1	SLC30A9	RefSeq	3272	chr4	+	41992522	42089551		AAATACCAAGCCACGCTCCAGAACAGCATCAGTGTTTTTTAAGGGACCAGGAAAAGTGGT	10463	Hs.479634	GO:0000166|GO:0003700|GO:0005634|GO:0005856|GO:0006289|GO:0006351|GO:0006829|GO:0008324|GO:0016021	zinc transporter 9	762.221	2160.36	9.54682	10.8128	642.775	912.975	730.914	2631.1	2261.03	1588.95	9.44355	9.45669	9.74023	11.0768	10.9949	10.3668
ASHGA5P003076	0.00173587	0.0158324	3.03826	down	protein_coding	NM_021803	CCDS3727.1	IL21	RefSeq	617	chr4	-	123533782	123542212		TCTCCAAAAGATGATTCATCAGCATCTGTCCTCTAGAACACACGGAAGTGAAGATTCCTG	59067	Hs.567559	GO:0002729|GO:0005125|GO:0005126|GO:0005134|GO:0005615|GO:0006955|GO:0007165|GO:0032733|GO:0032740|GO:0032825|GO:0034105|GO:0042102|GO:0045078|GO:0045954|GO:0048469|GO:0050729	interleukin-21 isoform 1 precursor	5.70097	27.3342	2.6837	4.28695	5	7.10292	5	30.9033	25.8597	25.2397	2.46913	3.08603	2.49594	4.40918	4.30469	4.14696
ASHGA5P041813	0.0193078	0.0665445	2.22227	down	protein_coding	NM_006708	CCDS4837.1	GLO1	RefSeq	2071	chr6	-	38643701	38670952		AGAAAAAGATGAAAAAATAGCCTGGGCGCTCTCCAGAAAAGCTACACTTGAGCTGACACA	2739	Hs.268849	GO:0004462|GO:0005737|GO:0005975|GO:0006357|GO:0006749|GO:0009438|GO:0046872	lactoylglutathione lyase	1498.29	3709.89	10.4516	11.6036	1000.04	2321.7	1173.12	4790.18	3521.43	2818.07	10.0677	10.8359	10.4512	11.9481	11.6338	11.229
ASHGA5P008306	0.0387781	0.10595	2.02101	down	protein_coding	NM_001161565	CCDS54674.1	TNIK	RefSeq	5564	chr3	-	170780291	171178197	NM_001161561, NM_001161563, NM_015028	GAATCCAGGGACATTACCCGGCCCAGTCGACCAGCTAGCTACAAAAAAGCTATAGATGAG	23043	Hs.34024	GO:0004674|GO:0005083|GO:0005515|GO:0005524|GO:0005634|GO:0005730|GO:0005737|GO:0005856|GO:0006468|GO:0006950|GO:0007010|GO:0007243|GO:0007256|GO:0007256|GO:0016055|GO:0031532|GO:0046777|GO:0048814|GO:0055037	TRAF2 and NCK-interacting protein kinase isoform 7	6.40438	20.3171	2.79944	3.81453	5	9.21314	5	23.7075	16.6835	20.5604	2.46913	3.43326	2.49594	3.98758	3.61511	3.84088
ASHGA5P003686	0.00043447	0.00796553	2.24852	down	protein_coding	NM_001347	CCDS3342.1	DGKQ	RefSeq	4659	chr4	-	952671	967348		ATGAGGCCGGGGCTACCAAAGCCACCGTGGTGTCCGTGAGTCACATCTACTCCTCCCAAG	1609	Hs.584858	GO:0004143|GO:0005515|GO:0005524|GO:0005634|GO:0005737|GO:0005829|GO:0005856|GO:0005886|GO:0005886|GO:0007186|GO:0007205|GO:0007596|GO:0016607|GO:0019900|GO:0019933|GO:0030168|GO:0033198|GO:0033613|GO:0043274|GO:0046872|GO:0070493|GO:0070528	diacylglycerol kinase theta	169.95	487.907	7.51689	8.68587	126.416	230.291	153.143	507.568	460.773	495.379	7.30477	7.58127	7.66463	8.67342	8.70946	8.67472
ASHGA5P046382	1.93819e-05	0.00239831	2.9273	down	protein_coding	NM_004988	CCDS14720.1	MAGEA1	RefSeq	1755	chrX	-	152481521	152486116		AAAGTCCTTGAGTATGTGATCAAGGTCAGTGCAAGAGTTCGCTTTTTCTTCCCATCCCTG	4100	Hs.72879	GO:0000122|GO:0005515|GO:0005634|GO:0005737|GO:0005886|GO:0006351|GO:0042826|GO:0045746	melanoma-associated antigen 1	48.7649	218.826	5.91475	7.46432	47.5716	61.5267	37.1965	219.433	202.642	234.401	6.01463	5.90404	5.82559	7.39388	7.4827	7.51639
ASHGA5P038067	0.00178364	0.0160435	3.041	down	protein_coding	NM_138433	CCDS14097.2	KLHDC7B	RefSeq	3008	chr22	+	50986461	50989452		CTGTTTTTTATTCTATGTTCAGCACCACTGGCACCAAATACATTTTAATTCACCGAAAGC	113730	Hs.137007		kelch domain-containing protein 7B	8.52099	50.554	3.63056	5.2351	10.2316	8.3957	6.93567	56.0438	50.6264	44.9917	3.9802	3.30458	3.6069	5.31489	5.34334	5.04708
ASHGA5P051736	0.00807892	0.0380278	2.17771	down	protein_coding	NM_001167916	CCDS54661.1	VEPH1	RefSeq	1402	chr3	-	157177409	157221415	NM_001167915	GTGGGAAGCAAGACCTAGAGTATTAGAAGCAAATTAATTTCTCTGTTTTGCTGCCAGTTG	79674	Hs.658046	GO:0005543|GO:0005886	ventricular zone-expressed PH domain-containing protein homolog 1 isoform 3	2834.8	7084.08	11.4289	12.5517	2861.34	3012.04	2631.02	7185.2	8626.4	5440.64	11.5153	11.2132	11.5583	12.5561	12.8996	12.1995
ASHGA5P043670	2.95183e-05	0.00269605	2.03187	down	protein_coding	NM_182595	CCDS43584.1	POM121L12	RefSeq	1284	chr7	+	53103348	53104618		GCTTGCTTTTTCTCCATGTCTCCCAGTTTGTATAGTTAAATTGTCCAGTTGTATAGTTAA	285877	Hs.381970		POM121-like protein 12	248.681	621.852	8.02872	9.05153	237.018	314.594	194.432	657.619	587.628	620.309	8.11353	8.00452	7.96811	9.05689	9.08442	9.01328
ASHGA5P009268	0.00232407	0.0187871	2.38173	down	protein_coding	NM_000036	CCDS876.2	AMPD1	RefSeq	2426	chr1	-	115215719	115238239		TCCTAGAATCAAGGATTTCAGCAACAATGCCTCTGTTCAAACTCCCAGCTGAAGAGAAAC	270	Hs.89570	GO:0003876|GO:0005829|GO:0006144|GO:0010033|GO:0032036|GO:0032264|GO:0043101|GO:0044281|GO:0046872|GO:0055086	AMP deaminase 1 isoform 1	27.0153	103.752	5.08111	6.33312	22.2115	40.7904	18.0439	100.577	108.178	102.5	5.0104	5.37995	4.85299	6.20159	6.51234	6.28545
ASHGA5P053723	0.00311211	0.0221444	2.03682	down	protein_coding	NM_182505	CCDS6639.1	C9orf85	RefSeq	1328	chr9	+	74526422	74588371		TGATTTAGAAGACACAGGAGGAGACCATCAAATGAATTAATATCACTGTATTAAAAGTCT	138241	Hs.534190		uncharacterized protein C9orf85	538.737	1230.28	9.00263	10.029	411.231	828.398	376.582	1297.22	1080.15	1313.47	8.84413	9.31388	8.84988	10.0542	9.94778	10.0848
ASHGA5P045090	0.00456181	0.0270156	2.43287	down	protein_coding	NM_145754	CCDS6427.1	KIFC2	RefSeq	3309	chr8	+	145691737	145699499		ATGTACGCCTTTTACTCGTTGCTCATCTACATCTTCTACAGCCTCTTCCGCAGGGATGGT	90990	Hs.528713	GO:0003777|GO:0005524|GO:0005737|GO:0005874|GO:0007018	kinesin-like protein KIFC2	73.6307	264.282	6.46701	7.74967	83.8727	69.5307	67.4888	282.259	261.501	249.086	6.75314	6.05658	6.59131	7.77212	7.86686	7.61002
ASHGA5P011996	1.25801e-05	0.00216313	2.31195	down	protein_coding	NM_207339	CCDS14367.1	PAGE2	RefSeq	499	chrX	+	55115496	55119260		AAGACTCAGCCGTGGGAAATATGAGTGAGCTTCTAAGAGCAAGATCCCAATCCTCAGAAA	203569	Hs.662489		G antigen family E member 2	5	18.312	2.45604	3.66515	5	5	5	19.2941	17.9679	17.6741	2.46913	2.40305	2.49594	3.65587	3.73328	3.6063
ASHGA5P011106	0.0196104	0.0672241	2.22456	down	protein_coding	NM_003188	CCDS5027.1	MAP3K7	RefSeq	5091	chr6	-	91223291	91297020	NM_145333	GCAACCACAGGCAACGGACAGCCAAGACGTAGATCCATCCAAGACTTGACTGTAACTGGA	6885	Hs.644143	GO:0000186|GO:0000187|GO:0000187|GO:0000287|GO:0001525|GO:0001841|GO:0002224|GO:0002726|GO:0002755|GO:0002756|GO:0004672|GO:0004674|GO:0004708|GO:0004709|GO:0005515|GO:0005524|GO:0005671|GO:0005829|GO:0005886|GO:0006351|GO:0006915|GO:0007179|GO:0007249|GO:0007250|GO:0007252|GO:0007254|GO:0007254|GO:0008063|GO:0008385|GO:0010008|GO:0032743|GO:0034130|GO:0034134|GO:0034138|GO:0034142|GO:0035666|GO:…	mitogen-activated protein kinase kinase kinase 7 isoform A	419.014	1009.85	8.59219	9.74571	247.378	723.964	285.699	1223.56	897.156	908.829	8.17313	9.12938	8.47405	9.96988	9.69805	9.5692
ASHGA5P049183	0.00163552	0.0153445	2.98909	down	protein_coding	NM_000887	CCDS10711.1	ITGAX	RefSeq	4666	chr16	+	31366508	31394318		TGATGCAGTTCTCCAACAAATTCCAAACACACTTCACTTTCGAGGAATTCAGGCGCAGCT	3687	Hs.248472	GO:0004872|GO:0005515|GO:0005886|GO:0007155|GO:0007229|GO:0007596|GO:0008305|GO:0009887|GO:0009897|GO:0050900|GO:0051607	integrin alpha-X precursor	5	23.4828	2.45604	4.03575	5	5	5	22.5603	28.3358	19.5521	2.46913	2.40305	2.49594	3.90578	4.44104	3.76042
ASHGA5P001642	0.044265	0.115821	2.67496	down	protein_coding	NM_001394	CCDS6072.1	DUSP4	RefSeq	5625	chr8	-	29190578	29208267		CTGCTCAAAGGCGGCTATGAGAGGTTTTCCTCCGAGTACCCAGAATTCTGTTCTAAAACC	1846	Hs.417962	GO:0000165|GO:0000188|GO:0001706|GO:0002224|GO:0002755|GO:0002756|GO:0004725|GO:0005634|GO:0005654|GO:0006470|GO:0008063|GO:0008330|GO:0010033|GO:0017017|GO:0034130|GO:0034134|GO:0034138|GO:0034142|GO:0035666|GO:0045087|GO:0048011|GO:0051403	dual specificity protein phosphatase 4 isoform 1	7.70846	28.9291	2.95543	4.37495	5	13.1254	5	26.1948	30.9838	29.6086	2.46913	3.90122	2.49594	4.14244	4.58519	4.39723
ASHGA5P008399	0.000739086	0.0103376	2.16749	down	protein_coding	ENST00000342704	CCDS46590.1	CBFA2T2	GENCODE	7319	chr20	+	32077927	32237837		GCCTTCCAGCTTGGTCCTGAGAAAAGGGTGCCAGCGATGCCTGGATCGCCTGTGGAAGTG	9139	Hs.153934	GO:0030855|GO:0045892|GO:0006355|GO:0003700|GO:0008270|GO:0003714	core-binding factor, runt domain, alpha subunit 2; translocated to, 2 [Source:HGNC Symbol;Acc:1536]	25.3244	94.3108	5.06987	6.1859	20.8167	29.999	25.1576	103.415	84.5336	94.9841	4.92845	4.98133	5.29983	6.24316	6.14182	6.17271
ASHGA5P002840	0.0224578	0.0734209	2.86931	down	protein_coding	NM_001171689	CCDS55476.1	AMMECR1	RefSeq	5618	chrX	-	109437413	109683461	NM_015365	ATTTGCATTCAGGACTCAGGGAGTACACACTTACCAGTGCCCTTAAAGATAGCCGTTTTC	9949	Hs.656243	GO:0003674|GO:0005575|GO:0008150	AMME syndrome candidate gene 1 protein isoform 3	28.0312	132.677	5.12958	6.65029	30.5207	37.5503	16.0226	128.335	180.213	89.4826	5.42928	5.26928	4.69018	6.5669	7.30392	6.08004
ASHGA5P029435	0.000799263	0.0107828	2.13274	down	protein_coding	NM_001029991	CCDS41913.1	METTL17	RefSeq	1802	chr14	+	21457964	21465194		TGACCAAAATCAGTGGGATGTGGCAGGAAGCTGCAGCCCACGCCAGCATCTGTTTCCACA	64745	Hs.512693	GO:0005507|GO:0005515|GO:0005739|GO:0005840|GO:0006412|GO:0008168	methyltransferase-like protein 17, mitochondrial isoform 1 precursor	411.853	1054.12	8.71852	9.81123	416.901	473.654	345.005	980.935	1038	1143.44	8.86696	8.55499	8.73361	9.65425	9.89242	9.88701
ASHGA5P029608	0.00697104	0.034823	2.6301	down	protein_coding	NM_005988	CCDS1034.1	SPRR2A	RefSeq	692	chr1	-	153028595	153029988	ENST00000360379	CTACCACCTTTGCAATTGTCACTTATCTTTCACTCCCTGAATAAAGTATCTATGCATATA	6700	Hs.355542	GO:0001533|GO:0005737|GO:0008544|GO:0030216|GO:0031424	small proline-rich protein 2A	62.5428	228.751	6.13352	7.52864	35.6763	99.7284	52.2237	219.585	207.062	259.605	5.63305	6.5144	6.25311	7.39515	7.51794	7.67282
ASHGA5P011166	0.0293816	0.0880546	2.42342	down	protein_coding	NM_004832	CCDS7555.1	GSTO1	RefSeq	1017	chr10	+	106014467	106027222	NM_001191002	TTGGGGAAGGGAAGCGCGCCCCCGGGGCCGGTCCCGGAGGGCTCGATCCGCATCTACAGC	9446	Hs.190028	GO:0004364|GO:0005737|GO:0005829|GO:0006805|GO:0016491|GO:0019852|GO:0019853|GO:0042178|GO:0044281|GO:0045174|GO:0050610|GO:0071243	glutathione S-transferase omega-1 isoform 1	984.674	2733.44	9.84501	11.1221	765.095	1498.38	690.55	2548.28	1682.01	3970.02	9.67633	10.2048	9.6539	11.0345	10.5819	11.7497
ASHGA5P044140	0.00233297	0.0188188	2.22246	down	protein_coding	NM_001001931	CCDS43718.1	MTUS1	RefSeq	4022	chr8	-	17501302	17579730		GTCGTGGGATCGTACAGCCTTTGTATAATTCCTTTGTTAGCCACGTTTACTGGGAAAAAA	57509	Hs.7946	GO:0005634|GO:0005739|GO:0005794|GO:0005815|GO:0005819|GO:0005874|GO:0005886	microtubule-associated tumor suppressor 1 isoform 4	8.50595	37.1104	3.60681	4.75897	9.04333	10.678	5.79656	42.0684	36.8991	32.3638	3.81596	3.62774	3.37675	4.87514	4.86009	4.54168
ASHGA5P001760	0.0134244	0.0525586	3.58636	down	protein_coding	NM_020745	CCDS34464.1	AARS2	RefSeq	4782	chr6	-	44266462	44281063		AAATGCTTGGCAATTGGGCCTTTGGGGGTGAATATTTTAAGGAGGAGGCTTGTAACATGG	57505	Hs.158381	GO:0000049|GO:0004813|GO:0005524|GO:0005739|GO:0006418|GO:0010467|GO:0033108|GO:0046872|GO:0070143	alanine--tRNA ligase, mitochondrial	7.32629	36.8829	2.91529	4.75781	5	11.9789	5	36.3364	35.817	38.4954	2.46913	3.78079	2.49594	4.65094	4.81269	4.80979
ASHGA5P047021	0.00179091	0.0160855	2.23384	down	protein_coding	NM_152309	CCDS31259.1	PIK3AP1	RefSeq	4817	chr10	-	98353068	98480279		TCACCTGTGACGATGAGCCAGAGACCTACGTGGCAGCTGTGAAAAAAGCCATTTCCGAAG	118788	Hs.310456	GO:0005829|GO:0005886|GO:0042802	phosphoinositide 3-kinase adapter protein 1	5	17.7812	2.45604	3.61557	5	5	5	15.4116	19.0451	18.887	2.46913	2.40305	2.49594	3.31443	3.82635	3.70593
ASHGA5P005946	0.00147758	0.0146022	2.73387	down	protein_coding	NM_003301	CCDS6311.1	TRHR	RefSeq	1415	chr8	+	110099652	110131812		AAGGAAGCAGGTCACCAAGATGCTGGCAGTGGTTGTAATTCTGTTTGCCCTTTTATGGAT	7201	Hs.3022	GO:0004997|GO:0005886|GO:0005887|GO:0007186|GO:0007204|GO:0009986|GO:0042803|GO:0090073	thyrotropin-releasing hormone receptor	17.0422	83.592	4.55763	6.00858	18.1587	16.5285	16.4395	87.9821	82.3771	80.4169	4.74885	4.20049	4.72355	6.00697	6.10285	5.91591
ASHGA5P011013	0.0395516	0.107376	2.33707	down	protein_coding	NM_147191	CCDS7647.1	MMP21	RefSeq	1919	chr10	-	127455026	127464390		AAAGCTGTATGGCTCCTGTGAGGGATCATTTGATACTGCGTTTGACTGGATTCGCAAAGA	118856	Hs.314141	GO:0004222|GO:0005509|GO:0005576|GO:0006508|GO:0008270|GO:0031012	matrix metalloproteinase-21 preproprotein	6.70419	28.3974	3.0766	4.3013	6.91085	8.20173	5	35.9058	29.9205	19.3659	3.4613	3.27255	2.49594	4.63374	4.52495	3.74522
ASHGA5P026149	0.00131596	0.013904	2.32988	down	protein_coding	NM_001005169		OR52I1	RefSeq	975	chr11	+	4615268	4616243		CAAACAATTGCTGGAGGGAATATGGAGTTATCTGATGCACTTCCTCTTTGACCACTCCAA	390037	Hs.553727	GO:0004930|GO:0004984|GO:0005886|GO:0016021	olfactory receptor 52I1	14.1238	59.7206	4.26568	5.48594	14.903	17.8664	9.60203	66.7696	57.1735	55.2186	4.48203	4.30123	4.01378	5.57961	5.52416	5.35404
ASHGA5P043630	0.0319021	0.0932006	2.60802	down	protein_coding	NM_002481	CCDS1426.1	PPP1R12B	RefSeq	11108	chr1	+	202317829	202557697		TAGTTCACTAGCACCCCGGAAGCTCAACAGCACAAGTGATATTGAAGAAAAGGAGAACAG	4660	Hs.444403	GO:0005737|GO:0005886|GO:0006937|GO:0007165|GO:0008047|GO:0015629|GO:0043085	protein phosphatase 1 regulatory subunit 12B isoform a	6.51181	29.7277	3.0344	4.41736	9.19187	5.34355	5	30.8136	32.3083	26.0612	3.83421	2.77305	2.49594	4.40404	4.64771	4.20032
ASHGA5P054692	0.00478975	0.0278918	2.03352	down	protein_coding	NM_033092	CCDS31394.1	TRIM5	RefSeq	3659	chr11	-	5684424	5706339		CGCTACTGGGGTAAGGAGAAGTCACATTATCATAAGCCACCCTGCGGCTTATCATTATTA	85363	Hs.370515	GO:0000932|GO:0000932|GO:0005515|GO:0005634|GO:0005730|GO:0005737|GO:0005794|GO:0008270|GO:0009615|GO:0016567|GO:0016874|GO:0019048|GO:0042802|GO:0042803|GO:0070206	tripartite motif-containing protein 5 isoform gamma	498.912	1195.14	8.96699	9.99098	558.98	530.371	407.386	1108.03	1210.47	1266.9	9.25406	8.69712	8.94979	9.83215	10.1072	10.0336
ASHGA5P003878	0.0155121	0.0574001	4.37668	down	protein_coding	NM_000139	CCDS7980.1	MS4A2	RefSeq	3658	chr11	+	59856136	59865940		GTTCCTGGGGGTAACACAAATTCTGACTGCTATGATATGCCTTTGTTTTGGAACAGTTGT	2206	Hs.386748	GO:0005262|GO:0005768|GO:0005887|GO:0006954|GO:0006959|GO:0007186|GO:0007202|GO:0007205|GO:0008283|GO:0009897|GO:0019767|GO:0019863|GO:0019901|GO:0032998|GO:0042169|GO:0043306|GO:0045121|GO:0050663|GO:0051219|GO:0051279|GO:0070588	high affinity immunoglobulin epsilon receptor subunit beta isoform 1	9.0703	63.6014	3.45087	5.58071	5	11.1001	11.1108	72.0904	63.5945	55.1194	2.46913	3.67922	4.20426	5.69218	5.6974	5.35254
ASHGA5P014379	1.47857e-05	0.00221669	2.38124	down	protein_coding	NM_016400	CCDS10104.1	C15orf63	RefSeq	1351	chr15	+	44092618	44094769	NM_001199885, NR_037673	AGATCTGGAGCTAATAATGACTGAGATGGAGATATCTCGAGCAGCAGCAGAACGCAGTTT	25764	Hs.730672		huntingtin-interacting protein K isoform 1	10651.1	28139.1	13.3538	14.6055	9857.4	12331.6	9764.34	28177.3	28699.9	27540.2	13.2812	13.3383	13.4419	14.5765	14.6078	14.6322
ASHGA5P026723	0.0168314	0.0606816	2.59052	down	protein_coding	NM_001008781		FAT3	RefSeq	19048	chr11	+	92085261	92629635		TTACTTTCTCAATATCACTGCCACTGATGGGCTTTTTGTCACACAGGCCATGGTGGAAGT	120114	Hs.98523	GO:0005509|GO:0005886|GO:0007156|GO:0007275|GO:0016021	protocadherin Fat 3 precursor	6.47343	25.6584	2.80862	4.18185	5	9.42029	5	30.4322	24.1357	22.4075	2.46913	3.46077	2.49594	4.38206	4.19813	3.96538
ASHGA5P033127	0.0142744	0.0546931	2.05412	down	protein_coding	ENST00000361677	CCDS11448.1	RUNDC1	GENCODE	3828	chr17	+	41132581	41145707		AAAGAACTGATACTGCAGCTCAAGACCCAGCTAGATGACCTGGAAACGTTTGCCTATCAA	146923	Hs.632255		RUN domain containing 1 [Source:HGNC Symbol;Acc:25418]	5.84624	19.3356	2.70825	3.74677	5	7.53871	5	18.4431	20.6441	18.9196	2.46913	3.15968	2.49594	3.58155	3.94973	3.70902
ASHGA5P012509	0.00418346	0.0257814	2.29412	down	protein_coding	NM_145314	CCDS31147.1	UCMA	RefSeq	840	chr10	-	13263766	13276328		GTGGTGCTCCTGTCTATGCTGAGAGAGGGAACCAGTGTATCTGTGGGCACCATGCAGATG	221044	Hs.112998	GO:0005578|GO:0005615|GO:0016235|GO:0045668|GO:0048471	unique cartilage matrix-associated protein precursor	15.3581	63.7065	4.38102	5.57896	16.6484	18.8807	10.5451	75.139	63.0967	52.8837	4.63171	4.37657	4.13477	5.75771	5.6867	5.29247
ASHGA5P001949	0.0057579	0.0310682	2.03214	down	protein_coding	NM_014519	CCDS11068.1	ZNF232	RefSeq	2125	chr17	-	5009030	5026397		GTCCTGTGAGGGGGCCCTTGCAAGATTCCAGCTGGTATGAGCCTTCTGCAGAGCTAGTGC	7775	Hs.279914	GO:0003677|GO:0003700|GO:0005634|GO:0006351|GO:0008270|GO:0016032	zinc finger protein 232	8.69458	33.7879	3.59226	4.61526	8.02104	12.8558	5.20689	37.3391	30.3982	33.6264	3.66108	3.87354	3.24215	4.69365	4.55302	4.59909
ASHGA5P002941	0.0466197	0.11992	2.12628	down	protein_coding	NM_002349	CCDS2211.1	LY75	RefSeq	6936	chr2	-	160659867	160761267		GTGCCTCTGGGCCCTGATTACACAGCAATAGCTATCATAGTTGCCACACTAAGTATCTTA	4065	Hs.153563	GO:0004872|GO:0005887|GO:0006897|GO:0006954|GO:0006955|GO:0030246	lymphocyte antigen 75 precursor	257.684	692.555	8.05626	9.14459	176.921	330.165	265.965	870.162	772.123	435.38	7.7313	8.06267	8.3748	9.47894	9.47894	8.47587
ASHGA5P014282	0.0113876	0.0471925	2.19315	down	protein_coding	NM_001160130	CCDS55037.1	KCNQ5	RefSeq	6568	chr6	+	73331570	73908573		TGCAGCCCTACCAATCAGAAGCTAAGTTTTAAGGAGCGAGTGCGCATGGCTAGCCCCAGG	56479	Hs.445324	GO:0005242|GO:0005886|GO:0006461|GO:0007268|GO:0008076	potassium voltage-gated channel subfamily KQT member 5 isoform 2	26.625	102.101	5.14335	6.27635	27.1384	29.7074	23.0291	119.688	111.993	74.6231	5.28017	4.96607	5.18379	6.45894	6.56583	5.80427
ASHGA5P037097	0.00268446	0.0204697	2.05389	down	protein_coding	NM_005985	CCDS13423.1	SNAI1	RefSeq	1722	chr20	+	48599512	48605420		GGAAGCCCTCCGACCCCAATCGGAAGCCTAACTACAGCGAGCTGCAGGACTCTAATCCAG	6615	Hs.48029	GO:0000122|GO:0000122|GO:0000122|GO:0001078|GO:0001649|GO:0001707|GO:0001837|GO:0001837|GO:0005515|GO:0005634|GO:0005634|GO:0005737|GO:0005737|GO:0008270|GO:0010718|GO:0010718|GO:0010957|GO:0016477|GO:0019900|GO:0030335|GO:0031069|GO:0043066|GO:0043518|GO:0043565|GO:0045893|GO:0060021|GO:0060536|GO:0060707|GO:0060806|GO:0060972|GO:0061314|GO:2000810	zinc finger protein SNAI1	196.453	517.798	7.72959	8.76795	206.215	210.82	172.325	572.332	500.22	480.843	7.92339	7.45663	7.80874	8.84807	8.82586	8.62991
ASHGA5P007132	0.00247406	0.019477	2.05869	down	protein_coding	ENST00000328526	CCDS14476.2	XKRX	GENCODE	2851	chrX	-	100168430	100183898		CTGTTATCAGATGTTTGGAGGCCATGATTAAGTACCTCACACTGTGGAAGAAAGAGGAGC	402415	Hs.364911	GO:0016021|GO:0005886	XK, Kell blood group complex subunit-related, X-linked [Source:HGNC Symbol;Acc:29845]	5	16.6465	2.45604	3.49777	5	5	5	20.8907	14.8465	14.2024	2.46913	2.40305	2.49594	3.78488	3.43651	3.27192
ASHGA5P013313	0.0132684	0.0521317	2.01556	down	protein_coding	NM_174892	CCDS11700.1	CD300LB	RefSeq	2326	chr17	-	72517312	72527613		CCCACAAGAGGAACCACTACATGCTCCTGGTATTTGTGAAGGTGCCCATCTTGCTCATCT	124599	Hs.313343	GO:0005886|GO:0016021	CMRF35-like molecule 7	23.0502	81.7177	4.95317	5.96435	26.88	21.0724	21.1982	94.4907	72.9802	77.6823	5.26798	4.51415	5.07738	6.11255	5.91387	5.86664
ASHGA5P011079	0.0157112	0.0578301	2.1405	down	protein_coding	NM_153810	CCDS41570.1	CACUL1	RefSeq	6758	chr10	-	120440493	120514758		CTCAGACCAGAGTGGGTTCAGATGGCTCCAACTCTATTTTCTAAATTTATTCCAAACATT	143384	Hs.420024	GO:0000082|GO:0006511|GO:0008284|GO:0019901|GO:0031461|GO:0031625|GO:0045860	uncharacterized protein C10orf46	594.934	1438.39	9.12624	10.2242	483.32	926.819	374.664	1868.2	1309.07	1137.89	9.05689	9.47594	8.84588	10.5735	10.2172	9.88182
ASHGA5P044094	0.0233383	0.0753142	2.52411	down	protein_coding	NM_001040704	CCDS34813.1	DEFB106B	RefSeq	303	chr8	-	7340025	7343909		GCTTCTTTTTACTCTTGCCTCTGCTGTAGGCAGACACTTTAATAAAAATAAATGACTGTC	503841	Hs.511958	GO:0005576|GO:0042742	beta-defensin 106 precursor	8.74065	41.0571	3.58484	4.92061	13.2799	7.86556	5.07647	45.1576	39.5257	38.4879	4.32439	3.21586	3.21428	4.98759	4.96473	4.80952
ASHGA5P002886	0.0304839	0.090253	2.79203	down	protein_coding	NM_017734	CCDS758.1	PALMD	RefSeq	2601	chr1	+	100111430	100160097		GCATTTGAAGAAAAAGGCCTTGAGGGAGAAATGGCTTCTAGATGGAATCAGCAGCGGAAA	54873	Hs.483993	GO:0005737|GO:0008360|GO:0016020|GO:0043197	palmdelphin	609.086	1673.9	8.98418	10.4655	410.305	1166.14	250.811	1930.31	1404.52	1686.88	8.84124	9.8143	8.29698	10.6169	10.33	10.4495
ASHGA5P039129	0.0176643	0.0627426	2.06181	down	protein_coding	ENST00000327928	CCDS46948.1	OTOL1	GENCODE	1434	chr3	+	161214595	161221730		TTTTGAATTGTTGTGATTGTTGTTCACCTGTACCCGGGCAGAAAGGAGAACCTGGAGAGA	131149	Hs.585021	GO:0005581|GO:0005515	otolin 1 [Source:HGNC Symbol;Acc:34071]	5.86857	19.6573	2.71239	3.7563	5	7.60572	5	24.459	16.7519	17.7609	2.46913	3.17209	2.49594	4.03238	3.62202	3.6145
ASHGA5P011593	0.0199164	0.0679174	2.23232	down	protein_coding	NM_004089	CCDS14531.1	TSC22D3	RefSeq	1986	chrX	-	106956451	106960291		TCTCTTCTCTGCTTGGAGGGGATGTGGTTTCCGTTAAGCTGGACAACAGTGCCTCCGGAG	1831	Hs.522074	GO:0000122|GO:0003700|GO:0005634|GO:0005737|GO:0006355|GO:0006970|GO:0007589|GO:0043426|GO:0048642	TSC22 domain family protein 3 isoform 2	22.876	81.4599	4.80334	5.96188	12.3763	37.482	18.7698	81.9797	72.8638	89.5362	4.23398	5.26777	4.90827	5.89405	5.91107	6.08052
ASHGA5P038810	0.00509778	0.0288838	2.51166	down	protein_coding	NM_001166425	CCDS54587.1	GNAI2	RefSeq	2143	chr3	+	50284325	50296786		AAGCTTTCCTTCAAATGAGATGACCACAGCAGTCTTCTCTGCAGGTTGCAGGAAATGAGA	2771	Hs.77269	GO:0000186|GO:0001664|GO:0001973|GO:0003924|GO:0004871|GO:0005515|GO:0005525|GO:0005634|GO:0005737|GO:0005813|GO:0005829|GO:0005834|GO:0005886|GO:0005886|GO:0006184|GO:0006184|GO:0007049|GO:0007165|GO:0007186|GO:0007193|GO:0007194|GO:0007213|GO:0007214|GO:0007243|GO:0007268|GO:0007584|GO:0007596|GO:0008283|GO:0008284|GO:0030168|GO:0030496|GO:0031234|GO:0031683|GO:0045121|GO:0046872|GO:0050805|GO:…	guanine nucleotide-binding protein G(i) subunit alpha-2 isoform 2	5.77078	23.1815	2.69474	4.02339	5	7.31235	5	27.2939	21.8362	20.4145	2.46913	3.11916	2.49594	4.20469	4.03717	3.82829
ASHGA5P052574	0.00514328	0.029042	2.00181	down	protein_coding	NM_032122	CCDS4534.1	DTNBP1	RefSeq	1429	chr6	-	15523031	15663289		TTCAGTCCGATGAGGAGGAAGTTCAGGTGGACACTGCCCTGGCCACATCACACACTGACA	84062	Hs.571148	GO:0005515|GO:0005634|GO:0005737|GO:0005789|GO:0005829|GO:0006892|GO:0007596|GO:0008089|GO:0010008|GO:0014069|GO:0016044|GO:0016528|GO:0030054|GO:0030424|GO:0030426|GO:0030672|GO:0030672|GO:0031083|GO:0031175|GO:0031532|GO:0032438|GO:0033162|GO:0033267|GO:0042383|GO:0043005|GO:0043197|GO:0045211|GO:0048490|GO:0048812|GO:0060155|GO:0060159	dysbindin isoform a	1052.29	2415.88	9.99857	10.9999	969.327	1370.1	817.453	2228.32	1988.86	3030.46	10.0218	10.07	9.90393	10.8317	10.8213	11.3466
ASHGA5P033745	0.0300754	0.0894082	2.20033	down	protein_coding	NM_003574	CCDS11847.2	VAPA	RefSeq	6994	chr18	+	9913954	9960018		TTCAATGAGCAGCATCAACAACACAGTTGCAACACCTGCCAGTTATCACACGAAGGATGA	9218	Hs.165195	GO:0004871|GO:0005198|GO:0005515|GO:0005783|GO:0005789|GO:0005886|GO:0005923|GO:0006644|GO:0006665|GO:0006944|GO:0007165|GO:0008219|GO:0016021|GO:0030148|GO:0031175|GO:0031982|GO:0043123|GO:0044281|GO:0046982|GO:0048471|GO:0070972	vesicle-associated membrane protein-associated protein A isoform 1	78.523	233.23	6.41623	7.55396	39.0374	121.582	74.9499	272.812	213.532	213.347	5.75494	6.76315	6.73061	7.7174	7.56919	7.37528
ASHGA5P044441	0.000595504	0.00936083	2.19458	down	protein_coding	NM_198401	CCDS6287.1	ANKRD46	RefSeq	2802	chr8	-	101532999	101572014	NM_001270377, NM_001270378	GCCTGAACTGGTGCATTAAAGGAGCTCATGGAAGATGAGGCAATTAATTGCCTGTTTCCT	157567	Hs.530199	GO:0016021	ankyrin repeat domain-containing protein 46 isoform 1	360.425	927.992	8.49977	9.63372	305.323	499.403	276.548	1064.62	886.254	833.101	8.44778	8.62347	8.42807	9.77168	9.68262	9.44685
ASHGA5P014607	0.000849036	0.0110862	2.31333	down	protein_coding	NM_080683	CCDS47094.1	PTPN13	RefSeq	8573	chr4	+	87515467	87736328	NM_080685	GGCAAGCATATGTTCTAGGAATGACTATGCATAGTTCTGGAAACTCTTCATCCCAAGTAC	5783	Hs.436142	GO:0004725|GO:0005515|GO:0005634|GO:0005737|GO:0005856|GO:0005886|GO:0006470|GO:0030027|GO:0035335|GO:0035335|GO:0043005|GO:0044297	tyrosine-protein phosphatase non-receptor type 13 isoform 1	5.31057	20.2869	2.61611	3.82608	5	5.93172	5	21.0903	19.0887	20.6817	2.46913	2.88327	2.49594	3.79851	3.82897	3.85078
ASHGA5P048512	0.00063603	0.0095515	2.09672	down	protein_coding	NM_001981	CCDS557.1	EPS15	RefSeq	5220	chr1	-	51819934	51984995		ATTGATCCTCCTCACGTTCTTACTCCTGAAATGATTCCACCATCAGACAGGGCCAGTTTA	2060	Hs.83722	GO:0005509|GO:0005515|GO:0005737|GO:0005829|GO:0005886|GO:0005905|GO:0007173|GO:0008283|GO:0015031|GO:0016050|GO:0017124|GO:0030122|GO:0031901|GO:0032456|GO:0042059|GO:0043231|GO:0048268|GO:0060170	epidermal growth factor receptor substrate 15 isoform A	45.479	151.958	5.84066	6.9088	45.568	50.4863	40.3827	166.427	143.505	145.943	5.95492	5.64546	5.92162	6.9734	6.9436	6.8094
ASHGA5P052043	0.00772213	0.0368797	4.47143	down	protein_coding	NM_003360	CCDS3705.1	UGT8	RefSeq	2898	chr4	+	115543522	115598202		GTTATTACAGCTATGAAGTCTTACACTCCATATTTCATTCTCCTGTGGAGTGCTGTTGGG	7368	Hs.732504	GO:0002175|GO:0003851|GO:0006682|GO:0007010|GO:0007417|GO:0007422|GO:0008088|GO:0008489|GO:0016021|GO:0030913|GO:0048812	2-hydroxyacylsphingosine 1-beta-galactosyltransferase precursor	8.21891	58.9874	3.31242	5.47315	9.92523	9.7315	5	57.7745	61.2797	57.9079	3.94094	3.50037	2.49594	5.35718	5.63798	5.42429
ASHGA5P009865	0.0107007	0.0455291	2.18324	down	protein_coding	NM_007072	CCDS46883.1	HHLA2	RefSeq	2689	chr3	+	108021331	108097126		ACTAAAGCCTAGAACGCACCTCCTCTGCATGACTAATATGTTCTGCACAAGACATGAAGG	11148	Hs.252351	GO:0003674|GO:0005575|GO:0008150|GO:0016021	HERV-H LTR-associating protein 2 precursor	191.069	537.655	7.69943	8.8259	210.558	175.224	187.425	606.201	516.902	489.862	7.94979	7.23151	7.91699	8.93829	8.88289	8.65653
ASHGA5P036889	0.000303847	0.00676225	2.08592	down	protein_coding	NM_172109	CCDS13521.1	KCNQ2	RefSeq	1425	chr20	-	62065031	62103993		GGCACCTGCCACCAAGCAACTGTTTCATTTTTTATTTTCCATTTGTTCTTAAACCCCACT	3785	Hs.161851	GO:0005249|GO:0005267|GO:0005886|GO:0005886|GO:0006813|GO:0007268|GO:0007399|GO:0007411|GO:0008076|GO:0030506|GO:0033268|GO:0043194	potassium voltage-gated channel subfamily KQT member 2 isoform e	55.1753	177.114	6.0852	7.14588	52.6142	65.1501	47.7617	178.675	178.794	173.872	6.14215	5.97774	6.1357	7.07645	7.29157	7.06962
ASHGA5P052124	0.00157418	0.0151393	2.36665	down	protein_coding	NM_017923	CCDS3806.1	MARCH1	RefSeq	5389	chr4	-	164445449	164534776		TGCAAAACCAACCTCAAACTTCCTATATTCTCTGTTCTGCATTATAAGCAACATGACCAG	55016	Hs.592804	GO:0000209|GO:0002495|GO:0004842|GO:0005764|GO:0005765|GO:0005768|GO:0005789|GO:0005794|GO:0005886|GO:0006955|GO:0008270|GO:0016021|GO:0030659|GO:0031901|GO:0031902|GO:0032588|GO:0042287	E3 ubiquitin-protein ligase MARCH1 isoform 2	15.4668	65.6013	4.38774	5.63059	15.5795	19.8763	10.9445	70.3806	69.2388	57.1844	4.54046	4.43981	4.18295	5.65931	5.8277	5.40476
ASHGA5P021123	0.00496974	0.0284907	2.4097	down	protein_coding	NM_001145212	CCDS53679.1	SLCO2B1	RefSeq	3930	chr11	+	74862031	74917445		AGCAGTCATGGGACCCAGGATAGAGGATATGCCACAGGACTTCAAGGCTTCCCTGTGCCT	11309	Hs.7884	GO:0005886|GO:0008514|GO:0015347|GO:0016021|GO:0016324|GO:0043252|GO:0055085	solute carrier organic anion transporter family member 2B1 isoform 3	13.5877	59.9218	4.22339	5.49225	17.0697	14.1074	9.58599	65.3222	57.5772	56.8662	4.66569	3.99331	4.01117	5.54542	5.53432	5.39701
ASHGA5P043981	0.012099	0.0490636	2.11917	down	protein_coding	ENST00000409703	CCDS47735.2	FAM115C	GENCODE	4885	chr7	+	143412938	143427173		TGGGTCATCCAGCCTTGGGTAGAGAAGGAATTTGAACTCAGGAAATTCAACTCCAGAACT	285966	Hs.740689		family with sequence similarity 115, member C [Source:HGNC Symbol;Acc:26878]	1377.05	3447	10.4194	11.5029	1217.05	1559.59	1354.51	3921.31	3861.03	2558.65	10.3644	10.2505	10.6435	11.6807	11.7619	11.0662
ASHGA5P045655	0.00308878	0.022054	3.48247	down	protein_coding	NM_001013355	CCDS31119.1	OR2G6	RefSeq	951	chr1	+	248684947	248685898		AAACCCCATTATCTACACTCTGAGAAACAAAGATGTGAAAGGGGCCTTGAGGACCCTGAT	391211	Hs.553784	GO:0004930|GO:0004984|GO:0005886|GO:0016021	olfactory receptor 2G6	21.1847	120.986	4.74629	6.5464	15.1539	33.07	15.3302	134.245	135.727	92.9869	4.5035	5.10522	4.63015	6.6406	6.86152	6.13707
ASHGA5P026450	0.00094692	0.0116931	2.95818	down	protein_coding	ENST00000300190	CCDS7987.1	MS4A5	GENCODE	722	chr11	+	60197061	60215265		TTCTTAGTGCCCTGGGAGCAATAGCTGGAATCATTCTCCTCACATTTGGTTTCATCCTAG	64232	Hs.178066	GO:0016021|GO:0004872	membrane-spanning 4-domains, subfamily A, member 5 [Source:HGNC Symbol;Acc:13374]	30.5573	148.866	5.31286	6.87757	35.1197	32.182	24.3703	163.056	146.623	136.92	5.61294	5.07031	5.25532	6.94188	6.97616	6.71467
ASHGA5P007839	0.0067915	0.0342907	2.13203	down	protein_coding	NM_013365	CCDS13951.1	GGA1	RefSeq	3185	chr22	+	38004480	38029571	NM_001172687, NM_001172688	GAGGCCTTAGCGGAGATCCTGCAGGCCAATGACAACCTCACCCAGGTGATCAACCTGTAT	26088	Hs.499158	GO:0003674|GO:0005515|GO:0005794|GO:0006886|GO:0010008|GO:0016192|GO:0030131|GO:0044431	ADP-ribosylation factor-binding protein GGA1 isoform 1	5	17.4514	2.45604	3.54827	5	5	5	23.3485	13.2288	15.7769	2.46913	2.40305	2.49594	3.95916	3.26184	3.42382
ASHGA5P001249	0.000764971	0.0105787	2.64036	down	protein_coding	NM_016001	CCDS42362.1	UTP18	RefSeq	1893	chr17	+	49337896	49375292		ACTTCTCTTCCAAGAGGAATCTTGAAGATGAAGAACTGCCAGCATGCGAATGCTGAACGT	51096	Hs.709327	GO:0005634|GO:0005730|GO:0006364	U3 small nucleolar RNA-associated protein 18 homolog	608.537	1867.04	9.21749	10.6182	482.357	806.625	536.629	2154.34	1858.49	1588.28	9.05449	9.27823	9.31975	10.7736	10.7155	10.3656
ASHGA5P043608	0.00255454	0.0198747	2.25509	down	protein_coding	NM_006658	CCDS5436.1	PPP1R17	RefSeq	1966	chr7	+	31726630	31748069		AGAAGCCTAGAAAGGGAAAAAATGTACAGGCCACCCTGAATGTTGAGTCAGACCAAAAAA	10842	Hs.227011	GO:0004864|GO:0004865|GO:0005575|GO:0006468|GO:0007165|GO:0007243|GO:0007417|GO:0007610|GO:0010921	protein phosphatase 1 regulatory subunit 17 isoform 1	10.5523	45.7691	3.90408	5.07726	10.9999	12.5973	8.0596	51.9033	47.7305	37.6736	4.07586	3.84647	3.7899	5.20132	5.25394	4.77652
ASHGA5P041919	4.1889e-06	0.00177494	3.5456	down	protein_coding	NM_001243308		C6orf7	RefSeq	750	chr6	-	80513303	80580137		TAAAATTCCAAGACCCAATTCCACAGTCGTTGATGAGCATAAGCACTTCAGCCATCATCT	89758	Hs.288213		uncharacterized protein LOC89758	5	27.2221	2.45604	4.28207	5	5	5	27.8797	24.678	29.1086	2.46913	2.40305	2.49594	4.24008	4.23398	4.37216
ASHGA5P046375	0.00340816	0.0233071	2.06524	down	protein_coding	NM_022365	CCDS7136.1	DNAJC1	RefSeq	2213	chr10	-	22045476	22292650		CCATGCAAACTGGGGATTTGGTTTTGCCTTACACTAAAAGCATTACCTCACCTCATCCAG	64215	Hs.499000	GO:0001671|GO:0003677|GO:0003682|GO:0005515|GO:0005783|GO:0005783|GO:0005789|GO:0006417|GO:0006457|GO:0016021|GO:0031072|GO:0031965|GO:0032781|GO:0045861|GO:0050708|GO:0051082|GO:0051087	dnaJ homolog subfamily C member 1 precursor	403.347	991.367	8.66936	9.71567	360.857	528.679	320.506	1025.47	1128.36	820.271	8.68132	8.69363	8.63313	9.7195	10.0035	9.42401
ASHGA5P018635	0.00423067	0.0259582	2.52081	down	protein_coding	NM_052900	CCDS6316.2	CSMD3	RefSeq	12643	chr8	-	113235158	114449242		GTGGATTTAGTGCTCCCTATCAAGTGAAAAAGGCCATAGATTTTAAATCTAGAGGATTTA	114788	Hs.91381	GO:0005886|GO:0016021	CUB and sushi domain-containing protein 3 isoform 3	20.0071	83.4891	4.66717	6.00106	19.1093	29.6386	11.2734	90.5789	74.7149	85.1736	4.81358	4.96401	4.22393	6.04947	5.95164	6.00208
ASHGA5P033623	0.00221936	0.0182985	3.26589	down	protein_coding	NM_052947	CCDS11966.2	ALPK2	RefSeq	7303	chr18	-	56148481	56296189		AAACTTCTTGAGAAGAGAATCAGAAGCTGGTCAGAAATGTTGCACCTTCCAGCACTGGGT	115701	Hs.628152	GO:0004674|GO:0005524	alpha-protein kinase 2	5.49771	32.9801	2.86014	4.56762	5.85956	5.63356	5	38.2826	27.2447	33.413	3.26298	2.8215	2.49594	4.73389	4.38086	4.5881
ASHGA5P010309	0.00147712	0.0146022	3.18094	down	protein_coding	NM_021132	CCDS7328.1	PPP3CB	RefSeq	3164	chr10	-	75196562	75255782	NM_001142353	TAGCTGGAGGACGGCAGACCCTGCAAAGTGCCACAGTTGAGGCTATTGAGGCTGAAAAAG	5532	Hs.500067	GO:0001915|GO:0001975|GO:0004722|GO:0005509|GO:0005516|GO:0005516|GO:0005829|GO:0005886|GO:0005955|GO:0006468|GO:0006470|GO:0007165|GO:0007507|GO:0007612|GO:0007613|GO:0008144|GO:0016311|GO:0017156|GO:0019899|GO:0030217|GO:0030346|GO:0033192|GO:0033192|GO:0034097|GO:0035176|GO:0035690|GO:0035774|GO:0042098|GO:0042110|GO:0043029|GO:0045893|GO:0046716|GO:0046982|GO:0046983|GO:0048167|GO:0048675|GO:…	serine/threonine-protein phosphatase 2B catalytic subunit beta isoform isoform b	209.623	792.302	7.73373	9.40319	133.452	329.468	165.948	878.371	769.061	729.475	7.37481	8.06075	7.76563	9.4952	9.47404	9.24032
ASHGA5P001911	0.0200189	0.0681165	2.14932	down	protein_coding	NM_003405	CCDS13901.1	YWHAH	RefSeq	1807	chr22	+	32340478	32353590		TATGAAGGCGGTGACAGAGCTGAATGAACCTCTCTCCAATGAAGATCGAAATCTCCTCTC	7533	Hs.226755	GO:0002028|GO:0003779|GO:0005159|GO:0005515|GO:0005737|GO:0006713|GO:0006886|GO:0014704|GO:0017080|GO:0019899|GO:0019904|GO:0035259|GO:0042921|GO:0044325|GO:0045664|GO:0045893|GO:0048167|GO:0050774|GO:2000649	14-3-3 protein eta	381.004	903.999	8.47883	9.58271	219.539	635.812	287.66	1054.63	709.693	947.671	8.00717	8.94384	8.48547	9.75853	9.36071	9.6289
ASHGA5P053480	0.000669273	0.00982541	2.67951	down	protein_coding	NM_138817	CCDS34917.1	SLC7A13	RefSeq	1865	chr8	-	87226287	87242604		AAGCCATCTTCCAAGGATATTTTGCATATTCAGGCGGGGCATGCTTTACACTTATAGCAG	157724	Hs.149095	GO:0015171|GO:0016021	solute carrier family 7 member 13	5	21.0556	2.45604	3.87801	5	5	5	19.4648	23.5744	20.1275	2.46913	2.40305	2.49594	3.66938	4.15972	3.80494
ASHGA5P003329	0.0196092	0.0672241	2.45568	down	protein_coding	NM_004570	CCDS44839.1	PIK3C2G	RefSeq	4848	chr12	+	18414473	18801352		GGGTGCACAGGATCAATTTTCCCCTTGAAATAAAGTCACTTCCAAGGGAATCCATGCTCA	5288	Hs.22500	GO:0005524|GO:0005829|GO:0006644|GO:0006661|GO:0006935|GO:0008150|GO:0016020|GO:0016303|GO:0016307|GO:0035005|GO:0035091|GO:0036092|GO:0044281|GO:0048015	phosphatidylinositol 4-phosphate 3-kinase C2 domain-containing subunit gamma	5.7391	23.0235	2.69001	3.98613	5	7.21729	5	17.0692	27.1565	24.8448	2.46913	3.10497	2.49594	3.4578	4.37667	4.12393
ASHGA5P010068	6.94191e-05	0.00351322	2.47323	down	protein_coding	NM_139017	CCDS3970.2	IL31RA	RefSeq	2704	chr5	+	55147206	55213165	NM_001242637	GCAAAACATTCTCTCTCCCCAGCCTTCATGTGTTAACCTGGGGATGATGTGGACCTGGGC	133396	Hs.55378	GO:0000165|GO:0003713|GO:0004896|GO:0005886|GO:0006952|GO:0007169|GO:0007259|GO:0008284|GO:0016021|GO:0019221|GO:0019901|GO:0019955|GO:0030224|GO:0030225|GO:0042517|GO:0042523|GO:0042592|GO:0043031|GO:0045893	interleukin-31 receptor subunit alpha isoform 1	1608.87	4558.74	10.6294	11.9358	1484.6	1992.64	1349.38	4638.48	4026.08	5011.67	10.6457	10.6063	10.6362	11.9082	11.8207	12.0785
ASHGA5P050175	1.41498e-05	0.00221638	2.30739	down	protein_coding	NM_001039876	CCDS42553.1	SYNE4	RefSeq	1541	chr19	-	36494001	36499672		CGAGACTCCATCTTCCGGCGGCTCTGGCAGCTGCAGGCCCAGCTGGTCAGCTACAGCCTG	163183	Hs.436743	GO:0003779|GO:0031309|GO:0045198	nesprin-4	91.1806	297.761	6.73323	7.93949	82.4854	111.754	79.3024	313.27	279.759	300.254	6.73242	6.65754	6.80973	7.94162	7.96915	7.9077
ASHGA5P046685	0.0266529	0.0825001	2.08681	down	protein_coding	NM_032461	CCDS44006.1	SPANXB1	RefSeq	472	chrX	+	140084755	140085871		TAGACATCGAAGAACCAATATATACAATGGGCCAACAATCCAGTGTCCGCAGGCTGAAGA	728695	Hs.711489		sperm protein associated with the nucleus on the X chromosome B/F	5.7879	22.4336	2.91854	3.97985	7.20404	5.15966	5	24.5961	21.255	21.4497	3.51607	2.74362	2.49594	4.03961	3.99721	3.90272
ASHGA5P049285	0.0193704	0.0667084	2.74069	down	protein_coding	NM_001033081	CCDS30682.1	MYCL1	RefSeq	3624	chr1	-	40361095	40367687		CCTCCCGCAGGGAGCGGACATGGACTACGACTCGTACCAGCACTATTTCTACGACTATGA	4610	Hs.437922	GO:0003677|GO:0003677|GO:0003700|GO:0005634|GO:0006355|GO:0046983	protein L-Myc-1 isoform 1	6.7473	27.8424	2.84745	4.30199	5	10.2419	5	31.2541	22.1821	30.091	2.46913	3.57729	2.49594	4.42436	4.06084	4.42077
ASHGA5P054036	0.00828492	0.0387275	2.00634	down	protein_coding	NM_002646	CCDS1446.1	PIK3C2B	RefSeq	7606	chr1	-	204391757	204459474		TGACATCTATGTTCTCCTGAAGCAGTGGACCCACATGAACCACCAGGATGCCCTGGGGCT	5287	Hs.497487	GO:0001727|GO:0005515|GO:0005524|GO:0005634|GO:0005783|GO:0005829|GO:0005829|GO:0005886|GO:0006644|GO:0006661|GO:0008150|GO:0030139|GO:0035005|GO:0035091|GO:0043231|GO:0043491|GO:0044281|GO:0048015	phosphatidylinositol 4-phosphate 3-kinase C2 domain-containing subunit beta	15.2525	56.4616	4.39148	5.39605	18.4508	15.5881	11.7184	60.5001	47.9816	60.9031	4.76977	4.1234	4.28128	5.42688	5.26251	5.49876
ASHGA5P003105	5.89039e-06	0.00180355	3.24842	down	protein_coding	NM_004341	CCDS1742.1	CAD	RefSeq	7108	chr2	+	27440257	27466654		TATGCCTTGAACCCTGAGTCTGAGCAGTATTACATCATTGAAGTGAATGCCAGGCTCTCT	790	Hs.377010	GO:0004070|GO:0004070|GO:0004088|GO:0004088|GO:0004151|GO:0004151|GO:0004672|GO:0005524|GO:0005634|GO:0005829|GO:0005829|GO:0006206|GO:0006207|GO:0006541|GO:0006543|GO:0016363|GO:0017144|GO:0018107|GO:0019899|GO:0042802|GO:0042995|GO:0043025|GO:0043195|GO:0044205|GO:0044281|GO:0046134|GO:0046777|GO:0046872|GO:0055086|GO:0070335|GO:0070409	CAD protein	5	25.1529	2.45604	4.15578	5	5	5	26.3241	22.4388	26.6957	2.46913	2.40305	2.49594	4.15055	4.07896	4.23783
ASHGA5P013268	0.00015212	0.005002	2.59885	down	protein_coding	NM_001164695	CCDS55066.1	IYD	RefSeq	7480	chr6	+	150690027	150725765		ATTGATTTCCTTCCTGAATCTGTAAGCAGAATGCAGGTCTGGTGACTGTCACTACCACTC	389434	Hs.310225	GO:0005886|GO:0006590|GO:0016021|GO:0016491|GO:0034641|GO:0044281	iodotyrosine dehalogenase 1 isoform 3	10.7914	53.7562	3.93899	5.31687	10.1573	13.0614	9.15551	62.6059	44.5809	54.0818	3.97133	3.89315	3.9525	5.4799	5.14835	5.32235
ASHGA5P031588	0.011891	0.0484566	2.27146	down	protein_coding	NM_001010845	CCDS32401.1	ACSM2A	RefSeq	2969	chr16	+	20462858	20498991		AAATGAAAGGCCGTGGCACCTTCTTATACCCTAGAAGAAGACCTCCATACAGGAAGACTT	123876	Hs.298252	GO:0005524|GO:0005739|GO:0005759|GO:0006631|GO:0036112|GO:0042593|GO:0046872|GO:0047760|GO:0070328	acyl-coenzyme A synthetase ACSM2A, mitochondrial	9.91963	41.7699	3.7566	4.94022	10.0075	14.2315	5.51992	35.7811	43.127	46.4017	3.95206	4.00272	3.31504	4.62966	5.1016	5.08941
ASHGA5P009412	0.000224171	0.00587604	3.0555	down	protein_coding	NM_080574	CCDS13214.1	BPIFA2	RefSeq	1054	chr20	+	31755959	31769223		TCCTCTAAACGCGTGTCAAGACAAAAGATGCTTCAGCTTTGGAAACTTGTTCTCCTGTGC	140683	Hs.125960	GO:0005576|GO:0008289	BPI fold-containing family A member 2 precursor	5	23.9196	2.45604	4.06745	5	5	5	29.1777	20.5315	22.0495	2.46913	2.40305	2.49594	4.31596	3.9435	3.94289
ASHGA5P010740	0.0417727	0.111349	2.2335	down	protein_coding	NM_018203	CCDS30985.1	KLHDC8A	RefSeq	2500	chr1	-	205305647	205326039		ATGCTGCGTGAGGCCGCCATGGGCATTTCTGTCACGGCCAAAGATTACCGAGTATATGCG	55220	Hs.10414		kelch domain-containing protein 8A	6.3437	26.0069	3.05102	4.21032	5	6.01275	8.01834	27.9294	25.7899	24.3013	2.46913	2.89934	3.78458	4.24323	4.2995	4.08824
ASHGA5P007723	0.0061169	0.0322484	3.49357	down	protein_coding	NM_019859	CCDS7408.1	HTR7	RefSeq	3378	chr10	-	92500575	92617671		TACAATCTCCAGACCATCACAATTGGTTAGCAGACAAAATGCTGACTACTGTAGAAAAAA	3363	Hs.73739	GO:0004993|GO:0005886|GO:0005887|GO:0007187|GO:0007192|GO:0007268|GO:0007623|GO:0008015|GO:0030594	5-hydroxytryptamine receptor 7 isoform d	6.28927	33.2308	2.78271	4.58741	5	8.86782	5	31.6382	38.1544	29.8998	2.46913	3.38305	2.49594	4.44215	4.90998	4.4101
ASHGA5P002731	0.00452733	0.0269057	2.00261	down	protein_coding	NM_014637	CCDS6182.1	MTFR1	RefSeq	2740	chr8	+	66556887	66622798	NM_001145838	GAGAGTGTTGTTTGGGCCACACATGTTGAAGCCAACAGGAAAAATGAAGGCTTTAATTGA	9650	Hs.584788	GO:0000266|GO:0005739|GO:0005886|GO:0007005|GO:0009060	mitochondrial fission regulator 1 isoform 1	1638.5	3741.16	10.6424	11.6443	1297.25	2183.32	1434.93	4235.22	3955.46	3032.8	10.4607	10.7418	10.7247	11.7882	11.7973	11.3473
ASHGA5P037678	0.000164955	0.00518875	2.28482	down	protein_coding	NM_006078	CCDS13931.1	CACNG2	RefSeq	4523	chr22	-	36956915	37098690		AGCAAAAAGAACGAGGAAGTTATGACCCATTCCGGATTATGGAGAACCTGCTGCCTAGAA	10369	Hs.146766	GO:0005245|GO:0005515|GO:0005886|GO:0005891|GO:0006810|GO:0007268|GO:0007528|GO:0030666|GO:0032281|GO:0051899|GO:0060081|GO:2000311	voltage-dependent calcium channel gamma-2 subunit	5	18.2213	2.45604	3.64812	5	5	5	18.0187	16.4529	20.1922	2.46913	2.40305	2.49594	3.5395	3.59466	3.81021
ASHGA5P007357	0.00720456	0.0355215	2.07563	down	protein_coding	NM_001031709	CCDS31239.1	RNLS	RefSeq	2420	chr10	-	90043858	90343082		CAAAAATGGAGACATTCACAGGTTACAAATGCTGCTGCCAACTGTCCTGGCCAAATGACT	55328	Hs.149849	GO:0005576|GO:0016491	renalase isoform 1 precursor	590.864	1459.64	9.20049	10.254	575.207	684.934	512.449	1704.19	1550.21	1124.52	9.29342	9.05221	9.25583	10.4351	10.4616	9.86539
ASHGA5P018038	0.000277218	0.00646544	2.44835	down	protein_coding	ENST00000448662	CCDS54825.1	SORBS2	GENCODE	4356	chr4	-	186506597	186732048		TGAAAGACCACCTCCTAAAAAGCCTCTGGACTATGTTCAAGATCATTCTTCTGGTGTTTT	8470	Hs.655143	GO:0005515	sorbin and SH3 domain containing 2 [Source:HGNC Symbol;Acc:24098]	28.5451	118.849	5.23115	6.52296	24.761	33.9926	26.8815	122.973	101.706	131.867	5.15673	5.14282	5.39391	6.49823	6.41515	6.65551
ASHGA5P028384	0.00161045	0.0152708	2.50551	down	protein_coding	ENST00000435159		TMEM132C	GENCODE	4947	chr12	+	128751947	129192460		ACCCTTTTCTGTGGAGAAGGTTGTGCCTCTGGACTTGATGTTGACTTCAAACTTTTTAGG	92293	Hs.49599	GO:0008150|GO:0016021|GO:0005575|GO:0003674	transmembrane protein 132C [Source:HGNC Symbol;Acc:25436]	14.5019	65.7347	4.30296	5.62807	15.1178	18.3877	10.0003	78.2185	61.639	57.3466	4.50074	4.33825	4.06991	5.82667	5.64855	5.40899
ASHGA5P007028	0.000266814	0.00636406	2.39465	down	protein_coding	NM_006770	CCDS2124.1	MARCO	RefSeq	1853	chr2	+	119699744	119752236		TTTCGAAATCAATGTTCCAAAGCCCAAGAGGAGAAATGGGGTGAACTTCTCCCTAGCTGT	8685	Hs.67726	GO:0002221|GO:0004888|GO:0005044|GO:0005581|GO:0005887|GO:0007166|GO:0008329|GO:0045087	macrophage receptor MARCO	27.5214	111.495	5.17023	6.43004	28.6289	33.0451	20.89	111.425	101.51	121.549	5.34736	5.10461	5.05871	6.3489	6.41167	6.52956
ASHGA5P018850	0.000747332	0.0104018	2.16324	down	protein_coding	NM_016006	CCDS2711.1	ABHD5	RefSeq	5370	chr3	+	43732374	43764217		AGACTCCAAGTGGTGAGACAGCTTTCAAGAATATGACTATTCCTTATGGATGGGCAAAAA	51099	Hs.19385	GO:0003841|GO:0004806|GO:0005811|GO:0005829|GO:0006629|GO:0006631|GO:0006654|GO:0010891|GO:0010898|GO:0019433|GO:0030154|GO:0042171|GO:0044281|GO:0051006	1-acylglycerol-3-phosphate O-acyltransferase ABHD5	1635.26	4071.71	10.6579	11.7711	1453.56	1996.96	1455.25	4448.41	4314.32	3452.41	10.6164	10.6092	10.748	11.8482	11.9128	11.5522
ASHGA5P011554	0.00586039	0.031355	2.06695	down	protein_coding	NM_022779	CCDS6951.1	DDX31	RefSeq	3285	chr9	-	135469675	135545788		TCCAGTGAGAGGAGGGTCTCCTGGGCAAAGAAAGCTCTGCAGTCCTTCATCCAAGCCTAC	64794	Hs.660767	GO:0003723|GO:0005524|GO:0005730|GO:0008026	probable ATP-dependent RNA helicase DDX31 isoform 1	29.6781	100.469	5.21842	6.26592	22.0107	44.22	22.8036	93.7165	86.0337	121.655	4.99768	5.48462	5.17296	6.10033	6.16614	6.53131
ASHGA5P008701	0.00165071	0.0154135	2.51093	down	protein_coding	NM_024894	CCDS1673.2	NOL10	RefSeq	3515	chr2	-	10710891	10830113	NM_001261392, NM_001261394	AAGTCCCTTCCTGAGTGGCTTTCTGATAGGAAGAAGAGAGCGCTACAGAAGAAAGATGTA	79954	Hs.222494	GO:0005730	nucleolar protein 10 isoform 1	61.6655	221.127	6.14373	7.47196	48.6522	95.9827	40.3616	250.249	190.957	222.174	6.04309	6.46682	5.92129	7.59044	7.39337	7.43206
ASHGA5P006649	0.0460257	0.118788	2.24219	down	protein_coding	NM_005528	CCDS41666.1	DNAJC4	RefSeq	1300	chr11	+	63997752	64001753		ATCATCACAGCCTTCTACAACGAAGCCCGGGCACGGGCCAGGGCCAACAGAGGCATCCTT	3338	Hs.172847	GO:0006457|GO:0006986|GO:0016020|GO:0016021|GO:0031072|GO:0051082	dnaJ homolog subfamily C member 4	429.245	1162.86	8.68146	9.84637	348.901	667.967	270.866	971.74	701.32	1815.52	8.63046	9.01448	8.39945	9.63702	9.34356	10.5585
ASHGA5P055513	0.0122605	0.049477	2.31017	down	protein_coding	ENST00000376132	CCDS41257.1	PRAMEF13	GENCODE	2164	chr1	-	13447413	13452656	ENST00000240189	TTTTCTCCAGGTGCCATCATTCCATGTCAGATAATGAACTCGAAGGACGGTTAGTCACCA	400736	Hs.531192		PRAME family member 13 [Source:HGNC Symbol;Acc:13262]	8.64636	40.0318	3.65182	4.85981	9.28826	7.6468	9.00402	50.0672	33.252	36.7764	3.84629	3.17751	3.93165	5.14595	4.69334	4.74015
ASHGA5P044602	1.13966e-05	0.00216313	2.90598	down	protein_coding	NM_013432	CCDS34968.2	TONSL	RefSeq	4519	chr8	-	145654162	145669812		TTGCTGCAGGCACAGGCTGCCTTTGAGAAGAGCTTGGCTATTGTGGATGAGGAGCTGGAG	4796	Hs.675285	GO:0000724|GO:0003714|GO:0005515|GO:0005634|GO:0005662|GO:0005730|GO:0005737|GO:0031297|GO:0035101|GO:0042393|GO:0042555|GO:0042994|GO:0043596	tonsoku-like protein	5	22.6272	2.45604	3.99507	5	5	5	22.6495	22.5011	22.7311	2.46913	2.40305	2.49594	3.91126	4.08477	3.98917
ASHGA5P050043	4.12859e-06	0.00177494	2.41002	down	protein_coding	NM_203304	CCDS32865.2	MEX3D	RefSeq	2863	chr19	-	1554667	1568057		CAGGCCATTCATATCTTTTCCTAGAGCGCGGACCACCACGTGGCCGGGGCCATCTGCGGG	399664	Hs.436495	GO:0005634|GO:0008270|GO:0010609|GO:0017091|GO:0048471|GO:0061157	RNA-binding protein MEX3D isoform 1	5	19.0366	2.45604	3.72509	5	5	5	19.7576	18.4029	18.9494	2.46913	2.40305	2.49594	3.69204	3.77185	3.71137
ASHGA5P013061	0.0313348	0.0920158	2.12692	down	protein_coding	NM_005862	CCDS3090.1	STAG1	RefSeq	5166	chr3	-	136055998	136471245		AACAGGAATGAACTACATGAAAGTGAGAACTGGAGTGAGGCATGCTGTTCGGGGTCTAAT	10274	Hs.412586	GO:0000087|GO:0000236|GO:0000278|GO:0000775|GO:0000785|GO:0005515|GO:0005634|GO:0005654|GO:0007059|GO:0007091|GO:0030054|GO:0051301	cohesin subunit SA-1	297.834	695.285	8.10543	9.1942	172.545	533.947	187.012	863.017	571.436	651.401	7.69794	8.70471	7.91364	9.46423	9.03212	9.08624
ASHGA5P056006	1.16579e-05	0.00216313	2.23747	down	protein_coding	NM_054016	CCDS30630.1	SRSF10	RefSeq	3056	chr1	-	24295572	24306953	NM_001191005	TCACGTTCTAGGTCTGCATCTCACACCAAAACTAGAGGCACCTCTAAAACAGATTCCAAA	10772	Hs.3530	GO:0000166|GO:0000244|GO:0000375|GO:0000398|GO:0003723|GO:0005515|GO:0005634|GO:0005654|GO:0005737|GO:0006355|GO:0006376|GO:0006406|GO:0016482|GO:0016607|GO:0048025|GO:0050733|GO:0051082	serine/arginine-rich splicing factor 10 isoform 2	4728.49	11705.2	12.1698	13.3316	4295.85	5985.64	3903.98	11909.5	12052.1	11154.1	12.1161	12.2503	12.1429	13.3161	13.3606	13.3182
ASHGA5P041663	0.000426023	0.00787979	2.00837	down	protein_coding	NM_001032280	CCDS34337.1	TFAP2A	RefSeq	3808	chr6	-	10396915	10412607		TTTTTCCACCCTGACTCGTTACCCCAGACTCTTCGCAGATGTTAGTTCACAGTTTTTCAG	7020	Hs.519880	GO:0000122|GO:0000976|GO:0000978|GO:0000979|GO:0000981|GO:0000982|GO:0000987|GO:0001077|GO:0001078|GO:0001822|GO:0003404|GO:0003409|GO:0003682|GO:0003713|GO:0005515|GO:0005634|GO:0005634|GO:0005730|GO:0005737|GO:0005794|GO:0005813|GO:0006366|GO:0007605|GO:0008285|GO:0010628|GO:0010842|GO:0010944|GO:0010944|GO:0021559|GO:0021623|GO:0030501|GO:0035115|GO:0042472|GO:0042803|GO:0043066|GO:0043231|GO:…	transcription factor AP-2-alpha isoform b	101.356	283.056	6.84951	7.85553	92.6971	134.117	77.2531	313.971	273.218	261.979	6.88727	6.88814	6.77312	7.94453	7.93755	7.68452
ASHGA5P035376	0.00293679	0.0214623	2.01369	down	protein_coding	NM_207421		PADI6	RefSeq	2346	chr1	+	17698740	17728195		AACCCTGCTGATGTGGGCCAGCAACTTGAGGACAAGAAAACCAAGAAAGTGATCTTTTCA	353238	Hs.531598	GO:0004668|GO:0005509|GO:0005634|GO:0005737|GO:0018101	protein-arginine deiminase type-6	13.5788	52.0611	4.25396	5.2638	12.7369	15.1739	12.8255	57.2645	40.8651	58.0537	4.26934	4.08449	4.40808	5.3446	5.01898	5.42783
ASHGA5P002698	0.0478996	0.122238	2.07583	down	protein_coding	ENST00000261937	CCDS4457.1	FLT4	GENCODE	5857	chr5	-	180028505	180076624		ACAAGAAAGCGGCTTCAGCTGTAAAGGACCTGGCCAGAATGTGGCTGTGACCAGGGCACA	2324	Hs.646917	GO:0043066|GO:0018108|GO:0008284|GO:0007169|GO:0006468|GO:0070374|GO:0001938|GO:0046330|GO:0046777|GO:0010575|GO:0043410|GO:0001934|GO:0002040|GO:0030307|GO:0048514|GO:0001946|GO:0048010|GO:0060312|GO:0035924|GO:0001944|GO:0010595|GO:0038084|GO:0001945|GO:0090037|GO:0005634|GO:0005737|GO:0005886|GO:0005576|GO:0005887|GO:0005515|GO:0005524|GO:0004672|GO:0004714|GO:0004713|GO:0019903|GO:0016772|GO:…	fms-related tyrosine kinase 4 [Source:HGNC Symbol;Acc:3767]	7.4069	26.6787	3.19591	4.24959	5	11.1329	6.08781	29.696	23.737	26.6032	2.46913	3.68335	3.43525	4.34462	4.17113	4.23303
ASHGA5P028055	0.00191378	0.0167593	2.22856	down	protein_coding	NM_001005490	CCDS31816.1	OR6C74	RefSeq	939	chr12	+	55641071	55642010		GTTGCCCCCATGTTGAATCCCTTTATTTATACACTGAGAAACAAACAAGTAAAAGATGTT	254783	Hs.554556	GO:0004930|GO:0004984|GO:0005886|GO:0016021	olfactory receptor 6C74	60.2779	205.306	6.20962	7.36574	58.1311	63.8497	58.853	230.469	196.07	189.38	6.27197	5.94959	6.40732	7.46588	7.43103	7.2003
ASHGA5P002068	0.047348	0.12126	2.42956	down	protein_coding	NM_014649	CCDS32879.1	SAFB2	RefSeq	3334	chr19	-	5587009	5622938		ATGATCTCCGTAGAGAAGGCCAAAAATGAGCCTGCTGGGAAAAAGCTTTCCGACAGAAAA	9667	Hs.655392	GO:0000166|GO:0003677|GO:0003723|GO:0005515|GO:0005634|GO:0005737|GO:0006351|GO:0006355	scaffold attachment factor B2	318.305	952.679	8.30781	9.5885	371.385	400.988	182.542	1063.95	1235.92	558.165	8.71742	8.33043	7.87558	9.76996	10.1398	8.85578
ASHGA5P010654	0.00117783	0.0130205	2.39775	down	protein_coding	NM_004578	CCDS31050.1	RAB4A	RefSeq	1861	chr1	+	229406878	229440518		AAATATGGGATACAGCAGGACAAGAACGATTCAGGTCCGTGACGAGAAGTTATTACCGAG	5867	Hs.296169	GO:0001671|GO:0003924|GO:0005515|GO:0005525|GO:0005829|GO:0005886|GO:0007264|GO:0008565|GO:0019003|GO:0019905|GO:0030100|GO:0032593|GO:0035255|GO:0051117|GO:0055037	ras-related protein Rab-4A	1373.08	3697.87	10.3736	11.6353	1147.99	1896.88	1074.37	3922.76	2965.07	4205.78	10.2722	10.5272	10.3214	11.6815	11.388	11.8364
ASHGA5P042415	0.0184111	0.0645149	2.10674	down	protein_coding	ENST00000373674	CCDS34440.1	PI16	GENCODE	2190	chr6	+	36922208	36932613	NM_001199159	AAATCAGCAGACAAAGTGACAGACAAAACAAAAGTGCCCTCTAGGAGCCCAGAGAACTCT	221476	Hs.25391	GO:0016021|GO:0005576|GO:0030414	peptidase inhibitor 16 [Source:HGNC Symbol;Acc:21245]	11.4373	45.4255	4.00014	5.07515	15.1295	10.2055	8.97683	49.6478	44.8084	41.8203	4.50168	3.57128	3.92745	5.13283	5.15528	4.93735
ASHGA5P044210	0.000212593	0.00575408	2.20904	down	protein_coding	ENST00000358138	CCDS6108.1	C8orf86	GENCODE	2250	chr8	-	38368351	38386180		GGTTTCTTCAAAAACACAGCAGCCCACAGTGATCTCTCATTCTTCCATTTCTATCACATT	389649	Hs.546586		chromosome 8 open reading frame 86 [Source:HGNC Symbol;Acc:33774]	48.4043	167.446	5.91832	7.06174	44.43	56.4293	44.3536	173.195	164.152	164.992	5.92387	5.79154	6.03956	7.02916	7.16533	6.99074
ASHGA5P009352	0.00032013	0.006918	3.24707	down	protein_coding	NM_182909	CCDS43117.1	FILIP1L	RefSeq	3962	chr3	-	99551987	99833349		ACAATCACAAATTACAGTGGAACCACTTCTTCTGCCTCATTGAACTCAACATCCTTCAGA	11259	Hs.104672	GO:0003674|GO:0005634|GO:0005737|GO:0008150|GO:0016020|GO:0016459	filamin A-interacting protein 1-like isoform 1	22.386	123.745	4.89659	6.59572	16.9568	27.7477	22.4534	130.981	118.564	121.691	4.65764	4.88064	5.15147	6.60222	6.65291	6.53204
ASHGA5P013690	0.000229175	0.00595249	2.02305	down	protein_coding	NM_004196	CCDS9699.1	CDKL1	RefSeq	1177	chr14	-	50796719	50862617		ACCCTAAGAAAGAGCCGAAAGCACCACTGCTTTACAGAAACATCCAAGTTGCAGTACCTA	8814	Hs.679430	GO:0004693|GO:0005524|GO:0005634|GO:0005737|GO:0006468|GO:0007049	cyclin-dependent kinase-like 1	130.993	355.505	7.18106	8.19759	114.549	177.64	100.789	380.808	297.627	388.08	7.18233	7.24807	7.11279	8.23745	8.06022	8.29511
ASHGA5P053616	0.00122719	0.0133111	2.56943	down	protein_coding	NM_025251	CCDS34971.1	ARHGAP39	RefSeq	5147	chr8	-	145754562	145838888		ACACTAAGAAGAAGTCCAAATTGAGAAAGAAACCCAAGCCTTATGTTGAAGAGCCGGATG	80728	Hs.148988	GO:0005634|GO:0005829|GO:0005856|GO:0007264|GO:0007411|GO:0051056	rho GTPase-activating protein 39	5	20.3772	2.45604	3.81749	5	5	5	23.2151	21.4545	16.4619	2.46913	2.40305	2.49594	3.95072	4.01144	3.49031
ASHGA5P028362	0.0105478	0.0451054	2.11282	down	protein_coding	NM_207437	CCDS9255.2	DNAH10	RefSeq	13716	chr12	+	124247041	124420267		TTGAAACTTGGGATTGAGAACAAAGCGATGATCTTTCTGTTCACGGATGCCCATGTGGCT	196385	Hs.622654	GO:0003777|GO:0005524|GO:0005737|GO:0005874|GO:0007018|GO:0016887|GO:0030286|GO:0035085	dynein heavy chain 10, axonemal	5	17.2966	2.45604	3.53521	5	5	5	23.55	15.1703	13.1696	2.46913	2.40305	2.49594	3.97337	3.47009	3.16216
ASHGA5P001713	0.00214336	0.0179457	3.38692	down	protein_coding	NM_000493	CCDS5105.1	COL10A1	RefSeq	3307	chr6	-	116440084	116447296		CAGCACGCAGAATCCATCTGAGAATATGCTGCCACAAATACCCTTTTTGCTGCTAGTATC	1300	Hs.520339	GO:0001501|GO:0005576|GO:0005581|GO:0005788|GO:0005938|GO:0030198|GO:0046872	collagen alpha-1(X) chain precursor	5.4323	33.5834	2.85164	4.61161	6.09295	5.20395	5	32.3768	32.2014	36.1721	3.30821	2.75077	2.49594	4.477	4.64405	4.7138
ASHGA5P009633	0.00128134	0.0136692	2.36216	down	protein_coding	NM_032452	CCDS9603.1	JPH4	RefSeq	4404	chr14	-	24037243	24048009	NM_001146028	CCGCTGCCAGGGCAGCAGACGCCCTCCTAAAGGCAGTGGCAGCCAGCAGTGTCGCTGAGA	84502	Hs.597841	GO:0005886|GO:0014701|GO:0016021|GO:0060314|GO:0060402	junctophilin-4	32.0436	123.19	5.3403	6.58041	23.8037	45.381	26.946	118.72	109.973	140.877	5.1058	5.51925	5.39586	6.44562	6.53743	6.75818
ASHGA5P051404	0.00408419	0.0254928	2.26412	down	protein_coding	NM_006699	CCDS895.1	MAN1A2	RefSeq	5388	chr1	+	117910084	118068320		AACACCACACTTTCAGGTAATCCTGCTGTTCGATGAAAGCAGTTCCAGAAGGACCATTCT	10905	Hs.435938	GO:0000139|GO:0004571|GO:0005509|GO:0005730|GO:0005794|GO:0006491|GO:0007585|GO:0016020|GO:0016021|GO:0018279|GO:0043687|GO:0044267|GO:0048286	mannosyl-oligosaccharide 1,2-alpha-mannosidase IB	293.632	816.993	8.25402	9.43297	254.604	366.603	259.689	975.935	840.594	634.452	8.20948	8.21163	8.34095	9.64517	9.60907	9.04467
ASHGA5P005165	0.000506121	0.00867098	2.80088	down	protein_coding	NM_018492	CCDS6063.1	PBK	RefSeq	1899	chr8	-	27667137	27695349		ATGAAAATATGACTGTGACTGACCCTGAGGCTTGTTACATTGGCACAGAGCCATGGAAAC	55872	Hs.104741	GO:0004674|GO:0005515|GO:0005524|GO:0005575|GO:0006468|GO:0007067	lymphokine-activated killer T-cell-originated protein kinase	3217.66	10048.3	11.604	13.0898	2746.93	4009.48	2896.56	11361.4	10511	8272.37	11.4649	11.6449	11.702	13.2406	13.1888	12.8401
ASHGA5P020935	0.000929726	0.0116135	2.48574	down	protein_coding	NM_001145287	CCDS55071.1	OPRM1	RefSeq	2949	chr6	+	154407641	154440594		CTAAATTAAGATACACCAAGATGAAGACTGCCACCAACATCTACATTTTCAACCTTGCTC	4988	Hs.2353	GO:0001965|GO:0004930|GO:0004979|GO:0005245|GO:0005515|GO:0005783|GO:0005794|GO:0005886|GO:0005887|GO:0007187|GO:0007191|GO:0007193|GO:0007194|GO:0007200|GO:0007204|GO:0007600|GO:0007610|GO:0007626|GO:0008285|GO:0019233|GO:0033554|GO:0038047|GO:0043950|GO:0043951|GO:0045019|GO:0045429|GO:0048149|GO:0050769|GO:0050795|GO:0051481|GO:0061358|GO:0070374|GO:0071315|GO:2000310	mu-type opioid receptor isoform MOR1-K1	11.4912	53.7491	4.01941	5.33309	9.07813	13.7151	11.6804	54.3103	54.7886	52.1486	3.82055	3.96019	4.2775	5.26777	5.46164	5.26986
ASHGA5P001703	0.00209862	0.0177222	2.15726	down	protein_coding	NM_000053	CCDS41892.1	ATP7B	RefSeq	6655	chr13	-	52506805	52585630	NM_001243182	AATCTCATCTTCTTTATCTTGTGTACCTTTGTCCAGCTCCTCGGTGGGTGGTACTTCTAC	540	Hs.492280	GO:0000139|GO:0004008|GO:0004008|GO:0005507|GO:0005515|GO:0005524|GO:0005739|GO:0005770|GO:0005802|GO:0005887|GO:0006754|GO:0006825|GO:0006878|GO:0006882|GO:0007595|GO:0015677|GO:0015680|GO:0016023|GO:0016323|GO:0034220|GO:0046688|GO:0048471|GO:0051208|GO:0055085	copper-transporting ATPase 2 isoform a	62.1499	203.287	6.24639	7.35558	68.666	65.639	52.1446	214.723	197.216	197.923	6.50078	5.98773	6.25065	7.36143	7.44069	7.26464
ASHGA5P006298	0.000249263	0.00618436	2.4945	down	protein_coding	NM_006982	CCDS9028.1	ALX1	RefSeq	1320	chr12	+	85674035	85695561		TTTTGCCAAGGACTGACAGCTACCCACAGATTCAGAACAATTTGTGGGCAGGAAATGCAA	8092	Hs.41683	GO:0000122|GO:0001502|GO:0001843|GO:0003700|GO:0003714|GO:0005515|GO:0005634|GO:0005667|GO:0006366|GO:0007275|GO:0007420|GO:0009952|GO:0014031|GO:0030326|GO:0043565|GO:0045893|GO:0045944|GO:0046982|GO:0048704|GO:0060021	ALX homeobox protein 1	781.213	2235.92	9.57258	10.8913	703.307	973.783	666.549	2464.5	2271.32	1971.94	9.57004	9.54258	9.60512	10.992	11.0016	10.6804
ASHGA5P005813	0.000766759	0.0105899	4.07284	down	protein_coding	NM_178128	CCDS54163.1	FADS6	RefSeq	2052	chr17	-	72873472	72889705		ATCTGGCTGCTTTTCTTTGTGGAGGTGTGCACAGCCTTCACTGCAGAGCACGCCACGCAT	283985	Hs.448845	GO:0006633|GO:0016021|GO:0016491	fatty acid desaturase 6	5.721	36.0788	2.68717	4.7132	5	7.16299	5	41.7765	32.8166	33.6433	2.46913	3.09643	2.49594	4.86601	4.67326	4.60034
ASHGA5P006720	0.00986723	0.0432342	2.06273	down	protein_coding	NM_203394	CCDS9016.1	E2F7	RefSeq	5742	chr12	-	77415025	77459360		TGCAGTCTCCTGCAGGATTAAATGGTTTCAATGTACTTTTATCTGGCAGTCAAACCCCCC	144455	Hs.416375	GO:0003677|GO:0003700|GO:0005667|GO:0006351|GO:0007049|GO:0008285|GO:0042802	transcription factor E2F7	5.73137	19.1425	2.68872	3.73328	5	7.19412	5	18.6437	20.0896	18.6942	2.46913	3.10108	2.49594	3.59788	3.90946	3.69248
ASHGA5P026147	0.000228193	0.00594126	3.65919	down	protein_coding	ENST00000360213	CCDS31353.1	OR52M1	GENCODE	954	chr11	+	4566420	4567374		ACCAAGCAGATCCGAGAGAGCCTTCTCCAAATACCAAGGATAGAAATGAAGATTAGATGA	119772	Hs.553567	GO:0007186|GO:0016021|GO:0005886|GO:0004930|GO:0004984	olfactory receptor, family 52, subfamily M, member 1 [Source:HGNC Symbol;Acc:15225]	5.23887	30.7126	2.60107	4.4726	5	5.71661	5	30.8662	32.3288	28.9427	2.46913	2.83814	2.49594	4.40623	4.64904	4.36251
ASHGA5P006933	0.00143492	0.0144686	2.18047	down	protein_coding	NM_022839	CCDS10342.1	MRPS11	RefSeq	1501	chr15	+	89010683	89021861		CCAAGTTCAGCATTTACCCTCCCATTCCAGGAGAGGAGAGCTCTCTGAGGTGGGCAGGAA	64963	Hs.111286	GO:0003735|GO:0005763|GO:0005763|GO:0006412|GO:0042769	28S ribosomal protein S11, mitochondrial isoform a	1210.52	3016.34	10.2053	11.3299	1033.43	1580.11	1018.02	2930.33	2559.07	3559.6	10.118	10.2644	10.2333	11.2323	11.1579	11.5995
ASHGA5P028391	0.0275287	0.0841673	2.40314	down	protein_coding	NM_198827	CCDS9272.1	GPR133	RefSeq	5392	chr12	+	131438451	131626008		AAAGTCCCGGAGTGATACTGAGTTACCTCCAAAATGTATCCCTCAGCTTACCCAGTAAGT	283383	Hs.719239	GO:0004930|GO:0005886|GO:0007186|GO:0007218|GO:0016021	probable G-protein coupled receptor 133 precursor	11.3444	50.6785	3.97892	5.24385	14.6653	8.06695	11.301	51.1212	47.9132	53.0011	4.46063	3.24823	4.22791	5.17658	5.26011	5.29485
ASHGA5P040360	2.19528e-05	0.00248377	2.95061	down	protein_coding	NM_006727	CCDS3892.1	CDH10	RefSeq	3440	chr5	-	24487208	24645085		AACCTCTTGACCGTGAACTATCTCAGTGGCATAATCTTACTGTTATTGCTGCTGAAATCA	1008	Hs.92489	GO:0005509|GO:0005886|GO:0007156|GO:0016021|GO:0016337|GO:0034329|GO:0034332|GO:0045216	cadherin-10 preproprotein	5	22.9574	2.45604	4.01705	5	5	5	23.1697	23.3523	22.3502	2.46913	2.40305	2.49594	3.94762	4.14217	3.96137
ASHGA5P004151	0.014742	0.0557644	2.25602	down	protein_coding	NM_018361	CCDS34796.1	AGPAT5	RefSeq	5535	chr8	+	6565877	6619021		GAGAATTACACCGGGGTCCAGATATTGCTATATGGAGATTTGCCAAAAAATAAAGAAAAT	55326	Hs.624002	GO:0003841|GO:0005739|GO:0005741|GO:0005789|GO:0006644|GO:0006654|GO:0008654|GO:0016021|GO:0016024|GO:0019432|GO:0044255|GO:0044281|GO:0046474	1-acyl-sn-glycerol-3-phosphate acyltransferase epsilon	1440.56	3541.7	10.3997	11.5735	1738.85	1746.04	836.807	3508.17	3937.95	3178.96	10.8531	10.4061	9.93998	11.5078	11.7882	11.4246
ASHGA5P004187	0.00440249	0.0265458	2.26481	down	protein_coding	ENST00000286758	CCDS3582.1	CXCL13	GENCODE	1203	chr4	+	78432906	78532988		TATTGAGAAAAAGAAGTTCTTCAACTCTACCAGTTCCAGTGTTTAAGAGAAAGATTCCCT	10563	Hs.100431	GO:0043066|GO:0042742|GO:0006955|GO:0007165|GO:0007267|GO:0007204|GO:0045765|GO:0002467|GO:0048535|GO:0010820|GO:0035754|GO:0033634|GO:0032861|GO:0002920|GO:0002518|GO:0002544|GO:0033625|GO:0035768|GO:2000545|GO:0035769|GO:0005576|GO:0005615|GO:0005625|GO:0046982|GO:0008009|GO:0008201|GO:0017134|GO:0048018|GO:0031735|GO:0031724|GO:0048248	chemokine (C-X-C motif) ligand 13 [Source:HGNC Symbol;Acc:10639]	5.26138	19.9514	2.60574	3.78513	5	5.78413	5	17.1288	20.598	22.1274	2.46913	2.85216	2.49594	3.46172	3.947	3.94667
ASHGA5P011181	0.0386739	0.105777	2.65609	down	protein_coding	NM_001122769	CCDS4990.1	LCA5	RefSeq	4574	chr6	-	80194707	80247147	NM_181714	TCCATGTCGTAAAACAGGAGGTTGAAAAGCTGGAGGATGAATGGGAAAGAGAAGAACTTG	167691	Hs.21945	GO:0005515|GO:0005932|GO:0015031|GO:0035085	Lebercilin	123.815	417.595	7.00641	8.41572	174.65	140.215	56.5801	431.441	505.146	316.197	7.71375	6.94622	6.35927	8.423	8.8438	7.98035
ASHGA5P046356	0.00145812	0.0145866	2.16966	down	protein_coding	NM_004114	CCDS14665.1	FGF13	RefSeq	2705	chrX	-	137713733	137793827		ACAAAAACAAGTTAAATGTCTTTTCCCGGGTCAAACTCTTCGGCTCCAAGAAGAGGCGCA	2258	Hs.6540	GO:0000165|GO:0001764|GO:0005515|GO:0005634|GO:0005730|GO:0005737|GO:0005874|GO:0005886|GO:0007026|GO:0007165|GO:0007267|GO:0007399|GO:0007612|GO:0007613|GO:0008017|GO:0008083|GO:0014704|GO:0017080|GO:0021766|GO:0021795|GO:0030175|GO:0030295|GO:0030424|GO:0030425|GO:0030426|GO:0043005|GO:0044325|GO:0045200|GO:0045860|GO:0046785|GO:0048487|GO:0048671|GO:0072659	fibroblast growth factor 13 isoform 1	5.05692	18.6257	2.57023	3.68771	5	5.17075	5	17.5757	19.8782	18.423	2.46913	2.74563	2.49594	3.50172	3.89202	3.66938
ASHGA5P011130	0.0034645	0.0234696	3.21037	down	protein_coding	NM_002506	CCDS882.1	NGF	RefSeq	1052	chr1	-	115828536	115880857		CCACACTGAGGTGCATAGCGTAATGTCCATGTTGTTCTACACTCTGATCACAGCTTTTCT	4803	Hs.2561	GO:0000186|GO:0005057|GO:0005163|GO:0005576|GO:0005615|GO:0005768|GO:0005788|GO:0005796|GO:0006915|GO:0006954|GO:0007169|GO:0007202|GO:0007264|GO:0007265|GO:0007422|GO:0007613|GO:0008083|GO:0008284|GO:0008344|GO:0008624|GO:0009314|GO:0009612|GO:0010628|GO:0019233|GO:0031175|GO:0031954|GO:0032455|GO:0032496|GO:0035094|GO:0042493|GO:0043434|GO:0043524|GO:0045773|GO:0045786|GO:0046928|GO:0048011|GO:…	beta-nerve growth factor precursor	5	25.3796	2.45604	4.13878	5	5	5	29.1487	29.3019	17.6882	2.46913	2.40305	2.49594	4.31459	4.49395	3.6078
ASHGA5P044192	0.00398122	0.0251154	2.01483	down	protein_coding	NM_001100916	CCDS47835.1	MBOAT4	RefSeq	1663	chr8	-	29989186	30002200		GGGCTGCATTTCCCTTTGCACTTCTCTTCAATTATCTCTGCATCATGGATTCATTCTCCA	619373	Hs.627194	GO:0005789|GO:0016412|GO:0018191|GO:0030176	ghrelin O-acyltransferase	97.9333	282.149	6.8406	7.85126	106.132	104.93	82.7373	312.572	273.888	259.988	7.07775	6.57846	6.8656	7.93842	7.94111	7.67425
ASHGA5P037147	0.000425798	0.00787979	3.4592	down	protein_coding	ENST00000217133	CCDS13475.1	TUBB1	GENCODE	3496	chr20	+	57594308	57601709		TGGACAGCATTCGATCTAGCAAATTAGGAGCTCTCTTTCAACCCGACAGTTTTGTCCATG	81027	Hs.303023	GO:0006457|GO:0007018|GO:0051258|GO:0044267|GO:0006184|GO:0051225|GO:0051084|GO:0007017|GO:0005737|GO:0005874|GO:0043234|GO:0005525|GO:0003924|GO:0005200	tubulin, beta 1 class VI [Source:HGNC Symbol;Acc:16257]	5	26.7963	2.45604	4.24648	5	5	5	22.827	26.6253	30.9365	2.46913	2.40305	2.49594	3.92502	4.34754	4.46688
ASHGA5P009438	0.00393398	0.0249177	2.06373	down	protein_coding	NM_021249	CCDS9648.1	SNX6	RefSeq	3080	chr14	-	35030617	35099315	NM_152233	AACTGAAGCATGCAAAGGGTAATCTACAGTTGCTGCAGAACTGCCTGGCAGTGTTAAATG	58533	Hs.356647	GO:0005515|GO:0005622|GO:0005634|GO:0005737|GO:0006886|GO:0006886|GO:0007154|GO:0007175|GO:0030512|GO:0030659|GO:0031901|GO:0035091|GO:0042147|GO:0042803|GO:0043231|GO:0045892	sorting nexin-6 isoform a	11555.9	27067.9	13.4793	14.5245	10508.2	13672	10487.4	30580.1	30203.1	20420.6	13.3631	13.5165	13.5581	14.671	14.7063	14.1962
ASHGA5P050689	0.0142088	0.0545141	2.22671	down	protein_coding	ENST00000457476	CCDS46436.1	TANK	GENCODE	671	chr2	+	161993465	162061490		ACTACCAAAGGTAGACATTGCTTCTGCAGAAAGCAGCATTTAAATGCTGATGCGTGACAT	10010	Hs.132257	GO:0045087|GO:0007165|GO:0007249|GO:0005829|GO:0005515|GO:0046872|GO:0031625	TRAF family member-associated NFKB activator [Source:HGNC Symbol;Acc:11562]	1468.66	3796.95	10.5096	11.6645	1648	1373.01	1384.98	3560.36	4576.2	3254.28	10.7835	10.0731	10.6721	11.539	11.9994	11.4551
ASHGA5P038601	0.00921169	0.0414718	3.00729	down	protein_coding	NM_139248	CCDS3272.1	LIPH	RefSeq	2478	chr3	-	185225569	185270369		AAGACAGATTAGATCCCAGTGATGCGCAGTTTGTTGATGTCATCCATTCCGACACTGATG	200879	Hs.68864	GO:0004620|GO:0005615|GO:0005886|GO:0008201|GO:0016042	lipase member H precursor	5.60358	28.7563	2.78189	4.37036	6.81075	5	5	28.6362	28.5192	29.1135	3.44668	2.40305	2.49594	4.28555	4.45303	4.3725
ASHGA5P005951	2.14954e-05	0.00247083	2.44249	down	protein_coding	NM_005109	CCDS2675.1	OXSR1	RefSeq	4525	chr3	+	38207025	38296979		TTTCAAACTGGCATCTGGTGTCGAAGGCTCAGATATTCCTGATGATGGTAAACTGATAGG	9943	Hs.475970	GO:0000287|GO:0004674|GO:0005524|GO:0005737|GO:0006468|GO:0006979|GO:0007243	serine/threonine-protein kinase OSR1	5	19.2685	2.45604	3.74439	5	5	5	20.2473	19.172	18.3862	2.46913	2.40305	2.49594	3.73212	3.83471	3.66635
ASHGA5P010985	0.0309814	0.0913256	2.29485	down	protein_coding	NM_181715	CCDS30875.1	CRTC2	RefSeq	2696	chr1	-	153920147	153931132		CTCCACCCGGTTACAGGCCCAAAAACTGCGACTGGCATACACAAGGAGCTCTCATTATGG	200186	Hs.406392	GO:0005634|GO:0005730|GO:0005737|GO:0006094|GO:0006351|GO:0008140|GO:0019048|GO:0032793|GO:0042593|GO:0051289	CREB-regulated transcription coactivator 2	15.4217	62.131	4.35227	5.55067	8.85342	17.77	19.6416	56.7086	67.4359	62.2486	3.79087	4.29243	4.97352	5.33221	5.78802	5.53179
ASHGA5P003626	0.00452716	0.0269057	2.35598	down	protein_coding	NM_138800	CCDS2015.1	TRIM43	RefSeq	1642	chr2	+	96257765	96265469	ENST00000454263	AGATATATTTCTGAGGAAAATGGACTCAGACTTCTCACATGCCTTCCAGAAGGAACTCAC	129868	Hs.232026	GO:0005622|GO:0008270	tripartite motif-containing protein 43	10.1855	46.3039	3.87047	5.1068	9.13581	10.0412	11.3794	47.6996	47.6154	43.5966	3.8271	3.5449	4.2394	5.06869	5.25023	5.00147
ASHGA5P020050	0.00172792	0.0157789	5.37729	down	protein_coding	NM_020768	CCDS34260.1	KCTD16	RefSeq	5183	chr5	+	143550436	143856944		ATGACAAGATCTGGTCAAGCTACACTGAATATGTCTTCTACCGTGAGCCTTCCAGATGGT	57528	Hs.661870	GO:0005886|GO:0008277|GO:0030054|GO:0042734|GO:0043235|GO:0045211|GO:0051260	BTB/POZ domain-containing protein KCTD16	6.38647	50.1185	2.79735	5.22423	5	9.15941	5	53.9275	50.7577	45.6703	2.46913	3.42698	2.49594	5.25709	5.3472	5.0684
ASHGA5P047861	0.00217479	0.0180878	2.51321	down	protein_coding	NM_001031694	CCDS30688.1	SCMH1	RefSeq	3358	chr1	-	41492870	41627104		TTCAAGAAATGCTGGTTTGCTACAGTGTTTTAGCTTGTGAGATTCTCTGGGACCTTCCCT	22955	Hs.571874	GO:0003677|GO:0003700|GO:0005634|GO:0006338|GO:0006351|GO:0007283|GO:0009653|GO:0009952|GO:0010369|GO:0016458|GO:0045892|GO:0045892	polycomb protein SCMH1 isoform a	7.6783	38.6104	3.50024	4.82977	7.13118	7.64513	8.2586	38.8419	37.3216	39.6677	3.50229	3.1772	3.82123	4.75696	4.87587	4.85648
ASHGA5P048091	0.000426705	0.00787979	5.09593	down	protein_coding	ENST00000344514	CCDS31513.1	OR5W2	GENCODE	933	chr11	-	55681125	55682058		TCCTATTCTCTAGATCAAGATAAAATGACCTCATTGTTTTACACCCTTGTGGTTCCCATG	390148	Hs.554526	GO:0007186|GO:0016021|GO:0005886|GO:0004930|GO:0004984	olfactory receptor, family 5, subfamily W, member 2 [Source:HGNC Symbol;Acc:15299]	5.01988	43.4575	2.66334	5.01268	5.05964	5	5	45.6434	42.5623	42.1667	3.09101	2.40305	2.49594	5.00466	5.08214	4.95125
ASHGA5P036535	3.66809e-05	0.0028109	3.04301	down	protein_coding	NM_001072	CCDS2507.1	UGT1A6	RefSeq	2495	chr2	+	234601511	234681951		GACCACATGACTTTTTCCCAACGAGTGGCCAACTTCCTTGTTAATTTGTTGGAGCCCTAT	54578		GO:0001972|GO:0005789|GO:0006805|GO:0006805|GO:0008152|GO:0015020|GO:0016021|GO:0019899|GO:0042803|GO:0043231|GO:0044281|GO:0046982	UDP-glucuronosyltransferase 1-6 isoform 1 precursor	9.71977	56.4329	3.79954	5.40504	9.28228	11.8111	8.06591	55.4236	58.2439	55.6311	3.84575	3.76218	3.7907	5.29805	5.55282	5.36426
ASHGA5P028536	3.12201e-05	0.00269605	4.60155	down	protein_coding	NM_000621	CCDS9405.1	HTR2A	RefSeq	5442	chr13	-	47405676	47471211		AAAGCTGCAGAATGCCACCAACTATTTCCTGATGTCACTTGCCATAGCTGATATGCTGCT	3356	Hs.72630	GO:0001659|GO:0004435|GO:0004993|GO:0005737|GO:0005886|GO:0005886|GO:0005887|GO:0006661|GO:0006950|GO:0007208|GO:0007210|GO:0007268|GO:0007568|GO:0007613|GO:0008144|GO:0008219|GO:0008284|GO:0014059|GO:0014065|GO:0019233|GO:0030431|GO:0042493|GO:0043198|GO:0043267|GO:0043406|GO:0045907|GO:0051209|GO:0051209|GO:0051378|GO:0051967|GO:0070371|GO:0071886	5-hydroxytryptamine receptor 2A isoform 1	9.35598	81.0126	3.75912	5.96124	9.05285	10.7636	8.25144	82.9284	83.8675	76.2418	3.817	3.64002	3.82033	5.91591	6.1297	5.8381
ASHGA5P019638	0.0189572	0.0657356	4.45529	down	protein_coding	NM_001145553		FLJ25363	RefSeq	1493	chr3	+	109128836	109214014		CGAGGATAATGCTTGGCACAAGGTGTTTATAATTCCCTTGGTTTTCTTCACAATTTCACC	401082	Hs.477089		uncharacterized protein LOC401082	9.07974	61.7762	3.38731	5.54283	14.1267	8.11255	5	60.3911	65.8174	59.12	4.4097	3.25628	2.49594	5.42387	5.74944	5.45518
ASHGA5P001144	6.01513e-05	0.00328498	2.45026	down	protein_coding	ENST00000221742	CCDS12321.1	SLC1A6	GENCODE	1719	chr19	-	15060990	15083730		TGCTACAAGCCCTCATCACCGCTATGGGCACGTCTTCCAGCTCGGCAACGCTGCCCATCA	6511	Hs.515217	GO:0055085|GO:0006811|GO:0007268|GO:0042391|GO:0015813|GO:0006835|GO:0015810|GO:0005886|GO:0016020|GO:0005624|GO:0005887|GO:0017153|GO:0015183|GO:0005313	solute carrier family 1 (high affinity aspartate/glutamate transporter), member 6 [Source:HGNC Symbol;Acc:10944]	16.9823	73.6537	4.51687	5.8098	15.8483	22.4937	12.6049	79.1062	65.8797	75.9752	4.56575	4.60034	4.3845	5.84498	5.75122	5.8332
ASHGA5P007146	0.000466861	0.00830643	2.87397	down	protein_coding	ENST00000328698	CCDS31631.1	DEFB108B	GENCODE	222	chr11	+	71544245	71548608		TTTTCTTCTTTATGAGCCAAGTTCTACCAGCCAGGGGCAAATTCAAGGAGATCTGTGAAC	245911	Hs.555032	GO:0042742|GO:0005576	defensin, beta 108B [Source:HGNC Symbol;Acc:29966]	5	22.5068	2.45604	3.97909	5	5	5	19.9348	23.9736	23.612	2.46913	2.40305	2.49594	3.70642	4.1875	4.04333
ASHGA5P052294	0.000845547	0.0110723	2.00773	down	protein_coding	NM_032380	CCDS4023.1	GFM2	RefSeq	3111	chr5	-	74017030	74063042	NM_170691	AATTCATCCTGGCACCTCCACAACTATGATTTCTGCCTGTGTCTCAAGATGCGTGCAAAA	84340	Hs.277154	GO:0003746|GO:0003924|GO:0005525|GO:0005739|GO:0006184|GO:0032543|GO:0032790|GO:0070125	ribosome-releasing factor 2, mitochondrial isoform 1	5248.24	11901.2	12.3317	13.3373	4789.95	6193.34	4761.41	12837.7	12790.6	10075.2	12.2804	12.2964	12.4184	13.4228	13.4567	13.1323
ASHGA5P050922	0.0197976	0.0676708	2.6448	down	protein_coding	NM_013281	CCDS13121.1	FLRT3	RefSeq	3830	chr20	-	14304638	14318313	NM_198391	TTCTGAAGTAACGGAAGCTACCTTGTATAAAGACCTCAACACTGCTGACCATGATCAGCG	23767	Hs.41296	GO:0005057|GO:0005578|GO:0005887|GO:0007155|GO:0008150|GO:0030674	leucine-rich repeat transmembrane protein FLRT3 precursor	5.23865	25.1921	2.7435	4.14666	5	5	5.71595	21.9304	30.4919	23.1541	2.46913	2.40305	3.35831	3.86324	4.55903	4.01771
ASHGA5P016423	0.00668876	0.0339704	2.64479	down	protein_coding	NM_001122633	CCDS46505.1	CPS1	RefSeq	5738	chr2	+	211342405	211543831		GAGGCCCATGCCACAAATCATCAAAATGACGAGGATTTTGACAGCTTTCAAAGTGGTGAG	1373	Hs.149252	GO:0000050|GO:0000050|GO:0004087|GO:0004175|GO:0005509|GO:0005515|GO:0005524|GO:0005543|GO:0005730|GO:0005743|GO:0005759|GO:0005980|GO:0006543|GO:0007494|GO:0009636|GO:0010043|GO:0016595|GO:0019240|GO:0019433|GO:0032094|GO:0032403|GO:0032496|GO:0034641|GO:0042493|GO:0042594|GO:0042645|GO:0043200|GO:0043234|GO:0044281|GO:0044344|GO:0045909|GO:0046209|GO:0050667|GO:0055081|GO:0060416|GO:0070365|GO:…	carbamoyl-phosphate synthase [ammonia], mitochondrial isoform a precursor	5.21564	24.3456	2.70495	4.10811	5.64691	5	5	23.007	24.6731	25.3567	3.21586	2.40305	2.49594	3.93621	4.23374	4.15437
ASHGA5P001879	9.67525e-05	0.00409965	2.15206	down	protein_coding	NM_017703	CCDS12218.1	FBXL12	RefSeq	1876	chr19	-	9920942	9929731		AGATCTTCTCTTACCTCCCGGTACGGGACCGGATCCGCATCTCCAGGGTCTGTCACCGCT	54850	Hs.12439	GO:0000151|GO:0005515|GO:0005737|GO:0006511	F-box/LRR-repeat protein 12	33.886	119.635	5.43673	6.54245	30.2987	44.3154	27.0439	116.039	114.257	128.61	5.42073	5.48817	5.40131	6.41226	6.59581	6.61929
ASHGA5P000953	0.0393684	0.107027	2.35979	down	protein_coding	NM_006939	CCDS9697.1	SOS2	RefSeq	5313	chr14	-	50583845	50698099		TTTAGATGTGGATCTCAACAGCTCCTGTGGCAGCAATAGCATCTTTGCTCCAGTGCTTTT	6655	Hs.291533	GO:0003677|GO:0005085|GO:0005089|GO:0005515|GO:0005543|GO:0005829|GO:0006915|GO:0007264|GO:0007264|GO:0007411|GO:0008624|GO:0035023|GO:0046982|GO:0048011|GO:0051056	son of sevenless homolog 2	318.959	932.174	8.31201	9.55067	221.591	470.887	264.397	1305.52	953.184	537.821	8.0218	8.54993	8.3643	10.0629	9.78233	8.80681
ASHGA5P036725	2.72904e-05	0.00266853	3.24229	down	protein_coding	ENST00000400549	CCDS42860.1	DEFB116	GENCODE	309	chr20	-	29891014	29896388		TCATGAAGCCCTGTTTAATGACCATTGCCATCCTTATGATCCTGGCTCAAAAGACTCCAG	245930	Hs.580703	GO:0042742|GO:0005576	defensin, beta 116 [Source:HGNC Symbol;Acc:18097]	16.4328	94.0856	4.49095	6.18796	16.19	20.1351	12.9733	92.037	91.6318	98.588	4.5949	4.4564	4.42154	6.0736	6.26358	6.2267
ASHGA5P053813	0.000746121	0.0103957	2.14973	down	protein_coding	NM_001031725	CCDS30964.1	DDX59	RefSeq	2337	chr1	-	200613164	200639126		CATACCTTCATGACCAGAAGAGAAAGGAACAACAGAAAGATAAACAGACACAGAATGATC	83479	Hs.497332	GO:0003723|GO:0005524|GO:0005622|GO:0008026|GO:0046872	probable ATP-dependent RNA helicase DDX59	3579.96	8734.36	11.7736	12.8777	3536.5	4101.8	3101.59	9017.3	9729.08	7456.69	11.8342	11.6828	11.8037	12.8766	13.0679	12.6887
ASHGA5P048102	0.00039098	0.00760493	3.34742	down	protein_coding	ENST00000312240	CCDS31532.1	OR5M3	GENCODE	1051	chr11	-	56236963	56238014		AATTTTTATTCTTGCTGCGATGGCCTTTGATAGATACATGGCAATTGGGAATCCTCTGCT	219482	Hs.553631	GO:0007186|GO:0016021|GO:0005886|GO:0004930|GO:0004984	olfactory receptor, family 5, subfamily M, member 3 [Source:HGNC Symbol;Acc:14806]	5	25.9594	2.45604	4.19909	5	5	5	28.9211	27.6608	21.2964	2.46913	2.40305	2.49594	4.30162	4.40363	3.89202
ASHGA5P045310	0.0135654	0.0529312	4.36916	down	protein_coding	NM_001100111		LOC286238	RefSeq	682	chr9	-	91262093	91267075		AGCGTGTATATGCTCCTTATACATCTGTCCTAATGCTTTCCAACAGTCCTCACTCTAAGC	286238	Hs.434185		uncharacterized protein LOC286238	14.1018	101.785	4.1729	6.30026	23.6113	8.76537	9.92864	99.4872	97.0756	108.791	5.0927	3.36504	4.06097	6.18738	6.3441	6.3693
ASHGA5P010807	0.000896201	0.0114071	2.37934	down	protein_coding	NM_145034	CCDS1334.1	TOR1AIP2	RefSeq	7912	chr1	-	179809101	179846941	NM_001199260	AATAAAAAGGGTTTTTGGAGCTATGGCCCTGTGATTCTTGTCGTCCTGGTTGTGGCTGTT	163590	Hs.571797	GO:0005789|GO:0016021|GO:0031965	torsin-1A-interacting protein 2 isoform b	47.0299	176.339	5.88668	7.13725	48.7535	50.2904	42.0458	198.927	162.486	167.603	6.04643	5.64145	5.97216	7.24678	7.14797	7.01699
ASHGA5P007351	0.0067799	0.0342853	2.24361	down	protein_coding	NM_005569	CCDS13891.1	LIMK2	RefSeq	3701	chr22	+	31608249	31676066		CTTGCTTCCGGTGTTCAGAATGCCAGGATTCCCTCACCAACTGGTACTATGAGAAGGATG	3985	Hs.474596	GO:0004674|GO:0005524|GO:0005634|GO:0005737|GO:0005801|GO:0007283|GO:0008270|GO:0016310|GO:0046982	LIM domain kinase 2 isoform 2a	37.5011	137.805	5.59728	6.7631	39.3469	34.5888	38.5676	145.597	135.83	131.989	5.76466	5.16351	5.86366	6.76988	6.86261	6.65682
ASHGA5P048065	0.000937587	0.0116377	2.90394	down	protein_coding	NM_002334	CCDS31478.1	LRP4	RefSeq	8244	chr11	-	46878267	46940173		TTGGTGGACTCCTCAGTATTCTGCTGATTTTGGTGGTGATTGCAGCTTTGATGCTGTACA	4038	Hs.4930	GO:0001822|GO:0001932|GO:0001942|GO:0005509|GO:0005515|GO:0005575|GO:0005886|GO:0006897|GO:0009953|GO:0009954|GO:0016021|GO:0016055|GO:0030279|GO:0030971|GO:0042475|GO:0042733|GO:0042803|GO:0043113|GO:0051124|GO:0090090|GO:0090090	low-density lipoprotein receptor-related protein 4 precursor	10.2923	55.9195	3.85271	5.39072	7.372	13.0629	10.442	58.5039	55.7933	53.4613	3.54439	3.89338	4.12035	5.37856	5.48773	5.30587
ASHGA5P040720	0.0288301	0.0870016	2.05027	down	protein_coding	NM_139199	CCDS4198.1	BRD8	RefSeq	4074	chr5	-	137475458	137514358		ATTCTGAACAAGATCATCCCAATGACTCTGAGTTGAGCAATGACTGCAGGTCCCTCTTCA	10902	Hs.519337	GO:0003700|GO:0004887|GO:0005634|GO:0005634|GO:0005730|GO:0005739|GO:0006355|GO:0006357|GO:0007165|GO:0007166|GO:0035267|GO:0040008|GO:0043967|GO:0043968	bromodomain-containing protein 8 isoform 2	5	17.0749	2.45604	3.49186	5	5	5	20.3467	10.1165	20.7614	2.46913	2.40305	2.49594	3.74084	2.87776	3.85697
ASHGA5P054854	0.000889354	0.0113849	2.21698	down	protein_coding	NM_053023	CCDS31553.1	ZFP91	RefSeq	5735	chr11	+	58346586	58389023	NM_001197051	CATACTGCAGTGGGACGGAACGGGTGAGCCTGATGGCTGATGGGAAGATCTTTGTGGGAA	80829		GO:0003676|GO:0004842|GO:0005634|GO:0005730|GO:0007250|GO:0008270|GO:0043231|GO:0070534	E3 ubiquitin-protein ligase ZFP91 isoform 1	1236.95	3079.77	10.2208	11.3694	1051.33	1692.85	966.668	3350.88	3201.32	2687.11	10.1449	10.356	10.1614	11.446	11.51	11.1521
ASHGA5P038213	0.00212253	0.0178197	2.19176	down	protein_coding	NM_001205271	CCDS54576.1	PRSS46	RefSeq	984	chr3	-	46761072	46777921		TTCAAAGCCTTACATCTCCGCTTTCCTCTGCCAGATTAGATTATCAGCCGTCTATTGAAG	100287362	Hs.673244	GO:0004252|GO:0006508	putative serine protease 46	138.482	410.405	7.28736	8.41945	150.667	144.776	120.003	423.801	383.162	424.252	7.53435	6.98814	7.33957	8.3937	8.43232	8.43232
ASHGA5P031587	6.199e-06	0.00180355	3.7223	down	protein_coding	NM_015039	CCDS1353.1	NMNAT2	RefSeq	5579	chr1	-	183217371	183387634		TTATCTTGCTCGCCTGCGGCAGCTTCAATCCCATCACCAAAGGGCACATTCAGATGTTTG	23057	Hs.497123	GO:0000139|GO:0000309|GO:0004515|GO:0005524|GO:0005634|GO:0005737|GO:0005770|GO:0005794|GO:0005802|GO:0006766|GO:0006767|GO:0009435|GO:0009435|GO:0019674|GO:0044281	nicotinamide mononucleotide adenylyltransferase 2 isoform 1	5	28.5017	2.45604	4.35224	5	5	5	30.6571	24.8463	30.0018	2.46913	2.40305	2.49594	4.39503	4.24515	4.41653
ASHGA5P015155	0.00233144	0.0188188	2.04783	down	protein_coding	NM_001012412	CCDS46771.1	SGOL1	RefSeq	1599	chr3	-	20202084	20227698	NM_001012411, NM_001199253, NM_001199254	TTTGATTCAGCTACACCACCTGAAACTCAGCAGTCACCTCATCTTAGCCTGAAGGATATC	151648	Hs.105153	GO:0000087|GO:0000236|GO:0000278|GO:0000775|GO:0000776|GO:0000776|GO:0000777|GO:0000779|GO:0000780|GO:0000922|GO:0005515|GO:0005813|GO:0005829|GO:0007059|GO:0008608|GO:0010457|GO:0030892|GO:0045132|GO:0051301	shugoshin-like 1 isoform B2	988.376	2360.51	9.92434	10.9584	959.493	1132.82	872.812	2619.46	2454.68	2007.38	10.0065	9.7689	9.99763	11.0662	11.1066	10.7025
ASHGA5P007407	0.000411477	0.00779637	2.10326	down	protein_coding	NM_003560	CCDS13967.1	PLA2G6	RefSeq	3239	chr22	-	38507501	38577761		AACAACCTAGAACTACAGGATCTCATGCACATCTCACGGGCCCGGAAGCCAGCGTTCATC	8398	Hs.170479	GO:0004623|GO:0005737|GO:0005813|GO:0005829|GO:0006644|GO:0008219|GO:0016020|GO:0016042|GO:0032049|GO:0035965|GO:0036151|GO:0036152|GO:0044281|GO:0046474	85 kDa calcium-independent phospholipase A2 isoform a	5	16.8401	2.45604	3.52867	5	5	5	16.1513	15.4896	18.8794	2.46913	2.40305	2.49594	3.37967	3.50091	3.70542
ASHGA5P049650	0.00225939	0.0184945	2.72926	down	protein_coding	NM_033419	CCDS32641.1	PGAP3	RefSeq	2708	chr17	-	37827374	37844310		TCCTACCTGAGCCTCATCCGCTTCGACTATGGCTACAACCTGGTGGCCAACGTGGCTATT	93210	Hs.462971	GO:0000139|GO:0006505|GO:0006506|GO:0016021|GO:0016788|GO:0031227	post-GPI attachment to proteins factor 3 precursor	44.3137	190.715	5.80817	7.25668	50.936	43.9777	38.0275	207.131	192.876	172.139	6.09776	5.47768	5.84908	7.30877	7.40709	7.05418
ASHGA5P008835	0.0279211	0.0850422	2.17629	down	protein_coding	NM_201568	CCDS53444.1	SMG7	RefSeq	5798	chr1	+	183441505	183523328	NM_173156	GCCGTTTGAGAAATCCTTATTGGAGAAGCCCTCAGAGCTCATGTCACATTCATCCTCTTT	9887	Hs.591463	GO:0000184|GO:0005515|GO:0005634|GO:0005737|GO:0005829|GO:0006406|GO:0010467|GO:0016070|GO:0016071|GO:0035303|GO:0045111|GO:0051721	protein SMG7 isoform 2	21.62	74.3327	4.7015	5.82337	17.871	36.3456	10.6434	67.6795	74.7116	80.6069	4.7288	5.22929	4.1464	5.59962	5.95149	5.91899
ASHGA5P008113	0.00113023	0.0127542	2.0008	down	protein_coding	NM_001184794	CCDS53513.1	PARD3	RefSeq	3391	chr10	-	34601187	35104253	ENST00000340077, NM_001184793	ACATGTTCAGCCTTGCCAAACTGAAGCCCGAGAAGAGATGAACAACAAAGCGATTCAAAA	56288	Hs.131489	GO:0000226|GO:0003383|GO:0005080|GO:0005515|GO:0005546|GO:0005547|GO:0005819|GO:0005829|GO:0005886|GO:0005911|GO:0005911|GO:0005913|GO:0005923|GO:0005923|GO:0005938|GO:0006461|GO:0006612|GO:0007049|GO:0007163|GO:0007179|GO:0007205|GO:0007409|GO:0008356|GO:0012505|GO:0030054|GO:0032266|GO:0032970|GO:0034329|GO:0043234|GO:0044319|GO:0045177|GO:0045216|GO:0051642|GO:0070830|GO:0070830|GO:0090162	partitioning defective 3 homolog isoform 11	4218.33	9576.52	12.0233	13.0239	4265.37	4565.41	3824.2	9137.83	10495.1	9096.66	12.1036	11.853	12.1133	12.8985	13.1847	12.9884
ASHGA5P054535	0.00728592	0.0357919	3.45895	down	protein_coding	NM_173497	CCDS7415.1	HECTD2	RefSeq	1726	chr10	+	93170095	93222967		ACTTAATACTGTAAGTATTATGACATGCAAGTAATATTATTCTGTGTCTCTTCTGTATAT	143279	Hs.596096	GO:0004842|GO:0005634|GO:0005737|GO:0042787	probable E3 ubiquitin-protein ligase HECTD2 isoform b	7.09108	41.5934	3.14357	4.9339	7.55828	8.71495	5	45.8864	43.5316	35.3623	3.5763	3.35847	2.49594	5.01122	5.11378	4.67671
ASHGA5P042818	0.00111396	0.0126733	2.43559	down	protein_coding	NM_001035230	CCDS41437.1	RABGAP1L	RefSeq	815	chr1	+	174844655	174927327	NM_001243763	AAGATGATGGAAGAAATCTCCATTATGGTAGCCTATGACGCCCATGTTTTCAGCCAGCTG	9910	Hs.585378	GO:0005097|GO:0005634|GO:0005769|GO:0005794|GO:0017137|GO:0032851|GO:0032880	rab GTPase-activating protein 1-like isoform B	13.5947	61.5597	4.25062	5.5349	12.5585	16.1327	12.0929	59.1166	69.2436	56.3188	4.25331	4.17082	4.32774	5.39438	5.82797	5.38234
ASHGA5P025172	0.00108059	0.0124476	5.48518	down	protein_coding	NM_001005513		OR4C45	RefSeq	921	chr11	-	48366899	48373999		ACCATATCCTTCAATGGCTGCATGACTCAGCTCTTCACAGAACATTTCTTTGAGGCAGCT	403257	Hs.554533	GO:0004930|GO:0004984|GO:0005886|GO:0016021	olfactory receptor 4C45	5.27301	48.4818	2.71806	5.17359	5.81904	5	5	44.5723	50.4239	50.4493	3.25517	2.40305	2.49594	4.96763	5.33777	5.21539
ASHGA5P039976	0.00660338	0.0336872	2.143	down	protein_coding	ENST00000340595	CCDS3549.1	SLC4A4	GENCODE	7640	chr4	+	72204769	72437804		AGCTCCACTTTCCTCAGGGTTGTCCAGCCAATGTTTAACCACAGTATTTTCACTTCTGCA	8671	Hs.5462	GO:0055085|GO:0006811|GO:0006810|GO:0015701|GO:0006820|GO:0016021|GO:0005886|GO:0016020|GO:0016323|GO:0005887|GO:0005515|GO:0005215|GO:0005452|GO:0008509|GO:0008510	solute carrier family 4, sodium bicarbonate cotransporter, member 4 [Source:HGNC Symbol;Acc:11030]	63.7541	203.375	6.25403	7.35366	75.3249	70.819	45.1183	223.013	204.601	182.509	6.62033	6.08185	6.05989	7.41669	7.49941	7.14487
ASHGA5P002381	0.0102623	0.0443836	2.70012	down	protein_coding	ENST00000258243	CCDS31052.1	URB2	GENCODE	5613	chr1	+	229761980	229795946		GGATCCCGAGATAAAGCCTAGCCATGGCTGCTGTTTATTCTGGCATTTCCCTTAAGCTTA	9816	Hs.533628	GO:0005634|GO:0005730	URB2 ribosome biogenesis 2 homolog (S. cerevisiae) [Source:HGNC Symbol;Acc:28967]	10.3989	52.1184	3.85302	5.28605	6.43077	11.6761	13.0899	51.7487	49.6979	54.9086	3.37635	3.74744	4.43528	5.19613	5.31512	5.34688
ASHGA5P026791	0.00341024	0.0233101	2.11648	down	protein_coding	NM_001161772	CCDS53710.1	HTR3A	RefSeq	2019	chr11	+	113848221	113861034		TGCTCTTCCAAGCCAGATCTCTGCTTTCCTGTCAATGAATGCATAGGTCCTTTCTACAAG	3359	Hs.413899	GO:0004872|GO:0004993|GO:0004993|GO:0005230|GO:0005232|GO:0005249|GO:0005737|GO:0005886|GO:0005887|GO:0006810|GO:0007210|GO:0007210|GO:0007268|GO:0007586|GO:0016021|GO:0030054|GO:0030424|GO:0034220|GO:0042220|GO:0043025|GO:0045211|GO:0051378|GO:0055085|GO:0071363	5-hydroxytryptamine receptor 3A isoform c	33.0428	117.444	5.43365	6.51532	35.5853	32.9858	30.5573	118.762	115.469	118.101	5.62907	5.10175	5.57014	6.44637	6.61148	6.48812
ASHGA5P012117	1.88298e-06	0.00127712	3.34227	down	protein_coding	NM_138272	CCDS4715.1	C6orf25	RefSeq	2416	chr6	+	31691120	31694485		CCTAGATTTGCTCCACTTGTGAAAACCGAGCCCCAGAGGCCAGTAAAGGAGGAAGAGCCC	80739	Hs.247879	GO:0005783|GO:0005794|GO:0005886|GO:0008201|GO:0016021	protein G6b isoform G6b-B precursor	5	25.782	2.45604	4.19687	5	5	5	27.9852	24.1997	25.1612	2.46913	2.40305	2.49594	4.24698	4.20236	4.14126
ASHGA5P003584	0.000129712	0.00465688	2.03005	down	protein_coding	NM_001040033	CCDS829.1	CD53	RefSeq	1572	chr1	+	111413820	111442558	NM_000560	TCAAGGAAAACAAGTGTCTGCTTATGTCGTTCTTCATCCTGCTGCTGATTATCCTCCTTG	963	Hs.443057	GO:0001772|GO:0005515|GO:0005886|GO:0007165|GO:0009986|GO:0016021	leukocyte surface antigen CD53	54.3863	171.215	6.06761	7.08912	52.5403	62.9928	47.6257	183.831	155.147	174.666	6.1399	5.93101	6.13192	7.12091	7.06924	7.07721
ASHGA5P055540	0.00134033	0.0139857	2.80504	down	protein_coding	ENST00000409445	CCDS9008.2	CAPS2	GENCODE	2135	chr12	-	75669758	75723836		TGTCCTGTCCAGGAATCCCAGTTAGGTAGGGGATGGGGAATTCCTTCTGCTACACTGCAG	84698	Hs.733835	GO:0005509	calcyphosine 2 [Source:HGNC Symbol;Acc:16471]	7.14125	40.2249	3.40372	4.89175	5.85897	7.91	7.65478	40.1077	42.5245	38.0424	3.2627	3.22399	3.72448	4.80412	5.08106	4.79005
ASHGA5P002779	0.000925065	0.0116012	2.06896	down	protein_coding	NM_003835	CCDS42373.1	RGS9	RefSeq	2540	chr17	+	63133455	63223821	NM_001081955	TTGAAATCCAAGAGAGTAGCAAACTTTTTCCAGATCAAAATGGATGTGCCCACGGGGAGC	8787	Hs.664380	GO:0004871|GO:0005096|GO:0005634|GO:0005737|GO:0005834|GO:0005886|GO:0007212|GO:0007399|GO:0007601|GO:0008277|GO:0032403|GO:0035556|GO:0038032|GO:0043627	regulator of G-protein signaling 9 isoform 1	6.44478	28.0174	3.28048	4.32939	6.75153	6.86323	5.7196	29.34	26.5198	28.1924	3.43616	3.04626	3.35903	4.32511	4.34158	4.32149
ASHGA5P021890	0.000271895	0.00643369	2.06552	down	protein_coding	ENST00000543727	CCDS53810.1	TSFM	GENCODE	930	chr12	+	58176527	58196639		TTAGCAATTGGTCTGCCTTTCCAAATTGGAGCTGTCTCTGAACTTCAGCTTCCTGAATCC	10102	Hs.632704	GO:0006414|GO:0005622|GO:0005515|GO:0003746	Ts translation elongation factor, mitochondrial [Source:HGNC Symbol;Acc:12367]	29.1484	102.167	5.26093	6.30744	28.2306	33.5	25.7146	108.493	100.254	97.7539	5.32973	5.12087	5.33221	6.31329	6.3933	6.21573
ASHGA5P017577	0.0204878	0.0690739	2.30472	down	protein_coding	NM_001167961	CCDS55117.1	KCTD7	RefSeq	3886	chr7	+	66093867	66108216		TCACATGGTGAAATTGAAAAAGATCCCCAAGGATCTGTTACTACTGCATTTCCTTCTTGC	154881	Hs.546627	GO:0051260	BTB/POZ domain-containing protein KCTD7 isoform 2	5.6886	26.5597	3.04114	4.24573	6.01058	5	6.05522	27.1826	26.1988	26.2977	3.29173	2.40305	3.42864	4.19969	4.32398	4.21353
ASHGA5P000793	0.0168482	0.0607031	3.07762	down	protein_coding	NM_017754	CCDS43455.1	UHRF1BP1	RefSeq	9658	chr6	+	34759793	34845291		AAGATGGCGTTTGACTATTACCCTTTCCATTGGGCAGGTGATAGCTGCAAACATTGGGTA	54887	Hs.700656	GO:0005515|GO:0042802|GO:0042826	UHRF1-binding protein 1	6.97969	31.3095	2.87543	4.49724	5	10.9391	5	34.0084	32.7349	27.1853	2.46913	3.66122	2.49594	4.55679	4.66835	4.26659
ASHGA5P048988	0.0180072	0.0635844	2.31533	down	protein_coding	NM_144570	CCDS10441.1	HN1L	RefSeq	3705	chr16	+	1728277	1752073		GTCCTGAACCCACCGGGAGGCAAATCCAGCATCTCCTTCTACTAAGAGAAGCCACTGCTC	90861	Hs.513261	GO:0005634|GO:0005737|GO:0005886	hematological and neurological expressed 1-like protein	65.6283	217.881	6.19905	7.41027	48.7721	106.645	41.4675	202.87	155.757	295.017	6.04721	6.596	5.95396	7.27897	7.07502	7.87683
ASHGA5P054379	0.000827458	0.0109455	2.59454	down	protein_coding	ENST00000276393	CCDS6054.1	ADRA1A	GENCODE	2281	chr8	-	26627221	26722922		ACAAGAACCATCAAGTTCCAACCATTAAGGTCCACACCATCTCCCTCAGTGAGAACGGGG	148	Hs.709175	GO:0006915|GO:0008285|GO:0007186|GO:0007165|GO:0042493|GO:0006950|GO:0007568|GO:0070374|GO:0007267|GO:0045907|GO:0009725|GO:0007204|GO:0006939|GO:0007243|GO:0032229|GO:0035024|GO:0007202|GO:0060402|GO:0090037|GO:0045760|GO:0060452|GO:0016021|GO:0005886|GO:0005887|GO:0004937	adrenoceptor alpha 1A [Source:HGNC Symbol;Acc:277]	1115.24	3296.47	10.0884	11.4639	908.154	1470.14	967.433	3276.91	2755.3	3857.2	9.91962	10.1832	10.1625	11.4114	11.2762	11.7042
ASHGA5P013250	0.000169904	0.00525252	3.2193	down	protein_coding	ENST00000392043	CCDS44283.1	ABL2	GENCODE	2140	chr1	-	179079715	179198819		ATTTCTGAAGTTCTCCTACATTGTGCCAATCAGACGTGCATAACATTGTGAACCAAAAGA	27	Hs.159472	GO:0007411|GO:0006464|GO:0018108|GO:0007155|GO:0007165|GO:0030155|GO:0006468|GO:0030100|GO:0010976|GO:0010506|GO:2000249|GO:0071300|GO:0051353|GO:2000145|GO:0005829|GO:0015629|GO:0005515|GO:0005524|GO:0000287|GO:0004672|GO:0004713|GO:0051015|GO:0016772|GO:0030145|GO:0004715|GO:0003785	v-abl Abelson murine leukemia viral oncogene homolog 2 [Source:HGNC Symbol;Acc:77]	5	25.027	2.45604	4.14279	5	5	5	29.8271	23.3797	21.8742	2.46913	2.40305	2.49594	4.35164	4.14437	3.93235
ASHGA5P002579	0.0019757	0.0170916	2.14635	down	protein_coding	NM_014254	CCDS8966.1	TMEM5	RefSeq	1451	chr12	+	64173636	64202887		TACAAATCTGGGGCAAAGCTGCCATTGGCTTGTATCTCTGGGAGCATATTTTTGAAGGCT	10329	Hs.216386	GO:0005887	transmembrane protein 5	465.173	1177.18	8.84997	9.95186	364.799	635.099	395.622	1403.25	1119.64	1008.64	8.69417	8.9421	8.91364	10.1553	9.99467	9.70562
ASHGA5P009682	0.0218441	0.0721238	2.03743	down	protein_coding	NM_198903	CCDS47333.1	GABRG2	RefSeq	4077	chr5	+	161494647	161582545	NM_198904	TTCCTTCAAGGCCCCTACCATTGATATCCGCCCAAGATCAGCAACCATTCAAATGAATAA	2566	Hs.7195	GO:0004890|GO:0005230|GO:0005254|GO:0005515|GO:0005886|GO:0005887|GO:0006810|GO:0007214|GO:0007268|GO:0008503|GO:0030054|GO:0032590|GO:0034220|GO:0034707|GO:0045211|GO:0051932|GO:0055085	gamma-aminobutyric acid receptor subunit gamma-2 isoform 3 precursor	61.2332	192.806	6.2339	7.26065	63.5656	56.772	63.3621	222.508	199.674	156.236	6.39299	5.79961	6.50908	7.4137	7.45889	6.90936
ASHGA5P007644	0.00997947	0.0435891	3.79282	down	protein_coding	ENST00000335304	CCDS3251.1	HTR3E	GENCODE	1912	chr3	+	183817966	183824783	NM_001256613	CTCTTGTCATCATTCCTGTGGCTGGAAATGGTTTGGGATAACCCATTTATCAGCTGGAAC	285242	Hs.449179	GO:0055085|GO:0006811|GO:0006810|GO:0034220|GO:0016021|GO:0005886|GO:0016020|GO:0045211|GO:0004872|GO:0005230	5-hydroxytryptamine (serotonin) receptor 3E, ionotropic [Source:HGNC Symbol;Acc:24005]	8.04267	49.7704	3.2894	5.21267	9.69756	9.43046	5	53.3406	46.3373	49.6332	3.9098	3.46247	2.49594	5.23996	5.20942	5.18865
ASHGA5P047430	2.31546e-05	0.00251764	2.60838	down	protein_coding	NM_001080512	CCDS31206.1	BICC1	RefSeq	3119	chr10	+	60272903	60588845		TGAAGGAGCTGGGAATAACTACTTTTGGTGCCAGGAGGAAAATGCTGCTTGCAATTTCAG	80114	Hs.158745	GO:0003723|GO:0007275|GO:0090090	protein bicaudal C homolog 1	5	20.5455	2.45604	3.8392	5	5	5	21.2402	18.2968	22.0993	2.46913	2.40305	2.49594	3.80978	3.76218	3.94564
ASHGA5P051240	0.000612287	0.00948197	2.0193	down	protein_coding	NM_199127	CCDS13802.2	GGTLC2	RefSeq	855	chr22	+	22988781	22990368		CATGCCCCAGGCCATCATCTACAACCTCTGGTTCGGCTATGACGTGAAGCGGGCCGTGGA	91227	Hs.632765	GO:0003840|GO:0006749|GO:0019370|GO:0031362	gamma-glutamyltransferase light chain 2 isoform 1	29.5272	99.6863	5.24858	6.26244	24.1591	39.5795	24.8429	99.1575	86.7795	113.122	5.12446	5.33933	5.28195	6.18353	6.17865	6.42513
ASHGA5P011647	0.0199115	0.0679174	2.81636	down	protein_coding	NM_001130438	CCDS48036.1	SPTAN1	RefSeq	7907	chr9	+	131314836	131395944		TCCAAGCTGCTGAGCAAGCACCAGAAGCACCAGGCTTTTGAAGCAGAGCTGCATGCCAAC	6709	Hs.372331	GO:0003779|GO:0005200|GO:0005509|GO:0005515|GO:0005516|GO:0005829|GO:0005916|GO:0006915|GO:0006921|GO:0007411|GO:0008091|GO:0015630|GO:0016020|GO:0016328|GO:0030018|GO:0030507|GO:0032437|GO:0043231|GO:0046982|GO:0051693	spectrin alpha chain, brain isoform 1	6.01205	27.1027	2.73588	4.22971	5	8.03615	5	31.8093	31.6198	17.8791	2.46913	3.24258	2.49594	4.44958	4.61632	3.62325
ASHGA5P020921	0.000359329	0.00729118	5.50621	down	protein_coding	NM_014989	CCDS47449.1	RIMS1	RefSeq	7836	chr6	+	72596405	73112845		ATATTTACAGCTCAATTCTGCCTGCACATACTAAGACCAAATCAGTGACTAGACAGGACA	22999	Hs.485729	GO:0005083|GO:0005515|GO:0005622|GO:0005886|GO:0006461|GO:0006886|GO:0006944|GO:0007268|GO:0007269|GO:0007601|GO:0014047|GO:0016079|GO:0017137|GO:0017156|GO:0030054|GO:0042734|GO:0042734|GO:0045055|GO:0046872|GO:0046903|GO:0048169|GO:0050896	regulating synaptic membrane exocytosis protein 1 isoform 1	5.70343	47.5265	2.68406	5.14512	5	7.11028	5	51.7671	47.964	42.8484	2.46913	3.08711	2.49594	5.19737	5.26136	4.97663
ASHGA5P006610	5.39337e-06	0.00180355	3.91651	down	protein_coding	ENST00000321063	CCDS43646.1	PLXNA4	GENCODE	13061	chr7	-	131808090	132261323		TTCAACATTGACAACCCAGCTCAGAATAAAGTTCACCTCTACAAGTGTGGAGCCATGCGT	91584	Hs.511454	GO:0007275|GO:0007411|GO:0007165|GO:0021615|GO:0021960|GO:0048485|GO:0071526|GO:0021636|GO:0021644|GO:0021784|GO:0048841|GO:0021610|GO:0021793|GO:0050923|GO:0016021|GO:0005886|GO:0005622|GO:0016020|GO:0002116|GO:0004872|GO:0005515	plexin A4 [Source:HGNC Symbol;Acc:9102]	5	29.8805	2.45604	4.42561	5	5	5	32.1457	26.1052	31.3906	2.46913	2.40305	2.49594	4.46513	4.31861	4.4931
ASHGA5P006193	0.00731205	0.0358714	2.5985	down	protein_coding	ENST00000315286	CCDS45704.1	CCDC43	GENCODE	2138	chr17	-	42754804	42767165		ATGTGACAGATGAAGAGGATGAAGCAGATGAGAAGGATGATTCAGGTGCTACCACAATGA	124808	Hs.579115		coiled-coil domain containing 43 [Source:HGNC Symbol;Acc:26472]	280.487	840.737	8.1071	9.48478	266.946	425.197	149.317	935.655	861.254	725.301	8.27698	8.41354	7.63078	9.58272	9.64235	9.22927
ASHGA5P001198	0.00479501	0.0279074	2.12786	down	protein_coding	NM_001206747	CCDS5766.1	CAV2	RefSeq	3121	chr7	+	116139654	116148595		GCATCTCAAGCTGGGCTTCGAGGATGTGATCGCAGAGCCGGTGACTACGCACTCCTTTGA	858	Hs.212332	GO:0000139|GO:0001937|GO:0002080|GO:0005515|GO:0005622|GO:0005634|GO:0005794|GO:0005811|GO:0005829|GO:0005886|GO:0005887|GO:0005901|GO:0006906|GO:0007005|GO:0007029|GO:0007088|GO:0007268|GO:0009986|GO:0016020|GO:0016050|GO:0019905|GO:0030133|GO:0031234|GO:0031748|GO:0042803|GO:0043234|GO:0045121|GO:0048278|GO:0048471|GO:0048741|GO:0051219|GO:0051259|GO:0060161|GO:0070836	caveolin-2 isoform b	3117.01	7277.21	11.5244	12.6138	2326.07	4487.17	2537.81	8566.17	6699.63	6565.82	11.2517	11.8207	11.5008	12.8097	12.5458	12.4859
ASHGA5P004945	9.83622e-05	0.00411127	2.05484	down	protein_coding	NM_001914	CCDS12005.1	CYB5A	RefSeq	874	chr18	-	71920526	71959251	NM_148923	CAAAACATTCATCATTGGGGAGCTCCATCCAGATGACAGACCAAAGTTAAACAAGCCTCC	1528	Hs.465413	GO:0004033|GO:0004129|GO:0005741|GO:0005789|GO:0006766|GO:0006767|GO:0016021|GO:0019852|GO:0019899|GO:0020037|GO:0022900|GO:0044281|GO:0046872	cytochrome b5 isoform 2	2649.84	6103.04	11.3294	12.3684	2720.8	3026.26	2202.46	6331.49	5870.04	6107.61	11.4492	11.2212	11.3177	12.3602	12.3602	12.3848
ASHGA5P037254	0.0225509	0.0735817	2.03814	down	protein_coding	ENST00000382835	CCDS33532.1	KRTAP27-1	GENCODE	682	chr21	-	31709330	31710012		TACTGGTGGTTCTCAATTGCCTAGTAAGTGAAGATCTGTAGGGGAGATGGCTTATATTCT	643812	Hs.580881	GO:0005882	keratin associated protein 27-1 [Source:HGNC Symbol;Acc:33864]	5.06261	19.1416	2.70357	3.73082	5	5	5.18782	18.2529	19.8475	19.3245	2.46913	2.40305	3.23854	3.56083	3.88983	3.74182
ASHGA5P052198	0.0451848	0.117446	2.24526	down	protein_coding	NM_138348	CCDS43302.1	FAM105B	RefSeq	7896	chr5	+	14664782	14699842		AATGACCCAGGACAGCTTCTGAGGAACCACCTCAACCAGGTGGGACACACTGGTGGTCTT	90268	Hs.406335		protein FAM105B	50.6256	173.428	5.8476	7.01448	32.7577	84.9027	34.2163	163.227	106.417	250.641	5.52139	6.30763	5.71377	6.94329	6.48262	7.61752
ASHGA5P001387	0.000670647	0.00983221	3.11894	down	protein_coding	NM_001145286	CCDS47507.1	OPRM1	RefSeq	1589	chr6	+	154360442	154428787	ENST00000330432, NM_001008503, NM_001008504, NM_001008505, NM_001145279, NM_001145280, NM_001145281, NM_001145282, NM_001145283, NM_001145284, NM_001145285, NM_001145287	TACAGGCAAGGTTCCATAGATTGTACACTAACATTCTCTCATCCAACCTGGTACTGGGAA	4988	Hs.2353	GO:0001965|GO:0004930|GO:0004979|GO:0005245|GO:0005515|GO:0005783|GO:0005794|GO:0005886|GO:0005887|GO:0007187|GO:0007191|GO:0007193|GO:0007194|GO:0007200|GO:0007204|GO:0007600|GO:0007610|GO:0007626|GO:0008285|GO:0019233|GO:0033554|GO:0038047|GO:0043950|GO:0043951|GO:0045019|GO:0045429|GO:0048149|GO:0050769|GO:0050795|GO:0051481|GO:0061358|GO:0070374|GO:0071315|GO:2000310	mu-type opioid receptor isoform MOR-1B5	10.2411	58.5672	3.81817	5.45923	9.79951	14.522	6.40196	63.8041	56.9986	54.8989	3.92258	4.03197	3.49998	5.51122	5.52025	5.34622
ASHGA5P048565	0.000189194	0.0054152	3.09599	down	protein_coding	NM_001033028	CCDS45189.1	CYFIP1	RefSeq	3351	chr15	+	22955754	23003603		AACCTTTGGTGGTAAGACATCATTTGTTTCTCTTGACGTTTATGGCACGGAGGCGAACTG	23191	Hs.26704	GO:0001726|GO:0005515|GO:0005845|GO:0008360|GO:0030027|GO:0030032|GO:0030054|GO:0031529|GO:0043005|GO:0045202|GO:0048365|GO:0048471|GO:0048675|GO:0051015	cytoplasmic FMR1-interacting protein 1 isoform b	5.06752	25.8512	2.57181	4.20221	5	5.20256	5	24.9744	26.8598	25.7194	2.46913	2.75036	2.49594	4.06914	4.35965	4.17784
ASHGA5P003788	0.00975545	0.0429742	2.22818	down	protein_coding	NM_013437	CCDS6303.1	LRP12	RefSeq	4149	chr8	-	105501458	105601252		TCCTCGCTGGGGTGTACGGAAATGGTGCTCTTGCAGAACATTCTGAAAATGTGCATATTT	29967	Hs.600630	GO:0005041|GO:0005515|GO:0005887|GO:0005905|GO:0006897|GO:0007165|GO:0016021|GO:0040008	low-density lipoprotein receptor-related protein 12 isoform a precursor	5.5493	23.062	2.86996	4.02583	6.03789	5.61	5	22.7906	24.2285	22.1669	3.29652	2.81742	2.49594	3.92287	4.2044	3.95022
ASHGA5P049773	0.00354363	0.023701	2.41628	down	protein_coding	NM_003579	CCDS532.1	RAD54L	RefSeq	3164	chr1	+	46713366	46744145	NM_001142548	GCCTGCTTTTGACCTTTGGCTCATGGGTACTTGACGTTTTAAACTCCTAGGCCCAGGATG	8438	Hs.642042	GO:0000724|GO:0000733|GO:0003677|GO:0004386|GO:0005515|GO:0005524|GO:0005634|GO:0006281|GO:0006310|GO:0007126|GO:0010212|GO:0036310|GO:0042493|GO:0051276	DNA repair and recombination protein RAD54-like	21.0554	85.1337	4.75289	6.02568	13.8301	31.5505	17.7857	91.3945	72.3273	91.6794	4.37943	5.04457	4.83469	6.06159	5.89881	6.11665
ASHGA5P047845	0.00186046	0.0165111	2.20664	down	protein_coding	NM_001005238	CCDS31365.1	OR51G2	RefSeq	945	chr11	-	4935948	4936893		GTATCTTCTCTTTCCTCCTGTGATGAATCCCATTGTCTACAGTGTGAAGACCAAACAGAT	81282	Hs.542302	GO:0004930|GO:0004984|GO:0005886|GO:0016021	olfactory receptor 51G2	120.032	367.924	7.1025	8.24435	122.955	130.08	107.062	429.384	325.95	348.439	7.26849	6.84898	7.19003	8.41432	8.20105	8.11767
ASHGA5P053047	0.0108376	0.0459306	3.56631	down	protein_coding	NM_001077480	CCDS41430.1	NR1I3	RefSeq	1399	chr1	-	161199455	161208000	ENST00000367980, NM_001077473, NM_001077478	TCTCCCACAGTGGGGTTCCAGGTAGAGTTTTTGGAGTTGCTCTTTCACTTCCATGGAACA	9970	Hs.349642	GO:0003677|GO:0003700|GO:0003713|GO:0004879|GO:0004882|GO:0004887|GO:0005634|GO:0005654|GO:0005737|GO:0005856|GO:0006367|GO:0007165|GO:0008270|GO:0010467|GO:0030521|GO:0030522|GO:0043565	nuclear receptor subfamily 1 group I member 3 isoform 2	12.5643	79.9734	4.10654	5.94097	11.7234	8.86134	17.1083	86.1783	77.2683	76.4734	4.1575	3.38134	4.78078	5.97815	6.00208	5.84269
ASHGA5P002694	0.00367478	0.0241772	2.79438	down	protein_coding	ENST00000261908	CCDS10247.1	NEO1	GENCODE	7088	chr15	+	73344824	73597547	NM_001172623	AAGCTGTCCAATTCAGAACACCTAAAGCGGACTCCTCTGATAAAATGCCTAATGATCAAG	4756	Hs.388613	GO:0007411|GO:0007155|GO:0055072|GO:0042692|GO:0051149|GO:0016021|GO:0005886|GO:0005887|GO:0005515	neogenin 1 [Source:HGNC Symbol;Acc:7754]	5	22.1864	2.45604	3.93857	5	5	5	23.7032	26.308	16.5479	2.46913	2.40305	2.49594	3.98719	4.33103	3.4975
ASHGA5P003114	0.00445627	0.0267033	2.65718	down	protein_coding	ENST00000264731	CCDS3293.1	TP63	GENCODE	4909	chr3	+	189349215	189615068	NM_001114980	TTGCAGCATTGTCAGTTTCTTAGCGAGGTTGGGCTGTTCATCATGTCTGGACTATTTCAC	8626	Hs.137569	GO:0006915|GO:0000122|GO:0045893|GO:0042475|GO:0001501|GO:0006917|GO:0045892|GO:0006355|GO:0045944|GO:0006338|GO:0010259|GO:0001736|GO:0051262|GO:0007219|GO:0048745|GO:0045747|GO:0030216|GO:0043616|GO:0006916|GO:0051289|GO:0009954|GO:0010165|GO:0043523|GO:0048485|GO:0002053|GO:0031069|GO:0051402|GO:0002064|GO:0007569|GO:0030326|GO:0010332|GO:0048807|GO:0034644|GO:0042771|GO:0043589|GO:0060529|GO:…	tumor protein p63 [Source:HGNC Symbol;Acc:15979]	10.4134	50.9502	3.84049	5.25039	6.36463	14.0524	10.8231	54.6081	46.8524	51.3902	3.36454	3.98857	4.16836	5.27724	5.22617	5.24776
ASHGA5P018009	0.00505748	0.028746	2.13132	down	protein_coding	NM_014760	CCDS33698.1	TATDN2	RefSeq	4909	chr3	+	10290176	10322906		TAAGCAGAGAAGGTACAGTCCTCGGGAGTCTCCTAGAAAAGGGCGACCAGCAGCCTGACA	9797	Hs.475401	GO:0005654|GO:0006987|GO:0016888|GO:0030968|GO:0046872	putative deoxyribonuclease TATDN2	880.928	2193.37	9.76162	10.8534	910.639	926.098	806.048	2109.27	2468.06	2002.79	9.92491	9.4748	9.88514	10.7435	11.1173	10.6993
ASHGA5P041939	0.0480199	0.122516	2.41161	down	protein_coding	NM_002043	CCDS5020.2	GABRR2	RefSeq	1631	chr6	-	89967238	90024967		TTTGTTCTTGTTTTGCTTGATGGTTCTCGTGGAGAGCAGAAAACCCAAGAGGAAGCGATG	2570	Hs.719891	GO:0004890|GO:0005230|GO:0005254|GO:0005886|GO:0005887|GO:0006810|GO:0007165|GO:0007214|GO:0007268|GO:0007601|GO:0019904|GO:0030054|GO:0034220|GO:0034707|GO:0045211|GO:0055085	gamma-aminobutyric acid receptor subunit rho-2 precursor	11.0053	44.99	3.74211	5.0121	5.90426	20.9649	6.14662	46.0854	31.4239	57.4608	3.27086	4.50814	3.44731	5.01724	4.60674	5.41233
ASHGA5P004443	0.00194908	0.0169564	5.56258	down	protein_coding	NM_052939	CCDS1167.1	FCRL3	RefSeq	3019	chr1	-	157647977	157670647		ACTTCAAAACCCCTAAATATCCAAGTTCAAGAGCTGTTTCTACATCCTGTGCTGAGAGCC	115352	Hs.292449	GO:0005886|GO:0016021	Fc receptor-like protein 3 precursor	5.877	61.9884	3.07325	5.549	7.08316	5	5.54783	64.2072	61.7719	59.9861	3.4943	2.40305	3.32238	5.51956	5.65085	5.4766
ASHGA5P027294	1.10618e-05	0.00216313	3.22881	down	protein_coding	NM_001242696		LOC283403	RefSeq	1292	chr12	-	52599364	52604639		TCAAGAATTCATGCCATGGATTGGGCCAATGTTCCACCTTTATTGGAGTCTGGGGACTTA	283403	Hs.667179		uncharacterized protein LOC283403	5	25.08	2.45604	4.14704	5	5	5	27.8503	21.982	25.4078	2.46913	2.40305	2.49594	4.23834	4.04514	4.15765
ASHGA5P007708	0.0330365	0.0952963	3.16314	down	protein_coding	NM_023110	CCDS6107.2	FGFR1	RefSeq	5917	chr8	-	38268655	38326352	ENST00000425967, NM_001174063, NM_001174064, NM_001174065, NM_001174066, NM_015850, NM_023105, NM_023106	AGAAAGAAACAGATAACACCAAACCAAACCGTATGCCCGTAGCTCCATATTGGACATCCC	2260	Hs.264887	GO:0000122|GO:0000165|GO:0001501|GO:0001525|GO:0001657|GO:0001701|GO:0001759|GO:0001764|GO:0001948|GO:0002053|GO:0002062|GO:0004713|GO:0005007|GO:0005007|GO:0005515|GO:0005524|GO:0005576|GO:0005634|GO:0005829|GO:0005886|GO:0005886|GO:0005887|GO:0006351|GO:0006468|GO:0007411|GO:0007605|GO:0008201|GO:0008284|GO:0008284|GO:0008284|GO:0008286|GO:0008543|GO:0008543|GO:0008543|GO:0008543|GO:0010518|GO:…	fibroblast growth factor receptor 1 isoform 1 precursor	728.656	2426.72	9.33	10.9914	1035.06	860.423	290.481	2432.28	2967.89	1879.99	10.1222	9.36824	8.49954	10.9693	11.391	10.6137
ASHGA5P052789	0.00506768	0.0287737	2.19281	down	protein_coding	NM_006372	CCDS5005.1	SYNCRIP	RefSeq	3194	chr6	-	86323692	86353043	NM_001159675	AGGCCGCGGGGTACGTGGTGCGAGGGGTGGCCGCGGTGGAAATGTAGGAGGAAAGCGCAA	10492	Hs.571177	GO:0000166|GO:0000398|GO:0003723|GO:0005515|GO:0005634|GO:0005654|GO:0005783|GO:0006396|GO:0008143|GO:0008380|GO:0019048|GO:0030529|GO:0070934|GO:0070937|GO:0071013|GO:0071204	heterogeneous nuclear ribonucleoprotein Q isoform 1	887.203	2183.16	9.71114	10.8439	713.3	1301.04	647.269	2214.54	1696.47	2638.46	9.58505	9.98106	9.56731	10.8226	10.5925	11.1167
ASHGA5P022039	0.000219388	0.0058243	2.24106	down	protein_coding	NM_174942	CCDS9079.1	GAS2L3	RefSeq	2341	chr12	+	100967488	101018685		ACTACCCCATTGCTGTCTTTATGAAAAGAAATTTCATTTCAATATAGGTGACTATGCAGC	283431	Hs.20575	GO:0007050	GAS2-like protein 3	19.4204	76.8642	4.71549	5.87967	16.5123	23.5697	18.1793	79.9866	76.1017	74.5042	4.6214	4.66189	4.86318	5.85877	5.97953	5.80071
ASHGA5P003871	0.0275085	0.0841652	3.024	down	protein_coding	ENST00000339123	CCDS13076.1	SMOX	GENCODE	2074	chr20	+	4129425	4168394	ENST00000278795	AGATTGAGCCCCGGGGTGTGCTAAAGAGGCAGTACACCAGTTTCTTCCGGCCAGGCCTGC	54498	Hs.433337	GO:0055114|GO:0044281|GO:0034641|GO:0006596|GO:0006805|GO:0006595|GO:0046208|GO:0005634|GO:0005737|GO:0005829|GO:0016491|GO:0046592|GO:0052901|GO:0052894|GO:0052895	spermine oxidase [Source:HGNC Symbol;Acc:15862]	9.33576	44.072	3.43486	5.03132	9.32291	13.6844	5	46.3613	42.1933	43.6615	3.85134	3.95729	2.49594	5.0246	5.06619	5.00315
ASHGA5P032401	0.0163001	0.0593805	3.24053	down	protein_coding	NM_033032	CCDS54122.1	KRTAP2-2	RefSeq	714	chr17	-	39210750	39211463		CAGTCTAACTCCTATATCATGTTGTCTGCTTTCTAATAAACTCAATACTCCTACCATAGA	728279	Hs.650131	GO:0045095	putative keratin-associated protein ENSP00000381495	12.333	68.1175	3.99173	5.68796	18.6555	12.7646	5.57887	73.6714	61.9123	68.7689	4.78309	3.8642	3.3279	5.72559	5.65408	5.68419
ASHGA5P004296	1.89115e-06	0.00127712	2.48783	down	protein_coding	NM_178562	CCDS5810.1	TSPAN33	RefSeq	2900	chr7	+	128784711	128809534		AAATACCTGCTCTTCTTCTTCAACATGCTCTTCTGGGTGATTTCCATGGTGATGGTGGCT	340348	Hs.27267	GO:0016021	tetraspanin-33	63.7243	235.095	6.26011	7.575	58.7195	79.9393	52.514	250.464	220.044	234.776	6.28458	6.23622	6.25952	7.59194	7.61254	7.52051
ASHGA5P013507	0.0332039	0.0956429	3.39531	down	protein_coding	NM_001164617	CCDS55496.1	GPC3	RefSeq	2398	chrX	-	132669775	133119673		GACCACCACTGAAACTGAGAAGAAAATATGGCACTTCAAATATCCTATCTTCTTCCTGTG	2719	Hs.644108	GO:0005515|GO:0005578|GO:0005615|GO:0005796|GO:0005886|GO:0005887|GO:0005975|GO:0006024|GO:0006027|GO:0009653|GO:0030203|GO:0030204|GO:0031225|GO:0043202|GO:0043395|GO:0044281|GO:0060422|GO:0072138	glypican-3 isoform 1 precursor	8.53703	37.8895	3.03025	4.79379	5	15.6111	5	42.1262	36.8583	34.684	2.46913	4.12567	2.49594	4.87754	4.85797	4.64586
ASHGA5P002585	0.0125195	0.0501846	2.08578	down	protein_coding	ENST00000261296	CCDS9471.1	TGDS	GENCODE	1902	chr13	-	95226307	95248511		ACAGGAAATGTTGCATTCATGGGTCAGGGCTTCAAACAAGAAACTTCCTTTATGCTACTG	23483	Hs.12393	GO:0055114|GO:0006694|GO:0044237|GO:0009058|GO:0045226|GO:0009225|GO:0000166|GO:0003824|GO:0050662|GO:0003854|GO:0016616|GO:0008831|GO:0008460	TDP-glucose 4,6-dehydratase [Source:HGNC Symbol;Acc:20324]	492.382	1129.86	8.84097	9.90156	332.876	814.518	329.753	1337.77	967.241	1084.56	8.56189	9.29124	8.66979	10.0894	9.80457	9.81072
ASHGA5P009274	0.000508697	0.00868249	2.09066	down	protein_coding	NM_182676	CCDS13387.1	PLTP	RefSeq	1944	chr20	-	44527258	44541003		AGACAGCTGCTCTACTGGTTCTTGAAGGTGTATGATTTTCTCTCCACGTTCATCACCTCA	5360	Hs.439312	GO:0005576|GO:0006629|GO:0006869|GO:0008289|GO:0010189|GO:0030317	phospholipid transfer protein isoform b precursor	35.951	124.324	5.53223	6.59619	32.7746	43.7963	31.2822	116.926	115.302	140.743	5.52225	5.47377	5.60066	6.42215	6.60944	6.75697
ASHGA5P043545	4.5221e-05	0.0029626	2.60274	down	protein_coding	NM_001163941	CCDS55090.1	ABCB5	RefSeq	5401	chr7	+	20655244	20796637		TCAAAACATGTCTACTTTTTCGATTGGCCTGGCAGTTGGTTTGGTGAAGGGCTGGAAACT	340273	Hs.404102	GO:0000139|GO:0005524|GO:0005886|GO:0005887|GO:0015562|GO:0016324|GO:0042391|GO:0042626|GO:0046581|GO:0055085|GO:0055085	ATP-binding cassette sub-family B member 5 isoform 1	10.1526	50.6981	3.86405	5.24408	10.2736	11.6665	8.51773	52.3157	48.7292	51.0494	3.986	3.74582	3.86034	5.21101	5.28466	5.23658
ASHGA5P018019	0.000728042	0.0102629	3.64486	down	protein_coding	NM_001145399	CCDS44560.1	MPPED2	RefSeq	5693	chr11	-	30406039	30607930		ATCCATGAAGTAAACCCTGTGAGCATCTCCAAGGCACTGAGGACAAAAATATGTTCTCTG	744	Hs.289795	GO:0007399|GO:0016787|GO:0046872	metallophosphoesterase MPPED2 isoform 2	5	28.1687	2.45604	4.32191	5	5	5	28.521	33.047	22.9382	2.46913	2.40305	2.49594	4.27827	4.68388	4.00357
ASHGA5P021575	0.000225958	0.00589728	2.74336	down	protein_coding	ENST00000535378	CCDS54970.1	KIAA0319	GENCODE	6896	chr6	-	24544331	24646383		TTTAAGAAGACCCATGACTAGACTGGGCTGGCCGAGCCCATGTTGTGCCCGTAAGCAGTG	9856	Hs.26441	GO:0001764|GO:2000171|GO:0016021|GO:0005886|GO:0005769|GO:0031901|GO:0005515	KIAA0319 [Source:HGNC Symbol;Acc:21580]	5	21.6635	2.45604	3.91198	5	5	5	22.4392	17.895	24.6564	2.46913	2.40305	2.49594	3.89723	3.72599	4.11273
ASHGA5P032593	0.0199252	0.0679369	2.61869	down	protein_coding	NM_022559	CCDS45760.1	GH1	RefSeq	777	chr17	-	61994562	61996198	NM_000515	CTCTGTTTCTCAGAGTCTATTCCGACACCCTCCAACAGGGAGGAAACACAACAGAAATCC	2688	Hs.655229	GO:0002092|GO:0005131|GO:0005131|GO:0005148|GO:0005179|GO:0005515|GO:0005576|GO:0005615|GO:0007259|GO:0008083|GO:0010535|GO:0014068|GO:0015758|GO:0032355|GO:0040018|GO:0040018|GO:0042517|GO:0042523|GO:0043406|GO:0043568|GO:0046427|GO:0046872|GO:0050731|GO:0060396|GO:0060397|GO:0070977	somatotropin isoform 2 precursor	5.05771	24.1874	2.67213	4.06097	5.17314	5	5	18.9455	31.7526	21.8642	3.11739	2.40305	2.49594	3.62788	4.62348	3.93156
ASHGA5P011706	0.0185247	0.0647662	2.05996	down	protein_coding	ENST00000373063	CCDS4856.1	FOXP4	GENCODE	5910	chr6	+	41514163	41570122		TTCAGCCAGCCAGTGACCGTCTCTGCAGCAGACTCATTCCCAGATGGTCTCGTGCACCCC	116113	Hs.131436	GO:0000122|GO:0007507|GO:0006355|GO:0007389|GO:0051090|GO:0009888|GO:0048617|GO:0005667|GO:0005737|GO:0003700|GO:0008270|GO:0046982|GO:0003690|GO:0043565|GO:0042803|GO:0003682|GO:0008134|GO:0003705|GO:0008301	forkhead box P4 [Source:HGNC Symbol;Acc:20842]	16.8729	61.9082	4.49536	5.53798	10.865	20.0103	19.7435	68.273	54.0048	63.4467	4.05921	4.44687	4.98001	5.61294	5.43979	5.5612
ASHGA5P011829	0.000127097	0.00461691	2.36176	down	protein_coding	ENST00000403528	CCDS344.1	HCRTR1	GENCODE	2001	chr1	+	32083300	32092919		GCTGCCAACCCCATCATCTACAACTTCCTCAGTGGCAAATTCCGGGAGCAGTTTAAGGCT	3061	Hs.388226	GO:0007186|GO:0007218|GO:0007268|GO:0007631|GO:0016021|GO:0005886|GO:0005887|GO:0004930|GO:0016499|GO:0017046	hypocretin (orexin) receptor 1 [Source:HGNC Symbol;Acc:4848]	108.8	356.924	6.9725	8.21236	107.966	127.321	91.1119	363.557	336.718	370.497	7.10183	6.82309	6.99257	8.16693	8.25184	8.21829
ASHGA5P004381	0.0187179	0.0652092	2.22753	down	protein_coding	NM_014188	CCDS32.1	SSU72	RefSeq	1319	chr1	-	1477052	1510262		TGAGCTCTGCCAGTGTATCCAGCACACGGAAGACATGGAGAACGAGATCGACGAGCTGCT	29101	Hs.549751	GO:0004721|GO:0005634|GO:0005737|GO:0006397	RNA polymerase II subunit A C-terminal domain phosphatase SSU72	2426.43	6042.23	11.1565	12.312	2037.42	3599.4	1642.47	5754.93	4349.83	8021.94	11.0732	11.4679	10.9285	12.211	11.9285	12.7965
ASHGA5P013274	0.000845923	0.0110723	3.94514	down	protein_coding	ENST00000392299	CCDS47497.1	GRM1	GENCODE	6939	chr6	+	146348781	146758731		TTGAAAACCCCCACACTGCAGTGAATGTTTCTAATGGCAAGTCTGTGTCATGGTCTGAAC	2911	Hs.32945	GO:0007186|GO:0019722|GO:0000187|GO:0007626|GO:0007268|GO:0051966|GO:0019233|GO:0043408|GO:0000186|GO:0051930|GO:0071257|GO:0016021|GO:0005634|GO:0005886|GO:0030424|GO:0005792|GO:0005887|GO:0014069|GO:0042734|GO:0004930|GO:0030331|GO:0008066	glutamate receptor, metabotropic 1 [Source:HGNC Symbol;Acc:4593]	5.3368	33.5132	2.6212	4.60127	5	6.0104	5	28.4966	36.7987	35.2442	2.46913	2.89852	2.49594	4.27664	4.85578	4.67139
ASHGA5P046435	0.012316	0.0496326	2.56167	down	protein_coding	NM_001178119	CCDS53500.1	ABI1	RefSeq	3641	chr10	-	27035524	27150016	NM_001012750, NM_001012752, NM_001178122, NM_005470	TGCCTCAGTTGACTCCACAGATACCTCTCACAGGCTTCGTGGCCAGGGTGCAGGAAAACA	10006	Hs.508148	GO:0001756|GO:0005515|GO:0005622|GO:0005634|GO:0005783|GO:0005829|GO:0005856|GO:0006928|GO:0007169|GO:0008092|GO:0008154|GO:0008285|GO:0018108|GO:0030027|GO:0030054|GO:0030175|GO:0030296|GO:0030426|GO:0045202	abl interactor 1 isoform f	407.05	1205.3	8.62029	9.97738	234.74	587.643	398.768	1516.91	1119.51	979.492	8.09915	8.83924	8.92248	10.2666	9.99421	9.67134
ASHGA5P013513	0.000968782	0.011821	2.67678	down	protein_coding	NM_024577	CCDS4293.1	SH3TC2	RefSeq	26588	chr5	-	148361712	148442737		GGAACATAGATCCTGATTCTTATTCCCCAATGAGCAGGAACTCTGCCTTTCTCAGTGATG	79628	Hs.483784	GO:0005886|GO:0032287|GO:0055037	SH3 domain and tetratricopeptide repeat-containing protein 2	11.4174	57.7173	4.01326	5.43376	13.1316	11.9136	9.20703	64.3311	52.1398	56.6811	4.30905	3.77157	3.95916	5.52239	5.38749	5.39139
ASHGA5P012860	0.00485738	0.0280813	2.03848	down	protein_coding	NM_152622	CCDS3973.2	MIER3	RefSeq	5220	chr5	-	56215428	56247954		AAACATTCTCAACTCCTTCACTGCCAGTGACTTGACAGCTTTGACCAACAGTGTAGCAAC	166968	Hs.657594	GO:0003677|GO:0003682|GO:0005634|GO:0006351|GO:0006355	mesoderm induction early response protein 3	37.5661	126.14	5.59644	6.62393	33.4731	40.4885	38.7368	139.409	126.984	112.026	5.55026	5.37026	5.8688	6.70241	6.76112	6.40826
ASHGA5P008989	0.00407132	0.0254575	2.0988	down	protein_coding	NM_173574	CCDS279.2	ZNF683	RefSeq	1665	chr1	-	26688124	26699266	NM_001114759	CAAGTGCTCGGTGTGCCACAAGCGCTTCAGCAGCTCCAGTAACCTCAAGACCCACCTGCG	257101	Hs.353208	GO:0003677|GO:0005634|GO:0006351|GO:0006355|GO:0008270	zinc finger protein 683	17.0204	65.012	4.55106	5.62063	19.0861	16.9421	15.0331	69.0665	64.6866	61.2829	4.81199	4.23349	4.60769	5.63066	5.72373	5.50749
ASHGA5P038471	0.0014678	0.0145866	3.16843	down	protein_coding	NM_001184	CCDS3124.1	ATR	RefSeq	8258	chr3	-	142168076	142297668		TGTTGTCTTACAACTGACTGCTCTGTGTACTGTTCATTGTTCTCATCAAAACATGAACTG	545	Hs.271791	GO:0000075|GO:0000077|GO:0003677|GO:0004672|GO:0004674|GO:0005515|GO:0005524|GO:0005654|GO:0006260|GO:0006281|GO:0006974|GO:0007049|GO:0007275|GO:0008156|GO:0016605|GO:0018105|GO:0032405|GO:0032407|GO:0034644|GO:0043517|GO:0046777|GO:0071480|GO:0090399	serine/threonine-protein kinase ATR	15.5907	83.015	4.33545	5.99922	13.306	24.0224	9.44389	85.7655	83.8136	79.4659	4.32749	4.69042	3.98845	5.96911	6.12865	5.8999
ASHGA5P033910	9.57306e-05	0.00409965	2.53232	down	protein_coding	NM_001001964	CCDS31122.1	OR2T11	RefSeq	951	chr1	-	248789478	248790429		GCATTTAAAAAGGTATTTGCATGTTGCTCATCTGCTCAGAAAGTAGCAACAAGTGATGCT	127077	Hs.626619	GO:0004930|GO:0004984|GO:0005886|GO:0016021	olfactory receptor 2T11	5	19.96	2.45604	3.7965	5	5	5	19.2524	18.7512	21.8764	2.46913	2.40305	2.49594	3.65338	3.80346	3.93267
ASHGA5P034934	0.0134955	0.0527208	2.54677	down	protein_coding	NM_018263		ASXL2	RefSeq	7174	chr2	-	25962252	26101312		TACCACGAAGGACTAAGTAAAGCAACCCAAGATCAGATCCTTCAGACTCTCATTCAGAGG	55252	Hs.119815	GO:0005634|GO:0006351|GO:0035360|GO:0042975|GO:0045600|GO:0045944|GO:0046872	putative Polycomb group protein ASXL2	5	20.618	2.45604	3.80471	5	5	5	14.0768	23.9432	23.8341	2.46913	2.40305	2.49594	3.17193	4.1848	4.05741
ASHGA5P026772	0.00611027	0.032237	2.87804	down	protein_coding	NM_198498	CCDS31674.1	C11orf53	RefSeq	1106	chr11	+	111126706	111156972		TCTGACTCAGACTTCCACAACAGTAAACAGTTTTCAAATGACGTCTACACCTCCAGCGTG	341032	Hs.298685		uncharacterized protein C11orf53	5.02739	26.2722	2.69608	4.22117	5	5	5.08217	28.4615	27.6424	22.7128	2.46913	2.40305	3.21605	4.27492	4.40139	3.98719
ASHGA5P005308	0.00202147	0.0173211	2.20023	down	protein_coding	ENST00000394342	CCDS1889.1	PROKR1	GENCODE	1182	chr2	+	68872953	68882708		CCATTGACAGGTATCTGGCTATTGTCCATCCGCTGAGACCACGGATGAAGTGCCAAACAG	10887	Hs.683430	GO:0007186|GO:0006916|GO:0016021|GO:0005886|GO:0004983	prokineticin receptor 1 [Source:HGNC Symbol;Acc:4524]	5.37674	19.5612	2.62945	3.7671	5	6.13022	5	21.0553	19.4087	18.2196	2.46913	2.92329	2.49594	3.79636	3.85403	3.65092
ASHGA5P032405	0.0011156	0.0126766	4.55665	down	protein_coding	NM_033059	CCDS45675.1	KRTAP4-11	RefSeq	1174	chr17	-	39273433	39274606	NM_031960	ATATTATTTGTCTGTCAGCCTTTCAGTCATTCTTTTCTCTTGGAAAGGTAGGAGGCTGCC	653240	Hs.307015	GO:0045095	keratin-associated protein 4-11	9.81181	79.3821	3.74177	5.92974	11.0152	13.2622	5.15806	85.9488	75.1476	77.05	4.07797	3.91432	3.23302	5.97314	5.96186	5.85422
ASHGA5P002396	9.59101e-05	0.00409965	2.36542	down	protein_coding	NM_004846	CCDS2496.1	EIF4E2	RefSeq	1014	chr2	+	233415356	233433920		ACAGCATCAAAATGCCAGGCAGGCTGGGCCCCCAAAGGCTCCTTTTTCAAAACCTCTGGA	9470	Hs.292026	GO:0000339|GO:0003743|GO:0005515|GO:0005829|GO:0005845|GO:0006417|GO:0008135|GO:0019221|GO:0031625	eukaryotic translation initiation factor 4E type 2	6994.43	18734.2	12.7632	14.0053	7271.64	7519.31	6192.34	18831.3	18653	18718.2	12.862	12.6157	12.8119	13.9855	13.9763	14.0542
ASHGA5P011053	0.00324111	0.0227019	3.23018	down	protein_coding	NM_032131	CCDS5069.2	ARMC2	RefSeq	3413	chr6	+	109169618	109295352		ATATTGCCAGAATATTCAGCAAACTTACTTCTTACCGTGACTGCTGCACAGCCTTGGCCA	84071	Hs.645481		armadillo repeat-containing protein 2	6.09048	30.1555	2.75055	4.44217	5	8.27144	5	31.3534	28.8164	30.2968	2.46913	3.28659	2.49594	4.42729	4.46758	4.43164
ASHGA5P037046	0.0297329	0.0886979	2.16283	down	protein_coding	NM_020336	CCDS13305.1	RALGAPB	RefSeq	8636	chr20	+	37101485	37207504		AGACTTGCTTGGGCACAACAGCTTTGTCTTTTACCCAGAGGAGCAAAAGCAAATCAGAAG	57148	Hs.598850	GO:0005622|GO:0017123|GO:0032859|GO:0046982|GO:0046982	ral GTPase-activating protein subunit beta	109.93	304.856	6.8308	7.94371	59.2452	186.247	84.2984	384.909	230.331	299.327	6.29788	7.30392	6.89059	8.2521	7.67687	7.90216
ASHGA5P012065	0.00031029	0.0068213	4.48945	down	protein_coding	ENST00000375494	CCDS13212.1	BPIFB3	GENCODE	1454	chr20	+	31643229	31661434		ATTTTTCCAATTCAGTTCTGGAGATCGTAGAGAATGCTGTTGTGCTGACCGTGGCATCCT	359710	Hs.472442	GO:0045087|GO:0005737|GO:0005576|GO:0005488|GO:0008289	BPI fold containing family B, member 3 [Source:HGNC Symbol;Acc:16178]	5	34.1732	2.45604	4.62258	5	5	5	37.2837	37.9179	27.3181	2.46913	2.40305	2.49594	4.69195	4.90071	4.27508
ASHGA5P005924	0.0101732	0.0441542	3.2536	down	protein_coding	NM_001010855		PIK3R6	RefSeq	3061	chr17	-	8706054	8770994		TCTCAGAGAACTGGAGAAGGCGGAAAGCCAGGACCTCCGGCATGTCATCATTCCCTTGCT	146850	Hs.255809	GO:0001525|GO:0005515|GO:0005829|GO:0005944|GO:0006644|GO:0006661|GO:0007186|GO:0007596|GO:0016020|GO:0030168|GO:0043406|GO:0044281|GO:0045766|GO:0046934|GO:0046935	phosphoinositide 3-kinase regulatory subunit 6	7.07131	39.117	3.14017	4.8422	8.4445	7.76942	5	42.5957	40.1859	34.5695	3.72685	3.1977	2.49594	4.89447	4.99145	4.64068
ASHGA5P032086	0.0292507	0.087805	2.31808	down	protein_coding	NM_003555	CCDS11020.1	OR1G1	RefSeq	942	chr17	-	3029903	3030845		CAAGAAATAAAGTCTTCCCTGAGAAAGTTAATCTGGGTTCGGAAAATTCATTCCCCTTAG	8390	Hs.248183	GO:0004930|GO:0004984|GO:0005886|GO:0007165|GO:0016021	olfactory receptor 1G1	6.93636	28.1062	3.11682	4.32975	8.49134	7.31775	5	27.1067	26.6307	30.581	3.73392	3.12059	2.49594	4.19471	4.34767	4.44687
ASHGA5P014525	0.00119561	0.0130888	2.30673	down	protein_coding	NM_020773	CCDS3394.2	TBC1D14	RefSeq	5009	chr4	+	6911494	7034845		GCTAACTCCGTTTCTCCTTGGACCAAGATGACTGATGGAAAACTCTCCACCTCTACAAAT	57533	Hs.518611	GO:0005097|GO:0005776|GO:0010507|GO:0019901|GO:2000785	TBC1 domain family member 14 isoform a	34.4423	128.881	5.45169	6.65754	38.1405	41.1531	24.0334	140.832	116.26	129.553	5.7247	5.39196	5.23842	6.7186	6.62297	6.63105
ASHGA5P005954	0.00951759	0.0423985	2.85547	down	protein_coding	NM_002728	CCDS7955.1	PRG2	RefSeq	874	chr11	-	57154833	57158130		TCAAGCTTGGTTTACTTGCCGGAGGTGCTACAGGGGCAACCTGGTTTCCATCCACAACTT	5553	Hs.512633	GO:0005576|GO:0006955|GO:0008201|GO:0030133|GO:0030246|GO:0042742	bone marrow proteoglycan isoform 1 preproprotein	5.8501	26.8488	2.7088	4.22253	5	7.55029	5	23.9894	20.9706	35.5864	2.46913	3.16133	2.49594	4.00536	3.97608	4.68614
ASHGA5P013629	0.0170167	0.0611357	2.64257	down	protein_coding	NM_014951	CCDS31209.1	ZNF365	RefSeq	4223	chr10	+	64133915	64162217		AAGCCCAAATGCCTAAGCCGAGGGCACCCGCATTCGGTATGTAACCACCCTGATCTCAAG	22891	Hs.22653	GO:0005515|GO:0005815|GO:0008270	protein ZNF365 isoform A	6.67013	26.4848	2.83523	4.23717	5	10.0104	5	29.3143	23.4939	26.6463	2.46913	3.54063	2.49594	4.32317	4.15311	4.23524
ASHGA5P001109	0.000940651	0.0116623	2.16414	down	protein_coding	NM_006158		NEFL	RefSeq	3602	chr8	-	24808468	24814131		CAACGTGAAGATGGCTTTGGATATTGAGATTGCAGCTTACAGGAAACTCTTGGAAGGCGA	4747	Hs.521461	GO:0005200|GO:0005515|GO:0005829|GO:0005883|GO:0007268|GO:0008022|GO:0008089|GO:0008090|GO:0019896|GO:0030424|GO:0033596|GO:0033693|GO:0033693|GO:0042802|GO:0045109	neurofilament light polypeptide	5	17.3566	2.45604	3.56983	5	5	5	16.5553	15.2564	20.2581	2.46913	2.40305	2.49594	3.41489	3.479	3.81562
ASHGA5P055060	0.00144152	0.0144889	2.1342	down	protein_coding	NM_001364	CCDS41696.1	DLG2	RefSeq	7737	chr11	-	83166055	84634465		ACCGGTCCATATGCTCCTTATTTACTGCAATGTTCTTTGCATGTTACTGTGCACTCCGGA	1740	Hs.367656	GO:0004385|GO:0005515|GO:0005886|GO:0010923|GO:0014069|GO:0030054|GO:0045211	disks large homolog 2 isoform 2	6.12828	27.7791	3.22051	4.3142	5.55141	6.65539	6.17803	29.8317	27.3621	26.1436	3.19631	3.01157	3.45364	4.35177	4.38644	4.2044
ASHGA5P055383	0.00577741	0.0310959	2.11636	down	protein_coding	NM_002733	CCDS8777.1	PRKAG1	RefSeq	1744	chr12	-	49396054	49412629	NM_001206709	GGGCCTGCCCCAAGAGAGTTTCCTAAAGCGAGGAAACCAAGCCGGGCGCCTCTTGCAATG	5571	Hs.530862	GO:0004679|GO:0004691|GO:0005515|GO:0005524|GO:0005654|GO:0005829|GO:0006110|GO:0006468|GO:0006633|GO:0007050|GO:0007165|GO:0007283|GO:0008286|GO:0008603|GO:0016208|GO:0019901|GO:0031588|GO:0043531|GO:0045860|GO:0046320|GO:0051291	5'-AMP-activated protein kinase subunit gamma-1 isoform 1	76.0159	238.987	6.51124	7.59283	78.7742	79.9371	69.3365	234.787	263.73	218.444	6.67388	6.23584	6.62399	7.49242	7.88028	7.40578
ASHGA5P011414	0.014717	0.0557192	5.41774	down	protein_coding	NM_000770	CCDS7438.1	CYP2C8	RefSeq	1924	chr10	-	96796528	96829254	NM_001198855	TTTCACCAATTTCTCAAAAGTCTATGGTCCTGTGTTCACCGTGTATTTTGGCATGAATCC	1558	Hs.709188	GO:0004497|GO:0005506|GO:0005783|GO:0005789|GO:0006082|GO:0006805|GO:0009055|GO:0017144|GO:0020037|GO:0034875|GO:0042738|GO:0044281|GO:0055114|GO:0070330|GO:0070989	cytochrome P450 2C8 isoform a precursor	11.1067	87.3904	3.63551	6.0732	14.911	13.4093	5	95.2056	81.6732	85.2924	4.48271	3.92788	2.49594	6.12429	6.0903	6.00502
ASHGA5P051126	4.49017e-05	0.0029626	2.97019	down	protein_coding	NM_101395	CCDS42926.1	DYRK1A	RefSeq	5517	chr21	+	38739858	38887679		CCAGGTGCCTTTAGAATGACCGTATCATTTACCCTAGAGGTTCATGACGTTCCTGTCTAA	1859	Hs.368240	GO:0000278|GO:0004672|GO:0004674|GO:0004712|GO:0004713|GO:0004715|GO:0005515|GO:0005524|GO:0005634|GO:0005654|GO:0006468|GO:0007399|GO:0016607|GO:0018107|GO:0018108|GO:0018108|GO:0030529|GO:0043518|GO:0043621|GO:0046777|GO:0048156|GO:0090312	dual specificity tyrosine-phosphorylation-regulated kinase 1A isoform 3	5	23.1634	2.45604	4.0266	5	5	5	22.2484	21.896	25.3456	2.46913	2.40305	2.49594	3.88531	4.04091	4.15357
ASHGA5P015638	0.0338024	0.09683	2.53413	down	protein_coding	NM_001080511	CCDS47724.1	CLEC2L	RefSeq	1288	chr7	+	139208673	139229731		CTTCTGTTCGCCATCTTGGTGGTGATGAGCATCTTGGCTTCCAAGGGCTGCATCAAGTGC	154790	Hs.57806	GO:0016021|GO:0030246	C-type lectin domain family 2 member L	6.96065	31.1977	3.15269	4.49418	5	7.20128	8.68068	33.2759	32.5365	27.7806	2.46913	3.10283	3.88612	4.52195	4.65992	4.30067
ASHGA5P013232	0.00357996	0.023782	2.04875	down	protein_coding	NM_152899	CCDS12787.1	IL4I1	RefSeq	1798	chr19	-	50392913	50400147		AGGACCGCGCTGTCCTGCTGTCACCAAGAGCTGGAGACACCATCTCCCACCGAGAGTCAT	259307		GO:0001716|GO:0005576|GO:0005764|GO:0009072|GO:0031965|GO:0043231	L-amino-acid oxidase isoform 1 precursor	257.502	656.921	8.09119	9.12594	282.056	266.679	223.771	680.813	585.177	704.772	8.34763	7.78193	8.14402	9.11213	9.07692	9.18877
ASHGA5P054445	0.00103056	0.0121263	3.25232	down	protein_coding	ENST00000374312	CCDS31193.1	PPYR1	GENCODE	1956	chr10	+	47083533	47088320		GTATCACTTAGTTCAAGAGTCCTGGAATCTTTTCACATCCACTATGAACACCTCTCACCT	5540	Hs.524719	GO:0007186|GO:0007586|GO:0007631|GO:0008015|GO:0016021|GO:0005886|GO:0005887|GO:0004930|GO:0042277|GO:0001601|GO:0001602	pancreatic polypeptide receptor 1 [Source:HGNC Symbol;Acc:9329]	5	25.6708	2.45604	4.15751	5	5	5	33.8952	20.6882	22.429	2.46913	2.40305	2.49594	4.55192	3.95333	3.96728
ASHGA5P009681	0.000216087	0.00579061	3.03386	down	protein_coding	NM_198904	CCDS4359.1	GABRG2	RefSeq	3957	chr5	+	161494647	161582545	NM_198903	CCAAGCAAGGACAAAGATAAAAAGAAGAAAAACCCTCTTCTTCGGATGTTTTCCTTCAAG	2566	Hs.7195	GO:0004890|GO:0005230|GO:0005254|GO:0005515|GO:0005886|GO:0005887|GO:0006810|GO:0007214|GO:0007268|GO:0008503|GO:0030054|GO:0032590|GO:0034220|GO:0034707|GO:0045211|GO:0051932|GO:0055085	gamma-aminobutyric acid receptor subunit gamma-2 isoform 1 precursor	7.3204	43.8855	3.42093	5.02209	7.92853	8.83103	5.20164	44.4892	40.5428	46.6245	3.646	3.37597	3.24083	4.96473	5.00524	5.09629
ASHGA5P007512	0.000181666	0.00534851	2.24029	down	protein_coding	NM_018464	CCDS7251.1	CISD1	RefSeq	2115	chr10	+	60028861	60049019		AGCGTACGAGTTGAATGGATCGCAGCAGTTACCATTGCTGCTGGGACAGCTGCAATTGGT	55847	Hs.370102	GO:0005739|GO:0005741|GO:0016021|GO:0043457|GO:0046872|GO:0051537	CDGSH iron-sulfur domain-containing protein 1	6098.54	15265.8	12.5635	13.7272	5709.66	6713.77	5872.2	15712.6	15475	14609.9	12.5236	12.4381	12.7288	13.7303	13.7466	13.7046
ASHGA5P049605	0.00236155	0.0189856	2.12728	down	protein_coding	NM_024857	CCDS11260.1	ATAD5	RefSeq	6245	chr17	+	29159022	29222295		TCACCAAAAAGTAGTGGACCAAAGCGAGCACTTCCTCCCAAAACCTTGGCAAATTATTTT	79915	Hs.528902	GO:0005524|GO:0005634|GO:0006974|GO:0017111	ATPase family AAA domain-containing protein 5	1041.69	2507.38	9.97755	11.0666	780.529	1402.88	941.673	2462.33	2240.45	2819.35	9.70562	10.1116	10.1155	10.9885	10.981	11.2302
ASHGA5P005653	0.0140095	0.0540503	3.27454	down	protein_coding	ENST00000308287	CCDS7992.1	MS4A10	GENCODE	2296	chr11	+	60552820	60568778		AAACTTACCTGAAGATGTTGTGCCTGATGACAAACCTCATCAGCCTCTTTTGCGTGCTGT	341116	Hs.591956	GO:0016021|GO:0004872|GO:0005515	membrane-spanning 4-domains, subfamily A, member 10 [Source:HGNC Symbol;Acc:13368]	7.07595	39.0069	3.13246	4.84375	9.43732	6.79054	5	40.0581	40.9661	35.9964	3.86839	3.03303	2.49594	4.80257	5.02304	4.70562
ASHGA5P005840	0.00153841	0.0149481	2.31109	down	protein_coding	NM_024607	CCDS5973.1	PPP1R3B	RefSeq	5574	chr8	-	8993763	9008220		GGCCCAAAAGCCTGTTCATCTAGCCCCATGATGGCTGTGGACATCGAGTACAGATACAAC	79660	Hs.458513	GO:0005977	protein phosphatase 1 regulatory subunit 3B	6.77222	32.2203	3.32611	4.53468	5.75741	8.89086	5.66839	28.331	30.3244	38.0054	3.24198	3.38705	3.34929	4.26615	4.54912	4.78878
ASHGA5P039978	3.49196e-05	0.00276415	3.68295	down	protein_coding	NM_001133	CCDS3557.1	AFM	RefSeq	1997	chr4	+	74347461	74369718		TACTGACAGTGAAAATGTGTGTCAAGAACGAGATGCTGACCCAGACACCTTCTTTGCGAA	173	Hs.168718	GO:0005576|GO:0005615|GO:0008431|GO:0051180	afamin precursor	5	28.3089	2.45604	4.3369	5	5	5	32.0628	27.3393	25.5244	2.46913	2.40305	2.49594	4.46033	4.38519	4.16519
ASHGA5P050781	0.000131206	0.00470209	2.46555	down	protein_coding	NM_006891	CCDS2378.1	CRYGD	RefSeq	724	chr2	-	208986330	208989313		GCTCAGCGCCGCCGCCCCACCAGCTCAGCACCGCCGTGCGCCCAGCCAGCCATGGGGAAG	1421	Hs.546247	GO:0002088|GO:0005212|GO:0005515|GO:0005634|GO:0005737|GO:0007601|GO:0034614|GO:0070306	gamma-crystallin D	2036.36	5722.92	10.9662	12.2681	1975.26	2491	1642.8	6002.13	4994.87	6171.77	11.0332	10.9365	10.929	12.2855	12.1161	12.4028
ASHGA5P008447	4.81115e-06	0.00177926	2.79794	down	protein_coding	NM_001044390	CCDS41409.1	MUC1	RefSeq	1010	chr1	-	155158299	155162706	NM_001204296	GTTTTCTGGGCCTCTCCAATATTAAGTTCAGTGAGTGATGTGCCATTTCCTTTCTCTGCC	4582	Hs.89603	GO:0000790|GO:0000978|GO:0002039|GO:0003712|GO:0005515|GO:0005576|GO:0005737|GO:0005796|GO:0005887|GO:0006977|GO:0006978|GO:0009986|GO:0010944|GO:0016266|GO:0016324|GO:0036003|GO:0043618|GO:0043687|GO:0044267|GO:0090240	mucin-1 isoform 5 precursor	60.2805	252.489	6.19527	7.67963	56.8117	73.7117	50.3182	276.839	228.305	252.323	6.24026	6.13904	6.20651	7.74266	7.66545	7.63078
ASHGA5P042192	0.0361474	0.101263	2.36429	down	protein_coding	NM_003247	CCDS34574.1	THBS2	RefSeq	5826	chr6	-	169615874	169654137		ATATTTAAACAAGATTTGCTGCATTTCCGGCAATGCCCTGTGCATGCCATGGTCCCTAGA	7058	Hs.371147	GO:0005509|GO:0005515|GO:0005576|GO:0005604|GO:0007155|GO:0008201|GO:0016525|GO:0051965	thrombospondin-2 precursor	7.86916	31.3999	3.26223	4.50364	8.40082	10.2067	5	28.7913	30.6393	34.7692	3.71918	3.57155	2.49594	4.2944	4.56625	4.65026
ASHGA5P004122	0.0315392	0.0923903	2.21861	down	protein_coding	NM_013341	CCDS2255.1	OLA1	RefSeq	4356	chr2	-	174937174	175113365		GCCGAGCACGATGCCCCCTAAAAAGGGAGGTGATGGAATTAAACCACCCCCAATCATTGG	29789	Hs.157351	GO:0005515|GO:0005524|GO:0005525|GO:0005730|GO:0005737|GO:0006200|GO:0016787	obg-like ATPase 1 isoform 1	316.828	770.016	8.19264	9.3423	165.081	559.049	226.354	962.805	619.575	727.669	7.64918	8.77159	8.15715	9.62405	9.1663	9.23655
ASHGA5P007116	0.00237257	0.0190449	2.16504	down	protein_coding	NM_001184992	CCDS54104.1	RNF135	RefSeq	2254	chr17	+	29297955	29326929	NM_032322	CTGAGCATCCTGGGCAAGGCTTTTTCTTCTGGGGTGGATCTTTCCATGGCTTCTCCAAAG	84282	Hs.29874	GO:0004842|GO:0005515|GO:0005737|GO:0005829|GO:0008270|GO:0016567|GO:0032480|GO:0032728|GO:0043021|GO:0045087|GO:0045088	E3 ubiquitin-protein ligase RNF135 isoform 3	52.9469	173.194	5.98278	7.09718	52.1429	72.9596	33.7384	181.335	145.742	192.503	6.12994	6.12409	5.69433	7.09967	6.96594	7.22592
ASHGA5P056069	0.00796898	0.0377157	2.10297	down	protein_coding	NM_015484	CCDS259.1	SYF2	RefSeq	1777	chr1	-	25548766	25559013		ACCTGCAAATTGGGAAGCCAAAAAAGCTCGTTTGGAGTGGGAACTAAAGGAAGAGGAAAA	25949	Hs.20013	GO:0000398|GO:0005634|GO:0005634|GO:0071013	pre-mRNA-splicing factor SYF2 isoform 1	5118.62	11596.8	12.2398	13.3122	5086.22	7135.64	3134	11861.5	12094.6	10834.2	12.361	12.5382	11.8201	13.3119	13.3672	13.2575
ASHGA5P019759	0.000841567	0.0110443	2.03644	down	protein_coding	NM_173655	CCDS54616.1	EPHA6	RefSeq	1617	chr3	+	97158489	97367421		AGATGATCCAGAAGCTGCTTATACAACAACTGACCTCTTCCAAACTCTAACACTTAACCT	285220	Hs.653244	GO:0003674|GO:0005003|GO:0005524|GO:0005575|GO:0005887|GO:0008150	ephrin type-A receptor 6 isoform b	21.3388	76.8174	4.85036	5.8764	22.1974	22.9996	18.8194	80.204	71.2184	79.0297	5.00967	4.63046	4.91093	5.86269	5.87358	5.89294
ASHGA5P053684	0.000133203	0.00472892	2.58318	down	protein_coding	NM_001001790	CCDS43803.1	TOMM5	RefSeq	773	chr9	-	37588411	37592636	NM_001134484, NM_001134485	CAGAGCCGCGATGTTCCGGATTGAGGGCCTCGCGCCGAAGCTGGACCCGGAGGAGATGAA	401505	Hs.130774	GO:0005739|GO:0005742|GO:0006626|GO:0006626|GO:0008565|GO:0016021|GO:0044267	mitochondrial import receptor subunit TOM5 homolog isoform 1	5992.65	17353.1	12.5324	13.9016	5701.83	7111.98	5164.13	16709.1	16231.9	19118.3	12.5213	12.5309	12.5451	13.8141	13.8003	14.0904
ASHGA5P055753	0.00633207	0.0328854	2.07777	down	protein_coding	NM_203451	CCDS9358.1	SERTM1	RefSeq	3219	chr13	+	37248048	37271975		TTTCATCCTGAGGAAAATGGAAGAGTCCTTGAGTGTGGCAGCAGTTTTGACATCCCCTTA	400120	Hs.422375	GO:0016021	serine-rich and transmembrane domain-containing protein 1	13.6837	52.9403	4.24477	5.2998	15.4435	15.2348	10.3728	46.0391	53.4947	59.2871	4.52958	4.09159	4.11314	5.01625	5.42501	5.45815
ASHGA5P011999	0.00354814	0.0237151	3.15655	down	protein_coding	NM_001030313	CCDS33341.1	CERKL	RefSeq	3019	chr2	-	182401400	182521834		GATGTAACAAGATCTACCAATGTATTGGCACATTCTCTTCATGGAGTTCCTCATGTGATA	375298	Hs.732358	GO:0004143|GO:0005730|GO:0005730|GO:0005737|GO:0005783|GO:0005783|GO:0005794|GO:0005794|GO:0007205	ceramide kinase-like protein isoform 4	5.19099	28.6187	2.7	4.35835	5.57298	5	5	26.6275	28.2094	31.0191	3.201	2.40305	2.49594	4.16708	4.43496	4.473
ASHGA5P053651	0.00541546	0.0298873	2.31201	down	protein_coding	NM_001031689	CCDS35000.1	PLAA	RefSeq	4954	chr9	-	26903367	26947468		CCAGGCAGGACAAAAACTCATGATGTCCCAGAGGGAATCACTGATGTCCCATGCAATAGA	9373	Hs.27182	GO:0005515|GO:0006644|GO:0007165|GO:0016005	phospholipase A-2-activating protein	2430.81	6447.1	11.2072	12.4164	2632.05	2733.4	1926.98	7775.92	6765.25	4800.12	11.4063	11.0732	11.1422	12.6607	12.5601	12.0284
ASHGA5P003022	0.000309073	0.00680842	2.09229	down	protein_coding	NM_170662	CCDS2948.1	CBLB	RefSeq	3976	chr3	-	105377108	105587887		ACAGGACGCCCTCTGATTATGATCTTCTCATCCCTCCATTAGGTGAAGATGCTTTTGATG	868	Hs.430589	GO:0001784|GO:0002669|GO:0004842|GO:0004871|GO:0005509|GO:0005515|GO:0005634|GO:0005730|GO:0005737|GO:0005829|GO:0005886|GO:0006607|GO:0006955|GO:0007165|GO:0007166|GO:0008270|GO:0009629|GO:0009725|GO:0019901|GO:0035556|GO:0042110|GO:0045121|GO:0045732|GO:0046642|GO:0050860	E3 ubiquitin-protein ligase CBL-B	245.582	623.5	7.98122	9.04631	205.251	345.161	186.333	664.512	532.64	673.347	7.91596	8.11999	7.9077	9.07394	8.93254	9.13244
ASHGA5P052356	0.00069172	0.00999574	3.39014	down	protein_coding	NM_001744	CCDS4103.1	CAMK4	RefSeq	2272	chr5	+	110559946	110820748		TGAAATTCTTAGAGGTTGTGCCTATGGACCTGAGGTGGACATGTGGTCTGTAGGAATAAT	814	Hs.591269	GO:0002372|GO:0004683|GO:0005516|GO:0005524|GO:0005634|GO:0005654|GO:0005730|GO:0005730|GO:0005829|GO:0006468|GO:0006913|GO:0006954|GO:0007165|GO:0007173|GO:0007202|GO:0007268|GO:0007270|GO:0007616|GO:0008543|GO:0033081|GO:0043011|GO:0045670|GO:0045893|GO:0046827|GO:0048011	calcium/calmodulin-dependent protein kinase type IV	5.46759	29.5145	2.64337	4.40472	5	6.40278	5	28.5564	26.6231	33.3639	2.46913	2.96505	2.49594	4.2805	4.34737	4.58629
ASHGA5P019109	0.00810451	0.0381067	2.27639	down	protein_coding	NM_001034914	CCDS33245.1	KCNIP3	RefSeq	2735	chr2	+	96012767	96051825		AAGCAGTTCGGCATCCTGGAGCCCATATCCATGGAAGATAGCAGCGACAGTGAGCTGGAG	30818	Hs.437376	GO:0000122|GO:0003677|GO:0003714|GO:0005244|GO:0005267|GO:0005509|GO:0005634|GO:0005783|GO:0005794|GO:0005829|GO:0005886|GO:0006351|GO:0006357|GO:0006915|GO:0007165|GO:0007610|GO:0008022|GO:0019233|GO:0043523|GO:0048265|GO:0048306	calsenilin isoform 2 precursor	5.34626	20.5261	2.62301	3.80975	5	6.03879	5	18.2862	17.2244	26.0678	2.46913	2.90394	2.49594	3.5636	3.66468	4.20098
ASHGA5P032398	0.00537012	0.029756	2.18427	down	protein_coding	NM_030966	CCDS42323.1	KRTAP1-3	RefSeq	986	chr17	-	39190136	39191107		CGTCCTGCAAATTGCACCCCCTATGAAAGAGGAATAATATACCAAGGTCTAATAAATTTT	81850	Hs.534495	GO:0005576|GO:0008150|GO:0030280|GO:0045095	keratin-associated protein 1-3	284.888	767.312	8.22851	9.35566	309.472	284.013	261.178	842.689	767.585	691.662	8.46672	7.87118	8.34763	9.42968	9.47074	9.16658
ASHGA5P047865	0.000111506	0.00434954	2.18494	down	protein_coding	NM_001005567	CCDS31378.1	OR51B5	RefSeq	1458	chr11	-	5363743	5526882		TTCTTTCACATGCATTCTGCCTTCACCAGGATGTCATTAAACTCGCCTGTGCTGATACCA	282763	Hs.690458	GO:0004930|GO:0004984|GO:0005886|GO:0007608|GO:0016021|GO:0050911	olfactory receptor 51B5	28.4371	105.563	5.22042	6.34801	27.9811	33.9861	23.3441	113.127	90.3869	113.175	5.31905	5.1427	5.19949	6.37287	6.24549	6.42568
ASHGA5P011189	0.0488441	0.123989	2.20185	down	protein_coding	NM_017649	CCDS44474.1	CNNM2	RefSeq	4214	chr10	+	104678074	104838344		TTTGTTGTCAGCAGAACAGAGTTGTTAGCAGCAGGTTCTCCAGGTGAAAATAAGTCCCCT	54805	Hs.740547	GO:0010960|GO:0015693|GO:0016021|GO:0016323	metal transporter CNNM2 isoform 1	7.93318	29.5565	3.27185	4.41056	9.15879	9.64075	5	31.5823	29.8039	27.2833	3.83045	3.48914	2.49594	4.43924	4.51931	4.27314
ASHGA5P001297	0.0134331	0.0525602	2.40161	down	protein_coding	ENST00000226574	CCDS3657.1	NFKB1	GENCODE	4085	chr4	+	103422485	103538459	NM_001165412	GACTCGCCACCCGGCTTCAGAATGGCAGAAGATGATCCATATTTGGGAAGGCCTGAACAA	4790	Hs.618430	GO:0045087|GO:0006915|GO:0000122|GO:0045893|GO:0006954|GO:0045892|GO:0006355|GO:0007165|GO:0045944|GO:0008063|GO:0006366|GO:0090263|GO:0006916|GO:0051092|GO:0002224|GO:0050852|GO:0006979|GO:0046688|GO:0010744|GO:0071347|GO:0071260|GO:0001818|GO:0009617|GO:0045083|GO:0048011|GO:0034142|GO:0002755|GO:0002756|GO:0034130|GO:0034134|GO:0034138|GO:0035666|GO:0032481|GO:0010884|GO:0010956|GO:0010957|GO:…	nuclear factor of kappa light polypeptide gene enhancer in B-cells 1 [Source:HGNC Symbol;Acc:7794]	18.193	71.3696	4.49608	5.76008	16.24	29.2599	9.07905	79.7352	63.3493	71.0243	4.59901	4.94818	3.94106	5.8544	5.69203	5.73383
ASHGA5P034562	0.0215224	0.0714766	4.34015	down	protein_coding	NM_022467	CCDS12433.1	CHST8	RefSeq	2496	chr19	+	34175433	34264414	NM_001127895, NM_001127896	ACTACATGGATTACCTGATGTTCAACTATTCCAAGCCCTTTGCAGATCTGTACTGAGGGG	64377	Hs.165724	GO:0000139|GO:0001537|GO:0006790|GO:0007417|GO:0016021|GO:0016051|GO:0030166|GO:0042446	carbohydrate sulfotransferase 8	7.95189	53.4885	3.20679	5.32453	13.4744	5.38122	5	52.5402	53.4692	54.4562	4.34518	2.77925	2.49594	5.21766	5.42429	5.33165
ASHGA5P042734	0.00173963	0.0158451	3.90214	down	protein_coding	ENST00000400926	CCDS5298.1	CCR6	GENCODE	3216	chr6	+	167525294	167552629	NM_031409	TGAACCATACACTCCTTTTTCTACAACCAGCTTGCATTTTTTCTGCCCACAATGAGCGGG	1235	Hs.46468	GO:0045087|GO:0007186|GO:0006955|GO:0007165|GO:0006968|GO:0006959|GO:0006935|GO:0006928|GO:0007204|GO:0070098|GO:0002407|GO:0016021|GO:0005886|GO:0005887|GO:0004872|GO:0016493|GO:0004950	chemokine (C-C motif) receptor 6 [Source:HGNC Symbol;Acc:1607]	27.4415	174.826	5.15571	7.11998	36.2243	25.496	20.6043	178.454	157.826	188.197	5.65535	4.77253	5.03925	7.07485	7.09398	7.1911
ASHGA5P000885	0.0051828	0.0291756	2.04861	down	protein_coding	ENST00000215479	CCDS14778.1	AMELY	GENCODE	802	chrY	-	6733958	6742068		ATATTTAAAGAACCATCAAGAAATGGGGACCTGGATTTTGTTTGCCTGCCTTGTGGGAGC	266	Hs.1238	GO:0007275|GO:0031214|GO:0005578|GO:0044420|GO:0030345	amelogenin, Y-linked [Source:HGNC Symbol;Acc:462]	53.6821	171.216	6.0598	7.09445	57.2493	52.7271	51.07	180.994	167.282	165.373	6.25113	5.7046	6.22367	7.09608	7.1923	6.99496
ASHGA5P004923	0.000593386	0.00934625	2.28806	down	protein_coding	NM_013274	CCDS7513.1	POLL	RefSeq	2741	chr10	-	103338638	103348027	NM_001174084, NR_033406	AATGCCCTCAAGAGCTTCCATAAGCCTGTCACCTCGTACCAGGAGGCCTGCAGTATCCCT	27343	Hs.523230	GO:0003677|GO:0003887|GO:0005634|GO:0006260|GO:0006289|GO:0016446|GO:0016829|GO:0046872	DNA polymerase lambda isoform a	150.546	457.949	7.38599	8.58011	137.715	182.416	131.508	439.898	399.353	534.595	7.4173	7.2778	7.46286	8.45522	8.4909	8.79422
ASHGA5P047623	0.00594166	0.0316644	2.94304	down	protein_coding	NM_018425	CCDS7469.1	PI4K2A	RefSeq	4185	chr10	+	99400442	99436187		TCTTTCCCGAGCGCATCTACCAGGGCTCCAGCGGAAGCTACTTCGTCAAGGACCCTCAGG	55361	Hs.25300	GO:0000287|GO:0004430|GO:0005515|GO:0005524|GO:0005739|GO:0005768|GO:0005829|GO:0005887|GO:0006644|GO:0006661|GO:0006661|GO:0030425|GO:0031083|GO:0031410|GO:0035651|GO:0035838|GO:0042734|GO:0043005|GO:0043025|GO:0044231|GO:0044281|GO:0045121	phosphatidylinositol 4-kinase type 2-alpha	6.37807	32.8659	3.02314	4.58045	7.10821	7.02602	5	33.3178	31.3388	33.9409	3.49804	3.07542	2.49594	4.52387	4.60254	4.61492
ASHGA5P021742	0.0308879	0.0911281	2.05882	down	protein_coding	NM_003300	CCDS9975.1	TRAF3	RefSeq	7654	chr14	+	103243815	103377837	NM_001199427	GGACCGCGAGAACTCCTCTTTCCTAAAATGGAGTCGAGTAAAAAGATGGACTCTCCTGGC	7187	Hs.510528	GO:0001817|GO:0002224|GO:0004842|GO:0004871|GO:0005515|GO:0005739|GO:0005768|GO:0005829|GO:0006915|GO:0006917|GO:0007165|GO:0008063|GO:0008270|GO:0009898|GO:0030162|GO:0031625|GO:0031996|GO:0032088|GO:0032480|GO:0032648|GO:0033209|GO:0034138|GO:0034142|GO:0035631|GO:0035666|GO:0045087|GO:0050688	TNF receptor-associated factor 3 isoform 1	6.05361	23.4332	2.97744	4.01926	5	8.1495	5.01134	22.2125	18.4705	29.6167	2.46913	3.2635	3.19969	3.88252	3.77727	4.39798
ASHGA5P038871	0.00519533	0.0291916	3.23834	down	protein_coding	NM_198177	CCDS46865.1	MITF	RefSeq	4671	chr3	+	69915374	70017488		AAAGATGGAGGCGCTTAGAGTTCAGATGTTCATGCCATGCTCCTTTGAAAGCTTGTATCT	4286	Hs.166017	GO:0001077|GO:0003677|GO:0005515|GO:0005634|GO:0006355|GO:0006461|GO:0007275|GO:0030318|GO:0043234|GO:0045893|GO:0045893|GO:0045944|GO:0046983	microphthalmia-associated transcription factor isoform 2	12.2957	73.3378	4.11097	5.80623	14.9654	9.96911	11.9526	72.9068	76.3519	70.7546	4.48721	3.53408	4.31163	5.70791	5.98382	5.72695
ASHGA5P049647	0.00821886	0.0384853	2.0433	down	protein_coding	NM_006160	CCDS11338.1	NEUROD2	RefSeq	3048	chr17	-	37760020	37764175		AGGAGCTCAATGCGTTTTTTCATAACTGAGACTTCGCGCCGGCTCCCTTCTTTTTCTTTT	4761	Hs.322431	GO:0001662|GO:0003700|GO:0003714|GO:0005634|GO:0006351|GO:0006357|GO:0007399|GO:0008306|GO:0016567|GO:0021695|GO:0031915|GO:0045666|GO:0046982|GO:0048666|GO:0050850|GO:0051091|GO:0070888|GO:0071257|GO:0071277|GO:0090129|GO:2000297	neurogenic differentiation factor 2	38.7832	130.412	5.64239	6.67328	41.7643	36.4575	38.1277	129.411	120.102	141.723	5.84269	5.23264	5.85182	6.58088	6.67388	6.7651
ASHGA5P051399	0.030198	0.0896487	2.58244	down	protein_coding	NM_001164839	CCDS2596.1	C3orf24	RefSeq	865	chr3	-	10145818	10149915	NM_173472	ACTTACAAAAAGTGCACCTTTGCCTTGCAGCACTCCAAGTAAAGGGTCCTCATTTGATCC	115795	Hs.190413		uncharacterized protein C3orf24	8.34199	35.3779	3.32306	4.6918	8.65727	11.3687	5	35.5329	33.1376	37.4632	3.76006	3.71319	2.49594	4.62029	4.68799	4.76712
ASHGA5P011984	0.000188367	0.0054152	2.4413	down	protein_coding	NM_002800	CCDS4759.1	PSMB9	RefSeq	1048	chr6	+	32821937	32827628		ACCACAGACGCTATTGCTCTGGCCATGAGCCGGGATGGCTCAAGCGGGGGTGTCATCTAC	5698	Hs.654585	GO:0000075|GO:0000082|GO:0000084|GO:0000209|GO:0000216|GO:0000278|GO:0000502|GO:0002474|GO:0002479|GO:0004298|GO:0005515|GO:0005654|GO:0005829|GO:0005839|GO:0006521|GO:0006915|GO:0006977|GO:0010467|GO:0016032|GO:0016070|GO:0016071|GO:0019048|GO:0031145|GO:0034641|GO:0042590|GO:0042981|GO:0044281|GO:0051436|GO:0051437|GO:0051439	proteasome subunit beta type-9 proprotein	778.235	2179.59	9.56657	10.8542	790.879	924.913	618.912	2136.69	2036.64	2365.45	9.72605	9.4729	9.50077	10.7597	10.8522	10.9508
ASHGA5P007648	0.00719926	0.0355034	2.47386	down	protein_coding	NM_001042535	CCDS55185.1	AGAP3	RefSeq	2063	chr7	+	150783825	150820725		CATCTTCACGATATGTGCCACTGTTTCCAACTTTTCATCAACAAAAAGGCCTTTCCAACT	116988	Hs.647075	GO:0003924|GO:0005525|GO:0005543|GO:0005737|GO:0007264|GO:0008060|GO:0008270|GO:0016020|GO:0032312	arf-GAP with GTPase, ANK repeat and PH domain-containing protein 3 isoform b	26.3495	103.344	5.01443	6.32119	24.5092	40.3181	14.2211	98.6185	98.2211	113.192	5.1426	5.36413	4.53657	6.17598	6.36173	6.42586
ASHGA5P026177	8.16901e-05	0.00382669	4.2563	down	protein_coding	ENST00000307401	CCDS31414.1	OR2AG1	GENCODE	998	chr11	+	6806247	6807245		AAATTCTACTCACTGTGCTCCATATGCCATCAAATGAGGGGAGGAAGAAAGCCCTTGTCA	144125	Hs.553608	GO:0007186|GO:0016021|GO:0005886|GO:0004930|GO:0004984	olfactory receptor, family 2, subfamily AG, member 1 [Source:HGNC Symbol;Acc:15142]	8.26123	66.6146	3.56776	5.65735	6.13202	11.0957	7.55595	68.8602	61.9031	69.0804	3.31601	3.67877	3.70849	5.6248	5.65394	5.69332
ASHGA5P009327	0.000274678	0.00644495	2.0021	down	protein_coding	NM_006599	CCDS10881.1	NFAT5	RefSeq	13253	chr16	+	69599868	69738569	NM_173214, NM_173215	TACTCGCGAGAATCTGTCTATGATCTTCTCCCAAAGGAGTTACAGTTACCTCCATCTAGA	10725	Hs.371987	GO:0003677|GO:0003700|GO:0005634|GO:0006366|GO:0007165|GO:0007588	nuclear factor of activated T-cells 5 isoform c	62.1887	187.128	6.22566	7.22717	61.4265	77.4873	47.6523	183.93	174.533	202.922	6.34653	6.19793	6.13253	7.12237	7.25582	7.30333
ASHGA5P042253	0.0346957	0.0984602	3.92884	down	protein_coding	ENST00000379426	CCDS43425.1	TMEM170B	GENCODE	8362	chr6	+	11538510	11583757		TCTCTGTCATTGCAGTCAGCATTGGATTTCTGGCTTCTGTAACTGGAGCGATGATTACCA	100113407	Hs.146317	GO:0016021	transmembrane protein 170B [Source:HGNC Symbol;Acc:34244]	11.7295	60.3808	3.52748	5.50158	6.72734	23.4612	5	67.7122	56.1132	57.3171	3.43088	4.65561	2.49594	5.60081	5.49597	5.40797
ASHGA5P033080	0.00751085	0.0364284	2.97957	down	protein_coding	ENST00000366696	CCDS1572.1	HIST3H3	GENCODE	481	chr1	-	228612545	228613026		GCTATCTCGCCACCTGAGAGGTTGCGCAACGTTCACCCCAAAGGCTCTTTTAAGAGCCAC	8290	Hs.248171	GO:0006334|GO:0000723|GO:0005634|GO:0000786|GO:0005654|GO:0003677|GO:0005515	histone cluster 3, H3 [Source:HGNC Symbol;Acc:4778]	19.7375	94.2996	4.60657	6.18167	19.2637	30.4868	9.46195	105.791	83.3634	93.7444	4.82476	5.00301	3.99193	6.27585	6.11885	6.15032
ASHGA5P013083	0.000168274	0.00523979	2.59779	down	protein_coding	NM_001047434	CCDS43058.1	DPH3	RefSeq	3990	chr3	-	16298567	16306496		ATTTCTATCCCTGCCCATGTGGAGATAACTTCTCCATCACCAAGGATCAGTTTGTGTGTG	285381	Hs.388087	GO:0005515|GO:0005634|GO:0005730|GO:0005737|GO:0017183|GO:0046872|GO:0050709|GO:0051099	DPH3 homolog isoform 2	2891.91	8434.8	11.4595	12.8368	2775.5	3220.69	2679.53	8870.1	8802.23	7632.06	11.4826	11.3119	11.5841	12.8633	12.9295	12.7176
ASHGA5P010436	0.0476243	0.121794	3.75711	down	protein_coding	NM_017641	CCDS31773.1	KIF21A	RefSeq	6614	chr12	-	39687029	39837192	NM_001173464	TCCTCCAGAAGGGGCATAATCAACCCATTTCCTGCTTCAAAAGGAATCAGAGCTTTTCCA	55605	Hs.374201	GO:0003777|GO:0005515|GO:0005524|GO:0005737|GO:0005874|GO:0007018	kinesin-like protein KIF21A isoform 2	8.24212	44.0995	3.1217	5.03132	14.7264	5	5	43.2114	44.6758	44.4112	4.4661	2.40305	2.49594	4.9159	5.15132	5.02675
ASHGA5P010790	0.00115519	0.0128878	2.72087	down	protein_coding	NM_007212	CCDS1365.1	RNF2	RefSeq	3551	chr1	+	185014550	185071740		ATACAGGCCATGAACAGACTGCAGCGAGGCAAGAAACAACAGATTGAAAATGGTAGTGGA	6045	Hs.591490	GO:0000122|GO:0000151|GO:0000278|GO:0001702|GO:0001739|GO:0003682|GO:0004842|GO:0005515|GO:0005634|GO:0005730|GO:0006351|GO:0008270|GO:0009948|GO:0016604|GO:0031519|GO:0035102|GO:0035518|GO:0071339|GO:0071535	E3 ubiquitin-protein ligase RING2	300.601	982.023	8.26146	9.70553	232.679	412.185	256.94	1178.85	951.525	815.692	8.08684	8.36954	8.328	9.92007	9.78041	9.41611
ASHGA5P052055	0.0030342	0.0218212	2.49248	down	protein_coding	NM_024574	CCDS3717.2	NDNF	RefSeq	2911	chr4	-	121956781	121993673		TAGGAAACAAGAACATCTTCACCGTCTCTGATCTGAAACCCGACACGCAGTACTACTTTG	79625	Hs.709520	GO:0001764|GO:0005539|GO:0005576|GO:0008201|GO:0010811|GO:0010976|GO:0016049|GO:0019800|GO:0030198|GO:0031012|GO:0043524	protein NDNF precursor	6.57036	33.7598	3.29352	4.61111	5.16352	7.9943	6.55327	32.7834	38.8285	29.6676	3.11505	3.23772	3.52778	4.49769	4.9361	4.39952
ASHGA5P001396	0.0457571	0.118364	2.93662	down	protein_coding	NM_001503	CCDS4553.1	GPLD1	RefSeq	5858	chr6	-	24426061	24489850		TTTGGTGGCGTTCTGCACTTGAGTGACCTGGATGATGATGGCTTAGATGAAATCATCATG	2822	Hs.533291	GO:0001503|GO:0002042|GO:0002062|GO:0002430|GO:0004621|GO:0004621|GO:0004630|GO:0005578|GO:0005615|GO:0005622|GO:0005737|GO:0006507|GO:0006507|GO:0008285|GO:0008286|GO:0009749|GO:0010595|GO:0010694|GO:0010867|GO:0010897|GO:0010907|GO:0010983|GO:0017080|GO:0032869|GO:0035690|GO:0035701|GO:0035774|GO:0043065|GO:0043231|GO:0044444|GO:0045919|GO:0046470|GO:0046470|GO:0051044|GO:0051047|GO:0070633|GO:…	phosphatidylinositol-glycan-specific phospholipase D precursor	7.4989	36.1442	3.15884	4.713	12.2238	5.27285	5	39.9864	30.0932	38.3529	4.21851	2.76208	2.49594	4.80034	4.53521	4.80344
ASHGA5P035374	0.00445132	0.0266906	4.13892	down	protein_coding	NM_145259	CCDS2205.1	ACVR1C	RefSeq	8892	chr2	-	158383278	158485399	NM_001111031	ATGCTGGAAAAACTCTGAAAGATCTGATTTATGATGTGACCGCCTCTGGATCTGGCTCTG	130399	Hs.562901	GO:0002021|GO:0005024|GO:0005524|GO:0006468|GO:0008285|GO:0009749|GO:0016361|GO:0019915|GO:0030154|GO:0032868|GO:0038092|GO:0038100|GO:0042981|GO:0043280|GO:0046676|GO:0046872|GO:0048179|GO:1901164	activin receptor type-1C isoform 1 precursor	7.00044	48.6002	3.1291	5.17835	8.24106	7.76027	5	48.2567	49.5864	47.9577	3.6957	3.19564	2.49594	5.08559	5.31144	5.13803
ASHGA5P009601	0.0104285	0.044811	2.26505	down	protein_coding	NM_016824	CCDS7561.1	ADD3	RefSeq	4454	chr10	+	111767710	111895323		GGCCTAGAAGATGCTGAGCAGGAATTACTCTCAGATGACGCTTCATCTGTTTCACAAATT	120	Hs.501012	GO:0000794|GO:0003779|GO:0005080|GO:0005200|GO:0005516|GO:0005856|GO:0005886|GO:0005911|GO:0005938|GO:0016020|GO:0042493|GO:0046872	gamma-adducin isoform a	144.951	431.16	7.28168	8.46122	110.756	213.176	110.92	528.883	448.037	316.561	7.13805	7.47115	7.23583	8.73463	8.66563	7.9834
ASHGA5P008991	0.00831604	0.0387948	2.2098	down	protein_coding	NM_007010	CCDS11323.1	DDX52	RefSeq	3822	chr17	-	35972362	36003493		ACAACAACAGAGAGATAACACAGTCCACAGTTTCAGAGCAGGAAAAATCTGGGTTCTGAT	11056	Hs.590937	GO:0003723|GO:0005524|GO:0005730|GO:0008026	probable ATP-dependent RNA helicase DDX52	1823.21	4597.68	10.775	11.9189	1477.83	2588.23	1403.59	5798.96	4614.81	3379.27	10.6392	10.9931	10.6927	12.2244	12.0116	11.5207
ASHGA5P034446	0.000531799	0.00888799	2.48629	down	protein_coding	NM_001079935	CCDS45955.1	OR7E24	RefSeq	1020	chr19	+	9361719	9362739		TGCAGGCTGCATGGCAGAATCATCAAATCTCATCATCTCCATCCTTTTTGTTATATGGGA	26648	Hs.129832	GO:0004930|GO:0004984|GO:0005886|GO:0016021	olfactory receptor 7E24	102.11	356.086	6.89532	8.20932	98.9483	113.517	93.866	345.751	324.855	397.652	6.97768	6.67784	7.03045	8.09841	8.19445	8.33509
ASHGA5P014144	0.0369188	0.102636	2.87664	down	protein_coding	NM_001191321	CCDS53921.1	GABRB3	RefSeq	5543	chr15	-	26788693	26874237		GGCCACCTACCAGACAGAAGAGGATTATACCTTAACCATGTATTTTCAACAATATTGGAG	2562	Hs.302352	GO:0004890|GO:0005230|GO:0005254|GO:0005886|GO:0005887|GO:0006810|GO:0007165|GO:0007268|GO:0030054|GO:0034220|GO:0034707|GO:0045211|GO:0055085	gamma-aminobutyric acid receptor subunit beta-3 isoform 4	14.8194	75.1788	4.30993	5.83431	16.3679	8.8145	19.276	88.3617	72.5411	64.6337	4.61009	3.37375	4.94595	6.01343	5.90322	5.58629
ASHGA5P011134	0.0222997	0.0730699	2.08503	down	protein_coding	NM_001130523	CCDS44197.1	CSDE1	RefSeq	4237	chr1	-	115259533	115300671	NM_001242891	ATCACTGCGAGCTGTTTGAGATGGAGAACGTTTTTACTGTGTCATCAGATCCTCATCCCT	7812	Hs.69855	GO:0003677|GO:0003723|GO:0005737|GO:0006355|GO:0008584	cold shock domain-containing protein E1 isoform 3	5.02763	19.2315	2.66534	3.72541	5.08289	5	5	17.9721	22.9521	16.7704	3.09701	2.40305	2.49594	3.536	4.11681	3.52341
ASHGA5P003237	0.00347567	0.0235024	2.16077	down	protein_coding	NM_012235	CCDS2755.2	SCAP	RefSeq	4255	chr3	-	47455183	47517445		AAACCCTGCAGACTTCAGCCACACTCAAAGACTTGTTATTTGGTGTTCCTGGGAAGTACA	22937	Hs.531789	GO:0000139|GO:0001666|GO:0005515|GO:0005783|GO:0005789|GO:0005794|GO:0006994|GO:0007568|GO:0008203|GO:0012507|GO:0016021|GO:0032868|GO:0042304|GO:0043234|GO:0045541|GO:0045716|GO:0051082	sterol regulatory element-binding protein cleavage-activating protein	11.7352	47.8585	4.03882	5.15037	13.8914	12.7448	8.56947	53.2573	42.556	47.7622	4.38644	3.86147	3.86856	5.23739	5.08201	5.13171
ASHGA5P000922	0.0262505	0.0816457	2.58424	down	protein_coding	NM_006739	CCDS13915.1	MCM5	RefSeq	2568	chr22	+	35796115	35820495		AAGGACTTCACCAAGCAGAAATACCCGGAGCACGCCATCCACAAGGTGCTGCAGCTCATG	4174	Hs.517582	GO:0000075|GO:0000082|GO:0000084|GO:0000216|GO:0000278|GO:0003677|GO:0004386|GO:0005515|GO:0005524|GO:0005634|GO:0005654|GO:0006260|GO:0006270|GO:0006271|GO:0042555	DNA replication licensing factor MCM5	1339.96	3833.61	10.2529	11.6226	965.125	2177.33	877.432	3325.62	2629.38	5545.83	10.0152	10.7388	10.0046	11.4355	11.1949	12.2375
ASHGA5P020652	0.00150607	0.0147827	2.05699	down	protein_coding	NM_001101341	CCDS45097.1	SFTA3	RefSeq	1502	chr14	-	36942493	36982990		TTTGAAAACCCAGTATCAGAATCTACCACTTTGTGCCTGAGGGAGAGGGAAAAGCGGATA	253970	Hs.509165		putative protein SFTA3	5	16.5369	2.45604	3.49657	5	5	5	15.592	14.5179	19.5008	2.46913	2.40305	2.49594	3.3303	3.4028	3.75662
ASHGA5P045609	0.000461737	0.00826849	2.32124	down	protein_coding	NM_001001875	CCDS34985.1	TPD52L3	RefSeq	1353	chr9	+	6328348	6330918	NM_001001874, NM_033516	ATCTGTCCAAGAGCTGGCTTGATGTTCAGGTCTCCAACACCTATGTGAAACAGAAGACAT	89882	Hs.351815		tumor protein D55 isoform 3	7.58354	35.526	3.48767	4.70257	7.23291	8.43005	7.08767	34.4755	35.6581	36.4443	3.52019	3.31134	3.6315	4.57602	4.80563	4.72607
ASHGA5P011814	2.84951e-05	0.00268899	2.21698	down	protein_coding	NM_024820	CCDS35134.1	DENND1A	RefSeq	2166	chr9	-	126163869	126692417		GCCCTGAGCAAAACACCATTGCAACACCAGCTACACTCCACATCCTACAGAAAAGCATTA	57706	Hs.568340	GO:0005085|GO:0005886|GO:0017124|GO:0030054|GO:0030425|GO:0030665|GO:0042734|GO:0043025|GO:0048488	DENN domain-containing protein 1A isoform 2	1092.46	2798.04	10.0754	11.224	988.515	1337.52	951.333	2784.63	2664.2	2945.28	10.0546	10.0328	10.1389	11.1535	11.2167	11.3019
ASHGA5P046358	0.00055377	0.00902808	2.28027	down	protein_coding	NM_001171876	CCDS55517.1	MCF2	RefSeq	3867	chrX	-	138663929	138790381	NM_001099855	TGCTCCTCCGTATAAAGGACATCAGTCATTTCTTAATGCAAGACATCGCCTTCTTGTCTG	4168	Hs.387262	GO:0005089|GO:0005515|GO:0005543|GO:0005829|GO:0005856|GO:0006915|GO:0007264|GO:0008624|GO:0016020|GO:0016358|GO:0035023|GO:0048011|GO:0051056	proto-oncogene DBL isoform c	14.5547	61.0586	4.33591	5.52511	14.6966	17.1364	11.8312	62.1053	64.4592	56.6112	4.46325	4.24837	4.2961	5.46784	5.7178	5.38969
ASHGA5P055854	0.0173436	0.0620215	2.04027	down	protein_coding	NM_005537	CCDS9517.1	ING1	RefSeq	2861	chr13	+	111367358	111373421		TAGCGCAATAACTGGTATGGGTCTGTGTTTCCGCTGTCTTCTTTTTTCTTTTTCGGGGAG	3621	Hs.46700	GO:0005634|GO:0006606|GO:0007049|GO:0008270|GO:0008285|GO:0010941|GO:0030308|GO:0035064|GO:0045893	inhibitor of growth protein 1 isoform D	69.2861	212.889	6.39208	7.42084	75.3575	60.6518	71.8489	237.23	200.126	201.311	6.62076	5.88405	6.67143	7.50785	7.46351	7.29115
ASHGA5P043715	0.00154834	0.0150043	2.36081	down	protein_coding	ENST00000235180	CCDS30670.1	DLGAP3	GENCODE	3587	chr1	-	35331036	35370984		ATCAGTTTGAAAAGCAGTTGCCAGTTCAACAAGATGGCTTCCACACACTACCATACCAGC	58512	Hs.733945	GO:0007267|GO:0005886|GO:0030054|GO:0045211|GO:0019717|GO:0043025|GO:0014069|GO:0005515|GO:0019904|GO:0001540	discs, large (Drosophila) homolog-associated protein 3 [Source:HGNC Symbol;Acc:30368]	11.2025	50.6547	3.99964	5.23893	12.3804	11.2478	9.97932	54.515	45.371	52.0781	4.2345	3.69833	4.0661	5.27328	5.17573	5.26777
ASHGA5P040021	6.68735e-05	0.00345726	2.32092	down	protein_coding	NM_007351	CCDS3635.1	MMRN1	RefSeq	4973	chr4	+	90816051	90875780		TTAAATCAACACTGCCTCCCTCAGAAACAAGTGCACCTGCTGAGGGTGTGAGAAATCAAA	22915	Hs.268107	GO:0002576|GO:0005576|GO:0007155|GO:0007596|GO:0030168|GO:0031093	multimerin-1 precursor	261.186	734.41	8.07485	9.28955	229.705	358.404	195.448	804.549	678.26	720.421	8.07212	8.1759	7.97654	9.35811	9.2937	9.21684
ASHGA5P052359	0.0105205	0.0450282	2.53439	down	protein_coding	NM_001142475	CCDS47255.1	NREP	RefSeq	2149	chr5	-	111064999	111312628		GACAGAGTCCCTTGTTCCAAATGTTTCCAGGTTCACTGCCAGATTTCTGTTCTGAATTGT	9315	Hs.731404	GO:0005634|GO:0005737|GO:0017015|GO:0031103|GO:0045664	neuronal regeneration-related protein isoform c	24.9503	105.917	5.01846	6.3601	33.9056	22.1997	18.7454	110.332	105.252	102.165	5.56825	4.58135	4.90577	6.33364	6.46703	6.27962
ASHGA5P041791	0.0340986	0.0973022	2.58514	down	protein_coding	ENST00000368318	CCDS1124.1	RXFP4	GENCODE	1146	chr1	+	155911479	155912625		TCTATACTATCCAGACGTATGTCTTCCCTGTCACTACTTGCTTGGCACACAGCAATAGCT	339403	Hs.449914	GO:0007186|GO:0016021|GO:0005886|GO:0004945	relaxin/insulin-like family peptide receptor 4 [Source:HGNC Symbol;Acc:14666]	24.1529	98.887	4.88936	6.25961	39.0372	20.058	13.3635	102.015	91.5139	103.132	5.75481	4.4502	4.46309	6.2218	6.26147	6.29556
ASHGA5P007989	0.000969998	0.011821	2.14141	down	protein_coding	NM_001123364	CCDS43489.1	METTL24	RefSeq	1101	chr6	-	110567148	110679475		ATATATCAGCACCACCCAGATTGCATGCAATCACATGAATACAGACAGCCTGGCTACTGA	728464	Hs.722171	GO:0005576|GO:0008168	methyltransferase-like protein 24 precursor	6.96792	30.7597	3.37787	4.47643	6.45782	7.73142	6.71453	30.9729	31.5356	29.7707	3.38149	3.19114	3.56098	4.4119	4.61231	4.40508
ASHGA5P037665	0.0111983	0.0467601	2.07864	down	protein_coding	ENST00000248980	CCDS46694.1	RFPL2	GENCODE	1496	chr22	-	32586421	32589466	ENST00000248983, ENST00000249007, ENST00000397468, ENST00000400236, NM_001159546	TTCAGTTCCACCTAATGGTGATCAAGGTGTCTTGAGCATCTGTCCTTTGATGAACTCAGG	10739	Hs.157427	GO:0008270|GO:0005515	ret finger protein-like 2 [Source:HGNC Symbol;Acc:9979]	6.10213	23.0101	2.96185	4.01749	5.47339	7.83299	5	25.5264	20.9854	22.5185	3.17959	3.21001	2.49594	4.10206	3.97742	3.97298
ASHGA5P042286	0.00158726	0.0151907	2.04436	down	protein_coding	ENST00000357647	CCDS4570.1	HIST1H3A	GENCODE	469	chr6	+	26020717	26021186		GATTACTGTGGTCTCTCTGACGGTCCAAGCAAAGGCTCTTTTCAGAGCCACCACCTTTTC	8350	Hs.546315	GO:0006334|GO:0007596|GO:0060968|GO:0051320|GO:0005634|GO:0005576|GO:0000786|GO:0005654|GO:0003677|GO:0005515	histone cluster 1, H3a [Source:HGNC Symbol;Acc:4766]	74.3289	224.186	6.46945	7.5011	68.192	91.1098	63.6848	213.314	243.797	215.448	6.49113	6.40064	6.51657	7.35124	7.76134	7.39072
ASHGA5P016886	0.0145795	0.0553461	2.27336	down	protein_coding	NM_001177507	CCDS55102.1	AOAH	RefSeq	2344	chr7	-	36552548	36764154		ACCTGTGTAGAAAAACTGTTCTTGAAAACCACCTGCTATTTAGTCATTGACAAGTTTGGA	313	Hs.488007	GO:0003824|GO:0004465|GO:0005576|GO:0006629|GO:0006954|GO:0008653|GO:0050528|GO:0050728	acyloxyacyl hydrolase isoform 3 preproprotein	5.8479	21.5411	2.70856	3.89338	5	7.54369	5	19.4647	18.3498	26.8088	2.46913	3.1606	2.49594	3.66922	3.76746	4.24347
ASHGA5P004436	0.044994	0.117077	2.4602	down	protein_coding	NM_144716	CCDS2748.2	CCDC12	RefSeq	893	chr3	-	46963219	47018270		TAAAAAAGCGGACTCAGAGGGCCATTGCCGAGCTGATCCGTGAAAGGCTGAAAGGCCAGG	151903	Hs.740620		coiled-coil domain-containing protein 12	414.335	1238.92	8.61832	9.91709	303.036	668.74	271.229	995.221	712.476	2009.06	8.43621	9.01745	8.40129	9.68126	9.36536	10.7047
ASHGA5P013208	1.24015e-05	0.00216313	3.83314	down	protein_coding	NM_001177969	CCDS54347.1	VIT	RefSeq	2787	chr2	+	36923832	37041937		ATGTCAGCCTGGGACTTGTTCCAAAAGAAGAATTGAGCACACAGTCTTTGGAGCCAGTAT	5212	Hs.137415	GO:0005539|GO:0005614|GO:0010811|GO:0030198	vitrin isoform 2 precursor	5	29.35	2.45604	4.39457	5	5	5	32.9433	25.2595	29.8471	2.46913	2.40305	2.49594	4.50539	4.26995	4.40836
ASHGA5P004546	6.25691e-05	0.00332844	2.77302	down	protein_coding	ENST00000294671	CCDS720.1	GBP7	GENCODE	2454	chr1	-	89597433	89641723		CCTTGAAGCTGATTTCAGGCAAGAATCCCCAAATCCAAAATTCTAACAAGCCCAGGGAGT	388646	Hs.591450	GO:0016021|GO:0005525|GO:0003924	guanylate binding protein 7 [Source:HGNC Symbol;Acc:29606]	5	21.6725	2.45604	3.9275	5	5	5	21.1024	22.3385	21.5767	2.46913	2.40305	2.49594	3.79924	4.07275	3.91051
ASHGA5P000616	0.000195039	0.00551271	2.1812	down	protein_coding	NM_001164771	CCDS55203.1	SLC7A2	RefSeq	7580	chr8	+	17396285	17428077	NM_001008539	TAATTGCTACTTTATCATCGGGTGCAGTGGCAGCTTTGATGGCCTTTCTGTTTGACCTGA	6542	Hs.448520	GO:0000064|GO:0002537|GO:0005289|GO:0005737|GO:0005886|GO:0005887|GO:0006520|GO:0006809|GO:0006810|GO:0006811|GO:0006865|GO:0015174|GO:0015189|GO:0016020|GO:0042116|GO:0050727|GO:0055085	low affinity cationic amino acid transporter 2 isoform 3	15.6582	63.0036	4.44175	5.56687	15.4043	17.4854	14.085	67.1575	57.6213	64.2321	4.52577	4.27314	4.52635	5.58671	5.53565	5.57826
[truncated: 494 more rows]
